# Supplementary material for: Dissecting Bonding Interactions in Cysteine Dimers
Source: MDPI journal article supplement (doi:10.3390/molecules27248665), 2022-12-07
Supplement: s1 [file s1]

# Dissecting Bonding Interactions in Cysteine Dimers

Santiago Gómez <sup>1</sup>, Sara Gómez <sup>2</sup>, Jorge David <sup>3</sup>, Doris Guerra <sup>1</sup>,  
Chiara Cappelli <sup>2,\*</sup> and Albeiro Restrepo <sup>1,\*</sup>

<sup>1</sup> Instituto de Química, Universidad de Antioquia UdeA, Calle 70 No. 52-21, Medellín 050010, Colombia

<sup>2</sup> Scuola Normale Superiore, Classe di Scienze, Piazza dei Cavalieri 7, 56126 Pisa, Italy

<sup>3</sup> Escuela de Ciencias y Humanidades, Departamento de Ciencias Básicas, Universidad Eafit, AA 3300, Medellín 050022, Colombia

\* Correspondence: chiara.cappelli@sns.it (C.C.); albeiro.restrepo@udea.edu.co (A.R.)

## Supplementary information

# 1 Electrostatic potential of the cysteine monomers

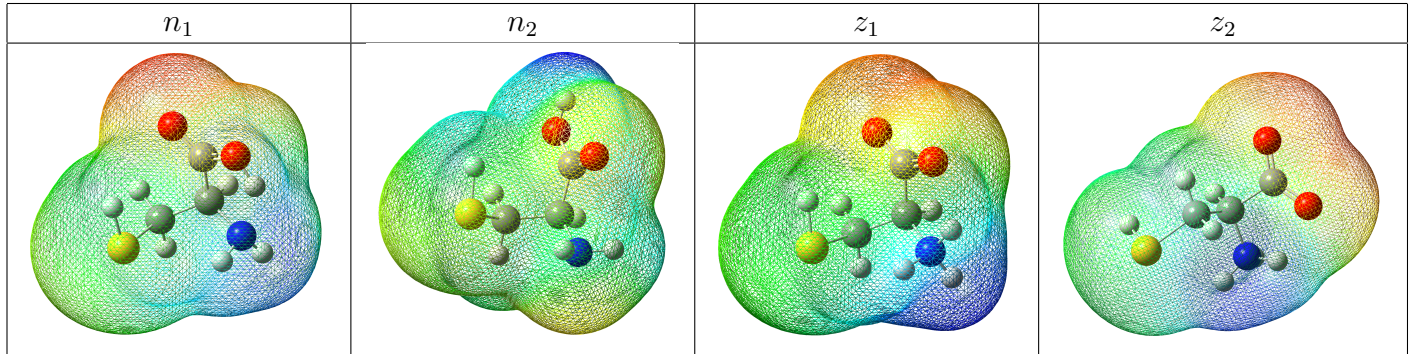

Figure S1: Electrostatic potential surfaces for the cysteine monomers.

## 2 Energetics for cysteine dimers

Table S1: Binding energies and energy differences in kcal mol<sup>-1</sup> for neutral dimers.  $\Delta\Delta G$ : Gibbs energies relative to the global minimum. We list electronic ( $BE_{B3LYP-D3}$ ) and Gibbs ( $BE_{Gibbs}$ ) binding energies corrected by the B3LYP-D3 vibrational ZPE (values within parentheses are calculated for the bare B3LYP functional with no dispersion corrections). Isomer populations  $\% \chi_i(G)$  derived from Boltzmann distributions of the Gibbs energies are also reported.

| Dimer         | Composition | $BE_{B3LYP-D3}$ | $BE_{Gibbs}$ | $\Delta\Delta G$ | $\% \chi_i(G)$ |
|---------------|-------------|-----------------|--------------|------------------|----------------|
| $D_1^{nn}$    | $n_2 + n_2$ | 27.1            | 15.7 (-2.4)  | $\approx 0.0$    | 35.7           |
| $D_2^{nn}$    | $n_2 + n_2$ | 27.0            | 15.6 (-1.4)  | 0.1              | 31.8           |
| $D_3^{nn}$    | $n_2 + n_2$ | 27.3            | 14.9 (-2.1)  | 0.7              | 10.4           |
| $D_4^{nn}$    | $n_2 + n_2$ | 26.8            | 14.2         | 1.5              | 3.1            |
| $D_5^{nn}$    | $n_2 + n_2$ | 26.3            | 13.9         | 1.8              | 1.7            |
| $D_6^{nn}$    | $n_1 + n_1$ | 20.3            | 9.3          | 1.9              | 1.3            |
| $D_7^{nn}$    | $n_2 + n_2$ | 26.3            | 13.7         | 2.0              | 1.3            |
| $D_8^{nn}$    | $n_1 + n_1$ | 19.0            | 9.2          | 2.0              | 1.2            |
| $D_9^{nn}$    | $n_1 + n_1$ | 20.3            | 9.1          | 2.1              | 1.0            |
| $D_{10}^{nn}$ | $n_1 + n_1$ | 20.4            | 9.0          | 2.2              | 0.9            |
| $D_{11}^{nn}$ | $n_1 + n_1$ | 20.7            | 9.0          | 2.2              | 0.8            |
| $D_{12}^{nn}$ | $n_1 + n_1$ | 20.6            | 8.9          | 2.3              | 0.7            |
| $D_{13}^{nn}$ | $n_1 + n_1$ | 20.5            | 8.8          | 2.4              | 0.6            |
| $D_{14}^{nn}$ | $n_1 + n_1$ | 20.5            | 8.8          | 2.4              | 0.6            |
| $D_{15}^{nn}$ | $n_1 + n_1$ | 20.5            | 8.8          | 2.5              | 0.6            |
| $D_{16}^{nn}$ | $n_1 + n_1$ | 20.5            | 8.7          | 2.6              | 0.5            |
| $D_{17}^{nn}$ | $n_1 + n_1$ | 20.2            | 8.7          | 2.6              | 0.5            |

| Dimer                         | Composition | BE <sub>B3LYP-D3</sub> | BE <sub>Gibbs</sub> | $\Delta\Delta G$ | % $\chi_i(G)$ |
|-------------------------------|-------------|------------------------|---------------------|------------------|---------------|
| D <sub>18</sub> <sup>nn</sup> | $n_1 + n_1$ | 20.4                   | 8.6                 | 2.7              | 0.4           |
| D <sub>19</sub> <sup>nn</sup> | $n_1 + n_1$ | 20.4                   | 8.6                 | 2.7              | 0.4           |
| D <sub>20</sub> <sup>nn</sup> | $n_1 + n_1$ | 19.9                   | 8.5                 | 2.7              | 0.4           |
| D <sub>21</sub> <sup>nn</sup> | $n_1 + n_1$ | 20.2                   | 8.5                 | 2.7              | 0.4           |
| D <sub>22</sub> <sup>nn</sup> | $n_1 + n_1$ | 20.7                   | 8.4                 | 2.8              | 0.3           |
| D <sub>23</sub> <sup>nn</sup> | $n_1 + n_1$ | 20.0                   | 8.3                 | 3.0              | 0.2           |
| D <sub>24</sub> <sup>nn</sup> | $n_1 + n_1$ | 19.2                   | 8.2                 | 3.0              | 0.2           |
| D <sub>25</sub> <sup>nn</sup> | $n_1 + n_1$ | 18.8                   | 8.2                 | 3.0              | 0.2           |
| D <sub>26</sub> <sup>nn</sup> | $n_1 + n_1$ | 20.3                   | 8.2                 | 3.0              | 0.2           |
| D <sub>27</sub> <sup>nn</sup> | $n_1 + n_1$ | 18.8                   | 8.2                 | 3.0              | 0.2           |
| D <sub>28</sub> <sup>nn</sup> | $n_1 + n_1$ | 19.8                   | 8.1                 | 3.1              | 0.2           |
| D <sub>29</sub> <sup>nn</sup> | $n_1 + n_1$ | 18.3                   | 8.1                 | 3.2              | 0.2           |
| D <sub>30</sub> <sup>nn</sup> | $n_1 + n_1$ | 20.0                   | 8.1                 | 3.2              | 0.2           |
| D <sub>31</sub> <sup>nn</sup> | $n_1 + n_1$ | 19.1                   | 8.1                 | 3.2              | 0.2           |
| D <sub>32</sub> <sup>nn</sup> | $n_1 + n_1$ | 19.4                   | 8.0                 | 3.2              | 0.2           |
| D <sub>33</sub> <sup>nn</sup> | $n_1 + n_1$ | 19.3                   | 8.0                 | 3.2              | 0.2           |
| D <sub>34</sub> <sup>nn</sup> | $n_1 + n_1$ | 19.7                   | 8.0                 | 3.2              | 0.2           |
| D <sub>35</sub> <sup>nn</sup> | $n_1 + n_1$ | 19.4                   | 8.0                 | 3.2              | 0.2           |
| D <sub>36</sub> <sup>nn</sup> | $n_1 + n_1$ | 19.6                   | 7.9                 | 3.3              | 0.1           |
| D <sub>37</sub> <sup>nn</sup> | $n_1 + n_1$ | 19.0                   | 7.9                 | 3.4              | 0.1           |
| D <sub>38</sub> <sup>nn</sup> | $n_1 + n_1$ | 19.7                   | 7.8                 | 3.4              | 0.1           |
| D <sub>39</sub> <sup>nn</sup> | $n_1 + n_1$ | 19.7                   | 7.8                 | 3.4              | 0.1           |
| D <sub>40</sub> <sup>nn</sup> | $n_1 + n_1$ | 18.8                   | 7.8                 | 3.4              | 0.1           |
| D <sub>41</sub> <sup>nn</sup> | $n_1 + n_1$ | 18.8                   | 7.8                 | 3.5              | 0.1           |
| D <sub>42</sub> <sup>nn</sup> | $n_1 + n_1$ | 19.1                   | 7.8                 | 3.5              | 0.1           |
| D <sub>43</sub> <sup>nn</sup> | $n_1 + n_1$ | 19.5                   | 7.7                 | 3.5              | 0.1           |
| D <sub>44</sub> <sup>nn</sup> | $n_1 + n_1$ | 19.5                   | 7.7                 | 3.5              | 0.1           |
| D <sub>45</sub> <sup>nn</sup> | $n_1 + n_1$ | 20.3                   | 7.7                 | 3.6              | 0.1           |
| D <sub>46</sub> <sup>nn</sup> | $n_1 + n_1$ | 17.9                   | 7.7                 | 3.6              | 0.1           |
| D <sub>47</sub> <sup>nn</sup> | $n_1 + n_1$ | 20.0                   | 7.6                 | 3.6              | 0.1           |
| D <sub>48</sub> <sup>nn</sup> | $n_1 + n_1$ | 20.0                   | 7.6                 | 3.6              | 0.1           |
| D <sub>49</sub> <sup>nn</sup> | $n_1 + n_1$ | 19.5                   | 7.6                 | 3.6              | 0.1           |
| D <sub>50</sub> <sup>nn</sup> | $n_1 + n_1$ | 19.6                   | 7.6                 | 3.7              | 0.1           |
| D <sub>51</sub> <sup>nn</sup> | $n_1 + n_1$ | 19.9                   | 7.5                 | 3.7              | 0.1           |
| D <sub>52</sub> <sup>nn</sup> | $n_1 + n_1$ | 19.2                   | 7.5                 | 3.7              | 0.1           |

| Dimer                         | Composition | BE <sub>B3LYP-D3</sub> | BE <sub>Gibbs</sub> | $\Delta\Delta G$ | % $\chi_i(G)$ |
|-------------------------------|-------------|------------------------|---------------------|------------------|---------------|
| D <sub>53</sub> <sup>nn</sup> | $n_1 + n_1$ | 18.3                   | 7.5                 | 3.7              | 0.1           |
| D <sub>54</sub> <sup>nn</sup> | $n_1 + n_1$ | 19.5                   | 7.5                 | 3.8              | 0.1           |
| D <sub>55</sub> <sup>nn</sup> | $n_1 + n_1$ | 19.1                   | 7.5                 | 3.8              | 0.1           |
| D <sub>56</sub> <sup>nn</sup> | $n_1 + n_1$ | 18.7                   | 7.4                 | 3.8              | 0.1           |
| D <sub>57</sub> <sup>nn</sup> | $n_1 + n_1$ | 18.6                   | 7.4                 | 3.8              | 0.1           |
| D <sub>58</sub> <sup>nn</sup> | $n_1 + n_1$ | 18.9                   | 7.4                 | 3.8              | 0.1           |
| D <sub>59</sub> <sup>nn</sup> | $n_1 + n_1$ | 19.5                   | 7.4                 | 3.9              | 0.1           |
| D <sub>60</sub> <sup>nn</sup> | $n_1 + n_1$ | 19.5                   | 7.4                 | 3.9              | 0.1           |
| D <sub>61</sub> <sup>nn</sup> | $n_1 + n_1$ | 19.4                   | 7.3                 | 3.9              | 0.1           |
| D <sub>62</sub> <sup>nn</sup> | $n_1 + n_1$ | 19.2                   | 7.2                 | 4.0              | $\approx 0.0$ |
| D <sub>63</sub> <sup>nn</sup> | $n_1 + n_1$ | 18.8                   | 7.2                 | 4.0              | $\approx 0.0$ |
| D <sub>64</sub> <sup>nn</sup> | $n_1 + n_1$ | 17.9                   | 7.2                 | 4.0              | $\approx 0.0$ |
| D <sub>65</sub> <sup>nn</sup> | $n_1 + n_1$ | 17.4                   | 7.1                 | 4.1              | $\approx 0.0$ |
| D <sub>66</sub> <sup>nn</sup> | $n_1 + n_1$ | 17.3                   | 7.1                 | 4.1              | $\approx 0.0$ |
| D <sub>67</sub> <sup>nn</sup> | $n_1 + n_1$ | 17.8                   | 7.1                 | 4.2              | $\approx 0.0$ |
| D <sub>68</sub> <sup>nn</sup> | $n_2 + n_2$ | 24.1                   | 11.5                | 4.2              | $\approx 0.0$ |
| D <sub>69</sub> <sup>nn</sup> | $n_1 + n_1$ | 18.0                   | 7.0                 | 4.2              | $\approx 0.0$ |
| D <sub>70</sub> <sup>nn</sup> | $n_1 + n_1$ | 18.0                   | 7.0                 | 4.2              | $\approx 0.0$ |
| D <sub>71</sub> <sup>nn</sup> | $n_1 + n_1$ | 17.7                   | 7.0                 | 4.2              | $\approx 0.0$ |
| D <sub>72</sub> <sup>nn</sup> | $n_1 + n_1$ | 17.3                   | 7.0                 | 4.3              | $\approx 0.0$ |
| D <sub>73</sub> <sup>nn</sup> | $n_1 + n_1$ | 18.4                   | 6.9                 | 4.3              | $\approx 0.0$ |
| D <sub>74</sub> <sup>nn</sup> | $n_1 + n_1$ | 18.0                   | 6.9                 | 4.3              | $\approx 0.0$ |
| D <sub>75</sub> <sup>nn</sup> | $n_1 + n_1$ | 18.0                   | 6.9                 | 4.4              | $\approx 0.0$ |
| D <sub>76</sub> <sup>nn</sup> | $n_1 + n_1$ | 17.4                   | 6.9                 | 4.4              | $\approx 0.0$ |
| D <sub>77</sub> <sup>nn</sup> | $n_1 + n_1$ | 18.9                   | 6.9                 | 4.4              | $\approx 0.0$ |
| D <sub>78</sub> <sup>nn</sup> | $n_1 + n_1$ | 18.8                   | 6.8                 | 4.4              | $\approx 0.0$ |
| D <sub>79</sub> <sup>nn</sup> | $n_1 + n_1$ | 18.0                   | 6.8                 | 4.4              | $\approx 0.0$ |
| D <sub>80</sub> <sup>nn</sup> | $n_1 + n_1$ | 18.2                   | 6.8                 | 4.4              | $\approx 0.0$ |
| D <sub>81</sub> <sup>nn</sup> | $n_1 + n_1$ | 17.1                   | 6.7                 | 4.5              | $\approx 0.0$ |
| D <sub>82</sub> <sup>nn</sup> | $n_1 + n_1$ | 18.9                   | 6.7                 | 4.6              | $\approx 0.0$ |
| D <sub>83</sub> <sup>nn</sup> | $n_1 + n_1$ | 17.9                   | 6.5                 | 4.8              | $\approx 0.0$ |
| D <sub>84</sub> <sup>nn</sup> | $n_1 + n_1$ | 16.6                   | 6.4                 | 4.8              | $\approx 0.0$ |
| D <sub>85</sub> <sup>nn</sup> | $n_1 + n_1$ | 17.5                   | 6.4                 | 4.8              | $\approx 0.0$ |
| D <sub>86</sub> <sup>nn</sup> | $n_1 + n_1$ | 17.7                   | 6.3                 | 4.9              | $\approx 0.0$ |
| D <sub>87</sub> <sup>nn</sup> | $n_1 + n_1$ | 18.0                   | 6.3                 | 5.0              | $\approx 0.0$ |



| Dimer                          | Composition | BE <sub>B3LYP-D3</sub> | BE <sub>Gibbs</sub> | $\Delta\Delta G$ | % $\chi_i(G)$ |
|--------------------------------|-------------|------------------------|---------------------|------------------|---------------|
| D <sub>88</sub> <sup>nn</sup>  | $n_2 + n_2$ | 22.3                   | 10.7                | 5.0              | $\approx 0.0$ |
| D <sub>89</sub> <sup>nn</sup>  | $n_1 + n_1$ | 17.0                   | 6.2                 | 5.0              | $\approx 0.0$ |
| D <sub>90</sub> <sup>nn</sup>  | $n_1 + n_1$ | 17.3                   | 6.2                 | 5.0              | $\approx 0.0$ |
| D <sub>91</sub> <sup>nn</sup>  | $n_2 + n_2$ | 21.4                   | 10.6                | 5.1              | $\approx 0.0$ |
| D <sub>92</sub> <sup>nn</sup>  | $n_1 + n_1$ | 16.4                   | 6.1                 | 5.1              | $\approx 0.0$ |
| D <sub>93</sub> <sup>nn</sup>  | $n_1 + n_1$ | 17.1                   | 6.0                 | 5.2              | $\approx 0.0$ |
| D <sub>94</sub> <sup>nn</sup>  | $n_1 + n_1$ | 16.9                   | 6.0                 | 5.2              | $\approx 0.0$ |
| D <sub>95</sub> <sup>nn</sup>  | $n_1 + n_1$ | 16.8                   | 5.8                 | 5.4              | $\approx 0.0$ |
| D <sub>96</sub> <sup>nn</sup>  | $n_2 + n_2$ | 22.6                   | 9.9                 | 5.7              | $\approx 0.0$ |
| D <sub>97</sub> <sup>nn</sup>  | $n_1 + n_1$ | 16.2                   | 5.4                 | 5.8              | $\approx 0.0$ |
| D <sub>98</sub> <sup>nn</sup>  | $n_2 + n_2$ | 22.4                   | 9.7                 | 5.9              | $\approx 0.0$ |
| D <sub>99</sub> <sup>nn</sup>  | $n_2 + n_2$ | 20.8                   | 9.5                 | 6.2              | $\approx 0.0$ |
| D <sub>100</sub> <sup>nn</sup> | $n_2 + n_2$ | 22.6                   | 9.3                 | 6.3              | $\approx 0.0$ |
| D <sub>101</sub> <sup>nn</sup> | $n_2 + n_2$ | 20.8                   | 9.3                 | 6.4              | $\approx 0.0$ |
| D <sub>102</sub> <sup>nn</sup> | $n_2 + n_2$ | 23.2                   | 9.1                 | 6.5              | $\approx 0.0$ |
| D <sub>103</sub> <sup>nn</sup> | $n_2 + n_2$ | 20.4                   | 9.1                 | 6.5              | $\approx 0.0$ |
| D <sub>104</sub> <sup>nn</sup> | $n_2 + n_2$ | 20.4                   | 9.0                 | 6.6              | $\approx 0.0$ |
| D <sub>105</sub> <sup>nn</sup> | $n_2 + n_2$ | 20.6                   | 9.0                 | 6.6              | $\approx 0.0$ |
| D <sub>106</sub> <sup>nn</sup> | $n_2 + n_2$ | 20.6                   | 9.0                 | 6.7              | $\approx 0.0$ |
| D <sub>107</sub> <sup>nn</sup> | $n_2 + n_2$ | 18.6                   | 9.0                 | 6.7              | $\approx 0.0$ |
| D <sub>108</sub> <sup>nn</sup> | $n_2 + n_2$ | 20.7                   | 8.8                 | 6.8              | $\approx 0.0$ |
| D <sub>109</sub> <sup>nn</sup> | $n_2 + n_2$ | 19.8                   | 8.8                 | 6.8              | $\approx 0.0$ |
| D <sub>110</sub> <sup>nn</sup> | $n_2 + n_2$ | 19.8                   | 8.8                 | 6.8              | $\approx 0.0$ |
| D <sub>111</sub> <sup>nn</sup> | $n_2 + n_2$ | 19.8                   | 8.8                 | 6.9              | $\approx 0.0$ |
| D <sub>112</sub> <sup>nn</sup> | $n_2 + n_2$ | 21.6                   | 8.8                 | 6.9              | $\approx 0.0$ |
| D <sub>113</sub> <sup>nn</sup> | $n_2 + n_2$ | 21.9                   | 8.7                 | 7.0              | $\approx 0.0$ |
| D <sub>114</sub> <sup>nn</sup> | $n_2 + n_2$ | 21.2                   | 8.7                 | 7.0              | $\approx 0.0$ |
| D <sub>115</sub> <sup>nn</sup> | $n_2 + n_2$ | 19.9                   | 8.6                 | 7.1              | $\approx 0.0$ |
| D <sub>116</sub> <sup>nn</sup> | $n_2 + n_2$ | 19.4                   | 8.5                 | 7.2              | $\approx 0.0$ |
| D <sub>117</sub> <sup>nn</sup> | $n_2 + n_2$ | 19.8                   | 8.5                 | 7.2              | $\approx 0.0$ |
| D <sub>118</sub> <sup>nn</sup> | $n_2 + n_2$ | 21.5                   | 8.5                 | 7.2              | $\approx 0.0$ |
| D <sub>119</sub> <sup>nn</sup> | $n_2 + n_2$ | 18.7                   | 8.3                 | 7.3              | $\approx 0.0$ |
| D <sub>120</sub> <sup>nn</sup> | $n_2 + n_2$ | 21.4                   | 8.3                 | 7.3              | $\approx 0.0$ |
| D <sub>121</sub> <sup>nn</sup> | $n_2 + n_2$ | 21.0                   | 8.3                 | 7.4              | $\approx 0.0$ |
| D <sub>122</sub> <sup>nn</sup> | $n_2 + n_2$ | 18.8                   | 8.3                 | 7.4              | $\approx 0.0$ |

| Dimer                          | Composition | BE <sub>B3LYP-D3</sub> | BE <sub>Gibbs</sub> | $\Delta\Delta G$ | % $\chi_i(G)$ |
|--------------------------------|-------------|------------------------|---------------------|------------------|---------------|
| D <sub>123</sub> <sup>nn</sup> | $n_2 + n_2$ | 20.6                   | 8.2                 | 7.5              | $\approx 0.0$ |
| D <sub>124</sub> <sup>nn</sup> | $n_2 + n_2$ | 19.4                   | 8.1                 | 7.5              | $\approx 0.0$ |
| D <sub>125</sub> <sup>nn</sup> | $n_2 + n_2$ | 19.5                   | 8.1                 | 7.6              | $\approx 0.0$ |
| D <sub>126</sub> <sup>nn</sup> | $n_2 + n_2$ | 20.9                   | 8.0                 | 7.6              | $\approx 0.0$ |
| D <sub>127</sub> <sup>nn</sup> | $n_2 + n_2$ | 20.3                   | 8.0                 | 7.6              | $\approx 0.0$ |
| D <sub>128</sub> <sup>nn</sup> | $n_2 + n_2$ | 20.6                   | 8.0                 | 7.7              | $\approx 0.0$ |
| D <sub>129</sub> <sup>nn</sup> | $n_2 + n_2$ | 20.3                   | 7.9                 | 7.7              | $\approx 0.0$ |
| D <sub>130</sub> <sup>nn</sup> | $n_2 + n_2$ | 20.1                   | 7.9                 | 7.8              | $\approx 0.0$ |
| D <sub>131</sub> <sup>nn</sup> | $n_2 + n_2$ | 20.4                   | 7.9                 | 7.8              | $\approx 0.0$ |
| D <sub>132</sub> <sup>nn</sup> | $n_2 + n_2$ | 20.5                   | 7.8                 | 7.9              | $\approx 0.0$ |
| D <sub>133</sub> <sup>nn</sup> | $n_2 + n_2$ | 20.4                   | 7.8                 | 7.9              | $\approx 0.0$ |
| D <sub>134</sub> <sup>nn</sup> | $n_2 + n_2$ | 17.3                   | 7.8                 | 7.9              | $\approx 0.0$ |
| D <sub>135</sub> <sup>nn</sup> | $n_2 + n_2$ | 19.5                   | 7.8                 | 7.9              | $\approx 0.0$ |
| D <sub>136</sub> <sup>nn</sup> | $n_2 + n_2$ | 18.2                   | 7.7                 | 8.0              | $\approx 0.0$ |
| D <sub>137</sub> <sup>nn</sup> | $n_2 + n_2$ | 18.5                   | 7.6                 | 8.0              | $\approx 0.0$ |
| D <sub>138</sub> <sup>nn</sup> | $n_2 + n_2$ | 18.3                   | 7.6                 | 8.1              | $\approx 0.0$ |
| D <sub>139</sub> <sup>nn</sup> | $n_2 + n_2$ | 18.9                   | 7.5                 | 8.2              | $\approx 0.0$ |
| D <sub>140</sub> <sup>nn</sup> | $n_2 + n_2$ | 18.7                   | 7.5                 | 8.2              | $\approx 0.0$ |
| D <sub>141</sub> <sup>nn</sup> | $n_2 + n_2$ | 20.6                   | 7.5                 | 8.2              | $\approx 0.0$ |
| D <sub>142</sub> <sup>nn</sup> | $n_2 + n_2$ | 17.6                   | 7.5                 | 8.2              | $\approx 0.0$ |
| D <sub>143</sub> <sup>nn</sup> | $n_2 + n_2$ | 17.3                   | 7.5                 | 8.2              | $\approx 0.0$ |
| D <sub>144</sub> <sup>nn</sup> | $n_2 + n_2$ | 17.7                   | 7.4                 | 8.2              | $\approx 0.0$ |
| D <sub>145</sub> <sup>nn</sup> | $n_2 + n_2$ | 18.7                   | 7.4                 | 8.2              | $\approx 0.0$ |
| D <sub>146</sub> <sup>nn</sup> | $n_2 + n_2$ | 19.4                   | 7.4                 | 8.2              | $\approx 0.0$ |
| D <sub>147</sub> <sup>nn</sup> | $n_2 + n_2$ | 17.7                   | 7.4                 | 8.2              | $\approx 0.0$ |
| D <sub>148</sub> <sup>nn</sup> | $n_2 + n_2$ | 19.7                   | 7.4                 | 8.3              | $\approx 0.0$ |
| D <sub>149</sub> <sup>nn</sup> | $n_2 + n_2$ | 18.6                   | 7.4                 | 8.3              | $\approx 0.0$ |
| D <sub>150</sub> <sup>nn</sup> | $n_2 + n_2$ | 18.1                   | 7.4                 | 8.3              | $\approx 0.0$ |
| D <sub>151</sub> <sup>nn</sup> | $n_2 + n_2$ | 18.0                   | 7.3                 | 8.4              | $\approx 0.0$ |
| D <sub>152</sub> <sup>nn</sup> | $n_2 + n_2$ | 18.2                   | 7.3                 | 8.4              | $\approx 0.0$ |
| D <sub>153</sub> <sup>nn</sup> | $n_2 + n_2$ | 18.1                   | 7.3                 | 8.4              | $\approx 0.0$ |
| D <sub>154</sub> <sup>nn</sup> | $n_2 + n_2$ | 19.9                   | 7.3                 | 8.4              | $\approx 0.0$ |
| D <sub>155</sub> <sup>nn</sup> | $n_2 + n_2$ | 18.0                   | 7.2                 | 8.5              | $\approx 0.0$ |
| D <sub>156</sub> <sup>nn</sup> | $n_2 + n_2$ | 18.1                   | 7.1                 | 8.5              | $\approx 0.0$ |
| D <sub>157</sub> <sup>nn</sup> | $n_2 + n_2$ | 18.7                   | 7.0                 | 8.6              | $\approx 0.0$ |

| Dimer                          | Composition | BE <sub>B3LYP-D3</sub> | BE <sub>Gibbs</sub> | $\Delta\Delta G$ | % $\chi_i(G)$ |
|--------------------------------|-------------|------------------------|---------------------|------------------|---------------|
| D <sub>158</sub> <sup>nn</sup> | $n_2 + n_2$ | 17.4                   | 7.0                 | 8.7              | $\approx 0.0$ |
| D <sub>159</sub> <sup>nn</sup> | $n_2 + n_2$ | 18.8                   | 6.9                 | 8.7              | $\approx 0.0$ |
| D <sub>160</sub> <sup>nn</sup> | $n_2 + n_2$ | 17.0                   | 6.8                 | 8.8              | $\approx 0.0$ |
| D <sub>161</sub> <sup>nn</sup> | $n_2 + n_2$ | 19.1                   | 6.8                 | 8.9              | $\approx 0.0$ |
| D <sub>162</sub> <sup>nn</sup> | $n_2 + n_2$ | 17.9                   | 6.7                 | 8.9              | $\approx 0.0$ |
| D <sub>163</sub> <sup>nn</sup> | $n_2 + n_2$ | 17.0                   | 6.5                 | 9.1              | $\approx 0.0$ |
| D <sub>164</sub> <sup>nn</sup> | $n_2 + n_2$ | 18.1                   | 6.4                 | 9.2              | $\approx 0.0$ |
| D <sub>165</sub> <sup>nn</sup> | $n_1 + n_2$ | 7.2                    | -2.3                | 15.7             | $\approx 0.0$ |
| D <sub>166</sub> <sup>nn</sup> | $n_1 + n_2$ | 9.0                    | -2.3                | 15.7             | $\approx 0.0$ |
| D <sub>167</sub> <sup>nn</sup> | $n_1 + n_2$ | 8.1                    | -2.6                | 16.0             | $\approx 0.0$ |
| D <sub>168</sub> <sup>nn</sup> | $n_1 + n_2$ | 9.0                    | -2.6                | 16.0             | $\approx 0.0$ |
| D <sub>169</sub> <sup>nn</sup> | $n_1 + n_2$ | 8.4                    | -2.8                | 16.2             | $\approx 0.0$ |
| D <sub>170</sub> <sup>nn</sup> | $n_1 + n_2$ | 6.6                    | -3.6                | 17.0             | $\approx 0.0$ |
| D <sub>171</sub> <sup>nn</sup> | $n_1 + n_2$ | 5.2                    | -3.8                | 17.2             | $\approx 0.0$ |
| D <sub>172</sub> <sup>nn</sup> | $n_1 + n_2$ | 6.3                    | -4.4                | 17.8             | $\approx 0.0$ |
| D <sub>173</sub> <sup>nn</sup> | $n_1 + n_2$ | 6.8                    | -4.5                | 17.9             | $\approx 0.0$ |
| D <sub>174</sub> <sup>nn</sup> | $n_1 + n_2$ | 5.6                    | -4.6                | 18.0             | $\approx 0.0$ |
| D <sub>175</sub> <sup>nn</sup> | $n_1 + n_2$ | 5.9                    | -4.6                | 18.0             | $\approx 0.0$ |
| D <sub>176</sub> <sup>nn</sup> | $n_1 + n_2$ | 5.9                    | -4.8                | 18.2             | $\approx 0.0$ |
| D <sub>177</sub> <sup>nn</sup> | $n_1 + n_2$ | 6.7                    | -4.8                | 18.2             | $\approx 0.0$ |
| D <sub>178</sub> <sup>nn</sup> | $n_1 + n_2$ | 5.0                    | -5.0                | 18.5             | $\approx 0.0$ |
| D <sub>179</sub> <sup>nn</sup> | $n_1 + n_2$ | 4.9                    | -5.1                | 18.5             | $\approx 0.0$ |
| D <sub>180</sub> <sup>nn</sup> | $n_1 + n_2$ | 3.1                    | -5.2                | 18.6             | $\approx 0.0$ |
| D <sub>181</sub> <sup>nn</sup> | $n_1 + n_2$ | 2.3                    | -5.3                | 18.8             | $\approx 0.0$ |
| D <sub>182</sub> <sup>nn</sup> | $n_1 + n_2$ | 3.1                    | -5.4                | 18.9             | $\approx 0.0$ |
| D <sub>183</sub> <sup>nn</sup> | $n_1 + n_2$ | 4.4                    | -5.5                | 18.9             | $\approx 0.0$ |
| D <sub>184</sub> <sup>nn</sup> | $n_1 + n_2$ | 4.8                    | -5.5                | 18.9             | $\approx 0.0$ |
| D <sub>185</sub> <sup>nn</sup> | $n_1 + n_2$ | 5.1                    | -5.5                | 18.9             | $\approx 0.0$ |
| D <sub>186</sub> <sup>nn</sup> | $n_1 + n_2$ | 3.0                    | -5.5                | 19.0             | $\approx 0.0$ |
| D <sub>187</sub> <sup>nn</sup> | $n_1 + n_2$ | 3.1                    | -5.5                | 19.0             | $\approx 0.0$ |
| D <sub>188</sub> <sup>nn</sup> | $n_1 + n_2$ | 3.9                    | -5.6                | 19.0             | $\approx 0.0$ |
| D <sub>189</sub> <sup>nn</sup> | $n_1 + n_2$ | 6.5                    | -5.6                | 19.0             | $\approx 0.0$ |
| D <sub>190</sub> <sup>nn</sup> | $n_1 + n_2$ | 3.4                    | -5.6                | 19.0             | $\approx 0.0$ |
| D <sub>191</sub> <sup>nn</sup> | $n_1 + n_2$ | 6.3                    | -5.6                | 19.1             | $\approx 0.0$ |
| D <sub>192</sub> <sup>nn</sup> | $n_1 + n_2$ | 4.9                    | -5.6                | 19.1             | $\approx 0.0$ |

| Dimer                          | Composition | BE <sub>B3LYP-D3</sub> | BE <sub>Gibbs</sub> | $\Delta\Delta G$ | % $\chi_i(G)$ |
|--------------------------------|-------------|------------------------|---------------------|------------------|---------------|
| D <sub>193</sub> <sup>nn</sup> | $n_1 + n_2$ | 3.6                    | -5.7                | 19.1             | $\approx 0.0$ |
| D <sub>194</sub> <sup>nn</sup> | $n_1 + n_2$ | 4.8                    | -5.7                | 19.2             | $\approx 0.0$ |
| D <sub>195</sub> <sup>nn</sup> | $n_1 + n_2$ | 5.7                    | -5.7                | 19.2             | $\approx 0.0$ |
| D <sub>196</sub> <sup>nn</sup> | $n_1 + n_2$ | 5.4                    | -5.8                | 19.3             | $\approx 0.0$ |
| D <sub>197</sub> <sup>nn</sup> | $n_1 + n_2$ | 5.3                    | -5.8                | 19.3             | $\approx 0.0$ |
| D <sub>198</sub> <sup>nn</sup> | $n_1 + n_2$ | 4.1                    | -5.9                | 19.3             | $\approx 0.0$ |
| D <sub>199</sub> <sup>nn</sup> | $n_1 + n_2$ | 3.3                    | -5.9                | 19.3             | $\approx 0.0$ |
| D <sub>200</sub> <sup>nn</sup> | $n_1 + n_2$ | 3.6                    | -6.0                | 19.4             | $\approx 0.0$ |
| D <sub>201</sub> <sup>nn</sup> | $n_1 + n_2$ | 5.0                    | -6.0                | 19.4             | $\approx 0.0$ |
| D <sub>202</sub> <sup>nn</sup> | $n_1 + n_2$ | 3.1                    | -6.0                | 19.4             | $\approx 0.0$ |
| D <sub>203</sub> <sup>nn</sup> | $n_1 + n_2$ | 3.7                    | -6.1                | 19.5             | $\approx 0.0$ |
| D <sub>204</sub> <sup>nn</sup> | $n_1 + n_2$ | 5.4                    | -6.1                | 19.6             | $\approx 0.0$ |
| D <sub>205</sub> <sup>nn</sup> | $n_1 + n_2$ | 3.3                    | -6.2                | 19.6             | $\approx 0.0$ |
| D <sub>206</sub> <sup>nn</sup> | $n_1 + n_2$ | 3.3                    | -6.2                | 19.6             | $\approx 0.0$ |
| D <sub>207</sub> <sup>nn</sup> | $n_1 + n_2$ | 3.2                    | -6.2                | 19.7             | $\approx 0.0$ |
| D <sub>208</sub> <sup>nn</sup> | $n_1 + n_2$ | 3.4                    | -6.2                | 19.7             | $\approx 0.0$ |
| D <sub>209</sub> <sup>nn</sup> | $n_1 + n_2$ | 2.9                    | -6.3                | 19.7             | $\approx 0.0$ |
| D <sub>210</sub> <sup>nn</sup> | $n_1 + n_2$ | 3.2                    | -6.3                | 19.7             | $\approx 0.0$ |
| D <sub>211</sub> <sup>nn</sup> | $n_1 + n_2$ | 4.1                    | -6.3                | 19.7             | $\approx 0.0$ |
| D <sub>212</sub> <sup>nn</sup> | $n_1 + n_2$ | 3.3                    | -6.3                | 19.8             | $\approx 0.0$ |
| D <sub>213</sub> <sup>nn</sup> | $n_1 + n_2$ | 4.6                    | -6.3                | 19.8             | $\approx 0.0$ |
| D <sub>214</sub> <sup>nn</sup> | $n_1 + n_2$ | 5.4                    | -6.3                | 19.8             | $\approx 0.0$ |
| D <sub>215</sub> <sup>nn</sup> | $n_1 + n_2$ | 3.2                    | -6.4                | 19.9             | $\approx 0.0$ |
| D <sub>216</sub> <sup>nn</sup> | $n_1 + n_2$ | 2.8                    | -6.4                | 19.9             | $\approx 0.0$ |
| D <sub>217</sub> <sup>nn</sup> | $n_1 + n_2$ | 3.0                    | -6.4                | 19.9             | $\approx 0.0$ |
| D <sub>218</sub> <sup>nn</sup> | $n_1 + n_2$ | 2.8                    | -6.5                | 19.9             | $\approx 0.0$ |
| D <sub>219</sub> <sup>nn</sup> | $n_1 + n_2$ | 3.2                    | -6.5                | 19.9             | $\approx 0.0$ |
| D <sub>220</sub> <sup>nn</sup> | $n_1 + n_2$ | 3.0                    | -6.5                | 19.9             | $\approx 0.0$ |
| D <sub>221</sub> <sup>nn</sup> | $n_1 + n_2$ | 3.6                    | -6.5                | 19.9             | $\approx 0.0$ |
| D <sub>222</sub> <sup>nn</sup> | $n_1 + n_2$ | 3.6                    | -6.5                | 20.0             | $\approx 0.0$ |
| D <sub>223</sub> <sup>nn</sup> | $n_1 + n_2$ | 3.2                    | -6.5                | 20.0             | $\approx 0.0$ |
| D <sub>224</sub> <sup>nn</sup> | $n_1 + n_2$ | 3.2                    | -6.6                | 20.0             | $\approx 0.0$ |
| D <sub>225</sub> <sup>nn</sup> | $n_1 + n_2$ | 3.7                    | -6.7                | 20.1             | $\approx 0.0$ |
| D <sub>226</sub> <sup>nn</sup> | $n_1 + n_2$ | 3.4                    | -6.7                | 20.1             | $\approx 0.0$ |
| D <sub>227</sub> <sup>nn</sup> | $n_1 + n_2$ | 2.8                    | -6.7                | 20.1             | $\approx 0.0$ |

| Dimer                 | Composition | $\text{BE}_{\text{B3LYP-D3}}$ | $\text{BE}_{\text{Gibbs}}$ | $\Delta\Delta\text{G}$ | $\%\chi_i(G)$ |
|-----------------------|-------------|-------------------------------|----------------------------|------------------------|---------------|
| $\text{D}_{228}^{nn}$ | $n_1 + n_2$ | 4.0                           | -6.7                       | 20.1                   | $\approx 0.0$ |
| $\text{D}_{229}^{nn}$ | $n_1 + n_2$ | 4.5                           | -6.7                       | 20.1                   | $\approx 0.0$ |
| $\text{D}_{230}^{nn}$ | $n_1 + n_2$ | 4.5                           | -6.8                       | 20.2                   | $\approx 0.0$ |
| $\text{D}_{231}^{nn}$ | $n_1 + n_2$ | 3.0                           | -6.8                       | 20.2                   | $\approx 0.0$ |
| $\text{D}_{232}^{nn}$ | $n_1 + n_2$ | 2.7                           | -6.8                       | 20.3                   | $\approx 0.0$ |
| $\text{D}_{233}^{nn}$ | $n_1 + n_2$ | 4.5                           | -6.8                       | 20.3                   | $\approx 0.0$ |
| $\text{D}_{234}^{nn}$ | $n_1 + n_2$ | 4.2                           | -6.8                       | 20.3                   | $\approx 0.0$ |
| $\text{D}_{235}^{nn}$ | $n_1 + n_2$ | 3.9                           | -6.9                       | 20.4                   | $\approx 0.0$ |
| $\text{D}_{236}^{nn}$ | $n_1 + n_2$ | 4.2                           | -6.9                       | 20.4                   | $\approx 0.0$ |
| $\text{D}_{237}^{nn}$ | $n_1 + n_2$ | 3.5                           | -6.9                       | 20.4                   | $\approx 0.0$ |
| $\text{D}_{238}^{nn}$ | $n_1 + n_2$ | 2.8                           | -7.0                       | 20.4                   | $\approx 0.0$ |
| $\text{D}_{239}^{nn}$ | $n_1 + n_2$ | 3.5                           | -7.0                       | 20.5                   | $\approx 0.0$ |
| $\text{D}_{240}^{nn}$ | $n_1 + n_2$ | 3.0                           | -7.1                       | 20.6                   | $\approx 0.0$ |
| $\text{D}_{241}^{nn}$ | $n_1 + n_2$ | 1.5                           | -7.5                       | 20.9                   | $\approx 0.0$ |
| $\text{D}_{242}^{nn}$ | $n_1 + n_2$ | 2.4                           | -7.6                       | 21.0                   | $\approx 0.0$ |
| $\text{D}_{243}^{nn}$ | $n_1 + n_2$ | 2.7                           | -7.9                       | 21.3                   | $\approx 0.0$ |
| $\text{D}_{244}^{nn}$ | $n_1 + n_2$ | 2.5                           | -7.9                       | 21.4                   | $\approx 0.0$ |

Table S2: Binding energies and energy differences in kcal mol<sup>-1</sup> for mixed dimers.  $\Delta\Delta G$ : Gibbs energies relative to the global minimum. We list electronic ( $BE_{B3LYP-D3}$ ) and Gibbs ( $BE_{Gibbs}$ ) binding energies corrected by the B3LYP-D3 vibrational ZPE (values within parentheses are calculated for the bare B3LYP functional with no dispersion corrections). Isomer populations  $\% \chi_i(G)$  derived from Boltzmann distributions of the Gibbs energies are also reported.

| Dimer         | Composition | $BE_{B3LYP-D3}$ | $BE_{Gibbs}$ | $\Delta\Delta G$ | $\% \chi_i(G)$ |
|---------------|-------------|-----------------|--------------|------------------|----------------|
| $D_1^{nz}$    | $n_1 + z_1$ | 28.2            | 15.5 (-7.6)  | $\approx 0.0$    | 44.9           |
| $D_2^{nz}$    | $n_2 + z_2$ | 29.7            | 17.9 (-0.5)  | 0.1              | 37.6           |
| $D_3^{nz}$    | $n_2 + z_2$ | 29.8            | 17.0 (-0.4)  | 1.1              | 7.4            |
| $D_4^{nz}$    | $n_2 + z_2$ | 29.8            | 17.0 (-2.5)  | 1.1              | 7.3            |
| $D_5^{nz}$    | $n_2 + z_2$ | 28.7            | 15.4         | 2.6              | 0.5            |
| $D_6^{nz}$    | $n_2 + z_2$ | 29.0            | 15.2         | 2.9              | 0.3            |
| $D_7^{nz}$    | $n_2 + z_2$ | 28.7            | 15.1         | 2.9              | 0.3            |
| $D_8^{nz}$    | $n_1 + z_1$ | 24.5            | 12.5         | 3.1              | 0.2            |
| $D_9^{nz}$    | $n_2 + z_2$ | 25.5            | 14.9         | 3.1              | 0.2            |
| $D_{10}^{nz}$ | $n_2 + z_2$ | 27.2            | 14.7         | 3.3              | 0.2            |
| $D_{11}^{nz}$ | $n_1 + z_1$ | 23.9            | 12.2         | 3.3              | 0.2            |
| $D_{12}^{nz}$ | $n_1 + z_1$ | 22.8            | 11.9         | 3.6              | 0.1            |
| $D_{13}^{nz}$ | $n_2 + z_2$ | 26.7            | 14.2         | 3.8              | 0.1            |
| $D_{14}^{nz}$ | $n_2 + z_2$ | 26.6            | 14.2         | 3.9              | 0.1            |
| $D_{15}^{nz}$ | $n_1 + z_1$ | 23.4            | 11.4         | 4.1              | $\approx 0.0$  |
| $D_{16}^{nz}$ | $n_1 + z_1$ | 22.9            | 11.4         | 4.2              | $\approx 0.0$  |
| $D_{17}^{nz}$ | $n_2 + z_2$ | 25.6            | 13.9         | 4.2              | $\approx 0.0$  |
| $D_{18}^{nz}$ | $n_2 + z_2$ | 25.4            | 13.9         | 4.2              | $\approx 0.0$  |
| $D_{19}^{nz}$ | $n_2 + z_2$ | 26.5            | 13.8         | 4.2              | $\approx 0.0$  |
| $D_{20}^{nz}$ | $n_1 + z_1$ | 23.8            | 11.3         | 4.2              | $\approx 0.0$  |
| $D_{21}^{nz}$ | $n_2 + z_2$ | 25.4            | 13.8         | 4.3              | $\approx 0.0$  |
| $D_{22}^{nz}$ | $n_2 + z_2$ | 25.8            | 13.8         | 4.3              | $\approx 0.0$  |
| $D_{23}^{nz}$ | $n_1 + z_1$ | 22.8            | 11.2         | 4.4              | $\approx 0.0$  |
| $D_{24}^{nz}$ | $n_1 + z_1$ | 23.2            | 11.1         | 4.5              | $\approx 0.0$  |
| $D_{25}^{nz}$ | $n_1 + z_1$ | 22.1            | 11.0         | 4.6              | $\approx 0.0$  |
| $D_{26}^{nz}$ | $n_1 + z_1$ | 22.7            | 10.9         | 4.6              | $\approx 0.0$  |
| $D_{27}^{nz}$ | $n_1 + z_1$ | 23.3            | 10.9         | 4.6              | $\approx 0.0$  |
| $D_{28}^{nz}$ | $n_2 + z_2$ | 26.3            | 13.4         | 4.7              | $\approx 0.0$  |
| $D_{29}^{nz}$ | $n_1 + z_1$ | 22.3            | 10.8         | 4.7              | $\approx 0.0$  |
| $D_{30}^{nz}$ | $n_1 + z_1$ | 23.5            | 10.8         | 4.7              | $\approx 0.0$  |
| $D_{31}^{nz}$ | $n_2 + z_2$ | 24.0            | 13.3         | 4.8              | $\approx 0.0$  |
| $D_{32}^{nz}$ | $n_2 + z_2$ | 23.8            | 13.2         | 4.8              | $\approx 0.0$  |
| $D_{33}^{nz}$ | $n_1 + z_1$ | 21.4            | 10.7         | 4.8              | $\approx 0.0$  |
| $D_{34}^{nz}$ | $n_1 + z_1$ | 22.3            | 10.7         | 4.9              | $\approx 0.0$  |
| $D_{35}^{nz}$ | $n_1 + z_1$ | 22.6            | 10.7         | 4.9              | $\approx 0.0$  |

| Dimer                         | Composition | BE <sub>B3LYP-D3</sub> | BE <sub>Gibbs</sub> | $\Delta\Delta G$ | % $\chi_i(G)$ |
|-------------------------------|-------------|------------------------|---------------------|------------------|---------------|
| D <sub>36</sub> <sup>nz</sup> | $n_2 + z_2$ | 23.4                   | 13.2                | 4.9              | $\approx 0.0$ |
| D <sub>37</sub> <sup>nz</sup> | $n_2 + z_2$ | 24.4                   | 13.1                | 5.0              | $\approx 0.0$ |
| D <sub>38</sub> <sup>nz</sup> | $n_2 + z_2$ | 25.6                   | 13.0                | 5.0              | $\approx 0.0$ |
| D <sub>39</sub> <sup>nz</sup> | $n_1 + z_1$ | 21.9                   | 10.5                | 5.0              | $\approx 0.0$ |
| D <sub>40</sub> <sup>nz</sup> | $n_1 + z_1$ | 21.6                   | 10.4                | 5.1              | $\approx 0.0$ |
| D <sub>41</sub> <sup>nz</sup> | $n_1 + z_1$ | 22.1                   | 10.4                | 5.1              | $\approx 0.0$ |
| D <sub>42</sub> <sup>nz</sup> | $n_1 + z_1$ | 22.2                   | 10.3                | 5.2              | $\approx 0.0$ |
| D <sub>43</sub> <sup>nz</sup> | $n_1 + z_1$ | 21.3                   | 10.3                | 5.2              | $\approx 0.0$ |
| D <sub>44</sub> <sup>nz</sup> | $n_1 + z_1$ | 21.9                   | 10.3                | 5.2              | $\approx 0.0$ |
| D <sub>45</sub> <sup>nz</sup> | $n_1 + z_1$ | 21.6                   | 10.1                | 5.4              | $\approx 0.0$ |
| D <sub>46</sub> <sup>nz</sup> | $n_2 + z_2$ | 25.3                   | 12.5                | 5.5              | $\approx 0.0$ |
| D <sub>47</sub> <sup>nz</sup> | $n_1 + z_1$ | 22.5                   | 9.9                 | 5.6              | $\approx 0.0$ |
| D <sub>48</sub> <sup>nz</sup> | $n_2 + z_2$ | 26.1                   | 12.3                | 5.7              | $\approx 0.0$ |
| D <sub>49</sub> <sup>nz</sup> | $n_2 + z_2$ | 24.3                   | 12.3                | 5.7              | $\approx 0.0$ |
| D <sub>50</sub> <sup>nz</sup> | $n_1 + z_1$ | 21.6                   | 9.8                 | 5.7              | $\approx 0.0$ |
| D <sub>51</sub> <sup>nz</sup> | $n_1 + z_1$ | 21.0                   | 9.8                 | 5.7              | $\approx 0.0$ |
| D <sub>52</sub> <sup>nz</sup> | $n_1 + z_1$ | 21.1                   | 9.8                 | 5.7              | $\approx 0.0$ |
| D <sub>53</sub> <sup>nz</sup> | $n_1 + z_1$ | 22.5                   | 9.6                 | 5.9              | $\approx 0.0$ |
| D <sub>54</sub> <sup>nz</sup> | $n_1 + z_1$ | 21.3                   | 9.6                 | 5.9              | $\approx 0.0$ |
| D <sub>55</sub> <sup>nz</sup> | $n_1 + z_1$ | 21.9                   | 9.6                 | 5.9              | $\approx 0.0$ |
| D <sub>56</sub> <sup>nz</sup> | $n_2 + z_2$ | 22.7                   | 12.0                | 6.0              | $\approx 0.0$ |
| D <sub>57</sub> <sup>nz</sup> | $n_1 + z_1$ | 20.4                   | 9.5                 | 6.0              | $\approx 0.0$ |
| D <sub>58</sub> <sup>nz</sup> | $n_2 + z_2$ | 25.0                   | 12.0                | 6.1              | $\approx 0.0$ |
| D <sub>59</sub> <sup>nz</sup> | $n_1 + z_1$ | 21.5                   | 9.5                 | 6.1              | $\approx 0.0$ |
| D <sub>60</sub> <sup>nz</sup> | $n_2 + z_2$ | 25.0                   | 12.0                | 6.1              | $\approx 0.0$ |
| D <sub>61</sub> <sup>nz</sup> | $n_1 + z_1$ | 21.4                   | 9.4                 | 6.1              | $\approx 0.0$ |
| D <sub>62</sub> <sup>nz</sup> | $n_1 + z_1$ | 21.5                   | 9.4                 | 6.2              | $\approx 0.0$ |
| D <sub>63</sub> <sup>nz</sup> | $n_2 + z_2$ | 24.0                   | 11.8                | 6.2              | $\approx 0.0$ |
| D <sub>64</sub> <sup>nz</sup> | $n_1 + z_1$ | 21.4                   | 9.3                 | 6.2              | $\approx 0.0$ |
| D <sub>65</sub> <sup>nz</sup> | $n_1 + z_1$ | 21.1                   | 9.3                 | 6.3              | $\approx 0.0$ |
| D <sub>66</sub> <sup>nz</sup> | $n_2 + z_2$ | 23.6                   | 11.7                | 6.3              | $\approx 0.0$ |
| D <sub>67</sub> <sup>nz</sup> | $n_1 + z_1$ | 19.0                   | 9.1                 | 6.5              | $\approx 0.0$ |
| D <sub>68</sub> <sup>nz</sup> | $n_1 + z_1$ | 20.4                   | 9.1                 | 6.5              | $\approx 0.0$ |
| D <sub>69</sub> <sup>nz</sup> | $n_2 + z_2$ | 24.3                   | 11.5                | 6.5              | $\approx 0.0$ |
| D <sub>70</sub> <sup>nz</sup> | $n_1 + z_1$ | 19.1                   | 9.0                 | 6.6              | $\approx 0.0$ |

| Dimer                                                  | Composition | BE <sub>B3LYP-D3</sub> | BE <sub>Gibbs</sub> | $\Delta\Delta G$ | % $\chi_i(G)$ |
|--------------------------------------------------------|-------------|------------------------|---------------------|------------------|---------------|
| D <sub>71</sub> <sup>n<sub>1</sub>z<sub>1</sub></sup>  | $n_1 + z_1$ | 20.3                   | 8.8                 | 6.7              | $\approx 0.0$ |
| D <sub>72</sub> <sup>n<sub>1</sub>z<sub>1</sub></sup>  | $n_1 + z_1$ | 21.3                   | 8.8                 | 6.8              | $\approx 0.0$ |
| D <sub>73</sub> <sup>n<sub>2</sub>z<sub>2</sub></sup>  | $n_2 + z_2$ | 22.2                   | 11.3                | 6.8              | $\approx 0.0$ |
| D <sub>74</sub> <sup>n<sub>2</sub>z<sub>2</sub></sup>  | $n_2 + z_2$ | 25.2                   | 11.2                | 6.8              | $\approx 0.0$ |
| D <sub>75</sub> <sup>n<sub>1</sub>z<sub>1</sub></sup>  | $n_1 + z_1$ | 20.1                   | 8.7                 | 6.9              | $\approx 0.0$ |
| D <sub>76</sub> <sup>n<sub>1</sub>z<sub>1</sub></sup>  | $n_1 + z_1$ | 20.1                   | 8.7                 | 6.9              | $\approx 0.0$ |
| D <sub>77</sub> <sup>n<sub>1</sub>z<sub>1</sub></sup>  | $n_1 + z_1$ | 21.0                   | 8.6                 | 6.9              | $\approx 0.0$ |
| D <sub>78</sub> <sup>n<sub>1</sub>z<sub>1</sub></sup>  | $n_1 + z_1$ | 19.2                   | 8.6                 | 6.9              | $\approx 0.0$ |
| D <sub>79</sub> <sup>n<sub>1</sub>z<sub>1</sub></sup>  | $n_1 + z_1$ | 17.9                   | 8.5                 | 7.0              | $\approx 0.0$ |
| D <sub>80</sub> <sup>n<sub>1</sub>z<sub>1</sub></sup>  | $n_1 + z_1$ | 20.1                   | 8.5                 | 7.0              | $\approx 0.0$ |
| D <sub>81</sub> <sup>n<sub>1</sub>z<sub>1</sub></sup>  | $n_1 + z_1$ | 19.3                   | 8.5                 | 7.1              | $\approx 0.0$ |
| D <sub>82</sub> <sup>n<sub>1</sub>z<sub>1</sub></sup>  | $n_1 + z_1$ | 19.1                   | 8.4                 | 7.1              | $\approx 0.0$ |
| D <sub>83</sub> <sup>n<sub>1</sub>z<sub>1</sub></sup>  | $n_1 + z_1$ | 18.5                   | 8.3                 | 7.2              | $\approx 0.0$ |
| D <sub>84</sub> <sup>n<sub>1</sub>z<sub>1</sub></sup>  | $n_1 + z_1$ | 18.6                   | 8.3                 | 7.2              | $\approx 0.0$ |
| D <sub>85</sub> <sup>n<sub>1</sub>z<sub>1</sub></sup>  | $n_1 + z_1$ | 18.4                   | 8.2                 | 7.3              | $\approx 0.0$ |
| D <sub>86</sub> <sup>n<sub>1</sub>z<sub>1</sub></sup>  | $n_1 + z_1$ | 19.4                   | 8.2                 | 7.3              | $\approx 0.0$ |
| D <sub>87</sub> <sup>n<sub>1</sub>z<sub>1</sub></sup>  | $n_1 + z_1$ | 19.0                   | 8.1                 | 7.5              | $\approx 0.0$ |
| D <sub>88</sub> <sup>n<sub>1</sub>z<sub>1</sub></sup>  | $n_1 + z_1$ | 19.7                   | 8.0                 | 7.6              | $\approx 0.0$ |
| D <sub>89</sub> <sup>n<sub>2</sub>z<sub>2</sub></sup>  | $n_2 + z_2$ | 22.3                   | 10.4                | 7.6              | $\approx 0.0$ |
| D <sub>90</sub> <sup>n<sub>1</sub>z<sub>1</sub></sup>  | $n_1 + z_1$ | 19.3                   | 7.9                 | 7.7              | $\approx 0.0$ |
| D <sub>91</sub> <sup>n<sub>2</sub>z<sub>2</sub></sup>  | $n_2 + z_2$ | 22.1                   | 10.3                | 7.8              | $\approx 0.0$ |
| D <sub>92</sub> <sup>n<sub>1</sub>z<sub>1</sub></sup>  | $n_1 + z_1$ | 19.4                   | 7.7                 | 7.8              | $\approx 0.0$ |
| D <sub>93</sub> <sup>n<sub>1</sub>z<sub>1</sub></sup>  | $n_1 + z_1$ | 19.5                   | 7.7                 | 7.8              | $\approx 0.0$ |
| D <sub>94</sub> <sup>n<sub>1</sub>z<sub>1</sub></sup>  | $n_1 + z_1$ | 20.4                   | 7.7                 | 7.9              | $\approx 0.0$ |
| D <sub>95</sub> <sup>n<sub>1</sub>z<sub>1</sub></sup>  | $n_1 + z_1$ | 18.4                   | 7.6                 | 7.9              | $\approx 0.0$ |
| D <sub>96</sub> <sup>n<sub>1</sub>z<sub>1</sub></sup>  | $n_1 + z_1$ | 19.4                   | 7.6                 | 8.0              | $\approx 0.0$ |
| D <sub>97</sub> <sup>n<sub>2</sub>z<sub>2</sub></sup>  | $n_2 + z_2$ | 22.3                   | 10.1                | 8.0              | $\approx 0.0$ |
| D <sub>98</sub> <sup>n<sub>1</sub>z<sub>1</sub></sup>  | $n_1 + z_1$ | 18.8                   | 7.5                 | 8.0              | $\approx 0.0$ |
| D <sub>99</sub> <sup>n<sub>1</sub>z<sub>1</sub></sup>  | $n_1 + z_1$ | 17.6                   | 7.2                 | 8.3              | $\approx 0.0$ |
| D <sub>100</sub> <sup>n<sub>2</sub>z<sub>2</sub></sup> | $n_2 + z_2$ | 22.4                   | 9.7                 | 8.4              | $\approx 0.0$ |
| D <sub>101</sub> <sup>n<sub>1</sub>z<sub>1</sub></sup> | $n_1 + z_1$ | 18.3                   | 7.2                 | 8.4              | $\approx 0.0$ |
| D <sub>102</sub> <sup>n<sub>1</sub>z<sub>1</sub></sup> | $n_1 + z_1$ | 18.1                   | 7.0                 | 8.5              | $\approx 0.0$ |
| D <sub>103</sub> <sup>n<sub>1</sub>z<sub>1</sub></sup> | $n_1 + z_1$ | 17.6                   | 7.0                 | 8.5              | $\approx 0.0$ |
| D <sub>104</sub> <sup>n<sub>1</sub>z<sub>1</sub></sup> | $n_1 + z_1$ | 18.6                   | 6.9                 | 8.6              | $\approx 0.0$ |
| D <sub>105</sub> <sup>n<sub>1</sub>z<sub>1</sub></sup> | $n_1 + z_1$ | 17.6                   | 6.8                 | 8.7              | $\approx 0.0$ |



| Dimer                 | Composition | $\text{BE}_{\text{B3LYP-D3}}$ | $\text{BE}_{\text{Gibbs}}$ | $\Delta\Delta\text{G}$ | $\%\chi_i(G)$ |
|-----------------------|-------------|-------------------------------|----------------------------|------------------------|---------------|
| $\text{D}_{106}^{nz}$ | $n_1 + z_1$ | 18.7                          | 6.8                        | 8.8                    | $\approx 0.0$ |
| $\text{D}_{107}^{nz}$ | $n_2 + z_2$ | 21.2                          | 9.2                        | 8.8                    | $\approx 0.0$ |
| $\text{D}_{108}^{nz}$ | $n_2 + z_2$ | 22.1                          | 9.2                        | 8.8                    | $\approx 0.0$ |
| $\text{D}_{109}^{nz}$ | $n_2 + z_2$ | 20.2                          | 9.2                        | 8.9                    | $\approx 0.0$ |
| $\text{D}_{110}^{nz}$ | $n_1 + z_1$ | 17.2                          | 6.4                        | 9.1                    | $\approx 0.0$ |
| $\text{D}_{111}^{nz}$ | $n_2 + z_2$ | 19.9                          | 8.9                        | 9.2                    | $\approx 0.0$ |
| $\text{D}_{112}^{nz}$ | $n_2 + z_2$ | 20.0                          | 8.8                        | 9.2                    | $\approx 0.0$ |
| $\text{D}_{113}^{nz}$ | $n_2 + z_2$ | 20.2                          | 8.8                        | 9.2                    | $\approx 0.0$ |
| $\text{D}_{114}^{nz}$ | $n_2 + z_2$ | 20.3                          | 8.8                        | 9.2                    | $\approx 0.0$ |
| $\text{D}_{115}^{nz}$ | $n_2 + z_2$ | 20.7                          | 8.8                        | 9.3                    | $\approx 0.0$ |
| $\text{D}_{116}^{nz}$ | $n_2 + z_2$ | 20.6                          | 8.8                        | 9.3                    | $\approx 0.0$ |
| $\text{D}_{117}^{nz}$ | $n_1 + z_1$ | 16.9                          | 6.3                        | 9.3                    | $\approx 0.0$ |
| $\text{D}_{118}^{nz}$ | $n_2 + z_2$ | 19.8                          | 8.6                        | 9.5                    | $\approx 0.0$ |
| $\text{D}_{119}^{nz}$ | $n_2 + z_2$ | 21.0                          | 8.4                        | 9.6                    | $\approx 0.0$ |
| $\text{D}_{120}^{nz}$ | $n_2 + z_2$ | 20.4                          | 8.3                        | 9.7                    | $\approx 0.0$ |
| $\text{D}_{121}^{nz}$ | $n_2 + z_2$ | 20.0                          | 8.1                        | 9.9                    | $\approx 0.0$ |
| $\text{D}_{122}^{nz}$ | $n_2 + z_2$ | 19.6                          | 8.0                        | 10.0                   | $\approx 0.0$ |
| $\text{D}_{123}^{nz}$ | $n_2 + z_2$ | 20.1                          | 8.0                        | 10.1                   | $\approx 0.0$ |
| $\text{D}_{124}^{nz}$ | $n_2 + z_2$ | 19.2                          | 7.9                        | 10.1                   | $\approx 0.0$ |
| $\text{D}_{125}^{nz}$ | $n_2 + z_2$ | 20.5                          | 7.9                        | 10.1                   | $\approx 0.0$ |
| $\text{D}_{126}^{nz}$ | $n_2 + z_2$ | 18.7                          | 7.9                        | 10.2                   | $\approx 0.0$ |
| $\text{D}_{127}^{nz}$ | $n_2 + z_2$ | 18.9                          | 7.9                        | 10.2                   | $\approx 0.0$ |
| $\text{D}_{128}^{nz}$ | $n_1 + z_1$ | 16.9                          | 5.3                        | 10.2                   | $\approx 0.0$ |
| $\text{D}_{129}^{nz}$ | $n_1 + z_1$ | 15.5                          | 5.3                        | 10.2                   | $\approx 0.0$ |
| $\text{D}_{130}^{nz}$ | $n_2 + z_2$ | 18.4                          | 7.7                        | 10.3                   | $\approx 0.0$ |
| $\text{D}_{131}^{nz}$ | $n_2 + z_2$ | 18.3                          | 7.6                        | 10.4                   | $\approx 0.0$ |
| $\text{D}_{132}^{nz}$ | $n_2 + z_2$ | 18.8                          | 7.6                        | 10.4                   | $\approx 0.0$ |
| $\text{D}_{133}^{nz}$ | $n_2 + z_2$ | 17.4                          | 7.6                        | 10.4                   | $\approx 0.0$ |
| $\text{D}_{134}^{nz}$ | $n_2 + z_2$ | 18.9                          | 7.5                        | 10.5                   | $\approx 0.0$ |
| $\text{D}_{135}^{nz}$ | $n_2 + z_2$ | 18.7                          | 7.4                        | 10.7                   | $\approx 0.0$ |
| $\text{D}_{136}^{nz}$ | $n_2 + z_2$ | 18.4                          | 7.3                        | 10.8                   | $\approx 0.0$ |
| $\text{D}_{137}^{nz}$ | $n_2 + z_2$ | 18.3                          | 7.2                        | 10.9                   | $\approx 0.0$ |
| $\text{D}_{138}^{nz}$ | $n_2 + z_2$ | 18.8                          | 7.1                        | 10.9                   | $\approx 0.0$ |
| $\text{D}_{139}^{nz}$ | $n_2 + z_2$ | 18.7                          | 7.1                        | 11.0                   | $\approx 0.0$ |
| $\text{D}_{140}^{nz}$ | $n_2 + z_2$ | 18.3                          | 7.0                        | 11.0                   | $\approx 0.0$ |

| Dimer                 | Composition | $\text{BE}_{\text{B3LYP-D3}}$ | $\text{BE}_{\text{Gibbs}}$ | $\Delta\Delta\text{G}$ | $\%\chi_i(G)$ |
|-----------------------|-------------|-------------------------------|----------------------------|------------------------|---------------|
| $\text{D}_{141}^{nz}$ | $n_2 + z_2$ | 16.9                          | 6.9                        | 11.1                   | $\approx 0.0$ |
| $\text{D}_{142}^{nz}$ | $n_2 + z_2$ | 18.4                          | 6.8                        | 11.2                   | $\approx 0.0$ |
| $\text{D}_{143}^{nz}$ | $n_2 + z_2$ | 17.9                          | 6.6                        | 11.5                   | $\approx 0.0$ |
| $\text{D}_{144}^{nz}$ | $n_2 + z_2$ | 16.8                          | 6.5                        | 11.6                   | $\approx 0.0$ |
| $\text{D}_{145}^{nz}$ | $n_2 + z_2$ | 18.0                          | 6.4                        | 11.6                   | $\approx 0.0$ |
| $\text{D}_{146}^{nz}$ | $n_2 + z_2$ | 17.7                          | 6.4                        | 11.7                   | $\approx 0.0$ |
| $\text{D}_{147}^{nz}$ | $n_2 + z_2$ | 16.6                          | 5.9                        | 12.1                   | $\approx 0.0$ |
| $\text{D}_{148}^{nz}$ | $n_2 + z_2$ | 16.3                          | 5.2                        | 12.9                   | $\approx 0.0$ |
| $\text{D}_{149}^{nz}$ | $n_2 + z_1$ | 14.3                          | 3.3                        | 14.4                   | $\approx 0.0$ |
| $\text{D}_{150}^{nz}$ | $n_2 + z_1$ | 11.9                          | 2.0                        | 15.7                   | $\approx 0.0$ |
| $\text{D}_{151}^{nz}$ | $n_2 + z_1$ | 13.6                          | 2.0                        | 15.8                   | $\approx 0.0$ |
| $\text{D}_{152}^{nz}$ | $n_2 + z_1$ | 13.8                          | 1.3                        | 16.4                   | $\approx 0.0$ |
| $\text{D}_{153}^{nz}$ | $n_2 + z_1$ | 11.1                          | 1.3                        | 16.4                   | $\approx 0.0$ |
| $\text{D}_{154}^{nz}$ | $n_2 + z_1$ | 13.8                          | 1.3                        | 16.5                   | $\approx 0.0$ |
| $\text{D}_{155}^{nz}$ | $n_2 + z_1$ | 11.2                          | 1.0                        | 16.8                   | $\approx 0.0$ |
| $\text{D}_{156}^{nz}$ | $n_2 + z_1$ | 12.2                          | 0.9                        | 16.9                   | $\approx 0.0$ |
| $\text{D}_{157}^{nz}$ | $n_2 + z_1$ | 12.3                          | 0.8                        | 16.9                   | $\approx 0.0$ |
| $\text{D}_{158}^{nz}$ | $n_2 + z_1$ | 11.1                          | 0.8                        | 16.9                   | $\approx 0.0$ |
| $\text{D}_{159}^{nz}$ | $n_2 + z_1$ | 11.9                          | 0.7                        | 17.0                   | $\approx 0.0$ |
| $\text{D}_{160}^{nz}$ | $n_2 + z_1$ | 11.9                          | 0.7                        | 17.1                   | $\approx 0.0$ |
| $\text{D}_{161}^{nz}$ | $n_2 + z_1$ | 10.9                          | 0.6                        | 17.1                   | $\approx 0.0$ |
| $\text{D}_{162}^{nz}$ | $n_2 + z_1$ | 10.9                          | 0.6                        | 17.1                   | $\approx 0.0$ |
| $\text{D}_{163}^{nz}$ | $n_1 + z_2$ | 9.5                           | -1.5                       | 17.4                   | $\approx 0.0$ |
| $\text{D}_{164}^{nz}$ | $n_1 + z_2$ | 7.6                           | -1.6                       | 17.4                   | $\approx 0.0$ |
| $\text{D}_{165}^{nz}$ | $n_2 + z_1$ | 11.5                          | 0.3                        | 17.4                   | $\approx 0.0$ |
| $\text{D}_{166}^{nz}$ | $n_1 + z_2$ | 10.0                          | -1.7                       | 17.5                   | $\approx 0.0$ |
| $\text{D}_{167}^{nz}$ | $n_1 + z_2$ | 9.5                           | -2.0                       | 17.9                   | $\approx 0.0$ |
| $\text{D}_{168}^{nz}$ | $n_1 + z_2$ | 7.4                           | -2.0                       | 17.9                   | $\approx 0.0$ |
| $\text{D}_{169}^{nz}$ | $n_2 + z_1$ | 11.2                          | -0.1                       | 17.9                   | $\approx 0.0$ |
| $\text{D}_{170}^{nz}$ | $n_2 + z_1$ | 10.0                          | -0.2                       | 17.9                   | $\approx 0.0$ |
| $\text{D}_{171}^{nz}$ | $n_1 + z_2$ | 8.0                           | -2.1                       | 17.9                   | $\approx 0.0$ |
| $\text{D}_{172}^{nz}$ | $n_1 + z_2$ | 7.5                           | -2.4                       | 18.3                   | $\approx 0.0$ |
| $\text{D}_{173}^{nz}$ | $n_1 + z_2$ | 8.3                           | -2.5                       | 18.3                   | $\approx 0.0$ |
| $\text{D}_{174}^{nz}$ | $n_2 + z_1$ | 11.5                          | -0.6                       | 18.4                   | $\approx 0.0$ |
| $\text{D}_{175}^{nz}$ | $n_1 + z_2$ | 7.3                           | -2.6                       | 18.4                   | $\approx 0.0$ |

| Dimer                                     | Composition | BE <sub>B3LYP-D3</sub> | BE <sub>Gibbs</sub> | $\Delta\Delta G$ | % $\chi_i(G)$ |
|-------------------------------------------|-------------|------------------------|---------------------|------------------|---------------|
| D <sub>176</sub> <sup>n<sub>z</sub></sup> | $n_1 + z_2$ | 8.2                    | -2.7                | 18.5             | $\approx 0.0$ |
| D <sub>177</sub> <sup>n<sub>z</sub></sup> | $n_1 + z_2$ | 8.5                    | -2.8                | 18.6             | $\approx 0.0$ |
| D <sub>178</sub> <sup>n<sub>z</sub></sup> | $n_1 + z_2$ | 8.3                    | -2.8                | 18.6             | $\approx 0.0$ |
| D <sub>179</sub> <sup>n<sub>z</sub></sup> | $n_1 + z_2$ | 7.9                    | -2.8                | 18.6             | $\approx 0.0$ |
| D <sub>180</sub> <sup>n<sub>z</sub></sup> | $n_2 + z_1$ | 9.9                    | -1.0                | 18.7             | $\approx 0.0$ |
| D <sub>181</sub> <sup>n<sub>z</sub></sup> | $n_2 + z_1$ | 10.3                   | -1.1                | 18.8             | $\approx 0.0$ |
| D <sub>182</sub> <sup>n<sub>z</sub></sup> | $n_1 + z_1$ | 8.0                    | -3.3                | 18.9             | $\approx 0.0$ |
| D <sub>183</sub> <sup>n<sub>z</sub></sup> | $n_1 + z_2$ | 8.0                    | -3.1                | 19.0             | $\approx 0.0$ |
| D <sub>184</sub> <sup>n<sub>z</sub></sup> | $n_2 + z_1$ | 10.3                   | -1.3                | 19.0             | $\approx 0.0$ |
| D <sub>185</sub> <sup>n<sub>z</sub></sup> | $n_2 + z_1$ | 9.8                    | -1.3                | 19.1             | $\approx 0.0$ |
| D <sub>186</sub> <sup>n<sub>z</sub></sup> | $n_1 + z_2$ | 8.2                    | -3.5                | 19.3             | $\approx 0.0$ |
| D <sub>187</sub> <sup>n<sub>z</sub></sup> | $n_1 + z_2$ | 7.9                    | -3.9                | 19.8             | $\approx 0.0$ |
| D <sub>188</sub> <sup>n<sub>z</sub></sup> | $n_2 + z_1$ | 9.0                    | -2.1                | 19.8             | $\approx 0.0$ |
| D <sub>189</sub> <sup>n<sub>z</sub></sup> | $n_1 + z_2$ | 5.7                    | -4.1                | 20.0             | $\approx 0.0$ |
| D <sub>190</sub> <sup>n<sub>z</sub></sup> | $n_2 + z_1$ | 9.1                    | -2.3                | 20.1             | $\approx 0.0$ |
| D <sub>191</sub> <sup>n<sub>z</sub></sup> | $n_1 + z_2$ | 7.3                    | -4.3                | 20.1             | $\approx 0.0$ |
| D <sub>192</sub> <sup>n<sub>z</sub></sup> | $n_1 + z_2$ | 7.1                    | -4.3                | 20.2             | $\approx 0.0$ |
| D <sub>193</sub> <sup>n<sub>z</sub></sup> | $n_1 + z_2$ | 7.9                    | -4.6                | 20.4             | $\approx 0.0$ |
| D <sub>194</sub> <sup>n<sub>z</sub></sup> | $n_1 + z_2$ | 7.0                    | -4.6                | 20.4             | $\approx 0.0$ |
| D <sub>195</sub> <sup>n<sub>z</sub></sup> | $n_2 + z_1$ | 8.6                    | -2.7                | 20.5             | $\approx 0.0$ |
| D <sub>196</sub> <sup>n<sub>z</sub></sup> | $n_1 + z_2$ | 5.7                    | -4.7                | 20.5             | $\approx 0.0$ |
| D <sub>197</sub> <sup>n<sub>z</sub></sup> | $n_1 + z_2$ | 5.7                    | -4.7                | 20.5             | $\approx 0.0$ |
| D <sub>198</sub> <sup>n<sub>z</sub></sup> | $n_1 + z_1$ | 5.9                    | -5.0                | 20.5             | $\approx 0.0$ |
| D <sub>199</sub> <sup>n<sub>z</sub></sup> | $n_2 + z_1$ | 9.7                    | -2.9                | 20.7             | $\approx 0.0$ |
| D <sub>200</sub> <sup>n<sub>z</sub></sup> | $n_1 + z_2$ | 5.1                    | -4.9                | 20.7             | $\approx 0.0$ |
| D <sub>201</sub> <sup>n<sub>z</sub></sup> | $n_1 + z_2$ | 5.4                    | -5.0                | 20.8             | $\approx 0.0$ |
| D <sub>202</sub> <sup>n<sub>z</sub></sup> | $n_1 + z_1$ | 5.9                    | -5.3                | 20.8             | $\approx 0.0$ |
| D <sub>203</sub> <sup>n<sub>z</sub></sup> | $n_1 + z_2$ | 5.8                    | -5.0                | 20.9             | $\approx 0.0$ |
| D <sub>204</sub> <sup>n<sub>z</sub></sup> | $n_1 + z_2$ | 6.1                    | -5.0                | 20.9             | $\approx 0.0$ |
| D <sub>205</sub> <sup>n<sub>z</sub></sup> | $n_1 + z_2$ | 5.4                    | -5.1                | 20.9             | $\approx 0.0$ |
| D <sub>206</sub> <sup>n<sub>z</sub></sup> | $n_1 + z_2$ | 6.3                    | -5.1                | 20.9             | $\approx 0.0$ |
| D <sub>207</sub> <sup>n<sub>z</sub></sup> | $n_1 + z_2$ | 6.5                    | -5.2                | 21.0             | $\approx 0.0$ |
| D <sub>208</sub> <sup>n<sub>z</sub></sup> | $n_1 + z_2$ | 6.6                    | -5.2                | 21.0             | $\approx 0.0$ |
| D <sub>209</sub> <sup>n<sub>z</sub></sup> | $n_1 + z_2$ | 4.7                    | -5.2                | 21.0             | $\approx 0.0$ |
| D <sub>210</sub> <sup>n<sub>z</sub></sup> | $n_1 + z_2$ | 5.4                    | -5.2                | 21.0             | $\approx 0.0$ |

| Dimer                 | Composition | $\text{BE}_{\text{B3LYP-D3}}$ | $\text{BE}_{\text{Gibbs}}$ | $\Delta\Delta\text{G}$ | $\%\chi_i(G)$ |
|-----------------------|-------------|-------------------------------|----------------------------|------------------------|---------------|
| $\text{D}_{211}^{nz}$ | $n_2 + z_1$ | 7.4                           | -3.3                       | 21.0                   | $\approx 0.0$ |
| $\text{D}_{212}^{nz}$ | $n_1 + z_2$ | 6.4                           | -5.2                       | 21.1                   | $\approx 0.0$ |
| $\text{D}_{213}^{nz}$ | $n_1 + z_2$ | 6.4                           | -5.3                       | 21.1                   | $\approx 0.0$ |
| $\text{D}_{214}^{nz}$ | $n_1 + z_2$ | 6.0                           | -5.4                       | 21.2                   | $\approx 0.0$ |
| $\text{D}_{215}^{nz}$ | $n_1 + z_2$ | 5.8                           | -5.4                       | 21.2                   | $\approx 0.0$ |
| $\text{D}_{216}^{nz}$ | $n_1 + z_2$ | 5.7                           | -5.4                       | 21.3                   | $\approx 0.0$ |
| $\text{D}_{217}^{nz}$ | $n_1 + z_2$ | 6.4                           | -5.4                       | 21.3                   | $\approx 0.0$ |
| $\text{D}_{218}^{nz}$ | $n_2 + z_1$ | 7.2                           | -3.6                       | 21.3                   | $\approx 0.0$ |
| $\text{D}_{219}^{nz}$ | $n_1 + z_2$ | 5.7                           | -5.5                       | 21.3                   | $\approx 0.0$ |
| $\text{D}_{220}^{nz}$ | $n_2 + z_1$ | 7.4                           | -3.6                       | 21.3                   | $\approx 0.0$ |
| $\text{D}_{221}^{nz}$ | $n_1 + z_2$ | 4.8                           | -5.5                       | 21.4                   | $\approx 0.0$ |
| $\text{D}_{222}^{nz}$ | $n_1 + z_2$ | 6.0                           | -5.5                       | 21.4                   | $\approx 0.0$ |
| $\text{D}_{223}^{nz}$ | $n_1 + z_2$ | 5.8                           | -5.6                       | 21.4                   | $\approx 0.0$ |
| $\text{D}_{224}^{nz}$ | $n_1 + z_2$ | 5.2                           | -5.6                       | 21.4                   | $\approx 0.0$ |
| $\text{D}_{225}^{nz}$ | $n_1 + z_2$ | 5.5                           | -5.6                       | 21.5                   | $\approx 0.0$ |
| $\text{D}_{226}^{nz}$ | $n_1 + z_2$ | 4.6                           | -5.6                       | 21.5                   | $\approx 0.0$ |
| $\text{D}_{227}^{nz}$ | $n_1 + z_2$ | 6.1                           | -5.6                       | 21.5                   | $\approx 0.0$ |
| $\text{D}_{228}^{nz}$ | $n_1 + z_2$ | 5.8                           | -5.7                       | 21.6                   | $\approx 0.0$ |
| $\text{D}_{229}^{nz}$ | $n_2 + z_1$ | 6.7                           | -3.8                       | 21.6                   | $\approx 0.0$ |
| $\text{D}_{230}^{nz}$ | $n_1 + z_2$ | 5.4                           | -5.8                       | 21.6                   | $\approx 0.0$ |
| $\text{D}_{231}^{nz}$ | $n_1 + z_2$ | 5.7                           | -5.8                       | 21.6                   | $\approx 0.0$ |
| $\text{D}_{232}^{nz}$ | $n_1 + z_2$ | 5.5                           | -5.9                       | 21.7                   | $\approx 0.0$ |
| $\text{D}_{233}^{nz}$ | $n_1 + z_2$ | 4.5                           | -5.9                       | 21.7                   | $\approx 0.0$ |
| $\text{D}_{234}^{nz}$ | $n_1 + z_2$ | 5.6                           | -5.9                       | 21.7                   | $\approx 0.0$ |
| $\text{D}_{235}^{nz}$ | $n_1 + z_2$ | 4.8                           | -5.9                       | 21.8                   | $\approx 0.0$ |
| $\text{D}_{236}^{nz}$ | $n_2 + z_1$ | 7.2                           | -4.0                       | 21.8                   | $\approx 0.0$ |
| $\text{D}_{237}^{nz}$ | $n_1 + z_2$ | 4.4                           | -6.0                       | 21.8                   | $\approx 0.0$ |
| $\text{D}_{238}^{nz}$ | $n_1 + z_2$ | 4.9                           | -6.0                       | 21.9                   | $\approx 0.0$ |
| $\text{D}_{239}^{nz}$ | $n_1 + z_2$ | 3.4                           | -6.0                       | 21.9                   | $\approx 0.0$ |
| $\text{D}_{240}^{nz}$ | $n_1 + z_2$ | 3.2                           | -6.1                       | 21.9                   | $\approx 0.0$ |
| $\text{D}_{241}^{nz}$ | $n_1 + z_2$ | 4.7                           | -6.1                       | 21.9                   | $\approx 0.0$ |
| $\text{D}_{242}^{nz}$ | $n_1 + z_2$ | 5.0                           | -6.1                       | 21.9                   | $\approx 0.0$ |
| $\text{D}_{243}^{nz}$ | $n_1 + z_2$ | 5.5                           | -6.1                       | 22.0                   | $\approx 0.0$ |
| $\text{D}_{244}^{nz}$ | $n_1 + z_2$ | 5.3                           | -6.2                       | 22.0                   | $\approx 0.0$ |
| $\text{D}_{245}^{nz}$ | $n_1 + z_2$ | 5.3                           | -6.2                       | 22.0                   | $\approx 0.0$ |

| Dimer                 | Composition | $\text{BE}_{\text{B3LYP-D3}}$ | $\text{BE}_{\text{Gibbs}}$ | $\Delta\Delta\text{G}$ | $\%\chi_i(G)$ |
|-----------------------|-------------|-------------------------------|----------------------------|------------------------|---------------|
| $\text{D}_{246}^{nz}$ | $n_2 + z_1$ | 7.0                           | -4.3                       | 22.0                   | $\approx 0.0$ |
| $\text{D}_{247}^{nz}$ | $n_1 + z_2$ | 4.9                           | -6.3                       | 22.1                   | $\approx 0.0$ |
| $\text{D}_{248}^{nz}$ | $n_1 + z_2$ | 2.9                           | -6.3                       | 22.1                   | $\approx 0.0$ |
| $\text{D}_{249}^{nz}$ | $n_1 + z_2$ | 3.7                           | -6.3                       | 22.1                   | $\approx 0.0$ |
| $\text{D}_{250}^{nz}$ | $n_1 + z_2$ | 4.8                           | -6.3                       | 22.1                   | $\approx 0.0$ |
| $\text{D}_{251}^{nz}$ | $n_2 + z_1$ | 6.6                           | -4.4                       | 22.2                   | $\approx 0.0$ |
| $\text{D}_{252}^{nz}$ | $n_1 + z_2$ | 4.2                           | -6.4                       | 22.2                   | $\approx 0.0$ |
| $\text{D}_{253}^{nz}$ | $n_1 + z_2$ | 5.2                           | -6.4                       | 22.2                   | $\approx 0.0$ |
| $\text{D}_{254}^{nz}$ | $n_1 + z_2$ | 4.6                           | -6.5                       | 22.3                   | $\approx 0.0$ |
| $\text{D}_{255}^{nz}$ | $n_1 + z_2$ | 2.8                           | -6.5                       | 22.4                   | $\approx 0.0$ |
| $\text{D}_{256}^{nz}$ | $n_1 + z_2$ | 5.0                           | -6.6                       | 22.4                   | $\approx 0.0$ |
| $\text{D}_{257}^{nz}$ | $n_1 + z_2$ | 3.4                           | -6.6                       | 22.4                   | $\approx 0.0$ |
| $\text{D}_{258}^{nz}$ | $n_2 + z_1$ | 6.1                           | -4.7                       | 22.5                   | $\approx 0.0$ |
| $\text{D}_{259}^{nz}$ | $n_1 + z_2$ | 4.1                           | -6.7                       | 22.6                   | $\approx 0.0$ |
| $\text{D}_{260}^{nz}$ | $n_1 + z_2$ | 2.5                           | -6.8                       | 22.6                   | $\approx 0.0$ |
| $\text{D}_{261}^{nz}$ | $n_1 + z_2$ | 2.4                           | -6.8                       | 22.7                   | $\approx 0.0$ |
| $\text{D}_{262}^{nz}$ | $n_1 + z_2$ | 2.9                           | -6.8                       | 22.7                   | $\approx 0.0$ |
| $\text{D}_{263}^{nz}$ | $n_1 + z_2$ | 5.2                           | -6.9                       | 22.7                   | $\approx 0.0$ |
| $\text{D}_{264}^{nz}$ | $n_1 + z_2$ | 2.7                           | -6.9                       | 22.7                   | $\approx 0.0$ |
| $\text{D}_{265}^{nz}$ | $n_2 + z_1$ | 5.2                           | -5.0                       | 22.7                   | $\approx 0.0$ |
| $\text{D}_{266}^{nz}$ | $n_1 + z_2$ | 4.5                           | -7.0                       | 22.8                   | $\approx 0.0$ |
| $\text{D}_{267}^{nz}$ | $n_1 + z_2$ | 3.9                           | -7.0                       | 22.8                   | $\approx 0.0$ |
| $\text{D}_{268}^{nz}$ | $n_1 + z_2$ | 4.2                           | -7.1                       | 22.9                   | $\approx 0.0$ |
| $\text{D}_{269}^{nz}$ | $n_1 + z_2$ | 3.7                           | -7.1                       | 22.9                   | $\approx 0.0$ |
| $\text{D}_{270}^{nz}$ | $n_2 + z_1$ | 5.7                           | -5.2                       | 23.0                   | $\approx 0.0$ |
| $\text{D}_{271}^{nz}$ | $n_2 + z_1$ | 6.1                           | -5.2                       | 23.0                   | $\approx 0.0$ |
| $\text{D}_{272}^{nz}$ | $n_1 + z_2$ | 3.1                           | -7.2                       | 23.0                   | $\approx 0.0$ |
| $\text{D}_{273}^{nz}$ | $n_2 + z_1$ | 5.5                           | -5.3                       | 23.1                   | $\approx 0.0$ |
| $\text{D}_{274}^{nz}$ | $n_2 + z_1$ | 5.0                           | -5.3                       | 23.1                   | $\approx 0.0$ |
| $\text{D}_{275}^{nz}$ | $n_2 + z_1$ | 5.5                           | -5.4                       | 23.1                   | $\approx 0.0$ |
| $\text{D}_{276}^{nz}$ | $n_1 + z_2$ | 3.3                           | -7.3                       | 23.2                   | $\approx 0.0$ |
| $\text{D}_{277}^{nz}$ | $n_2 + z_1$ | 5.2                           | -5.4                       | 23.2                   | $\approx 0.0$ |
| $\text{D}_{278}^{nz}$ | $n_2 + z_1$ | 5.5                           | -5.5                       | 23.2                   | $\approx 0.0$ |
| $\text{D}_{279}^{nz}$ | $n_2 + z_1$ | 5.9                           | -5.5                       | 23.2                   | $\approx 0.0$ |
| $\text{D}_{280}^{nz}$ | $n_1 + z_2$ | 4.4                           | -7.4                       | 23.2                   | $\approx 0.0$ |

| Dimer                 | Composition | $\text{BE}_{\text{B3LYP-D3}}$ | $\text{BE}_{\text{Gibbs}}$ | $\Delta\Delta\text{G}$ | $\%\chi_i(G)$ |
|-----------------------|-------------|-------------------------------|----------------------------|------------------------|---------------|
| $\text{D}_{281}^{nz}$ | $n_1 + z_2$ | 3.1                           | -7.4                       | 23.3                   | $\approx 0.0$ |
| $\text{D}_{282}^{nz}$ | $n_2 + z_1$ | 5.5                           | -5.5                       | 23.3                   | $\approx 0.0$ |
| $\text{D}_{283}^{nz}$ | $n_2 + z_1$ | 4.6                           | -5.6                       | 23.3                   | $\approx 0.0$ |
| $\text{D}_{284}^{nz}$ | $n_1 + z_2$ | 3.6                           | -7.5                       | 23.3                   | $\approx 0.0$ |
| $\text{D}_{285}^{nz}$ | $n_1 + z_2$ | 2.3                           | -7.5                       | 23.3                   | $\approx 0.0$ |
| $\text{D}_{286}^{nz}$ | $n_2 + z_1$ | 5.5                           | -5.6                       | 23.4                   | $\approx 0.0$ |
| $\text{D}_{287}^{nz}$ | $n_2 + z_1$ | 5.9                           | -5.6                       | 23.4                   | $\approx 0.0$ |
| $\text{D}_{288}^{nz}$ | $n_2 + z_1$ | 4.7                           | -5.6                       | 23.4                   | $\approx 0.0$ |
| $\text{D}_{289}^{nz}$ | $n_2 + z_1$ | 5.1                           | -5.7                       | 23.4                   | $\approx 0.0$ |
| $\text{D}_{290}^{nz}$ | $n_2 + z_1$ | 5.8                           | -5.7                       | 23.4                   | $\approx 0.0$ |
| $\text{D}_{291}^{nz}$ | $n_2 + z_1$ | 3.5                           | -5.7                       | 23.5                   | $\approx 0.0$ |
| $\text{D}_{292}^{nz}$ | $n_2 + z_1$ | 4.3                           | -5.7                       | 23.5                   | $\approx 0.0$ |
| $\text{D}_{293}^{nz}$ | $n_2 + z_1$ | 4.4                           | -5.8                       | 23.6                   | $\approx 0.0$ |
| $\text{D}_{294}^{nz}$ | $n_2 + z_1$ | 3.9                           | -5.9                       | 23.7                   | $\approx 0.0$ |
| $\text{D}_{295}^{nz}$ | $n_2 + z_1$ | 4.0                           | -6.0                       | 23.8                   | $\approx 0.0$ |
| $\text{D}_{296}^{nz}$ | $n_2 + z_1$ | 4.6                           | -6.0                       | 23.8                   | $\approx 0.0$ |
| $\text{D}_{297}^{nz}$ | $n_2 + z_1$ | 4.8                           | -6.1                       | 23.9                   | $\approx 0.0$ |
| $\text{D}_{298}^{nz}$ | $n_2 + z_1$ | 4.2                           | -6.1                       | 23.9                   | $\approx 0.0$ |
| $\text{D}_{299}^{nz}$ | $n_1 + z_2$ | 1.3                           | -8.0                       | 23.9                   | $\approx 0.0$ |
| $\text{D}_{300}^{nz}$ | $n_2 + z_1$ | 3.0                           | -6.2                       | 23.9                   | $\approx 0.0$ |
| $\text{D}_{301}^{nz}$ | $n_2 + z_1$ | 5.5                           | -6.2                       | 24.0                   | $\approx 0.0$ |
| $\text{D}_{302}^{nz}$ | $n_1 + z_2$ | 2.2                           | -8.1                       | 24.0                   | $\approx 0.0$ |
| $\text{D}_{303}^{nz}$ | $n_2 + z_1$ | 3.9                           | -6.2                       | 24.0                   | $\approx 0.0$ |
| $\text{D}_{304}^{nz}$ | $n_2 + z_1$ | 4.2                           | -6.3                       | 24.0                   | $\approx 0.0$ |
| $\text{D}_{305}^{nz}$ | $n_2 + z_1$ | 4.9                           | -6.3                       | 24.1                   | $\approx 0.0$ |
| $\text{D}_{306}^{nz}$ | $n_2 + z_1$ | 2.9                           | -6.3                       | 24.1                   | $\approx 0.0$ |
| $\text{D}_{307}^{nz}$ | $n_2 + z_1$ | 4.9                           | -6.5                       | 24.2                   | $\approx 0.0$ |
| $\text{D}_{308}^{nz}$ | $n_1 + z_2$ | 2.4                           | -8.4                       | 24.3                   | $\approx 0.0$ |
| $\text{D}_{309}^{nz}$ | $n_2 + z_1$ | 3.5                           | -6.5                       | 24.3                   | $\approx 0.0$ |
| $\text{D}_{310}^{nz}$ | $n_1 + z_2$ | 2.0                           | -8.5                       | 24.4                   | $\approx 0.0$ |
| $\text{D}_{311}^{nz}$ | $n_2 + z_1$ | 3.5                           | -6.7                       | 24.5                   | $\approx 0.0$ |
| $\text{D}_{312}^{nz}$ | $n_2 + z_1$ | 3.1                           | -6.8                       | 24.6                   | $\approx 0.0$ |
| $\text{D}_{313}^{nz}$ | $n_2 + z_1$ | 4.5                           | -6.8                       | 24.6                   | $\approx 0.0$ |
| $\text{D}_{314}^{nz}$ | $n_2 + z_1$ | 4.8                           | -7.0                       | 24.8                   | $\approx 0.0$ |
| $\text{D}_{315}^{nz}$ | $n_2 + z_1$ | 4.1                           | -7.1                       | 24.8                   | $\approx 0.0$ |

| <b>Dimer</b>                   | Composition | <b>BE</b> <sub>B3LYP-D3</sub> | <b>BE</b> <sub>Gibbs</sub> | $\Delta\Delta\mathbf{G}$ | $\%\chi_i(G)$ |
|--------------------------------|-------------|-------------------------------|----------------------------|--------------------------|---------------|
| D <sub>316</sub> <sup>nz</sup> | $n_1 + z_2$ | 1.5                           | -9.7                       | 25.5                     | $\approx 0.0$ |

Table S3: Binding energies and energy differences in kcal mol<sup>-1</sup> for zwitterionic dimers.  $\Delta\Delta G$ : Gibbs energies relative to the global minimum. We list electronic ( $BE_{B3LYP-D3}$ ) and Gibbs ( $BE_{Gibbs}$ ) binding energies corrected by the B3LYP-D3 vibrational ZPE (values within parentheses are calculated for the bare B3LYP functional with no dispersion corrections). Isomer populations  $\% \chi_i(G)$  derived from Boltzmann distributions of the Gibbs energies are also reported.

| Dimer                         | Composition | $BE_{B3LYP-D3}$ | $BE_{Gibbs}$ | $\Delta\Delta G$ | $\% \chi_i(G)$ |
|-------------------------------|-------------|-----------------|--------------|------------------|----------------|
| D <sub>1</sub> <sup>zz</sup>  | $z_2 + z_2$ | 35.2            | 21.8 (-0.2)  | $\approx 0.0$    | 51.8           |
| D <sub>2</sub> <sup>zz</sup>  | $z_1 + z_1$ | 31.1            | 20.5 (-0.9)  | 0.7              | 15.1           |
| D <sub>3</sub> <sup>zz</sup>  | $z_2 + z_2$ | 33.6            | 20.6 (-1.2)  | 1.1              | 7.6            |
| D <sub>4</sub> <sup>zz</sup>  | $z_1 + z_2$ | 32.5            | 20.2 (-0.5)  | 1.3              | 5.6            |
| D <sub>5</sub> <sup>zz</sup>  | $z_1 + z_2$ | 32.6            | 20.0         | 1.5              | 4.0            |
| D <sub>6</sub> <sup>zz</sup>  | $z_1 + z_2$ | 33.1            | 19.9         | 1.6              | 3.5            |
| D <sub>7</sub> <sup>zz</sup>  | $z_2 + z_2$ | 32.7            | 20.0         | 1.8              | 2.4            |
| D <sub>8</sub> <sup>zz</sup>  | $z_1 + z_2$ | 31.4            | 19.5         | 2.0              | 1.9            |
| D <sub>9</sub> <sup>zz</sup>  | $z_1 + z_2$ | 32.0            | 19.5         | 2.0              | 1.8            |
| D <sub>10</sub> <sup>zz</sup> | $z_2 + z_2$ | 32.8            | 19.7         | 2.1              | 1.5            |
| D <sub>11</sub> <sup>zz</sup> | $z_2 + z_2$ | 32.1            | 19.6         | 2.2              | 1.4            |
| D <sub>12</sub> <sup>zz</sup> | $z_2 + z_2$ | 31.6            | 19.5         | 2.2              | 1.2            |
| D <sub>13</sub> <sup>zz</sup> | $z_1 + z_2$ | 31.5            | 19.2         | 2.3              | 1.0            |
| D <sub>14</sub> <sup>zz</sup> | $z_1 + z_2$ | 31.9            | 18.7         | 2.8              | 0.4            |
| D <sub>15</sub> <sup>zz</sup> | $z_1 + z_2$ | 29.5            | 17.9         | 3.6              | 0.1            |
| D <sub>16</sub> <sup>zz</sup> | $z_1 + z_2$ | 29.5            | 17.7         | 3.8              | 0.1            |
| D <sub>17</sub> <sup>zz</sup> | $z_2 + z_2$ | 30.1            | 17.9         | 3.8              | 0.1            |
| D <sub>18</sub> <sup>zz</sup> | $z_2 + z_2$ | 30.0            | 17.7         | 4.1              | 0.1            |
| D <sub>19</sub> <sup>zz</sup> | $z_1 + z_1$ | 29.2            | 17.1         | 4.1              | $\approx 0.0$  |
| D <sub>20</sub> <sup>zz</sup> | $z_2 + z_2$ | 30.1            | 17.5         | 4.2              | $\approx 0.0$  |
| D <sub>21</sub> <sup>zz</sup> | $z_2 + z_2$ | 30.1            | 17.5         | 4.2              | $\approx 0.0$  |
| D <sub>22</sub> <sup>zz</sup> | $z_1 + z_1$ | 29.3            | 16.7         | 4.5              | $\approx 0.0$  |
| D <sub>23</sub> <sup>zz</sup> | $z_1 + z_2$ | 29.2            | 17.0         | 4.5              | $\approx 0.0$  |
| D <sub>24</sub> <sup>zz</sup> | $z_1 + z_2$ | 28.6            | 16.8         | 4.6              | $\approx 0.0$  |
| D <sub>25</sub> <sup>zz</sup> | $z_1 + z_1$ | 27.8            | 16.5         | 4.7              | $\approx 0.0$  |
| D <sub>26</sub> <sup>zz</sup> | $z_1 + z_2$ | 28.1            | 16.7         | 4.8              | $\approx 0.0$  |
| D <sub>27</sub> <sup>zz</sup> | $z_1 + z_2$ | 28.9            | 16.6         | 4.8              | $\approx 0.0$  |
| D <sub>28</sub> <sup>zz</sup> | $z_2 + z_2$ | 30.1            | 16.6         | 5.1              | $\approx 0.0$  |
| D <sub>29</sub> <sup>zz</sup> | $z_1 + z_1$ | 28.1            | 16.0         | 5.2              | $\approx 0.0$  |
| D <sub>30</sub> <sup>zz</sup> | $z_1 + z_2$ | 29.5            | 16.2         | 5.3              | $\approx 0.0$  |
| D <sub>31</sub> <sup>zz</sup> | $z_1 + z_2$ | 28.9            | 16.2         | 5.3              | $\approx 0.0$  |
| D <sub>32</sub> <sup>zz</sup> | $z_2 + z_2$ | 29.2            | 16.5         | 5.3              | $\approx 0.0$  |
| D <sub>33</sub> <sup>zz</sup> | $z_1 + z_2$ | 28.0            | 16.2         | 5.3              | $\approx 0.0$  |
| D <sub>34</sub> <sup>zz</sup> | $z_1 + z_2$ | 27.2            | 16.2         | 5.3              | $\approx 0.0$  |
| D <sub>35</sub> <sup>zz</sup> | $z_1 + z_1$ | 28.1            | 15.8         | 5.4              | $\approx 0.0$  |



| Dimer                | Composition | $\text{BE}_{\text{B3LYP-D3}}$ | $\text{BE}_{\text{Gibbs}}$ | $\Delta\Delta\text{G}$ | $\% \chi_i(G)$ |
|----------------------|-------------|-------------------------------|----------------------------|------------------------|----------------|
| $\text{D}_{36}^{zz}$ | $z_1 + z_2$ | 27.7                          | 16.1                       | 5.4                    | $\approx 0.0$  |
| $\text{D}_{37}^{zz}$ | $z_1 + z_1$ | 27.1                          | 15.7                       | 5.5                    | $\approx 0.0$  |
| $\text{D}_{38}^{zz}$ | $z_1 + z_1$ | 27.7                          | 15.7                       | 5.5                    | $\approx 0.0$  |
| $\text{D}_{39}^{zz}$ | $z_1 + z_1$ | 26.8                          | 15.7                       | 5.5                    | $\approx 0.0$  |
| $\text{D}_{40}^{zz}$ | $z_1 + z_1$ | 27.9                          | 15.6                       | 5.6                    | $\approx 0.0$  |
| $\text{D}_{41}^{zz}$ | $z_1 + z_2$ | 28.1                          | 15.8                       | 5.7                    | $\approx 0.0$  |
| $\text{D}_{42}^{zz}$ | $z_1 + z_2$ | 27.8                          | 15.7                       | 5.8                    | $\approx 0.0$  |
| $\text{D}_{43}^{zz}$ | $z_1 + z_2$ | 28.7                          | 15.7                       | 5.8                    | $\approx 0.0$  |
| $\text{D}_{44}^{zz}$ | $z_1 + z_1$ | 27.6                          | 15.3                       | 5.9                    | $\approx 0.0$  |
| $\text{D}_{45}^{zz}$ | $z_1 + z_1$ | 26.6                          | 15.3                       | 5.9                    | $\approx 0.0$  |
| $\text{D}_{46}^{zz}$ | $z_1 + z_2$ | 27.5                          | 15.5                       | 6.0                    | $\approx 0.0$  |
| $\text{D}_{47}^{zz}$ | $z_1 + z_2$ | 26.1                          | 15.4                       | 6.1                    | $\approx 0.0$  |
| $\text{D}_{48}^{zz}$ | $z_1 + z_1$ | 27.6                          | 15.1                       | 6.1                    | $\approx 0.0$  |
| $\text{D}_{49}^{zz}$ | $z_1 + z_1$ | 27.3                          | 15.0                       | 6.2                    | $\approx 0.0$  |
| $\text{D}_{50}^{zz}$ | $z_1 + z_2$ | 27.6                          | 15.3                       | 6.2                    | $\approx 0.0$  |
| $\text{D}_{51}^{zz}$ | $z_1 + z_2$ | 26.1                          | 15.2                       | 6.3                    | $\approx 0.0$  |
| $\text{D}_{52}^{zz}$ | $z_1 + z_1$ | 25.9                          | 14.8                       | 6.4                    | $\approx 0.0$  |
| $\text{D}_{53}^{zz}$ | $z_1 + z_1$ | 26.3                          | 14.8                       | 6.4                    | $\approx 0.0$  |
| $\text{D}_{54}^{zz}$ | $z_1 + z_2$ | 26.1                          | 15.0                       | 6.5                    | $\approx 0.0$  |
| $\text{D}_{55}^{zz}$ | $z_1 + z_1$ | 27.6                          | 14.7                       | 6.5                    | $\approx 0.0$  |
| $\text{D}_{56}^{zz}$ | $z_1 + z_1$ | 25.8                          | 14.6                       | 6.6                    | $\approx 0.0$  |
| $\text{D}_{57}^{zz}$ | $z_1 + z_2$ | 26.4                          | 14.9                       | 6.6                    | $\approx 0.0$  |
| $\text{D}_{58}^{zz}$ | $z_1 + z_2$ | 26.5                          | 14.8                       | 6.7                    | $\approx 0.0$  |
| $\text{D}_{59}^{zz}$ | $z_1 + z_1$ | 25.8                          | 14.5                       | 6.7                    | $\approx 0.0$  |
| $\text{D}_{60}^{zz}$ | $z_1 + z_2$ | 26.4                          | 14.8                       | 6.7                    | $\approx 0.0$  |
| $\text{D}_{61}^{zz}$ | $z_1 + z_2$ | 26.0                          | 14.8                       | 6.7                    | $\approx 0.0$  |
| $\text{D}_{62}^{zz}$ | $z_2 + z_2$ | 26.7                          | 15.0                       | 6.7                    | $\approx 0.0$  |
| $\text{D}_{63}^{zz}$ | $z_1 + z_1$ | 26.5                          | 14.4                       | 6.8                    | $\approx 0.0$  |
| $\text{D}_{64}^{zz}$ | $z_1 + z_2$ | 25.5                          | 14.6                       | 6.9                    | $\approx 0.0$  |
| $\text{D}_{65}^{zz}$ | $z_1 + z_2$ | 26.3                          | 14.6                       | 6.9                    | $\approx 0.0$  |
| $\text{D}_{66}^{zz}$ | $z_1 + z_2$ | 25.7                          | 14.6                       | 6.9                    | $\approx 0.0$  |
| $\text{D}_{67}^{zz}$ | $z_1 + z_2$ | 26.7                          | 14.6                       | 6.9                    | $\approx 0.0$  |
| $\text{D}_{68}^{zz}$ | $z_1 + z_1$ | 24.8                          | 14.3                       | 6.9                    | $\approx 0.0$  |
| $\text{D}_{69}^{zz}$ | $z_2 + z_2$ | 26.6                          | 14.8                       | 6.9                    | $\approx 0.0$  |
| $\text{D}_{70}^{zz}$ | $z_2 + z_2$ | 26.6                          | 14.8                       | 7.0                    | $\approx 0.0$  |

| Dimer                 | Composition | $\text{BE}_{\text{B3LYP-D3}}$ | $\text{BE}_{\text{Gibbs}}$ | $\Delta\Delta\text{G}$ | $\%\chi_i(G)$ |
|-----------------------|-------------|-------------------------------|----------------------------|------------------------|---------------|
| $\text{D}_{71}^{zz}$  | $z_1 + z_2$ | 26.0                          | 14.5                       | 7.0                    | $\approx 0.0$ |
| $\text{D}_{72}^{zz}$  | $z_1 + z_2$ | 26.4                          | 14.5                       | 7.0                    | $\approx 0.0$ |
| $\text{D}_{73}^{zz}$  | $z_1 + z_2$ | 25.6                          | 14.4                       | 7.1                    | $\approx 0.0$ |
| $\text{D}_{74}^{zz}$  | $z_1 + z_1$ | 27.1                          | 14.1                       | 7.1                    | $\approx 0.0$ |
| $\text{D}_{75}^{zz}$  | $z_1 + z_2$ | 25.6                          | 14.4                       | 7.1                    | $\approx 0.0$ |
| $\text{D}_{76}^{zz}$  | $z_2 + z_2$ | 27.1                          | 14.6                       | 7.2                    | $\approx 0.0$ |
| $\text{D}_{77}^{zz}$  | $z_1 + z_2$ | 25.8                          | 14.2                       | 7.3                    | $\approx 0.0$ |
| $\text{D}_{78}^{zz}$  | $z_1 + z_2$ | 25.7                          | 14.2                       | 7.3                    | $\approx 0.0$ |
| $\text{D}_{79}^{zz}$  | $z_1 + z_2$ | 25.7                          | 14.2                       | 7.3                    | $\approx 0.0$ |
| $\text{D}_{80}^{zz}$  | $z_2 + z_2$ | 25.2                          | 14.5                       | 7.3                    | $\approx 0.0$ |
| $\text{D}_{81}^{zz}$  | $z_1 + z_2$ | 25.9                          | 14.2                       | 7.3                    | $\approx 0.0$ |
| $\text{D}_{82}^{zz}$  | $z_2 + z_2$ | 26.0                          | 14.4                       | 7.3                    | $\approx 0.0$ |
| $\text{D}_{83}^{zz}$  | $z_1 + z_1$ | 25.4                          | 13.9                       | 7.3                    | $\approx 0.0$ |
| $\text{D}_{84}^{zz}$  | $z_1 + z_2$ | 25.7                          | 14.1                       | 7.3                    | $\approx 0.0$ |
| $\text{D}_{85}^{zz}$  | $z_1 + z_2$ | 25.9                          | 14.1                       | 7.3                    | $\approx 0.0$ |
| $\text{D}_{86}^{zz}$  | $z_2 + z_2$ | 27.2                          | 14.4                       | 7.4                    | $\approx 0.0$ |
| $\text{D}_{87}^{zz}$  | $z_1 + z_1$ | 26.8                          | 13.7                       | 7.5                    | $\approx 0.0$ |
| $\text{D}_{88}^{zz}$  | $z_2 + z_2$ | 26.9                          | 14.3                       | 7.5                    | $\approx 0.0$ |
| $\text{D}_{89}^{zz}$  | $z_2 + z_2$ | 26.4                          | 14.3                       | 7.5                    | $\approx 0.0$ |
| $\text{D}_{90}^{zz}$  | $z_2 + z_2$ | 26.1                          | 14.2                       | 7.5                    | $\approx 0.0$ |
| $\text{D}_{91}^{zz}$  | $z_1 + z_2$ | 26.3                          | 13.9                       | 7.6                    | $\approx 0.0$ |
| $\text{D}_{92}^{zz}$  | $z_1 + z_2$ | 25.4                          | 13.9                       | 7.6                    | $\approx 0.0$ |
| $\text{D}_{93}^{zz}$  | $z_1 + z_2$ | 26.0                          | 13.9                       | 7.6                    | $\approx 0.0$ |
| $\text{D}_{94}^{zz}$  | $z_1 + z_2$ | 25.1                          | 13.8                       | 7.7                    | $\approx 0.0$ |
| $\text{D}_{95}^{zz}$  | $z_2 + z_2$ | 26.3                          | 14.1                       | 7.7                    | $\approx 0.0$ |
| $\text{D}_{96}^{zz}$  | $z_2 + z_2$ | 25.1                          | 14.0                       | 7.7                    | $\approx 0.0$ |
| $\text{D}_{97}^{zz}$  | $z_2 + z_2$ | 26.2                          | 14.0                       | 7.8                    | $\approx 0.0$ |
| $\text{D}_{98}^{zz}$  | $z_2 + z_2$ | 26.5                          | 13.8                       | 7.9                    | $\approx 0.0$ |
| $\text{D}_{99}^{zz}$  | $z_2 + z_2$ | 26.4                          | 13.8                       | 8.0                    | $\approx 0.0$ |
| $\text{D}_{100}^{zz}$ | $z_1 + z_2$ | 24.7                          | 13.5                       | 8.0                    | $\approx 0.0$ |
| $\text{D}_{101}^{zz}$ | $z_1 + z_2$ | 25.3                          | 13.5                       | 8.0                    | $\approx 0.0$ |
| $\text{D}_{102}^{zz}$ | $z_2 + z_2$ | 24.8                          | 13.8                       | 8.0                    | $\approx 0.0$ |
| $\text{D}_{103}^{zz}$ | $z_1 + z_2$ | 25.9                          | 13.5                       | 8.0                    | $\approx 0.0$ |
| $\text{D}_{104}^{zz}$ | $z_2 + z_2$ | 25.8                          | 13.8                       | 8.0                    | $\approx 0.0$ |
| $\text{D}_{105}^{zz}$ | $z_2 + z_2$ | 26.2                          | 13.7                       | 8.0                    | $\approx 0.0$ |

| Dimer                 | Composition | $\text{BE}_{\text{B3LYP-D3}}$ | $\text{BE}_{\text{Gibbs}}$ | $\Delta\Delta\text{G}$ | $\%\chi_i(G)$ |
|-----------------------|-------------|-------------------------------|----------------------------|------------------------|---------------|
| $\text{D}_{106}^{zz}$ | $z_2 + z_2$ | 25.9                          | 13.7                       | 8.0                    | $\approx 0.0$ |
| $\text{D}_{107}^{zz}$ | $z_1 + z_1$ | 25.1                          | 13.1                       | 8.1                    | $\approx 0.0$ |
| $\text{D}_{108}^{zz}$ | $z_2 + z_2$ | 26.0                          | 13.7                       | 8.1                    | $\approx 0.0$ |
| $\text{D}_{109}^{zz}$ | $z_2 + z_2$ | 25.8                          | 13.7                       | 8.1                    | $\approx 0.0$ |
| $\text{D}_{110}^{zz}$ | $z_2 + z_2$ | 26.1                          | 13.7                       | 8.1                    | $\approx 0.0$ |
| $\text{D}_{111}^{zz}$ | $z_2 + z_2$ | 25.9                          | 13.6                       | 8.2                    | $\approx 0.0$ |
| $\text{D}_{112}^{zz}$ | $z_2 + z_2$ | 24.8                          | 13.5                       | 8.3                    | $\approx 0.0$ |
| $\text{D}_{113}^{zz}$ | $z_2 + z_2$ | 25.5                          | 13.5                       | 8.3                    | $\approx 0.0$ |
| $\text{D}_{114}^{zz}$ | $z_1 + z_1$ | 23.8                          | 12.8                       | 8.4                    | $\approx 0.0$ |
| $\text{D}_{115}^{zz}$ | $z_2 + z_2$ | 25.8                          | 13.3                       | 8.4                    | $\approx 0.0$ |
| $\text{D}_{116}^{zz}$ | $z_1 + z_1$ | 25.0                          | 12.7                       | 8.5                    | $\approx 0.0$ |
| $\text{D}_{117}^{zz}$ | $z_1 + z_2$ | 24.0                          | 13.0                       | 8.5                    | $\approx 0.0$ |
| $\text{D}_{118}^{zz}$ | $z_2 + z_2$ | 25.7                          | 13.2                       | 8.5                    | $\approx 0.0$ |
| $\text{D}_{119}^{zz}$ | $z_2 + z_2$ | 24.9                          | 13.1                       | 8.6                    | $\approx 0.0$ |
| $\text{D}_{120}^{zz}$ | $z_1 + z_2$ | 24.5                          | 12.8                       | 8.7                    | $\approx 0.0$ |
| $\text{D}_{121}^{zz}$ | $z_2 + z_2$ | 24.7                          | 13.0                       | 8.8                    | $\approx 0.0$ |
| $\text{D}_{122}^{zz}$ | $z_2 + z_2$ | 24.8                          | 12.8                       | 8.9                    | $\approx 0.0$ |
| $\text{D}_{123}^{zz}$ | $z_2 + z_2$ | 25.0                          | 12.8                       | 9.0                    | $\approx 0.0$ |
| $\text{D}_{124}^{zz}$ | $z_1 + z_2$ | 24.5                          | 12.5                       | 9.0                    | $\approx 0.0$ |
| $\text{D}_{125}^{zz}$ | $z_2 + z_2$ | 24.0                          | 12.8                       | 9.0                    | $\approx 0.0$ |
| $\text{D}_{126}^{zz}$ | $z_2 + z_2$ | 24.9                          | 12.7                       | 9.1                    | $\approx 0.0$ |
| $\text{D}_{127}^{zz}$ | $z_2 + z_2$ | 24.0                          | 12.7                       | 9.1                    | $\approx 0.0$ |
| $\text{D}_{128}^{zz}$ | $z_2 + z_2$ | 23.6                          | 12.6                       | 9.2                    | $\approx 0.0$ |
| $\text{D}_{129}^{zz}$ | $z_1 + z_1$ | 22.0                          | 11.3                       | 9.9                    | $\approx 0.0$ |
| $\text{D}_{130}^{zz}$ | $z_1 + z_1$ | 22.7                          | 11.2                       | 10.0                   | $\approx 0.0$ |
| $\text{D}_{131}^{zz}$ | $z_2 + z_2$ | 24.6                          | 11.8                       | 10.0                   | $\approx 0.0$ |
| $\text{D}_{132}^{zz}$ | $z_1 + z_1$ | 22.7                          | 11.2                       | 10.0                   | $\approx 0.0$ |
| $\text{D}_{133}^{zz}$ | $z_1 + z_1$ | 23.7                          | 11.2                       | 10.0                   | $\approx 0.0$ |
| $\text{D}_{134}^{zz}$ | $z_1 + z_1$ | 22.6                          | 10.8                       | 10.4                   | $\approx 0.0$ |
| $\text{D}_{135}^{zz}$ | $z_1 + z_2$ | 23.2                          | 10.8                       | 10.7                   | $\approx 0.0$ |
| $\text{D}_{136}^{zz}$ | $z_1 + z_1$ | 21.9                          | 10.5                       | 10.7                   | $\approx 0.0$ |
| $\text{D}_{137}^{zz}$ | $z_1 + z_2$ | 23.0                          | 10.7                       | 10.8                   | $\approx 0.0$ |
| $\text{D}_{138}^{zz}$ | $z_2 + z_2$ | 20.8                          | 10.3                       | 11.4                   | $\approx 0.0$ |
| $\text{D}_{139}^{zz}$ | $z_1 + z_1$ | 20.6                          | 9.8                        | 11.4                   | $\approx 0.0$ |
| $\text{D}_{140}^{zz}$ | $z_1 + z_1$ | 21.3                          | 9.7                        | 11.5                   | $\approx 0.0$ |

| Dimer                 | Composition | $\text{BE}_{\text{B3LYP-D3}}$ | $\text{BE}_{\text{Gibbs}}$ | $\Delta\Delta\text{G}$ | $\%\chi_i(G)$ |
|-----------------------|-------------|-------------------------------|----------------------------|------------------------|---------------|
| $\text{D}_{141}^{zz}$ | $z_1 + z_2$ | 21.7                          | 9.9                        | 11.6                   | $\approx 0.0$ |
| $\text{D}_{142}^{zz}$ | $z_1 + z_1$ | 21.1                          | 9.3                        | 11.9                   | $\approx 0.0$ |
| $\text{D}_{143}^{zz}$ | $z_1 + z_1$ | 21.7                          | 9.1                        | 12.1                   | $\approx 0.0$ |
| $\text{D}_{144}^{zz}$ | $z_2 + z_2$ | 22.2                          | 9.4                        | 12.4                   | $\approx 0.0$ |
| $\text{D}_{145}^{zz}$ | $z_2 + z_2$ | 21.7                          | 9.4                        | 12.4                   | $\approx 0.0$ |
| $\text{D}_{146}^{zz}$ | $z_1 + z_2$ | 21.6                          | 8.9                        | 12.6                   | $\approx 0.0$ |
| $\text{D}_{147}^{zz}$ | $z_1 + z_1$ | 19.2                          | 8.6                        | 12.6                   | $\approx 0.0$ |
| $\text{D}_{148}^{zz}$ | $z_1 + z_1$ | 19.9                          | 8.4                        | 12.8                   | $\approx 0.0$ |
| $\text{D}_{149}^{zz}$ | $z_1 + z_1$ | 20.2                          | 8.3                        | 12.9                   | $\approx 0.0$ |
| $\text{D}_{150}^{zz}$ | $z_2 + z_2$ | 21.1                          | 8.8                        | 12.9                   | $\approx 0.0$ |
| $\text{D}_{151}^{zz}$ | $z_1 + z_2$ | 19.8                          | 8.5                        | 13.0                   | $\approx 0.0$ |
| $\text{D}_{152}^{zz}$ | $z_2 + z_2$ | 20.4                          | 8.7                        | 13.1                   | $\approx 0.0$ |
| $\text{D}_{153}^{zz}$ | $z_1 + z_2$ | 20.6                          | 8.3                        | 13.2                   | $\approx 0.0$ |
| $\text{D}_{154}^{zz}$ | $z_1 + z_2$ | 19.7                          | 8.3                        | 13.2                   | $\approx 0.0$ |
| $\text{D}_{155}^{zz}$ | $z_2 + z_2$ | 20.3                          | 8.5                        | 13.2                   | $\approx 0.0$ |
| $\text{D}_{156}^{zz}$ | $z_2 + z_2$ | 20.0                          | 8.2                        | 13.5                   | $\approx 0.0$ |
| $\text{D}_{157}^{zz}$ | $z_1 + z_1$ | 18.0                          | 7.6                        | 13.6                   | $\approx 0.0$ |
| $\text{D}_{158}^{zz}$ | $z_2 + z_2$ | 20.0                          | 8.0                        | 13.8                   | $\approx 0.0$ |
| $\text{D}_{159}^{zz}$ | $z_2 + z_2$ | 19.9                          | 8.0                        | 13.8                   | $\approx 0.0$ |
| $\text{D}_{160}^{zz}$ | $z_1 + z_2$ | 19.0                          | 7.6                        | 13.9                   | $\approx 0.0$ |
| $\text{D}_{161}^{zz}$ | $z_2 + z_2$ | 18.8                          | 7.6                        | 14.2                   | $\approx 0.0$ |
| $\text{D}_{162}^{zz}$ | $z_1 + z_2$ | 19.2                          | 7.2                        | 14.3                   | $\approx 0.0$ |
| $\text{D}_{163}^{zz}$ | $z_2 + z_2$ | 20.1                          | 7.5                        | 14.3                   | $\approx 0.0$ |
| $\text{D}_{164}^{zz}$ | $z_2 + z_2$ | 20.2                          | 7.4                        | 14.3                   | $\approx 0.0$ |
| $\text{D}_{165}^{zz}$ | $z_1 + z_1$ | 18.3                          | 6.9                        | 14.3                   | $\approx 0.0$ |
| $\text{D}_{166}^{zz}$ | $z_1 + z_2$ | 18.5                          | 7.1                        | 14.4                   | $\approx 0.0$ |
| $\text{D}_{167}^{zz}$ | $z_1 + z_2$ | 18.1                          | 7.1                        | 14.4                   | $\approx 0.0$ |
| $\text{D}_{168}^{zz}$ | $z_1 + z_1$ | 17.8                          | 6.8                        | 14.4                   | $\approx 0.0$ |
| $\text{D}_{169}^{zz}$ | $z_1 + z_2$ | 17.6                          | 7.0                        | 14.5                   | $\approx 0.0$ |
| $\text{D}_{170}^{zz}$ | $z_2 + z_2$ | 18.4                          | 7.2                        | 14.6                   | $\approx 0.0$ |
| $\text{D}_{171}^{zz}$ | $z_1 + z_2$ | 17.7                          | 6.7                        | 14.8                   | $\approx 0.0$ |
| $\text{D}_{172}^{zz}$ | $z_2 + z_2$ | 18.2                          | 6.9                        | 14.9                   | $\approx 0.0$ |
| $\text{D}_{173}^{zz}$ | $z_1 + z_1$ | 17.3                          | 6.3                        | 14.9                   | $\approx 0.0$ |
| $\text{D}_{174}^{zz}$ | $z_1 + z_2$ | 16.7                          | 6.4                        | 15.1                   | $\approx 0.0$ |
| $\text{D}_{175}^{zz}$ | $z_1 + z_2$ | 18.0                          | 6.3                        | 15.2                   | $\approx 0.0$ |

| <b>Dimer</b>                   | <b>Composition</b> | <b>BE<sub>B3LYP-D3</sub></b> | <b>BE<sub>Gibbs</sub></b> | <b><math>\Delta\Delta G</math></b> | <b><math>\% \chi_i(G)</math></b> |
|--------------------------------|--------------------|------------------------------|---------------------------|------------------------------------|----------------------------------|
| D <sub>176</sub> <sup>zz</sup> | $z_2 + z_2$        | 18.0                         | 6.6                       | 15.2                               | $\approx 0.0$                    |
| D <sub>177</sub> <sup>zz</sup> | $z_1 + z_1$        | 17.9                         | 6.0                       | 15.2                               | $\approx 0.0$                    |
| D <sub>178</sub> <sup>zz</sup> | $z_2 + z_2$        | 17.9                         | 6.5                       | 15.3                               | $\approx 0.0$                    |
| D <sub>179</sub> <sup>zz</sup> | $z_2 + z_2$        | 17.1                         | 6.4                       | 15.4                               | $\approx 0.0$                    |
| D <sub>180</sub> <sup>zz</sup> | $z_2 + z_2$        | 17.1                         | 5.9                       | 15.9                               | $\approx 0.0$                    |
| D <sub>181</sub> <sup>zz</sup> | $z_1 + z_2$        | 15.6                         | 4.8                       | 16.7                               | $\approx 0.0$                    |
| D <sub>182</sub> <sup>zz</sup> | $z_1 + z_2$        | 16.6                         | 4.7                       | 16.8                               | $\approx 0.0$                    |
| D <sub>183</sub> <sup>zz</sup> | $z_1 + z_2$        | 15.8                         | 4.3                       | 17.1                               | $\approx 0.0$                    |
| D <sub>184</sub> <sup>zz</sup> | $z_1 + z_1$        | 12.6                         | 1.7                       | 19.5                               | $\approx 0.0$                    |
| D <sub>185</sub> <sup>zz</sup> | $z_1 + z_1$        | 13.2                         | 1.3                       | 19.9                               | $\approx 0.0$                    |
| D <sub>186</sub> <sup>zz</sup> | $z_1 + z_1$        | 4.1                          | -6.7                      | 27.9                               | $\approx 0.0$                    |

### 3 Laplacian of the electron density distributions

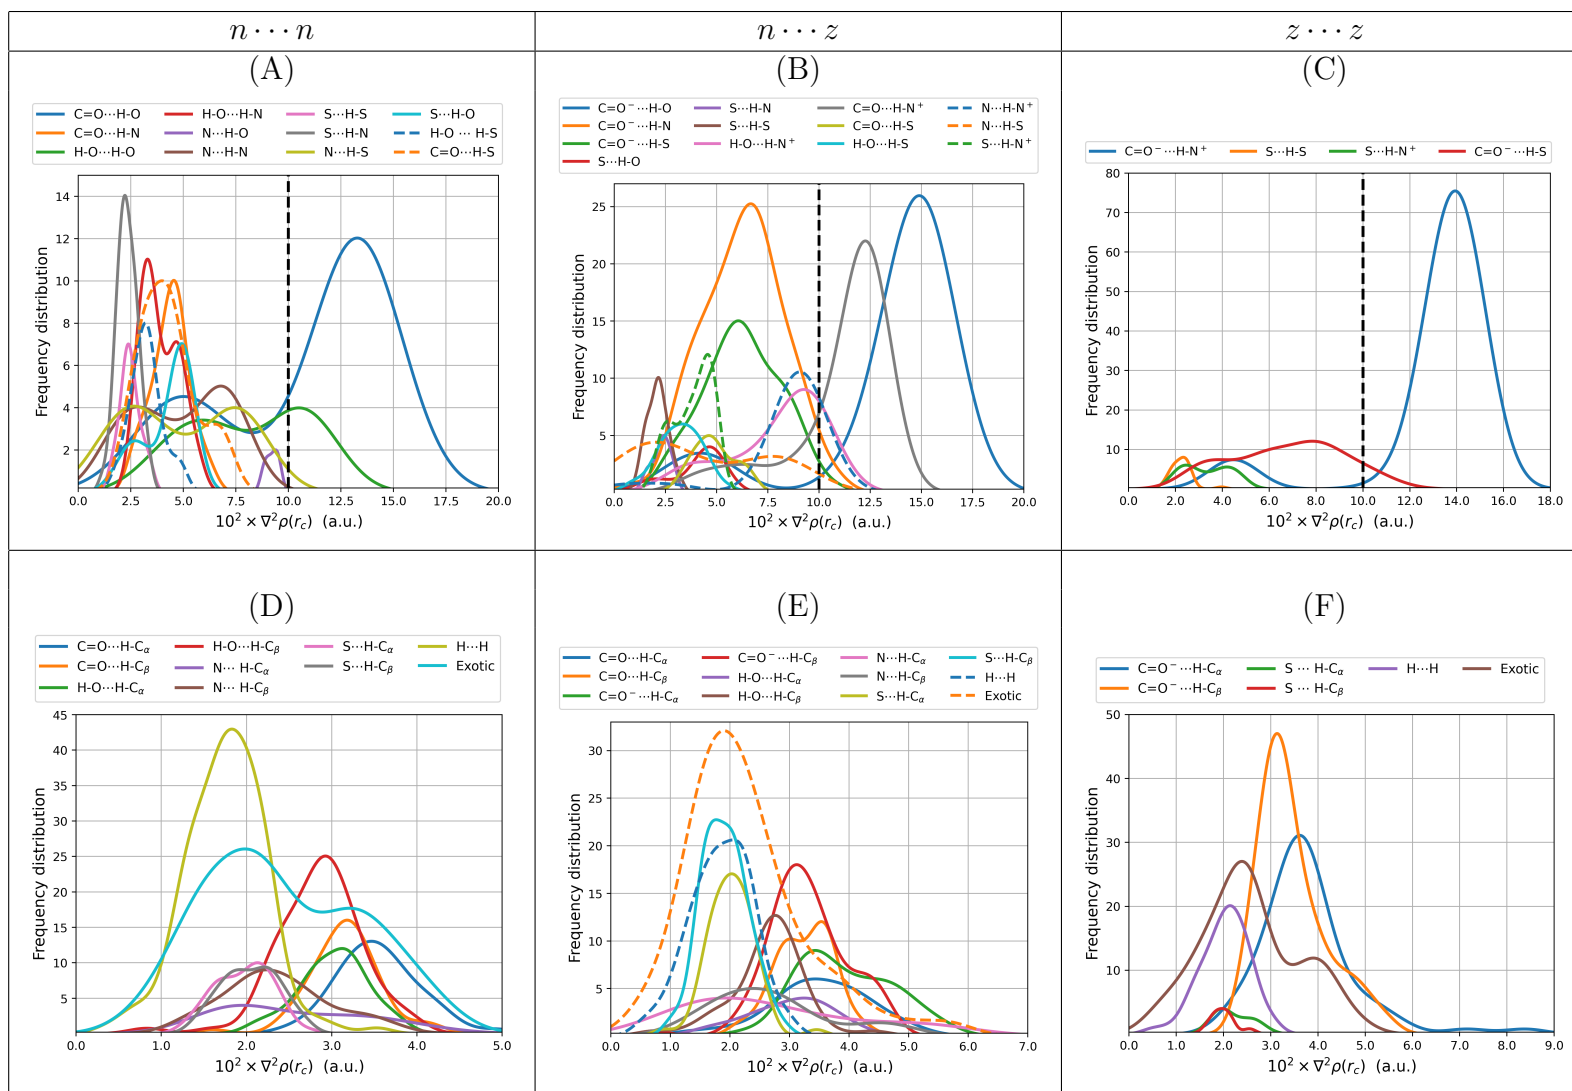

Figure S2: Laplacian of the electron densities at bond critical points for intermolecular contacts for all dimers of cysteine found in this work. The top row shows only primary hydrogen bonds including salt bridges. The bottom row shows secondary hydrogen bonds, dihydrogen bonds, and all exotic interactions. The left column is reserved for the  $n \cdots n$  dimers, the middle column for  $n \cdots z$  and the right column for  $z \cdots z$ . All values taken from the B3LYP-D3/6-311++G( $d,p$ ) potential energy surfaces with water represented as a continuum solvent. Dashed vertical lines mark the reference value for the gas phase water dimer.

## 4 NBO and NCI surfaces

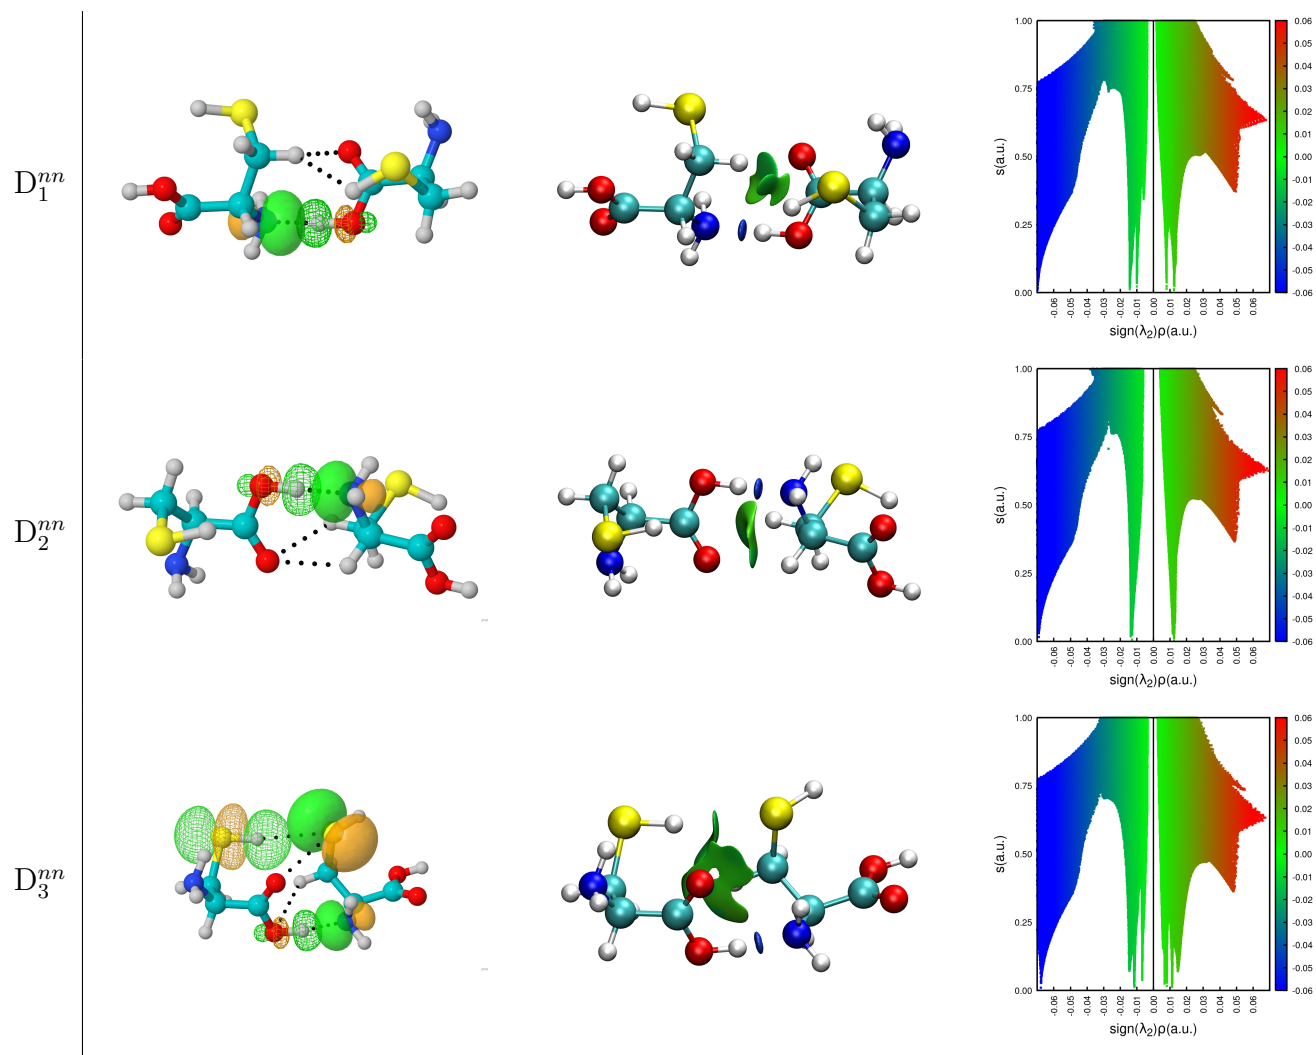

Figure S3: NBOs, NCI surfaces and thorough plots describing the intermolecular contacts for the  $n \cdots n$  cysteine dimers with populations higher than 5%.

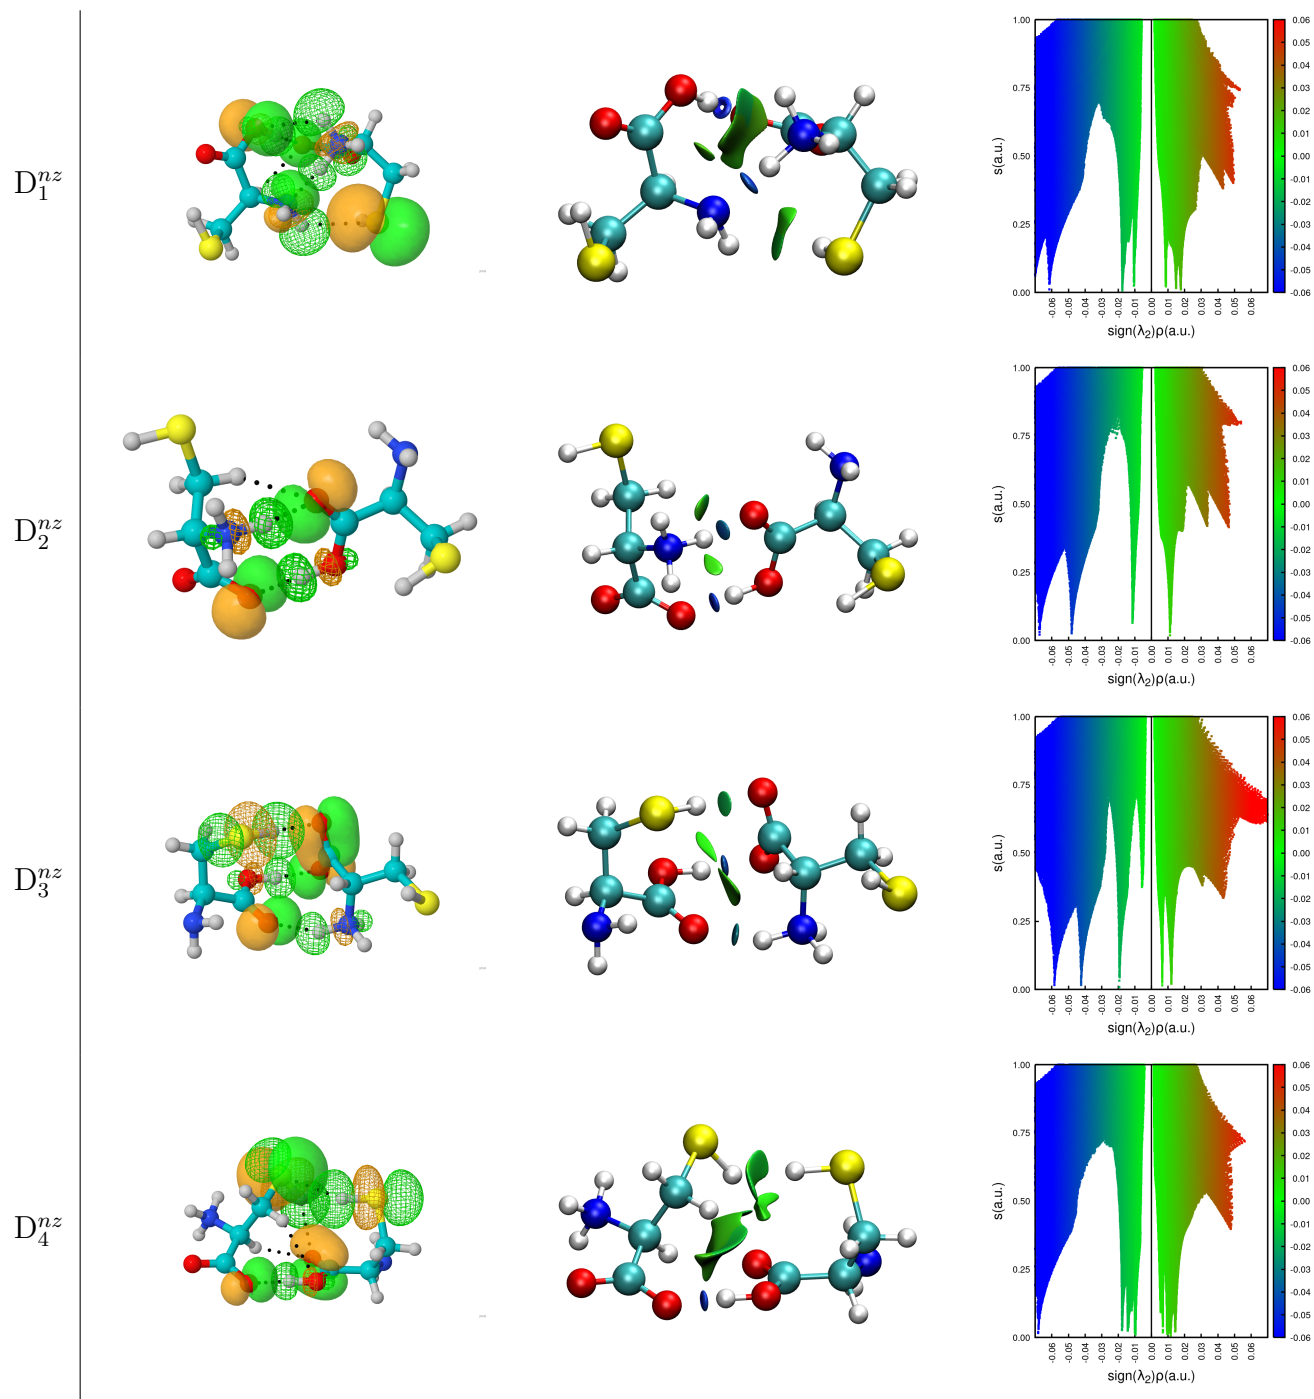

Figure S4: NBOs, NCI surfaces and thorough plots describing the intermolecular contacts for the  $n \cdots z$  cysteine dimers with populations higher than 5%.



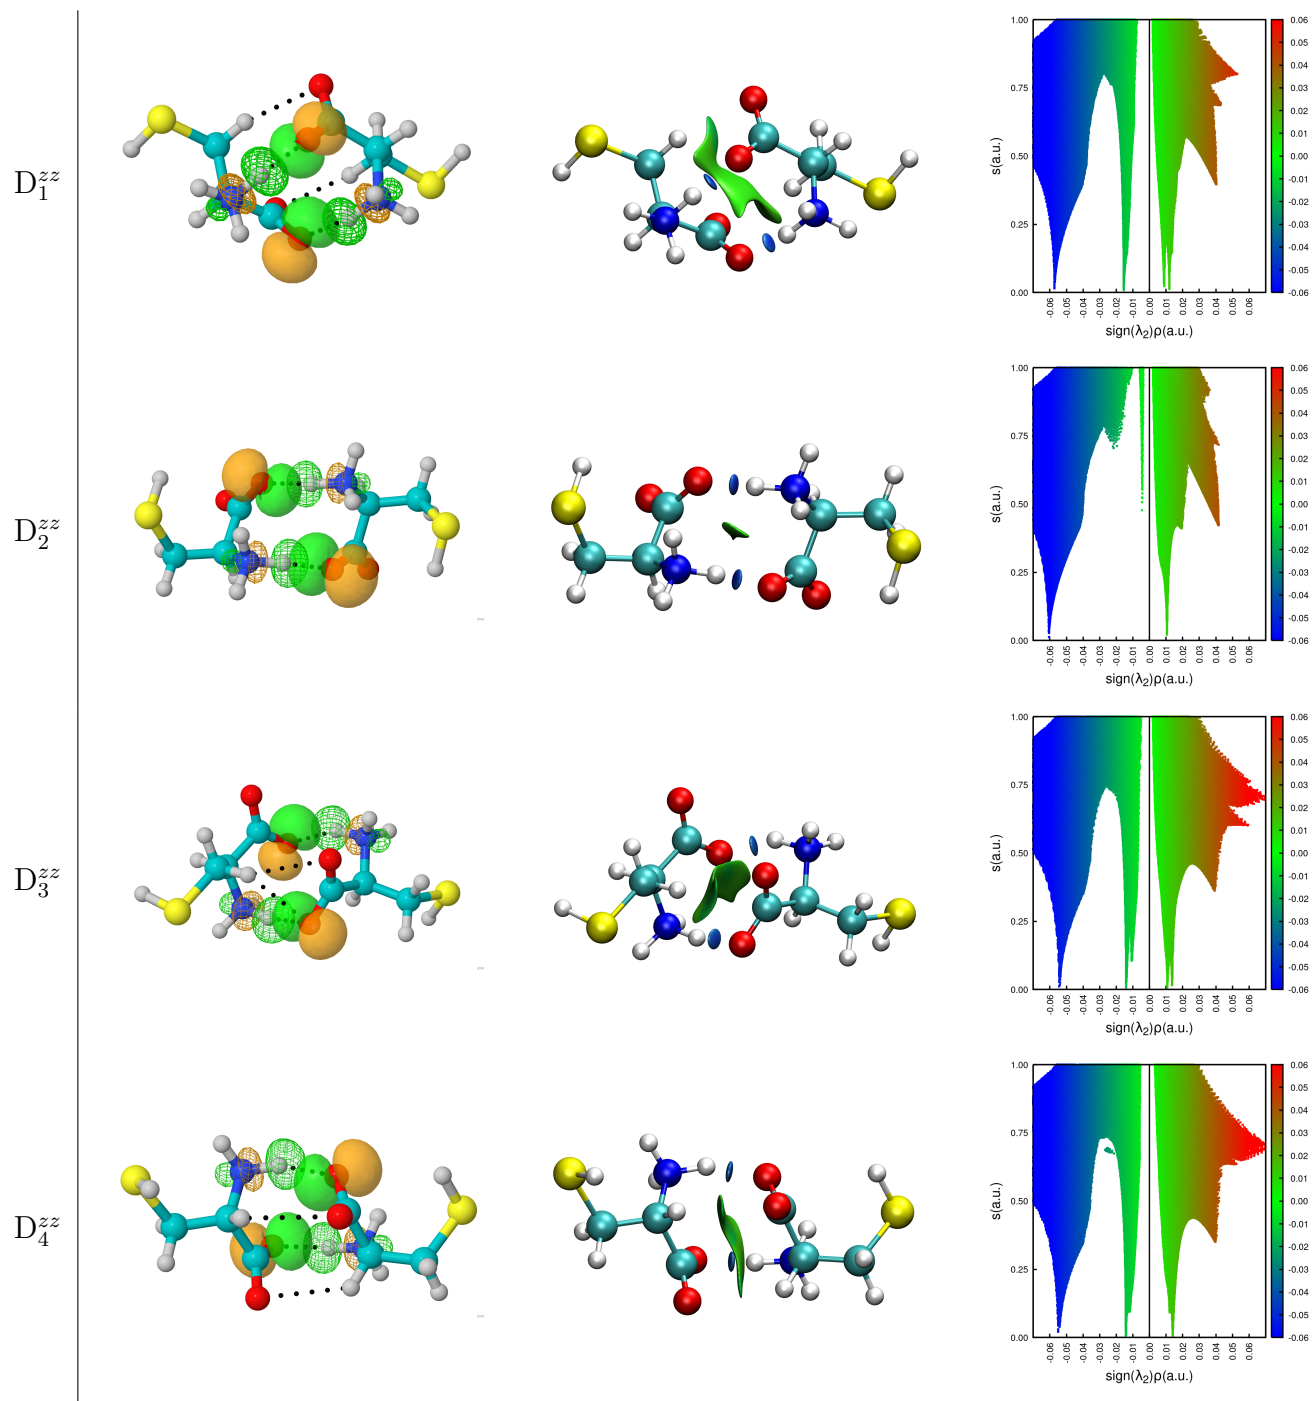

Figure S5: NBOs, NCI surfaces and thorough plots describing the intermolecular contacts for the  $z \cdots z$  cysteine dimers with populations higher than 5%.

| Nov 11, 22 15:56          | dimers_structures.xyz         | Page 1/325 |
|---------------------------|-------------------------------|------------|
| 28                        |                               |            |
| Dimer 1 of the n...n type |                               |            |
| C                         | -3.255452 0.495334 0.623992   |            |
| C                         | -3.518970 -1.002092 0.409208  |            |
| N                         | -3.875423 1.294425 -0.426063  |            |
| H                         | -3.452093 1.053962 -1.319783  |            |
| H                         | -3.659228 2.275665 -0.277475  |            |
| H                         | -3.721300 0.759962 1.581256   |            |
| C                         | -1.752201 0.763500 0.797845   |            |
| O                         | -1.161356 1.642731 0.196874   |            |
| O                         | -1.175646 -0.071587 1.649392  |            |
| H                         | -0.154551 0.087083 1.672313   |            |
| H                         | -3.243338 -1.571805 1.293514  |            |
| H                         | -4.579308 -1.151143 0.206303  |            |
| S                         | -2.625357 -1.722550 -1.043165 |            |
| H                         | -1.425145 -1.818590 -0.437937 |            |
| C                         | 1.947061 -0.597683 0.454282   |            |
| C                         | 1.327569 -0.181710 -0.888404  |            |
| N                         | 1.448707 0.232773 1.552740    |            |
| H                         | 1.652370 1.211816 1.357231    |            |
| H                         | 1.937251 0.003891 2.414646    |            |
| H                         | 1.638131 -1.632652 0.640791   |            |
| C                         | 3.475136 -0.616124 0.391735   |            |
| O                         | 4.199472 -0.086411 1.199612   |            |
| O                         | 3.915727 -1.307850 -0.672455  |            |
| H                         | 4.886417 -1.312505 -0.670289  |            |
| H                         | 1.598230 -0.896296 -1.662193  |            |
| H                         | 0.244914 -0.159626 -0.795791  |            |
| S                         | 1.791759 1.514848 -1.441535   |            |
| H                         | 3.037799 1.200684 -1.853457   |            |
| 28                        |                               |            |
| Dimer 2 of the n...n type |                               |            |
| C                         | -3.021964 -1.109549 0.091679  |            |
| C                         | -3.962275 -0.232924 -0.749604 |            |
| N                         | -3.558203 -1.331534 1.427661  |            |
| H                         | -3.611574 -0.441071 1.916630  |            |
| H                         | -2.910336 -1.901266 1.963362  |            |
| H                         | -2.959649 -2.075836 -0.423166 |            |
| C                         | -1.596893 -0.534905 0.078314  |            |
| O                         | -0.967263 -0.296603 1.093835  |            |
| O                         | -1.141611 -0.333890 -1.147856 |            |
| H                         | -0.194052 0.077927 -1.131725  |            |
| H                         | -3.630875 -0.204363 -1.785379 |            |
| H                         | -4.968583 -0.649975 -0.709201 |            |
| S                         | -4.131883 1.503744 -0.137669  |            |
| H                         | -2.898360 1.915126 -0.496971  |            |
| C                         | 1.905093 0.490935 0.199937    |            |
| C                         | 2.090294 -1.011397 0.450777   |            |
| N                         | 1.284641 0.736442 -1.103073   |            |
| H                         | 1.877903 0.360031 -1.841014   |            |
| H                         | 1.218402 1.736619 -1.274527   |            |
| H                         | 1.214716 0.844551 0.971954    |            |
| C                         | 3.206649 1.268518 0.376055    |            |
| O                         | 3.642606 2.066715 -0.419218   |            |
| O                         | 3.809493 0.964607 1.538622    |            |
| H                         | 4.621504 1.489708 1.622797    |            |
| H                         | 2.435821 -1.181390 1.468017   |            |
| H                         | 1.127662 -1.504551 0.327358   |            |
| S                         | 3.240872 -1.843439 -0.727140  |            |
| H                         | 4.377306 -1.295452 -0.249307  |            |
| 28                        |                               |            |
| Dimer 3 of the n...n type |                               |            |
| C                         | 2.204763 0.494231 0.705661    |            |
| C                         | 1.297969 -0.739079 0.576171   |            |
| N                         | 1.617991 1.650872 0.027260    |            |
| H                         | 1.547977 1.464150 -0.972074   |            |
| H                         | 2.217966 2.464684 0.129912    |            |
| H                         | 2.279861 0.725499 1.773817    |            |
| C                         | 3.626991 0.197943 0.228171    |            |

| Nov 11, 22 15:56          | dimers_structures.xyz         | Page 2/325 |
|---------------------------|-------------------------------|------------|
| O                         | 4.233595 0.867244 -0.572585   |            |
| O                         | 4.122828 -0.902124 0.819533   |            |
| H                         | 5.027031 -1.055574 0.501551   |            |
| H                         | 1.668533 -1.548244 1.200678   |            |
| H                         | 0.298687 -0.478349 0.919961   |            |
| S                         | 1.122899 -1.361960 -1.155085  |            |
| H                         | 2.222640 -2.142486 -1.136202  |            |
| C                         | -3.084425 0.942048 0.267240   |            |
| C                         | -3.061442 -0.308069 1.169815  |            |
| N                         | -4.040025 0.799260 -0.820334  |            |
| H                         | -3.726368 0.069197 -1.454215  |            |
| H                         | -4.077261 1.656516 -1.363288  |            |
| H                         | -3.398719 1.772708 0.906436   |            |
| C                         | -1.648341 1.238464 -0.178684  |            |
| O                         | -1.219423 0.951955 -1.282063  |            |
| O                         | -0.918780 1.777160 0.789291   |            |
| H                         | 0.066969 1.834539 0.496190    |            |
| H                         | -2.355198 -0.164666 1.987296  |            |
| H                         | -4.056263 -0.457126 1.590571  |            |
| S                         | -2.689048 -1.901127 0.310118  |            |
| H                         | -1.462076 -1.589476 -0.153307 |            |
| 28                        |                               |            |
| Dimer 4 of the n...n type |                               |            |
| C                         | 2.993992 0.744406 -0.564280   |            |
| C                         | 2.899805 -0.779387 -0.786846  |            |
| N                         | 4.128543 1.088348 0.281967    |            |
| H                         | 3.964571 0.741171 1.223250    |            |
| H                         | 4.211504 2.097814 0.355315    |            |
| H                         | 3.144470 1.189487 -1.551895   |            |
| C                         | 1.642551 1.240069 -0.041777   |            |
| O                         | 1.393712 1.361675 1.144959    |            |
| O                         | 0.769409 1.468083 -1.014371   |            |
| H                         | -0.153017 1.644701 -0.602456  |            |
| H                         | 2.049891 -1.014593 -1.428288  |            |
| H                         | 3.812553 -1.117427 -1.278545  |            |
| S                         | 2.793127 -1.797776 0.748548   |            |
| H                         | 1.588536 -1.347479 1.154372   |            |
| C                         | -2.597580 0.760608 -0.474081  |            |
| C                         | -1.950976 -0.317024 -1.366777 |            |
| N                         | -1.583587 1.572835 0.196086   |            |
| H                         | -1.224954 1.085512 1.015591   |            |
| H                         | -1.981491 2.446284 0.527541   |            |
| H                         | -3.182747 1.404802 -1.136384  |            |
| C                         | -3.575851 0.120265 0.509623   |            |
| O                         | -3.452100 0.136850 1.710946   |            |
| O                         | -4.581757 -0.494534 -0.134649 |            |
| H                         | -5.168101 -0.915048 0.514746  |            |
| H                         | -2.718564 -0.885760 -1.888256 |            |
| H                         | -1.316415 0.172968 -2.104552  |            |
| S                         | -0.828395 -1.474179 -0.475681 |            |
| H                         | -1.782384 -2.169639 0.177076  |            |
| 28                        |                               |            |
| Dimer 5 of the n...n type |                               |            |
| C                         | 3.282958 -0.585161 0.103305   |            |
| C                         | 3.259882 0.728804 0.905649    |            |
| N                         | 3.873176 -0.389681 -1.211041  |            |
| H                         | 3.290521 0.246369 -1.750488   |            |
| H                         | 3.880208 -1.266460 -1.722923  |            |
| H                         | 3.903390 -1.289609 0.669379   |            |
| C                         | 1.874639 -1.181832 0.064681   |            |
| O                         | 1.312474 -1.485253 -0.978055  |            |
| O                         | 1.325171 -1.293910 1.262277   |            |
| H                         | 0.362150 -1.532959 1.179967   |            |
| H                         | 3.018209 0.538542 1.948903    |            |
| H                         | 4.245411 1.189307 0.846783    |            |
| S                         | 2.075414 1.992398 0.254090    |            |
| H                         | 0.961956 1.427796 0.764650    |            |
| C                         | -3.282901 -0.585239 -0.103308 |            |
| C                         | -3.259897 0.728727 -0.905647  |            |

| Nov 11, 22 15:56          |           |           | dimers_structures.xyz | Page 3/325 |
|---------------------------|-----------|-----------|-----------------------|------------|
| N                         | -3.873139 | -0.389809 | 1.211044              |            |
| H                         | -3.290564 | 0.246313  | 1.750491              |            |
| H                         | -3.880063 | -1.266591 | 1.722924              |            |
| H                         | -3.903306 | -1.289707 | -0.669388             |            |
| C                         | -1.874569 | -1.181878 | -0.064696             |            |
| O                         | -1.312393 | -1.485331 | 0.978023              |            |
| O                         | -1.325088 | -1.293907 | -1.262295             |            |
| H                         | -0.362041 | -1.532904 | -1.179952             |            |
| H                         | -3.018151 | 0.538477  | -1.948885             |            |
| H                         | -4.245476 | 1.189130  | -0.846843             |            |
| S                         | -2.075567 | 1.992442  | -0.254060             |            |
| H                         | -0.962041 | 1.427969  | -0.764623             |            |
| 28                        |           |           |                       |            |
| Dimer 6 of the n...n type |           |           |                       |            |
| C                         | 2.994012  | -0.341362 | -0.006800             |            |
| C                         | 3.010077  | 1.117957  | -0.477673             |            |
| N                         | 2.619909  | -1.343515 | -1.006473             |            |
| H                         | 1.972643  | -0.961465 | -1.689656             |            |
| H                         | 3.428076  | -1.698951 | -1.502180             |            |
| H                         | 4.002825  | -0.576679 | 0.349721              |            |
| C                         | 2.105455  | -0.509246 | 1.239776              |            |
| O                         | 2.081446  | 0.285049  | 2.151900              |            |
| O                         | 1.387362  | -1.632128 | 1.244796              |            |
| H                         | 1.579359  | -2.057696 | 0.369530              |            |
| H                         | 3.323722  | 1.768831  | 0.336995              |            |
| H                         | 3.714207  | 1.222313  | -1.303220             |            |
| S                         | 1.390706  | 1.716896  | -1.129715             |            |
| H                         | 0.725126  | 1.720989  | 0.045252              |            |
| C                         | -2.828832 | -0.315440 | 0.623478              |            |
| C                         | -1.790954 | -1.429580 | 0.432919              |            |
| N                         | -3.956846 | -0.311237 | -0.312375             |            |
| H                         | -3.693351 | -0.727179 | -1.202105             |            |
| H                         | -4.753386 | -0.817794 | 0.053495              |            |
| H                         | -3.222156 | -0.409178 | 1.641256              |            |
| C                         | -2.152322 | 1.067437  | 0.598086              |            |
| O                         | -1.108553 | 1.307224  | 1.165249              |            |
| O                         | -2.826295 | 1.988071  | -0.085703             |            |
| H                         | -3.619214 | 1.499339  | -0.432734             |            |
| H                         | -0.982728 | -1.321973 | 1.153400              |            |
| H                         | -2.270099 | -2.398152 | 0.577265              |            |
| S                         | -1.064280 | -1.494600 | -1.260907             |            |
| H                         | -0.365557 | -0.340196 | -1.183772             |            |
| 28                        |           |           |                       |            |
| Dimer 7 of the n...n type |           |           |                       |            |
| C                         | 3.280788  | 0.584037  | -0.103978             |            |
| C                         | 3.249814  | -0.724104 | -0.915948             |            |
| N                         | 3.876265  | 0.377225  | 1.206121              |            |
| H                         | 3.292690  | -0.258590 | 1.744789              |            |
| H                         | 3.891524  | 1.250884  | 1.723133              |            |
| H                         | 3.900710  | 1.290456  | -0.668009             |            |
| C                         | 1.873984  | 1.183222  | -0.055333             |            |
| O                         | 1.311179  | 1.467832  | 0.992320              |            |
| O                         | 1.325973  | 1.317946  | -1.251272             |            |
| H                         | 0.363073  | 1.556235  | -1.165696             |            |
| H                         | 3.000549  | -0.525568 | -1.955902             |            |
| H                         | 4.235211  | -1.186151 | -0.867761             |            |
| S                         | 2.069472  | -1.991509 | -0.264774             |            |
| H                         | 0.951320  | -1.420413 | -0.757624             |            |
| C                         | -3.282174 | 0.582782  | 0.097786              |            |
| C                         | -3.264971 | -0.733810 | 0.895514              |            |
| N                         | -3.862300 | 0.391475  | -1.221848             |            |
| H                         | -3.276381 | -0.244382 | -1.758047             |            |
| H                         | -3.863175 | 1.269459  | -1.731721             |            |
| H                         | -3.907451 | 1.285314  | 0.661059              |            |
| C                         | -1.874390 | 1.181848  | 0.071128              |            |
| O                         | -1.311509 | 1.503843  | -0.965604             |            |
| O                         | -1.326582 | 1.275733  | 1.271132              |            |
| H                         | -0.363531 | 1.516128  | 1.193654              |            |
| H                         | -3.036584 | -0.546872 | 1.942314              |            |

| Nov 11, 22 15:56           |           |           | dimers_structures.xyz | Page 4/325 |
|----------------------------|-----------|-----------|-----------------------|------------|
| H                          | -4.248217 | -1.197199 | 0.823139              |            |
| S                          | -2.067176 | -1.990433 | 0.254184              |            |
| H                          | -0.965024 | -1.425811 | 0.788577              |            |
| 28                         |           |           |                       |            |
| Dimer 8 of the n...n type  |           |           |                       |            |
| C                          | -1.897502 | -0.563674 | 0.392203              |            |
| C                          | -3.102016 | -0.972407 | -0.460326             |            |
| N                          | -2.160512 | -0.298830 | 1.808596              |            |
| H                          | -3.106138 | 0.045622  | 1.950301              |            |
| H                          | -2.028400 | -1.127606 | 2.374278              |            |
| H                          | -1.159871 | -1.366328 | 0.327804              |            |
| C                          | -1.175984 | 0.650561  | -0.212629             |            |
| O                          | -1.012118 | 0.818092  | -1.400327             |            |
| O                          | -0.715231 | 1.507727  | 0.700212              |            |
| H                          | -1.001641 | 1.109951  | 1.565684              |            |
| H                          | -2.782396 | -1.185595 | -1.479316             |            |
| H                          | -3.554876 | -1.869922 | -0.038727             |            |
| S                          | -4.453975 | 0.284996  | -0.508374             |            |
| H                          | -3.771013 | 1.205875  | -1.219045             |            |
| C                          | 3.103995  | -0.896558 | 0.092882              |            |
| C                          | 3.492472  | 0.477100  | 0.652958              |            |
| N                          | 3.360978  | -1.119397 | -1.332174             |            |
| H                          | 3.233588  | -0.259037 | -1.859833             |            |
| H                          | 4.302962  | -1.453779 | -1.494994             |            |
| H                          | 3.664387  | -1.649648 | 0.658704              |            |
| C                          | 1.630280  | -1.223715 | 0.387005              |            |
| O                          | 1.056204  | -0.904693 | 1.403641              |            |
| O                          | 1.031952  | -1.925830 | -0.576808             |            |
| H                          | 1.711831  | -1.987776 | -1.296308             |            |
| H                          | 3.260630  | 0.524999  | 1.715991              |            |
| H                          | 4.563791  | 0.628358  | 0.519994              |            |
| S                          | 2.681140  | 1.892965  | -0.207165             |            |
| H                          | 1.435307  | 1.674896  | 0.262849              |            |
| 28                         |           |           |                       |            |
| Dimer 9 of the n...n type  |           |           |                       |            |
| C                          | 2.996793  | 0.340783  | 0.003221              |            |
| C                          | 3.014657  | -1.118923 | 0.472765              |            |
| N                          | 2.625876  | 1.342436  | 1.004490              |            |
| H                          | 1.975351  | 0.961812  | 1.685420              |            |
| H                          | 3.434955  | 1.692285  | 1.502714              |            |
| H                          | 4.004483  | 0.576772  | -0.356141             |            |
| C                          | 2.104468  | 0.509876  | -1.240378             |            |
| O                          | 2.072909  | -0.286326 | -2.150584             |            |
| O                          | 1.391838  | 1.636318  | -1.245386             |            |
| H                          | 1.587598  | 2.062106  | -0.371155             |            |
| H                          | 3.327798  | -1.768847 | -0.342863             |            |
| H                          | 3.719925  | -1.223406 | 1.297322              |            |
| S                          | 1.396483  | -1.719715 | 1.125939              |            |
| H                          | 0.729548  | -1.721161 | -0.048189             |            |
| C                          | -2.827907 | 0.320879  | -0.622935             |            |
| C                          | -1.782723 | 1.427680  | -0.430352             |            |
| N                          | -3.959163 | 0.325816  | 0.308956              |            |
| H                          | -3.694421 | 0.737185  | 1.200462              |            |
| H                          | -4.749114 | 0.841507  | -0.058481             |            |
| H                          | -3.217410 | 0.416293  | -1.642059             |            |
| C                          | -2.162109 | -1.067135 | -0.594263             |            |
| O                          | -1.116439 | -1.314639 | -1.154498             |            |
| O                          | -2.848346 | -1.983342 | 0.083405              |            |
| H                          | -3.639086 | -1.488589 | 0.426647              |            |
| H                          | -0.973582 | 1.314485  | -1.148886             |            |
| H                          | -2.254711 | 2.399520  | -0.576275             |            |
| S                          | -1.059693 | 1.488234  | 1.265115              |            |
| H                          | -0.365728 | 0.330921  | 1.188660              |            |
| 28                         |           |           |                       |            |
| Dimer 10 of the n...n type |           |           |                       |            |
| C                          | -1.231856 | 0.048852  | 0.038950              |            |
| C                          | -2.061890 | -1.093056 | -0.550333             |            |
| N                          | -1.044700 | 0.047584  | 1.490241              |            |
| H                          | -1.900746 | -0.238816 | 1.959482              |            |

| Nov 11, 22 15:56           |           |           |           | dimers_structures.xyz | Page 5/325 |
|----------------------------|-----------|-----------|-----------|-----------------------|------------|
| H                          | -0.304803 | -0.588624 | 1.770313  |                       |            |
| H                          | -0.244744 | -0.005774 | -0.427140 |                       |            |
| C                          | -1.753015 | 1.426399  | -0.397477 |                       |            |
| O                          | -2.241638 | 1.648397  | -1.481901 |                       |            |
| O                          | -1.579231 | 2.380630  | 0.519836  |                       |            |
| H                          | -1.218675 | 1.902998  | 1.308957  |                       |            |
| H                          | -2.089305 | -1.014147 | -1.636261 |                       |            |
| H                          | -1.595552 | -2.039900 | -0.279327 |                       |            |
| S                          | -3.788710 | -1.169343 | 0.092365  |                       |            |
| H                          | -4.214091 | -0.035186 | -0.501069 |                       |            |
| C                          | 2.982851  | -0.735401 | -0.362236 |                       |            |
| C                          | 3.322439  | 0.638207  | 0.229930  |                       |            |
| N                          | 2.610754  | -0.762207 | -1.779196 |                       |            |
| H                          | 2.106882  | 0.081172  | -2.042337 |                       |            |
| H                          | 3.422669  | -0.843192 | -2.379113 |                       |            |
| H                          | 3.862808  | -1.375485 | -0.232577 |                       |            |
| C                          | 1.875139  | -1.431686 | 0.443588  |                       |            |
| O                          | 1.736041  | -1.313750 | 1.642059  |                       |            |
| O                          | 1.059302  | -2.183284 | -0.294022 |                       |            |
| H                          | 1.362432  | -2.035978 | -1.227846 |                       |            |
| H                          | 3.646697  | 0.534286  | 1.263982  |                       |            |
| H                          | 4.131225  | 1.084935  | -0.348150 |                       |            |
| S                          | 1.929124  | 1.849050  | 0.164009  |                       |            |
| H                          | 1.228383  | 1.324929  | 1.189496  |                       |            |
| 28                         |           |           |           |                       |            |
| Dimer 11 of the n...n type |           |           |           |                       |            |
| C                          | -2.719625 | 0.961317  | -0.068753 |                       |            |
| C                          | -3.312534 | -0.370200 | -0.553704 |                       |            |
| N                          | -1.953357 | 1.735689  | -1.039305 |                       |            |
| H                          | -1.352480 | 1.139332  | -1.602864 |                       |            |
| H                          | -2.557114 | 2.264395  | -1.656594 |                       |            |
| H                          | -3.558447 | 1.580771  | 0.268679  |                       |            |
| C                          | -1.870062 | 0.750338  | 1.194920  |                       |            |
| O                          | -2.164889 | -0.021468 | 2.079005  |                       |            |
| O                          | -0.766468 | 1.499807  | 1.252588  |                       |            |
| H                          | -0.721037 | 1.984970  | 0.391601  |                       |            |
| H                          | -3.880818 | -0.840631 | 0.247604  |                       |            |
| H                          | -3.980725 | -0.179173 | -1.393648 |                       |            |
| S                          | -2.060616 | -1.565787 | -1.188773 |                       |            |
| H                          | -1.441644 | -1.794190 | -0.009750 |                       |            |
| C                          | 2.742453  | -0.366590 | -0.761711 |                       |            |
| C                          | 1.662067  | -1.431204 | -0.533399 |                       |            |
| N                          | 3.944526  | -0.467233 | 0.070176  |                       |            |
| H                          | 3.734086  | -0.910777 | 0.960706  |                       |            |
| H                          | 4.676026  | -0.998577 | -0.385428 |                       |            |
| H                          | 3.042265  | -0.429344 | -1.813208 |                       |            |
| C                          | 2.148283  | 1.047537  | -0.616618 |                       |            |
| O                          | 1.068757  | 1.366412  | -1.064028 |                       |            |
| O                          | 2.939734  | 1.901482  | 0.027423  |                       |            |
| H                          | 3.729918  | 1.355019  | 0.281703  |                       |            |
| H                          | 0.804909  | -1.225861 | -1.173176 |                       |            |
| H                          | 2.061064  | -2.415350 | -0.779074 |                       |            |
| S                          | 1.092072  | -1.560802 | 1.215867  |                       |            |
| H                          | 0.594739  | -0.311540 | 1.313347  |                       |            |
| 28                         |           |           |           |                       |            |
| Dimer 12 of the n...n type |           |           |           |                       |            |
| C                          | -3.055216 | -0.591789 | -0.352445 |                       |            |
| C                          | -3.401708 | 0.902110  | -0.351130 |                       |            |
| N                          | -3.065273 | -1.271141 | 0.945420  |                       |            |
| H                          | -2.765837 | -0.641350 | 1.686005  |                       |            |
| H                          | -3.986639 | -1.620207 | 1.179442  |                       |            |
| H                          | -3.783698 | -1.091251 | -1.001351 |                       |            |
| C                          | -1.703081 | -0.856999 | -1.037062 |                       |            |
| O                          | -1.295623 | -0.240133 | -1.996215 |                       |            |
| O                          | -1.017455 | -1.861449 | -0.492516 |                       |            |
| H                          | -1.557263 | -2.129384 | 0.296719  |                       |            |
| H                          | -3.336511 | 1.299070  | -1.363142 |                       |            |
| H                          | -4.420822 | 1.034215  | 0.012403  |                       |            |
| S                          | -2.349464 | 1.925226  | 0.767784  |                       |            |

| Nov 11, 22 15:56           |           |           |           | dimers_structures.xyz | Page 6/325 |
|----------------------------|-----------|-----------|-----------|-----------------------|------------|
| H                          | -1.198947 | 1.793249  | 0.072598  |                       |            |
| C                          | 1.643366  | -0.187321 | -0.559886 |                       |            |
| C                          | 3.108457  | -0.162692 | -1.009667 |                       |            |
| N                          | 0.953444  | 1.104812  | -0.549875 |                       |            |
| H                          | 1.596605  | 1.864725  | -0.344242 |                       |            |
| H                          | 0.513675  | 1.277729  | -1.446139 |                       |            |
| H                          | 1.099770  | -0.845401 | -1.242399 |                       |            |
| C                          | 1.500219  | -0.865216 | 0.811687  |                       |            |
| O                          | 2.128677  | -1.847296 | 1.137170  |                       |            |
| O                          | 0.607082  | -0.293911 | 1.622015  |                       |            |
| H                          | 0.271315  | 0.487655  | 1.123944  |                       |            |
| H                          | 3.510421  | -1.174323 | -1.034320 |                       |            |
| H                          | 3.169451  | 0.265172  | -2.010479 |                       |            |
| S                          | 4.199028  | 0.890513  | 0.044045  |                       |            |
| H                          | 4.144602  | 0.106330  | 1.140273  |                       |            |
| 28                         |           |           |           |                       |            |
| Dimer 13 of the n...n type |           |           |           |                       |            |
| C                          | 2.928047  | 0.602084  | 0.192906  |                       |            |
| C                          | 3.031131  | -0.399173 | -0.964194 |                       |            |
| N                          | 3.044244  | 0.053006  | 1.546764  |                       |            |
| H                          | 2.624646  | -0.872473 | 1.597651  |                       |            |
| H                          | 4.011111  | -0.022290 | 1.838759  |                       |            |
| H                          | 3.729375  | 1.338006  | 0.059580  |                       |            |
| C                          | 1.636895  | 1.433798  | 0.110462  |                       |            |
| O                          | 1.114858  | 1.778064  | -0.925036 |                       |            |
| O                          | 1.139950  | 1.772078  | 1.302921  |                       |            |
| H                          | 1.721221  | 1.303634  | 1.955696  |                       |            |
| H                          | 2.923300  | 0.118876  | -1.916011 |                       |            |
| H                          | 4.010599  | -0.876562 | -0.934281 |                       |            |
| S                          | 1.803452  | -1.773557 | -0.884430 |                       |            |
| H                          | 0.720428  | -1.061529 | -1.271778 |                       |            |
| C                          | -1.801996 | 0.769156  | 0.270025  |                       |            |
| C                          | -1.154202 | -0.313454 | 1.137658  |                       |            |
| N                          | -3.086564 | 1.293233  | 0.742963  |                       |            |
| H                          | -3.642456 | 0.556729  | 1.171130  |                       |            |
| H                          | -2.958305 | 2.029069  | 1.427098  |                       |            |
| H                          | -1.095889 | 1.602821  | 0.211692  |                       |            |
| C                          | -1.967035 | 0.317140  | -1.188426 |                       |            |
| O                          | -1.198081 | -0.421493 | -1.765615 |                       |            |
| O                          | -3.035067 | 0.835953  | -1.791325 |                       |            |
| H                          | -3.505888 | 1.332108  | -1.072828 |                       |            |
| H                          | -0.163578 | -0.563067 | 0.769845  |                       |            |
| H                          | -1.052211 | 0.062549  | 2.155175  |                       |            |
| S                          | -2.134376 | -1.869350 | 1.264093  |                       |            |
| H                          | -1.941643 | -2.259146 | -0.012574 |                       |            |
| 28                         |           |           |           |                       |            |
| Dimer 14 of the n...n type |           |           |           |                       |            |
| C                          | -2.492463 | -0.737212 | 0.845934  |                       |            |
| C                          | -3.090697 | 0.656887  | 0.630445  |                       |            |
| N                          | -1.288801 | -0.814151 | 1.678460  |                       |            |
| H                          | -0.709049 | 0.019220  | 1.603278  |                       |            |
| H                          | -1.517706 | -0.946304 | 2.655859  |                       |            |
| H                          | -3.267233 | -1.354092 | 1.315165  |                       |            |
| C                          | -2.209590 | -1.437552 | -0.496938 |                       |            |
| O                          | -2.898832 | -1.311993 | -1.483033 |                       |            |
| O                          | -1.128798 | -2.220474 | -0.468022 |                       |            |
| H                          | -0.765553 | -2.089379 | 0.447075  |                       |            |
| H                          | -4.032986 | 0.582202  | 0.089934  |                       |            |
| H                          | -3.279242 | 1.119925  | 1.599062  |                       |            |
| S                          | -1.980255 | 1.821197  | -0.274903 |                       |            |
| H                          | -2.134622 | 1.250609  | -1.486868 |                       |            |
| C                          | 1.307715  | 0.107590  | -0.615140 |                       |            |
| C                          | 1.858549  | -1.160455 | 0.046019  |                       |            |
| N                          | 1.891190  | 0.480181  | -1.904519 |                       |            |
| H                          | 2.866762  | 0.198403  | -1.958964 |                       |            |
| H                          | 1.393493  | 0.056178  | -2.677814 |                       |            |
| H                          | 0.235277  | -0.041311 | -0.763448 |                       |            |
| C                          | 1.389090  | 1.309044  | 0.340154  |                       |            |
| O                          | 1.155639  | 1.230121  | 1.527781  |                       |            |

| Nov 11, 22 15:56           |           |           |           | dimers_structures.xyz | Page 7/325 |
|----------------------------|-----------|-----------|-----------|-----------------------|------------|
| O                          | 1.713266  | 2.452097  | -0.253817 |                       |            |
| H                          | 1.859396  | 2.201004  | -1.203222 |                       |            |
| H                          | 1.350649  | -1.337941 | 0.992438  |                       |            |
| H                          | 1.685927  | -2.011513 | -0.612442 |                       |            |
| S                          | 3.677054  | -1.118812 | 0.348910  |                       |            |
| H                          | 3.643547  | -0.175186 | 1.312128  |                       |            |
| 28                         |           |           |           |                       |            |
| Dimer 15 of the n...n type |           |           |           |                       |            |
| C                          | 1.306489  | 0.107255  | -0.614514 |                       |            |
| C                          | 1.858168  | -1.159973 | 0.047466  |                       |            |
| N                          | 1.888804  | 0.478723  | -1.904757 |                       |            |
| H                          | 2.864324  | 0.196931  | -1.959859 |                       |            |
| H                          | 1.390361  | 0.054114  | -2.677236 |                       |            |
| H                          | 0.234038  | -0.042100 | -0.761904 |                       |            |
| C                          | 1.388377  | 1.309735  | 0.339458  |                       |            |
| O                          | 1.156241  | 1.231883  | 1.527404  |                       |            |
| O                          | 1.711466  | 2.452249  | -0.256153 |                       |            |
| H                          | 1.856763  | 2.200003  | -1.205392 |                       |            |
| H                          | 1.350860  | -1.336782 | 0.994336  |                       |            |
| H                          | 1.685530  | -2.011705 | -0.610119 |                       |            |
| S                          | 3.676823  | -1.117451 | 0.349259  |                       |            |
| H                          | 3.643615  | -0.172988 | 1.311655  |                       |            |
| C                          | -2.492237 | -0.737963 | 0.845166  |                       |            |
| C                          | -3.091882 | 0.655366  | 0.628548  |                       |            |
| N                          | -1.289656 | -0.813455 | 1.679325  |                       |            |
| H                          | -0.710201 | 0.020082  | 1.603695  |                       |            |
| H                          | -1.519839 | -0.944258 | 2.656603  |                       |            |
| H                          | -3.266928 | -1.355636 | 1.313515  |                       |            |
| C                          | -2.206919 | -1.438308 | -0.497086 |                       |            |
| O                          | -2.894291 | -1.312850 | -1.484478 |                       |            |
| O                          | -1.126132 | -2.221274 | -0.466216 |                       |            |
| H                          | -0.764320 | -2.090048 | 0.449336  |                       |            |
| H                          | -4.032786 | 0.579441  | 0.085808  |                       |            |
| H                          | -3.283246 | 1.117984  | 1.596815  |                       |            |
| S                          | -1.980823 | 1.821334  | -0.273762 |                       |            |
| H                          | -2.128458 | 1.249225  | -1.485858 |                       |            |
| 28                         |           |           |           |                       |            |
| Dimer 16 of the n...n type |           |           |           |                       |            |
| C                          | -2.949066 | -0.611656 | 0.168361  |                       |            |
| C                          | -3.012957 | 0.375413  | -1.004024 |                       |            |
| N                          | -3.145884 | -0.047276 | 1.506592  |                       |            |
| H                          | -2.772235 | 0.897366  | 1.560007  |                       |            |
| H                          | -4.125919 | -0.014323 | 1.759661  |                       |            |
| H                          | -3.726269 | -1.366384 | 0.002552  |                       |            |
| C                          | -1.636080 | -1.412797 | 0.158209  |                       |            |
| O                          | -1.079961 | -1.788787 | -0.848320 |                       |            |
| O                          | -1.161204 | -1.683402 | 1.376037  |                       |            |
| H                          | -1.780589 | -1.213522 | 1.992494  |                       |            |
| H                          | -2.852059 | -0.150762 | -1.943785 |                       |            |
| H                          | -3.999664 | 0.838059  | -1.025463 |                       |            |
| S                          | -1.808419 | 1.768280  | -0.881550 |                       |            |
| H                          | -0.704173 | 1.070901  | -1.235607 |                       |            |
| C                          | 1.818046  | -0.767765 | 0.292877  |                       |            |
| C                          | 1.199229  | 0.340767  | 1.148280  |                       |            |
| N                          | 3.112166  | -1.287676 | 0.744025  |                       |            |
| H                          | 3.686515  | -0.542767 | 1.131359  |                       |            |
| H                          | 2.998785  | -1.999914 | 1.455234  |                       |            |
| H                          | 1.105817  | -1.598112 | 0.275447  |                       |            |
| C                          | 1.946230  | -0.356888 | -1.181315 |                       |            |
| O                          | 1.173469  | 0.379731  | -1.755951 |                       |            |
| O                          | 2.987103  | -0.910045 | -1.801223 |                       |            |
| H                          | 3.473373  | -1.391406 | -1.083120 |                       |            |
| H                          | 0.198903  | 0.582753  | 0.802741  |                       |            |
| H                          | 1.124846  | -0.007295 | 2.178136  |                       |            |
| S                          | 2.189381  | 1.894677  | 1.206101  |                       |            |
| H                          | 1.965628  | 2.250340  | -0.075452 |                       |            |
| 28                         |           |           |           |                       |            |
| Dimer 17 of the n...n type |           |           |           |                       |            |
| C                          | -3.085244 | 0.199527  | 0.026518  |                       |            |

| Nov 11, 22 15:56           |           |           |           | dimers_structures.xyz | Page 8/325 |
|----------------------------|-----------|-----------|-----------|-----------------------|------------|
| C                          | -3.002971 | -1.331519 | 0.036782  |                       |            |
| N                          | -2.895797 | 0.871934  | -1.259273 |                       |            |
| H                          | -2.127181 | 0.452763  | -1.777172 |                       |            |
| H                          | -3.730180 | 0.821195  | -1.831454 |                       |            |
| H                          | -4.083591 | 0.468533  | 0.392573  |                       |            |
| C                          | -2.130897 | 0.830264  | 1.052917  |                       |            |
| O                          | -1.777524 | 0.284057  | 2.074207  |                       |            |
| O                          | -1.737129 | 2.063524  | 0.734997  |                       |            |
| H                          | -2.073720 | 2.208969  | -0.183085 |                       |            |
| H                          | -3.203074 | -1.706784 | 1.039648  |                       |            |
| H                          | -3.755951 | -1.732838 | -0.641959 |                       |            |
| S                          | -1.396487 | -2.017718 | -0.546318 |                       |            |
| H                          | -0.647826 | -1.607826 | 0.495986  |                       |            |
| C                          | 2.635765  | 0.518838  | 0.662534  |                       |            |
| C                          | 1.263184  | 1.132045  | 0.363810  |                       |            |
| N                          | 3.784560  | 1.123837  | -0.017399 |                       |            |
| H                          | 3.519006  | 1.476209  | -0.933698 |                       |            |
| H                          | 4.175455  | 1.890612  | 0.516258  |                       |            |
| H                          | 2.798766  | 0.599617  | 1.743040  |                       |            |
| C                          | 2.636916  | -0.995664 | 0.389759  |                       |            |
| O                          | 1.703261  | -1.723292 | 0.646733  |                       |            |
| O                          | 3.776303  | -1.448647 | -0.129772 |                       |            |
| H                          | 4.329797  | -0.633674 | -0.252164 |                       |            |
| H                          | 0.493818  | 0.616504  | 0.933796  |                       |            |
| H                          | 1.258334  | 2.180794  | 0.658486  |                       |            |
| S                          | 0.813534  | 1.121765  | -1.423907 |                       |            |
| H                          | 0.532470  | -0.195301 | -1.503202 |                       |            |
| 28                         |           |           |           |                       |            |
| Dimer 18 of the n...n type |           |           |           |                       |            |
| C                          | 1.828842  | 0.755758  | -0.331300 |                       |            |
| C                          | 1.229542  | -0.386360 | -1.155385 |                       |            |
| N                          | 3.137205  | 1.253009  | -0.766366 |                       |            |
| H                          | 3.724870  | 0.489243  | -1.092110 |                       |            |
| H                          | 3.046927  | 1.924090  | -1.519706 |                       |            |
| H                          | 1.120376  | 1.588446  | -0.371287 |                       |            |
| C                          | 1.911834  | 0.414186  | 1.163622  |                       |            |
| O                          | 1.132692  | -0.308995 | 1.746421  |                       |            |
| O                          | 2.920987  | 1.014868  | 1.792169  |                       |            |
| H                          | 3.428769  | 1.464895  | 1.069210  |                       |            |
| H                          | 0.214867  | -0.603322 | -0.835673 |                       |            |
| H                          | 1.193933  | -0.084826 | -2.202026 |                       |            |
| S                          | 2.208138  | -1.948095 | -1.111576 |                       |            |
| H                          | 1.947389  | -2.240476 | 0.178924  |                       |            |
| C                          | -2.943985 | 0.620462  | -0.159764 |                       |            |
| C                          | -2.981791 | -0.346208 | 1.031082  |                       |            |
| N                          | -3.189512 | 0.034625  | -1.480664 |                       |            |
| H                          | -2.840981 | -0.920010 | -1.523943 |                       |            |
| H                          | -4.176053 | 0.022135  | -1.708799 |                       |            |
| H                          | -3.706479 | 1.387155  | 0.018219  |                       |            |
| C                          | -1.621634 | 1.405084  | -0.203622 |                       |            |
| O                          | -1.042626 | 1.809770  | 0.778548  |                       |            |
| O                          | -1.166837 | 1.626008  | -1.438864 |                       |            |
| H                          | -1.808889 | 1.148593  | -2.026254 |                       |            |
| H                          | -2.774835 | 0.192302  | 1.954742  |                       |            |
| H                          | -3.975571 | -0.789086 | 1.098005  |                       |            |
| S                          | -1.810574 | -1.765628 | 0.887280  |                       |            |
| H                          | -0.679779 | -1.083759 | 1.184645  |                       |            |
| 28                         |           |           |           |                       |            |
| Dimer 19 of the n...n type |           |           |           |                       |            |
| C                          | 1.820497  | 0.765346  | -0.302181 |                       |            |
| C                          | 1.205242  | -0.350787 | -1.150154 |                       |            |
| N                          | 3.118318  | 1.278535  | -0.750427 |                       |            |
| H                          | 3.694632  | 0.528603  | -1.124923 |                       |            |
| H                          | 3.010627  | 1.982475  | -1.470726 |                       |            |
| H                          | 1.109604  | 1.597008  | -0.297847 |                       |            |
| C                          | 1.938554  | 0.370743  | 1.177291  |                       |            |
| O                          | 1.163068  | -0.360507 | 1.755089  |                       |            |
| O                          | 2.974112  | 0.932606  | 1.798342  |                       |            |
| H                          | 3.465498  | 1.405505  | 1.078149  |                       |            |

| Nov 11, 22 15:56 dimers_structures.xyz Page 9/325 |           |           |           |
|---------------------------------------------------|-----------|-----------|-----------|
| H                                                 | 0.201448  | -0.586139 | -0.810269 |
| H                                                 | 1.139724  | -0.013467 | -2.184215 |
| S                                                 | 2.191873  | -1.907646 | -1.184412 |
| H                                                 | 1.960329  | -2.247916 | 0.099941  |
| C                                                 | -2.948113 | 0.613918  | -0.164687 |
| C                                                 | -3.004370 | -0.368426 | 1.012161  |
| N                                                 | -3.158932 | 0.044459  | -1.498674 |
| H                                                 | -2.791705 | -0.902789 | -1.550390 |
| H                                                 | -4.141094 | 0.016538  | -1.743974 |
| H                                                 | -3.721322 | 1.371767  | 0.005378  |
| C                                                 | -1.632408 | 1.410714  | -0.169391 |
| O                                                 | -1.069417 | 1.793760  | 0.830643  |
| O                                                 | -1.163454 | 1.668752  | -1.392162 |
| H                                                 | -1.789348 | 1.197272  | -2.000885 |
| H                                                 | -2.831560 | 0.160726  | 1.948143  |
| H                                                 | -3.992764 | -0.826773 | 1.045418  |
| S                                                 | -1.807150 | -1.767214 | 0.882908  |
| H                                                 | -0.696227 | -1.071933 | 1.220437  |
| 28                                                |           |           |           |
| Dimer 20 of the n...n type                        |           |           |           |
| C                                                 | -1.525582 | -0.265653 | -0.043943 |
| C                                                 | -2.600814 | -1.016466 | -0.836054 |
| N                                                 | -1.234016 | -0.769648 | 1.298366  |
| H                                                 | -2.053791 | -1.197835 | 1.719476  |
| H                                                 | -0.480364 | -1.447204 | 1.262787  |
| H                                                 | -0.601527 | -0.329799 | -0.623473 |
| C                                                 | -1.841753 | 1.237267  | 0.034468  |
| O                                                 | -2.302305 | 1.874235  | -0.886158 |
| O                                                 | -1.545959 | 1.787051  | 1.212802  |
| H                                                 | -1.246205 | 1.021607  | 1.769129  |
| H                                                 | -2.699016 | -0.588443 | -1.832486 |
| H                                                 | -2.312303 | -2.063641 | -0.929043 |
| S                                                 | -4.257430 | -1.029846 | -0.022360 |
| H                                                 | -4.505710 | 0.287068  | -0.176253 |
| C                                                 | 2.923084  | -0.200486 | 0.743582  |
| C                                                 | 1.890308  | 0.932241  | 0.761871  |
| N                                                 | 4.273266  | 0.150478  | 0.298698  |
| H                                                 | 4.245958  | 0.891869  | -0.397020 |
| H                                                 | 4.854593  | 0.459292  | 1.068088  |
| H                                                 | 2.990312  | -0.591584 | 1.764936  |
| C                                                 | 2.422320  | -1.396222 | -0.088394 |
| O                                                 | 1.266720  | -1.764816 | -0.106246 |
| O                                                 | 3.378919  | -2.011767 | -0.774023 |
| H                                                 | 4.193046  | -1.469881 | -0.598763 |
| H                                                 | 0.941387  | 0.559109  | 1.138069  |
| H                                                 | 2.235707  | 1.725269  | 1.425233  |
| S                                                 | 1.631337  | 1.754243  | -0.867378 |
| H                                                 | 1.196279  | 0.666299  | -1.534492 |
| 28                                                |           |           |           |
| Dimer 21 of the n...n type                        |           |           |           |
| C                                                 | -3.113581 | 0.394002  | -0.078962 |
| C                                                 | -3.082963 | -1.020355 | 0.513997  |
| N                                                 | -3.294221 | 0.488463  | -1.530052 |
| H                                                 | -2.827790 | -0.280621 | -2.004839 |
| H                                                 | -4.273121 | 0.473865  | -1.789016 |
| H                                                 | -3.941632 | 0.930421  | 0.398418  |
| C                                                 | -1.861415 | 1.195114  | 0.311217  |
| O                                                 | -1.297616 | 1.100187  | 1.376265  |
| O                                                 | -1.440125 | 2.029473  | -0.645330 |
| H                                                 | -2.046168 | 1.853019  | -1.411918 |
| H                                                 | -2.965431 | -0.972753 | 1.595431  |
| H                                                 | -4.025140 | -1.519286 | 0.286800  |
| S                                                 | -1.756452 | -2.103406 | -0.181466 |
| H                                                 | -0.748878 | -1.673480 | 0.607850  |
| C                                                 | 1.317144  | 0.302509  | -0.320599 |
| C                                                 | 2.193048  | -0.654560 | -1.138695 |
| N                                                 | 1.622166  | 1.725402  | -0.486015 |
| H                                                 | 2.413311  | 1.886847  | -1.098580 |
| H                                                 | 0.814342  | 2.234174  | -0.825205 |

| Nov 11, 22 15:56 dimers_structures.xyz Page 10/325 |           |           |           |
|----------------------------------------------------|-----------|-----------|-----------|
| H                                                  | 0.288044  | 0.096537  | -0.618286 |
| C                                                  | 1.407859  | -0.058084 | 1.172930  |
| O                                                  | 1.135372  | -1.160144 | 1.604846  |
| O                                                  | 1.843380  | 0.931320  | 1.938935  |
| H                                                  | 1.939354  | 1.690895  | 1.297783  |
| H                                                  | 1.895622  | -1.682206 | -0.934141 |
| H                                                  | 2.049562  | -0.454378 | -2.200961 |
| S                                                  | 4.008510  | -0.479845 | -0.854372 |
| H                                                  | 4.010743  | -0.906511 | 0.425477  |
| 28                                                 |           |           |           |
| Dimer 22 of the n...n type                         |           |           |           |
| C                                                  | -1.643365 | -0.178708 | 0.627496  |
| C                                                  | -3.145851 | -0.239540 | 0.919451  |
| N                                                  | -1.015635 | 1.139423  | 0.737716  |
| H                                                  | -1.681946 | 1.886832  | 0.567111  |
| H                                                  | -0.592100 | 1.266916  | 1.648418  |
| H                                                  | -1.143274 | -0.850018 | 1.330373  |
| C                                                  | -1.323549 | -0.782459 | -0.751295 |
| O                                                  | -1.855211 | -1.778516 | -1.186624 |
| O                                                  | -0.376544 | -0.124938 | -1.423986 |
| H                                                  | -0.171138 | 0.662963  | -0.858930 |
| H                                                  | -3.498472 | -1.266950 | 0.844441  |
| H                                                  | -3.332450 | 0.124854  | 1.929740  |
| S                                                  | -4.169178 | 0.828271  | -0.185997 |
| H                                                  | -3.954795 | 0.120331  | -1.313911 |
| C                                                  | 2.923271  | -0.683011 | 0.141587  |
| C                                                  | 3.436753  | 0.760341  | 0.160883  |
| N                                                  | 2.630242  | -1.279536 | -1.162008 |
| H                                                  | 2.091444  | -0.639510 | -1.740989 |
| H                                                  | 3.478300  | -1.526691 | -1.657944 |
| H                                                  | 3.698284  | -1.300024 | 0.613816  |
| C                                                  | 1.696073  | -0.883193 | 1.042988  |
| O                                                  | 1.417820  | -0.189367 | 1.994125  |
| O                                                  | 0.955897  | -1.940846 | 0.697747  |
| H                                                  | 1.335100  | -2.247247 | -0.162979 |
| H                                                  | 3.641721  | 1.068073  | 1.185613  |
| H                                                  | 4.364278  | 0.813385  | -0.409785 |
| S                                                  | 2.311620  | 1.994538  | -0.617167 |
| H                                                  | 1.368592  | 1.968925  | 0.345231  |
| 28                                                 |           |           |           |
| Dimer 23 of the n...n type                         |           |           |           |
| C                                                  | 2.692755  | -0.504102 | -0.632530 |
| C                                                  | 1.362977  | -1.221590 | -0.373672 |
| N                                                  | 3.848442  | -0.974450 | 0.136531  |
| H                                                  | 3.560881  | -1.322748 | 1.047650  |
| H                                                  | 4.345805  | -1.713771 | -0.344349 |
| H                                                  | 2.921170  | -0.619118 | -1.697831 |
| C                                                  | 2.549791  | 1.016075  | -0.435742 |
| O                                                  | 1.583340  | 1.650775  | -0.797216 |
| O                                                  | 3.604794  | 1.585930  | 0.142763  |
| H                                                  | 4.214268  | 0.826731  | 0.339527  |
| H                                                  | 0.579165  | -0.794032 | -0.994552 |
| H                                                  | 1.464019  | -2.276548 | -0.627319 |
| S                                                  | 0.828769  | -1.192612 | 1.390977  |
| H                                                  | 0.433961  | 0.097965  | 1.415874  |
| C                                                  | -3.065626 | -0.227143 | -0.054585 |
| C                                                  | -3.018923 | 1.302573  | 0.027154  |
| N                                                  | -2.894559 | -0.970162 | 1.194440  |
| H                                                  | -2.151916 | -0.564874 | 1.758605  |
| H                                                  | -3.745420 | -0.972860 | 1.744207  |
| H                                                  | -4.048619 | -0.494862 | -0.461176 |
| C                                                  | -2.074716 | -0.779311 | -1.091220 |
| O                                                  | -1.696494 | -0.165438 | -2.063760 |
| O                                                  | -1.681246 | -2.029432 | -0.845087 |
| H                                                  | -2.033421 | -2.234757 | 0.055122  |
| H                                                  | -3.215525 | 1.733027  | -0.954000 |
| H                                                  | -3.789483 | 1.644819  | 0.718296  |
| S                                                  | -1.434960 | 1.991145  | 0.668426  |
| H                                                  | -0.673709 | 1.673106  | -0.397334 |

| Nov 11, 22 15:56           | dimers_structures.xyz         | Page 11/325 |
|----------------------------|-------------------------------|-------------|
| 28                         |                               |             |
| Dimer 24 of the n...n type |                               |             |
| C                          | 2.113182 -0.217223 0.794167   |             |
| C                          | 1.962636 1.275719 0.483456    |             |
| N                          | 3.382468 -0.641282 1.389431   |             |
| H                          | 4.159036 -0.111158 1.001186   |             |
| H                          | 3.383661 -0.511302 2.393956   |             |
| H                          | 1.310010 -0.488835 1.488765   |             |
| C                          | 1.838835 -1.078935 -0.447932  |             |
| O                          | 1.045810 -0.779230 -1.312882  |             |
| O                          | 2.532455 -2.216390 -0.477394  |             |
| H                          | 3.134983 -2.159350 0.307090   |             |
| H                          | 0.962762 1.483610 0.109781    |             |
| S                          | 2.112740 1.847541 1.399265    |             |
| H                          | 3.206182 1.920432 -0.717660   |             |
| H                          | 2.719046 1.264630 -1.790630   |             |
| C                          | -1.878065 0.015845 -0.712786  |             |
| C                          | -2.971815 1.083151 -0.606303  |             |
| N                          | -2.258915 -1.249632 -1.343913 |             |
| H                          | -3.242502 -1.455190 -1.190188 |             |
| H                          | -2.084199 -1.238756 -2.340929 |             |
| H                          | -1.048387 0.442451 -1.283049  |             |
| C                          | -1.259299 -0.283367 0.660886  |             |
| O                          | -1.019240 0.568369 1.489087   |             |
| O                          | -0.959316 -1.566123 0.851937  |             |
| H                          | -1.265509 -2.009655 0.016824  |             |
| H                          | -2.565328 1.990351 -0.161660  |             |
| H                          | -3.346196 1.316930 -1.603059  |             |
| S                          | -4.449682 0.550256 0.363813   |             |
| H                          | -3.829488 0.504968 1.560664   |             |
| 28                         |                               |             |
| Dimer 25 of the n...n type |                               |             |
| C                          | -1.557540 -0.327594 0.122470  |             |
| C                          | -1.587257 1.092230 -0.451704  |             |
| N                          | -1.614251 -1.426394 -0.844131 |             |
| H                          | -2.057225 -1.142712 -1.712691 |             |
| H                          | -0.699501 -1.816171 -1.041029 |             |
| H                          | -0.630896 -0.407996 0.696715  |             |
| C                          | -2.680108 -0.517182 1.159935  |             |
| O                          | -2.994176 0.326720 1.970334   |             |
| O                          | -3.266164 -1.711537 1.099099  |             |
| H                          | -2.829081 -2.148152 0.318308  |             |
| H                          | -1.511531 1.815605 0.356652   |             |
| H                          | -0.737477 1.240808 -1.115311  |             |
| S                          | -3.082022 1.460366 -1.469735  |             |
| H                          | -3.967553 1.430519 -0.452621  |             |
| C                          | 2.854528 0.594612 -0.609847   |             |
| C                          | 1.946099 -0.480625 -1.215584  |             |
| N                          | 4.265647 0.245261 -0.440638   |             |
| H                          | 4.372318 -0.738360 -0.205262  |             |
| H                          | 4.800832 0.428676 -1.280602   |             |
| H                          | 2.799149 1.469325 -1.267623   |             |
| C                          | 2.299991 1.096738 0.736246    |             |
| O                          | 1.116852 1.194000 0.976022    |             |
| C                          | 3.242428 1.440881 1.610768    |             |
| H                          | 4.094639 1.199118 1.165543    |             |
| H                          | 0.939440 -0.087573 -1.337460  |             |
| H                          | 2.325446 -0.766289 -2.196700  |             |
| S                          | 1.875836 -2.050616 -0.250468  |             |
| H                          | 1.394842 -1.514440 0.889830   |             |
| 28                         |                               |             |
| Dimer 26 of the n...n type |                               |             |
| C                          | -2.927298 -0.017988 0.638196  |             |
| C                          | -2.272256 -1.379399 0.374802  |             |
| N                          | -3.952315 0.405390 -0.319650  |             |
| H                          | -3.764087 0.023153 -1.243206  |             |
| H                          | -4.878250 0.110198 -0.035294  |             |
| H                          | -3.385816 -0.066900 1.631908  |             |
| C                          | -1.874684 1.099372 0.768550   |             |

| Nov 11, 22 15:56           | dimers_structures.xyz         | Page 12/325 |
|----------------------------|-------------------------------|-------------|
| O                          | -0.823265 0.965617 1.356819   |             |
| O                          | -2.242057 2.249980 0.213938   |             |
| H                          | -3.124021 2.049662 -0.198389  |             |
| H                          | -1.522829 -1.588719 1.136284  |             |
| H                          | -3.035132 -2.157102 0.416231  |             |
| S                          | -1.508391 -1.536564 -1.295341 |             |
| H                          | -0.588182 -0.555989 -1.159385 |             |
| C                          | 2.927370 -0.018212 -0.638046  |             |
| C                          | 2.272106 -1.379584 -0.374778  |             |
| N                          | 3.952283 0.405078 0.319925    |             |
| H                          | 3.763357 0.023554 1.243635    |             |
| H                          | 4.878075 0.108864 0.036158    |             |
| H                          | 3.386075 -0.067143 -1.631672  |             |
| C                          | 1.874947 1.099265 -0.768549   |             |
| O                          | 0.823417 0.965631 -1.356615   |             |
| O                          | 2.242572 2.250022 -0.214281   |             |
| H                          | 3.124499 2.049838 0.198027    |             |
| H                          | 1.522896 -1.588864 -1.136470  |             |
| H                          | 3.034974 -2.157308 -0.416033  |             |
| S                          | 1.508015 -1.536658 1.295165   |             |
| H                          | 0.588226 -0.555704 1.159173   |             |
| 28                         |                               |             |
| Dimer 27 of the n...n type |                               |             |
| C                          | 3.137619 -0.489123 0.565300   |             |
| C                          | 2.563499 0.865442 1.004198    |             |
| N                          | 4.351287 -0.442108 -0.256631  |             |
| H                          | 4.377725 0.405260 -0.818251   |             |
| H                          | 5.191622 -0.477760 0.307052   |             |
| H                          | 3.361840 -1.056219 1.475417   |             |
| C                          | 2.078044 -1.339206 -0.157934  |             |
| O                          | 0.932877 -1.442030 0.220404   |             |
| O                          | 2.542574 -1.990361 -1.223301  |             |
| H                          | 3.495363 -1.714699 -1.278866  |             |
| H                          | 1.634483 0.721633 1.553489    |             |
| H                          | 3.287431 1.365018 1.648100    |             |
| S                          | 2.239376 2.033227 -0.387719   |             |
| H                          | 1.042515 1.525200 -0.755578   |             |
| C                          | -2.124305 -0.826276 0.306304  |             |
| C                          | -3.270910 -0.906718 -0.706742 |             |
| N                          | -2.498881 -0.884589 1.721575  |             |
| H                          | -3.405643 -0.451725 1.878069  |             |
| H                          | -2.540133 -1.838713 2.058262  |             |
| H                          | -1.439190 -1.652961 0.100065  |             |
| C                          | -1.261893 0.421691 0.071368   |             |
| O                          | -0.988780 0.848426 -1.031013  |             |
| O                          | -0.818132 0.994083 1.186728   |             |
| H                          | -1.212498 0.446903 1.913930   |             |
| H                          | -2.875248 -0.898663 -1.721259 |             |
| H                          | -3.824339 -1.833044 -0.552087 |             |
| S                          | -4.516634 0.446058 -0.539190  |             |
| H                          | -3.705276 1.442289 -0.949944  |             |
| 28                         |                               |             |
| Dimer 28 of the n...n type |                               |             |
| C                          | -3.132448 -0.428296 -0.266063 |             |
| C                          | -3.229167 0.898264 0.495595   |             |
| N                          | -3.120123 -1.649251 0.543528  |             |
| H                          | -2.612566 -1.503084 1.412984  |             |
| H                          | -4.057507 -1.956841 0.772761  |             |
| H                          | -3.996510 -0.481140 -0.938439 |             |
| C                          | -1.915757 -0.450182 -1.206165 |             |
| O                          | -1.503204 0.518716 -1.800510  |             |
| O                          | -1.357612 -1.658068 -1.330660 |             |
| H                          | -1.882751 -2.233052 -0.714505 |             |
| H                          | -3.270195 1.731670 -0.203994  |             |
| H                          | -4.139074 0.899398 1.095743   |             |
| S                          | -1.845736 1.188237 1.683488   |             |
| H                          | -0.917062 1.530105 0.763907   |             |
| C                          | 2.077105 -0.880214 -0.277015  |             |
| C                          | 1.726834 0.144956 -1.360755   |             |

| Nov 11, 22 15:56           |           |           |           | dimers_structures.xyz | Page 13/325 |
|----------------------------|-----------|-----------|-----------|-----------------------|-------------|
| N                          | 1.047182  | -1.169977 | 0.722822  |                       |             |
| H                          | 0.542394  | -0.326867 | 0.983272  |                       |             |
| H                          | 0.368989  | -1.827693 | 0.360294  |                       |             |
| H                          | 2.310346  | -1.819837 | -0.791647 |                       |             |
| C                          | 3.381942  | -0.513389 | 0.450958  |                       |             |
| O                          | 4.317175  | 0.041570  | -0.080391 |                       |             |
| O                          | 3.406072  | -0.892113 | 1.730030  |                       |             |
| H                          | 2.502627  | -1.264202 | 1.895567  |                       |             |
| H                          | 2.552093  | 0.235339  | -2.065669 |                       |             |
| H                          | 0.833361  | -0.178705 | -1.891205 |                       |             |
| S                          | 1.308411  | 1.819876  | -0.715705 |                       |             |
| H                          | 2.523141  | 2.092026  | -0.195112 |                       |             |
| 28                         |           |           |           |                       |             |
| Dimer 29 of the n...n type |           |           |           |                       |             |
| C                          | 3.100110  | 1.027208  | -0.017870 |                       |             |
| C                          | 3.865272  | -0.259013 | -0.352273 |                       |             |
| N                          | 2.922043  | 1.338921  | 1.401846  |                       |             |
| H                          | 2.802476  | 0.487322  | 1.945438  |                       |             |
| H                          | 3.715944  | 1.843730  | 1.776872  |                       |             |
| H                          | 3.646470  | 1.858303  | -0.478554 |                       |             |
| C                          | 1.724012  | 1.056398  | -0.705455 |                       |             |
| O                          | 1.504620  | 0.581148  | -1.796968 |                       |             |
| O                          | 0.784898  | 1.687716  | 0.000044  |                       |             |
| H                          | 1.228935  | 1.907372  | 0.859642  |                       |             |
| H                          | 3.934842  | -0.379170 | -1.432383 |                       |             |
| H                          | 4.872396  | -0.195960 | 0.060216  |                       |             |
| S                          | 3.130350  | -1.782718 | 0.381797  |                       |             |
| H                          | 1.975060  | -1.752198 | -0.313790 |                       |             |
| C                          | -2.707200 | 0.537278  | -0.597002 |                       |             |
| C                          | -1.610843 | -0.442298 | -1.028133 |                       |             |
| N                          | -2.285147 | 1.632846  | 0.281620  |                       |             |
| H                          | -1.540031 | 1.314330  | 0.896677  |                       |             |
| H                          | -1.902495 | 2.400507  | -0.257436 |                       |             |
| H                          | -3.129732 | 0.977202  | -1.507735 |                       |             |
| C                          | -3.889099 | -0.196103 | 0.060682  |                       |             |
| O                          | -4.289207 | -1.282201 | -0.294850 |                       |             |
| O                          | -4.457988 | 0.489926  | 1.052664  |                       |             |
| H                          | -3.893763 | 1.302283  | 1.140619  |                       |             |
| H                          | -2.016560 | -1.186953 | -1.711190 |                       |             |
| H                          | -0.810100 | 0.101552  | -1.525692 |                       |             |
| S                          | -0.801900 | -1.310577 | 0.384482  |                       |             |
| H                          | -1.829009 | -2.141504 | 0.655791  |                       |             |
| 28                         |           |           |           |                       |             |
| Dimer 30 of the n...n type |           |           |           |                       |             |
| C                          | 2.923512  | -0.322064 | 0.702128  |                       |             |
| C                          | 2.350288  | 1.098524  | 0.780492  |                       |             |
| N                          | 4.079775  | -0.504347 | -0.179524 |                       |             |
| H                          | 4.033600  | 0.136578  | -0.968250 |                       |             |
| H                          | 4.953266  | -0.349114 | 0.308559  |                       |             |
| H                          | 3.218388  | -0.612383 | 1.717228  |                       |             |
| C                          | 1.859760  | -1.362034 | 0.315148  |                       |             |
| O                          | 0.708943  | -1.345742 | 0.716107  |                       |             |
| O                          | 2.309171  | -2.324367 | -0.469394 |                       |             |
| H                          | 3.253644  | -2.061109 | -0.653663 |                       |             |
| H                          | 1.518836  | 1.136451  | 1.481967  |                       |             |
| H                          | 3.131357  | 1.766667  | 1.143938  |                       |             |
| S                          | 1.817340  | 1.789444  | -0.843302 |                       |             |
| H                          | 0.738390  | 0.963794  | -1.047850 |                       |             |
| C                          | -2.049717 | 0.666992  | -0.859753 |                       |             |
| C                          | -3.378882 | -0.121313 | -0.820094 |                       |             |
| N                          | -0.904335 | -0.071782 | -1.379440 |                       |             |
| H                          | -0.861379 | -1.014972 | -1.001423 |                       |             |
| H                          | -0.974880 | -0.155378 | -2.388309 |                       |             |
| H                          | -2.215236 | 1.530820  | -1.507907 |                       |             |
| C                          | -1.808591 | 1.272743  | 0.529666  |                       |             |
| O                          | -2.486493 | 2.198730  | 0.920778  |                       |             |
| O                          | -0.893591 | 0.730718  | 1.333041  |                       |             |
| H                          | -0.381011 | -0.022145 | 0.957334  |                       |             |
| H                          | -4.189598 | 0.520357  | -0.475122 |                       |             |

| Nov 11, 22 15:56           |           |           |           | dimers_structures.xyz | Page 14/325 |
|----------------------------|-----------|-----------|-----------|-----------------------|-------------|
| H                          | -3.610509 | -0.467547 | -1.828115 |                       |             |
| S                          | -3.322581 | -1.650347 | 0.210533  |                       |             |
| H                          | -3.241549 | -1.036474 | 1.408890  |                       |             |
| 28                         |           |           |           |                       |             |
| Dimer 31 of the n...n type |           |           |           |                       |             |
| C                          | -1.801341 | -0.105094 | -0.738074 |                       |             |
| C                          | -2.454817 | 1.200429  | -0.273037 |                       |             |
| N                          | -2.591493 | -0.945579 | -1.640676 |                       |             |
| H                          | -3.582841 | -0.884290 | -1.421874 |                       |             |
| H                          | -2.463717 | -0.676501 | -2.608591 |                       |             |
| H                          | -0.868130 | 0.148960  | -1.248639 |                       |             |
| C                          | -1.340297 | -0.954314 | 0.457434  |                       |             |
| O                          | -0.886657 | -0.481839 | 1.477373  |                       |             |
| O                          | -1.462157 | -2.265840 | 0.269895  |                       |             |
| H                          | -1.884513 | -2.347830 | -0.622867 |                       |             |
| H                          | -1.766044 | 1.766164  | 0.352843  |                       |             |
| H                          | -2.712876 | 1.804163  | -1.143199 |                       |             |
| S                          | -4.034605 | 0.960170  | 0.650202  |                       |             |
| H                          | -3.478478 | 0.391169  | 1.739320  |                       |             |
| C                          | 2.195437  | -0.106052 | 0.862547  |                       |             |
| C                          | 1.632406  | 1.276923  | 0.521295  |                       |             |
| N                          | 3.573870  | -0.143905 | 1.357777  |                       |             |
| H                          | 4.145382  | 0.555471  | 0.889683  |                       |             |
| H                          | 3.616293  | 0.030603  | 2.354541  |                       |             |
| H                          | 1.540582  | -0.533713 | 1.629058  |                       |             |
| C                          | 2.073169  | -1.078955 | -0.320581 |                       |             |
| O                          | 1.162354  | -1.061139 | -1.118892 |                       |             |
| O                          | 3.053704  | -1.979727 | -0.378329 |                       |             |
| H                          | 3.675211  | -1.714630 | 0.346983  |                       |             |
| H                          | 0.577236  | 1.202142  | 0.277214  |                       |             |
| H                          | 1.735350  | 1.925827  | 1.391187  |                       |             |
| S                          | 2.517565  | 2.137217  | -0.849209 |                       |             |
| H                          | 2.097237  | 1.311389  | -1.829129 |                       |             |
| 28                         |           |           |           |                       |             |
| Dimer 32 of the n...n type |           |           |           |                       |             |
| C                          | -1.626377 | -0.353966 | -0.611017 |                       |             |
| C                          | -2.091410 | 1.079447  | -0.340009 |                       |             |
| N                          | -2.385746 | -1.110715 | -1.609101 |                       |             |
| H                          | -3.373643 | -0.871407 | -1.571901 |                       |             |
| H                          | -2.051767 | -0.927417 | -2.547577 |                       |             |
| H                          | -0.587551 | -0.313829 | -0.946059 |                       |             |
| C                          | -1.544609 | -1.177467 | 0.683280  |                       |             |
| O                          | -1.224507 | -0.712458 | 1.755281  |                       |             |
| O                          | -1.833098 | -2.467302 | 0.519578  |                       |             |
| H                          | -2.103269 | -2.539978 | -0.431104 |                       |             |
| H                          | -1.427169 | 1.568186  | 0.369224  |                       |             |
| H                          | -2.072416 | 1.645043  | -1.271437 |                       |             |
| S                          | -3.825054 | 1.196177  | 0.282272  |                       |             |
| H                          | -3.582758 | 0.630881  | 1.482665  |                       |             |
| C                          | 2.698467  | 0.054412  | 0.816629  |                       |             |
| C                          | 1.561165  | 1.081631  | 0.827648  |                       |             |
| N                          | 4.052437  | 0.575991  | 0.615025  |                       |             |
| H                          | 4.040564  | 1.379530  | -0.008532 |                       |             |
| H                          | 4.478432  | 0.860606  | 1.488701  |                       |             |
| H                          | 2.674745  | -0.462681 | 1.782576  |                       |             |
| C                          | 2.438073  | -1.058276 | -0.215043 |                       |             |
| O                          | 1.337451  | -1.499230 | -0.463685 |                       |             |
| O                          | 3.542676  | -1.519198 | -0.797716 |                       |             |
| H                          | 4.268309  | -0.945179 | -0.439258 |                       |             |
| H                          | 0.616638  | 0.588422  | 1.046512  |                       |             |
| H                          | 1.752371  | 1.819786  | 1.607020  |                       |             |
| S                          | 1.413396  | 2.060760  | -0.728557 |                       |             |
| H                          | 1.095165  | 1.030929  | -1.538330 |                       |             |
| 28                         |           |           |           |                       |             |
| Dimer 33 of the n...n type |           |           |           |                       |             |
| C                          | 1.703060  | 0.526640  | 0.078905  |                       |             |
| C                          | 1.096564  | -0.835401 | -0.270503 |                       |             |
| N                          | 1.999299  | 1.420225  | -1.042084 |                       |             |
| H                          | 2.346362  | 0.890528  | -1.838414 |                       |             |



| Nov 11, 22 15:56           |           |           |           | dimers_structures.xyz | Page 15/325 |
|----------------------------|-----------|-----------|-----------|-----------------------|-------------|
| H                          | 1.156604  | 1.903617  | -1.330986 |                       |             |
| H                          | 0.982289  | 1.038450  | 0.726581  |                       |             |
| C                          | 2.962268  | 0.376431  | 0.944309  |                       |             |
| O                          | 3.118520  | -0.501466 | 1.763713  |                       |             |
| O                          | 3.870960  | 1.331775  | 0.736541  |                       |             |
| H                          | 3.500583  | 1.863260  | -0.013949 |                       |             |
| H                          | 0.895781  | -1.400038 | 0.638181  |                       |             |
| H                          | 0.160464  | -0.683959 | -0.805499 |                       |             |
| S                          | 2.142246  | -1.865625 | -1.386258 |                       |             |
| H                          | 3.123231  | -2.099996 | -0.490564 |                       |             |
| C                          | -3.121046 | 0.748349  | -0.180830 |                       |             |
| C                          | -3.498216 | -0.299610 | 0.872092  |                       |             |
| N                          | -3.161777 | 0.314316  | -1.579559 |                       |             |
| H                          | -2.876728 | -0.658238 | -1.666991 |                       |             |
| H                          | -4.089691 | 0.408193  | -1.974456 |                       |             |
| H                          | -3.814363 | 1.589938  | -0.069412 |                       |             |
| C                          | -1.735552 | 1.351922  | 0.102150  |                       |             |
| O                          | -1.286520 | 1.532800  | 1.211159  |                       |             |
| O                          | -1.060069 | 1.676032  | -1.002587 |                       |             |
| H                          | -1.633221 | 1.355011  | -1.747604 |                       |             |
| H                          | -3.503860 | 0.147751  | 1.864789  |                       |             |
| H                          | -4.494999 | -0.683265 | 0.654428  |                       |             |
| S                          | -2.384265 | -1.771748 | 0.887777  |                       |             |
| H                          | -1.328402 | -1.138182 | 1.433735  |                       |             |
| 28                         |           |           |           |                       |             |
| Dimer 34 of the n...n type |           |           |           |                       |             |
| C                          | 2.921826  | 0.518305  | 0.680027  |                       |             |
| C                          | 3.152887  | -0.997919 | 0.666631  |                       |             |
| N                          | 1.960441  | 1.018802  | 1.666779  |                       |             |
| H                          | 1.261866  | 0.311547  | 1.876257  |                       |             |
| H                          | 2.415304  | 1.273130  | 2.535079  |                       |             |
| H                          | 3.890019  | 0.992984  | 0.872825  |                       |             |
| C                          | 2.522294  | 1.022875  | -0.718825 |                       |             |
| O                          | 2.999288  | 0.597693  | -1.745580 |                       |             |
| O                          | 1.607669  | 1.994652  | -0.702277 |                       |             |
| H                          | 1.357638  | 2.092375  | 0.252225  |                       |             |
| H                          | 3.890238  | -1.255223 | -0.091940 |                       |             |
| H                          | 3.523075  | -1.316090 | 1.641249  |                       |             |
| S                          | 1.621630  | -1.987631 | 0.378179  |                       |             |
| H                          | 1.396479  | -1.560918 | -0.881320 |                       |             |
| C                          | -1.584547 | -0.009333 | 0.580657  |                       |             |
| C                          | -3.001897 | -0.334168 | 1.066582  |                       |             |
| N                          | -1.210665 | 1.403981  | 0.553726  |                       |             |
| H                          | -2.001647 | 1.981993  | 0.281141  |                       |             |
| H                          | -0.888385 | 1.720811  | 1.460220  |                       |             |
| H                          | -0.886431 | -0.534570 | 1.241629  |                       |             |
| C                          | -1.313981 | -0.637474 | -0.795743 |                       |             |
| O                          | -1.747090 | -1.716856 | -1.130900 |                       |             |
| O                          | -0.517884 | 0.081441  | -1.588244 |                       |             |
| H                          | -0.323994 | 0.916889  | -1.100182 |                       |             |
| H                          | -3.152054 | -1.412228 | 1.096166  |                       |             |
| H                          | -3.138084 | 0.068414  | 2.070398  |                       |             |
| S                          | -4.332423 | 0.429647  | 0.041273  |                       |             |
| H                          | -4.135133 | -0.340020 | -1.048494 |                       |             |
| 28                         |           |           |           |                       |             |
| Dimer 35 of the n...n type |           |           |           |                       |             |
| C                          | -3.137046 | -0.010089 | -0.026388 |                       |             |
| C                          | -2.709890 | 0.647826  | -1.344085 |                       |             |
| N                          | -3.247034 | 0.867420  | 1.141444  |                       |             |
| H                          | -2.506954 | 1.565688  | 1.136306  |                       |             |
| H                          | -4.136839 | 1.350913  | 1.162984  |                       |             |
| H                          | -4.119773 | -0.466706 | -0.193691 |                       |             |
| C                          | -2.225191 | -1.191027 | 0.338870  |                       |             |
| O                          | -1.667280 | -1.893757 | -0.475313 |                       |             |
| O                          | -2.104689 | -1.392941 | 1.651038  |                       |             |
| H                          | -2.578979 | -0.628281 | 2.065238  |                       |             |
| H                          | -2.695855 | -0.089426 | -2.145445 |                       |             |
| H                          | -3.426915 | 1.428103  | -1.599833 |                       |             |
| S                          | -1.066601 | 1.481454  | -1.267174 |                       |             |

| Nov 11, 22 15:56           |           |           |           | dimers_structures.xyz | Page 16/325 |
|----------------------------|-----------|-----------|-----------|-----------------------|-------------|
| H                          | -0.314726 | 0.363265  | -1.340603 |                       |             |
| C                          | 2.197407  | -0.421148 | 1.102535  |                       |             |
| C                          | 2.814581  | -1.322090 | 0.025891  |                       |             |
| N                          | 0.751833  | -0.562306 | 1.281209  |                       |             |
| H                          | 0.321605  | -1.013937 | 0.481281  |                       |             |
| H                          | 0.504462  | -1.096097 | 2.104369  |                       |             |
| H                          | 2.705481  | -0.645153 | 2.046214  |                       |             |
| C                          | 2.529761  | 1.057425  | 0.816054  |                       |             |
| O                          | 3.635548  | 1.441394  | 0.502676  |                       |             |
| O                          | 1.493189  | 1.878971  | 0.951073  |                       |             |
| H                          | 0.727887  | 1.277086  | 1.158532  |                       |             |
| H                          | 3.888907  | -1.156039 | -0.032064 |                       |             |
| H                          | 2.630702  | -2.366753 | 0.277128  |                       |             |
| S                          | 2.080293  | -1.084331 | -1.653478 |                       |             |
| H                          | 2.576454  | 0.152865  | -1.861605 |                       |             |
| 28                         |           |           |           |                       |             |
| Dimer 36 of the n...n type |           |           |           |                       |             |
| C                          | -3.184756 | 0.421974  | 0.562816  |                       |             |
| C                          | -2.794173 | -1.050821 | 0.756892  |                       |             |
| N                          | -3.987402 | 0.727923  | -0.623756 |                       |             |
| H                          | -3.845905 | 0.033531  | -1.352670 |                       |             |
| H                          | -4.976005 | 0.774915  | -0.411860 |                       |             |
| H                          | -3.737913 | 0.732389  | 1.454978  |                       |             |
| C                          | -1.922953 | 1.302525  | 0.551246  |                       |             |
| O                          | -1.006944 | 1.174142  | 1.333113  |                       |             |
| O                          | -1.908522 | 2.219015  | -0.415206 |                       |             |
| H                          | -2.765465 | 2.072824  | -0.900295 |                       |             |
| H                          | -2.164737 | -1.152700 | 1.639978  |                       |             |
| H                          | -3.693116 | -1.651780 | 0.893513  |                       |             |
| S                          | -1.935086 | -1.797196 | -0.696456 |                       |             |
| H                          | -0.855516 | -0.992291 | -0.674962 |                       |             |
| C                          | 1.801084  | 0.634589  | 0.231627  |                       |             |
| C                          | 1.510479  | -0.703696 | 0.921137  |                       |             |
| N                          | 1.141284  | 0.882117  | -1.050175 |                       |             |
| H                          | 1.035272  | 0.032517  | -1.596970 |                       |             |
| H                          | 0.243872  | 1.336650  | -0.942417 |                       |             |
| H                          | 1.478910  | 1.419207  | 0.923067  |                       |             |
| C                          | 3.316514  | 0.846590  | 0.058840  |                       |             |
| O                          | 4.143495  | 0.481752  | 0.864638  |                       |             |
| O                          | 3.643513  | 1.499458  | -1.057012 |                       |             |
| H                          | 2.780095  | 1.618605  | -1.530869 |                       |             |
| H                          | 2.073343  | -0.767578 | 1.850957  |                       |             |
| H                          | 0.450096  | -0.765681 | 1.157625  |                       |             |
| S                          | 1.893797  | -2.181543 | -0.113511 |                       |             |
| H                          | 3.231027  | -2.002955 | -0.132701 |                       |             |
| 28                         |           |           |           |                       |             |
| Dimer 37 of the n...n type |           |           |           |                       |             |
| C                          | 3.091427  | 0.187923  | -0.684764 |                       |             |
| C                          | 2.008282  | -0.678518 | -1.338916 |                       |             |
| N                          | 4.239124  | -0.523991 | -0.116958 |                       |             |
| H                          | 3.954322  | -1.423295 | 0.263642  |                       |             |
| H                          | 4.959107  | -0.687692 | -0.810141 |                       |             |
| H                          | 3.465319  | 0.875897  | -1.451431 |                       |             |
| C                          | 2.495724  | 1.109258  | 0.395397  |                       |             |
| O                          | 1.410944  | 1.638712  | 0.301550  |                       |             |
| O                          | 3.299228  | 1.300943  | 1.440472  |                       |             |
| H                          | 4.081338  | 0.718038  | 1.259605  |                       |             |
| H                          | 1.229642  | -0.048289 | -1.766026 |                       |             |
| H                          | 2.456096  | -1.265368 | -2.140921 |                       |             |
| S                          | 1.244902  | -1.908362 | -0.197162 |                       |             |
| H                          | 0.601126  | -1.024385 | 0.594616  |                       |             |
| C                          | -2.215213 | -0.628032 | -0.530652 |                       |             |
| C                          | -1.526247 | 0.674063  | -0.951720 |                       |             |
| N                          | -3.578447 | -0.835285 | -1.026002 |                       |             |
| H                          | -4.071672 | 0.050106  | -1.111230 |                       |             |
| H                          | -3.583843 | -1.289452 | -1.931095 |                       |             |
| H                          | -1.589622 | -1.453414 | -0.888103 |                       |             |
| C                          | -2.215612 | -0.785679 | 0.999584  |                       |             |
| O                          | -1.289062 | -0.454589 | 1.708114  |                       |             |

| Nov 11, 22 15:56           | dimers_structures.xyz |           | Page 17/325 |
|----------------------------|-----------------------|-----------|-------------|
| O -3.320055                | -1.348877             | 1.483267  |             |
| H -3.900333                | -1.470884             | 0.686901  |             |
| H -0.515127                | 0.723289              | -0.557076 |             |
| H -1.485718                | 0.722919              | -2.040116 |             |
| S -2.415900                | 2.198794              | -0.415654 |             |
| H -2.128016                | 2.076965              | 0.896368  |             |
| 28                         |                       |           |             |
| Dimer 38 of the n...n type |                       |           |             |
| C 1.296643                 | -0.239050             | 0.567975  |             |
| C 2.081852                 | 1.077217              | 0.590852  |             |
| N 1.763596                 | -1.293692             | 1.468062  |             |
| H 2.771400                 | -1.244536             | 1.594611  |             |
| H 1.326175                 | -1.230210             | 2.379127  |             |
| H 0.266765                 | 0.007441              | 0.832996  |             |
| C 1.208528                 | -0.800317             | -0.862007 |             |
| O 1.019821                 | -0.102817             | -1.836170 |             |
| O 1.346252                 | -2.118305             | -0.940035 |             |
| H 1.470906                 | -2.407784             | 0.000327  |             |
| H 1.623151                 | 1.798951              | -0.081928 |             |
| H 2.069310                 | 1.484957              | 1.601753  |             |
| S 3.864062                 | 0.894793              | 0.149839  |             |
| H 3.663355                 | 0.596521              | -1.150287 |             |
| C -2.933915                | -0.039884             | 0.496528  |             |
| C -2.980427                | 1.283055              | -0.276720 |             |
| N -2.423627                | 0.026105              | 1.869811  |             |
| H -1.755267                | 0.785016              | 1.976534  |             |
| H -3.168280                | 0.168684              | 2.541088  |             |
| H -3.955667                | -0.433584             | 0.531423  |             |
| C -2.141079                | -1.108749             | -0.279216 |             |
| O -2.174042                | -1.228043             | -1.481639 |             |
| O -1.419719                | -1.914448             | 0.503812  |             |
| H -1.565392                | -1.560910             | 1.419313  |             |
| H -3.376379                | 1.116064              | -1.277095 |             |
| H -3.630544                | 1.983811              | 0.247081  |             |
| S -1.346971                | 2.132192              | -0.408549 |             |
| H -0.763339                | 1.249118              | -1.246603 |             |
| 28                         |                       |           |             |
| Dimer 39 of the n...n type |                       |           |             |
| C 1.222008                 | 0.509841              | -0.138206 |             |
| C 1.852202                 | -0.479960             | -1.118908 |             |
| N 1.511988                 | 1.928758              | -0.343602 |             |
| H 2.439605                 | 2.064282              | -0.736277 |             |
| H 0.830738                 | 2.359599              | -0.957478 |             |
| H 0.139987                 | 0.391260              | -0.224623 |             |
| C 1.531316                 | 0.141419              | 1.321509  |             |
| O 1.619372                 | -0.997915             | 1.724084  |             |
| O 1.649854                 | 1.198401              | 2.122525  |             |
| H 1.590433                 | 1.976148              | 1.507070  |             |
| H 1.504101                 | -1.486788             | -0.897404 |             |
| H 1.550226                 | -0.219238             | -2.133631 |             |
| S 3.696789                 | -0.452550             | -1.125806 |             |
| H 3.852321                 | -0.970755             | 0.109694  |             |
| C -2.610954                | -0.547453             | 0.681947  |             |
| C -3.315354                | 0.583364              | -0.076254 |             |
| N -1.676986                | -0.136967             | 1.733173  |             |
| H -1.296672                | 0.787301              | 1.552306  |             |
| H -2.124587                | -0.110310             | 2.640907  |             |
| H -3.392093                | -1.163806             | 1.141119  |             |
| C -1.901747                | -1.507688             | -0.291729 |             |
| O -2.338061                | -1.789771             | -1.384923 |             |
| O -0.767399                | -2.028627             | 0.175801  |             |
| H -0.602291                | -1.595247             | 1.047923  |             |
| H -4.039036                | 0.172639              | -0.777932 |             |
| H -3.837767                | 1.222775              | 0.635259  |             |
| S -2.171094                | 1.700440              | -1.001884 |             |
| H -1.846055                | 0.809503              | -1.960945 |             |
| 28                         |                       |           |             |
| Dimer 40 of the n...n type |                       |           |             |
| C -3.099750                | -0.507833             | 0.619164  |             |

| Nov 11, 22 15:56           | dimers_structures.xyz |           | Page 18/325 |
|----------------------------|-----------------------|-----------|-------------|
| C -1.773134                | -1.251792             | 0.810424  |             |
| N -4.059322                | -1.098809             | -0.315862 |             |
| H -3.579162                | -1.585815             | -1.068662 |             |
| H -4.676788                | -1.756180             | 0.144394  |             |
| H -3.577695                | -0.444356             | 1.603096  |             |
| C -2.856619                | 0.959899              | 0.224455  |             |
| O -1.962811                | 1.637180              | 0.683739  |             |
| O -3.742297                | 1.437192              | -0.645723 |             |
| H -4.320699                | 0.658526              | -0.858238 |             |
| H -1.141622                | -0.696585             | 1.502070  |             |
| H -1.968503                | -2.241714             | 1.222659  |             |
| S -0.837810                | -1.556940             | -0.749736 |             |
| H -0.537205                | -0.271310             | -1.018970 |             |
| C 2.423612                 | 0.867542              | 0.836832  |             |
| C 3.662985                 | -0.015946             | 0.643454  |             |
| N 1.300006                 | 0.275184              | 1.559537  |             |
| H 1.166495                 | -0.689580             | 1.264437  |             |
| H 1.465345                 | 0.276102              | 2.559116  |             |
| H 2.745412                 | 1.755760              | 1.394136  |             |
| C 1.921569                 | 1.429797              | -0.502076 |             |
| O 2.634093                 | 1.615295              | -1.462547 |             |
| O 0.623359                 | 1.741346              | -0.523202 |             |
| H 0.231301                 | 1.462689              | 0.336594  |             |
| H 4.444283                 | 0.539952              | 0.127016  |             |
| H 4.037837                 | -0.323337             | 1.620095  |             |
| S 3.332651                 | -1.583882             | -0.269030 |             |
| H 3.018036                 | -1.003730             | -1.444863 |             |
| 28                         |                       |           |             |
| Dimer 41 of the n...n type |                       |           |             |
| C -3.099513                | 0.508501              | -0.618977 |             |
| C -1.772541                | 1.251828              | -0.810368 |             |
| N -4.058598                | 1.099723              | 0.316375  |             |
| H -3.577970                | 1.585768              | 1.069507  |             |
| H -4.675322                | 1.758070              | -0.143481 |             |
| H -3.577739                | 0.445491              | -1.602804 |             |
| C -2.857063                | -0.959460             | -0.224694 |             |
| O -1.963431                | -1.636975             | -0.683911 |             |
| O -3.743223                | -1.436703             | 0.645100  |             |
| H -4.321313                | -0.657905             | 0.857795  |             |
| H -1.141519                | 0.696428              | -1.502326 |             |
| H -1.967504                | 2.241919              | -1.222395 |             |
| S -0.836668                | 1.556047              | 0.749582  |             |
| H -0.537769                | 0.270029              | 1.018827  |             |
| C 2.423966                 | -0.868072             | -0.836325 |             |
| C 3.662998                 | 0.015769              | -0.642855 |             |
| N 1.300484                 | -0.276408             | -1.559908 |             |
| H 1.166689                 | 0.688524              | -1.265458 |             |
| H 1.466276                 | -0.277912             | -2.559416 |             |
| H 2.746154                 | -1.756549             | -1.392989 |             |
| C 1.921328                 | -1.429804             | 0.502620  |             |
| O 2.633271                 | -1.614538             | 1.463631  |             |
| O 0.623178                 | -1.741866             | 0.522956  |             |
| H 0.231742                 | -1.463189             | -0.337163 |             |
| H 4.444099                 | -0.539560             | -0.125512 |             |
| H 4.038455                 | 0.322568              | -1.619449 |             |
| S 3.331831                 | 1.584340              | 0.268331  |             |
| H 3.016500                 | 1.004993              | 1.444361  |             |
| 28                         |                       |           |             |
| Dimer 42 of the n...n type |                       |           |             |
| C -1.751732                | -0.064256             | 0.814441  |             |
| C -1.842751                | -1.349135             | -0.016275 |             |
| N -2.777526                | 0.123259              | 1.842083  |             |
| H -3.673311                | -0.247328             | 1.534186  |             |
| H -2.525709                | -0.336663             | 2.708577  |             |
| H -0.775550                | -0.049978             | 1.308928  |             |
| C -1.713836                | 1.182764              | -0.082934 |             |
| O -1.176948                | 1.212815              | -1.168961 |             |
| O -2.299276                | 2.250420              | 0.454956  |             |
| H -2.691112                | 1.916243              | 1.301975  |             |

| Nov 11, 22 15:56           | dimers_structures.xyz |           | Page 19/325 |
|----------------------------|-----------------------|-----------|-------------|
| H                          | -1.012413             | -1.412119 | -0.716898   |
| H                          | -1.800421             | -2.211455 | 0.649204    |
| S                          | -3.419997             | -1.520389 | -0.956911   |
| H                          | -3.177925             | -0.513485 | -1.821057   |
| C                          | 1.751813              | -0.064290 | -0.814586   |
| C                          | 1.842586              | -1.349226 | 0.015987    |
| N                          | 2.777936              | 0.123271  | -1.841926   |
| H                          | 3.673476              | -0.247929 | -1.534076   |
| H                          | 2.526033              | -0.335932 | -2.708769   |
| H                          | 0.775791              | -0.049900 | -1.309395   |
| C                          | 1.713919              | 1.182704  | 0.082907    |
| O                          | 1.176626              | 1.212798  | 1.168742    |
| O                          | 2.299922              | 2.250148  | -0.454684   |
| H                          | 2.691955              | 1.915805  | -1.301627   |
| H                          | 1.012087              | -1.412341 | 0.716405    |
| H                          | 1.800457              | -2.211508 | -0.649554   |
| S                          | 3.419611              | -1.520620 | 0.957045    |
| H                          | 3.177366              | -0.513770 | 1.821206    |
| 28                         |                       |           |             |
| Dimer 43 of the n...n type |                       |           |             |
| C                          | -1.364356             | 0.287470  | 0.023859    |
| C                          | -2.394386             | 0.660984  | 1.092251    |
| N                          | -1.337406             | 1.109545  | -1.184676   |
| H                          | -2.264058             | 1.457244  | -1.413881   |
| H                          | -0.697221             | 1.888144  | -1.085272   |
| H                          | -0.376196             | 0.347251  | 0.493049    |
| C                          | -1.479950             | -1.189429 | -0.387707   |
| O                          | -1.804408             | -2.081262 | 0.363037    |
| O                          | -1.128599             | -1.406534 | -1.656557   |
| H                          | -0.994906             | -0.490663 | -2.024329   |
| H                          | -2.287240             | 0.010816  | 1.959281    |
| H                          | -2.231927             | 1.692941  | 1.403639    |
| S                          | -4.141143             | 0.590639  | 0.500994    |
| H                          | -4.187522             | -0.748882 | 0.350964    |
| C                          | 3.054282              | 0.645436  | 0.363605    |
| C                          | 3.296191              | -0.858586 | 0.202288    |
| N                          | 2.604160              | 1.095751  | 1.684184    |
| H                          | 1.994238              | 0.406803  | 2.117803    |
| H                          | 3.383728              | 1.262272  | 2.309106    |
| H                          | 3.997341              | 1.157038  | 0.139552    |
| C                          | 2.070715              | 1.174463  | -0.694019   |
| O                          | 1.985964              | 0.744602  | -1.819835   |
| O                          | 1.313955              | 2.187082  | -0.254279   |
| H                          | 1.549005              | 2.273715  | 0.706337    |
| H                          | 3.698801              | -1.073923 | -0.786129   |
| H                          | 4.015330              | -1.187096 | 0.952465    |
| S                          | 1.783580              | -1.883440 | 0.464819    |
| H                          | 1.224082              | -1.621034 | -0.732736   |
| 28                         |                       |           |             |
| Dimer 44 of the n...n type |                       |           |             |
| C                          | 1.921135              | 0.659711  | 0.539234    |
| C                          | 1.341987              | -0.665784 | 1.048228    |
| N                          | 1.261399              | 1.267699  | -0.617234   |
| H                          | 0.910707              | 0.558368  | -1.255339   |
| H                          | 0.475187              | 1.849491  | -0.354382   |
| H                          | 1.873741              | 1.372087  | 1.370963    |
| C                          | 3.424410              | 0.523999  | 0.231682    |
| O                          | 4.184077              | -0.164159 | 0.876354    |
| O                          | 3.824431              | 1.259558  | -0.805257   |
| H                          | 2.985221              | 1.663409  | -1.151870   |
| H                          | 1.901531              | -1.006585 | 1.918084    |
| H                          | 0.302970              | -0.518836 | 1.339221    |
| S                          | 1.317331              | -2.014373 | -0.210358   |
| H                          | 2.651996              | -2.204305 | -0.251573   |
| C                          | -2.954856             | -0.347972 | -0.589807   |
| C                          | -3.477190             | 0.329705  | 0.681032    |
| N                          | -2.400987             | -1.695756 | -0.440852   |
| H                          | -1.876207             | -1.780048 | 0.426296    |
| H                          | -3.129272             | -2.399774 | -0.434467   |

| Nov 11, 22 15:56           | dimers_structures.xyz |           | Page 20/325 |
|----------------------------|-----------------------|-----------|-------------|
| H                          | -3.794652             | -0.412414 | -1.291874   |
| C                          | -1.919822             | 0.523940  | -1.318749   |
| O                          | -1.885520             | 1.732629  | -1.267728   |
| O                          | -1.046547             | -0.180439 | -2.042445   |
| H                          | -1.220363             | -1.126177 | -1.806135   |
| H                          | -3.925179             | 1.292041  | 0.437840    |
| H                          | -4.237273             | -0.304666 | 1.137026    |
| S                          | -2.193785             | 0.584024  | 1.981738    |
| H                          | -1.543532             | 1.577082  | 1.343626    |
| 28                         |                       |           |             |
| Dimer 45 of the n...n type |                       |           |             |
| C                          | -2.361664             | -1.125995 | 0.505985    |
| C                          | -3.240706             | -0.484633 | -0.574661   |
| N                          | -2.285592             | -0.462464 | 1.807828    |
| H                          | -2.182895             | 0.542415  | 1.686307    |
| H                          | -3.116036             | -0.635153 | 2.361619    |
| H                          | -2.758009             | -2.134844 | 0.676212    |
| C                          | -0.929383             | -1.381544 | 0.012282    |
| O                          | -0.625157             | -1.547128 | -1.147232   |
| O                          | -0.033289             | -1.455421 | 1.000216    |
| H                          | -0.534905             | -1.182369 | 1.808461    |
| H                          | -3.154019             | -1.057865 | -1.497162   |
| H                          | -4.280929             | -0.507112 | -0.248046   |
| S                          | -2.887728             | 1.289887  | -0.918196   |
| H                          | -1.580944             | 1.156483  | -1.230926   |
| C                          | 2.361938              | 1.126040  | 0.505479    |
| C                          | 3.240506              | 0.484045  | -0.575190   |
| N                          | 2.285863              | 0.462886  | 1.807546    |
| H                          | 2.183619              | -0.542077 | 1.686432    |
| H                          | 3.115994              | 0.636256  | 2.361577    |
| H                          | 2.758695              | 2.134758  | 0.675410    |
| C                          | 0.929599              | 1.381914  | 0.011959    |
| O                          | 0.625249              | 1.547604  | -1.147518   |
| O                          | 0.033736              | 1.456042  | 1.000067    |
| H                          | 0.535551              | 1.182735  | 1.808177    |
| H                          | 3.153600              | 1.056927  | -1.497890   |
| H                          | 4.280866              | 0.506486  | -0.249004   |
| S                          | 2.887173              | -1.290529 | -0.917911   |
| H                          | 1.580354              | -1.157070 | -1.230475   |
| 28                         |                       |           |             |
| Dimer 46 of the n...n type |                       |           |             |
| C                          | -1.589855             | 0.133377  | 0.321583    |
| C                          | -2.542470             | -0.833347 | 1.029295    |
| N                          | -1.691426             | 1.545759  | 0.692680    |
| H                          | -2.648398             | 1.794247  | 0.929252    |
| H                          | -1.095811             | 1.776381  | 1.477992    |
| H                          | -0.573819             | -0.213394 | 0.532062    |
| C                          | -1.698584             | 0.015407  | -1.207228   |
| O                          | -1.935013             | -1.017352 | -1.791927   |
| O                          | -1.460179             | 1.163882  | -1.844985   |
| H                          | -1.375094             | 1.832542  | -1.115361   |
| H                          | -2.342814             | -1.854931 | 0.709669    |
| H                          | -2.389649             | -0.765749 | 2.106542    |
| S                          | -4.329464             | -0.457895 | 0.757689    |
| H                          | -4.344293             | -0.777250 | -0.552582   |
| C                          | 3.004364              | -0.302262 | 0.907131    |
| C                          | 2.092551              | 0.911105  | 1.126175    |
| N                          | 4.335477              | -0.028363 | 0.363010    |
| H                          | 4.304077              | 0.742907  | -0.299491   |
| H                          | 4.996865              | 0.208278  | 1.092616    |
| H                          | 3.131117              | -0.793626 | 1.878546    |
| C                          | 2.319997              | -1.364797 | 0.028397    |
| O                          | 1.130494              | -1.593967 | 0.056639    |
| O                          | 3.159605              | -2.035973 | -0.755663   |
| H                          | 4.038188              | -1.600045 | -0.609580   |
| H                          | 1.161629              | 0.598139  | 1.597530    |
| H                          | 2.589797              | 1.618585  | 1.789782    |
| S                          | 1.725003              | 1.860138  | -0.409913   |
| H                          | 1.035963              | 0.886639  | -1.035838   |

| Nov 11, 22 15:56           | dimers_structures.xyz | Page 21/325         |
|----------------------------|-----------------------|---------------------|
| 28                         |                       |                     |
| Dimer 47 of the n...n type |                       |                     |
| C                          | 2.909954              | 0.040607 -0.442694  |
| C                          | 2.538842              | -1.445853 -0.511003 |
| N                          | 3.357262              | 0.546834 0.856763   |
| H                          | 2.854886              | 0.087272 1.612716   |
| H                          | 4.348953              | 0.396497 0.997217   |
| H                          | 3.716598              | 0.208537 -1.165552  |
| C                          | 1.759606              | 0.930100 -0.945052  |
| O                          | 1.003866              | 0.615054 -1.837237  |
| O                          | 1.681242              | 2.105778 -0.320678  |
| H                          | 2.374379              | 2.052234 0.387945   |
| H                          | 2.231359              | -1.706767 -1.522729 |
| H                          | 3.408226              | -2.045893 -0.241983 |
| S                          | 1.210707              | -1.937517 0.669730  |
| H                          | 0.219713              | -1.258477 0.060379  |
| C                          | -2.433192             | 1.049298 0.271750   |
| C                          | -3.293471             | -0.040648 -0.379287 |
| N                          | -1.599219             | 1.853767 -0.615208  |
| H                          | -1.098333             | 1.283925 -1.293915  |
| H                          | -2.140874             | 2.550934 -1.110944  |
| H                          | -3.119788             | 1.732404 0.786765   |
| C                          | -1.549710             | 0.483484 1.396026   |
| O                          | -1.862747             | -0.457386 2.090878  |
| O                          | -0.400102             | 1.138861 1.561247   |
| H                          | -0.365415             | 1.807109 0.831986   |
| H                          | -3.956712             | -0.493285 0.356469  |
| H                          | -3.900497             | 0.410975 -1.163994  |
| S                          | -2.324108             | -1.380968 -1.197876 |
| H                          | -2.034625             | -2.054297 -0.067040 |
| 28                         |                       |                     |
| Dimer 48 of the n...n type |                       |                     |
| C                          | 1.286127              | 0.192039 -0.018790  |
| C                          | 2.312354              | 0.937881 -0.876724  |
| N                          | 1.023640              | 0.738203 1.312231   |
| H                          | 1.891421              | 1.022463 1.760930   |
| H                          | 0.424004              | 1.554296 1.243401   |
| H                          | 0.338119              | 0.205227 -0.567055  |
| C                          | 1.622284              | -1.300687 0.100631  |
| O                          | 2.186658              | -1.935383 -0.758840 |
| O                          | 1.195220              | -1.864071 1.237172  |
| H                          | 0.841136              | -1.122217 1.781645  |
| H                          | 2.378431              | 0.484842 -1.864846  |
| H                          | 1.997021              | 1.975809 -0.986753  |
| S                          | 3.998180              | 1.004297 -0.130544  |
| H                          | 4.272018              | -0.307213 -0.283982 |
| C                          | -2.831597             | -0.448243 0.451464  |
| C                          | -3.266321             | 1.008590 0.255345   |
| N                          | -1.947616             | -0.726550 1.584718  |
| H                          | -1.292682             | 0.034516 1.744068   |
| H                          | -2.471328             | -0.874196 2.438863  |
| H                          | -3.743673             | -1.040828 0.586606  |
| C                          | -2.194660             | -1.018456 -0.827797 |
| O                          | -2.525798             | -0.697376 -1.946012 |
| O                          | -1.241220             | -1.923403 -0.596397 |
| H                          | -1.148720             | -1.953144 0.389035  |
| H                          | -3.994304             | 1.078183 -0.551394  |
| H                          | -3.725550             | 1.372649 1.174322   |
| S                          | -1.882171             | 2.176224 -0.105631  |
| H                          | -1.642186             | 1.734830 -1.356840  |
| 28                         |                       |                     |
| Dimer 49 of the n...n type |                       |                     |
| C                          | -3.001218             | 0.538587 0.265779   |
| C                          | -3.456784             | -0.833681 -0.241363 |
| N                          | -2.635595             | 1.528218 -0.750923  |
| H                          | -2.179110             | 1.087109 -1.545480  |
| H                          | -3.446412             | 2.028193 -1.095145  |
| H                          | -3.823278             | 0.957906 0.857296   |
| C                          | -1.836979             | 0.417536 1.263116   |

| Nov 11, 22 15:56           | dimers_structures.xyz | Page 22/325         |
|----------------------------|-----------------------|---------------------|
| O                          | -1.670184             | -0.528301 2.001331  |
| O                          | -1.015331             | 1.467269 1.254770   |
| H                          | -1.340166             | 2.034392 0.509166   |
| H                          | -3.775910             | -1.457248 0.592288  |
| H                          | -4.297743             | -0.702164 -0.922216 |
| S                          | -2.168830             | -1.742255 -1.202356 |
| H                          | -1.418817             | -2.084953 -0.136713 |
| C                          | 1.739336              | -0.705190 0.119920  |
| C                          | 1.099915              | 0.182447 -0.953542  |
| N                          | 1.448876              | -0.359419 1.513799  |
| H                          | 1.314524              | 0.644174 1.608043   |
| H                          | 0.592834              | -0.796551 1.836587  |
| H                          | 1.392640              | -1.729871 -0.056784 |
| C                          | 3.266490              | -0.778627 -0.062831 |
| O                          | 3.815097              | -0.804512 -1.142216 |
| O                          | 3.935116              | -0.835097 1.087851  |
| H                          | 3.225938              | -0.742889 1.779925  |
| H                          | 1.351343              | -0.188537 -1.945725 |
| H                          | 0.018682              | 0.156411 -0.846521  |
| S                          | 1.573140              | 1.960349 -0.839243  |
| H                          | 2.841391              | 1.801622 -1.269634  |
| 28                         |                       |                     |
| Dimer 50 of the n...n type |                       |                     |
| C                          | -3.112534             | 0.623264 -0.227493  |
| C                          | -3.321404             | -0.879207 -0.012441 |
| N                          | -2.894628             | 1.057886 -1.610088  |
| H                          | -2.341214             | 0.374026 -2.120904  |
| H                          | -3.769715             | 1.187236 -2.103473  |
| H                          | -4.004378             | 1.138397 0.147627   |
| C                          | -1.962519             | 1.163140 0.639977   |
| O                          | -1.680042             | 0.737274 1.735506   |
| O                          | -1.300564             | 2.176102 0.070617   |
| H                          | -1.698568             | 2.254662 -0.834836  |
| H                          | -3.560731             | -1.083703 1.029910  |
| H                          | -4.150684             | -1.216263 -0.634096 |
| S                          | -1.861743             | -1.902721 -0.494915 |
| H                          | -1.157515             | -1.665075 0.627549  |
| C                          | 1.443594              | 0.366552 -0.140958  |
| C                          | 2.560933              | 0.483773 -1.181103  |
| N                          | 1.437145              | 1.352917 0.936229   |
| H                          | 2.381199              | 1.631731 1.185848   |
| H                          | 0.890542              | 2.168259 0.689992   |
| H                          | 0.491258              | 0.452479 -0.676895  |
| C                          | 1.388219              | -1.039086 0.477063  |
| O                          | 1.706515              | -2.052542 -0.103361 |
| O                          | 0.887956              | -1.050216 1.714044  |
| H                          | 0.768829              | -0.090797 1.942443  |
| H                          | 2.434983              | -0.272127 -1.954942 |
| H                          | 2.520755              | 1.470556 -1.642517  |
| S                          | 4.258627              | 0.336774 -0.471822  |
| H                          | 4.158828              | -0.965403 -0.135634 |
| 28                         |                       |                     |
| Dimer 51 of the n...n type |                       |                     |
| C                          | -2.290704             | 0.139181 -1.098366  |
| C                          | -2.718082             | -1.243921 -0.592759 |
| N                          | -0.923766             | 0.248766 -1.609741  |
| H                          | -0.291859             | -0.389807 -1.130143 |
| H                          | -0.875022             | 0.041071 -2.599654  |
| H                          | -2.980103             | 0.416709 -1.903861  |
| C                          | -2.505460             | 1.216296 -0.019217  |
| O                          | -3.444256             | 1.221752 0.745524   |
| O                          | -1.567962             | 2.163005 -0.013336  |
| H                          | -0.916945             | 1.876064 -0.706438  |
| H                          | -3.777223             | -1.243095 -0.340226 |
| H                          | -2.544702             | -1.980904 -1.376913 |
| S                          | -1.768565             | -1.840844 0.874425  |
| H                          | -2.336834             | -0.999031 1.761576  |
| C                          | 2.378103              | 0.227678 1.062806   |
| C                          | 2.907712              | -1.093596 0.494594  |

| Nov 11, 22 15:56           |           |           |           | dimers_structures.xyz | Page 23/325 |
|----------------------------|-----------|-----------|-----------|-----------------------|-------------|
| N                          | 1.079820  | 0.177361  | 1.736475  |                       |             |
| H                          | 0.447149  | -0.485400 | 1.290915  |                       |             |
| H                          | 1.173088  | -0.089565 | 2.709054  |                       |             |
| H                          | 3.118017  | 0.587591  | 1.787288  |                       |             |
| C                          | 2.333431  | 1.328440  | -0.011979 |                       |             |
| O                          | 3.133080  | 1.421338  | -0.915524 |                       |             |
| O                          | 1.339289  | 2.200978  | 0.159989  |                       |             |
| H                          | 0.824872  | 1.845022  | 0.930597  |                       |             |
| H                          | 3.922212  | -0.965575 | 0.120426  |                       |             |
| H                          | 2.918490  | -1.843215 | 1.285782  |                       |             |
| S                          | 1.871618  | -1.804225 | -0.857643 |                       |             |
| H                          | 2.266419  | -0.932700 | -1.807742 |                       |             |
| 28                         |           |           |           |                       |             |
| Dimer 52 of the n...n type |           |           |           |                       |             |
| C                          | 2.904685  | -0.258336 | 0.369853  |                       |             |
| C                          | 2.723438  | -1.227701 | -0.804175 |                       |             |
| N                          | 2.376984  | -0.692706 | 1.666994  |                       |             |
| H                          | 1.565509  | -1.295876 | 1.550895  |                       |             |
| H                          | 3.070608  | -1.196800 | 2.205606  |                       |             |
| H                          | 3.979947  | -0.081028 | 0.482201  |                       |             |
| C                          | 2.327560  | 1.131655  | 0.036281  |                       |             |
| O                          | 2.403348  | 1.647546  | -1.053502 |                       |             |
| O                          | 1.754436  | 1.734776  | 1.082077  |                       |             |
| H                          | 1.842556  | 1.076284  | 1.820204  |                       |             |
| H                          | 3.127532  | -0.786376 | -1.713972 |                       |             |
| H                          | 3.257758  | -2.154431 | -0.594028 |                       |             |
| S                          | 0.972624  | -1.730954 | -1.091128 |                       |             |
| H                          | 0.499481  | -0.506262 | -1.409029 |                       |             |
| C                          | -2.255897 | 0.235337  | 1.071226  |                       |             |
| C                          | -2.322038 | 1.582190  | 0.340815  |                       |             |
| N                          | -0.934650 | -0.145440 | 1.576373  |                       |             |
| H                          | -0.212011 | 0.244851  | 0.980525  |                       |             |
| H                          | -0.781529 | 0.196925  | 2.517148  |                       |             |
| H                          | -2.949325 | 0.285221  | 1.917678  |                       |             |
| C                          | -2.804903 | -0.897567 | 0.185011  |                       |             |
| O                          | -3.775880 | -0.773303 | -0.527577 |                       |             |
| O                          | -2.129499 | -2.041161 | 0.282435  |                       |             |
| H                          | -1.365138 | -1.836648 | 0.878625  |                       |             |
| H                          | -3.346607 | 1.804504  | 0.047462  |                       |             |
| H                          | -1.965175 | 2.369410  | 1.004941  |                       |             |
| S                          | -1.240424 | 1.666276  | -1.154821 |                       |             |
| H                          | -1.991455 | 0.845765  | -1.918172 |                       |             |
| 28                         |           |           |           |                       |             |
| Dimer 53 of the n...n type |           |           |           |                       |             |
| C                          | -1.645120 | 0.178342  | 0.606846  |                       |             |
| C                          | -2.090339 | -1.259033 | 0.321699  |                       |             |
| N                          | -2.327921 | 0.872158  | 1.701355  |                       |             |
| H                          | -3.293351 | 0.562864  | 1.782231  |                       |             |
| H                          | -1.868258 | 0.712605  | 2.589441  |                       |             |
| H                          | -0.578411 | 0.126580  | 0.837440  |                       |             |
| C                          | -1.724233 | 1.043690  | -0.660064 |                       |             |
| O                          | -1.421234 | 0.642099  | -1.762920 |                       |             |
| O                          | -2.123730 | 2.293790  | -0.437332 |                       |             |
| H                          | -2.315788 | 2.318175  | 0.536193  |                       |             |
| H                          | -1.476499 | -1.684337 | -0.468158 |                       |             |
| H                          | -1.960105 | -1.859180 | 1.222128  |                       |             |
| S                          | -3.874410 | -1.413631 | -0.126946 |                       |             |
| H                          | -3.778370 | -0.795654 | -1.321978 |                       |             |
| C                          | 3.041579  | -0.380963 | 0.734279  |                       |             |
| C                          | 2.246955  | 0.892568  | 1.044548  |                       |             |
| N                          | 4.296365  | -0.205280 | 0.000095  |                       |             |
| H                          | 4.224518  | 0.562827  | -0.662787 |                       |             |
| H                          | 5.071239  | -0.012996 | 0.623293  |                       |             |
| H                          | 3.274690  | -0.860606 | 1.691646  |                       |             |
| C                          | 2.172960  | -1.413519 | -0.007729 |                       |             |
| O                          | 0.991025  | -1.570993 | 0.205319  |                       |             |
| O                          | 2.845461  | -2.143195 | -0.894945 |                       |             |
| S                          | 3.759863  | -1.759013 | -0.888582 |                       |             |
| H                          | 1.373021  | 0.650757  | 1.648098  |                       |             |

| Nov 11, 22 15:56           |           |           |           | dimers_structures.xyz | Page 24/325 |
|----------------------------|-----------|-----------|-----------|-----------------------|-------------|
| H                          | 2.875875  | 1.578463  | 1.612251  |                       |             |
| S                          | 1.726125  | 1.836894  | -0.450879 |                       |             |
| H                          | 0.942033  | 0.879048  | -0.984615 |                       |             |
| 28                         |           |           |           |                       |             |
| Dimer 54 of the n...n type |           |           |           |                       |             |
| C                          | 2.783799  | 0.480028  | 0.387381  |                       |             |
| C                          | 3.154035  | -0.446680 | -0.778140 |                       |             |
| N                          | 2.541913  | -0.118608 | 1.697701  |                       |             |
| H                          | 1.914582  | -0.914418 | 1.617725  |                       |             |
| H                          | 3.405946  | -0.426215 | 2.127948  |                       |             |
| H                          | 3.626273  | 1.174760  | 0.501580  |                       |             |
| C                          | 1.611435  | 1.412504  | 0.044447  |                       |             |
| O                          | 1.310147  | 1.740460  | -1.080440 |                       |             |
| O                          | 0.990788  | 1.906427  | 1.119051  |                       |             |
| H                          | 1.333965  | 1.374995  | 1.876687  |                       |             |
| H                          | 3.265507  | 0.145314  | -1.686070 |                       |             |
| H                          | 4.106673  | -0.930747 | -0.559716 |                       |             |
| S                          | 1.985227  | -1.833894 | -1.096852 |                       |             |
| H                          | 0.871995  | -1.083135 | -1.184447 |                       |             |
| C                          | -2.177895 | -0.878847 | -0.553355 |                       |             |
| C                          | -1.814014 | 0.446546  | -1.233187 |                       |             |
| N                          | -3.606394 | -1.123684 | -0.336883 |                       |             |
| H                          | -4.089613 | -0.257889 | -0.109702 |                       |             |
| H                          | -4.045893 | -1.524539 | -1.156684 |                       |             |
| H                          | -1.790948 | -1.689474 | -1.182307 |                       |             |
| C                          | -1.442729 | -1.049669 | 0.785610  |                       |             |
| O                          | -0.313080 | -0.663157 | 0.981710  |                       |             |
| O                          | -2.148600 | -1.695854 | 1.712329  |                       |             |
| H                          | -3.033633 | -1.843905 | 1.290933  |                       |             |
| H                          | -0.744650 | 0.511618  | -1.422944 |                       |             |
| H                          | -2.341792 | 0.510449  | -2.184854 |                       |             |
| S                          | -2.307914 | 1.938073  | -0.266916 |                       |             |
| H                          | -1.265874 | 1.896074  | 0.588701  |                       |             |
| 28                         |           |           |           |                       |             |
| Dimer 55 of the n...n type |           |           |           |                       |             |
| C                          | 2.917466  | 0.881493  | -0.473552 |                       |             |
| C                          | 3.483211  | -0.529570 | -0.264515 |                       |             |
| N                          | 2.984799  | 1.795047  | 0.669655  |                       |             |
| H                          | 2.908488  | 1.280818  | 1.544229  |                       |             |
| H                          | 3.853519  | 2.315242  | 0.683877  |                       |             |
| H                          | 3.475645  | 1.331970  | -1.302134 |                       |             |
| C                          | 1.468008  | 0.833741  | -0.989513 |                       |             |
| O                          | 1.064069  | 0.016552  | -1.786512 |                       |             |
| O                          | 0.695460  | 1.809995  | -0.514304 |                       |             |
| H                          | 1.274810  | 2.287917  | 0.134261  |                       |             |
| H                          | 3.313633  | -1.126602 | -1.159500 |                       |             |
| H                          | 4.556272  | -0.464782 | -0.083064 |                       |             |
| S                          | 2.799094  | -1.412725 | 1.202679  |                       |             |
| H                          | 1.501928  | -1.412266 | 0.820586  |                       |             |
| C                          | -2.029744 | 0.116817  | -0.804493 |                       |             |
| C                          | -2.439208 | 1.173152  | 0.223835  |                       |             |
| N                          | -3.092218 | -0.446722 | -1.640842 |                       |             |
| H                          | -3.947636 | -0.571521 | -1.104746 |                       |             |
| H                          | -3.300325 | 0.154326  | -2.429155 |                       |             |
| H                          | -1.289626 | 0.576301  | -1.465542 |                       |             |
| C                          | -1.253796 | -1.033983 | -0.152391 |                       |             |
| O                          | -0.555601 | -0.906717 | 0.830407  |                       |             |
| O                          | -1.387243 | -2.199758 | -0.783059 |                       |             |
| H                          | -2.061970 | -2.025417 | -1.486228 |                       |             |
| H                          | -1.554212 | 1.551732  | 0.730696  |                       |             |
| H                          | -2.932894 | 2.000350  | -0.286795 |                       |             |
| S                          | -3.652475 | 0.570081  | 1.477694  |                       |             |
| H                          | -2.800680 | -0.264508 | 2.107375  |                       |             |
| 28                         |           |           |           |                       |             |
| Dimer 56 of the n...n type |           |           |           |                       |             |
| C                          | -2.848339 | -0.500460 | 0.865123  |                       |             |
| C                          | -3.651234 | 0.468947  | -0.011764 |                       |             |
| N                          | -2.051530 | 0.066181  | 1.952125  |                       |             |
| H                          | -1.535367 | 0.884463  | 1.635360  |                       |             |

| Nov 11, 22 15:56           | dimers_structures.xyz |           | Page 25/325 |
|----------------------------|-----------------------|-----------|-------------|
| H                          | -2.629840             | 0.330179  | 2.740594    |
| H                          | -3.570987             | -1.193254 | 1.313435    |
| C                          | -1.940603             | -1.414244 | 0.022839    |
| O                          | -2.189213             | -1.769989 | -1.105212   |
| O                          | -0.851328             | -1.825829 | 0.679306    |
| H                          | -0.874411             | -1.327049 | 1.535906    |
| H                          | -4.161942             | -0.088621 | -0.796240   |
| H                          | -4.398920             | 0.972864  | 0.601398    |
| S                          | -2.658796             | 1.823571  | -0.768554   |
| H                          | -1.766396             | 1.040007  | -1.406205   |
| C                          | 2.098193              | -0.843395 | -0.144104   |
| C                          | 3.213473              | -0.492003 | 0.845137    |
| N                          | 2.510054              | -1.167472 | -1.511944   |
| H                          | 3.312272              | -0.608876 | -1.792464   |
| H                          | 2.756549              | -2.145233 | -1.606191   |
| H                          | 1.558326              | -1.706762 | 0.257066    |
| C                          | 1.028225              | 0.258284  | -0.197198   |
| O                          | 0.687324              | 0.913997  | 0.761713    |
| O                          | 0.472367              | 0.404229  | -1.400110   |
| H                          | 0.972237              | -0.225257 | -1.981393   |
| H                          | 2.795051              | -0.322168 | 1.836135    |
| H                          | 3.921067              | -1.319438 | 0.899071    |
| S                          | 4.210982              | 0.982053  | 0.354958    |
| H                          | 3.226223              | 1.886144  | 0.534016    |
| 28                         |                       |           |             |
| Dimer 57 of the n...n type |                       |           |             |
| C                          | -3.134731             | 0.159019  | -0.569502   |
| C                          | -3.419406             | -0.955682 | 0.441938    |
| N                          | -2.628415             | -0.245366 | -1.882396   |
| H                          | -1.968098             | -1.012945 | -1.801953   |
| H                          | -3.379113             | -0.544326 | -2.493332   |
| H                          | -4.081725             | 0.687101  | -0.735109   |
| C                          | -2.206400             | 1.239998  | 0.005190    |
| O                          | -2.128671             | 1.517153  | 1.178855    |
| O                          | -1.508557             | 1.892902  | -0.931358   |
| H                          | -1.670827             | 1.382379  | -1.763934   |
| H                          | -3.888102             | -0.541988 | 1.333651    |
| H                          | -4.101605             | -1.677905 | -0.006638   |
| S                          | -1.937541             | -1.925185 | 0.961716    |
| H                          | -1.412597             | -0.958890 | 1.741562    |
| C                          | 1.545718              | -0.248678 | 0.435341    |
| C                          | 2.731444              | -1.221478 | 0.480492    |
| N                          | 0.674673              | -0.334227 | -0.732064   |
| H                          | 1.224453              | -0.436196 | -1.581446   |
| H                          | 0.061860              | -1.138440 | -0.650947   |
| H                          | 0.930052              | -0.455487 | 1.319282    |
| C                          | 2.007610              | 1.203044  | 0.635627    |
| O                          | 2.987144              | 1.506286  | 1.280763    |
| O                          | 1.227880              | 2.125515  | 0.072672    |
| H                          | 0.507491              | 1.663175  | -0.412366   |
| H                          | 3.273140              | -1.117330 | 1.419452    |
| H                          | 2.356533              | -2.242231 | 0.401456    |
| S                          | 3.916115              | -1.019654 | -0.919599   |
| H                          | 4.399766              | 0.175469  | -0.524304   |
| 28                         |                       |           |             |
| Dimer 58 of the n...n type |                       |           |             |
| C                          | 1.221681              | 0.034866  | -0.539585   |
| C                          | 1.350166              | -0.853293 | 0.700567    |
| N                          | 1.472290              | -0.596408 | -1.835122   |
| H                          | 2.181178              | -1.321126 | -1.759632   |
| H                          | 0.626345              | -1.009362 | -2.210237   |
| H                          | 0.197622              | 0.415806  | -0.555203   |
| C                          | 2.093136              | 1.296953  | -0.419514   |
| O                          | 2.299258              | 1.876810  | 0.622388    |
| O                          | 2.582489              | 1.718976  | -1.586393   |
| H                          | 2.301354              | 1.022618  | -2.234671   |
| H                          | 1.069417              | -0.291065 | 1.587781    |
| H                          | 0.681147              | -1.707489 | 0.605438    |
| S                          | 3.032286              | -1.572847 | 0.931073    |

| Nov 11, 22 15:56           | dimers_structures.xyz |           | Page 26/325 |
|----------------------------|-----------------------|-----------|-------------|
| H                          | 3.645647              | -0.409214 | 1.228811    |
| C                          | -2.819515             | 0.726652  | 0.296402    |
| C                          | -3.333714             | -0.521547 | -0.425970   |
| N                          | -2.242544             | 1.778817  | -0.545191   |
| H                          | -1.782506             | 1.387604  | -1.362970   |
| H                          | -2.950024             | 2.426768  | -0.870078   |
| H                          | -3.668344             | 1.160686  | 0.837130    |
| C                          | -1.812352             | 0.367223  | 1.403719    |
| O                          | -1.846920             | -0.660172 | 2.041240    |
| O                          | -0.892195             | 1.309110  | 1.618277    |
| H                          | -1.051828             | 1.987258  | 0.915373    |
| H                          | -3.827235             | -1.189274 | 0.278201    |
| H                          | -4.052089             | -0.224465 | -1.189785   |
| S                          | -2.022501             | -1.475963 | -1.310110   |
| H                          | -1.472923             | -2.007561 | -0.201188   |
| 28                         |                       |           |             |
| Dimer 59 of the n...n type |                       |           |             |
| C                          | 2.522749              | -1.265346 | 0.130265    |
| C                          | 3.255247              | -0.175063 | 0.922946    |
| N                          | 2.871112              | -1.396081 | -1.286400   |
| H                          | 3.141674              | -0.496089 | -1.675825   |
| H                          | 3.635093              | -2.045436 | -1.427743   |
| H                          | 2.733054              | -2.220958 | 0.623487    |
| C                          | 0.996881              | -1.108117 | 0.253646    |
| O                          | 0.439700              | -0.771161 | 1.275311    |
| O                          | 0.332879              | -1.407784 | -0.859787   |
| H                          | 1.045015              | -1.603702 | -1.524123   |
| H                          | 2.880361              | -0.151868 | 1.945197    |
| H                          | 4.322174              | -0.397530 | 0.943654    |
| S                          | 3.123429              | 1.509608  | 0.183250    |
| H                          | 1.777813              | 1.602665  | 0.226632    |
| C                          | -2.563242             | 0.916828  | -0.704100   |
| C                          | -3.495741             | 0.181470  | 0.268614    |
| N                          | -2.106161             | 0.187171  | -1.886362   |
| H                          | -1.882482             | -0.776619 | -1.650884   |
| H                          | -2.807947             | 0.186378  | -2.616652   |
| H                          | -3.108259             | 1.802293  | -1.052380   |
| C                          | -1.341846             | 1.515806  | 0.018072    |
| O                          | -1.372300             | 1.967013  | 1.138934    |
| O                          | -0.244574             | 1.560547  | -0.741366   |
| H                          | -0.490433             | 1.075547  | -1.569776   |
| H                          | -3.675815             | 0.811945  | 1.138667    |
| H                          | -4.448724             | -0.014548 | -0.223697   |
| S                          | -2.892770             | -1.472483 | 0.818098    |
| H                          | -1.656649             | -1.086102 | 1.209827    |
| 28                         |                       |           |             |
| Dimer 60 of the n...n type |                       |           |             |
| C                          | 2.810986              | 0.234531  | 0.465050    |
| C                          | 3.076782              | -0.776451 | -0.658048   |
| N                          | 2.372868              | -0.296388 | 1.752530    |
| H                          | 1.627213              | -0.976492 | 1.631794    |
| H                          | 3.138445              | -0.729208 | 2.254822    |
| H                          | 3.756062              | 0.766062  | 0.635130    |
| C                          | 1.843151              | 1.343383  | 0.025232    |
| O                          | 1.746326              | 1.736465  | -1.116887   |
| O                          | 1.138340              | 1.878782  | 1.020965    |
| H                          | 1.321697              | 1.303323  | 1.802570    |
| H                          | 3.484940              | -0.268561 | -1.530901   |
| H                          | 3.808303              | -1.505640 | -0.308824   |
| S                          | 1.610686              | -1.763210 | -1.186245   |
| H                          | 1.023541              | -0.778349 | -1.892106   |
| C                          | -2.008488             | -0.774558 | -0.561451   |
| C                          | -1.545780             | 0.569386  | -1.132032   |
| N                          | -3.443110             | -1.059229 | -0.657615   |
| H                          | -3.989483             | -0.214786 | -0.506002   |
| H                          | -3.689117             | -1.434099 | -1.565944   |
| H                          | -1.474459             | -1.563567 | -1.103730   |
| C                          | -1.568195             | -0.960986 | 0.898387    |
| O                          | -0.534756             | -0.525256 | 1.349990    |

| Nov 11, 22 15:56           | dimers_structures.xyz |           | Page 27/325 |
|----------------------------|-----------------------|-----------|-------------|
| O -2.419498                | -1.683377             | 1.628653  |             |
| H -3.188641                | -1.845568             | 1.025855  |             |
| H -0.462787                | 0.643559              | -1.118879 |             |
| H -1.886444                | 0.650918              | -2.164333 |             |
| S -2.219047                | 2.037958              | -0.243978 |             |
| H -1.337839                | 1.981017              | 0.775122  |             |
| 28                         |                       |           |             |
| Dimer 61 of the n...n type |                       |           |             |
| C -2.619067                | -0.930070             | -0.466048 |             |
| C -2.436396                | 0.303486              | -1.361942 |             |
| N -3.650095                | -0.839724             | 0.570134  |             |
| H -3.793406                | 0.125340              | 0.857202  |             |
| H -4.536482                | -1.213542             | 0.254640  |             |
| H -2.859383                | -1.772302             | -1.123433 |             |
| C -1.283745                | -1.328757             | 0.188237  |             |
| O -0.224549                | -1.322298             | -0.400090 |             |
| O -1.392623                | -1.700250             | 1.460140  |             |
| H -2.357978                | -1.582164             | 1.665709  |             |
| H -1.602333                | 0.139039              | -2.043405 |             |
| H -3.339733                | 0.462085              | -1.950975 |             |
| S -2.188089                | 1.883500              | -0.439186 |             |
| H -1.093136                | 1.509786              | 0.268396  |             |
| C 2.518008                 | 0.745282              | -0.531086 |             |
| C 2.396905                 | 1.364469              | 0.866855  |             |
| N 1.444529                 | 0.988499              | -1.491667 |             |
| H 0.542051                 | 0.775987              | -1.080131 |             |
| H 1.435995                 | 1.952275              | -1.803755 |             |
| H 3.437001                 | 1.159608              | -0.965857 |             |
| C 2.801671                 | -0.764950             | -0.479414 |             |
| O 3.319113                 | -1.324548             | 0.460338  |             |
| O 2.496281                 | -1.405692             | -1.609130 |             |
| H 1.986964                 | -0.755216             | -2.145915 |             |
| H 3.275593                 | 1.099697              | 1.454252  |             |
| H 2.354763                 | 2.450288              | 0.773965  |             |
| S 0.884926                 | 0.911347              | 1.815787  |             |
| H 0.989622                 | -0.424313             | 1.674743  |             |
| 28                         |                       |           |             |
| Dimer 62 of the n...n type |                       |           |             |
| C -2.669327                | 0.075374              | 0.729207  |             |
| C -3.034721                | 0.783545              | -0.579680 |             |
| N -1.828536                | 0.824953              | 1.664936  |             |
| H -1.152779                | 1.401379              | 1.169030  |             |
| H -2.380148                | 1.425345              | 2.265719  |             |
| H -3.607520                | -0.169794             | 1.240450  |             |
| C -2.014597                | -1.292488             | 0.463742  |             |
| O -2.304256                | -2.011888             | -0.464352 |             |
| O -1.107921                | -1.632731             | 1.382494  |             |
| H -1.042938                | -0.833547             | 1.968007  |             |
| H -3.708367                | 0.162177              | -1.167881 |             |
| H -3.534371                | 1.725221              | -0.351934 |             |
| S -1.574995                | 1.228733              | -1.616256 |             |
| H -1.252341                | -0.038591             | -1.942044 |             |
| C 2.669284                 | -0.074161             | 0.729375  |             |
| C 3.034796                 | -0.784380             | -0.578354 |             |
| N 1.828522                 | -0.822326             | 1.666282  |             |
| H 1.152695                 | -1.399438             | 1.171270  |             |
| H 2.380172                 | -1.421895             | 2.267855  |             |
| H 3.607428                 | 0.171895              | 1.240289  |             |
| C 2.014463                 | 1.293223              | 0.461760  |             |
| O 2.303977                 | 2.011129              | -0.467534 |             |
| O 1.107865                 | 1.634926              | 1.380052  |             |
| H 1.042953                 | 0.836698              | 1.966851  |             |
| H 3.708459                 | -0.163919             | -1.167499 |             |
| H 3.534509                 | -1.725649             | -0.349069 |             |
| S 1.575203                 | -1.231351             | -1.614320 |             |
| H 1.252305                 | 0.035435              | -1.941938 |             |
| 28                         |                       |           |             |
| Dimer 63 of the n...n type |                       |           |             |
| C 2.658320                 | 0.907971              | 0.296038  |             |

| Nov 11, 22 15:56           | dimers_structures.xyz |           | Page 28/325 |
|----------------------------|-----------------------|-----------|-------------|
| C 3.479933                 | -0.290912             | 0.784468  |             |
| N 1.454024                 | 1.221670              | 1.066146  |             |
| H 1.029026                 | 0.369366              | 1.419803  |             |
| H 1.660053                 | 1.817986              | 1.858516  |             |
| H 3.314477                 | 1.785313              | 0.321910  |             |
| C 2.281132                 | 0.755770              | -1.188394 |             |
| O 2.984376                 | 0.210231              | -2.006844 |             |
| O 1.104491                 | 1.300777              | -1.511164 |             |
| H 0.722072                 | 1.642089              | -0.665954 |             |
| H 4.381351                 | -0.402084             | 0.184224  |             |
| H 3.766122                 | -0.129799             | 1.823741  |             |
| S 2.557167                 | -1.890564             | 0.764617  |             |
| H 2.537239                 | -2.026286             | -0.577237 |             |
| C -2.035835                | -0.806580             | 0.575523  |             |
| C -2.005079                | 0.519645              | 1.345563  |             |
| N -0.882769                | -1.120678             | -0.266535 |             |
| H -0.537162                | -0.296689             | -0.750036 |             |
| H -0.117518                | -1.529632             | 0.258043  |             |
| H -2.131447                | -1.606642             | 1.318776  |             |
| C -3.314661                | -0.922899             | -0.275282 |             |
| O -4.383005                | -0.455856             | 0.048896  |             |
| O -3.148023                | -1.618007             | -1.401086 |             |
| H -2.179414                | -1.824358             | -1.425550 |             |
| H -2.912098                | 0.622467              | 1.939342  |             |
| H -1.151036                | 0.534842              | 2.020946  |             |
| S -1.819691                | 2.012145              | 0.280801  |             |
| H -3.025637                | 1.916061              | -0.316387 |             |
| 28                         |                       |           |             |
| Dimer 64 of the n...n type |                       |           |             |
| C 1.596213                 | -0.229425             | -0.044418 |             |
| C 2.498483                 | -0.604055             | 1.133730  |             |
| N 1.647323                 | -1.105512             | -1.216553 |             |
| H 2.596012                 | -1.432238             | -1.383158 |             |
| H 1.045965                 | -1.913174             | -1.100853 |             |
| H 0.566413                 | -0.215173             | 0.321550  |             |
| C 1.821468                 | 1.221592              | -0.495842 |             |
| O 2.146867                 | 2.118304              | 0.248535  |             |
| O 1.596445                 | 1.416647              | -1.797265 |             |
| H 1.424425                 | 0.510632              | -2.157240 |             |
| H 2.333772                 | 0.079563              | 1.965314  |             |
| H 2.261630                 | -1.617091             | 1.459774  |             |
| S 4.297486                 | -0.623365             | 0.720846  |             |
| H 4.413899                 | 0.707818              | 0.539063  |             |
| C -2.993770                | -0.100586             | 0.962784  |             |
| C -2.086226                | -1.325203             | 0.799947  |             |
| N -4.358504                | -0.222888             | 0.447147  |             |
| H -4.377825                | -0.786726             | -0.399223 |             |
| H -4.977849                | -0.649939             | 1.125220  |             |
| H -3.057596                | 0.114846              | 2.035390  |             |
| C -2.347348                | 1.159551              | 0.358649  |             |
| O -1.154650                | 1.370571              | 0.365838  |             |
| O -3.223715                | 2.018384              | -0.157334 |             |
| H -4.098483                | 1.558936              | -0.078179 |             |
| H -1.128336                | -1.150300             | 1.287611  |             |
| H -2.557740                | -2.187602             | 1.271431  |             |
| S -1.806305                | -1.823455             | -0.954000 |             |
| H -1.177417                | -0.694130             | -1.337688 |             |
| 28                         |                       |           |             |
| Dimer 65 of the n...n type |                       |           |             |
| C 3.208344                 | -0.304694             | -0.844609 |             |
| C 1.723644                 | -0.660597             | -0.711639 |             |
| N 4.166132                 | -1.351461             | -0.477253 |             |
| H 3.808724                 | -1.916564             | 0.289134  |             |
| H 4.366267                 | -1.966468             | -1.256566 |             |
| H 3.386783                 | -0.036844             | -1.892108 |             |
| C 3.546493                 | 0.975443              | -0.057782 |             |
| O 2.797351                 | 1.920915              | 0.040637  |             |
| O 4.762080                 | 0.962811              | 0.490434  |             |
| H 5.114925                 | 0.058870              | 0.286029  |             |

| Nov 11, 22 15:56           |           |           |           | dimers_structures.xyz | Page 29/325 |
|----------------------------|-----------|-----------|-----------|-----------------------|-------------|
| H                          | 1.102631  | 0.164264  | -1.054001 |                       |             |
| H                          | 1.505993  | -1.539818 | -1.317825 |                       |             |
| S                          | 1.218255  | -1.102838 | 1.006181  |                       |             |
| H                          | 1.284821  | 0.149850  | 1.499688  |                       |             |
| C                          | -2.340788 | -0.463305 | 0.571778  |                       |             |
| C                          | -3.698902 | -0.982590 | 0.087672  |                       |             |
| N                          | -2.360058 | 0.418687  | 1.741388  |                       |             |
| H                          | -3.228457 | 0.944927  | 1.791732  |                       |             |
| H                          | -2.248770 | -0.098938 | 2.604333  |                       |             |
| H                          | -1.720088 | -1.331577 | 0.810072  |                       |             |
| C                          | -1.580531 | 0.236384  | -0.567821 |                       |             |
| O                          | -1.538873 | -0.184164 | -1.702592 |                       |             |
| O                          | -0.938660 | 1.341343  | -0.191715 |                       |             |
| H                          | -1.155003 | 1.430605  | 0.773388  |                       |             |
| H                          | -3.560835 | -1.649598 | -0.761999 |                       |             |
| H                          | -4.183453 | -1.534422 | 0.893335  |                       |             |
| S                          | -4.887170 | 0.350215  | -0.381044 |                       |             |
| H                          | -4.218162 | 0.766012  | -1.476056 |                       |             |
| 28                         |           |           |           |                       |             |
| Dimer 66 of the n...n type |           |           |           |                       |             |
| C                          | -2.312119 | -0.731052 | 0.196646  |                       |             |
| C                          | -3.377704 | -0.687360 | -0.902951 |                       |             |
| N                          | -2.782559 | -1.010396 | 1.554967  |                       |             |
| H                          | -3.709692 | -0.621112 | 1.706984  |                       |             |
| H                          | -2.821786 | -2.005213 | 1.740046  |                       |             |
| H                          | -1.587131 | -1.505070 | -0.074797 |                       |             |
| C                          | -1.477513 | 0.560052  | 0.214413  |                       |             |
| O                          | -1.149212 | 1.158169  | -0.785847 |                       |             |
| O                          | -1.112465 | 0.950511  | 1.435602  |                       |             |
| H                          | -1.548112 | 0.296365  | 2.041078  |                       |             |
| H                          | -2.908717 | -0.518186 | -1.871080 |                       |             |
| H                          | -3.907709 | -1.639503 | -0.930217 |                       |             |
| S                          | -4.678491 | 0.595287  | -0.634905 |                       |             |
| H                          | -3.876175 | 1.660334  | -0.837818 |                       |             |
| C                          | 3.171253  | -0.043905 | -0.969486 |                       |             |
| C                          | 1.751662  | -0.620213 | -1.004404 |                       |             |
| N                          | 4.262905  | -1.008030 | -0.805466 |                       |             |
| H                          | 3.979195  | -1.777761 | -0.204200 |                       |             |
| H                          | 4.557479  | -1.394159 | -1.694189 |                       |             |
| H                          | 3.330798  | 0.487020  | -1.914961 |                       |             |
| C                          | 3.305631  | 1.046492  | 0.109209  |                       |             |
| O                          | 2.424483  | 1.827618  | 0.387509  |                       |             |
| O                          | 4.502448  | 1.075158  | 0.697582  |                       |             |
| H                          | 4.988232  | 0.304222  | 0.307314  |                       |             |
| H                          | 1.023384  | 0.168879  | -1.181607 |                       |             |
| H                          | 1.681479  | -1.353944 | -1.807595 |                       |             |
| S                          | 1.280136  | -1.519673 | 0.537216  |                       |             |
| H                          | 1.120730  | -0.418447 | 1.298239  |                       |             |
| 28                         |           |           |           |                       |             |
| Dimer 67 of the n...n type |           |           |           |                       |             |
| C                          | 2.001090  | -0.769141 | -0.406507 |                       |             |
| C                          | 3.103360  | -0.817907 | 0.655666  |                       |             |
| N                          | 2.432565  | -0.741044 | -1.805654 |                       |             |
| H                          | 3.280676  | -0.189176 | -1.910742 |                       |             |
| H                          | 2.617201  | -1.672697 | -2.157673 |                       |             |
| H                          | 1.373190  | -1.656514 | -0.269915 |                       |             |
| C                          | 1.036641  | 0.402854  | -0.162326 |                       |             |
| O                          | 0.749796  | 0.820828  | 0.935960  |                       |             |
| O                          | 0.502498  | 0.895281  | -1.281627 |                       |             |
| H                          | 0.973007  | 0.415430  | -2.010250 |                       |             |
| H                          | 2.662447  | -0.884254 | 1.649289  |                       |             |
| H                          | 3.727197  | -1.695986 | 0.488169  |                       |             |
| S                          | 4.252836  | 0.624990  | 0.603634  |                       |             |
| H                          | 3.350631  | 1.540077  | 1.012700  |                       |             |
| C                          | -3.123006 | -0.004971 | -0.438505 |                       |             |
| C                          | -3.071252 | -1.326881 | 0.336713  |                       |             |
| N                          | -2.446732 | 0.034418  | -1.733854 |                       |             |
| H                          | -1.554867 | -0.451692 | -1.693406 |                       |             |
| H                          | -3.010144 | -0.392176 | -2.459592 |                       |             |

| Nov 11, 22 15:56           |           |           |           | dimers_structures.xyz | Page 30/325 |
|----------------------------|-----------|-----------|-----------|-----------------------|-------------|
| H                          | -4.182320 | 0.218474  | -0.613169 |                       |             |
| C                          | -2.639903 | 1.177286  | 0.421631  |                       |             |
| O                          | -2.804445 | 1.241641  | 1.619634  |                       |             |
| O                          | -2.073973 | 2.159430  | -0.275688 |                       |             |
| H                          | -1.976843 | 1.804737  | -1.192502 |                       |             |
| H                          | -3.626656 | -1.233226 | 1.268844  |                       |             |
| H                          | -3.525372 | -2.115031 | -0.264503 |                       |             |
| S                          | -1.367644 | -1.922508 | 0.709530  |                       |             |
| H                          | -1.004651 | -0.886177 | 1.492424  |                       |             |
| 28                         |           |           |           |                       |             |
| Dimer 68 of the n...n type |           |           |           |                       |             |
| C                          | 2.756740  | 0.607552  | -0.748556 |                       |             |
| C                          | 2.567870  | 1.523758  | 0.478407  |                       |             |
| N                          | 1.727886  | 0.823064  | -1.746281 |                       |             |
| H                          | 0.800530  | 0.662833  | -1.367043 |                       |             |
| H                          | 1.847460  | 0.200312  | -2.537952 |                       |             |
| H                          | 3.727942  | 0.869466  | -1.179147 |                       |             |
| C                          | 2.884473  | -0.832881 | -0.250164 |                       |             |
| O                          | 1.999388  | -1.668490 | -0.286187 |                       |             |
| O                          | 4.082079  | -1.075757 | 0.282314  |                       |             |
| H                          | 4.105740  | -1.980858 | 0.635105  |                       |             |
| H                          | 3.373704  | 1.361762  | 1.193238  |                       |             |
| H                          | 2.598995  | 2.560536  | 0.143328  |                       |             |
| S                          | 0.940928  | 1.357146  | 1.331624  |                       |             |
| H                          | 0.980365  | 0.031732  | 1.579723  |                       |             |
| C                          | -2.856641 | -1.063527 | -0.237066 |                       |             |
| C                          | -3.014282 | 0.185470  | -1.119654 |                       |             |
| N                          | -3.769166 | -1.039103 | 0.895256  |                       |             |
| H                          | -3.554439 | -0.238640 | 1.484672  |                       |             |
| H                          | -3.624199 | -1.862275 | 1.471623  |                       |             |
| H                          | -3.113494 | -1.919238 | -0.873522 |                       |             |
| C                          | -1.387731 | -1.277700 | 0.151433  |                       |             |
| O                          | -0.998884 | -1.426072 | 1.290515  |                       |             |
| O                          | -0.588849 | -1.294238 | -0.918954 |                       |             |
| H                          | 0.352104  | -1.455672 | -0.654034 |                       |             |
| H                          | -2.392093 | 0.101075  | -2.008388 |                       |             |
| H                          | -4.057115 | 0.269871  | -1.425421 |                       |             |
| S                          | -2.634420 | 1.780704  | -0.269934 |                       |             |
| H                          | -1.313116 | 1.566206  | -0.079957 |                       |             |
| 28                         |           |           |           |                       |             |
| Dimer 69 of the n...n type |           |           |           |                       |             |
| C                          | -2.187292 | 0.620953  | 0.655598  |                       |             |
| C                          | -3.116577 | -0.542366 | 1.013347  |                       |             |
| N                          | -2.792532 | 1.951335  | 0.568584  |                       |             |
| H                          | -3.729540 | 1.897192  | 0.176330  |                       |             |
| H                          | -2.856478 | 2.391897  | 1.478326  |                       |             |
| H                          | -1.400148 | 0.665620  | 1.417043  |                       |             |
| C                          | -1.415955 | 0.345892  | -0.643043 |                       |             |
| O                          | -1.060955 | -0.753422 | -1.000830 |                       |             |
| O                          | -1.108350 | 1.451699  | -1.326985 |                       |             |
| H                          | -1.585515 | 2.177977  | -0.849106 |                       |             |
| H                          | -2.545172 | -1.465897 | 1.095354  |                       |             |
| H                          | -3.596669 | -0.339460 | 1.970643  |                       |             |
| S                          | -4.492782 | -0.791090 | -0.190300 |                       |             |
| H                          | -3.718463 | -1.227927 | -1.204406 |                       |             |
| C                          | 1.889036  | 0.187149  | -0.434346 |                       |             |
| C                          | 3.303935  | 0.555797  | -0.896488 |                       |             |
| N                          | 1.301867  | 1.044982  | 0.598486  |                       |             |
| H                          | 2.017079  | 1.382294  | 1.238363  |                       |             |
| H                          | 0.844421  | 1.848841  | 0.185575  |                       |             |
| H                          | 1.237289  | 0.222912  | -1.311454 |                       |             |
| C                          | 1.828300  | -1.277447 | 0.031724  |                       |             |
| O                          | 2.395668  | -2.180984 | -0.540633 |                       |             |
| O                          | 1.093742  | -1.475698 | 1.126084  |                       |             |
| H                          | 0.764083  | -0.576383 | 1.370038  |                       |             |
| H                          | 3.623049  | -0.111331 | -1.695733 |                       |             |
| S                          | 3.304164  | 1.579478  | -1.271488 |                       |             |
| H                          | 4.564584  | 0.523698  | 0.451701  |                       |             |
| H                          | 4.558189  | -0.813800 | 0.626778  |                       |             |



| Nov 11, 22 15:56           | dimers_structures.xyz         | Page 31/325 |
|----------------------------|-------------------------------|-------------|
| 28                         |                               |             |
| Dimer 70 of the n...n type |                               |             |
| C                          | 1.970457 -0.354905 0.803018   |             |
| C                          | 2.592857 1.038164 0.652406    |             |
| N                          | 2.771507 -1.361818 1.499682   |             |
| H                          | 3.760882 -1.238907 1.297967   |             |
| H                          | 2.644075 -1.313602 2.503208   |             |
| H                          | 1.032302 -0.233986 1.357142   |             |
| C                          | 1.538744 -0.926294 -0.558410  |             |
| O                          | 1.089236 -0.246006 -1.456032  |             |
| O                          | 1.651590 -2.247025 -0.649125  |             |
| H                          | 2.080670 -2.517763 0.204114   |             |
| H                          | 1.893738 1.716081 0.165573    |             |
| H                          | 2.830247 1.432538 1.640345    |             |
| S                          | 4.181701 1.045181 -0.283524   |             |
| H                          | 3.643175 0.740193 -1.481951   |             |
| C                          | -1.802863 -0.391640 -0.167188 |             |
| C                          | -1.356569 0.987664 0.330906   |             |
| N                          | -1.951802 -0.543199 -1.614851 |             |
| H                          | -2.361007 0.298054 -2.015418  |             |
| H                          | -1.043037 -0.677484 -2.046251 |             |
| H                          | -1.055147 -1.121346 0.164342  |             |
| C                          | -3.096258 -0.854576 0.522583  |             |
| O                          | -3.380194 -0.586939 1.668162  |             |
| O                          | -3.872588 -1.614508 -0.251397 |             |
| H                          | -3.418427 -1.619202 -1.131762 |             |
| H                          | -1.197512 0.972097 1.408345   |             |
| H                          | -0.424404 1.248138 -0.167697  |             |
| S                          | -2.531321 2.346466 -0.081436  |             |
| H                          | -3.512137 1.949310 0.754842   |             |
| 28                         |                               |             |
| Dimer 71 of the n...n type |                               |             |
| C                          | 3.277871 -0.078002 -0.459018  |             |
| C                          | 3.035813 1.433691 -0.389451   |             |
| N                          | 2.629597 -0.805014 -1.550978  |             |
| H                          | 1.689822 -0.454422 -1.716184  |             |
| H                          | 3.152471 -0.722954 -2.414739  |             |
| H                          | 4.359706 -0.223647 -0.563471  |             |
| C                          | 2.938043 -0.772269 0.872065   |             |
| O                          | 3.047796 -0.240993 1.954136   |             |
| O                          | 2.551020 -2.040010 0.733303   |             |
| H                          | 2.461748 -2.172594 -0.242649  |             |
| H                          | 3.615920 1.869386 0.422661    |             |
| H                          | 3.347572 1.891320 -1.328441   |             |
| S                          | 1.265214 1.902777 -0.175354   |             |
| H                          | 1.145379 1.423833 1.079132    |             |
| C                          | -2.689714 0.686356 -0.483453  |             |
| C                          | -1.634786 -0.153747 -1.211845 |             |
| N                          | -2.203740 1.565672 0.582833   |             |
| H                          | -1.450272 1.120843 1.100759   |             |
| H                          | -1.862371 2.446204 0.216986   |             |
| H                          | -3.184099 1.313479 -1.233835  |             |
| C                          | -3.815959 -0.199435 0.078731  |             |
| O                          | -4.225708 -1.194665 -0.474551 |             |
| O                          | -4.328467 0.244272 1.227520   |             |
| H                          | -3.776504 1.032914 1.459834   |             |
| H                          | -2.101118 -0.740776 -2.001309 |             |
| H                          | -0.889867 0.508220 -1.651101  |             |
| S                          | -0.691636 -1.283628 -0.099457 |             |
| H                          | -1.691356 -2.171192 0.080931  |             |
| 28                         |                               |             |
| Dimer 72 of the n...n type |                               |             |
| C                          | 2.357116 -0.214442 -0.721596  |             |
| C                          | 3.694630 -0.896328 -0.414264  |             |
| N                          | 2.418099 1.004825 -1.530960   |             |
| H                          | 3.283787 1.511787 -1.365347   |             |
| H                          | 2.351929 0.801815 -2.520684   |             |
| H                          | 1.728146 -0.939984 -1.245708  |             |
| C                          | 1.579592 0.083786 0.571302    |             |

| Nov 11, 22 15:56           | dimers_structures.xyz         | Page 32/325 |
|----------------------------|-------------------------------|-------------|
| O                          | 1.524173 -0.677147 1.511304   |             |
| O                          | 0.939466 1.252546 0.560801    |             |
| H                          | 1.172956 1.650943 -0.317451   |             |
| H                          | 3.525776 -1.810960 0.152030   |             |
| H                          | 4.194596 -1.147953 -1.349664  |             |
| S                          | 4.884907 0.170288 0.510289    |             |
| H                          | 4.191908 0.193770 1.667340    |             |
| C                          | -3.215511 -0.467491 0.767057  |             |
| C                          | -1.731757 -0.793089 0.567383  |             |
| N                          | -4.176966 -1.420670 0.205611  |             |
| H                          | -3.824932 -1.820928 -0.660628 |             |
| H                          | -4.369930 -2.179561 0.847982  |             |
| H                          | -3.392803 -0.406978 1.846904  |             |
| C                          | -3.551392 0.941306 0.244394   |             |
| O                          | -2.797086 1.884469 0.323442   |             |
| O                          | -4.771167 1.040584 -0.285703  |             |
| H                          | -5.128769 0.116253 -0.257327  |             |
| H                          | -1.109577 -0.051526 1.063126  |             |
| H                          | -1.514555 -1.773402 0.991079  |             |
| S                          | -1.225905 -0.894509 -1.203363 |             |
| H                          | -1.299653 0.429101 -1.449435  |             |
| 28                         |                               |             |
| Dimer 73 of the n...n type |                               |             |
| C                          | -2.944950 -0.733070 -0.438123 |             |
| C                          | -3.474791 0.328388 0.531100   |             |
| N                          | -2.375814 -1.944189 0.159378  |             |
| H                          | -1.886336 -1.730752 1.024686  |             |
| H                          | -3.092129 -2.629147 0.368493  |             |
| H                          | -3.784353 -1.038989 -1.073393 |             |
| C                          | -1.919383 -0.144076 -1.422021 |             |
| O                          | -1.936025 1.000055 -1.814593  |             |
| O                          | -1.000599 -1.025218 -1.823832 |             |
| H                          | -1.194251 -1.842360 -1.297787 |             |
| H                          | -3.948001 1.139403 -0.020195  |             |
| H                          | -4.214716 -0.125666 1.189913  |             |
| S                          | -2.190572 1.051171 1.642732   |             |
| H                          | -1.593985 1.802339 0.696561   |             |
| C                          | 1.404371 -0.360356 0.355202   |             |
| C                          | 1.313663 0.743452 -0.702943   |             |
| N                          | 1.304625 0.056854 1.755214    |             |
| H                          | 1.739986 0.965913 1.892044    |             |
| H                          | 0.335618 0.125485 2.046774    |             |
| H                          | 0.589713 -1.062820 0.155635   |             |
| C                          | 2.678005 -1.204148 0.174964   |             |
| O                          | 3.158586 -1.474220 -0.902778  |             |
| O                          | 3.194871 -1.643294 1.323014   |             |
| H                          | 2.626000 -1.227725 2.021740   |             |
| H                          | 1.350096 0.307511 -1.698558   |             |
| H                          | 0.366990 1.271176 -0.601430   |             |
| S                          | 2.620285 2.034654 -0.545503   |             |
| H                          | 3.652111 1.244048 -0.905846   |             |
| 28                         |                               |             |
| Dimer 74 of the n...n type |                               |             |
| C                          | -2.122182 0.093390 0.860262   |             |
| C                          | -3.062986 -1.066037 0.513068  |             |
| N                          | -2.691063 1.195843 1.636564   |             |
| H                          | -3.663941 1.352032 1.384266   |             |
| H                          | -2.646705 1.015199 2.632076   |             |
| H                          | -1.286890 -0.325417 1.433983  |             |
| C                          | -1.460146 0.670896 -0.400198  |             |
| O                          | -1.121845 -0.002878 -1.349284 |             |
| O                          | -1.226931 1.979290 -0.336288  |             |
| H                          | -1.640363 2.261995 0.521140   |             |
| H                          | -2.518685 -1.844079 -0.020236 |             |
| H                          | -3.467831 -1.487660 1.433031  |             |
| S                          | -4.526478 -0.559310 -0.489095 |             |
| H                          | -3.840931 -0.289143 -1.618760 |             |
| C                          | 1.865937 0.375775 -0.196461   |             |
| C                          | 1.504769 -0.963620 0.456923   |             |

| Nov 11, 22 15:56           |           |           |           | dimers_structures.xyz | Page 33/325 |
|----------------------------|-----------|-----------|-----------|-----------------------|-------------|
| N                          | 1.905565  | 0.397015  | -1.659415 |                       |             |
| H                          | 2.309376  | -0.467088 | -2.013989 |                       |             |
| H                          | 0.963673  | 0.471174  | -2.030622 |                       |             |
| H                          | 1.119567  | 1.112344  | 0.120721  |                       |             |
| C                          | 3.188861  | 0.935191  | 0.349732  |                       |             |
| O                          | 3.563205  | 0.786939  | 1.491346  |                       |             |
| C                          | 3.882669  | 1.637667  | -0.547409 |                       |             |
| H                          | 3.365737  | 1.545676  | -1.387862 |                       |             |
| H                          | 1.412236  | -0.847868 | 1.535963  |                       |             |
| H                          | 0.554179  | -1.307650 | 0.050735  |                       |             |
| S                          | 2.705002  | -2.316692 | 0.097217  |                       |             |
| H                          | 3.720373  | -1.805214 | 0.822683  |                       |             |
| 28                         |           |           |           |                       |             |
| Dimer 75 of the n...n type |           |           |           |                       |             |
| C                          | -3.158494 | 0.674716  | -0.374578 |                       |             |
| C                          | -3.536053 | -0.145117 | 0.864723  |                       |             |
| N                          | -3.404580 | 0.040564  | -1.672270 |                       |             |
| H                          | -3.243673 | -0.962627 | -1.624917 |                       |             |
| H                          | -4.353493 | 0.194074  | -1.991195 |                       |             |
| H                          | -3.734360 | 1.606341  | -0.340270 |                       |             |
| C                          | -1.688264 | 1.122864  | -0.320595 |                       |             |
| O                          | -1.108363 | 1.425008  | 0.697804  |                       |             |
| O                          | -1.093332 | 1.151924  | -1.515198 |                       |             |
| H                          | -1.781725 | 0.809355  | -2.142859 |                       |             |
| H                          | -3.381990 | 0.440945  | 1.769245  |                       |             |
| H                          | -4.588094 | -0.422796 | 0.801941  |                       |             |
| S                          | -2.600844 | -1.730094 | 1.018894  |                       |             |
| H                          | -1.472670 | -1.178594 | 1.503067  |                       |             |
| C                          | 1.912488  | -0.207489 | -0.796862 |                       |             |
| C                          | 2.010683  | 1.254909  | -0.347665 |                       |             |
| N                          | 0.833606  | -0.992661 | -0.186372 |                       |             |
| H                          | 0.572410  | -0.585455 | 0.707192  |                       |             |
| H                          | 0.010189  | -1.005463 | -0.774282 |                       |             |
| H                          | 1.771873  | -0.207206 | -1.882819 |                       |             |
| C                          | 3.247211  | -0.941997 | -0.567065 |                       |             |
| O                          | 4.330557  | -0.452090 | -0.798810 |                       |             |
| O                          | 3.101269  | -2.180658 | -0.100067 |                       |             |
| H                          | 2.117112  | -2.272533 | 0.021687  |                       |             |
| H                          | 2.833986  | 1.747997  | -0.861883 |                       |             |
| H                          | 1.078741  | 1.763450  | -0.578733 |                       |             |
| S                          | 2.231927  | 1.456674  | 1.472827  |                       |             |
| H                          | 3.504706  | 1.011126  | 1.519207  |                       |             |
| 28                         |           |           |           |                       |             |
| Dimer 76 of the n...n type |           |           |           |                       |             |
| C                          | -3.049040 | -0.299067 | -0.759167 |                       |             |
| C                          | -2.159612 | 0.948406  | -0.776916 |                       |             |
| N                          | -4.451641 | -0.099237 | -0.385120 |                       |             |
| H                          | -4.538118 | 0.637591  | 0.310644  |                       |             |
| H                          | -5.020385 | 0.152591  | -1.184397 |                       |             |
| H                          | -3.026188 | -0.728011 | -1.767330 |                       |             |
| C                          | -2.450614 | -1.398922 | 0.136550  |                       |             |
| O                          | -1.261839 | -1.603001 | 0.245568  |                       |             |
| O                          | -3.364897 | -2.132282 | 0.769593  |                       |             |
| H                          | -4.228955 | -1.705928 | 0.533546  |                       |             |
| H                          | -1.159581 | 0.698910  | -1.125372 |                       |             |
| H                          | -2.587098 | 1.685598  | -1.456991 |                       |             |
| S                          | -2.031070 | 1.802559  | 0.851261  |                       |             |
| H                          | -1.370193 | 0.813565  | 1.484933  |                       |             |
| C                          | 2.689969  | -0.112640 | 0.860669  |                       |             |
| C                          | 1.389629  | 0.564483  | 0.416080  |                       |             |
| N                          | 3.812739  | 0.774309  | 1.178731  |                       |             |
| H                          | 3.808115  | 1.592013  | 0.573790  |                       |             |
| H                          | 3.777232  | 1.092869  | 2.139440  |                       |             |
| H                          | 2.459836  | -0.699673 | 1.757222  |                       |             |
| C                          | 3.159686  | -1.155041 | -0.170544 |                       |             |
| O                          | 2.407054  | -1.848533 | -0.816647 |                       |             |
| O                          | 4.486245  | -1.246579 | -0.273539 |                       |             |
| H                          | 4.829430  | -0.533706 | 0.324288  |                       |             |
| H                          | 0.607485  | -0.177847 | 0.267580  |                       |             |

| Nov 11, 22 15:56           |           |           |           | dimers_structures.xyz | Page 34/325 |
|----------------------------|-----------|-----------|-----------|-----------------------|-------------|
| H                          | 1.069710  | 1.266576  | 1.185312  |                       |             |
| S                          | 1.561001  | 1.572945  | -1.119060 |                       |             |
| H                          | 1.759509  | 0.531728  | -1.952992 |                       |             |
| 28                         |           |           |           |                       |             |
| Dimer 77 of the n...n type |           |           |           |                       |             |
| C                          | -2.838337 | 0.271316  | -0.166823 |                       |             |
| C                          | -2.779033 | -1.204518 | -0.573859 |                       |             |
| N                          | -2.402513 | 1.251592  | -1.163431 |                       |             |
| H                          | -1.591951 | 0.908584  | -1.674421 |                       |             |
| H                          | -3.135439 | 1.455332  | -1.832285 |                       |             |
| H                          | -3.881910 | 0.496153  | 0.084266  |                       |             |
| C                          | -2.073169 | 0.533787  | 1.142373  |                       |             |
| O                          | -1.925910 | -0.284342 | 2.019834  |                       |             |
| O                          | -1.604798 | 1.782486  | 1.240939  |                       |             |
| H                          | -1.812069 | 2.194976  | 0.364830  |                       |             |
| H                          | -3.171125 | -1.828315 | 0.228293  |                       |             |
| H                          | -3.388391 | -1.355503 | -1.465025 |                       |             |
| S                          | -1.090268 | -1.793891 | -1.017447 |                       |             |
| H                          | -0.571702 | -1.682045 | 0.220946  |                       |             |
| C                          | 2.838417  | -0.271226 | -0.166770 |                       |             |
| C                          | 2.778936  | 1.204628  | -0.573772 |                       |             |
| N                          | 2.402820  | -1.251563 | -1.163405 |                       |             |
| H                          | 1.592162  | -0.908735 | -1.674372 |                       |             |
| H                          | 3.135782  | -1.455127 | -1.832275 |                       |             |
| H                          | 3.882010  | -0.495888 | 0.084390  |                       |             |
| C                          | 2.073188  | -0.533781 | 1.142367  |                       |             |
| O                          | 1.925668  | 0.284372  | 2.019775  |                       |             |
| O                          | 1.604982  | -1.782518 | 1.240922  |                       |             |
| H                          | 1.812612  | -2.195031 | 0.364931  |                       |             |
| H                          | 3.170883  | 1.828434  | 0.228440  |                       |             |
| H                          | 3.388353  | 1.355739  | -1.464880 |                       |             |
| S                          | 1.090134  | 1.793808  | -1.017464 |                       |             |
| H                          | 0.571249  | 1.681334  | 0.220748  |                       |             |
| 28                         |           |           |           |                       |             |
| Dimer 78 of the n...n type |           |           |           |                       |             |
| C                          | 2.171064  | 0.521655  | -0.706738 |                       |             |
| C                          | 1.686493  | -0.924983 | -0.832772 |                       |             |
| N                          | 3.591824  | 0.756215  | -0.984288 |                       |             |
| H                          | 4.159637  | -0.005130 | -0.619946 |                       |             |
| H                          | 3.768004  | 0.830097  | -1.979165 |                       |             |
| H                          | 1.581327  | 1.112327  | -1.415208 |                       |             |
| C                          | 1.835565  | 1.143625  | 0.659391  |                       |             |
| O                          | 0.866969  | 0.853951  | 1.324843  |                       |             |
| O                          | 2.708283  | 2.077172  | 1.045483  |                       |             |
| H                          | 3.424433  | 2.044457  | 0.361452  |                       |             |
| H                          | 0.602749  | -0.956092 | -0.785936 |                       |             |
| H                          | 1.995951  | -1.314146 | -1.803214 |                       |             |
| S                          | 2.399029  | -2.084050 | 0.410653  |                       |             |
| H                          | 1.772832  | -1.550916 | 1.479337  |                       |             |
| C                          | -2.171190 | 0.521623  | 0.706816  |                       |             |
| C                          | -1.686471 | -0.925016 | 0.832755  |                       |             |
| N                          | -3.592002 | 0.755881  | 0.984204  |                       |             |
| H                          | -4.159646 | -0.005735 | 0.620181  |                       |             |
| H                          | -3.768301 | 0.830318  | 1.979010  |                       |             |
| H                          | -1.581628 | 1.112346  | 1.415408  |                       |             |
| C                          | -1.835587 | 1.143756  | -0.659241 |                       |             |
| O                          | -0.866552 | 0.854645  | -1.324303 |                       |             |
| O                          | -2.708724 | 2.076740  | -1.045689 |                       |             |
| H                          | -3.424985 | 2.043700  | -0.361751 |                       |             |
| H                          | -0.602727 | -0.956031 | 0.785996  |                       |             |
| H                          | -1.996005 | -1.314275 | 1.803131  |                       |             |
| S                          | -2.398814 | -2.084022 | -0.410850 |                       |             |
| H                          | -1.772880 | -1.550478 | -1.479484 |                       |             |
| 28                         |           |           |           |                       |             |
| Dimer 79 of the n...n type |           |           |           |                       |             |
| C                          | 3.100540  | -0.016920 | 0.702061  |                       |             |
| C                          | 3.161253  | -1.262806 | -0.187517 |                       |             |
| N                          | 2.384122  | -0.156418 | 1.973037  |                       |             |
| H                          | 1.623782  | -0.826633 | 1.892240  |                       |             |

| Nov 11, 22 15:56           |           |           |           | dimers_structures.xyz | Page 35/325 |
|----------------------------|-----------|-----------|-----------|-----------------------|-------------|
| H                          | 2.997341  | -0.470687 | 2.715366  |                       |             |
| H                          | 4.133248  | 0.272619  | 0.927644  |                       |             |
| C                          | 2.530788  | 1.192737  | -0.062714 |                       |             |
| O                          | 2.709895  | 1.384589  | -1.243583 |                       |             |
| O                          | 1.841181  | 2.035456  | 0.706781  |                       |             |
| H                          | 1.806809  | 1.593248  | 1.592448  |                       |             |
| H                          | 3.754899  | -1.061318 | -1.077609 |                       |             |
| H                          | 3.622910  | -2.079776 | 0.367007  |                       |             |
| S                          | 1.503494  | -1.888092 | -0.703591 |                       |             |
| H                          | 1.219255  | -0.877065 | -1.549425 |                       |             |
| C                          | -2.135744 | -0.440138 | 0.693921  |                       |             |
| C                          | -1.088454 | 0.640906  | 0.408507  |                       |             |
| N                          | -1.972403 | -1.714823 | -0.009522 |                       |             |
| H                          | -1.641329 | -1.556336 | -0.958602 |                       |             |
| H                          | -1.293332 | -2.305995 | 0.454682  |                       |             |
| H                          | -2.101213 | -0.646146 | 1.770051  |                       |             |
| C                          | -3.563299 | 0.079752  | 0.450509  |                       |             |
| O                          | -3.907013 | 1.221535  | 0.657499  |                       |             |
| O                          | -4.407564 | -0.855475 | 0.012811  |                       |             |
| H                          | -3.844500 | -1.661051 | -0.111626 |                       |             |
| H                          | -1.280979 | 1.526434  | 1.011570  |                       |             |
| H                          | -0.105966 | 0.252164  | 0.661147  |                       |             |
| S                          | -0.971338 | 1.127769  | -1.364064 |                       |             |
| H                          | -2.209960 | 1.654376  | -1.453704 |                       |             |
| 28                         |           |           |           |                       |             |
| Dimer 80 of the n...n type |           |           |           |                       |             |
| C                          | 3.026002  | 0.979580  | 0.086458  |                       |             |
| C                          | 3.567433  | -0.374627 | -0.386600 |                       |             |
| N                          | 2.806258  | 1.129387  | 1.527398  |                       |             |
| H                          | 2.493387  | 0.254025  | 1.940190  |                       |             |
| H                          | 3.650339  | 1.418630  | 2.006644  |                       |             |
| H                          | 3.746195  | 1.745223  | -0.224094 |                       |             |
| C                          | 1.728493  | 1.355174  | -0.649996 |                       |             |
| O                          | 1.495174  | 1.061467  | -1.800272 |                       |             |
| O                          | 0.872507  | 2.055927  | 0.096555  |                       |             |
| H                          | 1.293667  | 2.086693  | 0.993958  |                       |             |
| H                          | 3.731418  | -0.358752 | -1.462914 |                       |             |
| H                          | 4.517160  | -0.572896 | 0.110135  |                       |             |
| S                          | 2.479495  | -1.806373 | 0.030836  |                       |             |
| H                          | 1.526583  | -1.545796 | -0.884402 |                       |             |
| C                          | -1.996504 | 0.545996  | 0.499802  |                       |             |
| C                          | -0.911376 | -0.452316 | 0.092913  |                       |             |
| N                          | -2.572964 | 0.377157  | 1.836132  |                       |             |
| H                          | -2.628830 | -0.607644 | 2.084562  |                       |             |
| H                          | -2.021048 | 0.849147  | 2.542123  |                       |             |
| H                          | -1.538141 | 1.539202  | 0.446938  |                       |             |
| C                          | -3.133918 | 0.584854  | -0.533431 |                       |             |
| O                          | -2.963892 | 0.453568  | -1.724953 |                       |             |
| O                          | -4.336719 | 0.806399  | -0.000757 |                       |             |
| H                          | -4.174447 | 0.819544  | 0.977037  |                       |             |
| H                          | -0.522402 | -0.193147 | -0.889183 |                       |             |
| H                          | -0.095566 | -0.406463 | 0.812157  |                       |             |
| S                          | -1.452074 | -2.213551 | 0.079892  |                       |             |
| H                          | -2.267461 | -2.105654 | -0.988960 |                       |             |
| 28                         |           |           |           |                       |             |
| Dimer 81 of the n...n type |           |           |           |                       |             |
| C                          | -2.110414 | 0.487177  | 0.632420  |                       |             |
| C                          | -2.706474 | -0.913977 | 0.794624  |                       |             |
| N                          | -2.855398 | 1.597728  | 1.229279  |                       |             |
| H                          | -3.857874 | 1.445650  | 1.147390  |                       |             |
| H                          | -2.632578 | 1.710638  | 2.210864  |                       |             |
| H                          | -1.116026 | 0.462368  | 1.090455  |                       |             |
| C                          | -1.837007 | 0.811849  | -0.844760 |                       |             |
| O                          | -1.507449 | -0.013551 | -1.666602 |                       |             |
| O                          | -1.954409 | 2.107222  | -1.139264 |                       |             |
| H                          | -2.289105 | 2.521506  | -0.303647 |                       |             |
| H                          | -2.035344 | -1.652062 | 0.360390  |                       |             |
| H                          | -2.828517 | -1.131903 | 1.855900  |                       |             |
| S                          | -4.384575 | -1.103062 | 0.050812  |                       |             |

| Nov 11, 22 15:56           |           |           |           | dimers_structures.xyz | Page 36/325 |
|----------------------------|-----------|-----------|-----------|-----------------------|-------------|
| H                          | -3.981610 | -1.012424 | -1.232968 |                       |             |
| C                          | 2.986331  | 0.385546  | -0.677745 |                       |             |
| C                          | 1.485753  | 0.245962  | -0.400658 |                       |             |
| N                          | 3.572496  | -0.598911 | -1.590975 |                       |             |
| H                          | 3.119318  | -1.503512 | -1.485869 |                       |             |
| H                          | 3.482683  | -0.311624 | -2.558007 |                       |             |
| H                          | 3.146634  | 1.381122  | -1.106807 |                       |             |
| C                          | 3.797723  | 0.395869  | 0.630827  |                       |             |
| O                          | 3.410172  | 0.910817  | 1.655557  |                       |             |
| O                          | 4.987487  | -0.196672 | 0.529632  |                       |             |
| H                          | 5.004054  | -0.560875 | -0.392522 |                       |             |
| H                          | 1.147223  | 1.060065  | 0.239693  |                       |             |
| H                          | 0.937143  | 0.286425  | -1.340041 |                       |             |
| S                          | 1.012698  | -1.363369 | 0.365937  |                       |             |
| H                          | 1.652480  | -1.161282 | 1.536211  |                       |             |
| 28                         |           |           |           |                       |             |
| Dimer 82 of the n...n type |           |           |           |                       |             |
| C                          | 2.198120  | -1.261467 | -0.446371 |                       |             |
| C                          | 3.401281  | -0.312859 | -0.450587 |                       |             |
| N                          | 1.233377  | -1.102449 | -1.537324 |                       |             |
| H                          | 1.137052  | -0.120534 | -1.785398 |                       |             |
| H                          | 1.525707  | -1.605510 | -2.366633 |                       |             |
| H                          | 2.593088  | -2.283160 | -0.497411 |                       |             |
| C                          | 1.446460  | -1.226249 | 0.896285  |                       |             |
| O                          | 1.974634  | -0.994539 | 1.959152  |                       |             |
| O                          | 0.151606  | -1.530564 | 0.791992  |                       |             |
| H                          | -0.023918 | -1.598110 | -0.178404 |                       |             |
| H                          | 4.058315  | -0.540181 | 0.387509  |                       |             |
| H                          | 3.957620  | -0.442293 | -1.379046 |                       |             |
| S                          | 2.951382  | 1.474778  | -0.391505 |                       |             |
| H                          | 2.423161  | 1.450105  | 0.848648  |                       |             |
| C                          | -2.197997 | 1.261129  | -0.447251 |                       |             |
| C                          | -3.401116 | 0.312518  | -0.451332 |                       |             |
| N                          | -1.232802 | 1.101385  | -1.537733 |                       |             |
| H                          | -1.136595 | 0.119353  | -1.785368 |                       |             |
| H                          | -1.524596 | 1.604203  | -2.367375 |                       |             |
| H                          | -2.592957 | 2.282779  | -0.499143 |                       |             |
| C                          | -1.446758 | 1.226851  | 0.895695  |                       |             |
| O                          | -1.975232 | 0.995743  | 1.958547  |                       |             |
| O                          | -0.151958 | 1.531380  | 0.791552  |                       |             |
| H                          | 0.023694  | 1.598001  | -0.178908 |                       |             |
| H                          | -4.058477 | 0.540343  | 0.386373  |                       |             |
| H                          | -3.957111 | 0.441333  | -1.380079 |                       |             |
| S                          | -2.951211 | -1.475092 | -0.390851 |                       |             |
| H                          | -2.424089 | -1.449555 | 0.849755  |                       |             |
| 28                         |           |           |           |                       |             |
| Dimer 83 of the n...n type |           |           |           |                       |             |
| C                          | -2.661274 | 0.135776  | -0.949903 |                       |             |
| C                          | -1.238423 | 0.607210  | -0.631196 |                       |             |
| N                          | -3.683939 | 1.181850  | -1.046800 |                       |             |
| H                          | -3.507642 | 1.927979  | -0.378675 |                       |             |
| H                          | -3.716155 | 1.589572  | -1.973370 |                       |             |
| H                          | -2.624267 | -0.386116 | -1.912874 |                       |             |
| C                          | -3.139555 | -0.934266 | 0.048686  |                       |             |
| O                          | -2.421547 | -1.789647 | 0.513063  |                       |             |
| O                          | -4.440832 | -0.857765 | 0.335156  |                       |             |
| H                          | -4.755159 | -0.054319 | -0.152599 |                       |             |
| H                          | -0.549169 | -0.234233 | -0.635966 |                       |             |
| H                          | -0.921008 | 1.326579  | -1.386173 |                       |             |
| S                          | -1.094233 | 1.466974  | 0.997296  |                       |             |
| H                          | -0.914267 | 0.347608  | 1.725135  |                       |             |
| C                          | 3.202238  | -0.868443 | 0.105606  |                       |             |
| C                          | 3.489779  | 0.553498  | 0.603432  |                       |             |
| N                          | 3.469287  | -1.123458 | -1.312788 |                       |             |
| H                          | 3.303817  | -0.287856 | -1.868547 |                       |             |
| H                          | 4.423875  | -1.423790 | -1.467680 |                       |             |
| H                          | 3.819320  | -1.553795 | 0.697032  |                       |             |
| C                          | 1.754502  | -1.283941 | 0.421653  |                       |             |
| O                          | 1.185278  | -1.005214 | 1.452526  |                       |             |

| Nov 11, 22 15:56           |           |           |           | dimers_structures.xyz | Page 37/325 |
|----------------------------|-----------|-----------|-----------|-----------------------|-------------|
| O                          | 1.179377  | -2.002834 | -0.543425 |                       |             |
| H                          | 1.864207  | -2.040088 | -1.261219 |                       |             |
| H                          | 3.263826  | 0.630983  | 1.665910  |                       |             |
| H                          | 4.545237  | 0.779528  | 0.451209  |                       |             |
| S                          | 2.559881  | 1.864956  | -0.304300 |                       |             |
| H                          | 1.357751  | 1.643009  | 0.278768  |                       |             |
| 28                         |           |           |           |                       |             |
| Dimer 84 of the n...n type |           |           |           |                       |             |
| C                          | 2.528236  | 0.262541  | 0.839039  |                       |             |
| C                          | 1.921754  | -1.144596 | 0.781085  |                       |             |
| N                          | 1.763928  | 1.339392  | 0.209520  |                       |             |
| H                          | 1.319050  | 1.021886  | -0.647494 |                       |             |
| H                          | 1.041555  | 1.708939  | 0.815299  |                       |             |
| H                          | 2.655899  | 0.517786  | 1.897302  |                       |             |
| C                          | 3.958432  | 0.273860  | 0.266806  |                       |             |
| O                          | 4.731438  | -0.651589 | 0.369627  |                       |             |
| O                          | 4.285786  | 1.418356  | -0.334347 |                       |             |
| H                          | 3.454068  | 1.956460  | -0.315461 |                       |             |
| H                          | 2.576010  | -1.854159 | 1.285157  |                       |             |
| H                          | 0.957460  | -1.148806 | 1.289004  |                       |             |
| S                          | 1.595094  | -1.746742 | -0.932494 |                       |             |
| H                          | 2.889517  | -1.908310 | -1.274471 |                       |             |
| C                          | -2.720304 | -0.636635 | -0.475525 |                       |             |
| C                          | -1.419151 | 0.167193  | -0.559468 |                       |             |
| N                          | -3.727907 | -0.365424 | -1.502272 |                       |             |
| H                          | -3.720101 | 0.616223  | -1.768232 |                       |             |
| H                          | -3.571958 | -0.919302 | -2.335659 |                       |             |
| H                          | -2.449971 | -1.696792 | -0.539092 |                       |             |
| C                          | -3.367235 | -0.487724 | 0.913683  |                       |             |
| O                          | -2.732890 | -0.393958 | 1.940319  |                       |             |
| O                          | -4.699771 | -0.498022 | 0.889695  |                       |             |
| H                          | -4.930550 | -0.533884 | -0.073393 |                       |             |
| H                          | -0.749526 | -0.137992 | 0.240578  |                       |             |
| H                          | -0.932076 | -0.022810 | -1.515372 |                       |             |
| S                          | -1.648432 | 1.993759  | -0.464714 |                       |             |
| H                          | -2.025010 | 2.024573  | 0.830349  |                       |             |
| 28                         |           |           |           |                       |             |
| Dimer 85 of the n...n type |           |           |           |                       |             |
| C                          | 1.969319  | -0.101051 | 0.776267  |                       |             |
| C                          | 1.904667  | 1.300973  | 0.159389  |                       |             |
| N                          | 3.001962  | -0.330509 | 1.786916  |                       |             |
| H                          | 3.845691  | 0.194312  | 1.569542  |                       |             |
| H                          | 2.688424  | -0.058380 | 2.710759  |                       |             |
| H                          | 0.998051  | -0.302152 | 1.241160  |                       |             |
| C                          | 2.088365  | -1.178217 | -0.316208 |                       |             |
| O                          | 1.549363  | -1.094097 | -1.397536 |                       |             |
| O                          | 2.812115  | -2.235181 | 0.045873  |                       |             |
| H                          | 3.158389  | -2.002891 | 0.944937  |                       |             |
| H                          | 1.093191  | 1.352140  | -0.563942 |                       |             |
| H                          | 1.725825  | 2.035261  | 0.944995  |                       |             |
| S                          | 3.465260  | 1.826242  | -0.670638 |                       |             |
| H                          | 3.380845  | 0.955247  | -1.697111 |                       |             |
| C                          | -2.374163 | 0.768743  | -0.529481 |                       |             |
| C                          | -1.695174 | -0.507644 | -1.039959 |                       |             |
| N                          | -1.671259 | 1.523863  | 0.510264  |                       |             |
| H                          | -1.174449 | 0.904873  | 1.144919  |                       |             |
| H                          | -1.016544 | 2.191643  | 0.124418  |                       |             |
| H                          | -2.506600 | 1.430926  | -1.392438 |                       |             |
| C                          | -3.808793 | 0.481068  | -0.045331 |                       |             |
| O                          | -4.539724 | -0.334361 | -0.560603 |                       |             |
| O                          | -4.190094 | 1.236636  | 0.984808  |                       |             |
| H                          | -3.382411 | 1.760914  | 1.219682  |                       |             |
| H                          | -2.310908 | -0.971183 | -1.809110 |                       |             |
| H                          | -0.719460 | -0.268977 | -1.461613 |                       |             |
| S                          | -1.342018 | -1.748588 | 0.277887  |                       |             |
| H                          | -2.625448 | -1.984882 | 0.619160  |                       |             |
| 28                         |           |           |           |                       |             |
| Dimer 86 of the n...n type |           |           |           |                       |             |
| C                          | 2.673546  | 0.757507  | 0.447680  |                       |             |

| Nov 11, 22 15:56           |           |           |           | dimers_structures.xyz | Page 38/325 |
|----------------------------|-----------|-----------|-----------|-----------------------|-------------|
| C                          | 2.295248  | -0.276991 | 1.514784  |                       |             |
| N                          | 1.573585  | 1.430808  | -0.243385 |                       |             |
| H                          | 0.806583  | 0.792228  | -0.425087 |                       |             |
| H                          | 1.219218  | 2.222530  | 0.279074  |                       |             |
| H                          | 3.273328  | 1.527811  | 0.945835  |                       |             |
| C                          | 3.623340  | 0.151272  | -0.601833 |                       |             |
| O                          | 4.455624  | -0.688391 | -0.344561 |                       |             |
| O                          | 3.468124  | 0.654952  | -1.826662 |                       |             |
| H                          | 2.698498  | 1.271922  | -1.752429 |                       |             |
| H                          | 3.192661  | -0.654503 | 2.002143  |                       |             |
| H                          | 1.663513  | 0.193436  | 2.268575  |                       |             |
| S                          | 1.325771  | -1.712334 | 0.876368  |                       |             |
| H                          | 2.313465  | -2.235497 | 0.122470  |                       |             |
| C                          | -2.053577 | -0.666097 | 0.021800  |                       |             |
| C                          | -1.711032 | 0.443314  | 1.024113  |                       |             |
| N                          | -1.346478 | -0.660659 | -1.258345 |                       |             |
| H                          | -1.227168 | 0.284262  | -1.614529 |                       |             |
| H                          | -0.439720 | -1.107074 | -1.183761 |                       |             |
| H                          | -1.831761 | -1.619503 | 0.514817  |                       |             |
| C                          | -3.568787 | -0.715942 | -0.250567 |                       |             |
| O                          | -4.410406 | -0.433588 | 0.571509  |                       |             |
| O                          | -3.879562 | -1.133926 | -1.478572 |                       |             |
| H                          | -3.008752 | -1.232781 | -1.938409 |                       |             |
| H                          | -2.338530 | 0.350033  | 1.908853  |                       |             |
| H                          | -0.671736 | 0.351832  | 1.333184  |                       |             |
| S                          | -1.866834 | 2.149118  | 0.346280  |                       |             |
| H                          | -3.205021 | 2.124969  | 0.179438  |                       |             |
| 28                         |           |           |           |                       |             |
| Dimer 87 of the n...n type |           |           |           |                       |             |
| C                          | -2.535191 | -0.759502 | 0.858359  |                       |             |
| C                          | -3.519630 | 0.415283  | 0.835321  |                       |             |
| N                          | -1.286254 | -0.567801 | 1.600504  |                       |             |
| H                          | -0.923038 | 0.368523  | 1.433831  |                       |             |
| H                          | -1.431135 | -0.677107 | 2.597530  |                       |             |
| H                          | -3.061104 | -1.606977 | 1.314861  |                       |             |
| C                          | -2.201292 | -1.258259 | -0.557238 |                       |             |
| O                          | -2.923894 | -1.121680 | -1.515740 |                       |             |
| O                          | -1.038924 | -1.918453 | -0.630734 |                       |             |
| H                          | -0.626749 | -1.805539 | 0.256451  |                       |             |
| H                          | -4.410640 | 0.138620  | 0.273219  |                       |             |
| H                          | -3.812396 | 0.655452  | 1.857777  |                       |             |
| S                          | -2.832776 | 1.979810  | 0.146805  |                       |             |
| H                          | -2.619556 | 1.511541  | -1.099280 |                       |             |
| C                          | 2.722696  | -0.810824 | -0.111770 |                       |             |
| C                          | 1.839723  | -0.512407 | -1.329064 |                       |             |
| N                          | 2.040498  | -1.253057 | 1.106244  |                       |             |
| H                          | 1.137976  | -0.800434 | 1.225030  |                       |             |
| H                          | 1.903596  | -2.256049 | 1.123476  |                       |             |
| H                          | 3.424486  | -1.599321 | -0.406671 |                       |             |
| C                          | 3.621771  | 0.391627  | 0.230998  |                       |             |
| O                          | 4.107156  | 1.124812  | -0.600853 |                       |             |
| O                          | 3.844066  | 0.541337  | 1.537041  |                       |             |
| H                          | 3.289452  | -0.160793 | 1.963859  |                       |             |
| H                          | 2.460461  | -0.259583 | -2.187239 |                       |             |
| H                          | 1.243043  | -1.391499 | -1.569444 |                       |             |
| S                          | 0.615017  | 0.838447  | -1.054638 |                       |             |
| H                          | 1.511789  | 1.843400  | -0.985349 |                       |             |
| 28                         |           |           |           |                       |             |
| Dimer 88 of the n...n type |           |           |           |                       |             |
| C                          | 3.139650  | 0.045431  | -0.755270 |                       |             |
| C                          | 3.179622  | 1.227052  | 0.236259  |                       |             |
| N                          | 2.256319  | 0.306643  | -1.873802 |                       |             |
| H                          | 1.283675  | 0.348581  | -1.579279 |                       |             |
| H                          | 2.322887  | -0.439609 | -2.558372 |                       |             |
| H                          | 4.162381  | -0.066925 | -1.129026 |                       |             |
| C                          | 2.823961  | -1.237731 | 0.014182  |                       |             |
| O                          | 1.748085  | -1.805387 | 0.017330  |                       |             |
| O                          | 3.871078  | -1.669610 | 0.722447  |                       |             |
| H                          | 3.616823  | -2.456965 | 1.231753  |                       |             |

| Nov 11, 22 15:56           |           |           |           | dimers_structures.xyz | Page 39/325 |
|----------------------------|-----------|-----------|-----------|-----------------------|-------------|
| H                          | 3.901977  | 1.032331  | 1.028241  |                       |             |
| H                          | 3.491773  | 2.116490  | -0.311013 |                       |             |
| S                          | 1.559506  | 1.685766  | 0.990718  |                       |             |
| H                          | 1.397611  | 0.580495  | 1.745293  |                       |             |
| C                          | -2.359576 | 0.907220  | 0.336324  |                       |             |
| C                          | -3.372258 | -0.003240 | 1.044870  |                       |             |
| N                          | -3.015992 | 1.823030  | -0.584359 |                       |             |
| H                          | -3.484268 | 1.290166  | -1.313358 |                       |             |
| H                          | -2.319438 | 2.391623  | -1.056249 |                       |             |
| H                          | -1.868032 | 1.496997  | 1.120845  |                       |             |
| C                          | -1.228522 | 0.094823  | -0.301999 |                       |             |
| O                          | -0.822194 | 0.272885  | -1.431089 |                       |             |
| O                          | -0.723909 | -0.810539 | 0.537670  |                       |             |
| H                          | 0.096235  | -1.208071 | 0.163750  |                       |             |
| H                          | -2.891724 | -0.562681 | 1.844446  |                       |             |
| H                          | -4.163118 | 0.613887  | 1.470660  |                       |             |
| S                          | -4.230667 | -1.194319 | -0.077837 |                       |             |
| H                          | -3.172242 | -2.007313 | -0.273743 |                       |             |
| 28                         |           |           |           |                       |             |
| Dimer 89 of the n...n type |           |           |           |                       |             |
| C                          | -2.665482 | 0.022507  | 0.849421  |                       |             |
| C                          | -1.614620 | 0.750579  | 0.004159  |                       |             |
| N                          | -2.387749 | -1.375322 | 1.183566  |                       |             |
| H                          | -1.943748 | -1.855051 | 0.404485  |                       |             |
| H                          | -1.780888 | -1.454239 | 1.990646  |                       |             |
| H                          | -2.763415 | 0.577045  | 1.789762  |                       |             |
| C                          | -4.060283 | 0.113749  | 0.204628  |                       |             |
| O                          | -4.445323 | 1.070474  | -0.428390 |                       |             |
| O                          | -4.827529 | -0.953583 | 0.429678  |                       |             |
| H                          | -4.242320 | -1.585985 | 0.917039  |                       |             |
| H                          | -1.900750 | 1.790467  | -0.143909 |                       |             |
| H                          | -0.661258 | 0.723876  | 0.529987  |                       |             |
| S                          | -1.303815 | -0.025845 | -1.638826 |                       |             |
| H                          | -2.506774 | 0.268365  | -2.172396 |                       |             |
| C                          | 2.456735  | -0.377587 | -0.684449 |                       |             |
| C                          | 2.112613  | 1.115275  | -0.608851 |                       |             |
| N                          | 1.535851  | -1.310500 | -0.032862 |                       |             |
| H                          | 1.132778  | -0.912579 | 0.810659  |                       |             |
| H                          | 0.788756  | -1.608389 | -0.647001 |                       |             |
| H                          | 2.506275  | -0.642993 | -1.746403 |                       |             |
| C                          | 3.881109  | -0.638993 | -0.155618 |                       |             |
| O                          | 4.803773  | 0.129659  | -0.305755 |                       |             |
| O                          | 4.016333  | -1.810649 | 0.465135  |                       |             |
| H                          | 3.100072  | -2.188852 | 0.480933  |                       |             |
| H                          | 2.877977  | 1.695239  | -1.121924 |                       |             |
| H                          | 1.156412  | 1.298211  | -1.097380 |                       |             |
| S                          | 1.925568  | 1.757414  | 1.109822  |                       |             |
| H                          | 3.213674  | 1.590133  | 1.473554  |                       |             |
| 28                         |           |           |           |                       |             |
| Dimer 90 of the n...n type |           |           |           |                       |             |
| C                          | 2.916450  | -0.063243 | 0.957015  |                       |             |
| C                          | 3.194033  | -1.259249 | 0.040953  |                       |             |
| N                          | 1.878481  | -0.244543 | 1.976068  |                       |             |
| H                          | 1.150267  | -0.872579 | 1.647290  |                       |             |
| H                          | 2.258526  | -0.633544 | 2.830601  |                       |             |
| H                          | 3.854090  | 0.172863  | 1.473188  |                       |             |
| C                          | 2.604913  | 1.209970  | 0.148434  |                       |             |
| O                          | 3.088712  | 1.455730  | -0.932773 |                       |             |
| O                          | 1.767372  | 2.044003  | 0.766534  |                       |             |
| H                          | 1.482080  | 1.554447  | 1.578732  |                       |             |
| H                          | 4.012675  | -1.029379 | -0.638912 |                       |             |
| H                          | 3.472258  | -2.120684 | 0.648146  |                       |             |
| S                          | 1.734526  | -1.805655 | -0.948621 |                       |             |
| H                          | 1.699370  | -0.736602 | -1.770277 |                       |             |
| C                          | -1.904719 | -0.522201 | 0.467363  |                       |             |
| C                          | -1.034543 | 0.660163  | 0.030210  |                       |             |
| N                          | -1.889343 | -1.699007 | -0.404959 |                       |             |
| H                          | -1.842085 | -1.415220 | -1.381214 |                       |             |
| H                          | -1.078251 | -2.276876 | -0.218165 |                       |             |

| Nov 11, 22 15:56           |           |           |           | dimers_structures.xyz | Page 40/325 |
|----------------------------|-----------|-----------|-----------|-----------------------|-------------|
| H                          | -1.554406 | -0.836129 | 1.457913  |                       |             |
| C                          | -3.362934 | -0.091743 | 0.699777  |                       |             |
| O                          | -3.681397 | 0.989197  | 1.141171  |                       |             |
| O                          | -4.255752 | -1.034322 | 0.394702  |                       |             |
| H                          | -3.717003 | -1.775034 | 0.016938  |                       |             |
| H                          | -1.066027 | 1.455062  | 0.772753  |                       |             |
| H                          | -0.010083 | 0.317081  | -0.075282 |                       |             |
| S                          | -1.469360 | 1.349001  | -1.620455 |                       |             |
| H                          | -2.658725 | 1.868856  | -1.253831 |                       |             |
| 28                         |           |           |           |                       |             |
| Dimer 91 of the n...n type |           |           |           |                       |             |
| C                          | -2.202537 | -0.516114 | -0.618800 |                       |             |
| C                          | -3.706907 | -0.420709 | -0.930728 |                       |             |
| N                          | -1.916978 | -1.609313 | 0.289185  |                       |             |
| H                          | -2.253835 | -1.395736 | 1.223165  |                       |             |
| H                          | -0.917418 | -1.760979 | 0.346065  |                       |             |
| H                          | -1.689853 | -0.710580 | -1.566187 |                       |             |
| C                          | -1.677557 | 0.841165  | -0.147094 |                       |             |
| O                          | -1.090149 | 1.039402  | 0.899286  |                       |             |
| O                          | -1.957584 | 1.820509  | -1.011679 |                       |             |
| H                          | -1.601951 | 2.659458  | -0.675322 |                       |             |
| H                          | -3.895364 | 0.311791  | -1.713204 |                       |             |
| H                          | -4.048238 | -1.397977 | -1.270267 |                       |             |
| S                          | -4.760903 | -0.016705 | 0.531770  |                       |             |
| H                          | -4.424839 | 1.287229  | 0.614493  |                       |             |
| C                          | 3.084286  | -1.150903 | 0.238057  |                       |             |
| C                          | 3.984630  | -0.022874 | 0.768532  |                       |             |
| N                          | 3.550111  | -1.642752 | -1.048869 |                       |             |
| H                          | 3.485414  | -0.897938 | -1.738478 |                       |             |
| H                          | 2.939241  | -2.384263 | -1.377507 |                       |             |
| H                          | 3.146432  | -1.966115 | 0.968708  |                       |             |
| C                          | 1.619228  | -0.701301 | 0.234468  |                       |             |
| O                          | 0.898747  | -0.734274 | -0.741977 |                       |             |
| O                          | 1.221734  | -0.266136 | 1.434345  |                       |             |
| H                          | 0.308230  | 0.100551  | 1.364191  |                       |             |
| H                          | 3.720685  | 0.225833  | 1.794226  |                       |             |
| H                          | 5.021272  | -0.357923 | 0.739569  |                       |             |
| S                          | 3.941387  | 1.522228  | -0.245279 |                       |             |
| H                          | 2.701700  | 1.911123  | 0.118074  |                       |             |
| 28                         |           |           |           |                       |             |
| Dimer 92 of the n...n type |           |           |           |                       |             |
| C                          | 2.764253  | 0.271164  | 0.940336  |                       |             |
| C                          | 1.451737  | 0.417180  | 0.163517  |                       |             |
| N                          | 3.585502  | 1.476980  | 1.068176  |                       |             |
| H                          | 3.512692  | 2.054966  | 0.234393  |                       |             |
| H                          | 3.309894  | 2.036418  | 1.866143  |                       |             |
| H                          | 2.507775  | -0.071859 | 1.949150  |                       |             |
| C                          | 3.629124  | -0.862234 | 0.358305  |                       |             |
| O                          | 3.172773  | -1.886001 | -0.098468 |                       |             |
| O                          | 4.939223  | -0.625923 | 0.425335  |                       |             |
| H                          | 5.006795  | 0.293365  | 0.790133  |                       |             |
| H                          | 0.910109  | -0.526782 | 0.165088  |                       |             |
| H                          | 0.838021  | 1.182351  | 0.636381  |                       |             |
| S                          | 1.667015  | 0.972843  | -1.580698 |                       |             |
| H                          | 2.266035  | -0.154470 | -2.016078 |                       |             |
| C                          | -2.101164 | 0.260783  | 0.562202  |                       |             |
| C                          | -3.468109 | 0.305880  | 1.256941  |                       |             |
| N                          | -1.789678 | 1.365505  | -0.343746 |                       |             |
| H                          | -2.618486 | 1.649632  | -0.860547 |                       |             |
| H                          | -1.444611 | 2.175212  | 0.157517  |                       |             |
| H                          | -1.339381 | 0.245606  | 1.349811  |                       |             |
| C                          | -1.903452 | -1.070548 | -0.184266 |                       |             |
| O                          | -2.334382 | -2.129220 | 0.213422  |                       |             |
| O                          | -1.181596 | -0.969880 | -1.300786 |                       |             |
| H                          | -0.984711 | -0.006656 | -1.409831 |                       |             |
| H                          | -3.570451 | -0.534304 | 1.941970  |                       |             |
| H                          | -3.552332 | 1.234009  | 1.822467  |                       |             |
| S                          | -4.896591 | 0.305162  | 0.088939  |                       |             |
| H                          | -4.741377 | -0.968122 | -0.327697 |                       |             |

| Nov 11, 22 15:56           | dimers_structures.xyz | Page 41/325 |
|----------------------------|-----------------------|-------------|
| 28                         |                       |             |
| Dimer 93 of the n...n type |                       |             |
| C -2.726720                | -0.511310             | 0.688968    |
| C -1.955138                | 0.772893              | 1.015515    |
| N -2.027179                | -1.506120             | -0.125252   |
| H -1.424452                | -1.056751             | -0.810043   |
| H -1.455934                | -2.124207             | 0.437900    |
| H -2.994633                | -0.982035             | 1.641607    |
| C -4.078790                | -0.188737             | 0.025181    |
| O -4.754405                | 0.773656              | 0.312331    |
| O -4.457040                | -1.085761             | -0.885407   |
| H -3.695160                | -1.717315             | -0.942364   |
| H -2.560552                | 1.424976              | 1.642973    |
| H -1.042641                | 0.522326              | 1.554940    |
| S -1.411349                | 1.712922              | -0.474310   |
| H -2.641740                | 2.115808              | -0.851759   |
| C 2.726591                 | 0.511335              | 0.688856    |
| C 1.954996                 | -0.772843             | 1.015416    |
| N 2.027067                 | 1.506053              | -0.125540   |
| H 1.424552                 | 1.056497              | -0.810398   |
| H 1.455540                 | 2.123994              | 0.437482    |
| H 2.994306                 | 0.982171              | 1.641497    |
| C 4.078756                 | 0.188846              | 0.025250    |
| O 4.754359                 | -0.773552             | 0.312464    |
| O 4.457099                 | 1.085925              | -0.885211   |
| H 3.695122                 | 1.717423              | -0.942190   |
| H 2.560268                 | -1.424805             | 1.643146    |
| H 1.042440                 | -0.522089             | 1.554671    |
| S 1.411556                 | -1.713099             | -0.474374   |
| H 2.642060                 | -2.115940             | -0.851505   |
| 28                         |                       |             |
| Dimer 94 of the n...n type |                       |             |
| C -2.659150                | -1.023362             | 0.562543    |
| C -3.532048                | 0.232359              | 0.649624    |
| N -1.539361                | -1.110222             | 1.506038    |
| H -1.167699                | -0.184643             | 1.703017    |
| H -1.826338                | -1.519635             | 2.387197    |
| H -3.312291                | -1.885838             | 0.739017    |
| C -2.124365                | -1.246046             | -0.863284   |
| O -2.706862                | -0.903579             | -1.865836   |
| O -0.957023                | -1.894285             | -0.899584   |
| H -0.689675                | -1.977548             | 0.048192    |
| H -4.348531                | 0.169553              | -0.067957   |
| H -3.951242                | 0.310517              | 1.652755    |
| S -2.613650                | 1.808428              | 0.373543    |
| H -2.373399                | 1.607833              | -0.938202   |
| C 1.801445                 | -0.153493             | 0.692431    |
| C 0.992221                 | 0.677359              | -0.309115   |
| N 2.385208                 | 0.573692              | 1.822510    |
| H 2.663412                 | 1.511623              | 1.544056    |
| H 1.733561                 | 0.653939              | 2.593759    |
| H 1.132282                 | -0.918518             | 1.101272    |
| C 2.909738                 | -0.952014             | -0.015659   |
| O 2.783532                 | -1.443224             | -1.114543   |
| O 4.023405                 | -1.081421             | 0.706214    |
| H 3.852206                 | -0.545434             | 1.522328    |
| H 0.575998                 | 0.034477              | -1.081006   |
| H 0.172541                 | 1.174424              | 0.208358    |
| S 1.951475                 | 2.032983              | -1.108967   |
| H 2.741566                 | 1.233650              | -1.855071   |
| 28                         |                       |             |
| Dimer 95 of the n...n type |                       |             |
| C 2.544624                 | 0.503242              | 0.834202    |
| C 1.971706                 | -0.872164             | 1.196956    |
| N 1.661782                 | 1.413696              | 0.105660    |
| H 1.140464                 | 0.910356              | -0.608096   |
| H 0.994741                 | 1.865376              | 0.720417    |
| H 2.829982                 | 0.993401              | 1.772163    |
| C 3.865655                 | 0.369878              | 0.055377    |

| Nov 11, 22 15:56           | dimers_structures.xyz | Page 42/325 |
|----------------------------|-----------------------|-------------|
| O 4.657920                 | -0.528751             | 0.223903    |
| O 4.081381                 | 1.360161              | -0.812626   |
| H 3.259804                 | 1.909551              | -0.782392   |
| H 2.720249                 | -1.463834             | 1.721587    |
| H 1.112285                 | -0.742954             | 1.855318    |
| S 1.354347                 | -1.827223             | -0.255390   |
| H 2.560524                 | -2.021669             | -0.826256   |
| C -1.849642                | -0.003886             | 0.468671    |
| C -3.148104                | -0.711009             | 0.874102    |
| N -1.659960                | 1.356713              | 0.978953    |
| H -2.549490                | 1.848410              | 1.029689    |
| H -1.257078                | 1.350626              | 1.908675    |
| H -1.023802                | -0.621494             | 0.833503    |
| C -1.676228                | 0.003725              | -1.060336   |
| O -1.987117                | -0.920271             | -1.773733   |
| O -1.125321                | 1.125564              | -1.534689   |
| H -1.055997                | 1.720750              | -0.746238   |
| H -3.157393                | -1.727249             | 0.483094    |
| H -3.210424                | -0.751254             | 1.961624    |
| S -4.674541                | 0.164112              | 0.320599    |
| H -4.516471                | -0.085438             | -0.995402   |
| 28                         |                       |             |
| Dimer 96 of the n...n type |                       |             |
| C -3.216806                | 0.391601              | 0.458738    |
| C -2.940295                | -1.083130             | 0.809593    |
| N -4.144838                | 0.501004              | -0.656351   |
| H -3.710744                | 0.116559              | -1.491822   |
| H -4.332811                | 1.478252              | -0.858098   |
| H -3.674388                | 0.844342              | 1.344908    |
| C -1.889999                | 1.117774              | 0.229158    |
| O -1.518557                | 1.541218              | -0.843572   |
| O -1.168147                | 1.211945              | 1.355862    |
| H -0.295803                | 1.610197              | 1.138559    |
| H -2.330411                | -1.147608             | 1.710010    |
| H -3.894233                | -1.576701             | 0.993961    |
| S -2.105854                | -2.042510             | -0.531890   |
| H -0.842305                | -1.603693             | -0.234863   |
| C 1.912501                 | -0.789500             | -0.399760   |
| C 1.617942                 | 0.543614              | -1.108775   |
| N 0.906251                 | -1.113661             | 0.597012    |
| H 0.879047                 | -0.410903             | 1.329329    |
| H 1.132271                 | -1.992639             | 1.052925    |
| H 1.884024                 | -1.556966             | -1.180656   |
| C 3.340621                 | -0.784656             | 0.152629    |
| O 3.623614                 | -0.821455             | 1.326639    |
| O 4.248672                 | -0.708602             | -0.836081   |
| H 5.139586                 | -0.680068             | -0.451506   |
| H 2.325272                 | 0.691588              | -1.922409   |
| H 0.604399                 | 0.520418              | -1.507106   |
| S 1.639485                 | 2.043546              | -0.028535   |
| H 2.819662                 | 1.820170              | 0.586652    |
| 28                         |                       |             |
| Dimer 97 of the n...n type |                       |             |
| C 2.039467                 | -0.286786             | 0.624632    |
| C 1.514795                 | 0.596425              | -0.512439   |
| N 2.300174                 | 0.382409              | 1.900435    |
| H 2.638093                 | 1.330032              | 1.751579    |
| H 1.469080                 | 0.429036              | 2.477436    |
| H 1.289184                 | -1.065670             | 0.798630    |
| C 3.299408                 | -1.056829             | 0.194187    |
| O 3.471948                 | -1.487303             | -0.923920   |
| O 4.181545                 | -1.235828             | 1.177661    |
| H 3.799649                 | -0.739419             | 1.945814    |
| H 1.305975                 | -0.009351             | -1.392970   |
| H 0.594527                 | 1.080926              | -0.190117   |
| S 2.646876                 | 1.971936              | -0.985224   |
| H 3.605581                 | 1.190018              | -1.522334   |
| C -2.804434                | 0.814388              | -0.238718   |
| C -2.033587                | 0.038783              | -1.313896   |

| Nov 11, 22 15:56           |           |           | dimers_structures.xyz | Page 43/325 |
|----------------------------|-----------|-----------|-----------------------|-------------|
| N                          | -2.045728 | 1.253840  | 0.933098              |             |
| H                          | -1.366986 | 0.552125  | 1.215832              |             |
| H                          | -1.564789 | 2.130099  | 0.771883              |             |
| H                          | -3.222031 | 1.706201  | -0.719621             |             |
| C                          | -4.038141 | 0.024525  | 0.237612              |             |
| O                          | -4.690567 | -0.697534 | -0.481375             |             |
| O                          | -4.347724 | 0.229582  | 1.518519              |             |
| H                          | -3.624142 | 0.810171  | 1.863040              |             |
| H                          | -2.699667 | -0.221982 | -2.134655             |             |
| H                          | -1.228849 | 0.660377  | -1.704979             |             |
| S                          | -1.222036 | -1.496011 | -0.691257             |             |
| H                          | -2.360877 | -2.175452 | -0.445928             |             |
| 28                         |           |           |                       |             |
| Dimer 98 of the n...n type |           |           |                       |             |
| C                          | 2.203107  | 0.287475  | -1.091420             |             |
| C                          | 3.049812  | 1.351623  | -0.372002             |             |
| N                          | 0.790077  | 0.616847  | -1.050650             |             |
| H                          | 0.460333  | 0.585369  | -0.089295             |             |
| H                          | 0.255175  | -0.060439 | -1.583300             |             |
| H                          | 2.536110  | 0.276556  | -2.135761             |             |
| C                          | 2.519672  | -1.109431 | -0.546060             |             |
| O                          | 1.693599  | -1.900678 | -0.133025             |             |
| O                          | 3.826694  | -1.378623 | -0.569682             |             |
| H                          | 3.982308  | -2.272465 | -0.222281             |             |
| H                          | 4.111057  | 1.163556  | -0.520911             |             |
| H                          | 2.801478  | 2.326640  | -0.790020             |             |
| S                          | 2.712989  | 1.493408  | 1.437545              |             |
| H                          | 3.336674  | 0.354758  | 1.804201              |             |
| C                          | -3.111727 | -0.860134 | 0.411089              |             |
| C                          | -3.367849 | -0.151774 | -0.935021             |             |
| N                          | -3.831964 | -0.212548 | 1.495186              |             |
| H                          | -3.449239 | 0.716691  | 1.648941              |             |
| H                          | -3.695856 | -0.726584 | 2.360097              |             |
| H                          | -3.489777 | -1.880895 | 0.294508              |             |
| C                          | -1.603098 | -0.969995 | 0.640356              |             |
| O                          | -0.990370 | -0.316637 | 1.459880              |             |
| O                          | -1.029545 | -1.829623 | -0.205286             |             |
| H                          | -0.046987 | -1.832869 | -0.087888             |             |
| H                          | -2.867499 | -0.681860 | -1.744309             |             |
| H                          | -4.441106 | -0.154112 | -1.125251             |             |
| S                          | -2.887389 | 1.631964  | -0.993696             |             |
| H                          | -1.551573 | 1.467504  | -1.078805             |             |
| 28                         |           |           |                       |             |
| Dimer 99 of the n...n type |           |           |                       |             |
| C                          | 2.043172  | -0.039342 | 0.887842              |             |
| C                          | 3.580748  | 0.025222  | 0.939549              |             |
| N                          | 1.557148  | -1.404079 | 0.960815              |             |
| H                          | 1.807536  | -1.912361 | 0.117687              |             |
| H                          | 0.544792  | -1.397689 | 1.031251              |             |
| H                          | 1.674828  | 0.506288  | 1.761653              |             |
| C                          | 1.541613  | 0.736849  | -0.331601             |             |
| O                          | 0.988583  | 0.247502  | -1.290695             |             |
| O                          | 1.798062  | 2.051842  | -0.222185             |             |
| H                          | 1.480162  | 2.505814  | -1.019405             |             |
| H                          | 3.918673  | 1.059413  | 0.983864              |             |
| H                          | 3.917404  | -0.495095 | 1.836007              |             |
| S                          | 4.435185  | -0.827516 | -0.458163             |             |
| H                          | 4.108061  | 0.061592  | -1.418426             |             |
| C                          | -2.043726 | -0.037851 | -0.888131             |             |
| C                          | -3.581343 | 0.027219  | -0.938738             |             |
| N                          | -1.558057 | -1.402544 | -0.963173             |             |
| H                          | -1.807883 | -1.911929 | -0.120556             |             |
| H                          | -0.545765 | -1.396134 | -1.034401             |             |
| H                          | -1.675816 | 0.508892  | -1.761405             |             |
| C                          | -1.541359 | 0.736615  | 0.332122              |             |
| O                          | -0.989704 | 0.245647  | 1.291191              |             |
| O                          | -1.795492 | 2.052115  | 0.223536              |             |
| H                          | -1.477266 | 2.504928  | 1.021288              |             |
| H                          | -3.918925 | 1.061614  | -0.981022             |             |

| Nov 11, 22 15:56            |           |           | dimers_structures.xyz | Page 44/325 |
|-----------------------------|-----------|-----------|-----------------------|-------------|
| H                           | -3.918647 | -0.491391 | -1.835945             |             |
| S                           | -4.435175 | -0.827859 | 0.457867              |             |
| H                           | -4.107166 | 0.059298  | 1.419630              |             |
| 28                          |           |           |                       |             |
| Dimer 100 of the n...n type |           |           |                       |             |
| C                           | 2.607758  | -1.008033 | 0.628522              |             |
| C                           | 2.716637  | 0.496683  | 0.953577              |             |
| N                           | 3.773953  | -1.491156 | -0.098002             |             |
| H                           | 3.810851  | -1.060902 | -1.017890             |             |
| H                           | 3.706389  | -2.494204 | -0.240732             |             |
| H                           | 2.555693  | -1.527398 | 1.588709              |             |
| C                           | 1.279001  | -1.244208 | -0.091457             |             |
| O                           | 1.123104  | -1.086400 | -1.286805             |             |
| O                           | 0.304425  | -1.598082 | 0.746941              |             |
| H                           | -0.561425 | -1.653559 | 0.268024              |             |
| H                           | 1.801214  | 0.840347  | 1.437330              |             |
| H                           | 3.552825  | 0.646737  | 1.637248              |             |
| S                           | 3.092428  | 1.600592  | -0.478201             |             |
| H                           | 2.053436  | 1.231929  | -1.253281             |             |
| C                           | -2.987533 | 0.315602  | 0.737195              |             |
| C                           | -2.499465 | 1.661140  | 0.161641              |             |
| N                           | -2.268746 | -0.041323 | 1.943714              |             |
| H                           | -1.268818 | -0.089572 | 1.775797              |             |
| H                           | -2.567042 | -0.944391 | 2.296221              |             |
| H                           | -4.046150 | 0.451774  | 0.979519              |             |
| C                           | -2.939125 | -0.732310 | -0.376331             |             |
| O                           | -2.093518 | -1.601253 | -0.486260             |             |
| O                           | -3.926548 | -0.572714 | -1.258547             |             |
| H                           | -3.833234 | -1.223034 | -1.974448             |             |
| H                           | -3.074419 | 1.921591  | -0.725972             |             |
| H                           | -2.650321 | 2.432775  | 0.916608              |             |
| S                           | -0.697074 | 1.735147  | -0.225130             |             |
| H                           | -0.664446 | 0.757770  | -1.155314             |             |
| 28                          |           |           |                       |             |
| Dimer 101 of the n...n type |           |           |                       |             |
| C                           | 3.057171  | -0.899698 | 0.035075              |             |
| C                           | 3.251018  | 0.395948  | 0.841032              |             |
| N                           | 3.658927  | -0.793219 | -1.285209             |             |
| H                           | 3.157484  | -0.095589 | -1.829875             |             |
| H                           | 3.551540  | -1.669602 | -1.786506             |             |
| H                           | 3.577739  | -1.687184 | 0.593349              |             |
| C                           | 1.584232  | -1.318952 | 0.003174              |             |
| O                           | 0.962244  | -1.558037 | -1.007617             |             |
| O                           | 1.050610  | -1.382473 | 1.232549              |             |
| H                           | 0.101056  | -1.616231 | 1.171895              |             |
| H                           | 2.910241  | 0.268430  | 1.866092              |             |
| H                           | 4.313649  | 0.636347  | 0.850989              |             |
| S                           | 2.411252  | 1.882578  | 0.124043              |             |
| H                           | 1.230466  | 1.740205  | 0.754790              |             |
| C                           | -2.063102 | -0.383525 | -0.856000             |             |
| C                           | -1.116833 | 0.760166  | -0.453456             |             |
| N                           | -3.023980 | 0.044883  | -1.855284             |             |
| H                           | -3.652827 | 0.737826  | -1.458565             |             |
| H                           | -3.599010 | -0.737496 | -2.150735             |             |
| H                           | -1.418569 | -1.159261 | -1.280324             |             |
| C                           | -2.701483 | -0.992837 | 0.392771              |             |
| O                           | -3.873661 | -0.970510 | 0.666339              |             |
| O                           | -1.773626 | -1.577829 | 1.199361              |             |
| H                           | -2.210322 | -1.934779 | 1.990041              |             |
| H                           | -0.375300 | 0.401022  | 0.249342              |             |
| H                           | -0.598042 | 1.114629  | -1.342779             |             |
| S                           | -1.921741 | 2.248323  | 0.275797              |             |
| H                           | -2.255457 | 1.689795  | 1.457663              |             |
| 28                          |           |           |                       |             |
| Dimer 102 of the n...n type |           |           |                       |             |
| C                           | 2.583299  | 0.027583  | -0.808485             |             |
| C                           | 2.978850  | 0.656193  | 0.535942              |             |
| N                           | 2.070603  | 1.027902  | -1.731858             |             |
| H                           | 1.272860  | 1.497189  | -1.310111             |             |

| Nov 11, 22 15:56            |           |           |           | dimers_structures.xyz | Page 45/325 |
|-----------------------------|-----------|-----------|-----------|-----------------------|-------------|
| H                           | 1.731542  | 0.582615  | -2.578898 |                       |             |
| H                           | 3.501045  | -0.402258 | -1.231247 |                       |             |
| C                           | 1.641613  | -1.169218 | -0.616663 |                       |             |
| O                           | 0.692300  | -1.412239 | -1.329949 |                       |             |
| O                           | 1.994291  | -1.933352 | 0.425538  |                       |             |
| H                           | 1.295707  | -2.589301 | 0.585263  |                       |             |
| H                           | 3.496919  | -0.069785 | 1.158189  |                       |             |
| H                           | 3.645190  | 1.497520  | 0.346634  |                       |             |
| S                           | 1.566148  | 1.360222  | 1.496775  |                       |             |
| H                           | 0.918567  | 0.196304  | 1.713969  |                       |             |
| C                           | -2.583416 | 0.028112  | 0.808394  |                       |             |
| C                           | -2.978665 | 0.656382  | -0.536252 |                       |             |
| N                           | -2.070646 | 1.028587  | 1.731566  |                       |             |
| H                           | -1.272680 | 1.497499  | 1.309812  |                       |             |
| H                           | -1.731868 | 0.583452  | 2.578803  |                       |             |
| H                           | -3.501291 | -0.401464 | 1.231145  |                       |             |
| C                           | -1.641861 | -1.168840 | 0.617016  |                       |             |
| O                           | -0.692416 | -1.411626 | 1.330154  |                       |             |
| O                           | -1.994878 | -1.933455 | -0.424798 |                       |             |
| H                           | -1.296372 | -2.589531 | -0.584328 |                       |             |
| H                           | -3.496710 | -0.069706 | -1.158397 |                       |             |
| H                           | -3.644937 | 1.497847  | -0.347341 |                       |             |
| S                           | -1.565673 | 1.359938  | -1.497060 |                       |             |
| H                           | -0.918578 | 0.195741  | -1.714160 |                       |             |
| 28                          |           |           |           |                       |             |
| Dimer 103 of the n...n type |           |           |           |                       |             |
| C                           | 3.106829  | 0.861876  | -0.227892 |                       |             |
| C                           | 3.428445  | -0.639677 | -0.304517 |                       |             |
| N                           | 3.360646  | 1.391730  | 1.102911  |                       |             |
| H                           | 2.738644  | 0.939487  | 1.768899  |                       |             |
| H                           | 3.132041  | 2.380580  | 1.131454  |                       |             |
| H                           | 3.776700  | 1.361320  | -0.938281 |                       |             |
| C                           | 1.682569  | 1.131145  | -0.728464 |                       |             |
| O                           | 0.861579  | 1.787180  | -0.128548 |                       |             |
| O                           | 1.444203  | 0.540818  | -1.908663 |                       |             |
| H                           | 0.492807  | 0.591606  | -2.098846 |                       |             |
| H                           | 3.406103  | -0.982342 | -1.336614 |                       |             |
| H                           | 4.425214  | -0.806118 | 0.102998  |                       |             |
| S                           | 2.297487  | -1.711430 | 0.691491  |                       |             |
| H                           | 1.212812  | -1.559537 | -0.098262 |                       |             |
| C                           | -2.097251 | -0.707563 | 0.986380  |                       |             |
| C                           | -3.360965 | 0.172450  | 0.930291  |                       |             |
| N                           | -0.984929 | -0.001794 | 1.592284  |                       |             |
| H                           | -0.657339 | 0.736019  | 0.974451  |                       |             |
| H                           | -0.195861 | -0.625312 | 1.726182  |                       |             |
| H                           | -2.353125 | -1.573075 | 1.607992  |                       |             |
| C                           | -1.798086 | -1.262960 | -0.410062 |                       |             |
| O                           | -0.781529 | -1.059210 | -1.036308 |                       |             |
| O                           | -2.816863 | -1.999484 | -0.882670 |                       |             |
| H                           | -2.594431 | -2.318653 | -1.772277 |                       |             |
| H                           | -4.218078 | -0.406707 | 0.591464  |                       |             |
| H                           | -3.561478 | 0.548490  | 1.933178  |                       |             |
| S                           | -3.199744 | 1.677373  | -0.126875 |                       |             |
| H                           | -3.226293 | 1.043545  | -1.317471 |                       |             |
| 28                          |           |           |           |                       |             |
| Dimer 104 of the n...n type |           |           |           |                       |             |
| C                           | -1.654586 | -0.585819 | -0.260549 |                       |             |
| C                           | -1.178318 | 0.401729  | 0.815176  |                       |             |
| N                           | -1.173970 | -0.207295 | -1.580054 |                       |             |
| H                           | -1.520311 | 0.717500  | -1.821502 |                       |             |
| H                           | -1.539369 | -0.844350 | -2.281211 |                       |             |
| H                           | -1.207884 | -1.549312 | 0.008128  |                       |             |
| C                           | -3.171378 | -0.772187 | -0.194425 |                       |             |
| O                           | -3.932554 | -0.599728 | -1.117438 |                       |             |
| O                           | -3.570489 | -1.160052 | 1.033026  |                       |             |
| H                           | -4.534890 | -1.268617 | 1.032817  |                       |             |
| H                           | -1.464482 | 0.054311  | 1.805377  |                       |             |
| H                           | -0.096472 | 0.463365  | 0.762890  |                       |             |
| S                           | -1.760504 | 2.136785  | 0.586720  |                       |             |

| Nov 11, 22 15:56            |           |           |           | dimers_structures.xyz | Page 46/325 |
|-----------------------------|-----------|-----------|-----------|-----------------------|-------------|
| H                           | -3.050596 | 1.923888  | 0.919882  |                       |             |
| C                           | 2.701443  | -0.937309 | -0.608401 |                       |             |
| C                           | 3.304100  | 0.473344  | -0.690072 |                       |             |
| N                           | 1.751254  | -1.180616 | -1.678148 |                       |             |
| H                           | 0.897498  | -0.628246 | -1.554247 |                       |             |
| H                           | 1.451536  | -2.150409 | -1.654232 |                       |             |
| H                           | 3.544843  | -1.631423 | -0.722787 |                       |             |
| C                           | 2.141049  | -1.235481 | 0.788448  |                       |             |
| O                           | 1.081204  | -1.775378 | 1.003730  |                       |             |
| O                           | 2.979239  | -0.840173 | 1.767330  |                       |             |
| H                           | 2.592222  | -1.072787 | 2.626644  |                       |             |
| H                           | 4.147724  | 0.574608  | -0.010413 |                       |             |
| H                           | 3.652455  | 0.638227  | -1.709242 |                       |             |
| S                           | 2.114223  | 1.845174  | -0.348158 |                       |             |
| H                           | 2.114183  | 1.714266  | 0.994078  |                       |             |
| 28                          |           |           |           |                       |             |
| Dimer 105 of the n...n type |           |           |           |                       |             |
| C                           | -3.158745 | -0.538295 | -0.488303 |                       |             |
| C                           | -3.125631 | 0.982707  | -0.715347 |                       |             |
| N                           | -3.978198 | -0.884058 | 0.661824  |                       |             |
| H                           | -3.556562 | -0.501677 | 1.504779  |                       |             |
| H                           | -3.994307 | -1.891583 | 0.786066  |                       |             |
| H                           | -3.609906 | -0.975894 | -1.386532 |                       |             |
| C                           | -1.733562 | -1.095591 | -0.418495 |                       |             |
| O                           | -1.294586 | -1.743265 | 0.506079  |                       |             |
| O                           | -1.010248 | -0.765001 | -1.498740 |                       |             |
| H                           | -0.109471 | -1.142897 | -1.413186 |                       |             |
| H                           | -2.635207 | 1.221024  | -1.656941 |                       |             |
| H                           | -4.149791 | 1.353657  | -0.745398 |                       |             |
| S                           | -2.299888 | 1.932421  | 0.638299  |                       |             |
| H                           | -1.037898 | 1.606256  | 0.303763  |                       |             |
| C                           | 1.583185  | -0.002806 | 0.814202  |                       |             |
| C                           | 1.601498  | 1.150620  | -0.202789 |                       |             |
| N                           | 2.232309  | 0.382751  | 2.054839  |                       |             |
| H                           | 3.216445  | 0.572071  | 1.882075  |                       |             |
| H                           | 2.198606  | -0.382248 | 2.721220  |                       |             |
| H                           | 0.532606  | -0.230523 | 1.029110  |                       |             |
| C                           | 2.148960  | -1.292320 | 0.209617  |                       |             |
| O                           | 2.958192  | -2.011839 | 0.732470  |                       |             |
| O                           | 1.621395  | -1.554033 | -1.018332 |                       |             |
| H                           | 1.985275  | -2.388454 | -1.357565 |                       |             |
| H                           | 0.947426  | 0.946618  | -1.048006 |                       |             |
| H                           | 1.252842  | 2.053076  | 0.299393  |                       |             |
| S                           | 3.279841  | 1.575928  | -0.841510 |                       |             |
| H                           | 3.409656  | 0.503348  | -1.649153 |                       |             |
| 28                          |           |           |           |                       |             |
| Dimer 106 of the n...n type |           |           |           |                       |             |
| C                           | 1.848766  | -0.172267 | 0.881311  |                       |             |
| C                           | 1.417445  | 1.067340  | 0.078347  |                       |             |
| N                           | 2.662889  | 0.201883  | 2.024091  |                       |             |
| H                           | 3.541056  | 0.603239  | 1.705186  |                       |             |
| H                           | 2.902132  | -0.620343 | 2.568903  |                       |             |
| H                           | 0.927740  | -0.647372 | 1.236744  |                       |             |
| C                           | 2.518403  | -1.204698 | -0.027952 |                       |             |
| O                           | 3.607498  | -1.687259 | 0.138223  |                       |             |
| O                           | 1.726504  | -1.536637 | -1.085606 |                       |             |
| H                           | 2.174683  | -2.200837 | -1.634654 |                       |             |
| H                           | 0.670978  | 0.813480  | -0.671581 |                       |             |
| H                           | 0.987291  | 1.784946  | 0.776839  |                       |             |
| S                           | 2.798089  | 1.969058  | -0.748638 |                       |             |
| H                           | 3.003446  | 1.070924  | -1.734275 |                       |             |
| C                           | -3.146408 | -0.756517 | -0.385773 |                       |             |
| C                           | -3.232392 | 0.721671  | -0.807846 |                       |             |
| N                           | -3.965354 | -1.023445 | 0.784562  |                       |             |
| H                           | -3.602033 | -0.505067 | 1.580235  |                       |             |
| H                           | -3.908286 | -2.006006 | 1.033312  |                       |             |
| H                           | -3.535914 | -1.338089 | -1.228842 |                       |             |
| C                           | -1.680204 | -1.170574 | -0.227755 |                       |             |
| O                           | -1.182966 | -1.554396 | 0.808303  |                       |             |



| Nov 11, 22 15:56            | dimers_structures.xyz         | Page 47/325 |
|-----------------------------|-------------------------------|-------------|
| O                           | -1.001033 -1.040915 -1.375377 |             |
| H                           | -0.067465 -1.313850 -1.247669 |             |
| H                           | -2.690775 0.885359 -1.737698  |             |
| H                           | -4.280451 0.979544 -0.959110  |             |
| S                           | -2.625887 1.921251 0.459201   |             |
| H                           | -1.314054 1.643981 0.336694   |             |
| 28                          |                               |             |
| Dimer 107 of the n...n type |                               |             |
| C                           | -3.154172 0.939437 0.744346   |             |
| C                           | -4.184497 -0.183516 0.944742  |             |
| N                           | -3.711749 2.040654 -0.025479  |             |
| H                           | -3.952043 1.712171 -0.957667  |             |
| H                           | -3.009257 2.762377 -0.154174  |             |
| H                           | -2.898890 1.307257 1.745641   |             |
| C                           | -1.847366 0.381473 0.164817   |             |
| O                           | -1.288193 0.833418 -0.810016  |             |
| O                           | -1.394444 -0.663883 0.868846  |             |
| H                           | -0.548726 -0.988131 0.475904  |             |
| H                           | -3.811745 -0.924034 1.649125  |             |
| H                           | -5.103510 0.249900 1.338940   |             |
| S                           | -4.678881 -1.044571 -0.613692 |             |
| H                           | -3.517859 -1.706417 -0.797269 |             |
| C                           | 3.288392 0.855296 -0.399598   |             |
| C                           | 1.851984 0.431455 -0.061068   |             |
| N                           | 3.556466 0.739648 -1.823323   |             |
| H                           | 3.523967 -0.237665 -2.102011  |             |
| H                           | 4.497210 1.061689 -2.027846   |             |
| H                           | 3.369738 1.910196 -0.112883   |             |
| C                           | 4.295373 0.105071 0.480915    |             |
| O                           | 5.223979 -0.546858 0.066822   |             |
| O                           | 4.017772 0.257958 1.790244    |             |
| H                           | 4.675880 -0.227002 2.313489   |             |
| H                           | 1.620103 0.644661 0.980568    |             |
| H                           | 1.151735 0.972086 -0.694801   |             |
| S                           | 1.490958 -1.353368 -0.385247  |             |
| H                           | 2.125959 -1.852545 0.695527   |             |
| 28                          |                               |             |
| Dimer 108 of the n...n type |                               |             |
| C                           | 1.467223 -0.458845 -0.190099  |             |
| C                           | 1.779192 0.890722 -0.866091   |             |
| N                           | 0.676675 -0.279815 1.017487   |             |
| H                           | 1.253115 0.109942 1.758313    |             |
| H                           | 0.308131 -1.161353 1.358741   |             |
| H                           | 0.878341 -1.029328 -0.913214  |             |
| C                           | 2.760052 -1.240731 0.046032   |             |
| O                           | 3.201463 -1.531656 1.132390   |             |
| O                           | 3.366064 -1.549375 -1.114988  |             |
| H                           | 4.193532 -2.021002 -0.927468  |             |
| H                           | 2.343344 0.730995 -1.783221   |             |
| H                           | 0.842116 1.387281 -1.113610   |             |
| S                           | 2.677264 2.094596 0.202424    |             |
| H                           | 3.868120 1.460422 0.200815    |             |
| C                           | -3.133636 -0.308136 -0.608920 |             |
| C                           | -2.288165 0.900040 -1.062476  |             |
| N                           | -4.265400 0.108043 0.200329   |             |
| H                           | -3.931037 0.543438 1.055926   |             |
| H                           | -4.816587 -0.698331 0.476522  |             |
| H                           | -3.509381 -0.779705 -1.523172 |             |
| C                           | -2.242313 -1.354369 0.065182  |             |
| O                           | -2.260472 -1.641483 1.238302  |             |
| O                           | -1.412835 -1.940945 -0.825359 |             |
| H                           | -0.916070 -2.645655 -0.380096 |             |
| H                           | -1.453698 0.560110 -1.676526  |             |
| H                           | -2.919407 1.549071 -1.669008  |             |
| S                           | -1.647442 1.959827 0.305371   |             |
| H                           | -0.704478 1.061360 0.742035   |             |
| 28                          |                               |             |
| Dimer 109 of the n...n type |                               |             |
| C                           | 2.553747 -0.953890 0.391017   |             |

| Nov 11, 22 15:56            | dimers_structures.xyz         | Page 48/325 |
|-----------------------------|-------------------------------|-------------|
| C                           | 1.305152 -0.120225 0.710702   |             |
| N                           | 3.507467 -0.928122 1.486722   |             |
| H                           | 3.878040 0.012235 1.597855    |             |
| H                           | 4.301866 -1.522801 1.272369   |             |
| H                           | 2.204812 -1.984214 0.253951   |             |
| C                           | 3.151253 -0.534085 -0.958442  |             |
| O                           | 4.303139 -0.216340 -1.133370  |             |
| O                           | 2.227559 -0.561413 -1.937916  |             |
| H                           | 2.641411 -0.293802 -2.774106  |             |
| H                           | 0.551520 -0.245472 -0.063261  |             |
| H                           | 0.904497 -0.441570 1.671957   |             |
| S                           | 1.624028 1.691960 0.897089    |             |
| H                           | 1.694317 1.969789 -0.420971   |             |
| C                           | -3.356072 0.568218 -0.265015  |             |
| C                           | -3.502837 -0.529030 0.805288  |             |
| N                           | -3.797964 0.098820 -1.568178  |             |
| H                           | -3.178055 -0.640909 -1.888895 |             |
| H                           | -3.722331 0.846817 -2.250486  |             |
| H                           | -4.001842 1.395476 0.050100   |             |
| C                           | -1.923062 1.110772 -0.256458  |             |
| O                           | -1.166277 1.058003 -1.200755  |             |
| O                           | -1.592700 1.624023 0.936482   |             |
| H                           | -0.643001 1.888483 0.930119   |             |
| H                           | -3.293291 -0.128104 1.794961  |             |
| H                           | -4.526509 -0.902307 0.783334  |             |
| S                           | -2.439386 -2.015423 0.529197  |             |
| H                           | -1.275071 -1.457862 0.914621  |             |
| 28                          |                               |             |
| Dimer 110 of the n...n type |                               |             |
| C                           | 2.564202 0.982922 -0.326382   |             |
| C                           | 1.310990 0.191182 -0.727062   |             |
| N                           | 3.542218 1.013734 -1.400205   |             |
| H                           | 3.902512 0.077222 -1.564447   |             |
| H                           | 4.339199 1.581392 -1.129691   |             |
| H                           | 2.226688 2.007142 -0.129410   |             |
| C                           | 3.122764 0.462839 1.004265    |             |
| O                           | 4.257113 0.085618 1.175977    |             |
| O                           | 2.185327 0.473360 1.970622    |             |
| H                           | 2.573163 0.138027 2.794771    |             |
| H                           | 0.542177 0.277926 0.037406    |             |
| H                           | 0.937115 0.581488 -1.673414   |             |
| S                           | 1.609315 -1.609258 -1.026691  |             |
| H                           | 1.665885 -1.970168 0.271784   |             |
| C                           | -3.341892 -0.578959 0.296869  |             |
| C                           | -3.542570 0.543195 -0.737001  |             |
| N                           | -3.722425 -0.142004 1.630885  |             |
| H                           | -3.096604 0.600525 1.933660   |             |
| H                           | -3.598019 -0.901567 2.293056  |             |
| H                           | -3.999726 -1.401733 -0.005684 |             |
| C                           | -1.909927 -1.118962 0.211586  |             |
| O                           | -1.131077 -1.137222 1.138873  |             |
| O                           | -1.608394 -1.543192 -1.023485 |             |
| H                           | -0.659097 -1.807278 -1.056976 |             |
| H                           | -3.406825 0.162467 -1.747102  |             |
| H                           | -4.555533 0.932535 -0.637513  |             |
| S                           | -2.430627 2.001317 -0.501088  |             |
| H                           | -1.313631 1.425153 -0.986266  |             |
| 28                          |                               |             |
| Dimer 111 of the n...n type |                               |             |
| C                           | 2.589181 -0.197113 -1.072720  |             |
| C                           | 3.535232 -1.083397 -0.244185  |             |
| N                           | 3.314614 0.840133 -1.783863   |             |
| H                           | 3.756049 1.468097 -1.116967   |             |
| H                           | 2.673538 1.405702 -2.331114   |             |
| H                           | 2.109099 -0.857632 -1.804906  |             |
| C                           | 1.452321 0.333634 -0.198101   |             |
| O                           | 1.160291 1.507622 -0.090903   |             |
| O                           | 0.801672 -0.653975 0.437176   |             |
| H                           | 0.092394 -0.279137 0.990940   |             |

| Nov 11, 22 15:56            |           |           |           | dimers_structures.xyz | Page 49/325 |
|-----------------------------|-----------|-----------|-----------|-----------------------|-------------|
| H                           | 2.999715  | -1.936742 | 0.166566  |                       |             |
| H                           | 4.329625  | -1.444879 | -0.896522 |                       |             |
| S                           | 4.395678  | -0.199705 | 1.130817  |                       |             |
| H                           | 3.322893  | -0.084569 | 1.940666  |                       |             |
| C                           | -3.472283 | 0.296373  | 0.708662  |                       |             |
| C                           | -2.968336 | -1.152772 | 0.841046  |                       |             |
| N                           | -4.661363 | 0.364341  | -0.123645 |                       |             |
| H                           | -4.427790 | 0.090745  | -1.074742 |                       |             |
| H                           | -4.997592 | 1.320747  | -0.175853 |                       |             |
| H                           | -3.730666 | 0.625099  | 1.721679  |                       |             |
| C                           | -2.340295 | 1.214579  | 0.240482  |                       |             |
| O                           | -2.352313 | 1.867120  | -0.774488 |                       |             |
| O                           | -1.297321 | 1.206509  | 1.100699  |                       |             |
| H                           | -0.557479 | 1.733671  | 0.724507  |                       |             |
| H                           | -2.167223 | -1.219033 | 1.575315  |                       |             |
| H                           | -3.797384 | -1.771873 | 1.182874  |                       |             |
| S                           | -2.410869 | -1.928051 | -0.741159 |                       |             |
| H                           | -1.208434 | -1.323441 | -0.815395 |                       |             |
| 28                          |           |           |           |                       |             |
| Dimer 112 of the n...n type |           |           |           |                       |             |
| C                           | -3.154657 | -0.521437 | -0.226067 |                       |             |
| C                           | -3.016322 | 0.840998  | -0.940851 |                       |             |
| N                           | -3.875814 | -0.397735 | 1.028614  |                       |             |
| H                           | -3.335418 | 0.161821  | 1.682649  |                       |             |
| H                           | -4.000142 | -1.310733 | 1.454577  |                       |             |
| H                           | -3.729226 | -1.161571 | -0.902613 |                       |             |
| C                           | -1.770726 | -1.155300 | -0.094007 |                       |             |
| O                           | -1.122915 | -1.189525 | 0.930779  |                       |             |
| O                           | -1.328233 | -1.632218 | -1.266925 |                       |             |
| H                           | -0.421405 | -1.984550 | -1.161957 |                       |             |
| H                           | -2.466547 | 0.721616  | -1.873996 |                       |             |
| H                           | -4.016957 | 1.206946  | -1.171452 |                       |             |
| S                           | -2.253359 | 2.195480  | 0.054242  |                       |             |
| H                           | -0.981830 | 1.739329  | 0.119780  |                       |             |
| C                           | 1.366585  | 0.187522  | -0.148337 |                       |             |
| C                           | 2.504393  | 0.824963  | -0.969671 |                       |             |
| N                           | 0.981457  | 1.014484  | 0.980998  |                       |             |
| H                           | 1.798466  | 1.249279  | 1.537738  |                       |             |
| H                           | 0.341281  | 0.504011  | 1.581428  |                       |             |
| H                           | 0.523562  | 0.112465  | -0.838203 |                       |             |
| C                           | 1.761028  | -1.233850 | 0.242914  |                       |             |
| O                           | 2.313687  | -1.549887 | 1.264779  |                       |             |
| O                           | 1.445641  | -2.124238 | -0.736410 |                       |             |
| H                           | 1.757270  | -3.007861 | -0.479821 |                       |             |
| H                           | 2.728588  | 0.206688  | -1.838599 |                       |             |
| H                           | 2.165749  | 1.801420  | -1.317872 |                       |             |
| S                           | 4.061018  | 1.170897  | -0.043800 |                       |             |
| H                           | 4.367319  | -0.108577 | 0.252328  |                       |             |
| 28                          |           |           |           |                       |             |
| Dimer 113 of the n...n type |           |           |           |                       |             |
| C                           | -1.939045 | 0.775967  | 0.469174  |                       |             |
| C                           | -3.209169 | 0.099477  | 1.011829  |                       |             |
| N                           | -2.241372 | 1.789348  | -0.526101 |                       |             |
| H                           | -2.640734 | 1.350134  | -1.351252 |                       |             |
| H                           | -1.373092 | 2.228412  | -0.817925 |                       |             |
| H                           | -1.451614 | 1.260476  | 1.320283  |                       |             |
| C                           | -0.953880 | -0.285905 | -0.018604 |                       |             |
| O                           | -0.641582 | -0.458211 | -1.175717 |                       |             |
| O                           | -0.463819 | -1.012342 | 1.001380  |                       |             |
| H                           | 0.248146  | -1.599065 | 0.665934  |                       |             |
| H                           | -2.957373 | -0.587869 | 1.818206  |                       |             |
| H                           | -3.875645 | 0.869278  | 1.400741  |                       |             |
| S                           | -4.210008 | -0.800438 | -0.253611 |                       |             |
| H                           | -3.344616 | -1.814259 | -0.461330 |                       |             |
| C                           | 2.857879  | 0.700608  | 0.552028  |                       |             |
| C                           | 3.482560  | -0.558926 | -0.060296 |                       |             |
| N                           | 2.421744  | 0.482742  | 1.925334  |                       |             |
| H                           | 1.610822  | -0.129618 | 1.940551  |                       |             |
| H                           | 2.112084  | 1.361627  | 2.328510  |                       |             |

| Nov 11, 22 15:56            |           |           |           | dimers_structures.xyz | Page 50/325 |
|-----------------------------|-----------|-----------|-----------|-----------------------|-------------|
| H                           | 3.660370  | 1.449893  | 0.570132  |                       |             |
| C                           | 1.770013  | 1.333823  | -0.327080 |                       |             |
| O                           | 0.835601  | 1.963567  | 0.115374  |                       |             |
| O                           | 1.968291  | 1.132017  | -1.638284 |                       |             |
| H                           | 1.230369  | 1.524770  | -2.132303 |                       |             |
| H                           | 3.955257  | -0.326913 | -1.012359 |                       |             |
| H                           | 4.241897  | -0.933971 | 0.624871  |                       |             |
| S                           | 2.336280  | -1.981614 | -0.340116 |                       |             |
| H                           | 1.663096  | -1.435196 | -1.373397 |                       |             |
| 28                          |           |           |           |                       |             |
| Dimer 114 of the n...n type |           |           |           |                       |             |
| C                           | 2.985029  | -1.006295 | 0.317002  |                       |             |
| C                           | 3.063431  | 0.353391  | 1.038172  |                       |             |
| N                           | 4.009581  | -1.120481 | -0.707514 |                       |             |
| H                           | 3.825704  | -0.449460 | -1.448858 |                       |             |
| H                           | 3.974906  | -2.040042 | -1.136158 |                       |             |
| H                           | 3.165117  | -1.769515 | 1.081542  |                       |             |
| C                           | 1.564430  | -1.244468 | -0.198163 |                       |             |
| O                           | 1.249791  | -1.282037 | -1.366588 |                       |             |
| O                           | 0.688593  | -1.395705 | 0.808898  |                       |             |
| H                           | -0.205160 | -1.570243 | 0.451175  |                       |             |
| H                           | 2.326266  | 0.404595  | 1.838556  |                       |             |
| H                           | 4.058481  | 0.452822  | 1.471314  |                       |             |
| S                           | 2.855727  | 1.824650  | -0.059307 |                       |             |
| H                           | 1.503543  | 1.806853  | -0.098292 |                       |             |
| C                           | -2.910788 | 0.139316  | -0.874022 |                       |             |
| C                           | -1.503340 | 0.750304  | -0.926670 |                       |             |
| N                           | -3.933227 | 1.171056  | -0.832247 |                       |             |
| H                           | -3.847019 | 1.705590  | 0.028568  |                       |             |
| H                           | -4.856652 | 0.749833  | -0.816337 |                       |             |
| H                           | -3.030766 | -0.434039 | -1.801837 |                       |             |
| C                           | -3.054029 | -0.895438 | 0.246405  |                       |             |
| O                           | -3.960284 | -0.940676 | 1.036432  |                       |             |
| O                           | -2.050882 | -1.818759 | 0.235745  |                       |             |
| H                           | -2.254050 | -2.499155 | 0.900183  |                       |             |
| H                           | -0.751979 | -0.003655 | -1.148898 |                       |             |
| H                           | -1.485231 | 1.487708  | -1.728690 |                       |             |
| S                           | -1.015019 | 1.681843  | 0.590613  |                       |             |
| H                           | -0.695102 | 0.617354  | 1.352926  |                       |             |
| 28                          |           |           |           |                       |             |
| Dimer 115 of the n...n type |           |           |           |                       |             |
| C                           | 3.001558  | -0.439677 | -0.351139 |                       |             |
| C                           | 2.793322  | 0.934617  | -1.008108 |                       |             |
| N                           | 2.391173  | -1.504018 | -1.128493 |                       |             |
| H                           | 1.378638  | -1.400935 | -1.132788 |                       |             |
| H                           | 2.577412  | -2.401975 | -0.692871 |                       |             |
| H                           | 4.085546  | -0.603649 | -0.321086 |                       |             |
| C                           | 2.550723  | -0.413916 | 1.114722  |                       |             |
| O                           | 1.779724  | -1.199447 | 1.613001  |                       |             |
| O                           | 3.119713  | 0.600132  | 1.794716  |                       |             |
| H                           | 2.814401  | 0.574669  | 2.715794  |                       |             |
| H                           | 3.383276  | 1.695425  | -0.501067 |                       |             |
| H                           | 3.111711  | 0.874789  | -2.048505 |                       |             |
| S                           | 1.034777  | 1.491961  | -1.067352 |                       |             |
| H                           | 0.881174  | 1.708475  | 0.253791  |                       |             |
| C                           | -2.567326 | -0.241772 | 0.969118  |                       |             |
| C                           | -1.331482 | -1.065023 | 0.559055  |                       |             |
| N                           | -3.795314 | -0.994880 | 0.774454  |                       |             |
| H                           | -3.944153 | -1.155700 | -0.218191 |                       |             |
| H                           | -4.592411 | -0.460383 | 1.105400  |                       |             |
| H                           | -2.450401 | -0.026635 | 2.035874  |                       |             |
| C                           | -2.550123 | 1.106230  | 0.244488  |                       |             |
| O                           | -3.262202 | 1.402103  | -0.685533 |                       |             |
| O                           | -1.619630 | 1.935800  | 0.760201  |                       |             |
| H                           | -1.632459 | 2.771441  | 0.265943  |                       |             |
| H                           | -0.414452 | -0.513425 | 0.751137  |                       |             |
| H                           | -1.312059 | -1.976752 | 1.155409  |                       |             |
| S                           | -1.321997 | -1.637674 | -1.193629 |                       |             |
| H                           | -0.982578 | -0.453097 | -1.742748 |                       |             |

| Nov 11, 22 15:56            | dimers_structures.xyz         | Page 51/325 |
|-----------------------------|-------------------------------|-------------|
| 28                          |                               |             |
| Dimer 116 of the n...n type |                               |             |
| C                           | 2.018260 0.662891 -0.630055   |             |
| C                           | 1.258469 -0.660646 -0.796661  |             |
| N                           | 3.142474 0.754248 -1.547501   |             |
| H                           | 3.817816 0.025099 -1.331496   |             |
| H                           | 3.626712 1.637118 -1.418134   |             |
| H                           | 1.300849 1.456148 -0.869565   |             |
| C                           | 2.402199 0.894022 0.834084    |             |
| O                           | 3.506880 1.185465 1.225120    |             |
| O                           | 1.342039 0.744531 1.655917    |             |
| H                           | 1.617566 0.918182 2.570151    |             |
| H                           | 0.337972 -0.656616 -0.222131  |             |
| H                           | 1.013018 -0.790232 -1.850464  |             |
| S                           | 2.225958 -2.160698 -0.323968  |             |
| H                           | 2.135758 -1.983903 1.010334   |             |
| C                           | -2.789051 0.306208 0.858574   |             |
| C                           | -3.023805 1.250193 -0.331135  |             |
| N                           | -1.809476 0.847030 1.784483   |             |
| H                           | -0.899486 0.914689 1.336556   |             |
| H                           | -1.685483 0.212508 2.567201   |             |
| H                           | -3.752388 0.219520 1.376292   |             |
| C                           | -2.460374 -1.113288 0.378609  |             |
| O                           | -1.518849 -1.768455 0.759490  |             |
| O                           | -3.356704 -1.558620 -0.521981 |             |
| H                           | -3.118659 -2.462097 -0.785326 |             |
| H                           | -3.860882 0.907520 -0.935777  |             |
| H                           | -3.249318 2.244575 0.053339   |             |
| S                           | -1.553953 1.475483 -1.425796  |             |
| H                           | -1.587677 0.252340 -1.992492  |             |
| 28                          |                               |             |
| Dimer 117 of the n...n type |                               |             |
| C                           | 2.551603 -0.954712 0.387990   |             |
| C                           | 1.303236 -0.123653 0.715143   |             |
| N                           | 3.510197 -0.929910 1.479512   |             |
| H                           | 3.880150 0.010688 1.590691    |             |
| H                           | 4.304322 -1.523211 1.260399   |             |
| H                           | 2.203580 -1.985250 0.250245   |             |
| C                           | 3.142524 -0.530915 -0.963065  |             |
| O                           | 4.292789 -0.209546 -1.142002  |             |
| O                           | 2.215077 -0.559301 -1.938955  |             |
| H                           | 2.624830 -0.288822 -2.776239  |             |
| H                           | 0.545877 -0.248808 -0.055140  |             |
| H                           | 0.907735 -0.447590 1.677557   |             |
| S                           | 1.620238 1.688646 0.903979    |             |
| H                           | 1.678722 1.969953 -0.413909   |             |
| C                           | -3.352055 0.565672 -0.272860  |             |
| C                           | -3.507377 -0.532844 0.794596  |             |
| N                           | -3.780546 0.096225 -1.580683  |             |
| H                           | -3.154871 -0.640841 -1.896449 |             |
| H                           | -3.700226 0.845172 -2.261444  |             |
| H                           | -4.002505 1.391602 0.036252   |             |
| C                           | -1.920489 1.111629 -0.251636  |             |
| O                           | -1.159832 1.071593 -1.193404  |             |
| O                           | -1.596271 1.612939 0.948076   |             |
| H                           | -0.647512 1.880782 0.947240   |             |
| H                           | -3.314489 -0.131863 1.787596  |             |
| H                           | -4.528380 -0.912114 0.757614  |             |
| S                           | -2.429141 -2.011464 0.532705  |             |
| H                           | -1.281093 -1.455369 0.966111  |             |
| 28                          |                               |             |
| Dimer 118 of the n...n type |                               |             |
| C                           | 2.744672 0.849971 0.191546    |             |
| C                           | 3.243949 -0.581681 0.442514   |             |
| N                           | 2.207796 1.446001 1.402090    |             |
| H                           | 1.366863 0.954506 1.692128    |             |
| H                           | 1.957030 2.416051 1.244022    |             |
| H                           | 3.621537 1.430323 -0.122337   |             |
| C                           | 1.787381 0.912506 -1.005037   |             |

| Nov 11, 22 15:56            | dimers_structures.xyz         | Page 52/325 |
|-----------------------------|-------------------------------|-------------|
| O                           | 0.750308 1.539775 -1.028076   |             |
| O                           | 2.232988 0.201780 -2.051486   |             |
| H                           | 1.615550 0.299359 -2.794611   |             |
| H                           | 3.746387 -0.974188 -0.438908  |             |
| H                           | 3.951938 -0.559112 1.270383   |             |
| S                           | 1.928860 -1.767279 0.961984   |             |
| H                           | 1.288582 -1.841718 -0.225168  |             |
| C                           | -2.768328 -0.165061 0.855868  |             |
| C                           | -1.775183 -1.303634 0.550112  |             |
| N                           | -4.070826 -0.415360 0.262560  |             |
| H                           | -3.987619 -0.414581 -0.750749 |             |
| H                           | -4.712438 0.335431 0.498072   |             |
| H                           | -2.871878 -0.130734 1.945521  |             |
| C                           | -2.124820 1.153039 0.420583   |             |
| O                           | -2.513248 1.838291 -0.496189  |             |
| O                           | -1.021669 1.424038 1.140228   |             |
| H                           | -0.493219 2.083127 0.656438   |             |
| H                           | -0.853524 -1.155156 1.109490  |             |
| H                           | -2.223777 -2.252524 0.843426  |             |
| S                           | -1.356121 -1.503029 -1.238861 |             |
| H                           | -0.761088 -0.302247 -1.399563 |             |
| 28                          |                               |             |
| Dimer 119 of the n...n type |                               |             |
| C                           | 2.536627 -0.948308 -0.442973  |             |
| C                           | 3.523451 0.167879 -0.831165   |             |
| N                           | 1.375426 -0.967210 -1.312583  |             |
| H                           | 0.810725 -0.127353 -1.174910  |             |
| H                           | 0.773088 -1.744839 -1.060882  |             |
| H                           | 3.084823 -1.890562 -0.560111  |             |
| C                           | 2.203356 -0.847545 1.050697   |             |
| O                           | 1.100048 -0.670984 1.513273   |             |
| O                           | 3.308579 -0.971695 1.811140   |             |
| H                           | 3.060325 -0.891587 2.746098   |             |
| H                           | 4.448782 0.072505 -0.265793   |             |
| H                           | 3.747722 0.074876 -1.893679   |             |
| S                           | 2.873329 1.883519 -0.625512   |             |
| H                           | 2.869721 1.895705 0.723468    |             |
| C                           | -2.189483 0.887057 -0.596573  |             |
| C                           | -2.471427 -0.402033 -1.390670 |             |
| N                           | -0.778664 1.023638 -0.292987  |             |
| H                           | -0.499752 0.378409 0.442521   |             |
| H                           | -0.564654 1.957162 0.039668   |             |
| H                           | -2.494590 1.715409 -1.245592  |             |
| C                           | -3.095028 0.957836 0.637141   |             |
| O                           | -2.706761 1.035623 1.778418   |             |
| O                           | -4.398420 0.905546 0.297664   |             |
| H                           | -4.937914 0.941281 1.103778   |             |
| H                           | -3.507663 -0.429259 -1.722939 |             |
| H                           | -1.819003 -0.416716 -2.263639 |             |
| S                           | -2.093098 -1.965587 -0.486613 |             |
| H                           | -3.105185 -1.894185 0.402318  |             |
| 28                          |                               |             |
| Dimer 120 of the n...n type |                               |             |
| C                           | 2.582471 0.920275 -0.576499   |             |
| C                           | 1.940445 -0.322669 -1.225220  |             |
| N                           | 4.012468 0.754022 -0.388218   |             |
| H                           | 4.191604 0.044649 0.316955    |             |
| H                           | 4.423013 1.616844 -0.045463   |             |
| H                           | 2.408840 1.747779 -1.270608   |             |
| C                           | 1.803980 1.230144 0.703705    |             |
| O                           | 2.178352 0.956292 1.819541    |             |
| O                           | 0.614217 1.788830 0.424429    |             |
| H                           | 0.056053 1.772395 1.219076    |             |
| H                           | 0.875121 -0.152731 -1.379727  |             |
| H                           | 2.410431 -0.500703 -2.191871  |             |
| S                           | 2.174474 -1.902578 -0.290415  |             |
| H                           | 1.685901 -1.464592 0.889861   |             |
| C                           | -2.890494 -0.796499 0.383430  |             |
| C                           | -3.205106 -0.062962 -0.934013 |             |

| Nov 11, 22 15:56            |           | dimers_structures.xyz |           | Page 53/325 |  |
|-----------------------------|-----------|-----------------------|-----------|-------------|--|
| N                           | -3.370805 | -0.057255             | 1.538004  |             |  |
| H                           | -2.876361 | 0.827855              | 1.610307  |             |  |
| H                           | -3.170410 | -0.571082             | 2.390327  |             |  |
| H                           | -3.419859 | -1.754143             | 0.333123  |             |  |
| C                           | -1.397871 | -1.137552             | 0.436424  |             |  |
| O                           | -0.615460 | -0.666258             | 1.233460  |             |  |
| O                           | -1.055485 | -2.005915             | -0.525100 |             |  |
| H                           | -0.090129 | -2.194060             | -0.482287 |             |  |
| H                           | -2.892880 | -0.666940             | -1.784376 |             |  |
| H                           | -4.281126 | 0.100437              | -0.993592 |             |  |
| S                           | -2.463035 | 1.621425              | -1.079801 |             |  |
| H                           | -1.168425 | 1.247362              | -1.082380 |             |  |
| 28                          |           |                       |           |             |  |
| Dimer 121 of the n...n type |           |                       |           |             |  |
| C                           | -1.463643 | -0.027120             | 0.735862  |             |  |
| C                           | -1.283558 | -0.870911             | -0.541487 |             |  |
| N                           | -1.947189 | -0.837500             | 1.836814  |             |  |
| H                           | -2.879887 | -1.183495             | 1.628214  |             |  |
| H                           | -2.022987 | -0.279710             | 2.681311  |             |  |
| H                           | -0.479555 | 0.369948              | 1.003160  |             |  |
| C                           | -2.328594 | 1.199638              | 0.438903  |             |  |
| O                           | -3.420611 | 1.417093              | 0.894635  |             |  |
| O                           | -1.710533 | 2.041030              | -0.431928 |             |  |
| H                           | -2.278589 | 2.807105              | -0.614014 |             |  |
| H                           | -0.815467 | -0.288430             | -1.330851 |             |  |
| H                           | -0.639776 | -1.716751             | -0.301198 |             |  |
| S                           | -2.835524 | -1.623693             | -1.192952 |             |  |
| H                           | -3.378945 | -0.488690             | -1.679687 |             |  |
| C                           | 2.945937  | 0.404242              | -0.712629 |             |  |
| C                           | 2.459937  | -1.059576             | -0.791649 |             |  |
| N                           | 4.130069  | 0.534653              | 0.118060  |             |  |
| H                           | 3.900616  | 0.323078              | 1.085099  |             |  |
| H                           | 4.469421  | 1.491247              | 0.098089  |             |  |
| H                           | 3.194870  | 0.698256              | -1.736267 |             |  |
| C                           | 1.762379  | 1.263526              | -0.268538 |             |  |
| O                           | 1.578037  | 1.639089              | 0.869311  |             |  |
| O                           | 0.903655  | 1.483145              | -1.273214 |             |  |
| H                           | 0.092454  | 1.919645              | -0.939984 |             |  |
| H                           | 1.584453  | -1.128935             | -1.437133 |             |  |
| H                           | 3.256328  | -1.667144             | -1.221762 |             |  |
| S                           | 2.096734  | -1.866946             | 0.828851  |             |  |
| H                           | 1.178411  | -0.987621             | 1.273319  |             |  |
| 28                          |           |                       |           |             |  |
| Dimer 122 of the n...n type |           |                       |           |             |  |
| C                           | 3.200824  | 0.529294              | 0.319412  |             |  |
| C                           | 3.144378  | -0.278075             | -0.993474 |             |  |
| N                           | 3.615933  | -0.300986             | 1.436866  |             |  |
| H                           | 2.903740  | -1.001303             | 1.626227  |             |  |
| H                           | 3.703064  | 0.260341              | 2.278127  |             |  |
| H                           | 3.953520  | 1.309528              | 0.163361  |             |  |
| C                           | 1.879851  | 1.263808              | 0.553179  |             |  |
| O                           | 1.097779  | 1.029021              | 1.444446  |             |  |
| O                           | 1.681691  | 2.224045              | -0.372488 |             |  |
| H                           | 0.858081  | 2.696524              | -0.173904 |             |  |
| H                           | 2.831477  | 0.358292              | -1.819998 |             |  |
| H                           | 4.147372  | -0.649951             | -1.201745 |             |  |
| S                           | 2.072130  | -1.780581             | -0.945075 |             |  |
| H                           | 0.874807  | -1.229539             | -1.263634 |             |  |
| C                           | -1.398457 | -0.558493             | 0.061112  |             |  |
| C                           | -1.426579 | 0.910595              | -0.381988 |             |  |
| N                           | -1.284660 | -1.442890             | -1.086889 |             |  |
| H                           | -2.075845 | -1.306540             | -1.710790 |             |  |
| H                           | -1.312862 | -2.413433             | -0.789707 |             |  |
| H                           | -0.500806 | -0.672179             | 0.680231  |             |  |
| C                           | -2.574494 | -0.890287             | 0.980918  |             |  |
| O                           | -3.309365 | -1.839832             | 0.847977  |             |  |
| O                           | -2.686805 | 0.004248              | 1.981741  |             |  |
| H                           | -3.428487 | -0.250624             | 2.553614  |             |  |
| H                           | -1.311940 | 1.565848              | 0.477389  |             |  |

Nov 11, 22 15:56

dimers\_structures.xyz

Page 54/325

|                             |           |           |           |
|-----------------------------|-----------|-----------|-----------|
| H                           | -0.596797 | 1.072185  | -1.069444 |
| S                           | -2.934655 | 1.398315  | -1.327954 |
| H                           | -3.783385 | 1.383338  | -0.279453 |
| 28                          |           |           |           |
| Dimer 123 of the n...n type |           |           |           |
| C                           | -2.079933 | -0.049001 | -0.959535 |
| C                           | -1.866077 | -1.429807 | -0.308464 |
| N                           | -0.838583 | 0.703769  | -1.051822 |
| H                           | -0.584515 | 1.061861  | -0.134925 |
| H                           | -0.958040 | 1.509437  | -1.657171 |
| H                           | -2.455503 | -0.240792 | -1.969723 |
| C                           | -3.185728 | 0.707997  | -0.218277 |
| O                           | -3.031170 | 1.749328  | 0.374616  |
| O                           | -4.361089 | 0.055218  | -0.285378 |
| H                           | -5.029038 | 0.550457  | 0.215323  |
| H                           | -2.803278 | -1.983040 | -0.281939 |
| H                           | -1.150220 | -1.995574 | -0.901704 |
| S                           | -1.146951 | -1.378594 | 1.388024  |
| H                           | -2.244358 | -0.908529 | 2.016975  |
| C                           | 3.007391  | 0.248096  | 0.551262  |
| C                           | 3.178510  | -0.590536 | -0.725582 |
| N                           | 2.657905  | -0.571898 | 1.699505  |
| H                           | 1.747171  | -0.997457 | 1.545492  |
| H                           | 2.560354  | 0.013210  | 2.523480  |
| H                           | 3.984043  | 0.712755  | 0.739722  |
| C                           | 2.056800  | 1.432561  | 0.336352  |
| O                           | 1.185030  | 1.760930  | 1.108336  |
| O                           | 2.320416  | 2.098300  | -0.802546 |
| H                           | 1.723735  | 2.860811  | -0.870339 |
| H                           | 3.494585  | 0.045288  | -1.550220 |
| H                           | 3.950371  | -1.338908 | -0.546317 |
| S                           | 1.688407  | -1.553736 | -1.235125 |
| H                           | 0.794866  | -0.521402 | -1.323580 |
| 28                          |           |           |           |
| Dimer 124 of the n...n type |           |           |           |
| C                           | 1.680134  | 0.296467  | 0.065404  |
| C                           | 2.941664  | 1.077813  | -0.343348 |
| N                           | 1.437283  | 0.346774  | 1.496209  |
| H                           | 2.223425  | -0.067514 | 1.989745  |
| H                           | 0.621927  | -0.233451 | 1.684751  |
| H                           | 0.848689  | 0.777451  | -0.452762 |
| C                           | 1.766121  | -1.126345 | -0.484623 |
| O                           | 2.189266  | -2.080712 | 0.125608  |
| O                           | 1.346108  | -1.191209 | -1.764486 |
| H                           | 1.462908  | -2.098373 | -2.089843 |
| H                           | 3.054804  | 1.066575  | -1.427359 |
| H                           | 2.826538  | 2.111870  | -0.016654 |
| S                           | 4.516532  | 0.513732  | 0.437576  |
| H                           | 4.528476  | -0.727617 | -0.089532 |
| C                           | -2.201450 | -0.233257 | 0.879473  |
| C                           | -1.892729 | 1.253688  | 0.627592  |
| N                           | -1.123115 | -1.088464 | 0.412556  |
| H                           | -1.052810 | -1.034751 | -0.600568 |
| H                           | -1.317785 | -2.058818 | 0.636549  |
| H                           | -2.292937 | -0.347214 | 1.965545  |
| C                           | -3.569453 | -0.603116 | 0.297172  |
| O                           | -3.758527 | -1.470435 | -0.522047 |
| O                           | -4.548606 | 0.167950  | 0.806830  |
| H                           | -5.396265 | -0.090740 | 0.410904  |
| H                           | -2.657990 | 1.881393  | 1.079677  |
| H                           | -0.930261 | 1.495009  | 1.078293  |
| S                           | -1.720939 | 1.708874  | -1.153698 |
| H                           | -3.019010 | 1.560051  | -1.489424 |
| 28                          |           |           |           |
| Dimer 125 of the n...n type |           |           |           |
| C                           | 1.625261  | -0.057294 | -0.398809 |
| C                           | 2.378787  | 1.260170  | -0.162224 |
| N                           | 0.698494  | -0.338137 | 0.685279  |
| H                           | 1.201874  | -0.435140 | 1.562792  |

| Nov 11, 22 15:56            |           |           |           | dimers_structures.xyz | Page 55/325 |
|-----------------------------|-----------|-----------|-----------|-----------------------|-------------|
| H                           | 0.214286  | -1.214001 | 0.520302  |                       |             |
| H                           | 1.046664  | 0.085354  | -1.320043 |                       |             |
| C                           | 2.587363  | -1.211671 | -0.688588 |                       |             |
| O                           | 2.564747  | -2.283031 | -0.131394 |                       |             |
| O                           | 3.465755  | -0.892779 | -1.657596 |                       |             |
| H                           | 4.046486  | -1.652673 | -1.823105 |                       |             |
| H                           | 2.963100  | 1.528301  | -1.039662 |                       |             |
| H                           | 1.650843  | 2.048635  | 0.026852  |                       |             |
| S                           | 3.485301  | 1.245527  | 1.314772  |                       |             |
| H                           | 4.435014  | 0.443436  | 0.790557  |                       |             |
| C                           | -3.305864 | -0.363935 | -0.567824 |                       |             |
| C                           | -2.127418 | 0.249162  | -1.349032 |                       |             |
| N                           | -4.420321 | 0.565384  | -0.485939 |                       |             |
| H                           | -4.149271 | 1.372427  | 0.069962  |                       |             |
| H                           | -5.203832 | 0.133356  | -0.006367 |                       |             |
| H                           | -3.624314 | -1.246622 | -1.132458 |                       |             |
| C                           | -2.833223 | -0.877067 | 0.794920  |                       |             |
| O                           | -3.137943 | -0.400012 | 1.861441  |                       |             |
| O                           | -2.024803 | -1.952436 | 0.669096  |                       |             |
| H                           | -1.779428 | -2.263017 | 1.555720  |                       |             |
| H                           | -1.324824 | -0.480602 | -1.453526 |                       |             |
| H                           | -2.482714 | 0.517501  | -2.343503 |                       |             |
| S                           | -1.434550 | 1.795470  | -0.614509 |                       |             |
| H                           | -0.644609 | 1.146243  | 0.289843  |                       |             |
| 28                          |           |           |           |                       |             |
| Dimer 126 of the n...n type |           |           |           |                       |             |
| C                           | -3.120104 | 0.433001  | -0.137634 |                       |             |
| C                           | -3.213472 | -1.100790 | -0.170865 |                       |             |
| N                           | -2.932959 | 0.988221  | -1.467966 |                       |             |
| H                           | -2.098325 | 0.590062  | -1.890253 |                       |             |
| H                           | -2.777925 | 1.989863  | -1.410708 |                       |             |
| H                           | -4.076758 | 0.793349  | 0.261021  |                       |             |
| C                           | -2.066980 | 0.895686  | 0.875946  |                       |             |
| O                           | -1.169186 | 1.668105  | 0.634463  |                       |             |
| O                           | -2.269715 | 0.351753  | 2.088929  |                       |             |
| H                           | -1.589436 | 0.675347  | 2.699998  |                       |             |
| H                           | -3.460008 | -1.482481 | 0.817951  |                       |             |
| H                           | -4.002353 | -1.388553 | -0.865623 |                       |             |
| S                           | -1.682770 | -1.939409 | -0.777856 |                       |             |
| H                           | -0.847795 | -1.496288 | 0.212393  |                       |             |
| C                           | 1.633355  | -0.753227 | -0.059156 |                       |             |
| C                           | 1.292924  | 0.386364  | -1.031804 |                       |             |
| N                           | 0.788705  | -0.703089 | 1.125957  |                       |             |
| H                           | 0.753753  | 0.247037  | 1.485795  |                       |             |
| H                           | 1.168580  | -1.290158 | 1.861911  |                       |             |
| H                           | 1.429443  | -1.690666 | -0.594573 |                       |             |
| C                           | 3.128786  | -0.797698 | 0.258812  |                       |             |
| O                           | 3.597708  | -0.884126 | 1.368572  |                       |             |
| O                           | 3.871591  | -0.753442 | -0.863146 |                       |             |
| H                           | 4.810855  | -0.807577 | -0.624912 |                       |             |
| H                           | 1.724016  | 0.192085  | -2.010976 |                       |             |
| H                           | 0.211162  | 0.450522  | -1.125445 |                       |             |
| S                           | 1.836100  | 2.057612  | -0.465852 |                       |             |
| H                           | 3.141047  | 1.891943  | -0.765525 |                       |             |
| 28                          |           |           |           |                       |             |
| Dimer 127 of the n...n type |           |           |           |                       |             |
| C                           | 2.316951  | -0.121759 | 1.145082  |                       |             |
| C                           | 2.130199  | -1.534462 | 0.568777  |                       |             |
| N                           | 1.137925  | 0.322562  | 1.872063  |                       |             |
| H                           | 0.288623  | 0.040774  | 1.392412  |                       |             |
| H                           | 1.115563  | 1.336358  | 1.919956  |                       |             |
| H                           | 3.164557  | -0.181936 | 1.841265  |                       |             |
| C                           | 2.780150  | 0.856009  | 0.061399  |                       |             |
| O                           | 2.291719  | 1.939882  | -0.151975 |                       |             |
| O                           | 3.837219  | 0.371149  | -0.619676 |                       |             |
| H                           | 4.117173  | 1.026613  | -1.278402 |                       |             |
| H                           | 3.091345  | -1.981961 | 0.327289  |                       |             |
| H                           | 1.632218  | -2.154271 | 1.314215  |                       |             |
| S                           | 1.066899  | -1.613968 | -0.941662 |                       |             |

| Nov 11, 22 15:56            |           |           |           | dimers_structures.xyz | Page 56/325 |
|-----------------------------|-----------|-----------|-----------|-----------------------|-------------|
| H                           | 2.010773  | -1.204537 | -1.812814 |                       |             |
| C                           | -3.091348 | 0.159596  | 0.077624  |                       |             |
| C                           | -2.558734 | 1.066322  | -1.050933 |                       |             |
| N                           | -3.236988 | 0.891067  | 1.324442  |                       |             |
| H                           | -2.324046 | 1.194294  | 1.653156  |                       |             |
| H                           | -3.618771 | 0.285887  | 2.044452  |                       |             |
| H                           | -4.078396 | -0.187149 | -0.245988 |                       |             |
| C                           | -2.211982 | -1.086779 | 0.189967  |                       |             |
| O                           | -1.472422 | -1.331647 | 1.116472  |                       |             |
| O                           | -2.338404 | -1.880163 | -0.886901 |                       |             |
| H                           | -1.717891 | -2.622797 | -0.808947 |                       |             |
| H                           | -2.494992 | 0.508907  | -1.984415 |                       |             |
| H                           | -3.257614 | 1.892193  | -1.183723 |                       |             |
| S                           | -0.930305 | 1.861274  | -0.701341 |                       |             |
| H                           | -0.156920 | 0.767980  | -0.880801 |                       |             |
| 28                          |           |           |           |                       |             |
| Dimer 128 of the n...n type |           |           |           |                       |             |
| C                           | -2.973996 | 0.398384  | -0.532836 |                       |             |
| C                           | -3.138523 | -0.508194 | 0.696879  |                       |             |
| N                           | -2.922149 | -0.375922 | -1.763113 |                       |             |
| H                           | -2.113973 | -0.993285 | -1.742711 |                       |             |
| H                           | -2.786471 | 0.242627  | -2.556738 |                       |             |
| H                           | -3.862389 | 1.041746  | -0.562506 |                       |             |
| C                           | -1.787059 | 1.356455  | -0.366760 |                       |             |
| O                           | -0.943297 | 1.550408  | -1.210799 |                       |             |
| O                           | -1.794154 | 1.969523  | 0.828338  |                       |             |
| H                           | -0.985268 | 2.500572  | 0.907626  |                       |             |
| H                           | -3.305573 | 0.087224  | 1.591786  |                       |             |
| H                           | -3.999442 | -1.157509 | 0.539266  |                       |             |
| S                           | -1.716546 | -1.650461 | 0.996636  |                       |             |
| H                           | -0.835354 | -0.704742 | 1.380387  |                       |             |
| C                           | 2.091123  | 0.638276  | -0.722795 |                       |             |
| C                           | 1.338177  | -0.666515 | -1.021812 |                       |             |
| N                           | 3.414083  | 0.635135  | -1.327062 |                       |             |
| H                           | 3.978006  | -0.100024 | -0.907482 |                       |             |
| H                           | 3.892004  | 1.508209  | -1.126895 |                       |             |
| H                           | 1.492300  | 1.440086  | -1.167623 |                       |             |
| C                           | 2.114788  | 0.929843  | 0.780147  |                       |             |
| O                           | 3.104844  | 1.179485  | 1.422939  |                       |             |
| O                           | 0.876881  | 0.884932  | 1.326871  |                       |             |
| H                           | 0.947806  | 1.070877  | 2.277372  |                       |             |
| H                           | 0.289707  | -0.576145 | -0.759575 |                       |             |
| H                           | 1.409780  | -0.866808 | -2.090557 |                       |             |
| S                           | 2.030486  | -2.162223 | -0.192596 |                       |             |
| H                           | 1.591045  | -1.868640 | 1.048511  |                       |             |
| 28                          |           |           |           |                       |             |
| Dimer 129 of the n...n type |           |           |           |                       |             |
| C                           | 2.217794  | 0.648093  | 0.968741  |                       |             |
| C                           | 3.444939  | -0.238866 | 0.702437  |                       |             |
| N                           | 1.166111  | -0.088478 | 1.646358  |                       |             |
| H                           | 0.938306  | -0.925039 | 1.115967  |                       |             |
| H                           | 0.319066  | 0.468406  | 1.694870  |                       |             |
| H                           | 2.559521  | 1.461242  | 1.621032  |                       |             |
| C                           | 1.760977  | 1.337867  | -0.321912 |                       |             |
| O                           | 0.634852  | 1.302491  | -0.766684 |                       |             |
| O                           | 2.762335  | 2.013094  | -0.907775 |                       |             |
| H                           | 2.429558  | 2.444999  | -1.711208 |                       |             |
| H                           | 4.272896  | 0.356618  | 0.323945  |                       |             |
| H                           | 3.745985  | -0.707443 | 1.639287  |                       |             |
| S                           | 3.129626  | -1.639263 | -0.460818 |                       |             |
| H                           | 2.987709  | -0.891403 | -1.574609 |                       |             |
| C                           | -3.194956 | -0.196049 | 0.532201  |                       |             |
| C                           | -2.151485 | -1.292489 | 0.811850  |                       |             |
| N                           | -4.211297 | -0.660065 | -0.397194 |                       |             |
| H                           | -3.781583 | -0.861870 | -1.296452 |                       |             |
| H                           | -4.892853 | 0.073575  | -0.564414 |                       |             |
| H                           | -3.671078 | 0.030853  | 1.492754  |                       |             |
| C                           | -2.492796 | 1.089947  | 0.085717  |                       |             |
| O                           | -2.654202 | 1.629793  | -0.982019 |                       |             |

| Nov 11, 22 15:56            |           |           | dimers_structures.xyz | Page 57/325 |
|-----------------------------|-----------|-----------|-----------------------|-------------|
| O                           | -1.649911 | 1.550918  | 1.031460              |             |
| H                           | -1.140204 | 2.286072  | 0.653516              |             |
| H                           | -1.492285 | -0.990820 | 1.623277              |             |
| H                           | -2.674904 | -2.199732 | 1.112824              |             |
| S                           | -1.135145 | -1.782111 | -0.650717             |             |
| H                           | -0.446953 | -0.625055 | -0.764418             |             |
| 28                          |           |           |                       |             |
| Dimer 130 of the n...n type |           |           |                       |             |
| C                           | -1.810386 | 0.500769  | -0.150214             |             |
| C                           | -1.663259 | -0.840981 | -0.895356             |             |
| N                           | -1.085371 | 0.496120  | 1.108656              |             |
| H                           | -1.576103 | -0.074972 | 1.790709              |             |
| H                           | -1.030770 | 1.434191  | 1.491238              |             |
| H                           | -1.366800 | 1.253835  | -0.807684             |             |
| C                           | -3.291881 | 0.848369  | -0.002761             |             |
| O                           | -3.895488 | 0.873441  | 1.044330              |             |
| O                           | -3.861834 | 1.096143  | -1.197331             |             |
| H                           | -4.806164 | 1.279721  | -1.067773             |             |
| H                           | -2.203693 | -0.809410 | -1.840263             |             |
| H                           | -0.606675 | -0.998921 | -1.103339             |             |
| S                           | -2.196750 | -2.321167 | 0.065111              |             |
| H                           | -3.511060 | -2.022290 | 0.126748              |             |
| C                           | 2.055613  | 0.102214  | 0.923132              |             |
| C                           | 3.593519  | 0.153239  | 0.837970              |             |
| N                           | 1.550193  | -1.257634 | 0.861812              |             |
| H                           | 1.735631  | -1.654102 | -0.055430             |             |
| H                           | 0.541170  | -1.216857 | 0.977146              |             |
| H                           | 1.782495  | 0.531006  | 1.890120              |             |
| C                           | 1.476730  | 1.025037  | -0.147571             |             |
| O                           | 1.125717  | 0.671614  | -1.251006             |             |
| O                           | 1.467660  | 2.311930  | 0.251173              |             |
| H                           | 1.159660  | 2.867642  | -0.482703             |             |
| H                           | 3.942524  | 1.181122  | 0.937008              |             |
| H                           | 4.004525  | -0.435402 | 1.658586              |             |
| S                           | 4.325881  | -0.592390 | -0.684194             |             |
| H                           | 3.764970  | 0.255038  | -1.570834             |             |
| 28                          |           |           |                       |             |
| Dimer 131 of the n...n type |           |           |                       |             |
| C                           | 2.604828  | -0.758838 | 0.837741              |             |
| C                           | 2.518548  | 0.782724  | 0.832543              |             |
| N                           | 3.834012  | -1.243900 | 0.230964              |             |
| H                           | 3.848365  | -1.015945 | -0.759008             |             |
| H                           | 3.885532  | -2.255304 | 0.303183              |             |
| H                           | 2.586399  | -1.062208 | 1.887765              |             |
| C                           | 1.324441  | -1.281890 | 0.187490              |             |
| O                           | 1.208657  | -1.495064 | -1.004425             |             |
| O                           | 0.325280  | -1.400691 | 1.062258              |             |
| H                           | -0.515632 | -1.598237 | 0.586375              |             |
| H                           | 1.564128  | 1.098854  | 1.250619              |             |
| H                           | 3.329925  | 1.181274  | 1.442142              |             |
| S                           | 2.743495  | 1.587883  | -0.818505             |             |
| H                           | 1.898234  | 0.801551  | -1.513319             |             |
| C                           | -2.148831 | 1.030677  | -0.774920             |             |
| C                           | -3.137556 | -0.120815 | -0.989144             |             |
| N                           | -0.952107 | 0.868249  | -1.584052             |             |
| H                           | -0.515446 | -0.032227 | -1.407034             |             |
| H                           | -0.268279 | 1.576046  | -1.333383             |             |
| H                           | -2.667667 | 1.940006  | -1.107105             |             |
| C                           | -1.855934 | 1.284068  | 0.709019              |             |
| O                           | -0.766686 | 1.556847  | 1.153067              |             |
| O                           | -2.970143 | 1.211415  | 1.461812              |             |
| H                           | -2.745737 | 1.420480  | 2.382808              |             |
| H                           | -4.119201 | 0.132961  | -0.596370             |             |
| H                           | -3.225524 | -0.311062 | -2.058156             |             |
| S                           | -2.642281 | -1.737597 | -0.232869             |             |
| H                           | -3.057698 | -1.446823 | 1.017008              |             |
| 28                          |           |           |                       |             |
| Dimer 132 of the n...n type |           |           |                       |             |
| C                           | 3.098480  | -0.270075 | 0.710734              |             |

| Nov 11, 22 15:56            |           |           | dimers_structures.xyz | Page 58/325 |
|-----------------------------|-----------|-----------|-----------------------|-------------|
| C                           | 2.037389  | 0.766933  | 1.131713              |             |
| N                           | 4.333590  | 0.376162  | 0.301589              |             |
| H                           | 4.173359  | 0.922095  | -0.540728             |             |
| H                           | 5.035147  | -0.319905 | 0.069616              |             |
| H                           | 3.293166  | -0.885464 | 1.594343              |             |
| C                           | 2.501940  | -1.189307 | -0.356887             |             |
| O                           | 2.744472  | -1.119006 | -1.537009             |             |
| O                           | 1.627580  | -2.080474 | 0.163078              |             |
| H                           | 1.198099  | -2.543751 | -0.575943             |             |
| H                           | 1.162614  | 0.272323  | 1.546481              |             |
| H                           | 2.470911  | 1.403570  | 1.902953              |             |
| S                           | 1.510830  | 1.938861  | -0.196065             |             |
| H                           | 1.053915  | 1.015423  | -1.066273             |             |
| C                           | -2.006870 | 0.889750  | 0.169403              |             |
| C                           | -3.341719 | 0.532596  | 0.844634              |             |
| N                           | -2.211153 | 1.603882  | -1.077456             |             |
| H                           | -2.626814 | 0.983547  | -1.767016             |             |
| H                           | -1.319641 | 1.905944  | -1.456434             |             |
| H                           | -1.468433 | 1.546491  | 0.861695              |             |
| C                           | -1.130226 | -0.357732 | 0.030646              |             |
| O                           | -0.675133 | -0.773955 | -1.010587             |             |
| O                           | -0.903585 | -0.935703 | 1.223864              |             |
| H                           | -0.272447 | -1.667057 | 1.110775              |             |
| H                           | -3.171015 | 0.119985  | 1.837063              |             |
| H                           | -3.937204 | 1.440483  | 0.936552              |             |
| S                           | -4.392197 | -0.643175 | -0.118151             |             |
| H                           | -3.647478 | -1.744860 | 0.109217              |             |
| 28                          |           |           |                       |             |
| Dimer 133 of the n...n type |           |           |                       |             |
| C                           | -2.005101 | 0.888846  | 0.168563              |             |
| C                           | -3.339176 | 0.533167  | 0.845687              |             |
| N                           | -2.210121 | 1.604189  | -1.077516             |             |
| H                           | -2.628064 | 0.985090  | -1.766811             |             |
| H                           | -1.318600 | 1.904695  | -1.457713             |             |
| H                           | -1.464411 | 1.544345  | 0.860306              |             |
| C                           | -1.129811 | -0.359444 | 0.027577              |             |
| O                           | -0.672913 | -0.772684 | -1.014001             |             |
| O                           | -0.906042 | -0.941350 | 1.219478              |             |
| H                           | -0.274531 | -1.672250 | 1.105486              |             |
| H                           | -3.167356 | 0.120420  | 1.837879              |             |
| H                           | -3.933705 | 1.441599  | 0.938523              |             |
| S                           | -4.391983 | -0.641604 | -0.115664             |             |
| H                           | -3.648058 | -1.743976 | 0.110909              |             |
| C                           | 3.095832  | -0.270476 | 0.712652              |             |
| C                           | 2.033692  | 0.766011  | 1.132190              |             |
| N                           | 4.331936  | 0.376204  | 0.307133              |             |
| H                           | 4.173926  | 0.922491  | -0.535360             |             |
| H                           | 5.034279  | -0.319629 | 0.076870              |             |
| H                           | 3.288489  | -0.886805 | 1.596046              |             |
| C                           | 2.501888  | -1.188600 | -0.357313             |             |
| O                           | 2.745980  | -1.116182 | -1.536966             |             |
| O                           | 1.627636  | -2.081457 | 0.160043              |             |
| H                           | 1.199923  | -2.544217 | -0.580307             |             |
| H                           | 1.157641  | 0.270665  | 1.543367              |             |
| H                           | 2.464881  | 1.401385  | 1.905766              |             |
| S                           | 1.511081  | 1.939863  | -0.195513             |             |
| H                           | 1.056074  | 1.017646  | -1.068015             |             |
| 28                          |           |           |                       |             |
| Dimer 134 of the n...n type |           |           |                       |             |
| C                           | 1.897362  | -0.317438 | 0.032497              |             |
| C                           | 2.003851  | 1.076999  | -0.604653             |             |
| N                           | 1.530880  | -0.234319 | 1.435225              |             |
| H                           | 2.293264  | 0.176262  | 1.967109              |             |
| H                           | 1.377851  | -1.164277 | 1.811477              |             |
| H                           | 1.098908  | -0.845419 | -0.500729             |             |
| C                           | 3.167525  | -1.134368 | -0.223649             |             |
| O                           | 3.821295  | -1.682343 | 0.631673              |             |
| O                           | 3.475096  | -1.175511 | -1.535036             |             |
| H                           | 4.279149  | -1.705515 | -1.656050             |             |

| Nov 11, 22 15:56            |           |           |           | dimers_structures.xyz | Page 59/325 |
|-----------------------------|-----------|-----------|-----------|-----------------------|-------------|
| H                           | 2.138168  | 0.998247  | -1.681516 |                       |             |
| H                           | 1.083648  | 1.624520  | -0.405011 |                       |             |
| S                           | 3.352521  | 2.130292  | 0.090483  |                       |             |
| H                           | 4.379840  | 1.467370  | -0.479641 |                       |             |
| C                           | -2.819181 | 0.885366  | 0.302766  |                       |             |
| C                           | -1.479090 | 0.166438  | 0.087067  |                       |             |
| N                           | -3.199392 | 0.888155  | 1.706000  |                       |             |
| H                           | -3.343888 | -0.068177 | 2.020537  |                       |             |
| H                           | -4.088374 | 1.363805  | 1.825017  |                       |             |
| H                           | -2.667366 | 1.921769  | -0.021801 |                       |             |
| C                           | -3.897758 | 0.314731  | -0.625042 |                       |             |
| O                           | -4.972645 | -0.101186 | -0.262737 |                       |             |
| O                           | -3.503650 | 0.332235  | -1.913673 |                       |             |
| H                           | -4.213742 | -0.029770 | -2.467532 |                       |             |
| H                           | -1.136901 | 0.295317  | -0.938132 |                       |             |
| H                           | -0.735487 | 0.578670  | 0.767463  |                       |             |
| S                           | -1.500392 | -1.636130 | 0.483492  |                       |             |
| H                           | -2.216557 | -2.032168 | -0.589102 |                       |             |
| 28                          |           |           |           |                       |             |
| Dimer 135 of the n...n type |           |           |           |                       |             |
| C                           | 1.557859  | -0.116110 | 0.587192  |                       |             |
| C                           | 2.988225  | 0.066663  | 1.116795  |                       |             |
| N                           | 1.192942  | -1.518378 | 0.497572  |                       |             |
| H                           | 1.829079  | -1.992587 | -0.138402 |                       |             |
| H                           | 0.263307  | -1.621897 | 0.098698  |                       |             |
| H                           | 0.897466  | 0.379124  | 1.308814  |                       |             |
| C                           | 1.347930  | 0.662530  | -0.715978 |                       |             |
| O                           | 0.871270  | 0.207685  | -1.728167 |                       |             |
| O                           | 1.737399  | 1.947843  | -0.594448 |                       |             |
| H                           | 1.565048  | 2.411017  | -1.429741 |                       |             |
| H                           | 3.188450  | 1.114349  | 1.330848  |                       |             |
| H                           | 3.094901  | -0.508937 | 2.035987  |                       |             |
| S                           | 4.304056  | -0.569439 | -0.013681 |                       |             |
| H                           | 4.197329  | 0.406985  | -0.938355 |                       |             |
| C                           | -2.947190 | -0.577282 | 0.719010  |                       |             |
| C                           | -3.136791 | 0.946051  | 0.712223  |                       |             |
| N                           | -2.109052 | -1.009649 | 1.825705  |                       |             |
| H                           | -1.197932 | -0.564186 | 1.766947  |                       |             |
| H                           | -1.943530 | -2.009653 | 1.771982  |                       |             |
| H                           | -3.946890 | -1.011011 | 0.851518  |                       |             |
| C                           | -2.478908 | -1.100185 | -0.644904 |                       |             |
| O                           | -1.614653 | -1.932544 | -0.797941 |                       |             |
| O                           | -3.164128 | -0.552552 | -1.662604 |                       |             |
| H                           | -2.854371 | -0.938069 | -2.498126 |                       |             |
| H                           | -3.878330 | 1.236766  | -0.028458 |                       |             |
| H                           | -3.481338 | 1.259663  | 1.697405  |                       |             |
| S                           | -1.586947 | 1.903445  | 0.413742  |                       |             |
| H                           | -1.420019 | 1.537067  | -0.873767 |                       |             |
| 28                          |           |           |           |                       |             |
| Dimer 136 of the n...n type |           |           |           |                       |             |
| C                           | -2.269539 | -0.653985 | -0.801116 |                       |             |
| C                           | -1.776980 | 0.797401  | -0.730508 |                       |             |
| N                           | -3.526776 | -0.755682 | -1.525123 |                       |             |
| H                           | -4.249638 | -0.245698 | -1.022921 |                       |             |
| H                           | -3.832844 | -1.723174 | -1.556986 |                       |             |
| H                           | -1.492992 | -1.202919 | -1.346986 |                       |             |
| C                           | -2.316253 | -1.292136 | 0.591614  |                       |             |
| O                           | -3.249881 | -1.916178 | 1.035702  |                       |             |
| O                           | -1.171886 | -1.086667 | 1.277922  |                       |             |
| H                           | -1.233109 | -1.524227 | 2.142005  |                       |             |
| H                           | -0.762278 | 0.830458  | -0.351397 |                       |             |
| H                           | -1.791294 | 1.220292  | -1.734562 |                       |             |
| S                           | -2.820632 | 1.916923  | 0.300814  |                       |             |
| H                           | -2.413723 | 1.439146  | 1.494927  |                       |             |
| C                           | 2.339917  | -0.356292 | -1.008883 |                       |             |
| C                           | 2.119117  | 1.163194  | -0.910931 |                       |             |
| N                           | 1.091904  | -1.089792 | -0.894897 |                       |             |
| H                           | 0.706164  | -0.987303 | 0.040126  |                       |             |
| H                           | 1.259447  | -2.082815 | -1.022184 |                       |             |

| Nov 11, 22 15:56            |           |           |           | dimers_structures.xyz | Page 60/325 |
|-----------------------------|-----------|-----------|-----------|-----------------------|-------------|
| H                           | 2.763778  | -0.538546 | -2.003555 |                       |             |
| C                           | 3.412311  | -0.811203 | -0.012006 |                       |             |
| O                           | 3.269241  | -1.690833 | 0.803407  |                       |             |
| O                           | 4.551295  | -0.104238 | -0.150394 |                       |             |
| H                           | 5.203376  | -0.423739 | 0.493687  |                       |             |
| H                           | 3.028654  | 1.698620  | -1.175163 |                       |             |
| H                           | 1.329872  | 1.444664  | -1.607898 |                       |             |
| S                           | 1.544667  | 1.756617  | 0.742312  |                       |             |
| H                           | 2.702511  | 1.538376  | 1.398907  |                       |             |
| 28                          |           |           |           |                       |             |
| Dimer 137 of the n...n type |           |           |           |                       |             |
| C                           | -1.962439 | 0.262344  | 0.824682  |                       |             |
| C                           | -1.669604 | -0.939205 | -0.089492 |                       |             |
| N                           | -2.807228 | -0.116815 | 1.943532  |                       |             |
| H                           | -3.722785 | -0.398659 | 1.602773  |                       |             |
| H                           | -2.959525 | 0.681161  | 2.552043  |                       |             |
| H                           | -0.991292 | 0.587975  | 1.212445  |                       |             |
| C                           | -2.509810 | 1.434250  | 0.006625  |                       |             |
| O                           | -3.557793 | 1.997827  | 0.204925  |                       |             |
| O                           | -1.660443 | 1.773703  | -0.989081 |                       |             |
| H                           | -2.022154 | 2.526326  | -1.483745 |                       |             |
| H                           | -0.947330 | -0.672391 | -0.858233 |                       |             |
| H                           | -1.253686 | -1.739979 | 0.519736  |                       |             |
| S                           | -3.153538 | -1.663385 | -0.912765 |                       |             |
| H                           | -3.356331 | -0.657315 | -1.788386 |                       |             |
| C                           | 1.936209  | 0.066035  | -0.801094 |                       |             |
| C                           | 3.460889  | 0.020445  | -1.025769 |                       |             |
| N                           | 1.468249  | 1.421958  | -0.588776 |                       |             |
| H                           | 1.738978  | 1.743761  | 0.335665  |                       |             |
| H                           | 0.456907  | 1.475755  | -0.647978 |                       |             |
| H                           | 1.481327  | -0.325754 | -1.717220 |                       |             |
| C                           | 1.561670  | -0.904862 | 0.323181  |                       |             |
| O                           | 1.091307  | -0.580796 | 1.388599  |                       |             |
| O                           | 1.838116  | -2.178683 | -0.009645 |                       |             |
| H                           | 1.615094  | -2.758994 | 0.736031  |                       |             |
| H                           | 3.781933  | -0.987910 | -1.282236 |                       |             |
| H                           | 3.704761  | 0.690523  | -1.849669 |                       |             |
| S                           | 4.464588  | 0.626653  | 0.400120  |                       |             |
| H                           | 4.279165  | -0.443251 | 1.200612  |                       |             |
| 28                          |           |           |           |                       |             |
| Dimer 138 of the n...n type |           |           |           |                       |             |
| C                           | 2.215954  | -0.649002 | 0.556333  |                       |             |
| C                           | 1.606237  | 0.758675  | 0.647477  |                       |             |
| N                           | 3.307086  | -0.821438 | 1.500608  |                       |             |
| H                           | 4.059578  | -0.176596 | 1.272252  |                       |             |
| H                           | 3.696710  | -1.755229 | 1.417687  |                       |             |
| H                           | 1.418344  | -1.353704 | 0.820111  |                       |             |
| C                           | 2.596062  | -0.982022 | -0.890661 |                       |             |
| O                           | 3.682963  | -1.364173 | -1.252061 |                       |             |
| O                           | 1.554853  | -0.802317 | -1.728800 |                       |             |
| H                           | 1.824499  | -1.037263 | -2.630960 |                       |             |
| H                           | 0.711550  | 0.843786  | 0.035657  |                       |             |
| H                           | 1.340156  | 0.955433  | 1.685492  |                       |             |
| S                           | 2.757240  | 2.119197  | 0.163333  |                       |             |
| H                           | 2.707766  | 1.896573  | -1.166370 |                       |             |
| C                           | -2.300143 | 0.211302  | -0.852902 |                       |             |
| C                           | -1.564655 | -0.990733 | -0.235441 |                       |             |
| N                           | -1.551687 | 1.443994  | -0.669193 |                       |             |
| H                           | -1.559909 | 1.704039  | 0.313872  |                       |             |
| H                           | -2.002171 | 2.204486  | -1.168071 |                       |             |
| H                           | -2.376491 | 0.004696  | -1.926380 |                       |             |
| C                           | -3.739334 | 0.285682  | -0.331688 |                       |             |
| O                           | -4.222092 | 1.239877  | 0.230430  |                       |             |
| O                           | -4.412005 | -0.857173 | -0.568801 |                       |             |
| H                           | -5.313792 | -0.773264 | -0.219699 |                       |             |
| H                           | -2.082566 | -1.918794 | -0.468850 |                       |             |
| H                           | -0.562839 | -1.034583 | -0.658665 |                       |             |
| S                           | -1.336127 | -0.884560 | 1.594946  |                       |             |
| H                           | -2.600889 | -1.204794 | 1.936703  |                       |             |

| Nov 11, 22 15:56            | dimers_structures.xyz | Page 61/325 |
|-----------------------------|-----------------------|-------------|
| 28                          |                       |             |
| Dimer 139 of the n...n type |                       |             |
| C                           | -3.237903             | 0.123475    |
| C                           | -2.216674             | -0.985168   |
| N                           | -4.471552             | -0.427177   |
| H                           | -4.289022             | -0.871960   |
| H                           | -5.140117             | 0.316017    |
| H                           | -3.455297             | 0.619643    |
| C                           | -2.595243             | 1.186105    |
| O                           | -2.913338             | 1.415550    |
| O                           | -1.610104             | 1.844331    |
| H                           | -1.226550             | 2.504340    |
| H                           | -1.330637             | -0.561250   |
| H                           | -2.675158             | -1.686938   |
| S                           | -1.709748             | -2.012797   |
| H                           | -1.023385             | -1.048508   |
| C                           | 2.695554              | 0.311727    |
| C                           | 1.248067              | 0.136324    |
| N                           | 3.066616              | 1.715235    |
| H                           | 3.050070              | 2.117951    |
| H                           | 4.021238              | 1.807770    |
| H                           | 2.735557              | -0.110972   |
| C                           | 3.654169              | -0.538873   |
| O                           | 4.644185              | -0.121216   |
| O                           | 3.258534              | -1.825590   |
| H                           | 3.892100              | -2.330966   |
| H                           | 0.934257              | -0.901624   |
| H                           | 0.595402              | 0.763382    |
| S                           | 0.948743              | 0.687013    |
| H                           | 1.600130              | -0.326892   |
| 28                          |                       |             |
| Dimer 140 of the n...n type |                       |             |
| C                           | -2.132777             | 0.115773    |
| C                           | -3.654035             | -0.034710   |
| N                           | -1.752445             | 1.503135    |
| H                           | -2.140617             | 1.843285    |
| H                           | -0.744540             | 1.591910    |
| H                           | -1.682243             | -0.243508   |
| C                           | -1.611441             | -0.825993   |
| O                           | -0.890379             | -0.489712   |
| O                           | -2.034302             | -2.088898   |
| H                           | -1.674280             | -2.652050   |
| H                           | -3.910658             | -1.048079   |
| H                           | -3.987702             | 0.659941    |
| S                           | -4.625835             | 0.400992    |
| H                           | -4.302910             | -0.698308   |
| C                           | 1.855318              | -0.387516   |
| C                           | 3.042882              | -0.208541   |
| N                           | 1.923802              | -1.647501   |
| H                           | 2.758007              | -1.663060   |
| H                           | 1.129054              | -1.717671   |
| H                           | 0.958548              | -0.384632   |
| C                           | 1.755314              | 0.834460    |
| O                           | 2.035836              | 0.851987    |
| O                           | 1.350056              | 1.926838    |
| H                           | 1.332996              | 2.690324    |
| H                           | 2.917659              | 0.700413    |
| H                           | 3.068995              | -1.063040   |
| S                           | 4.705824              | -0.186671   |
| H                           | 4.577112              | 1.003343    |
| 28                          |                       |             |
| Dimer 141 of the n...n type |                       |             |
| C                           | -1.641878             | -0.341392   |
| C                           | -2.979570             | 0.234363    |
| N                           | -1.671475             | -1.790654   |
| H                           | -2.327196             | -2.087352   |
| H                           | -0.760306             | -2.150416   |
| H                           | -0.885711             | -0.046668   |
| C                           | -1.212594             | 0.332351    |

| Nov 11, 22 15:56            | dimers_structures.xyz | Page 62/325 |
|-----------------------------|-----------------------|-------------|
| O                           | -0.917705             | -0.246871   |
| O                           | -1.163435             | 1.678492    |
| H                           | -0.777129             | 2.051662    |
| H                           | -2.895724             | 1.304578    |
| H                           | -3.244290             | -0.259919   |
| S                           | -4.401060             | -0.073384   |
| H                           | -4.051514             | 0.829721    |
| C                           | 3.093733              | 0.403993    |
| C                           | 2.531376              | -0.999804   |
| N                           | 4.233073              | 0.347029    |
| H                           | 3.941715              | 0.007278    |
| H                           | 4.617072              | 1.276044    |
| H                           | 3.418620              | 0.817137    |
| C                           | 1.944612              | 1.285692    |
| O                           | 1.769232              | 1.613989    |
| O                           | 1.105215              | 1.607035    |
| H                           | 0.344584              | 2.093014    |
| H                           | 1.697919              | -0.921937   |
| H                           | 3.317772              | -1.598029   |
| S                           | 2.010724              | -1.979248   |
| H                           | 1.157856              | -1.080012   |
| 28                          |                       |             |
| Dimer 142 of the n...n type |                       |             |
| C                           | -2.914843             | -0.526383   |
| C                           | -1.518699             | -0.700233   |
| N                           | -3.834231             | -1.554260   |
| H                           | -3.977566             | -1.458427   |
| H                           | -4.744418             | -1.427445   |
| H                           | -2.785863             | -0.629197   |
| C                           | -3.425164             | 0.901397    |
| O                           | -4.467120             | 1.186268    |
| O                           | -2.561663             | 1.817170    |
| H                           | -2.917564             | 2.705364    |
| H                           | -0.811008             | -0.001208   |
| H                           | -1.181633             | -1.719812   |
| S                           | -1.459027             | -0.487032   |
| H                           | -1.602184             | 0.854266    |
| C                           | 2.379668              | 0.887093    |
| C                           | 2.074115              | -0.403185   |
| N                           | 1.237368              | 1.315620    |
| H                           | 1.035365              | 0.627071    |
| H                           | 1.451833              | 2.180897    |
| H                           | 2.595720              | 1.656692    |
| C                           | 3.667470              | 0.735891    |
| O                           | 3.768422              | 0.977830    |
| O                           | 4.691754              | 0.300197    |
| H                           | 5.487384              | 0.228449    |
| H                           | 2.872471              | -0.623496   |
| H                           | 1.146553              | -0.266731   |
| S                           | 1.801877              | -1.887444   |
| H                           | 3.096928              | -2.083534   |
| 28                          |                       |             |
| Dimer 143 of the n...n type |                       |             |
| C                           | 1.895990              | 0.317060    |
| C                           | 2.003612              | -1.077114   |
| N                           | 1.533031              | 0.233069    |
| H                           | 2.297720              | -0.175386   |
| H                           | 1.378146              | 1.162623    |
| H                           | 1.095410              | 0.843814    |
| C                           | 3.164119              | 1.136263    |
| O                           | 3.819099              | 1.685205    |
| O                           | 3.468367              | 1.178002    |
| H                           | 4.271319              | 1.709219    |
| H                           | 2.135661              | -0.998012   |
| H                           | 1.084802              | -1.626333   |
| S                           | 3.355512              | -2.128084   |
| H                           | 4.380535              | -1.463511   |
| C                           | -2.818003             | -0.890397   |
| C                           | -1.478263             | -0.166905   |



| Nov 11, 22 15:56            |           |           | dimers_structures.xyz | Page 63/325 |
|-----------------------------|-----------|-----------|-----------------------|-------------|
| N                           | -3.202309 | -0.913968 | -1.692045             |             |
| H                           | -3.348499 | 0.037485  | -2.020231             |             |
| H                           | -4.091273 | -1.391981 | -1.801441             |             |
| H                           | -2.664046 | -1.921868 | 0.048887              |             |
| C                           | -3.894684 | -0.307865 | 0.632514              |             |
| O                           | -4.971048 | 0.101613  | 0.267283              |             |
| O                           | -3.497082 | -0.306719 | 1.920161              |             |
| H                           | -4.206139 | 0.062186  | 2.470786              |             |
| H                           | -1.133456 | -0.280884 | 0.937758              |             |
| H                           | -0.735965 | -0.587929 | -0.764690             |             |
| S                           | -1.502304 | 1.629727  | -0.510688             |             |
| H                           | -2.221899 | 2.039529  | 0.554393              |             |
| 28                          |           |           |                       |             |
| Dimer 144 of the n...n type |           |           |                       |             |
| C                           | 1.979053  | -0.484059 | 0.597717              |             |
| C                           | 1.579665  | 0.993617  | 0.459128              |             |
| N                           | 2.963120  | -0.674087 | 1.649200              |             |
| H                           | 3.823382  | -0.190818 | 1.403305              |             |
| H                           | 3.200475  | -1.657699 | 1.731187              |             |
| H                           | 1.066371  | -1.019938 | 0.877065              |             |
| C                           | 2.404022  | -1.057858 | -0.757675             |             |
| O                           | 3.451115  | -1.616323 | -0.979022             |             |
| O                           | 1.449881  | -0.866861 | -1.692766             |             |
| H                           | 1.740443  | -1.252975 | -2.534443             |             |
| H                           | 0.764608  | 1.105739  | -0.250001             |             |
| H                           | 1.243694  | 1.354894  | 1.429267              |             |
| S                           | 2.956564  | 2.113234  | -0.047745             |             |
| H                           | 3.035861  | 1.696940  | -1.328643             |             |
| C                           | -1.784811 | -0.563037 | -0.517423             |             |
| C                           | -2.128617 | 0.912121  | -0.784331             |             |
| N                           | -2.594582 | -1.453318 | -1.331351             |             |
| H                           | -3.572060 | -1.368456 | -1.064361             |             |
| H                           | -2.332631 | -2.418600 | -1.158032             |             |
| H                           | -0.736860 | -0.693848 | -0.806778             |             |
| C                           | -1.850893 | -0.867923 | 0.982363              |             |
| O                           | -2.504022 | -1.750608 | 1.484049              |             |
| O                           | -1.070030 | -0.025161 | 1.690017              |             |
| H                           | -1.123197 | -0.253064 | 2.631988              |             |
| H                           | -1.438452 | 1.571548  | -0.262668             |             |
| H                           | -2.053071 | 1.098293  | -1.855293             |             |
| S                           | -3.852417 | 1.388917  | -0.323940             |             |
| H                           | -3.670750 | 1.359860  | 1.012538              |             |
| 28                          |           |           |                       |             |
| Dimer 145 of the n...n type |           |           |                       |             |
| C                           | -2.056704 | -0.439331 | -0.653350             |             |
| C                           | -3.507010 | -0.041188 | -0.980831             |             |
| N                           | -1.988352 | -1.741240 | -0.015260             |             |
| H                           | -2.439929 | -1.700174 | 0.894517              |             |
| H                           | -1.017477 | -1.984872 | 0.150548              |             |
| H                           | -1.524629 | -0.485959 | -1.607983             |             |
| C                           | -1.381377 | 0.672592  | 0.150900              |             |
| O                           | -0.979383 | 0.564444  | 1.285265              |             |
| O                           | -1.292084 | 1.815080  | -0.558573             |             |
| H                           | -0.904926 | 2.507879  | 0.000507              |             |
| H                           | -3.527600 | 0.880394  | -1.559946             |             |
| H                           | -3.959159 | -0.838890 | -1.569993             |             |
| S                           | -4.606480 | 0.152452  | 0.490828              |             |
| H                           | -4.067212 | 1.301996  | 0.946282              |             |
| C                           | 2.109191  | -0.355447 | 0.880181              |             |
| C                           | 2.127801  | 1.089122  | 0.347755              |             |
| N                           | 3.210621  | -0.602435 | 1.793998              |             |
| H                           | 4.093315  | -0.550978 | 1.292404              |             |
| H                           | 3.147388  | -1.541924 | 2.172941              |             |
| H                           | 1.164465  | -0.463904 | 1.420799              |             |
| C                           | 2.046219  | -1.333205 | -0.294315             |             |
| O                           | 2.889463  | -2.150708 | -0.571498             |             |
| O                           | 0.913120  | -1.162195 | -1.012402             |             |
| H                           | 0.917262  | -1.774196 | -1.766027             |             |
| H                           | 1.257346  | 1.277028  | -0.274872             |             |

| Nov 11, 22 15:56            |           |           | dimers_structures.xyz | Page 64/325 |
|-----------------------------|-----------|-----------|-----------------------|-------------|
| H                           | 2.107914  | 1.772226  | 1.196214              |             |
| S                           | 3.641380  | 1.541559  | -0.608395             |             |
| H                           | 3.361314  | 0.814695  | -1.709876             |             |
| 28                          |           |           |                       |             |
| Dimer 146 of the n...n type |           |           |                       |             |
| C                           | -2.926445 | -0.619245 | 0.459010              |             |
| C                           | -3.403915 | 0.825211  | 0.235421              |             |
| N                           | -2.180624 | -0.748094 | 1.697974              |             |
| H                           | -1.327355 | -0.197852 | 1.650896              |             |
| H                           | -1.876904 | -1.708738 | 1.822326              |             |
| H                           | -3.830602 | -1.236232 | 0.522944              |             |
| C                           | -2.165561 | -1.122584 | -0.772322             |             |
| O                           | -1.036469 | -1.553184 | -0.757600             |             |
| O                           | -2.906331 | -1.021537 | -1.892149             |             |
| H                           | -2.388647 | -1.348099 | -2.645592             |             |
| H                           | -4.081684 | 0.879182  | -0.614086             |             |
| H                           | -3.929384 | 1.160318  | 1.129422              |             |
| S                           | -2.042305 | 2.047847  | -0.013083             |             |
| H                           | -1.693479 | 1.655050  | -1.255455             |             |
| C                           | 1.487578  | 0.399794  | -0.278090             |             |
| C                           | 2.697811  | 0.202687  | -1.197275             |             |
| N                           | 1.433284  | 1.755230  | 0.249490              |             |
| H                           | 2.228280  | 1.916176  | 0.862512              |             |
| H                           | 0.596103  | 1.869527  | 0.812157              |             |
| H                           | 0.593978  | 0.233753  | -0.890644             |             |
| C                           | 1.385478  | -0.676596 | 0.809013              |             |
| O                           | 0.929116  | -0.479716 | 1.912827              |             |
| O                           | 1.837517  | -1.875928 | 0.404980              |             |
| H                           | 1.686498  | -2.522079 | 1.113119              |             |
| H                           | 2.649465  | -0.760149 | -1.701342             |             |
| H                           | 2.697270  | 0.993226  | -1.947199             |             |
| S                           | 4.331331  | 0.341387  | -0.343100             |             |
| H                           | 4.243105  | -0.824451 | 0.328610              |             |
| 28                          |           |           |                       |             |
| Dimer 147 of the n...n type |           |           |                       |             |
| C                           | -3.009376 | 0.333267  | -0.715351             |             |
| C                           | -3.412864 | -1.093335 | -0.313997             |             |
| N                           | -2.105634 | 0.330884  | -1.853877             |             |
| H                           | -1.301012 | -0.255497 | -1.652503             |             |
| H                           | -1.732356 | 1.262208  | -2.008557             |             |
| H                           | -3.935865 | 0.847714  | -1.001803             |             |
| C                           | -2.478526 | 1.124275  | 0.487221              |             |
| O                           | -1.471313 | 1.792058  | 0.480671              |             |
| O                           | -3.283290 | 1.007623  | 1.560051              |             |
| H                           | -2.924186 | 1.544087  | 2.285021              |             |
| H                           | -4.210093 | -1.073526 | 0.425553              |             |
| H                           | -3.767662 | -1.618666 | -1.200603             |             |
| S                           | -2.020357 | -2.119553 | 0.337206              |             |
| H                           | -1.898159 | -1.479799 | 1.518439              |             |
| C                           | 2.204475  | -0.274702 | 0.869705              |             |
| C                           | 1.120079  | -0.169952 | -0.213554             |             |
| N                           | 2.167496  | 0.867641  | 1.767917              |             |
| H                           | 2.351237  | 1.718544  | 1.242101              |             |
| H                           | 2.908941  | 0.793325  | 2.457501              |             |
| H                           | 1.974972  | -1.180554 | 1.443934              |             |
| C                           | 3.580294  | -0.520897 | 0.242016              |             |
| O                           | 4.565187  | 0.148196  | 0.447614              |             |
| O                           | 3.566796  | -1.590499 | -0.577574             |             |
| H                           | 4.454825  | -1.717053 | -0.948272             |             |
| H                           | 1.050352  | -1.097495 | -0.777391             |             |
| H                           | 0.167178  | 0.017976  | 0.272002              |             |
| S                           | 1.332249  | 1.236230  | -1.388821             |             |
| H                           | 2.395007  | 0.731260  | -2.050185             |             |
| 28                          |           |           |                       |             |
| Dimer 148 of the n...n type |           |           |                       |             |
| C                           | 2.825864  | 0.732205  | -0.722135             |             |
| C                           | 2.113797  | -0.533574 | -1.241783             |             |
| N                           | 4.234029  | 0.485769  | -0.459131             |             |
| H                           | 4.329447  | -0.181709 | 0.301355              |             |

| Nov 11, 22 15:56            |           |           |           | dimers_structures.xyz | Page 65/325 |
|-----------------------------|-----------|-----------|-----------|-----------------------|-------------|
| H                           | 4.691087  | 1.340782  | -0.157866 |                       |             |
| H                           | 2.737105  | 1.480096  | -1.515755 |                       |             |
| C                           | 2.050990  | 1.259227  | 0.486130  |                       |             |
| O                           | 2.364523  | 1.072711  | 1.638730  |                       |             |
| O                           | 0.933721  | 1.916301  | 0.118770  |                       |             |
| H                           | 0.404681  | 2.100630  | 0.913053  |                       |             |
| H                           | 1.077386  | -0.314891 | -1.498115 |                       |             |
| H                           | 2.634417  | -0.876436 | -2.136506 |                       |             |
| S                           | 2.157910  | -1.986048 | -0.099827 |                       |             |
| H                           | 1.530214  | -1.409626 | 0.945564  |                       |             |
| C                           | -2.279248 | -0.477593 | -0.945832 |                       |             |
| C                           | -1.681129 | -1.328282 | 0.186123  |                       |             |
| N                           | -1.259796 | 0.308600  | -1.618085 |                       |             |
| H                           | -0.855559 | 0.984959  | -0.976262 |                       |             |
| H                           | -1.672966 | 0.843961  | -2.374912 |                       |             |
| H                           | -2.707401 | -1.184250 | -1.667081 |                       |             |
| C                           | -3.459603 | 0.355494  | -0.433582 |                       |             |
| O                           | -3.578695 | 1.548528  | -0.579752 |                       |             |
| O                           | -4.365538 | -0.409632 | 0.206809  |                       |             |
| H                           | -5.099262 | 0.150491  | 0.506856  |                       |             |
| H                           | -2.404552 | -2.059428 | 0.540563  |                       |             |
| H                           | -0.805820 | -1.852434 | -0.196903 |                       |             |
| S                           | -1.073569 | -0.362524 | 1.640245  |                       |             |
| H                           | -2.283976 | -0.073708 | 2.159856  |                       |             |
| 28                          |           |           |           |                       |             |
| Dimer 149 of the n...n type |           |           |           |                       |             |
| C                           | -1.665153 | -0.156310 | -0.364993 |                       |             |
| C                           | -2.871695 | -0.775472 | -1.083643 |                       |             |
| N                           | -1.083311 | -1.081293 | 0.593193  |                       |             |
| H                           | -1.780890 | -1.335512 | 1.287878  |                       |             |
| H                           | -0.330368 | -0.623060 | 1.094757  |                       |             |
| H                           | -0.916883 | 0.061506  | -1.136212 |                       |             |
| C                           | -2.002903 | 1.214802  | 0.233070  |                       |             |
| O                           | -1.679395 | 1.584053  | 1.338829  |                       |             |
| O                           | -2.680078 | 1.988894  | -0.634013 |                       |             |
| H                           | -2.838715 | 2.856256  | -0.227719 |                       |             |
| H                           | -3.193220 | -0.145406 | -1.909958 |                       |             |
| H                           | -2.580666 | -1.749688 | -1.475939 |                       |             |
| S                           | -4.322828 | -1.101686 | 0.012831  |                       |             |
| H                           | -4.688022 | 0.187639  | 0.167118  |                       |             |
| C                           | 2.749456  | 0.219533  | -1.010142 |                       |             |
| C                           | 2.183176  | -1.183989 | -0.738766 |                       |             |
| N                           | 4.186117  | 0.178942  | -1.229018 |                       |             |
| H                           | 4.649121  | -0.147533 | -0.384317 |                       |             |
| H                           | 4.538864  | 1.114894  | -1.403189 |                       |             |
| H                           | 2.265142  | 0.575946  | -1.927602 |                       |             |
| C                           | 2.325172  | 1.206976  | 0.083954  |                       |             |
| O                           | 3.070987  | 1.945664  | 0.679612  |                       |             |
| O                           | 0.996329  | 1.156663  | 0.300928  |                       |             |
| H                           | 0.735979  | 1.792014  | 0.988044  |                       |             |
| H                           | 1.095975  | -1.182180 | -0.751089 |                       |             |
| H                           | 2.540770  | -1.856430 | -1.518240 |                       |             |
| S                           | 2.746859  | -1.938509 | 0.848407  |                       |             |
| H                           | 2.027724  | -1.144303 | 1.667707  |                       |             |
| 28                          |           |           |           |                       |             |
| Dimer 150 of the n...n type |           |           |           |                       |             |
| C                           | 3.142154  | -0.669183 | -0.626780 |                       |             |
| C                           | 1.634916  | -0.566740 | -0.351590 |                       |             |
| N                           | 3.737496  | -1.796914 | 0.070785  |                       |             |
| H                           | 3.663095  | -1.654291 | 1.074895  |                       |             |
| H                           | 4.729997  | -1.849849 | -0.136129 |                       |             |
| C                           | 3.246807  | -0.830949 | -1.706451 |                       |             |
| C                           | 3.839351  | 0.667298  | -0.341888 |                       |             |
| O                           | 4.818481  | 0.800288  | 0.352806  |                       |             |
| O                           | 3.227708  | 1.691131  | -0.968780 |                       |             |
| H                           | 3.704191  | 2.513758  | -0.772709 |                       |             |
| H                           | 1.174382  | 0.182095  | -0.991792 |                       |             |
| H                           | 1.173341  | -1.533353 | -0.549328 |                       |             |
| S                           | 1.205428  | -0.177591 | 1.401442  |                       |             |

| Nov 11, 22 15:56            |           |           |           | dimers_structures.xyz | Page 66/325 |
|-----------------------------|-----------|-----------|-----------|-----------------------|-------------|
| H                           | 1.587786  | 1.115681  | 1.370345  |                       |             |
| C                           | -2.317792 | -0.236479 | 0.745491  |                       |             |
| C                           | -3.765098 | -0.727677 | 0.562174  |                       |             |
| N                           | -2.261019 | 1.007012  | 1.491912  |                       |             |
| H                           | -2.694136 | 1.750496  | 0.950553  |                       |             |
| H                           | -1.289555 | 1.271644  | 1.626014  |                       |             |
| H                           | -1.796307 | -1.012025 | 1.314093  |                       |             |
| C                           | -1.623279 | -0.166313 | -0.615333 |                       |             |
| O                           | -1.268453 | 0.849919  | -1.164509 |                       |             |
| O                           | -1.465846 | -1.392033 | -1.153029 |                       |             |
| H                           | -1.062479 | -1.304142 | -2.031422 |                       |             |
| H                           | -3.775547 | -1.707898 | 0.088179  |                       |             |
| H                           | -4.230375 | -0.805621 | 1.544689  |                       |             |
| S                           | -4.857888 | 0.413474  | -0.394234 |                       |             |
| H                           | -4.283795 | 0.219759  | -1.599501 |                       |             |
| 28                          |           |           |           |                       |             |
| Dimer 151 of the n...n type |           |           |           |                       |             |
| C                           | -1.698213 | -0.412827 | 0.128994  |                       |             |
| C                           | -1.730808 | 1.043669  | -0.357855 |                       |             |
| N                           | -1.397302 | -1.325662 | -0.962398 |                       |             |
| H                           | -2.157106 | -1.319113 | -1.637838 |                       |             |
| H                           | -1.329384 | -2.275894 | -0.612416 |                       |             |
| H                           | -0.886727 | -0.491093 | 0.863049  |                       |             |
| C                           | -2.974235 | -0.769105 | 0.894170  |                       |             |
| O                           | -3.652523 | -1.748183 | 0.691393  |                       |             |
| O                           | -3.253020 | 0.142297  | 1.847708  |                       |             |
| H                           | -4.056345 | -0.128775 | 2.320198  |                       |             |
| H                           | -1.780509 | 1.731703  | 0.483497  |                       |             |
| H                           | -0.822478 | 1.246225  | -0.923872 |                       |             |
| S                           | -3.111919 | 1.425636  | -1.523611 |                       |             |
| H                           | -4.099800 | 1.393960  | -0.605683 |                       |             |
| C                           | 1.698185  | -0.412494 | -0.130233 |                       |             |
| C                           | 1.730792  | 1.042371  | 0.361452  |                       |             |
| N                           | 1.397617  | -1.328996 | 0.958119  |                       |             |
| H                           | 2.157606  | -1.324786 | 1.633362  |                       |             |
| H                           | 1.329484  | -2.278032 | 0.604960  |                       |             |
| H                           | 0.886591  | -0.488411 | -0.864418 |                       |             |
| C                           | 2.974192  | -0.765944 | -0.896790 |                       |             |
| O                           | 3.653000  | -1.745287 | -0.697065 |                       |             |
| O                           | 3.252288  | 0.148406  | -1.847710 |                       |             |
| H                           | 4.055694  | -0.120830 | -2.321109 |                       |             |
| H                           | 1.780407  | 1.733175  | -0.477646 |                       |             |
| H                           | 0.822521  | 1.243158  | 0.928209  |                       |             |
| S                           | 3.111953  | 1.420490  | 1.528376  |                       |             |
| H                           | 4.099860  | 1.391424  | 0.610383  |                       |             |
| 28                          |           |           |           |                       |             |
| Dimer 152 of the n...n type |           |           |           |                       |             |
| C                           | -1.831964 | -0.413006 | -0.320700 |                       |             |
| C                           | -3.140080 | -0.904218 | -0.961087 |                       |             |
| N                           | -1.428040 | -1.254146 | 0.789489  |                       |             |
| H                           | -2.125122 | -1.199622 | 1.527226  |                       |             |
| H                           | -0.542524 | -0.938402 | 1.189603  |                       |             |
| H                           | -1.067083 | -0.474748 | -1.106203 |                       |             |
| C                           | -1.913862 | 1.079035  | 0.030398  |                       |             |
| O                           | -1.545111 | 1.561052  | 1.075457  |                       |             |
| O                           | -2.417068 | 1.809225  | -0.983649 |                       |             |
| H                           | -2.417804 | 2.745811  | -0.728359 |                       |             |
| H                           | -3.346199 | -0.368500 | -1.885284 |                       |             |
| H                           | -3.039634 | -1.966428 | -1.182207 |                       |             |
| S                           | -4.615648 | -0.771369 | 0.142533  |                       |             |
| H                           | -4.741985 | 0.569597  | 0.067108  |                       |             |
| C                           | 1.874991  | -0.667262 | 0.053185  |                       |             |
| C                           | 1.669281  | 0.781302  | -0.414911 |                       |             |
| N                           | 1.554869  | -0.810440 | 1.465246  |                       |             |
| H                           | 2.122153  | -0.168657 | 2.013246  |                       |             |
| H                           | 1.789284  | -1.745318 | 1.785281  |                       |             |
| H                           | 1.177179  | -1.288357 | -0.523310 |                       |             |
| C                           | 3.268455  | -1.184762 | -0.316151 |                       |             |
| O                           | 4.014676  | -1.754575 | 0.443132  |                       |             |

| Nov 11, 22 15:56            |           |           |           | dimers_structures.xyz | Page 67/325 |
|-----------------------------|-----------|-----------|-----------|-----------------------|-------------|
| O                           | 3.559980  | -0.941566 | -1.607911 |                       |             |
| H                           | 4.438153  | -1.302610 | -1.809716 |                       |             |
| H                           | 1.702354  | 0.844831  | -1.500067 |                       |             |
| H                           | 0.697683  | 1.124456  | -0.065505 |                       |             |
| S                           | 2.869963  | 1.989429  | 0.296379  |                       |             |
| H                           | 3.935969  | 1.591480  | -0.428189 |                       |             |
| 28                          |           |           |           |                       |             |
| Dimer 153 of the n...n type |           |           |           |                       |             |
| C                           | 1.827879  | -0.878587 | -0.279310 |                       |             |
| C                           | 1.499710  | -0.045424 | 0.969937  |                       |             |
| N                           | 2.668560  | -2.017986 | 0.046836  |                       |             |
| H                           | 3.569589  | -1.692075 | 0.387330  |                       |             |
| H                           | 2.857786  | -2.562392 | -0.788772 |                       |             |
| H                           | 0.869694  | -1.250163 | -0.656035 |                       |             |
| C                           | 2.397499  | 0.015347  | -1.384428 |                       |             |
| C                           | 3.453405  | -0.157515 | -1.944686 |                       |             |
| O                           | 1.562745  | 1.036123  | -1.667902 |                       |             |
| H                           | 1.944688  | 1.576080  | -2.378016 |                       |             |
| H                           | 0.787717  | 0.740187  | 0.734652  |                       |             |
| H                           | 1.060929  | -0.700294 | 1.720893  |                       |             |
| S                           | 2.965400  | 0.728002  | 1.783762  |                       |             |
| H                           | 3.179813  | 1.678949  | 0.851065  |                       |             |
| C                           | -2.756558 | -0.299444 | -0.861891 |                       |             |
| C                           | -1.754067 | 0.863713  | -0.859299 |                       |             |
| N                           | -4.125383 | 0.176837  | -0.975516 |                       |             |
| H                           | -4.353138 | 0.751480  | -0.167888 |                       |             |
| H                           | -4.769721 | -0.607552 | -0.957783 |                       |             |
| H                           | -2.522174 | -0.905097 | -1.746167 |                       |             |
| C                           | -2.532366 | -1.231785 | 0.335476  |                       |             |
| O                           | -3.401911 | -1.627490 | 1.073503  |                       |             |
| O                           | -1.234860 | -1.575524 | 0.467042  |                       |             |
| H                           | -1.141741 | -2.188168 | 1.214164  |                       |             |
| H                           | -0.735067 | 0.503263  | -0.963693 |                       |             |
| H                           | -1.973201 | 1.512571  | -1.707135 |                       |             |
| S                           | -1.857435 | 1.961394  | 0.621711  |                       |             |
| H                           | -1.432473 | 1.053225  | 1.524004  |                       |             |
| 28                          |           |           |           |                       |             |
| Dimer 154 of the n...n type |           |           |           |                       |             |
| C                           | -2.162599 | 0.957337  | 0.257136  |                       |             |
| C                           | -1.639563 | -0.142463 | 1.192780  |                       |             |
| N                           | -3.538026 | 1.313361  | 0.558300  |                       |             |
| H                           | -4.142065 | 0.510400  | 0.402444  |                       |             |
| H                           | -3.857222 | 2.041130  | -0.073318 |                       |             |
| H                           | -1.528211 | 1.834555  | 0.436203  |                       |             |
| C                           | -1.928399 | 0.591104  | -1.214582 |                       |             |
| O                           | -2.741969 | 0.698821  | -2.097440 |                       |             |
| O                           | -0.668018 | 0.143262  | -1.411244 |                       |             |
| H                           | -0.503898 | -0.025362 | -2.353097 |                       |             |
| H                           | -0.577069 | -0.305101 | 1.041250  |                       |             |
| H                           | -1.804645 | 0.166903  | 2.224375  |                       |             |
| S                           | -2.507618 | -1.762484 | 1.028504  |                       |             |
| H                           | -2.101068 | -2.038028 | -0.227828 |                       |             |
| C                           | 3.016320  | -0.540016 | 0.413486  |                       |             |
| C                           | 2.292282  | 0.385054  | 1.409915  |                       |             |
| N                           | 4.171616  | 0.110008  | -0.179114 |                       |             |
| H                           | 3.873094  | 0.914103  | -0.724460 |                       |             |
| H                           | 4.636928  | -0.521022 | -0.823846 |                       |             |
| H                           | 3.355939  | -1.405915 | 0.992265  |                       |             |
| C                           | 2.010395  | -1.078556 | -0.609366 |                       |             |
| O                           | 2.041290  | -0.860461 | -1.797280 |                       |             |
| O                           | 1.053786  | -1.815102 | -0.012579 |                       |             |
| H                           | 0.397681  | -2.073294 | -0.678683 |                       |             |
| H                           | 1.500079  | -0.159337 | 1.921285  |                       |             |
| H                           | 3.011953  | 0.729348  | 2.152381  |                       |             |
| S                           | 1.600489  | 1.929162  | 0.668550  |                       |             |
| H                           | 0.806110  | 1.334271  | -0.244014 |                       |             |
| 28                          |           |           |           |                       |             |
| Dimer 155 of the n...n type |           |           |           |                       |             |
| C                           | 3.033553  | -0.359326 | 0.628178  |                       |             |

| Nov 11, 22 15:56            |           |           |           | dimers_structures.xyz | Page 68/325 |
|-----------------------------|-----------|-----------|-----------|-----------------------|-------------|
| C                           | 2.325801  | 0.971278  | 0.954080  |                       |             |
| N                           | 4.166354  | -0.154118 | -0.258103 |                       |             |
| H                           | 3.836809  | 0.152097  | -1.169714 |                       |             |
| H                           | 4.660923  | -1.028263 | -0.405985 |                       |             |
| H                           | 3.398224  | -0.753066 | 1.582194  |                       |             |
| C                           | 2.013724  | -1.370549 | 0.101946  |                       |             |
| O                           | 1.926966  | -1.738316 | -1.045891 |                       |             |
| O                           | 1.183043  | -1.793119 | 1.077386  |                       |             |
| H                           | 0.576759  | -2.455568 | 0.709425  |                       |             |
| H                           | 1.496389  | 0.803967  | 1.638735  |                       |             |
| H                           | 3.049518  | 1.635204  | 1.426272  |                       |             |
| S                           | 1.700366  | 1.900836  | -0.513462 |                       |             |
| H                           | 0.558819  | 1.208698  | -0.669390 |                       |             |
| C                           | -2.305976 | -0.864367 | 0.444722  |                       |             |
| C                           | -1.492919 | -0.810166 | -0.858040 |                       |             |
| N                           | -3.660629 | -1.331163 | 0.205297  |                       |             |
| H                           | -4.144292 | -0.675644 | -0.403425 |                       |             |
| H                           | -4.181789 | -1.349526 | 1.076306  |                       |             |
| H                           | -1.800455 | -1.582969 | 1.101484  |                       |             |
| C                           | -2.239404 | 0.475278  | 1.188974  |                       |             |
| O                           | -3.194045 | 1.077009  | 1.616512  |                       |             |
| O                           | -0.968903 | 0.907802  | 1.313801  |                       |             |
| H                           | -0.961919 | 1.759357  | 1.779734  |                       |             |
| H                           | -0.440343 | -0.645957 | -0.649629 |                       |             |
| H                           | -1.590345 | -1.766120 | -1.371928 |                       |             |
| S                           | -2.066415 | 0.453799  | -2.072743 |                       |             |
| H                           | -1.726744 | 1.540698  | -1.348766 |                       |             |
| 28                          |           |           |           |                       |             |
| Dimer 156 of the n...n type |           |           |           |                       |             |
| C                           | 2.523813  | -0.658150 | 0.734316  |                       |             |
| C                           | 1.630844  | 0.568049  | 0.977225  |                       |             |
| N                           | 3.886070  | -0.415720 | 1.183144  |                       |             |
| H                           | 4.289650  | 0.344414  | 0.640801  |                       |             |
| H                           | 4.463265  | -1.230621 | 0.999593  |                       |             |
| H                           | 2.097141  | -1.474145 | 1.330787  |                       |             |
| C                           | 2.441343  | -1.132979 | -0.722053 |                       |             |
| O                           | 3.395202  | -1.387947 | -1.417633 |                       |             |
| O                           | 1.166125  | -1.247899 | -1.142608 |                       |             |
| H                           | 1.160943  | -1.562517 | -2.060820 |                       |             |
| H                           | 0.585119  | 0.304097  | 0.858467  |                       |             |
| H                           | 1.785406  | 0.910206  | 2.000306  |                       |             |
| S                           | 2.019504  | 2.020523  | -0.091458 |                       |             |
| H                           | 1.480612  | 1.527136  | -1.224904 |                       |             |
| C                           | -2.511950 | -0.659206 | -0.731651 |                       |             |
| C                           | -1.618940 | 0.566796  | -0.973841 |                       |             |
| N                           | -3.868506 | -0.424755 | -1.201951 |                       |             |
| H                           | -4.281380 | 0.339710  | -0.672800 |                       |             |
| H                           | -4.446144 | -1.239273 | -1.018053 |                       |             |
| H                           | -2.075003 | -1.479796 | -1.314397 |                       |             |
| C                           | -2.449458 | -1.121919 | 0.729680  |                       |             |
| O                           | -3.412228 | -1.389951 | 1.407869  |                       |             |
| O                           | -1.181089 | -1.210785 | 1.176415  |                       |             |
| H                           | -1.188425 | -1.519958 | 2.096455  |                       |             |
| H                           | -0.574358 | 0.305087  | -0.842457 |                       |             |
| H                           | -1.763431 | 0.901612  | -2.000792 |                       |             |
| S                           | -2.019896 | 2.025369  | 0.081652  |                       |             |
| H                           | -1.488065 | 1.540224  | 1.221965  |                       |             |
| 28                          |           |           |           |                       |             |
| Dimer 157 of the n...n type |           |           |           |                       |             |
| C                           | -3.249519 | -0.279809 | -0.229150 |                       |             |
| C                           | -2.579371 | 0.764718  | -1.148398 |                       |             |
| N                           | -4.156708 | 0.336564  | 0.722133  |                       |             |
| H                           | -3.637541 | 0.909625  | 1.381065  |                       |             |
| H                           | -4.635347 | -0.376097 | 1.263847  |                       |             |
| H                           | -3.820965 | -0.940407 | -0.887329 |                       |             |
| C                           | -2.140691 | -1.122081 | 0.405037  |                       |             |
| O                           | -1.702720 | -0.950188 | 1.521171  |                       |             |
| O                           | -1.652886 | -2.025818 | -0.458012 |                       |             |
| H                           | -0.853895 | -2.448780 | -0.087256 |                       |             |

| Nov 11, 22 15:56            |           |           | dimers_structures.xyz | Page 69/325 |
|-----------------------------|-----------|-----------|-----------------------|-------------|
| H                           | -1.918266 | 0.264268  | -1.855694             |             |
| H                           | -3.356717 | 1.283332  | -1.709645             |             |
| S                           | -1.659002 | 2.116334  | -0.284667             |             |
| H                           | -0.961286 | 1.345989  | 0.570774              |             |
| C                           | 2.069447  | 0.738917  | -0.527809             |             |
| C                           | 1.021093  | -0.367057 | -0.349511             |             |
| N                           | 2.733805  | 0.641645  | -1.815019             |             |
| H                           | 3.291555  | -0.207619 | -1.851326             |             |
| H                           | 3.380840  | 1.414688  | -1.933731             |             |
| H                           | 1.514768  | 1.683763  | -0.488267             |             |
| C                           | 3.026499  | 0.755991  | 0.668901              |             |
| O                           | 4.225431  | 0.628176  | 0.599158              |             |
| O                           | 2.359758  | 0.926361  | 1.827356              |             |
| H                           | 2.992908  | 0.927508  | 2.563010              |             |
| H                           | 0.480854  | -0.233350 | 0.583409              |             |
| H                           | 0.318846  | -0.319773 | -1.179942             |             |
| S                           | 1.675394  | -2.093670 | -0.367430             |             |
| H                           | 2.180895  | -2.085544 | 0.883024              |             |
| 28                          |           |           |                       |             |
| Dimer 158 of the n...n type |           |           |                       |             |
| C                           | 3.208423  | 0.076297  | 0.930534              |             |
| C                           | 1.705224  | 0.395278  | 0.895881              |             |
| N                           | 4.003796  | 1.275606  | 1.134753              |             |
| H                           | 3.881409  | 1.903289  | 0.344015              |             |
| H                           | 4.990784  | 1.039260  | 1.160169              |             |
| H                           | 3.361777  | -0.596123 | 1.782930              |             |
| C                           | 3.614022  | -0.726341 | -0.311510             |             |
| O                           | 4.497523  | -0.417675 | -1.075499             |             |
| O                           | 2.858428  | -1.831906 | -0.455412             |             |
| H                           | 3.142427  | -2.310283 | -1.250712             |             |
| H                           | 1.121217  | -0.522824 | 0.883021              |             |
| H                           | 1.447555  | 0.970039  | 1.785176              |             |
| S                           | 1.181662  | 1.439045  | -0.533796             |             |
| H                           | 1.256130  | 0.468107  | -1.466839             |             |
| C                           | -3.263606 | -0.052664 | 0.905400              |             |
| C                           | -1.781331 | -0.464096 | 0.961097              |             |
| N                           | -4.141115 | -1.205177 | 1.020082              |             |
| H                           | -4.032268 | -1.798702 | 0.201747              |             |
| H                           | -5.111120 | -0.905861 | 1.029878              |             |
| H                           | -3.432168 | 0.605569  | 1.764748              |             |
| C                           | -3.520113 | 0.797032  | -0.343408             |             |
| O                           | -4.251137 | 0.486973  | -1.254331             |             |
| O                           | -2.811854 | 1.941507  | -0.312698             |             |
| H                           | -2.974485 | 2.439366  | -1.129749             |             |
| H                           | -1.143446 | 0.418056  | 0.963740              |             |
| H                           | -1.611099 | -1.031006 | 1.876015              |             |
| S                           | -1.239783 | -1.573033 | -0.411323             |             |
| H                           | -1.124934 | -0.612308 | -1.350522             |             |
| 28                          |           |           |                       |             |
| Dimer 159 of the n...n type |           |           |                       |             |
| C                           | 1.549512  | 0.292667  | -0.660348             |             |
| C                           | 2.040112  | -1.111622 | -0.290994             |             |
| N                           | 2.205690  | 0.794258  | -1.857566             |             |
| H                           | 3.205126  | 0.876979  | -1.687543             |             |
| H                           | 1.873553  | 1.730903  | -2.066127             |             |
| H                           | 0.479961  | 0.205742  | -0.872763             |             |
| C                           | 1.609838  | 1.266515  | 0.523074              |             |
| O                           | 1.923216  | 2.429425  | 0.435858              |             |
| O                           | 1.237023  | 0.683539  | 1.679290              |             |
| H                           | 1.229325  | 1.349881  | 2.384830              |             |
| H                           | 1.424237  | -1.545970 | 0.492372              |             |
| H                           | 1.970209  | -1.747241 | -1.172975             |             |
| S                           | 3.809896  | -1.178509 | 0.232668              |             |
| H                           | 3.632927  | -0.572124 | 1.424405              |             |
| C                           | -2.772650 | 0.039657  | 0.823458              |             |
| C                           | -1.645718 | -1.005456 | 0.891895              |             |
| N                           | -4.079058 | -0.586204 | 0.722645              |             |
| H                           | -4.146336 | -1.101938 | -0.150822             |             |
| H                           | -4.806023 | 0.121794  | 0.696402              |             |

| Nov 11, 22 15:56            |           |           | dimers_structures.xyz | Page 70/325 |
|-----------------------------|-----------|-----------|-----------------------|-------------|
| H                           | -2.722340 | 0.601866  | 1.762997              |             |
| C                           | -2.488842 | 1.058876  | -0.285803             |             |
| O                           | -3.210650 | 1.276809  | -1.228477             |             |
| O                           | -1.314513 | 1.694262  | -0.086726             |             |
| H                           | -1.175962 | 2.338291  | -0.800014             |             |
| H                           | -0.694002 | -0.520892 | 1.092783              |             |
| H                           | -1.861224 | -1.693099 | 1.709754              |             |
| S                           | -1.495568 | -2.089293 | -0.594752             |             |
| H                           | -1.159236 | -1.131844 | -1.482763             |             |
| 28                          |           |           |                       |             |
| Dimer 160 of the n...n type |           |           |                       |             |
| C                           | -2.724898 | -0.786633 | 0.510735              |             |
| C                           | -1.359446 | -0.225873 | 0.085227              |             |
| N                           | -3.140163 | -1.880742 | -0.351564             |             |
| H                           | -3.258328 | -1.537919 | -1.301765             |             |
| H                           | -4.048140 | -2.228817 | -0.059728             |             |
| H                           | -2.595707 | -1.172429 | 1.529264              |             |
| C                           | -3.765015 | 0.334265  | 0.625429              |             |
| O                           | -4.853447 | 0.322183  | 0.101731              |             |
| O                           | -3.320821 | 1.348345  | 1.393670              |             |
| H                           | -4.009817 | 2.029726  | 1.449275              |             |
| H                           | -0.991580 | 0.483796  | 0.823861              |             |
| H                           | -0.652721 | -1.048242 | -0.004914             |             |
| S                           | -1.346956 | 0.583787  | -1.573242             |             |
| H                           | -2.057191 | 1.674924  | -1.219279             |             |
| C                           | 2.196808  | -0.273743 | 0.997562              |             |
| C                           | 1.957124  | 1.094047  | 0.337384              |             |
| N                           | 3.203873  | -0.190726 | 2.042064              |             |
| H                           | 4.096332  | 0.074535  | 1.632838              |             |
| H                           | 3.344339  | -1.102861 | 2.465205              |             |
| H                           | 1.245563  | -0.569889 | 1.454629              |             |
| C                           | 2.498213  | -1.339966 | -0.062650             |             |
| O                           | 3.468941  | -2.058156 | -0.065273             |             |
| O                           | 1.536178  | -1.385266 | -1.005774             |             |
| H                           | 1.753682  | -2.074323 | -1.653643             |             |
| H                           | 1.114175  | 1.053790  | -0.347633             |             |
| H                           | 1.744244  | 1.823950  | 1.118189              |             |
| S                           | 3.414579  | 1.762017  | -0.579148             |             |
| H                           | 3.323695  | 0.931745  | -1.638522             |             |
| 28                          |           |           |                       |             |
| Dimer 161 of the n...n type |           |           |                       |             |
| C                           | 2.674516  | -0.228275 | 1.019055              |             |
| C                           | 1.926160  | 1.109877  | 0.856270              |             |
| N                           | 4.114047  | -0.026257 | 1.019542              |             |
| H                           | 4.414143  | 0.291946  | 0.101664              |             |
| H                           | 4.592391  | -0.905049 | 1.191314              |             |
| H                           | 2.375505  | -0.632984 | 1.991448              |             |
| C                           | 2.195536  | -1.225643 | -0.036669             |             |
| O                           | 2.837652  | -1.594739 | -0.989526             |             |
| O                           | 0.935666  | -1.645910 | 0.212394              |             |
| H                           | 0.654763  | -2.241625 | -0.502031             |             |
| H                           | 0.849101  | 0.970665  | 0.921943              |             |
| H                           | 2.246712  | 1.774173  | 1.658356              |             |
| S                           | 2.282773  | 2.009460  | -0.716158             |             |
| H                           | 1.360621  | 1.371423  | -1.464013             |             |
| C                           | -2.015738 | -0.904746 | 0.406928              |             |
| C                           | -3.538831 | -0.768504 | 0.209047              |             |
| N                           | -1.587035 | -0.383568 | 1.692527              |             |
| H                           | -1.690311 | 0.626805  | 1.714987              |             |
| H                           | -0.605921 | -0.597844 | 1.835645              |             |
| H                           | -1.797310 | -1.974905 | 0.375247              |             |
| C                           | -1.310232 | -0.261237 | -0.786182             |             |
| O                           | -0.922073 | 0.883390  | -0.820743             |             |
| O                           | -1.197980 | -1.114213 | -1.822985             |             |
| H                           | -0.790864 | -0.651289 | -2.573640             |             |
| H                           | -3.835855 | -1.210618 | -0.742119             |             |
| H                           | -4.037303 | -1.307983 | 1.014773              |             |
| S                           | -4.200226 | 0.950211  | 0.316815              |             |
| H                           | -3.560089 | 1.444268  | -0.762376             |             |

| Nov 11, 22 15:56            | dimers_structures.xyz | Page 71/325 |
|-----------------------------|-----------------------|-------------|
| 28                          |                       |             |
| Dimer 162 of the n...n type |                       |             |
| C 2.003201                  | -0.743709             | 0.418941    |
| C 1.934480                  | 0.707132              | 0.920608    |
| N 3.107297                  | -1.466899             | 1.027951    |
| H 3.988687                  | -1.048737             | 0.740502    |
| H 3.123488                  | -2.424618             | 0.691569    |
| H 1.062590                  | -1.211726             | 0.727348    |
| C 2.011700                  | -0.787568             | -1.112061   |
| O 2.835793                  | -1.356944             | -1.786298   |
| O 0.967397                  | -0.108689             | -1.629752   |
| H 0.995172                  | -0.164147             | -2.598310   |
| H 1.019040                  | 1.184806              | 0.584894    |
| H 1.937962                  | 0.696246              | 2.010094    |
| S 3.376728                  | 1.751981              | 0.432148    |
| H 3.044529                  | 1.877935              | -0.869283   |
| C -2.003302                 | -0.743382             | -0.419525   |
| C -1.934030                 | 0.707930              | -0.919733   |
| N -3.107500                 | -1.465578             | -1.029529   |
| H -3.988760                 | -1.046558             | -0.742910   |
| H -3.124935                 | -2.423263             | -0.693109   |
| H -1.062731                 | -1.211439             | -0.728109   |
| C -2.012188                 | -0.788673             | 1.111439    |
| O -2.837162                 | -1.357498             | 1.785045    |
| O -0.966967                 | -0.111739             | 1.629803    |
| H -0.994727                 | -0.168055             | 2.598310    |
| H -1.018564                 | 1.185000              | -0.583267   |
| H -1.937166                 | 0.698143              | -2.009233   |
| S -3.376125                 | 1.752723              | -0.430702   |
| H -3.044463                 | 1.877070              | 0.871019    |
| 28                          |                       |             |
| Dimer 163 of the n...n type |                       |             |
| C 3.096585                  | -1.069813             | -0.136602   |
| C 1.633942                  | -0.602275             | -0.199067   |
| N 3.429471                  | -1.593695             | 1.177374    |
| H 3.382638                  | -0.845183             | 1.864170    |
| H 4.387672                  | -1.928958             | 1.186827    |
| H 3.194453                  | -1.877494             | -0.871385   |
| C 4.036896                  | 0.044248              | -0.612143   |
| O 4.971729                  | 0.476130              | 0.019056    |
| O 3.694147                  | 0.492744              | -1.835586   |
| H 4.312798                  | 1.191309              | -2.102634   |
| H 1.361478                  | -0.338587             | -1.219284   |
| H 0.990390                  | -1.414733             | 0.137989    |
| S 1.245741                  | 0.829466              | 0.903310    |
| H 1.754930                  | 1.789331              | 0.105256    |
| C -1.923400                 | -0.278999             | -0.209042   |
| C -3.043922                 | -0.706730             | -1.173075   |
| N -1.685557                 | -1.282242             | 0.814441    |
| H -2.545468                 | -1.447994             | 1.331588    |
| H -1.018025                 | -0.929999             | 1.493528    |
| H -1.023784                 | -0.172967             | -0.821056   |
| C -2.216150                 | 1.113758              | 0.352183    |
| O -2.452695                 | 1.359451              | 1.511024    |
| O -2.202137                 | 2.046552              | -0.619885   |
| H -2.406056                 | 2.912130              | -0.231229   |
| H -3.127618                 | 0.005464              | -1.992042   |
| H -2.794632                 | -1.686012             | -1.581984   |
| S -4.703637                 | -0.923591             | -0.392474   |
| H -4.941901                 | 0.381110              | -0.146209   |
| 28                          |                       |             |
| Dimer 164 of the n...n type |                       |             |
| C -1.824793                 | 0.510243              | 0.038392    |
| C -3.170120                 | 0.998411              | 0.587754    |
| N -1.568785                 | 1.044583              | -1.292543   |
| H -2.337947                 | 0.794337              | -1.909902   |
| H -0.743986                 | 0.609499              | -1.693134   |
| H -1.048937                 | 0.874120              | 0.721594    |
| C -1.678812                 | -1.011806             | 0.122342    |

| Nov 11, 22 15:56            | dimers_structures.xyz | Page 72/325 |
|-----------------------------|-----------------------|-------------|
| O -1.177651                 | -1.700094             | -0.736888   |
| O -2.145154                 | -1.504792             | 1.284018    |
| H -1.982299                 | -2.461222             | 1.308216    |
| H -3.272019                 | 0.738490              | 1.638931    |
| H -3.216632                 | 2.082782              | 0.487752    |
| S -4.644228                 | 0.358406              | -0.325883   |
| H -4.545140                 | -0.914597             | 0.108731    |
| C 1.724966                  | -0.332721             | -0.134887   |
| C 1.876210                  | 1.161857              | -0.463285   |
| N 1.105606                  | -0.530533             | 1.163713    |
| H 1.711801                  | -0.164688             | 1.893094    |
| H 0.994580                  | -1.521979             | 1.349806    |
| H 1.064554                  | -0.762551             | -0.896737   |
| C 3.060573                  | -1.066086             | -0.296177   |
| O 3.563031                  | -1.777303             | 0.541118    |
| O 3.614266                  | -0.831008             | -1.501882   |
| H 4.448814                  | -1.322088             | -1.568840   |
| H 2.205715                  | 1.296352              | -1.491586   |
| H 0.912989                  | 1.655414              | -0.339919   |
| S 3.026616                  | 2.073167              | 0.657200    |
| H 4.168473                  | 1.538788              | 0.176975    |
| 28                          |                       |             |
| Dimer 165 of the n...n type |                       |             |
| C -3.444051                 | 0.564304              | 0.836848    |
| C -4.010146                 | -0.861395             | 0.872978    |
| N -4.257703                 | 1.573073              | 0.155087    |
| H -4.803063                 | 1.156017              | -0.595549   |
| H -4.892650                 | 2.040427              | 0.790756    |
| H -3.301227                 | 0.883280              | 1.875655    |
| C -2.034721                 | 0.595284              | 0.226841    |
| O -1.196621                 | -0.265461             | 0.437205    |
| O -1.792678                 | 1.648398              | -0.531660   |
| H -2.659342                 | 2.141301              | -0.546038   |
| H -3.332741                 | -1.522527             | 1.410549    |
| H -4.969624                 | -0.851304             | 1.389847    |
| S -4.360641                 | -1.576497             | -0.789762   |
| H -3.075782                 | -1.749916             | -1.161178   |
| C 3.479369                  | 0.616734              | -0.830907   |
| C 4.040253                  | -0.813908             | -0.852867   |
| N 4.446680                  | 1.553074              | -0.278761   |
| H 4.630967                  | 1.316040              | 0.693057    |
| H 4.056512                  | 2.490328              | -0.272133   |
| H 3.295181                  | 0.887429              | -1.877933   |
| C 2.104232                  | 0.661204              | -0.146426   |
| O 1.824347                  | 1.414447              | 0.762900    |
| O 1.253070                  | -0.217212             | -0.677299   |
| H 0.364357                  | -0.163152             | -0.232729   |
| H 3.369628                  | -1.482570             | -1.387637   |
| H 5.005388                  | -0.803874             | -1.359011   |
| S 4.384061                  | -1.529507             | 0.814802    |
| H 3.100283                  | -1.743159             | 1.169442    |
| 28                          |                       |             |
| Dimer 166 of the n...n type |                       |             |
| C 2.861957                  | -0.034961             | -0.850278   |
| C 1.538764                  | -0.800074             | -0.957734   |
| N 4.075693                  | -0.840466             | -0.698293   |
| H 3.890780                  | -1.678830             | -0.152585   |
| H 4.455765                  | -1.121182             | -1.594343   |
| H 2.964011                  | 0.556770              | -1.767722   |
| C 2.844291                  | 1.016299              | 0.272924    |
| O 1.866998                  | 1.672956              | 0.585576    |
| O 4.013959                  | 1.186610              | 0.863464    |
| H 4.598669                  | 0.494087              | 0.449960    |
| H 0.714524                  | -0.115246             | -1.148610   |
| H 1.600754                  | -1.494947             | -1.795411   |
| S 1.143817                  | -1.853201             | 0.503287    |
| H 0.874321                  | -0.850882             | 1.364524    |
| C -3.051564                 | 1.041895              | 0.223178    |
| C -3.214900                 | -0.276415             | 1.002501    |

| Nov 11, 22 15:56            |           |           | dimers_structures.xyz | Page 73/325 |
|-----------------------------|-----------|-----------|-----------------------|-------------|
| N                           | -3.979952 | 1.110046  | -0.893775             |             |
| H                           | -3.745022 | 0.394641  | -1.576896             |             |
| H                           | -3.889855 | 2.002217  | -1.369670             |             |
| H                           | -3.297811 | 1.842959  | 0.929206              |             |
| C                           | -1.584918 | 1.258651  | -0.166415             |             |
| O                           | -1.179428 | 1.309614  | -1.308837             |             |
| O                           | -0.796849 | 1.377385  | 0.906126              |             |
| H                           | 0.145117  | 1.512930  | 0.639532              |             |
| H                           | -2.570185 | -0.287349 | 1.879293              |             |
| H                           | -4.251440 | -0.354606 | 1.329546              |             |
| S                           | -2.906524 | -1.809130 | 0.019069              |             |
| H                           | -1.555719 | -1.795234 | 0.084272              |             |
| 28                          |           |           |                       |             |
| Dimer 167 of the n...n type |           |           |                       |             |
| C                           | -3.282856 | 0.325427  | 0.743611              |             |
| C                           | -2.467643 | -0.953658 | 0.976496              |             |
| N                           | -4.607282 | 0.142712  | 0.144780              |             |
| H                           | -4.611473 | -0.648042 | -0.495173             |             |
| H                           | -5.322549 | -0.008520 | 0.845791              |             |
| H                           | -3.415136 | 0.806279  | 1.719939              |             |
| C                           | -2.524259 | 1.371611  | -0.091026             |             |
| O                           | -1.332789 | 1.604677  | 0.013627              |             |
| O                           | -3.291775 | 2.051293  | -0.923434             |             |
| H                           | -4.191057 | 1.632756  | -0.819536             |             |
| H                           | -1.516471 | -0.727331 | 1.455345              |             |
| H                           | -3.030859 | -1.606748 | 1.642991              |             |
| S                           | -2.160908 | -1.948545 | -0.545488             |             |
| H                           | -1.134785 | -1.209253 | -1.020255             |             |
| C                           | 2.785928  | -0.935364 | 0.528130              |             |
| C                           | 3.765366  | 0.164984  | 0.970286              |             |
| N                           | 3.407765  | -1.848154 | -0.417326             |             |
| H                           | 3.634889  | -1.349208 | -1.273744             |             |
| H                           | 2.752947  | -2.578914 | -0.677764             |             |
| H                           | 2.529195  | -1.495910 | 1.434856              |             |
| C                           | 1.469909  | -0.321862 | 0.032580              |             |
| O                           | 1.010981  | -0.503314 | -1.076994             |             |
| O                           | 0.881586  | 0.427374  | 0.966567              |             |
| H                           | 0.047928  | 0.832500  | 0.613454              |             |
| H                           | 3.329978  | 0.771206  | 1.761734              |             |
| H                           | 4.672556  | -0.307009 | 1.346932              |             |
| S                           | 4.337977  | 1.279463  | -0.386175             |             |
| H                           | 3.195671  | 1.984529  | -0.518714             |             |
| 28                          |           |           |                       |             |
| Dimer 168 of the n...n type |           |           |                       |             |
| C                           | 3.086602  | 0.731095  | -0.289593             |             |
| C                           | 3.486525  | -0.742813 | -0.124128             |             |
| N                           | 3.094385  | 1.542386  | 0.930669              |             |
| H                           | 2.977795  | 0.962126  | 1.757815              |             |
| H                           | 3.948306  | 2.077758  | 1.028408              |             |
| H                           | 3.773204  | 1.177649  | -1.016359             |             |
| C                           | 1.695322  | 0.843906  | -0.930263             |             |
| O                           | 1.342778  | 0.172146  | -1.885031             |             |
| O                           | 0.903626  | 1.732988  | -0.355459             |             |
| H                           | 1.461806  | 2.096484  | 0.391419              |             |
| H                           | 3.419783  | -1.254548 | -1.082738             |             |
| H                           | 4.515712  | -0.797793 | 0.230271              |             |
| S                           | 2.488392  | -1.656965 | 1.128352              |             |
| H                           | 1.308580  | -1.620574 | 0.467713              |             |
| C                           | -3.099584 | -0.759870 | -0.392593             |             |
| C                           | -3.465447 | 0.713832  | -0.137931             |             |
| N                           | -3.482697 | -1.598572 | 0.732163              |             |
| H                           | -2.941951 | -1.333523 | 1.551749              |             |
| H                           | -3.249671 | -2.567798 | 0.539618              |             |
| H                           | -3.672559 | -1.072270 | -1.273248             |             |
| C                           | -1.618823 | -0.866131 | -0.777857             |             |
| O                           | -0.801921 | -1.512315 | -0.153093             |             |
| O                           | -1.330709 | -0.144258 | -1.860975             |             |
| H                           | -0.346778 | -0.095049 | -1.985982             |             |
| H                           | -3.321513 | 1.305069  | -1.039548             |             |

| Nov 11, 22 15:56            |           |           | dimers_structures.xyz | Page 74/325 |
|-----------------------------|-----------|-----------|-----------------------|-------------|
| H                           | -4.513168 | 0.767843  | 0.156872              |             |
| S                           | -2.532891 | 1.508687  | 1.245226              |             |
| H                           | -1.347147 | 1.611773  | 0.607589              |             |
| 28                          |           |           |                       |             |
| Dimer 169 of the n...n type |           |           |                       |             |
| C                           | 1.999992  | 0.200824  | -0.835778             |             |
| C                           | 1.448901  | -1.105970 | -0.246439             |             |
| N                           | 3.148778  | 0.062080  | -1.732976             |             |
| H                           | 3.679467  | -0.781119 | -1.529980             |             |
| H                           | 2.870969  | 0.042721  | -2.706505             |             |
| H                           | 1.174144  | 0.678472  | -1.372967             |             |
| C                           | 2.364961  | 1.207819  | 0.266952              |             |
| O                           | 1.653822  | 1.447494  | 1.229996              |             |
| O                           | 3.515196  | 1.824421  | 0.078342              |             |
| H                           | 3.861173  | 1.426106  | -0.769997             |             |
| H                           | 0.611717  | -0.901935 | 0.417720              |             |
| H                           | 1.096497  | -1.739755 | -1.060181             |             |
| S                           | 2.688105  | -2.127470 | 0.656244              |             |
| H                           | 2.828655  | -1.311120 | 1.720949              |             |
| C                           | -3.112848 | 0.865925  | 0.325629              |             |
| C                           | -3.380662 | -0.584350 | 0.766360              |             |
| N                           | -3.851668 | 1.193183  | -0.882840             |             |
| H                           | -3.509756 | 0.628768  | -1.656328             |             |
| H                           | -3.689704 | 2.161720  | -1.140208             |             |
| H                           | -3.478163 | 1.501982  | 1.139933              |             |
| C                           | -1.604418 | 1.128390  | 0.230367              |             |
| O                           | -1.028965 | 1.435595  | -0.793556             |             |
| O                           | -0.992583 | 0.969985  | 1.406729              |             |
| H                           | -0.019343 | 1.150421  | 1.318793              |             |
| H                           | -2.894847 | -0.793934 | 1.717149              |             |
| H                           | -4.455829 | -0.717441 | 0.884610              |             |
| S                           | -2.880562 | -1.873886 | -0.457360             |             |
| H                           | -1.550754 | -1.805808 | -0.249049             |             |
| 28                          |           |           |                       |             |
| Dimer 170 of the n...n type |           |           |                       |             |
| C                           | -2.103496 | 0.180174  | -0.677779             |             |
| C                           | -3.523406 | -0.160423 | -1.163717             |             |
| N                           | -1.215139 | -0.956292 | -0.468377             |             |
| H                           | -1.666158 | -1.649496 | 0.123829              |             |
| H                           | -1.014720 | -1.408772 | -1.354403             |             |
| H                           | -1.652763 | 0.806263  | -1.459931             |             |
| C                           | -2.150331 | 1.100213  | 0.555708              |             |
| O                           | -3.114415 | 1.809915  | 0.777206              |             |
| O                           | -1.094514 | 1.135812  | 1.352264              |             |
| H                           | -0.301754 | 0.549911  | 1.117374              |             |
| H                           | -4.092568 | 0.745155  | -1.365804             |             |
| H                           | -3.451577 | -0.738948 | -2.085516             |             |
| S                           | -4.486587 | -1.221950 | -0.003330             |             |
| H                           | -4.683072 | -0.273630 | 0.934451              |             |
| C                           | 1.938945  | -0.608663 | 0.109631              |             |
| C                           | 1.933892  | 0.399599  | -1.048736             |             |
| N                           | 1.336961  | -0.036355 | 1.308262              |             |
| H                           | 1.911594  | 0.733569  | 1.646386              |             |
| H                           | 1.321714  | -0.727868 | 2.053132              |             |
| H                           | 1.309099  | -1.443122 | -0.212435             |             |
| C                           | 3.333452  | -1.182356 | 0.357418              |             |
| O                           | 3.908668  | -1.173374 | 1.420137              |             |
| O                           | 3.851554  | -1.720629 | -0.762243             |             |
| H                           | 4.729965  | -2.081774 | -0.561634             |             |
| H                           | 2.299105  | -0.064930 | -1.961928             |             |
| H                           | 0.907867  | 0.725149  | -1.212299             |             |
| S                           | 2.888154  | 1.945709  | -0.732712             |             |
| H                           | 4.120763  | 1.411816  | -0.857807             |             |
| 28                          |           |           |                       |             |
| Dimer 171 of the n...n type |           |           |                       |             |
| C                           | -1.976817 | -0.177480 | -0.334488             |             |
| C                           | -2.969024 | -1.343575 | -0.248255             |             |
| N                           | -1.314976 | 0.210910  | 0.910668              |             |
| H                           | -1.914094 | 0.032766  | 1.712620              |             |

| Nov 11, 22 15:56            | dimers_structures.xyz |           |           | Page 75/325 |
|-----------------------------|-----------------------|-----------|-----------|-------------|
| H                           | -0.432360             | -0.298142 | 1.019727  |             |
| H                           | -1.199319             | -0.477537 | -1.047559 |             |
| C                           | -2.623117             | 1.068894  | -0.970005 |             |
| O                           | -3.394926             | 1.031702  | -1.903408 |             |
| O                           | -2.226895             | 2.209338  | -0.407326 |             |
| H                           | -1.639355             | 1.907402  | 0.340435  |             |
| H                           | -3.382449             | -1.562821 | -1.231295 |             |
| H                           | -2.450830             | -2.230068 | 0.117832  |             |
| S                           | -4.355601             | -1.072578 | 0.937998  |             |
| H                           | -4.996411             | -0.128424 | 0.218913  |             |
| C                           | 2.074568              | -0.468597 | -0.397600 |             |
| C                           | 2.101006              | 1.045338  | -0.119463 |             |
| N                           | 1.375146              | -1.186762 | 0.658094  |             |
| H                           | 1.910257              | -1.136498 | 1.521575  |             |
| H                           | 1.294268              | -2.171235 | 0.423635  |             |
| H                           | 1.519052              | -0.599178 | -1.333135 |             |
| C                           | 3.485360              | -1.001684 | -0.668640 |             |
| O                           | 4.029963              | -1.874569 | -0.035604 |             |
| O                           | 4.057438              | -0.374395 | -1.713388 |             |
| H                           | 4.947543              | -0.736668 | -1.850776 |             |
| H                           | 2.546183              | 1.581121  | -0.955049 |             |
| H                           | 1.076706              | 1.391916  | 0.012478  |             |
| S                           | 2.967835              | 1.526258  | 1.435851  |             |
| H                           | 4.227388              | 1.325455  | 0.996199  |             |
| 28                          |                       |           |           |             |
| Dimer 172 of the n...n type |                       |           |           |             |
| C                           | 3.438653              | -0.319661 | -0.413920 |             |
| C                           | 3.600578              | 0.891042  | 0.517910  |             |
| N                           | 3.125749              | -0.014754 | -1.814028 |             |
| H                           | 2.713225              | 0.910791  | -1.902467 |             |
| H                           | 3.944591              | -0.062545 | -2.407797 |             |
| H                           | 4.373478              | -0.887945 | -0.373983 |             |
| C                           | 2.367980              | -1.282019 | 0.133052  |             |
| O                           | 2.296504              | -1.648705 | 1.279625  |             |
| O                           | 1.507379              | -1.698606 | -0.811561 |             |
| H                           | 1.818645              | -1.227383 | -1.639287 |             |
| H                           | 3.741636              | 0.549830  | 1.542256  |             |
| H                           | 4.476952              | 1.465678  | 0.217794  |             |
| S                           | 2.199408              | 2.088320  | 0.452743  |             |
| H                           | 1.225346              | 1.246333  | 0.863505  |             |
| C                           | -3.028005             | -0.546470 | 0.879325  |             |
| C                           | -3.827650             | -0.488975 | -0.433292 |             |
| N                           | -3.407217             | 0.533405  | 1.775927  |             |
| H                           | -3.160016             | 1.426860  | 1.357867  |             |
| H                           | -2.881786             | 0.468629  | 2.642121  |             |
| H                           | -3.288512             | -1.499936 | 1.354178  |             |
| C                           | -1.522114             | -0.620746 | 0.594518  |             |
| O                           | -0.707033             | 0.162626  | 1.033134  |             |
| O                           | -1.212997             | -1.655876 | -0.193165 |             |
| H                           | -0.245980             | -1.673524 | -0.369496 |             |
| H                           | -3.632556             | -1.369074 | -1.042073 |             |
| H                           | -4.889864             | -0.456181 | -0.192185 |             |
| S                           | -3.522661             | 1.019913  | -1.453267 |             |
| H                           | -2.300306             | 0.671661  | -1.905180 |             |
| 28                          |                       |           |           |             |
| Dimer 173 of the n...n type |                       |           |           |             |
| C                           | -2.150976             | -0.280320 | 0.799376  |             |
| C                           | -3.599013             | 0.180188  | 1.036863  |             |
| N                           | -1.194991             | 0.774776  | 0.467803  |             |
| H                           | -1.567072             | 1.355235  | -0.279922 |             |
| H                           | -1.054565             | 1.381813  | 1.268937  |             |
| H                           | -1.813066             | -0.737392 | 1.738907  |             |
| C                           | -2.076444             | -1.420822 | -0.235304 |             |
| O                           | -3.073186             | -1.925991 | -0.720368 |             |
| O                           | -0.871702             | -1.860688 | -0.556863 |             |
| H                           | -0.086367             | -1.452172 | -0.037515 |             |
| H                           | -4.238610             | -0.666571 | 1.282559  |             |
| H                           | -3.611941             | 0.877688  | 1.875615  |             |
| S                           | -4.358602             | 1.112835  | -0.360980 |             |

| Nov 11, 22 15:56            | dimers_structures.xyz |           |           | Page 76/325 |
|-----------------------------|-----------------------|-----------|-----------|-------------|
| H                           | -4.443697             | 0.065934  | -1.205207 |             |
| C                           | 2.318022              | -0.658917 | -0.381682 |             |
| C                           | 1.852555              | 0.633909  | -1.067572 |             |
| N                           | 1.367140              | -1.077792 | 0.647781  |             |
| H                           | 1.200013              | -0.308069 | 1.292833  |             |
| H                           | 1.755534              | -1.842158 | 1.194210  |             |
| H                           | 2.347366              | -1.435202 | -1.155985 |             |
| C                           | 3.748718              | -0.549212 | 0.148351  |             |
| O                           | 4.092776              | -0.839456 | 1.269198  |             |
| O                           | 4.592881              | -0.108845 | -0.800671 |             |
| H                           | 5.491261              | -0.074594 | -0.434394 |             |
| H                           | 2.463375              | 0.842241  | -1.942577 |             |
| H                           | 0.815982              | 0.509888  | -1.374755 |             |
| S                           | 1.851232              | 2.116810  | 0.029652  |             |
| H                           | 3.171348              | 2.381045  | -0.061107 |             |
| 28                          |                       |           |           |             |
| Dimer 174 of the n...n type |                       |           |           |             |
| C                           | -2.151270             | -0.613109 | 0.410311  |             |
| C                           | -2.075089             | 0.868420  | 0.801668  |             |
| N                           | -1.383535             | -1.024381 | -0.764626 |             |
| H                           | -1.389877             | -0.287339 | -1.466349 |             |
| H                           | -0.411948             | -1.226141 | -0.506728 |             |
| H                           | -1.776027             | -1.185610 | 1.267774  |             |
| C                           | -3.608391             | -1.083593 | 0.243338  |             |
| O                           | -4.531432             | -0.697384 | 0.926382  |             |
| O                           | -3.757740             | -1.996334 | -0.716576 |             |
| H                           | -2.848239             | -2.068413 | -1.116615 |             |
| H                           | -2.696880             | 1.061621  | 1.674349  |             |
| H                           | -1.044475             | 1.123146  | 1.047591  |             |
| S                           | -2.549224             | 2.035377  | -0.544367 |             |
| H                           | -3.868025             | 1.751932  | -0.545166 |             |
| C                           | 2.452440              | -0.745259 | -0.542127 |             |
| C                           | 2.016531              | 0.688719  | -0.897010 |             |
| N                           | 1.459922              | -1.411980 | 0.287551  |             |
| H                           | 1.415159              | -0.963177 | 1.199270  |             |
| H                           | 1.727666              | -2.377368 | 0.452518  |             |
| H                           | 2.529625              | -1.285446 | -1.492164 |             |
| C                           | 3.858527              | -0.748426 | 0.066238  |             |
| O                           | 4.133370              | -1.142943 | 1.174448  |             |
| O                           | 4.767761              | -0.248115 | -0.791203 |             |
| H                           | 5.641482              | -0.259742 | -0.368282 |             |
| H                           | 2.728179              | 1.145842  | -1.581417 |             |
| H                           | 1.044070              | 0.648313  | -1.386327 |             |
| S                           | 1.767597              | 1.806344  | 0.548478  |             |
| H                           | 3.068472              | 1.987089  | 0.856380  |             |
| 28                          |                       |           |           |             |
| Dimer 175 of the n...n type |                       |           |           |             |
| C                           | -3.243484             | 0.337840  | 0.450426  |             |
| C                           | -2.746523             | -1.027542 | 0.956888  |             |
| N                           | -3.940161             | 0.326517  | -0.839860 |             |
| H                           | -3.703421             | -0.508320 | -1.370946 |             |
| H                           | -4.946002             | 0.364539  | -0.729769 |             |
| H                           | -3.917195             | 0.737756  | 1.215130  |             |
| C                           | -2.085697             | 1.353082  | 0.387339  |             |
| O                           | -1.304797             | 1.535607  | 1.295325  |             |
| O                           | -2.030491             | 2.038267  | -0.753971 |             |
| H                           | -2.796261             | 1.682216  | -1.282129 |             |
| H                           | -2.124971             | -0.881282 | 1.839260  |             |
| H                           | -3.602856             | -1.642682 | 1.233641  |             |
| S                           | -1.824745             | -2.023365 | -0.292238 |             |
| H                           | -0.806465             | -1.131187 | -0.529248 |             |
| C                           | 1.516568              | 0.417207  | 0.191936  |             |
| C                           | 1.925318              | -0.898359 | 0.877457  |             |
| N                           | 0.658963              | 0.169184  | -0.956239 |             |
| H                           | 1.196902              | -0.228055 | -1.721641 |             |
| H                           | 0.246373              | 1.034326  | -1.291048 |             |
| H                           | 0.934777              | 0.980563  | 0.927969  |             |
| C                           | 2.741140              | 1.272484  | -0.136441 |             |
| O                           | 3.053801              | 1.645601  | -1.242668 |             |

| Nov 11, 22 15:56            |           |           |           | dimers_structures.xyz | Page 77/325 |
|-----------------------------|-----------|-----------|-----------|-----------------------|-------------|
| O                           | 3.447554  | 1.569729  | 0.971663  |                       |             |
| H                           | 4.215858  | 2.107198  | 0.720508  |                       |             |
| H                           | 2.499175  | -0.700420 | 1.780480  |                       |             |
| H                           | 1.019958  | -1.439828 | 1.150694  |                       |             |
| S                           | 2.870475  | -2.068813 | -0.191162 |                       |             |
| H                           | 4.048375  | -1.411787 | -0.164236 |                       |             |
| 28                          |           |           |           |                       |             |
| Dimer 176 of the n...n type |           |           |           |                       |             |
| C                           | 2.687028  | 0.626573  | -0.830792 |                       |             |
| C                           | 3.580337  | -0.607366 | -1.009600 |                       |             |
| N                           | 3.328300  | 1.823158  | -0.278730 |                       |             |
| H                           | 4.082798  | 1.572432  | 0.356081  |                       |             |
| H                           | 3.706520  | 2.419036  | -1.005302 |                       |             |
| H                           | 2.282687  | 0.880845  | -1.817275 |                       |             |
| C                           | 1.446696  | 0.303586  | 0.018319  |                       |             |
| O                           | 0.819351  | -0.726751 | -0.047228 |                       |             |
| O                           | 1.098130  | 1.305711  | 0.837447  |                       |             |
| H                           | 1.803240  | 1.998036  | 0.695529  |                       |             |
| H                           | 3.005507  | -1.429557 | -1.432487 |                       |             |
| H                           | 4.394680  | -0.365128 | -1.692254 |                       |             |
| S                           | 4.399257  | -1.176911 | 0.541008  |                       |             |
| H                           | 3.289669  | -1.656408 | 1.139395  |                       |             |
| C                           | -3.648950 | 0.476208  | 0.292443  |                       |             |
| C                           | -3.496555 | -0.973148 | 0.789468  |                       |             |
| N                           | -4.432392 | 0.533846  | -0.931323 |                       |             |
| H                           | -3.936870 | 0.047098  | -1.674125 |                       |             |
| H                           | -4.532927 | 1.496599  | -1.237490 |                       |             |
| H                           | -4.188256 | 1.016147  | 1.079292  |                       |             |
| C                           | -2.269101 | 1.135771  | 0.183124  |                       |             |
| O                           | -1.796041 | 1.573230  | -0.842284 |                       |             |
| O                           | -1.632377 | 1.149774  | 1.362330  |                       |             |
| H                           | -0.700105 | 1.422125  | 1.227114  |                       |             |
| H                           | -3.028622 | -0.991793 | 1.771368  |                       |             |
| H                           | -4.486847 | -1.422186 | 0.861846  |                       |             |
| S                           | -2.546029 | -2.080622 | -0.342706 |                       |             |
| H                           | -1.323723 | -1.551195 | -0.114060 |                       |             |
| 28                          |           |           |           |                       |             |
| Dimer 177 of the n...n type |           |           |           |                       |             |
| C                           | 1.957395  | -0.526062 | 0.471966  |                       |             |
| C                           | 3.439281  | -0.510667 | 0.878941  |                       |             |
| N                           | 1.642695  | -1.358971 | -0.698533 |                       |             |
| H                           | 2.302963  | -1.174165 | -1.453738 |                       |             |
| H                           | 1.768859  | -2.338698 | -0.454739 |                       |             |
| H                           | 1.381986  | -0.927679 | 1.311280  |                       |             |
| C                           | 1.432770  | 0.907670  | 0.317605  |                       |             |
| O                           | 1.657026  | 1.764478  | 1.136714  |                       |             |
| O                           | 0.685974  | 1.186547  | -0.765428 |                       |             |
| H                           | 0.607390  | 0.401178  | -1.330636 |                       |             |
| H                           | 3.574744  | 0.081009  | 1.782214  |                       |             |
| H                           | 3.764531  | -1.531425 | 1.081032  |                       |             |
| S                           | 4.576165  | 0.111288  | -0.432866 |                       |             |
| H                           | 4.244591  | 1.414448  | -0.328328 |                       |             |
| C                           | -3.205772 | -0.960382 | -0.124420 |                       |             |
| C                           | -3.441751 | 0.326275  | -0.938585 |                       |             |
| N                           | -3.948596 | -0.935921 | 1.125341  |                       |             |
| H                           | -3.580437 | -0.203368 | 1.726610  |                       |             |
| H                           | -3.820673 | -1.810046 | 1.625580  |                       |             |
| H                           | -3.584211 | -1.783794 | -0.740033 |                       |             |
| C                           | -1.701461 | -1.201317 | 0.041942  |                       |             |
| O                           | -1.116531 | -1.159627 | 1.105122  |                       |             |
| O                           | -1.097173 | -1.435611 | -1.126590 |                       |             |
| H                           | -0.104999 | -1.502681 | -0.991815 |                       |             |
| H                           | -2.953262 | 0.259733  | -1.908934 |                       |             |
| H                           | -4.513887 | 0.445649  | -1.093258 |                       |             |
| S                           | -2.906536 | 1.885272  | -0.105552 |                       |             |
| H                           | -1.577483 | 1.729708  | -0.281443 |                       |             |
| 28                          |           |           |           |                       |             |
| Dimer 178 of the n...n type |           |           |           |                       |             |
| C                           | -2.175439 | -0.729764 | 0.040700  |                       |             |

| Nov 11, 22 15:56            |           |           |           | dimers_structures.xyz | Page 78/325 |
|-----------------------------|-----------|-----------|-----------|-----------------------|-------------|
| C                           | -3.625802 | -1.189335 | -0.155404 |                       |             |
| N                           | -1.750255 | -0.478827 | 1.418711  |                       |             |
| H                           | -2.525038 | -0.140403 | 1.984039  |                       |             |
| H                           | -1.376108 | -1.312465 | 1.855604  |                       |             |
| H                           | -1.528784 | -1.511242 | -0.375314 |                       |             |
| C                           | -1.860324 | 0.512193  | -0.811359 |                       |             |
| O                           | -2.278212 | 0.698988  | -1.928335 |                       |             |
| O                           | -1.026747 | 1.372439  | -0.205864 |                       |             |
| H                           | -0.863430 | 0.983537  | 0.697524  |                       |             |
| H                           | -3.828844 | -1.358498 | -1.211504 |                       |             |
| H                           | -3.782438 | -2.123988 | 0.383137  |                       |             |
| S                           | -4.883335 | -0.023367 | 0.522309  |                       |             |
| H                           | -4.704363 | 0.950490  | -0.393480 |                       |             |
| C                           | 3.642967  | 0.671124  | 0.067596  |                       |             |
| C                           | 3.724617  | -0.518174 | -0.906860 |                       |             |
| N                           | 4.295621  | 0.364108  | 1.329329  |                       |             |
| H                           | 3.791619  | -0.381796 | 1.802094  |                       |             |
| H                           | 4.262748  | 1.169227  | 1.946828  |                       |             |
| H                           | 4.179823  | 1.497210  | -0.412601 |                       |             |
| C                           | 2.188127  | 1.130443  | 0.212457  |                       |             |
| O                           | 1.567070  | 1.130591  | 1.252854  |                       |             |
| O                           | 1.666799  | 1.516872  | -0.961619 |                       |             |
| H                           | 0.712187  | 1.699029  | -0.836555 |                       |             |
| H                           | 3.348081  | -0.237501 | -1.888209 |                       |             |
| H                           | 4.768159  | -0.817357 | -1.001776 |                       |             |
| S                           | 2.842469  | -2.040356 | -0.344328 |                       |             |
| H                           | 1.586520  | -1.603679 | -0.572828 |                       |             |
| 28                          |           |           |           |                       |             |
| Dimer 179 of the n...n type |           |           |           |                       |             |
| C                           | -2.054628 | 0.376096  | -0.051704 |                       |             |
| C                           | -2.211336 | -0.823704 | -0.994968 |                       |             |
| N                           | -1.551832 | 0.092602  | 1.291591  |                       |             |
| H                           | -1.868412 | -0.821226 | 1.607025  |                       |             |
| H                           | -0.527086 | 0.113111  | 1.326719  |                       |             |
| H                           | -1.356496 | 1.072254  | -0.532773 |                       |             |
| C                           | -3.366401 | 1.177485  | 0.064229  |                       |             |
| O                           | -4.124518 | 1.376421  | -0.859738 |                       |             |
| O                           | -3.575420 | 1.664016  | 1.286222  |                       |             |
| H                           | -2.812589 | 1.298635  | 1.815509  |                       |             |
| H                           | -2.569836 | -0.495966 | -1.969376 |                       |             |
| H                           | -1.244756 | -1.310277 | -1.126149 |                       |             |
| S                           | -3.329728 | -2.144302 | -0.357544 |                       |             |
| H                           | -4.480553 | -1.454249 | -0.493127 |                       |             |
| C                           | 2.090905  | -0.503332 | 0.142310  |                       |             |
| C                           | 2.011932  | 0.534208  | -0.990058 |                       |             |
| N                           | 1.514764  | 0.011814  | 1.375843  |                       |             |
| H                           | 1.999181  | 0.863328  | 1.651002  |                       |             |
| H                           | 1.657300  | -0.652950 | 2.130938  |                       |             |
| H                           | 1.495791  | -1.364334 | -0.185864 |                       |             |
| C                           | 3.519721  | -1.031854 | 0.311152  |                       |             |
| O                           | 4.143280  | -1.024422 | 1.345639  |                       |             |
| O                           | 4.002072  | -1.528746 | -0.843164 |                       |             |
| H                           | 4.900895  | -1.863065 | -0.692448 |                       |             |
| H                           | 2.339321  | 0.098734  | -1.931262 |                       |             |
| H                           | 0.977205  | 0.856177  | -1.099698 |                       |             |
| S                           | 2.958141  | 2.087041  | -0.680908 |                       |             |
| H                           | 4.190430  | 1.573561  | -0.874732 |                       |             |
| 28                          |           |           |           |                       |             |
| Dimer 180 of the n...n type |           |           |           |                       |             |
| C                           | -2.071621 | -0.263930 | -0.142987 |                       |             |
| C                           | -2.350480 | 1.003536  | 0.673393  |                       |             |
| N                           | -2.134491 | -0.127171 | -1.598882 |                       |             |
| H                           | -2.823952 | 0.569826  | -1.869847 |                       |             |
| H                           | -1.231004 | 0.148193  | -1.970353 |                       |             |
| H                           | -1.058150 | -0.594029 | 0.112097  |                       |             |
| C                           | -2.977282 | -1.430865 | 0.291139  |                       |             |
| O                           | -3.298739 | -1.645407 | 1.438792  |                       |             |
| O                           | -3.353673 | -2.215642 | -0.718562 |                       |             |
| H                           | -2.976950 | -1.772038 | -1.523792 |                       |             |



| Nov 11, 22 15:56            |           |           | dimers_structures.xyz | Page 79/325 |
|-----------------------------|-----------|-----------|-----------------------|-------------|
| H                           | -2.252858 | 0.797000  | 1.737770              |             |
| H                           | -1.627723 | 1.772445  | 0.399853              |             |
| S                           | -4.001060 | 1.761236  | 0.354378              |             |
| H                           | -4.734432 | 0.797123  | 0.947438              |             |
| C                           | 3.254223  | 0.637300  | 0.805335              |             |
| C                           | 1.771710  | 0.491926  | 0.424497              |             |
| N                           | 3.808029  | 1.883109  | 0.304095              |             |
| H                           | 3.813053  | 1.874166  | -0.712621             |             |
| H                           | 4.774857  | 1.981660  | 0.596961              |             |
| H                           | 3.285903  | 0.658972  | 1.901298              |             |
| C                           | 4.053370  | -0.607263 | 0.395334              |             |
| O                           | 5.057295  | -0.596481 | -0.276442             |             |
| O                           | 3.504640  | -1.735051 | 0.887568              |             |
| H                           | 4.045002  | -2.493667 | 0.613967              |             |
| H                           | 1.333932  | -0.378253 | 0.908853              |             |
| H                           | 1.241147  | 1.384336  | 0.754753              |             |
| S                           | 1.455949  | 0.389071  | -1.392101             |             |
| H                           | 1.862487  | -0.885782 | -1.560409             |             |
| 28                          |           |           |                       |             |
| Dimer 181 of the n...n type |           |           |                       |             |
| C                           | 2.235566  | -0.438625 | 0.308064              |             |
| C                           | 1.857194  | 1.010126  | -0.019236             |             |
| N                           | 2.610872  | -0.715631 | 1.696694              |             |
| H                           | 3.086101  | 0.082784  | 2.110848              |             |
| H                           | 1.801879  | -0.932802 | 2.266600              |             |
| H                           | 1.362970  | -1.053697 | 0.061180              |             |
| C                           | 3.342954  | -0.959972 | -0.623848             |             |
| O                           | 3.425231  | -0.674991 | -1.797841             |             |
| O                           | 4.195724  | -1.794500 | -0.027887             |             |
| H                           | 3.907894  | -1.803869 | 0.921321              |             |
| H                           | 1.547687  | 1.093248  | -1.059519             |             |
| H                           | 1.025639  | 1.315322  | 0.615521              |             |
| S                           | 3.190916  | 2.238282  | 0.318132              |             |
| H                           | 4.009037  | 1.859992  | -0.685141             |             |
| C                           | -3.268274 | -0.040056 | 0.924426              |             |
| C                           | -1.769869 | -0.083938 | 0.581173              |             |
| N                           | -3.759242 | -1.352814 | 1.306419              |             |
| H                           | -3.700296 | -1.986163 | 0.513100              |             |
| H                           | -4.740123 | -1.301322 | 1.562276              |             |
| H                           | -3.364922 | 0.632039  | 1.785453              |             |
| C                           | -4.069501 | 0.617780  | -0.206394             |             |
| O                           | -5.013638 | 0.117915  | -0.770367             |             |
| O                           | -3.597477 | 1.845270  | -0.500348             |             |
| H                           | -4.134413 | 2.226498  | -1.213541             |             |
| H                           | -1.385386 | 0.919138  | 0.411404              |             |
| H                           | -1.236026 | -0.528505 | 1.420818              |             |
| S                           | -1.345930 | -1.136372 | -0.875362             |             |
| H                           | -1.708385 | -0.255544 | -1.829995             |             |
| 28                          |           |           |                       |             |
| Dimer 182 of the n...n type |           |           |                       |             |
| C                           | 2.301462  | 0.152396  | 0.668343              |             |
| C                           | 3.699910  | 0.779313  | 0.627073              |             |
| N                           | 2.200212  | -1.168359 | 1.295369              |             |
| H                           | 3.059565  | -1.698230 | 1.172072              |             |
| H                           | 2.006801  | -1.100695 | 2.287322              |             |
| H                           | 1.649842  | 0.839633  | 1.218072              |             |
| C                           | 1.671332  | 0.085977  | -0.734947             |             |
| O                           | 1.767422  | 0.967015  | -1.559726             |             |
| O                           | 0.971599  | -1.027573 | -0.955869             |             |
| H                           | 1.090352  | -1.558569 | -0.124556             |             |
| H                           | 3.659303  | 1.759347  | 0.154814              |             |
| H                           | 4.071733  | 0.898157  | 1.644889              |             |
| S                           | 4.966745  | -0.250246 | -0.232335             |             |
| H                           | 4.481849  | -0.088393 | -1.480562             |             |
| C                           | -3.368191 | 0.415821  | -0.752872             |             |
| C                           | -1.892807 | 0.824146  | -0.610436             |             |
| N                           | -4.256885 | 1.472035  | -0.298670             |             |
| H                           | -4.119977 | 1.631272  | 0.696311              |             |
| H                           | -5.225545 | 1.191872  | -0.415010             |             |

| Nov 11, 22 15:56            |           |           | dimers_structures.xyz | Page 80/325 |
|-----------------------------|-----------|-----------|-----------------------|-------------|
| H                           | -3.538410 | 0.254074  | -1.824142             |             |
| C                           | -3.626203 | -0.940581 | -0.084460             |             |
| O                           | -4.466492 | -1.150970 | 0.757983              |             |
| O                           | -2.799210 | -1.893714 | -0.557099             |             |
| H                           | -3.000443 | -2.733065 | -0.112959             |             |
| H                           | -1.238279 | 0.083760  | -1.063648             |             |
| H                           | -1.746217 | 1.779784  | -1.112921             |             |
| S                           | -1.341154 | 1.109124  | 1.128086              |             |
| H                           | -1.262894 | -0.187236 | 1.492889              |             |
| 28                          |           |           |                       |             |
| Dimer 183 of the n...n type |           |           |                       |             |
| C                           | 1.758255  | -0.018675 | 0.351351              |             |
| C                           | 2.717728  | -1.200891 | 0.530824              |             |
| N                           | 0.947106  | -0.017559 | -0.867018             |             |
| H                           | 1.460645  | -0.417141 | -1.648934             |             |
| H                           | 0.099476  | -0.556814 | -0.725248             |             |
| H                           | 1.063718  | -0.038759 | 1.198401              |             |
| C                           | 2.489241  | 1.329230  | 0.472086              |             |
| O                           | 3.389913  | 1.541756  | 1.253076              |             |
| O                           | 2.017002  | 2.270852  | -0.347157             |             |
| H                           | 1.327404  | 1.804340  | -0.885504             |             |
| H                           | 3.248144  | -1.117273 | 1.477936              |             |
| H                           | 2.145952  | -2.129093 | 0.533148              |             |
| S                           | 3.947059  | -1.394487 | -0.830779             |             |
| H                           | 4.684462  | -0.305320 | -0.532082             |             |
| C                           | -2.836607 | 0.655331  | 0.765145              |             |
| C                           | -3.756041 | 0.514041  | -0.463687             |             |
| N                           | -1.794263 | 1.638139  | 0.530942              |             |
| H                           | -1.175539 | 1.328333  | -0.213156             |             |
| H                           | -1.223096 | 1.759572  | 1.360908              |             |
| H                           | -3.472832 | 1.006763  | 1.584157              |             |
| C                           | -2.320102 | -0.725375 | 1.181280              |             |
| O                           | -1.177723 | -1.107749 | 1.059437              |             |
| O                           | -3.302111 | -1.491303 | 1.685663              |             |
| H                           | -2.941444 | -2.365592 | 1.906001              |             |
| H                           | -4.591511 | -0.148753 | -0.245592             |             |
| H                           | -4.147294 | 1.500300  | -0.712024             |             |
| S                           | -2.915623 | -0.064002 | -2.002107             |             |
| H                           | -2.782463 | -1.359196 | -1.649442             |             |
| 28                          |           |           |                       |             |
| Dimer 184 of the n...n type |           |           |                       |             |
| C                           | 2.633362  | -0.731414 | -0.632252             |             |
| C                           | 2.201169  | 0.534237  | -1.383274             |             |
| N                           | 1.595326  | -1.439904 | 0.119285              |             |
| H                           | 0.814138  | -0.845549 | 0.420081              |             |
| H                           | 1.215533  | -2.215992 | -0.408686             |             |
| H                           | 3.044416  | -1.416182 | -1.383044             |             |
| C                           | 3.817810  | -0.440161 | 0.311920              |             |
| O                           | 4.755554  | 0.270332  | 0.019763              |             |
| O                           | 3.723373  | -1.067806 | 1.481209              |             |
| H                           | 2.841387  | -1.534792 | 1.418949              |             |
| H                           | 3.021985  | 0.904547  | -1.995182             |             |
| H                           | 1.364111  | 0.296326  | -2.039653             |             |
| S                           | 1.608701  | 1.911760  | -0.308130             |             |
| H                           | 2.817042  | 2.261242  | 0.176838              |             |
| C                           | -1.814296 | 0.416599  | 0.004193              |             |
| C                           | -2.101713 | -0.693041 | -1.023078             |             |
| N                           | -0.992011 | -0.075881 | 1.096426              |             |
| H                           | -1.521953 | -0.734877 | 1.660725              |             |
| H                           | -0.720075 | 0.688218  | 1.706735              |             |
| H                           | -1.252092 | 1.191146  | -0.529019             |             |
| C                           | -3.112960 | 1.086340  | 0.464822              |             |
| O                           | -3.496729 | 1.144183  | 1.608859              |             |
| O                           | -3.790579 | 1.614634  | -0.572354             |             |
| H                           | -4.605122 | 2.025702  | -0.240903             |             |
| H                           | -2.645487 | -0.295533 | -1.877420             |             |
| H                           | -1.152000 | -1.096511 | -1.372500             |             |
| S                           | -3.014463 | -2.148110 | -0.350589             |             |
| H                           | -4.226073 | -1.561733 | -0.261200             |             |

| Nov 11, 22 15:56            | dimers_structures.xyz         | Page 81/325 |
|-----------------------------|-------------------------------|-------------|
| 28                          |                               |             |
| Dimer 185 of the n...n type |                               |             |
| C                           | 1.513086 0.122375 -0.672107   |             |
| C                           | 1.993217 -1.215691 -0.100497  |             |
| N                           | 2.224573 0.620364 -1.852653   |             |
| H                           | 3.200744 0.334798 -1.837536   |             |
| H                           | 1.808608 0.281154 -2.711709   |             |
| H                           | 0.459120 -0.010259 -0.935100  |             |
| C                           | 1.499574 1.222440 0.401099    |             |
| O                           | 1.160638 1.035644 1.550440    |             |
| O                           | 1.867491 2.419597 -0.049119   |             |
| H                           | 2.110117 2.258563 -0.998553   |             |
| H                           | 1.378447 -1.501608 0.749474   |             |
| H                           | 1.896918 -1.986111 -0.865038  |             |
| S                           | 3.770976 -1.236877 0.391851   |             |
| H                           | 3.646057 -0.441742 1.474144   |             |
| C                           | -2.662759 -0.624992 0.897251  |             |
| C                           | -3.217583 0.737847 0.448232   |             |
| N                           | -1.653537 -0.473540 1.929365  |             |
| H                           | -0.845909 0.040807 1.584414   |             |
| H                           | -1.310795 -1.382703 2.222702  |             |
| H                           | -3.512428 -1.175560 1.319076  |             |
| C                           | -2.202683 -1.444204 -0.314599 |             |
| O                           | -1.087893 -1.882744 -0.475822 |             |
| O                           | -3.202333 -1.627093 -1.199251 |             |
| H                           | -2.869583 -2.150525 -1.946047 |             |
| H                           | -4.091918 0.609816 -0.186216  |             |
| H                           | -3.507919 1.299439 1.335613   |             |
| S                           | -2.002998 1.814380 -0.433954  |             |
| H                           | -2.086698 1.206229 -1.634827  |             |
| 28                          |                               |             |
| Dimer 186 of the n...n type |                               |             |
| C                           | -2.555733 -0.801844 0.362681  |             |
| C                           | -1.907143 0.439957 0.986296   |             |
| N                           | -1.907493 -1.343648 -0.835845 |             |
| H                           | -1.472556 -0.603494 -1.380981 |             |
| H                           | -1.200462 -2.030862 -0.605102 |             |
| H                           | -2.552278 -1.584229 1.130329  |             |
| C                           | -4.048369 -0.570546 0.055705  |             |
| O                           | -4.793824 0.058852 0.772822   |             |
| O                           | -4.461290 -1.156454 -1.068516 |             |
| H                           | -3.637802 -1.557643 -1.451562 |             |
| H                           | -2.463815 0.748563 1.869703   |             |
| H                           | -0.877166 0.213415 1.270231   |             |
| S                           | -1.762653 1.874706 -0.162599  |             |
| H                           | -3.080741 2.140122 -0.272120  |             |
| C                           | 1.962175 -0.580937 0.141292   |             |
| C                           | 1.983460 0.612374 -0.829442   |             |
| N                           | 1.477623 -0.188876 1.452725   |             |
| H                           | 2.104468 0.500165 1.860207    |             |
| H                           | 1.475345 -0.986142 2.081173   |             |
| H                           | 1.261602 -1.307900 -0.286055  |             |
| C                           | 3.322781 -1.288175 0.168433   |             |
| O                           | 3.991113 -1.470770 1.158170   |             |
| O                           | 3.691989 -1.698960 -1.060376  |             |
| H                           | 4.553264 -2.142491 -0.999077  |             |
| H                           | 2.247460 0.286452 -1.833174   |             |
| H                           | 0.989323 1.056380 -0.858703   |             |
| S                           | 3.101940 1.992978 -0.332991   |             |
| H                           | 4.266934 1.386048 -0.640192   |             |
| 28                          |                               |             |
| Dimer 187 of the n...n type |                               |             |
| C                           | 2.932527 -0.443777 -0.833753  |             |
| C                           | 1.525862 -0.833938 -0.364420  |             |
| N                           | 4.004186 -1.403954 -0.555895  |             |
| H                           | 3.826506 -1.905988 0.310810   |             |
| H                           | 4.102867 -2.083563 -1.300537  |             |
| H                           | 2.880468 -0.301846 -1.919392  |             |
| C                           | 3.346604 0.935791 -0.284938   |             |

| Nov 11, 22 15:56            | dimers_structures.xyz         | Page 82/325 |
|-----------------------------|-------------------------------|-------------|
| O                           | 2.585076 1.869211 -0.164880   |             |
| O                           | 4.641093 1.022205 0.021318    |             |
| H                           | 4.992930 0.108001 -0.138979   |             |
| H                           | 0.809991 -0.061274 -0.637260  |             |
| H                           | 1.233793 -1.769020 -0.842920  |             |
| S                           | 1.395618 -1.159544 1.446267   |             |
| H                           | 1.565077 0.117298 1.846541    |             |
| C                           | -2.238703 0.108784 0.804146   |             |
| C                           | -2.339869 -1.130601 -0.098807 |             |
| N                           | -3.298576 0.127716 1.798026   |             |
| H                           | -4.200999 0.218658 1.338317   |             |
| H                           | -3.199513 0.937471 2.402023   |             |
| H                           | -1.276374 0.021357 1.323179   |             |
| C                           | -2.141237 1.396123 -0.022056  |             |
| O                           | -2.835681 2.373221 0.127062   |             |
| O                           | -1.158476 1.323128 -0.943017  |             |
| H                           | -1.109619 2.165149 -1.423467  |             |
| H                           | -1.473912 -1.207678 -0.751628 |             |
| H                           | -2.377491 -2.015836 0.535328  |             |
| S                           | -3.868847 -1.209928 -1.129407 |             |
| H                           | -3.508537 -0.273937 -2.031582 |             |
| 28                          |                               |             |
| Dimer 188 of the n...n type |                               |             |
| C                           | -1.977283 -0.408690 -0.582791 |             |
| C                           | -2.512593 1.024091 -0.683433  |             |
| N                           | -2.796619 -1.455879 -1.198349 |             |
| H                           | -3.785540 -1.221854 -1.153425 |             |
| H                           | -2.549069 -1.603664 -2.169448 |             |
| H                           | -0.990961 -0.405562 -1.066925 |             |
| C                           | -1.683246 -0.798259 0.874121  |             |
| O                           | -1.197496 -0.043077 1.688679  |             |
| O                           | -1.964907 -2.069603 1.157925  |             |
| H                           | -2.367863 -2.421085 0.320722  |             |
| H                           | -1.823067 1.718055 -0.205618  |             |
| H                           | -2.608747 1.299705 -1.733825  |             |
| S                           | -4.195657 1.262393 0.034737   |             |
| H                           | -3.838252 1.109194 1.326225   |             |
| C                           | 1.631250 0.483495 -0.077440   |             |
| C                           | 1.942766 -0.925916 0.452720   |             |
| N                           | 1.168007 0.436541 -1.455214   |             |
| H                           | 1.902868 0.069825 -2.054744   |             |
| H                           | 0.962370 1.373039 -1.789066   |             |
| H                           | 0.818460 0.866228 0.550707    |             |
| C                           | 2.813991 1.430895 0.144521    |             |
| O                           | 3.357402 2.078395 -0.718984   |             |
| O                           | 3.180076 1.472175 1.440558    |             |
| H                           | 3.923810 2.088267 1.538362    |             |
| H                           | 2.164257 -0.896705 1.517103   |             |
| H                           | 1.069411 -1.558209 0.297729   |             |
| S                           | 3.314575 -1.795560 -0.423926  |             |
| H                           | 4.330023 -1.088003 0.112549   |             |
| 28                          |                               |             |
| Dimer 189 of the n...n type |                               |             |
| C                           | 2.635441 0.504290 0.971654    |             |
| C                           | 3.403840 -0.657526 0.332151   |             |
| N                           | 1.529252 0.164242 1.865241    |             |
| H                           | 0.969341 -0.618652 1.531533   |             |
| H                           | 1.852100 -0.047075 2.801628   |             |
| H                           | 3.367605 1.070724 1.559848    |             |
| C                           | 2.128695 1.512611 -0.076072   |             |
| O                           | 2.720534 1.788231 -1.094610   |             |
| O                           | 0.972373 2.086906 0.263718    |             |
| H                           | 0.723482 1.641864 1.117759    |             |
| H                           | 4.302486 -0.292592 -0.162252  |             |
| H                           | 3.700819 -1.359922 1.110531   |             |
| S                           | 2.466288 -1.661111 -0.903594  |             |
| H                           | 2.551292 -0.772431 -1.914499  |             |
| C                           | -2.962675 -0.990103 -0.197773 |             |
| C                           | -3.188691 0.287523 -1.022657  |             |

| Nov 11, 22 15:56            |           | dimers_structures.xyz |           | Page 83/325 |
|-----------------------------|-----------|-----------------------|-----------|-------------|
| N                           | -3.751824 | -0.977257             | 1.023429  |             |
| H                           | -3.444761 | -0.213469             | 1.620694  |             |
| H                           | -3.596056 | -1.831701             | 1.548993  |             |
| H                           | -3.306678 | -1.823396             | -0.823125 |             |
| C                           | -1.467517 | -1.243202             | 0.031425  |             |
| O                           | -0.968517 | -1.464522             | 1.114825  |             |
| O                           | -0.768590 | -1.204436             | -1.107954 |             |
| H                           | 0.182271  | -1.382674             | -0.921073 |             |
| H                           | -2.708548 | 0.209260              | -1.995403 |             |
| H                           | -4.260281 | 0.418876              | -1.169925 |             |
| S                           | -2.617436 | 1.841080              | -0.204576 |             |
| H                           | -1.297658 | 1.681803              | -0.434892 |             |
| 28                          |           |                       |           |             |
| Dimer 190 of the n...n type |           |                       |           |             |
| C                           | 1.600506  | -0.049552             | -0.272092 |             |
| C                           | 1.924461  | -0.337847             | 1.198824  |             |
| N                           | 1.727482  | -1.174967             | -1.200536 |             |
| H                           | 2.434814  | -1.834325             | -0.886570 |             |
| H                           | 0.848399  | -1.668355             | -1.318304 |             |
| H                           | 0.566558  | 0.309991              | -0.304237 |             |
| C                           | 2.427206  | 1.136475              | -0.805324 |             |
| O                           | 2.668248  | 2.132550              | -0.160004 |             |
| O                           | 2.829579  | 0.980506              | -2.065500 |             |
| H                           | 2.515823  | 0.068570              | -2.307653 |             |
| H                           | 1.778427  | 0.559202              | 1.797767  |             |
| H                           | 1.259913  | -1.116813             | 1.573320  |             |
| S                           | 3.626161  | -0.987609             | 1.485096  |             |
| H                           | 4.280897  | 0.158723              | 1.208253  |             |
| C                           | -3.037698 | -0.209022             | 0.925558  |             |
| C                           | -2.029770 | -1.255558             | 0.428333  |             |
| N                           | -4.397063 | -0.557906             | 0.552055  |             |
| H                           | -4.487804 | -0.568918             | -0.460467 |             |
| H                           | -5.047195 | 0.142297              | 0.894422  |             |
| H                           | -2.966650 | -0.217406             | 2.020534  |             |
| C                           | -2.623728 | 1.211111              | 0.512185  |             |
| O                           | -3.356662 | 2.026467              | 0.007329  |             |
| O                           | -1.328430 | 1.459470              | 0.800232  |             |
| H                           | -1.119939 | 2.375462              | 0.554181  |             |
| H                           | -1.042599 | -1.057300             | 0.838179  |             |
| H                           | -2.350889 | -2.240150             | 0.766833  |             |
| S                           | -1.911894 | -1.411585             | -1.407293 |             |
| H                           | -1.478685 | -0.159344             | -1.663094 |             |
| 28                          |           |                       |           |             |
| Dimer 191 of the n...n type |           |                       |           |             |
| C                           | 2.348607  | 0.729064              | 0.928878  |             |
| C                           | 3.060373  | -0.626496             | 1.000434  |             |
| N                           | 0.937090  | 0.733528              | 1.332911  |             |
| H                           | 0.514610  | -0.190391             | 1.281632  |             |
| H                           | 0.827735  | 1.063800              | 2.284543  |             |
| H                           | 2.898427  | 1.407119              | 1.590623  |             |
| C                           | 2.492672  | 1.357005              | -0.471445 |             |
| O                           | 3.522365  | 1.335891              | -1.107500 |             |
| O                           | 1.386170  | 1.949141              | -0.917163 |             |
| H                           | 0.712971  | 1.778462              | -0.212294 |             |
| H                           | 4.125266  | -0.503345             | 0.813493  |             |
| H                           | 2.929657  | -1.053871             | 1.994194  |             |
| S                           | 2.433344  | -1.909032             | -0.174620 |             |
| H                           | 2.971378  | -1.372454             | -1.288932 |             |
| C                           | -2.904362 | -0.781069             | -0.658767 |             |
| C                           | -2.862165 | 0.734191              | -0.947012 |             |
| N                           | -3.984214 | -1.117286             | 0.252771  |             |
| H                           | -3.805103 | -0.708394             | 1.165828  |             |
| H                           | -4.035159 | -2.122516             | 0.384710  |             |
| H                           | -3.091545 | -1.268178             | -1.620924 |             |
| C                           | -1.520369 | -1.239742             | -0.194197 |             |
| O                           | -1.237788 | -1.521660             | 0.952380  |             |
| O                           | -0.633710 | -1.248779             | -1.196028 |             |
| H                           | 0.256299  | -1.492944             | -0.850448 |             |
| H                           | -2.074971 | 0.963327              | -1.663543 |             |

Nov 11, 22 15:56

dimers\_structures.xyz

Page 84/325

|                             |           |           |           |
|-----------------------------|-----------|-----------|-----------|
| H                           | -3.820220 | 1.029300  | -1.374638 |
| S                           | -2.663576 | 1.815282  | 0.535627  |
| H                           | -1.380600 | 1.501922  | 0.819017  |
| 28                          |           |           |           |
| Dimer 192 of the n...n type |           |           |           |
| C                           | 2.994097  | 0.196009  | 0.622230  |
| C                           | 1.962890  | 1.330766  | 0.564055  |
| N                           | 4.117667  | 0.293367  | -0.314224 |
| H                           | 3.845227  | 0.794031  | -1.156813 |
| H                           | 4.912177  | 0.768778  | 0.096322  |
| H                           | 3.397282  | 0.180212  | 1.640927  |
| C                           | 2.323623  | -1.181228 | 0.455082  |
| O                           | 1.278053  | -1.487783 | 0.984771  |
| O                           | 3.019354  | -2.028607 | -0.299810 |
| H                           | 3.806398  | -1.498813 | -0.596688 |
| H                           | 1.152014  | 1.137079  | 1.264788  |
| H                           | 2.444706  | 2.270115  | 0.835507  |
| S                           | 1.247017  | 1.621246  | -1.109264 |
| H                           | 0.486075  | 0.507788  | -1.167728 |
| C                           | -2.799387 | -0.973858 | 0.186756  |
| C                           | -3.186608 | 0.236273  | 1.056455  |
| N                           | -1.844617 | -1.835855 | 0.856893  |
| H                           | -0.935776 | -1.384762 | 0.929084  |
| H                           | -1.698747 | -2.682227 | 0.316106  |
| H                           | -3.727977 | -1.535784 | 0.030127  |
| C                           | -2.357467 | -0.521444 | -1.210139 |
| O                           | -1.283624 | -0.762225 | -1.713343 |
| O                           | -3.317993 | 0.184790  | -1.834599 |
| H                           | -2.995072 | 0.448724  | -2.711275 |
| H                           | -3.960223 | 0.826808  | 0.569484  |
| H                           | -3.574465 | -0.134440 | 2.004943  |
| S                           | -1.790784 | 1.345221  | 1.527831  |
| H                           | -1.551899 | 1.867938  | 0.306681  |
| 28                          |           |           |           |
| Dimer 193 of the n...n type |           |           |           |
| C                           | 2.868666  | -0.436500 | 0.683029  |
| C                           | 1.875200  | 0.658773  | 1.086892  |
| N                           | 4.272978  | -0.033451 | 0.568905  |
| H                           | 4.348318  | 0.931938  | 0.257036  |
| H                           | 4.762303  | -0.120132 | 1.451602  |
| H                           | 2.803636  | -1.224612 | 1.442039  |
| C                           | 2.444639  | -1.129360 | -0.626574 |
| O                           | 1.293857  | -1.367712 | -0.920271 |
| O                           | 3.468400  | -1.473566 | -1.405556 |
| H                           | 4.266075  | -1.116263 | -0.934213 |
| H                           | 0.869965  | 0.252249  | 1.173840  |
| H                           | 2.164098  | 1.066690  | 2.055935  |
| S                           | 1.845014  | 2.110500  | -0.050301 |
| H                           | 1.340811  | 1.464334  | -1.121130 |
| C                           | -1.901300 | -0.897098 | -0.156816 |
| C                           | -1.725263 | 0.413729  | -0.940023 |
| N                           | -2.758243 | -1.829772 | -0.869658 |
| H                           | -3.702339 | -1.456940 | -0.927841 |
| H                           | -2.823910 | -2.705619 | -0.361012 |
| H                           | -0.897195 | -1.328530 | -0.083746 |
| C                           | -2.347586 | -0.619696 | 1.281356  |
| O                           | -3.331246 | -1.080465 | 1.810747  |
| O                           | -1.490144 | 0.208546  | 1.913813  |
| H                           | -1.799106 | 0.350657  | 2.822863  |
| H                           | -1.007558 | 1.065273  | -0.447524 |
| H                           | -1.350830 | 0.172183  | -1.934102 |
| S                           | -3.281014 | 1.364851  | -1.228915 |
| H                           | -3.414488 | 1.852206  | 0.021920  |
| 28                          |           |           |           |
| Dimer 194 of the n...n type |           |           |           |
| C                           | 2.790018  | -0.141651 | 0.990273  |
| C                           | 2.952880  | -1.494556 | 0.284684  |
| N                           | 1.569523  | 0.071046  | 1.769950  |
| H                           | 0.741880  | -0.394806 | 1.382539  |

| Nov 11, 22 15:56            |           |           |           | dimers_structures.xyz | Page 85/325 |
|-----------------------------|-----------|-----------|-----------|-----------------------|-------------|
| H                           | 1.682733  | -0.235807 | 2.728571  |                       |             |
| H                           | 3.642854  | -0.045363 | 1.673474  |                       |             |
| C                           | 2.961877  | 1.036609  | 0.012128  |                       |             |
| O                           | 3.735440  | 1.037852  | -0.920352 |                       |             |
| O                           | 2.195485  | 2.083942  | 0.312970  |                       |             |
| H                           | 1.655751  | 1.761431  | 1.086298  |                       |             |
| H                           | 3.954882  | -1.576729 | -0.133945 |                       |             |
| H                           | 2.817703  | -2.295013 | 1.012349  |                       |             |
| S                           | 1.732540  | -1.840914 | -1.052878 |                       |             |
| H                           | 2.200115  | -0.927214 | -1.926805 |                       |             |
| C                           | -2.275125 | -0.107580 | 0.917331  |                       |             |
| C                           | -1.822256 | 1.298753  | 0.487156  |                       |             |
| N                           | -1.177310 | -1.056643 | 0.844072  |                       |             |
| H                           | -0.891380 | -1.194146 | -0.122421 |                       |             |
| H                           | -1.465049 | -1.964581 | 1.195145  |                       |             |
| H                           | -2.592565 | -0.020184 | 1.962869  |                       |             |
| C                           | -3.519243 | -0.545476 | 0.136504  |                       |             |
| O                           | -3.601493 | -1.546815 | -0.534336 |                       |             |
| O                           | -4.532701 | 0.328874  | 0.289359  |                       |             |
| H                           | -5.298946 | 0.015227  | -0.217406 |                       |             |
| H                           | -2.616878 | 2.024809  | 0.644870  |                       |             |
| H                           | -0.964503 | 1.582698  | 1.095529  |                       |             |
| S                           | -1.236552 | 1.421780  | -1.258648 |                       |             |
| H                           | -2.450650 | 1.367590  | -1.844377 |                       |             |
| 28                          |           |           |           |                       |             |
| Dimer 195 of the n...n type |           |           |           |                       |             |
| C                           | 3.078525  | -0.197505 | -0.695982 |                       |             |
| C                           | 3.227493  | 1.213940  | -0.110627 |                       |             |
| N                           | 2.211812  | -0.331652 | -1.865706 |                       |             |
| H                           | 1.394126  | 0.269735  | -1.796616 |                       |             |
| H                           | 2.702273  | -0.117160 | -2.725387 |                       |             |
| H                           | 4.082122  | -0.533282 | -0.981447 |                       |             |
| C                           | 2.621130  | -1.202812 | 0.376427  |                       |             |
| O                           | 3.004297  | -1.196574 | 1.521910  |                       |             |
| O                           | 1.746778  | -2.111559 | -0.080202 |                       |             |
| H                           | 1.594319  | -1.854231 | -1.029760 |                       |             |
| H                           | 3.933088  | 1.209258  | 0.718437  |                       |             |
| H                           | 3.606270  | 1.881506  | -0.884555 |                       |             |
| S                           | 1.648466  | 1.978246  | 0.462600  |                       |             |
| H                           | 1.525891  | 1.255504  | 1.594343  |                       |             |
| C                           | -1.985769 | 0.769567  | 0.488313  |                       |             |
| C                           | -3.367740 | 0.261515  | 0.939926  |                       |             |
| N                           | -2.101209 | 1.808205  | -0.520849 |                       |             |
| H                           | -2.511730 | 1.421782  | -1.366703 |                       |             |
| H                           | -1.176465 | 2.145293  | -0.772729 |                       |             |
| H                           | -1.516332 | 1.198836  | 1.379251  |                       |             |
| C                           | -1.106141 | -0.408726 | 0.062456  |                       |             |
| O                           | -0.786170 | -0.652177 | -1.079706 |                       |             |
| O                           | -0.727763 | -1.158891 | 1.110508  |                       |             |
| H                           | -0.101109 | -1.839255 | 0.799067  |                       |             |
| H                           | -3.264894 | -0.456135 | 1.752307  |                       |             |
| H                           | -3.946725 | 1.112703  | 1.298058  |                       |             |
| S                           | -4.404687 | -0.482729 | -0.392342 |                       |             |
| H                           | -3.697641 | -1.620976 | -0.545674 |                       |             |
| 28                          |           |           |           |                       |             |
| Dimer 196 of the n...n type |           |           |           |                       |             |
| C                           | 3.242323  | -0.365010 | 0.250995  |                       |             |
| C                           | 3.185225  | 1.147904  | 0.512725  |                       |             |
| N                           | 3.507045  | -0.760348 | -1.136692 |                       |             |
| H                           | 3.204163  | -0.033339 | -1.780809 |                       |             |
| H                           | 4.489898  | -0.943553 | -1.297832 |                       |             |
| H                           | 4.033572  | -0.775941 | 0.887117  |                       |             |
| C                           | 1.955506  | -1.064239 | 0.731383  |                       |             |
| O                           | 1.432627  | -0.850825 | 1.802807  |                       |             |
| O                           | 1.475402  | -1.953910 | -0.136359 |                       |             |
| H                           | 2.112923  | -1.910745 | -0.899715 |                       |             |
| H                           | 2.906690  | 1.332347  | 1.549354  |                       |             |
| H                           | 4.171335  | 1.577950  | 0.336828  |                       |             |
| S                           | 2.035971  | 2.067438  | -0.600116 |                       |             |

| Nov 11, 22 15:56            |           |           |           | dimers_structures.xyz | Page 86/325 |
|-----------------------------|-----------|-----------|-----------|-----------------------|-------------|
| H                           | 0.858637  | 1.608810  | -0.051416 |                       |             |
| C                           | -1.829386 | 0.772338  | -0.346072 |                       |             |
| C                           | -1.550914 | -0.547688 | -1.082324 |                       |             |
| N                           | -0.856920 | 1.006381  | 0.709865  |                       |             |
| H                           | -0.720176 | 0.170560  | 1.273785  |                       |             |
| H                           | -1.176488 | 1.739101  | 1.336196  |                       |             |
| H                           | -1.727516 | 1.569468  | -1.095103 |                       |             |
| C                           | -3.280824 | 0.863479  | 0.133382  |                       |             |
| O                           | -3.623368 | 1.169022  | 1.250885  |                       |             |
| O                           | -4.148520 | 0.589808  | -0.858925 |                       |             |
| H                           | -5.053742 | 0.685774  | -0.521793 |                       |             |
| H                           | -2.134752 | -0.603499 | -1.997916 |                       |             |
| H                           | -0.492539 | -0.589729 | -1.337264 |                       |             |
| S                           | -1.863054 | -2.068513 | -0.084257 |                       |             |
| H                           | -3.210264 | -2.005708 | -0.131473 |                       |             |
| 28                          |           |           |           |                       |             |
| Dimer 197 of the n...n type |           |           |           |                       |             |
| C                           | 3.162145  | -0.816855 | -0.001015 |                       |             |
| C                           | 3.508463  | 0.421340  | 0.839411  |                       |             |
| N                           | 3.319298  | -0.676058 | -1.451499 |                       |             |
| H                           | 3.229431  | 0.296857  | -1.734335 |                       |             |
| H                           | 4.215873  | -1.021351 | -1.771470 |                       |             |
| H                           | 3.810504  | -1.630130 | 0.342426  |                       |             |
| C                           | 1.733933  | -1.310648 | 0.298502  |                       |             |
| O                           | 1.271595  | -1.401156 | 1.415286  |                       |             |
| O                           | 1.046871  | -1.657696 | -0.787536 |                       |             |
| H                           | 1.670411  | -1.466534 | -1.539685 |                       |             |
| H                           | 3.284628  | 0.231977  | 1.887933  |                       |             |
| H                           | 4.572997  | 0.635335  | 0.743540  |                       |             |
| S                           | 2.663604  | 1.970443  | 0.303375  |                       |             |
| H                           | 1.400613  | 1.604670  | 0.612955  |                       |             |
| C                           | -1.993388 | -0.765540 | -0.236037 |                       |             |
| C                           | -3.453778 | -0.590321 | -0.688857 |                       |             |
| N                           | -1.904314 | -1.355943 | 1.086713  |                       |             |
| H                           | -2.311414 | -0.725132 | 1.771881  |                       |             |
| H                           | -0.926234 | -1.478307 | 1.341560  |                       |             |
| H                           | -1.526619 | -1.447711 | -0.952759 |                       |             |
| C                           | -1.233961 | 0.556809  | -0.374446 |                       |             |
| O                           | -0.784768 | 1.201312  | 0.546718  |                       |             |
| O                           | -1.121158 | 0.937327  | -1.660471 |                       |             |
| H                           | -0.642492 | 1.781051  | -1.698744 |                       |             |
| H                           | -3.497760 | -0.237193 | -1.717545 |                       |             |
| H                           | -3.950080 | -1.558819 | -0.629875 |                       |             |
| S                           | -4.473591 | 0.525936  | 0.370424  |                       |             |
| H                           | -3.915755 | 1.690233  | -0.020490 |                       |             |
| 28                          |           |           |           |                       |             |
| Dimer 198 of the n...n type |           |           |           |                       |             |
| C                           | 3.222221  | 0.701253  | -0.279415 |                       |             |
| C                           | 3.095602  | -0.473254 | -1.260119 |                       |             |
| N                           | 3.908280  | 0.416925  | 0.984233  |                       |             |
| H                           | 3.814010  | -0.564303 | 1.235913  |                       |             |
| H                           | 4.894769  | 0.641351  | 0.938060  |                       |             |
| H                           | 3.767410  | 1.497948  | -0.797099 |                       |             |
| C                           | 1.842374  | 1.313334  | 0.028504  |                       |             |
| O                           | 0.992969  | 1.510137  | -0.813091 |                       |             |
| O                           | 1.668506  | 1.631995  | 1.309669  |                       |             |
| H                           | 2.512554  | 1.341811  | 1.748032  |                       |             |
| H                           | 2.531272  | -0.164191 | -2.138347 |                       |             |
| H                           | 4.089738  | -0.788834 | -1.577014 |                       |             |
| S                           | 2.322576  | -1.981666 | -0.535634 |                       |             |
| H                           | 1.096849  | -1.464097 | -0.307753 |                       |             |
| C                           | -2.559942 | 0.341555  | 1.057217  |                       |             |
| C                           | -3.603557 | 0.683316  | -0.020377 |                       |             |
| N                           | -1.511940 | 1.341545  | 1.117282  |                       |             |
| H                           | -0.980555 | 1.359242  | 0.249296  |                       |             |
| H                           | -0.838957 | 1.114105  | 1.842120  |                       |             |
| H                           | -3.100658 | 0.338998  | 2.011927  |                       |             |
| C                           | -2.046258 | -1.092509 | 0.880113  |                       |             |
| O                           | -0.884254 | -1.408009 | 0.768472  |                       |             |

| Nov 11, 22 15:56            | dimers_structures.xyz |           | Page 87/325 |
|-----------------------------|-----------------------|-----------|-------------|
| O -3.052702                 | -1.987794             | 0.876881  |             |
| H -2.681275                 | -2.878616             | 0.771965  |             |
| H -4.451408                 | 0.003645              | 0.032157  |             |
| H -3.957266                 | 1.699298              | 0.153200  |             |
| S -2.955107                 | 0.693237              | -1.748710 |             |
| H -2.849161                 | -0.643596             | -1.894565 |             |
| 28                          |                       |           |             |
| Dimer 199 of the n...n type |                       |           |             |
| C -2.357097                 | 0.362116              | 0.890611  |             |
| C -1.813548                 | -1.036639             | 0.576162  |             |
| N -3.728484                 | 0.425136              | 1.403878  |             |
| H -4.296960                 | -0.321248             | 1.010506  |             |
| H -3.756709                 | 0.346831              | 2.413381  |             |
| H -1.693543                 | 0.803862              | 1.643153  |             |
| C -2.240409                 | 1.302201              | -0.324516 |             |
| O -1.301369                 | 1.301097              | -1.089554 |             |
| O -3.260971                 | 2.149735              | -0.445415 |             |
| H -3.881432                 | 1.892270              | 0.285769  |             |
| H -0.786656                 | -0.981509             | 0.223194  |             |
| H -1.840018                 | -1.643593             | 1.481411  |             |
| S -2.804669                 | -1.972489             | -0.665906 |             |
| H -2.437897                 | -1.241363             | -1.738413 |             |
| C 2.248641                  | -0.310035             | 0.957744  |             |
| C 1.785814                  | 1.050854              | 0.410040  |             |
| N 3.419966                  | -0.171055             | 1.806102  |             |
| H 4.201808                  | 0.176972              | 1.256951  |             |
| H 3.702319                  | -1.076637             | 2.167590  |             |
| H 1.421493                  | -0.690375             | 1.569724  |             |
| C 2.424058                  | -1.326861             | -0.177259 |             |
| O 3.434822                  | -1.947244             | -0.406311 |             |
| H 1.294652                  | -1.460291             | -0.900993 |             |
| H 1.438694                  | -2.119778             | -1.598505 |             |
| H 0.840595                  | 0.962108              | -0.120519 |             |
| H 1.652890                  | 1.731342              | 1.250953  |             |
| S 3.003658                  | 1.888773              | -0.695737 |             |
| H 2.789399                  | 1.125831              | -1.787278 |             |
| 28                          |                       |           |             |
| Dimer 200 of the n...n type |                       |           |             |
| C 2.365389                  | -0.485047             | 0.631124  |             |
| C 1.729984                  | 0.910244              | 0.664238  |             |
| N 3.684126                  | -0.614597             | 1.258108  |             |
| H 4.213321                  | 0.249773              | 1.170149  |             |
| H 3.612794                  | -0.843953             | 2.242265  |             |
| H 1.677408                  | -1.164925             | 1.146852  |             |
| C 2.443962                  | -1.035306             | -0.805686 |             |
| O 1.574051                  | -0.878688             | -1.634420 |             |
| O 3.550301                  | -1.734418             | -1.052208 |             |
| H 4.076387                  | -1.662874             | -0.212641 |             |
| H 0.752012                  | 0.905904              | 0.186700  |             |
| H 1.607096                  | 1.223639              | 1.701226  |             |
| S 2.754833                  | 2.226325              | -0.122386 |             |
| H 2.566761                  | 1.829173              | -1.397577 |             |
| C -2.431230                 | 0.399560              | -0.761296 |             |
| C -1.682974                 | -0.919062             | -0.494606 |             |
| N -1.658600                 | 1.545469              | -0.312230 |             |
| H -1.611830                 | 1.553493              | 0.703276  |             |
| H -2.115259                 | 2.409160              | -0.587358 |             |
| H -2.549954                 | 0.465214              | -1.848714 |             |
| C -3.850010                 | 0.344498              | -0.183246 |             |
| O -4.286970                 | 1.090478              | 0.661213  |             |
| O -4.570144                 | -0.654094             | -0.731057 |             |
| H -5.455687                 | -0.658504             | -0.333459 |             |
| H -2.230927                 | -1.763946             | -0.907006 |             |
| H -0.704897                 | -0.865189             | -0.972002 |             |
| S -1.319754                 | -1.254987             | 1.283467  |             |
| H -2.565800                 | -1.610018             | 1.658446  |             |
| 28                          |                       |           |             |
| Dimer 201 of the n...n type |                       |           |             |
| C -2.788696                 | -0.851824             | 0.635566  |             |

| Nov 11, 22 15:56            | dimers_structures.xyz |           | Page 88/325 |
|-----------------------------|-----------------------|-----------|-------------|
| C -3.036066                 | 0.558753              | 1.184456  |             |
| N -1.572305                 | -1.532633             | 1.079968  |             |
| H -0.778083                 | -0.903489             | 1.247347  |             |
| H -1.731462                 | -2.072193             | 1.922072  |             |
| H -3.647775                 | -1.462926             | 0.937915  |             |
| C -2.828407                 | -0.875345             | -0.905110 |             |
| O -3.590795                 | -0.214496             | -1.575296 |             |
| O -1.948976                 | -1.723081             | -1.438970 |             |
| H -1.464701                 | -2.085440             | -0.644900 |             |
| H -4.021439                 | 0.912891              | 0.885338  |             |
| H -2.996897                 | 0.528639              | 2.273487  |             |
| S -1.781634                 | 1.813956              | 0.681905  |             |
| H -2.202699                 | 1.950762              | -0.591516 |             |
| C 1.867031                  | -0.722457             | 0.244449  |             |
| C 1.310187                  | 0.023872              | -0.978690 |             |
| N 1.208779                  | -0.294397             | 1.469402  |             |
| H 1.299252                  | 0.712729              | 1.577656  |             |
| H 1.658519                  | -0.715665             | 2.276430  |             |
| H 1.640679                  | -1.784254             | 0.083880  |             |
| C 3.395687                  | -0.637055             | 0.306770  |             |
| O 4.031347                  | -0.281663             | 1.270707  |             |
| O 3.962453                  | -1.030789             | -0.849764 |             |
| H 4.927704                  | -0.978281             | -0.761491 |             |
| H 1.691078                  | -0.411501             | -1.899510 |             |
| H 0.224951                  | -0.060136             | -0.977218 |             |
| S 1.647594                  | 1.837654              | -0.993138 |             |
| H 2.939530                  | 1.756875              | -1.373407 |             |
| 28                          |                       |           |             |
| Dimer 202 of the n...n type |                       |           |             |
| C 2.034005                  | -0.345359             | 0.122323  |             |
| C 2.030781                  | 0.927721              | -0.733188 |             |
| N 2.050017                  | -0.154942             | 1.573315  |             |
| H 2.547058                  | 0.695370              | 1.825930  |             |
| H 1.104531                  | -0.104257             | 1.939922  |             |
| H 1.125095                  | -0.905803             | -0.127481 |             |
| C 3.187525                  | -1.287374             | -0.272253 |             |
| O 3.556724                  | -1.461432             | -1.412422 |             |
| O 3.729271                  | -1.926239             | 0.764048  |             |
| H 3.253883                  | -1.552590             | 1.553088  |             |
| H 1.991638                  | 0.672294              | -1.790717 |             |
| H 1.153725                  | 1.526448              | -0.487618 |             |
| S 3.468252                  | 2.043234              | -0.435054 |             |
| H 4.399438                  | 1.256321              | -1.011854 |             |
| C -3.255405                 | 0.898276              | -0.255513 |             |
| C -1.794388                 | 0.765940              | 0.206385  |             |
| N -4.107695                 | 1.379683              | 0.817305  |             |
| H -4.152850                 | 0.687653              | 1.560669  |             |
| H -5.057338                 | 1.506806              | 0.482283  |             |
| H -3.253550                 | 1.643882              | -1.059398 |             |
| C -3.742801                 | -0.405928             | -0.900691 |             |
| O -4.717933                 | -1.029504             | -0.555127 |             |
| O -2.946947                 | -0.781083             | -1.921022 |             |
| H -3.291532                 | -1.603829             | -2.304024 |             |
| H -1.149319                 | 0.519617              | -0.634279 |             |
| H -1.476316                 | 1.718334              | 0.629444  |             |
| S -1.523998                 | -0.467626             | 1.553259  |             |
| H -1.626013                 | -1.576758             | 0.792242  |             |
| 28                          |                       |           |             |
| Dimer 203 of the n...n type |                       |           |             |
| C -1.978796                 | 0.126512              | 0.793688  |             |
| C -1.972607                 | -1.308050             | 0.251746  |             |
| N -3.082268                 | 0.480498              | 1.689468  |             |
| H -3.934517                 | -0.009221             | 1.427062  |             |
| H -2.870676                 | 0.253966              | 2.653831  |             |
| H -1.039247                 | 0.272794              | 1.337369  |             |
| C -1.910641                 | 1.161384              | -0.343235 |             |
| O -1.269016                 | 1.005567              | -1.359155 |             |
| O -2.598344                 | 2.274988              | -0.095739 |             |
| H -3.050248                 | 2.097566              | 0.769768  |             |

| Nov 11, 22 15:56            |           | dimers_structures.xyz |           | Page 89/325 |
|-----------------------------|-----------|-----------------------|-----------|-------------|
| H                           | -1.105918 | -1.469216             | -0.386878 |             |
| H                           | -1.922275 | -2.008392             | 1.085710  |             |
| S                           | -3.493247 | -1.773450             | -0.681120 |             |
| H                           | -3.260964 | -0.992867             | -1.756179 |             |
| C                           | 1.894991  | -0.001366             | -0.808241 |             |
| C                           | 1.985745  | -1.274266             | 0.048836  |             |
| N                           | 2.805102  | -0.059436             | -1.939690 |             |
| H                           | 3.767266  | -0.063299             | -1.611098 |             |
| H                           | 2.699748  | 0.768632              | -2.517041 |             |
| H                           | 0.868438  | 0.046220              | -1.190086 |             |
| C                           | 2.054686  | 1.257417              | 0.051233  |             |
| O                           | 2.833855  | 2.154961              | -0.163882 |             |
| O                           | 1.194492  | 1.263971              | 1.092127  |             |
| H                           | 1.316105  | 2.084940              | 1.595587  |             |
| H                           | 1.221783  | -1.278800             | 0.823235  |             |
| H                           | 1.832921  | -2.137955             | -0.597752 |             |
| S                           | 3.629020  | -1.555908             | 0.841877  |             |
| H                           | 3.517200  | -0.607746             | 1.794938  |             |
| 28                          |           |                       |           |             |
| Dimer 204 of the n...n type |           |                       |           |             |
| C                           | 2.837746  | -0.416745             | 0.735914  |             |
| C                           | 1.848003  | 0.696154              | 1.096208  |             |
| N                           | 4.223774  | -0.011237             | 0.493756  |             |
| H                           | 4.267957  | 0.911251              | 0.067917  |             |
| H                           | 4.764304  | 0.010186              | 1.350200  |             |
| H                           | 2.835880  | -1.125697             | 1.571764  |             |
| C                           | 2.344327  | -1.242654             | -0.467327 |             |
| O                           | 1.179266  | -1.506067             | -0.670660 |             |
| O                           | 3.323181  | -1.672003             | -1.259531 |             |
| H                           | 4.145622  | -1.267461             | -0.879157 |             |
| H                           | 0.860986  | 0.275786              | 1.282004  |             |
| H                           | 2.184055  | 1.204391              | 1.999722  |             |
| S                           | 1.707006  | 2.026628              | -0.176762 |             |
| H                           | 1.164138  | 1.261615              | -1.147886 |             |
| C                           | -3.300388 | 0.498596              | 0.125477  |             |
| C                           | -2.967738 | -0.589070             | 1.167116  |             |
| N                           | -4.124706 | -0.030156             | -0.947489 |             |
| H                           | -3.603031 | -0.729270             | -1.469251 |             |
| H                           | -4.365148 | 0.706071              | -1.603692 |             |
| H                           | -3.870388 | 1.266262              | 0.659798  |             |
| C                           | -2.007268 | 1.171831              | -0.344700 |             |
| O                           | -1.532956 | 1.063321              | -1.453471 |             |
| O                           | -1.440097 | 1.886901              | 0.640819  |             |
| H                           | -0.566336 | 2.222564              | 0.342001  |             |
| H                           | -2.390173 | -0.165294             | 1.986868  |             |
| H                           | -3.903356 | -0.981123             | 1.565690  |             |
| S                           | -2.087847 | -2.069456             | 0.505260  |             |
| H                           | -0.887761 | -1.500183             | 0.260803  |             |
| 28                          |           |                       |           |             |
| Dimer 205 of the n...n type |           |                       |           |             |
| C                           | 2.381825  | -0.133844             | 0.809958  |             |
| C                           | 2.329193  | 1.222378              | 0.097596  |             |
| N                           | 3.661985  | -0.502536             | 1.419314  |             |
| H                           | 4.441610  | -0.137272             | 0.877321  |             |
| H                           | 3.742228  | -0.150970             | 2.365903  |             |
| H                           | 1.621922  | -0.104456             | 1.599037  |             |
| C                           | 1.923838  | -1.276703             | -0.113553 |             |
| O                           | 1.035682  | -1.170469             | -0.930227 |             |
| O                           | 2.575046  | -2.421988             | 0.089775  |             |
| H                           | 3.261634  | -2.196120             | 0.769830  |             |
| H                           | 1.331399  | 1.402750              | -0.295923 |             |
| H                           | 2.568180  | 2.012413              | 0.809640  |             |
| S                           | 3.555109  | 1.410828              | -1.266764 |             |
| H                           | 2.965915  | 0.553210              | -2.124885 |             |
| C                           | -3.002862 | 0.803243              | -0.598974 |             |
| C                           | -1.544140 | 0.909874              | -0.122263 |             |
| N                           | -3.861891 | 1.730214              | 0.118173  |             |
| H                           | -3.897308 | 1.474178              | 1.101565  |             |
| H                           | -4.813436 | 1.670892              | -0.230154 |             |

Nov 11, 22 15:56

dimers\_structures.xyz

Page 90/325

|                             |           |           |           |
|-----------------------------|-----------|-----------|-----------|
| H                           | -2.997561 | 1.081761  | -1.659219 |
| C                           | -3.484540 | -0.651819 | -0.551718 |
| O                           | -4.426059 | -1.052593 | 0.091318  |
| O                           | -2.726626 | -1.449961 | -1.328244 |
| H                           | -3.061259 | -2.359015 | -1.266912 |
| H                           | -0.884585 | 0.286376  | -0.722007 |
| H                           | -1.231527 | 1.950143  | -0.211633 |
| S                           | -1.280862 | 0.482997  | 1.654683  |
| H                           | -1.320060 | -0.857532 | 1.511072  |
| 28                          |           |           |           |
| Dimer 206 of the n...n type |           |           |           |
| C                           | -1.794111 | 0.229928  | 0.338877  |
| C                           | -1.784696 | -0.834947 | -0.763422 |
| N                           | -2.116155 | -0.235537 | 1.690677  |
| H                           | -2.791134 | -0.996409 | 1.658909  |
| H                           | -1.294096 | -0.569513 | 2.179643  |
| H                           | -0.790443 | 0.673149  | 0.349315  |
| C                           | -2.717230 | 1.406016  | -0.016625 |
| O                           | -2.848704 | 1.846993  | -1.136991 |
| O                           | -3.340855 | 1.936234  | 1.037444  |
| H                           | -3.077276 | 1.354527  | 1.796442  |
| H                           | -1.534582 | -0.381846 | -1.721268 |
| H                           | -1.032036 | -1.586621 | -0.525734 |
| S                           | -3.366524 | -1.767194 | -0.936311 |
| H                           | -4.098324 | -0.747971 | -1.431122 |
| C                           | 2.541741  | 0.964553  | -0.036203 |
| C                           | 2.258871  | 0.314464  | 1.332217  |
| N                           | 1.333347  | 1.059873  | -0.838303 |
| H                           | 1.104621  | 0.147612  | -1.223403 |
| H                           | 1.482029  | 1.677124  | -1.630128 |
| H                           | 2.900056  | 1.976856  | 0.177706  |
| C                           | 3.692768  | 0.239094  | -0.741428 |
| O                           | 3.597825  | -0.360654 | -1.786297 |
| O                           | 4.839977  | 0.334356  | -0.042955 |
| H                           | 5.536727  | -0.152651 | -0.511761 |
| H                           | 3.160659  | 0.285233  | 1.941039  |
| H                           | 1.510252  | 0.914641  | 1.848822  |
| S                           | 1.528978  | -1.376688 | 1.250883  |
| H                           | 2.633941  | -2.032441 | 0.841674  |
| 28                          |           |           |           |
| Dimer 207 of the n...n type |           |           |           |
| C                           | -2.253366 | 0.623432  | 0.452054  |
| C                           | -2.443396 | -0.767728 | 1.067733  |
| N                           | -3.396793 | 1.535387  | 0.532249  |
| H                           | -4.273981 | 1.024502  | 0.464303  |
| H                           | -3.400664 | 2.056436  | 1.401032  |
| H                           | -1.408785 | 1.096503  | 0.966433  |
| C                           | -1.788197 | 0.536582  | -1.012314 |
| O                           | -1.028784 | -0.310474 | -1.427872 |
| O                           | -2.268406 | 1.509323  | -1.786061 |
| H                           | -2.883869 | 2.013812  | -1.193784 |
| H                           | -1.530652 | -1.352612 | 0.970232  |
| H                           | -2.676945 | -0.663761 | 2.127414  |
| S                           | -3.847326 | -1.726114 | 0.353180  |
| H                           | -3.279070 | -1.963791 | -0.846633 |
| C                           | 2.884676  | -0.736235 | 0.788354  |
| C                           | 1.483895  | -0.104379 | 0.866026  |
| N                           | 3.786343  | -0.144923 | 1.762278  |
| H                           | 3.949602  | 0.831801  | 1.531715  |
| H                           | 4.690809  | -0.604582 | 1.730003  |
| H                           | 2.753638  | -1.796502 | 1.033676  |
| C                           | 3.414038  | -0.700546 | -0.650057 |
| O                           | 4.424761  | -0.141884 | -1.006051 |
| O                           | 2.609081  | -1.379006 | -1.490359 |
| H                           | 2.973722  | -1.325022 | -2.388258 |
| H                           | 0.789874  | -0.610346 | 0.198116  |
| H                           | 1.123629  | -0.193251 | 1.890726  |
| S                           | 1.428675  | 1.702855  | 0.491655  |
| H                           | 1.465146  | 1.595283  | -0.852050 |

| Nov 11, 22 15:56            | dimers_structures.xyz | Page 91/325 |
|-----------------------------|-----------------------|-------------|
| 28                          |                       |             |
| Dimer 208 of the n...n type |                       |             |
| C -1.941631                 | -0.806398             | -0.274097   |
| C -1.666316                 | 0.548004              | -0.939698   |
| N -3.045266                 | -1.592479             | -0.830481   |
| H -3.772776                 | -0.986470             | -1.202261   |
| H -2.733513                 | -2.206840             | -1.573080   |
| H -1.022009                 | -1.394419             | -0.362544   |
| C -2.152022                 | -0.652583             | 1.242737    |
| O -1.507882                 | 0.105509              | 1.934135    |
| O -3.086674                 | -1.460559             | 1.740723    |
| H -3.450121                 | -1.932001             | 0.945973    |
| H -0.839986                 | 1.052532              | -0.443391   |
| H -1.399591                 | 0.389665              | -1.984617   |
| S -3.114717                 | 1.688385              | -0.973723   |
| H -3.129899                 | 1.962331              | 0.346914    |
| C 2.828859                  | -0.665245             | 0.597908    |
| C 1.844918                  | 0.393047              | 1.125807    |
| N 4.205833                  | -0.283559             | 0.858588    |
| H 4.432260                  | 0.564116              | 0.345056    |
| H 4.841278                  | -1.002698             | 0.527853    |
| H 2.610405                  | -1.585802             | 1.151433    |
| C 2.542789                  | -0.984806             | -0.874179   |
| O 3.323042                  | -0.835478             | -1.783709   |
| O 1.293206                  | -1.464304             | -1.047136   |
| H 1.156639                  | -1.648046             | -1.990758   |
| H 0.816015                  | 0.048241              | 1.055344    |
| H 2.070035                  | 0.575864              | 2.176459    |
| S 1.982468                  | 2.051363              | 0.328189    |
| H 1.500145                  | 1.706373              | -0.883542   |
| 28                          |                       |             |
| Dimer 209 of the n...n type |                       |             |
| C -2.941695                 | 0.712978              | -0.449833   |
| C -2.219524                 | -0.360047             | -1.274317   |
| N -2.105061                 | 1.530598              | 0.432769    |
| H -1.336919                 | 0.980828              | 0.809502    |
| H -1.710970                 | 2.326075              | -0.055484   |
| H -3.435692                 | 1.385364              | -1.160632   |
| C -4.095735                 | 0.113265              | 0.375993    |
| O -4.810374                 | -0.781630             | -0.016265   |
| O -4.263107                 | 0.695500              | 1.563830    |
| H -3.521895                 | 1.351978              | 1.623971    |
| H -2.930511                 | -0.897390             | -1.899383   |
| H -1.475256                 | 0.117234              | -1.911349   |
| S -1.264441                 | -1.573117             | -0.266834   |
| H -2.326073                 | -2.203584             | 0.275983    |
| C 3.095191                  | 0.602283              | 0.874174    |
| C 1.669386                  | 0.844359              | 0.350167    |
| N 3.998280                  | 1.661653              | 0.459726    |
| H 4.093544                  | 1.656987              | -0.552498   |
| H 4.926271                  | 1.503540              | 0.839373    |
| H 3.023440                  | 0.613188              | 1.968137    |
| C 3.575233                  | -0.806447             | 0.502901    |
| O 4.572597                  | -1.056872             | -0.131382   |
| O 2.742918                  | -1.753311             | 0.977885    |
| H 3.079248                  | -2.626980             | 0.721404    |
| H 0.981721                  | 0.103835              | 0.753946    |
| H 1.348966                  | 1.837017              | 0.665637    |
| S 1.512510                  | 0.855249              | -1.488055   |
| H 1.629066                  | -0.475807             | -1.674895   |
| 28                          |                       |             |
| Dimer 210 of the n...n type |                       |             |
| C -2.001375                 | -0.500579             | -0.132975   |
| C -3.431449                 | -0.829660             | -0.579318   |
| N -1.657491                 | -0.846621             | 1.249762    |
| H -2.468408                 | -0.756880             | 1.858096    |
| H -1.316044                 | -1.797753             | 1.322799    |
| H -1.319952                 | -1.041749             | -0.796285   |
| C -1.665323                 | 0.982272              | -0.376103   |

| Nov 11, 22 15:56            | dimers_structures.xyz | Page 92/325 |
|-----------------------------|-----------------------|-------------|
| O -1.997972                 | 1.592399              | -1.366829   |
| O -0.946722                 | 1.539743              | 0.600053    |
| H -0.853592                 | 0.822204              | 1.277932    |
| H -3.576465                 | -0.539151             | -1.618421   |
| H -3.599192                 | -1.903151             | -0.491259   |
| S -4.745821                 | -0.050328             | 0.453720    |
| H -4.538617                 | 1.217821              | 0.043835    |
| C 2.123063                  | -0.665269             | 0.662068    |
| C 2.381829                  | 0.845838              | 0.796244    |
| N 3.098349                  | -1.438025             | 1.411182    |
| H 4.024475                  | -1.301896             | 1.014291    |
| H 2.894659                  | -2.429757             | 1.338030    |
| H 1.131914                  | -0.845400             | 1.095215    |
| C 2.014004                  | -1.066482             | -0.813666   |
| O 2.700011                  | -1.893614             | -1.364428   |
| O 1.039341                  | -0.377092             | -1.442800   |
| H 1.006690                  | -0.652671             | -2.373151   |
| H 1.577957                  | 1.417201              | 0.338538    |
| H 2.425323                  | 1.092857              | 1.856805    |
| S 3.995267                  | 1.417138              | 0.106176    |
| H 3.652347                  | 1.353684              | -1.196847   |
| 28                          |                       |             |
| Dimer 211 of the n...n type |                       |             |
| C 1.893448                  | 0.583389              | 0.255222    |
| C 3.376221                  | 0.843904              | 0.558289    |
| N 1.183456                  | -0.276168             | 1.201697    |
| H 1.739575                  | -1.102005             | 1.414654    |
| H 1.042094                  | 0.216850              | 2.077623    |
| H 1.384709                  | 1.555129              | 0.260330    |
| C 1.703631                  | 0.068711              | -1.178768   |
| O 2.420459                  | 0.398817              | -2.097914   |
| O 0.668303                  | -0.748554             | -1.371447   |
| H 0.203534                  | -0.891622             | -0.519599   |
| H 3.797283                  | 1.540785              | -0.164273   |
| H 3.465586                  | 1.279239              | 1.553929    |
| S 4.417343                  | -0.678035             | 0.599497    |
| H 4.401050                  | -0.909136             | -0.728829   |
| C -3.040521                 | -0.170301             | 0.988309    |
| C -3.173026                 | 1.258859              | 0.425417    |
| N -2.003810                 | -0.253357             | 2.001083    |
| H -1.083811                 | -0.218094             | 1.565582    |
| H -2.058795                 | -1.145879             | 2.481807    |
| H -4.006217                 | -0.402554             | 1.449448    |
| C -2.857584                 | -1.166968             | -0.159645   |
| O -1.840929                 | -1.784140             | -0.386232   |
| O -3.963755                 | -1.268603             | -0.916360   |
| H -3.792305                 | -1.884072             | -1.647620   |
| H -4.010838                 | 1.323646              | -0.266967   |
| H -3.355730                 | 1.936137              | 1.259237    |
| S -1.662510                 | 1.923487              | -0.398359   |
| H -1.746624                 | 1.195293              | -1.530324   |
| 28                          |                       |             |
| Dimer 212 of the n...n type |                       |             |
| C -2.151313                 | -0.588539             | 0.278172    |
| C -1.917203                 | 0.748609              | 0.993553    |
| N -1.460568                 | -0.779901             | -0.997772   |
| H -1.382122                 | 0.098399              | -1.504740   |
| H -0.532266                 | -1.168749             | -0.873301   |
| H -1.819669                 | -1.379410             | 0.961064    |
| C -3.655317                 | -0.859279             | 0.075238    |
| O -4.508943                 | -0.566291             | 0.882395    |
| O -3.933925                 | -1.481443             | -1.069999   |
| H -3.056015                 | -1.549604             | -1.529840   |
| H -2.488983                 | 0.784746              | 1.919097    |
| H -0.860683                 | 0.851296              | 1.238980    |
| S -2.318947                 | 2.233539              | -0.022118   |
| H -3.658488                 | 2.075683              | -0.008917   |
| C 2.250148                  | -0.143725             | 0.921518    |
| C 1.956631                  | 0.995998              | -0.071322   |

| Nov 11, 22 15:56            |           |           |           | dimers_structures.xyz | Page 93/325 |
|-----------------------------|-----------|-----------|-----------|-----------------------|-------------|
| N                           | 3.279727  | 0.238062  | 1.870558  |                       |             |
| H                           | 4.162348  | 0.378395  | 1.386135  |                       |             |
| H                           | 3.432077  | -0.503691 | 2.546374  |                       |             |
| H                           | 1.319711  | -0.320597 | 1.473368  |                       |             |
| C                           | 2.545360  | -1.450294 | 0.175452  |                       |             |
| O                           | 3.568772  | -2.083687 | 0.254310  |                       |             |
| O                           | 1.503980  | -1.827551 | -0.600536 |                       |             |
| H                           | 1.729767  | -2.653708 | -1.058015 |                       |             |
| H                           | 1.115859  | 0.746394  | -0.714121 |                       |             |
| H                           | 1.706490  | 1.890972  | 0.497890  |                       |             |
| S                           | 3.383816  | 1.489492  | -1.130637 |                       |             |
| H                           | 3.351035  | 0.429403  | -1.964423 |                       |             |
| 28                          |           |           |           |                       |             |
| Dimer 213 of the n...n type |           |           |           |                       |             |
| C                           | 3.164855  | 0.407757  | 0.223228  |                       |             |
| C                           | 3.266530  | -0.992172 | -0.396770 |                       |             |
| N                           | 3.099337  | 0.466822  | 1.686290  |                       |             |
| H                           | 2.607077  | -0.341415 | 2.060092  |                       |             |
| H                           | 4.021728  | 0.497301  | 2.104220  |                       |             |
| H                           | 4.050412  | 0.968811  | -0.097251 |                       |             |
| C                           | 1.977775  | 1.199812  | -0.354861 |                       |             |
| O                           | 1.622360  | 1.143097  | -1.509443 |                       |             |
| O                           | 1.376269  | 1.987885  | 0.540642  |                       |             |
| H                           | 1.845825  | 1.791772  | 1.394177  |                       |             |
| H                           | 3.314364  | -0.922498 | -1.482068 |                       |             |
| H                           | 4.175941  | -1.474989 | -0.039349 |                       |             |
| S                           | 1.891154  | -2.129229 | 0.071010  |                       |             |
| H                           | 0.953839  | -1.603709 | -0.744715 |                       |             |
| C                           | -1.439054 | 0.237375  | 0.460393  |                       |             |
| C                           | -2.395848 | -0.864723 | 0.951149  |                       |             |
| N                           | -1.689039 | 1.502663  | 1.124361  |                       |             |
| H                           | -2.575678 | 1.889775  | 0.814045  |                       |             |
| H                           | -0.962770 | 2.166339  | 0.873732  |                       |             |
| H                           | -0.432762 | -0.099717 | 0.728820  |                       |             |
| C                           | -1.473665 | 0.321357  | -1.069221 |                       |             |
| O                           | -1.875358 | 1.262985  | -1.708505 |                       |             |
| O                           | -1.016536 | -0.816042 | -1.635765 |                       |             |
| H                           | -1.050417 | -0.723950 | -2.601484 |                       |             |
| H                           | -2.122530 | -1.829014 | 0.526615  |                       |             |
| H                           | -2.318202 | -0.925437 | 2.036378  |                       |             |
| S                           | -4.183499 | -0.549618 | 0.621346  |                       |             |
| H                           | -4.158846 | -0.797951 | -0.704414 |                       |             |
| 28                          |           |           |           |                       |             |
| Dimer 214 of the n...n type |           |           |           |                       |             |
| C                           | 2.875508  | -0.162881 | -0.749221 |                       |             |
| C                           | 2.083359  | -1.404728 | -0.321045 |                       |             |
| N                           | 4.171616  | 0.034650  | -0.094389 |                       |             |
| H                           | 4.155404  | -0.322400 | 0.858019  |                       |             |
| H                           | 4.921032  | -0.428007 | -0.594816 |                       |             |
| H                           | 3.049835  | -0.247186 | -1.827917 |                       |             |
| C                           | 2.046155  | 1.125062  | -0.591236 |                       |             |
| O                           | 0.859060  | 1.200651  | -0.831671 |                       |             |
| O                           | 2.754828  | 2.172533  | -0.182992 |                       |             |
| H                           | 3.666766  | 1.806860  | -0.031433 |                       |             |
| H                           | 1.159944  | -1.484060 | -0.891044 |                       |             |
| H                           | 2.683127  | -2.294130 | -0.515166 |                       |             |
| S                           | 1.688611  | -1.469931 | 1.479401  |                       |             |
| H                           | 0.765145  | -0.486516 | 1.477975  |                       |             |
| C                           | -2.987890 | -0.142932 | 0.736445  |                       |             |
| C                           | -2.199866 | -1.334189 | 0.158959  |                       |             |
| N                           | -4.301747 | -0.037946 | 0.123800  |                       |             |
| H                           | -4.201905 | 0.174715  | -0.865478 |                       |             |
| H                           | -4.821232 | 0.732148  | 0.533280  |                       |             |
| H                           | -3.113691 | -0.345570 | 1.805856  |                       |             |
| C                           | -2.149952 | 1.134586  | 0.629195  |                       |             |
| O                           | -2.435144 | 2.097246  | -0.042584 |                       |             |
| O                           | -1.023410 | 1.055975  | 1.364689  |                       |             |
| H                           | -0.455174 | 1.810046  | 1.134115  |                       |             |
| H                           | -1.289360 | -1.508567 | 0.727760  |                       |             |

| Nov 11, 22 15:56            |           |           |           | dimers_structures.xyz | Page 94/325 |
|-----------------------------|-----------|-----------|-----------|-----------------------|-------------|
| H                           | -2.825610 | -2.223763 | 0.225537  |                       |             |
| S                           | -1.765154 | -1.181369 | -1.629170 |                       |             |
| H                           | -0.805235 | -0.240450 | -1.484395 |                       |             |
| 28                          |           |           |           |                       |             |
| Dimer 215 of the n...n type |           |           |           |                       |             |
| C                           | 1.997865  | 0.820989  | -0.175788 |                       |             |
| C                           | 1.867792  | -0.424305 | -1.060705 |                       |             |
| N                           | 3.107168  | 1.726882  | -0.485338 |                       |             |
| H                           | 3.909376  | 1.212105  | -0.840779 |                       |             |
| H                           | 2.844470  | 2.419913  | -1.175880 |                       |             |
| H                           | 1.061387  | 1.378924  | -0.279361 |                       |             |
| C                           | 2.061637  | 0.447760  | 1.315495  |                       |             |
| O                           | 1.416503  | -0.449924 | 1.811087  |                       |             |
| O                           | 2.870191  | 1.228660  | 2.030947  |                       |             |
| H                           | 3.281461  | 1.834596  | 1.360941  |                       |             |
| H                           | 0.998161  | -1.008427 | -0.767194 |                       |             |
| H                           | 1.740736  | -0.115489 | -2.098300 |                       |             |
| S                           | 3.356106  | -1.513437 | -1.059785 |                       |             |
| H                           | 3.213553  | -1.970323 | 0.201213  |                       |             |
| C                           | -2.613206 | 0.788628  | 0.510576  |                       |             |
| C                           | -1.918106 | -0.464380 | 1.067500  |                       |             |
| N                           | -4.009704 | 0.839623  | 0.910284  |                       |             |
| H                           | -4.511366 | 0.053270  | 0.505256  |                       |             |
| H                           | -4.449881 | 1.679237  | 0.547183  |                       |             |
| H                           | -2.093339 | 1.647965  | 0.951626  |                       |             |
| C                           | -2.402347 | 0.913139  | -1.003147 |                       |             |
| O                           | -3.283073 | 1.035574  | -1.820359 |                       |             |
| O                           | -1.094145 | 0.879884  | -1.330670 |                       |             |
| H                           | -1.009636 | 0.972080  | -2.293513 |                       |             |
| H                           | -0.841656 | -0.419231 | 0.924908  |                       |             |
| H                           | -2.117638 | -0.517424 | 2.137616  |                       |             |
| S                           | -2.543792 | -2.061645 | 0.385945  |                       |             |
| H                           | -1.942515 | -1.975972 | -0.818525 |                       |             |
| 28                          |           |           |           |                       |             |
| Dimer 216 of the n...n type |           |           |           |                       |             |
| C                           | 2.577640  | -0.337075 | -0.770676 |                       |             |
| C                           | 1.730707  | 0.931029  | -0.604432 |                       |             |
| N                           | 2.017233  | -1.577666 | -0.229905 |                       |             |
| H                           | 1.488803  | -1.402110 | 0.621103  |                       |             |
| H                           | 1.414504  | -2.046906 | -0.895083 |                       |             |
| H                           | 2.730968  | -0.480408 | -1.846534 |                       |             |
| C                           | 3.997746  | -0.145295 | -0.203550 |                       |             |
| O                           | 4.618479  | 0.891064  | -0.279611 |                       |             |
| O                           | 4.504862  | -1.243992 | 0.356500  |                       |             |
| H                           | 3.770707  | -1.908558 | 0.309008  |                       |             |
| H                           | 2.249964  | 1.786964  | -1.032039 |                       |             |
| H                           | 0.779258  | 0.810000  | -1.121245 |                       |             |
| S                           | 1.277100  | 1.315702  | 1.141004  |                       |             |
| H                           | 2.510114  | 1.667664  | 1.558893  |                       |             |
| C                           | -2.473847 | 0.488560  | 0.716368  |                       |             |
| C                           | -1.747386 | -0.863153 | 0.614679  |                       |             |
| N                           | -3.639815 | 0.398391  | 1.576925  |                       |             |
| H                           | -4.324637 | -0.230680 | 1.165748  |                       |             |
| H                           | -4.089862 | 1.304556  | 1.657379  |                       |             |
| H                           | -1.758712 | 1.184988  | 1.170582  |                       |             |
| C                           | -2.770576 | 1.056786  | -0.676778 |                       |             |
| O                           | -3.858914 | 1.398429  | -1.072678 |                       |             |
| O                           | -1.650899 | 1.144676  | -1.424051 |                       |             |
| H                           | -1.876355 | 1.518718  | -2.290989 |                       |             |
| H                           | -0.819401 | -0.759364 | 0.059116  |                       |             |
| H                           | -1.514719 | -1.208291 | 1.621481  |                       |             |
| S                           | -2.736122 | -2.221649 | -0.145948 |                       |             |
| H                           | -2.652123 | -1.793036 | -1.422397 |                       |             |
| 28                          |           |           |           |                       |             |
| Dimer 217 of the n...n type |           |           |           |                       |             |
| C                           | 2.071619  | -0.390928 | -0.064761 |                       |             |
| C                           | 2.156088  | 1.006504  | -0.691069 |                       |             |
| N                           | 1.535509  | -0.465363 | 1.295824  |                       |             |
| H                           | 1.743720  | 0.380315  | 1.820222  |                       |             |



| Nov 11, 22 15:56            |           |           |           | dimers_structures.xyz | Page 95/325 |
|-----------------------------|-----------|-----------|-----------|-----------------------|-------------|
| H                           | 0.532270  | -0.608292 | 1.286260  |                       |             |
| H                           | 1.423795  | -0.993223 | -0.711636 |                       |             |
| C                           | 3.435237  | -1.107871 | -0.104926 |                       |             |
| O                           | 4.207320  | -1.037215 | -1.035303 |                       |             |
| O                           | 3.678627  | -1.847168 | 0.976547  |                       |             |
| H                           | 2.897189  | -1.674985 | 1.566736  |                       |             |
| H                           | 2.556619  | 0.942527  | -1.701291 |                       |             |
| H                           | 1.158833  | 1.442926  | -0.741193 |                       |             |
| S                           | 3.158488  | 2.212607  | 0.278796  |                       |             |
| H                           | 4.361434  | 1.658777  | 0.022947  |                       |             |
| C                           | -2.261086 | 0.650404  | -0.460067 |                       |             |
| C                           | -2.906160 | 0.757376  | 0.933741  |                       |             |
| N                           | -3.032535 | 1.371211  | -1.456410 |                       |             |
| H                           | -3.944516 | 0.935929  | -1.567810 |                       |             |
| H                           | -2.574728 | 1.323175  | -2.361008 |                       |             |
| H                           | -1.276103 | 1.122716  | -0.375639 |                       |             |
| C                           | -1.996481 | -0.815338 | -0.822666 |                       |             |
| O                           | -2.436494 | -1.385722 | -1.790234 |                       |             |
| O                           | -1.195037 | -1.416846 | 0.085462  |                       |             |
| H                           | -1.067410 | -2.344735 | -0.171077 |                       |             |
| H                           | -2.263734 | 0.316535  | 1.693090  |                       |             |
| H                           | -3.048403 | 1.812569  | 1.165230  |                       |             |
| S                           | -4.586969 | 0.007562  | 1.064497  |                       |             |
| H                           | -4.194705 | -1.283155 | 1.073292  |                       |             |
| 28                          |           |           |           |                       |             |
| Dimer 218 of the n...n type |           |           |           |                       |             |
| C                           | 2.921883  | 0.604426  | 0.516841  |                       |             |
| C                           | 1.703368  | -0.278551 | 0.808694  |                       |             |
| N                           | 2.735988  | 1.645906  | -0.497940 |                       |             |
| H                           | 2.083733  | 1.338341  | -1.215467 |                       |             |
| H                           | 2.376017  | 2.502250  | -0.093725 |                       |             |
| C                           | 3.197587  | 1.095430  | 1.457236  |                       |             |
| C                           | 4.156720  | -0.238126 | 0.145295  |                       |             |
| O                           | 4.431994  | -1.295574 | 0.666578  |                       |             |
| O                           | 4.924546  | 0.321439  | -0.790118 |                       |             |
| H                           | 4.436214  | 1.145891  | -1.048318 |                       |             |
| H                           | 1.935597  | -1.004143 | 1.585948  |                       |             |
| H                           | 0.878465  | 0.346707  | 1.147550  |                       |             |
| S                           | 1.055178  | -1.173709 | -0.668724 |                       |             |
| H                           | 2.005880  | -2.130090 | -0.697279 |                       |             |
| C                           | -3.153998 | -0.249528 | 0.964506  |                       |             |
| C                           | -2.789587 | 1.246353  | 0.961578  |                       |             |
| N                           | -2.048419 | -1.071837 | 1.423962  |                       |             |
| H                           | -1.313765 | -1.101945 | 0.721227  |                       |             |
| H                           | -2.356162 | -2.030542 | 1.552732  |                       |             |
| H                           | -3.982649 | -0.354872 | 1.674244  |                       |             |
| C                           | -3.715816 | -0.670643 | -0.399078 |                       |             |
| O                           | -3.253850 | -1.535631 | -1.104834 |                       |             |
| O                           | -4.805822 | 0.049654  | -0.730000 |                       |             |
| H                           | -5.126257 | -0.244757 | -1.597745 |                       |             |
| H                           | -3.663395 | 1.854138  | 0.735049  |                       |             |
| H                           | -2.424508 | 1.512042  | 1.953351  |                       |             |
| S                           | -1.422016 | 1.716635  | -0.183633 |                       |             |
| H                           | -2.100694 | 1.563559  | -1.339281 |                       |             |
| 28                          |           |           |           |                       |             |
| Dimer 219 of the n...n type |           |           |           |                       |             |
| C                           | -2.332902 | -0.725290 | 0.312428  |                       |             |
| C                           | -3.460046 | -0.802553 | -0.723190 |                       |             |
| N                           | -2.736805 | -0.740278 | 1.720655  |                       |             |
| H                           | -3.635954 | -0.281428 | 1.846375  |                       |             |
| H                           | -2.808388 | -1.684242 | 2.081198  |                       |             |
| H                           | -1.672647 | -1.583104 | 0.141948  |                       |             |
| C                           | -1.421604 | 0.491337  | 0.070837  |                       |             |
| O                           | -1.110260 | 0.893437  | -1.027890 |                       |             |
| O                           | -0.961213 | 1.046089  | 1.193104  |                       |             |
| H                           | -1.413166 | 0.539823  | 1.918280  |                       |             |
| H                           | -3.047018 | -0.797033 | -1.730462 |                       |             |
| H                           | -4.017442 | -1.728366 | -0.580485 |                       |             |
| S                           | -4.713131 | 0.543197  | -0.578925 |                       |             |

| Nov 11, 22 15:56            |           |           |           | dimers_structures.xyz | Page 96/325 |
|-----------------------------|-----------|-----------|-----------|-----------------------|-------------|
| H                           | -3.918528 | 1.544291  | -1.009695 |                       |             |
| C                           | 3.332492  | -0.023452 | -0.909332 |                       |             |
| C                           | 1.953362  | -0.687513 | -1.074518 |                       |             |
| N                           | 4.379075  | -1.014631 | -0.729272 |                       |             |
| H                           | 4.234405  | -1.514469 | 0.144061  |                       |             |
| H                           | 5.285729  | -0.563535 | -0.660094 |                       |             |
| H                           | 3.521966  | 0.519933  | -1.841779 |                       |             |
| C                           | 3.280418  | 1.037111  | 0.196471  |                       |             |
| O                           | 3.904013  | 0.996524  | 1.231103  |                       |             |
| O                           | 2.437072  | 2.038295  | -0.120022 |                       |             |
| H                           | 2.414435  | 2.675028  | 0.612245  |                       |             |
| H                           | 1.187639  | 0.052928  | -1.297027 |                       |             |
| H                           | 2.009380  | -1.397032 | -1.899848 |                       |             |
| S                           | 1.400340  | -1.691385 | 0.372690  |                       |             |
| H                           | 1.101144  | -0.660008 | 1.188813  |                       |             |
| 28                          |           |           |           |                       |             |
| Dimer 220 of the n...n type |           |           |           |                       |             |
| C                           | -2.820703 | -0.660774 | 0.805038  |                       |             |
| C                           | -2.368197 | 0.716084  | 1.306118  |                       |             |
| N                           | -1.826219 | -1.452407 | 0.077802  |                       |             |
| H                           | -1.189550 | -0.865612 | -0.459135 |                       |             |
| H                           | -1.269550 | -2.022645 | 0.703093  |                       |             |
| H                           | -3.129455 | -1.235872 | 1.685859  |                       |             |
| C                           | -4.097057 | -0.558847 | -0.052443 |                       |             |
| O                           | -5.004936 | 0.208450  | 0.178788  |                       |             |
| O                           | -4.128191 | -1.423199 | -1.066322 |                       |             |
| H                           | -3.246802 | -1.879889 | -1.023384 |                       |             |
| H                           | -3.161903 | 1.187000  | 1.883571  |                       |             |
| H                           | -1.496907 | 0.594822  | 1.949983  |                       |             |
| S                           | -1.832833 | 1.873444  | -0.026006 |                       |             |
| H                           | -3.059353 | 2.099542  | -0.538624 |                       |             |
| C                           | 3.171233  | 0.761806  | 0.404497  |                       |             |
| C                           | 1.684422  | 0.443571  | 0.173055  |                       |             |
| N                           | 3.666466  | 1.711123  | -0.576907 |                       |             |
| H                           | 3.636054  | 1.295881  | -1.504403 |                       |             |
| H                           | 4.638933  | 1.934883  | -0.391304 |                       |             |
| H                           | 3.231708  | 1.223237  | 1.397217  |                       |             |
| C                           | 3.997469  | -0.527416 | 0.495442  |                       |             |
| O                           | 4.943104  | -0.797896 | -0.206161 |                       |             |
| O                           | 3.543728  | -1.338730 | 1.470924  |                       |             |
| H                           | 4.093833  | -2.138160 | 1.497553  |                       |             |
| H                           | 1.292139  | -0.176944 | 0.976221  |                       |             |
| H                           | 1.130257  | 1.381116  | 0.150628  |                       |             |
| S                           | 1.308743  | -0.364713 | -1.442821 |                       |             |
| H                           | 1.801655  | -1.583603 | -1.140389 |                       |             |
| 28                          |           |           |           |                       |             |
| Dimer 221 of the n...n type |           |           |           |                       |             |
| C                           | -1.834786 | -0.117466 | -0.280579 |                       |             |
| C                           | -3.081590 | -0.598325 | -1.033184 |                       |             |
| N                           | -1.417525 | -0.925667 | 0.867414  |                       |             |
| H                           | -2.218489 | -1.354464 | 1.324531  |                       |             |
| H                           | -0.776336 | -1.656352 | 0.581486  |                       |             |
| H                           | -1.007548 | -0.114502 | -0.998727 |                       |             |
| C                           | -1.976005 | 1.350744  | 0.163081  |                       |             |
| O                           | -2.489663 | 2.212370  | -0.514699 |                       |             |
| O                           | -1.447261 | 1.601791  | 1.361347  |                       |             |
| H                           | -1.143362 | 0.714592  | 1.685962  |                       |             |
| H                           | -3.292078 | 0.060571  | -1.873774 |                       |             |
| H                           | -2.905890 | -1.604382 | -1.414453 |                       |             |
| S                           | -4.592151 | -0.736997 | 0.015961  |                       |             |
| H                           | -4.785554 | 0.586445  | 0.190388  |                       |             |
| C                           | 2.250861  | -0.310911 | 0.835635  |                       |             |
| C                           | 2.121656  | 1.039615  | 0.105253  |                       |             |
| N                           | 3.369354  | -0.304661 | 1.760528  |                       |             |
| H                           | 4.242991  | -0.221564 | 1.247589  |                       |             |
| H                           | 3.411823  | -1.179938 | 2.272701  |                       |             |
| H                           | 1.323815  | -0.437857 | 1.405635  |                       |             |
| C                           | 2.285170  | -1.458923 | -0.178701 |                       |             |
| O                           | 3.218832  | -2.199101 | -0.369055 |                       |             |

| Nov 11, 22 15:56            |           |           |           | dimers_structures.xyz | Page 97/325 |
|-----------------------------|-----------|-----------|-----------|-----------------------|-------------|
| O                           | 1.120160  | -1.547973 | -0.859816 |                       |             |
| H                           | 1.184540  | -2.267807 | -1.508209 |                       |             |
| H                           | 1.237755  | 1.054126  | -0.528611 |                       |             |
| H                           | 2.025998  | 1.825653  | 0.853611  |                       |             |
| S                           | 3.583703  | 1.522419  | -0.910162 |                       |             |
| H                           | 3.366314  | 0.675926  | -1.937759 |                       |             |
| 28                          |           |           |           |                       |             |
| Dimer 222 of the n...n type |           |           |           |                       |             |
| C                           | 1.717491  | 0.177419  | -0.170045 |                       |             |
| C                           | 2.842453  | 1.072571  | -0.704793 |                       |             |
| N                           | 1.250492  | 0.462250  | 1.188009  |                       |             |
| H                           | 2.013406  | 0.794120  | 1.773148  |                       |             |
| H                           | 0.518198  | 1.163233  | 1.181620  |                       |             |
| H                           | 0.865048  | 0.299439  | -0.847194 |                       |             |
| C                           | 2.085070  | -1.314605 | -0.274442 |                       |             |
| O                           | 2.687456  | -1.794852 | -1.208325 |                       |             |
| O                           | 1.651663  | -2.048090 | 0.750861  |                       |             |
| H                           | 1.229804  | -1.393021 | 1.363772  |                       |             |
| H                           | 3.098920  | 0.788818  | -1.724018 |                       |             |
| H                           | 2.506177  | 2.109605  | -0.705837 |                       |             |
| S                           | 4.371309  | 1.061606  | 0.326455  |                       |             |
| H                           | 4.759029  | -0.192982 | 0.018770  |                       |             |
| C                           | -3.101456 | 0.508551  | 0.763345  |                       |             |
| C                           | -2.236818 | -0.751114 | 0.950263  |                       |             |
| N                           | -4.499324 | 0.163093  | 0.574377  |                       |             |
| H                           | -4.610768 | -0.364428 | -0.287567 |                       |             |
| H                           | -5.061537 | 1.002488  | 0.476385  |                       |             |
| H                           | -3.006039 | 1.083102  | 1.692182  |                       |             |
| C                           | -2.534392 | 1.409592  | -0.340049 |                       |             |
| O                           | -3.122731 | 1.740910  | -1.340019 |                       |             |
| O                           | -1.274939 | 1.817510  | -0.061551 |                       |             |
| H                           | -0.971908 | 2.402404  | -0.775145 |                       |             |
| H                           | -1.215276 | -0.487435 | 1.213477  |                       |             |
| H                           | -2.662310 | -1.337597 | 1.764331  |                       |             |
| S                           | -2.211717 | -1.901138 | -0.492044 |                       |             |
| H                           | -1.440059 | -1.150949 | -1.304610 |                       |             |
| 28                          |           |           |           |                       |             |
| Dimer 223 of the n...n type |           |           |           |                       |             |
| C                           | -2.037310 | -0.753976 | -0.280215 |                       |             |
| C                           | -2.079839 | 0.580444  | -1.033400 |                       |             |
| N                           | -3.140087 | -1.684576 | -0.535187 |                       |             |
| H                           | -4.008077 | -1.181178 | -0.702884 |                       |             |
| H                           | -2.955700 | -2.273280 | -1.338738 |                       |             |
| H                           | -1.102312 | -1.245940 | -0.568000 |                       |             |
| C                           | -1.908478 | -0.541824 | 1.238308  |                       |             |
| O                           | -1.260706 | 0.348955  | 1.742061  |                       |             |
| O                           | -2.552278 | -1.456537 | 1.963974  |                       |             |
| H                           | -3.022670 | -2.015819 | 1.293079  |                       |             |
| H                           | -1.199638 | 1.173848  | -0.795652 |                       |             |
| H                           | -2.086133 | 0.386468  | -2.106262 |                       |             |
| S                           | -3.594749 | 1.582599  | -0.714064 |                       |             |
| H                           | -3.293757 | 1.918285  | 0.557040  |                       |             |
| C                           | 2.391659  | -0.833866 | 0.379968  |                       |             |
| C                           | 2.008739  | 0.500744  | 1.039568  |                       |             |
| N                           | 3.708850  | -1.277139 | 0.806155  |                       |             |
| H                           | 4.410660  | -0.608747 | 0.497850  |                       |             |
| H                           | 3.941821  | -2.161391 | 0.365197  |                       |             |
| H                           | 1.650647  | -1.567340 | 0.721527  |                       |             |
| C                           | 2.230648  | -0.764549 | -1.143578 |                       |             |
| O                           | 3.084129  | -1.056223 | -1.946829 |                       |             |
| O                           | 0.999455  | -0.342284 | -1.497704 |                       |             |
| H                           | 0.939944  | -0.322646 | -2.466537 |                       |             |
| H                           | 0.963205  | 0.738190  | 0.862687  |                       |             |
| H                           | 2.161073  | 0.406604  | 2.114515  |                       |             |
| S                           | 3.052496  | 1.935808  | 0.530285  |                       |             |
| H                           | 2.498323  | 2.117322  | -0.686061 |                       |             |
| 28                          |           |           |           |                       |             |
| Dimer 224 of the n...n type |           |           |           |                       |             |
| C                           | 2.120167  | -0.632514 | 0.409466  |                       |             |

| Nov 11, 22 15:56            |           |           |           | dimers_structures.xyz | Page 98/325 |
|-----------------------------|-----------|-----------|-----------|-----------------------|-------------|
| C                           | 3.608441  | -0.986796 | 0.532988  |                       |             |
| N                           | 1.482854  | -0.940604 | -0.870844 |                       |             |
| H                           | 2.125124  | -0.771372 | -1.641895 |                       |             |
| H                           | 1.191964  | -1.910264 | -0.917518 |                       |             |
| H                           | 1.591192  | -1.192127 | 1.190316  |                       |             |
| C                           | 1.865404  | 0.844865  | 0.759749  |                       |             |
| O                           | 2.461227  | 1.438189  | 1.630425  |                       |             |
| O                           | 0.897601  | 1.421883  | 0.045350  |                       |             |
| H                           | 0.594925  | 0.749411  | -0.612082 |                       |             |
| H                           | 3.975749  | -0.742664 | 1.528196  |                       |             |
| H                           | 3.736773  | -2.056448 | 0.366659  |                       |             |
| S                           | 4.683752  | -0.168718 | -0.722061 |                       |             |
| H                           | 4.609774  | 1.074879  | -0.205457 |                       |             |
| C                           | -2.366677 | 0.584453  | 0.625392  |                       |             |
| C                           | -1.923527 | -0.888192 | 0.667852  |                       |             |
| N                           | -3.482924 | 0.827292  | 1.522313  |                       |             |
| H                           | -4.297340 | 0.305589  | 1.208612  |                       |             |
| H                           | -3.742478 | 1.808406  | 1.504547  |                       |             |
| H                           | -1.506579 | 1.171357  | 0.968662  |                       |             |
| C                           | -2.619333 | 1.037839  | -0.817640 |                       |             |
| O                           | -3.641998 | 1.533373  | -1.225340 |                       |             |
| O                           | -1.539586 | 0.824969  | -1.599794 |                       |             |
| H                           | -1.730928 | 1.134513  | -2.499608 |                       |             |
| H                           | -1.021112 | -1.037114 | 0.079698  |                       |             |
| H                           | -1.716337 | -1.155780 | 1.703528  |                       |             |
| S                           | -3.199181 | -2.096323 | 0.104039  |                       |             |
| H                           | -3.088178 | -1.849773 | -1.217556 |                       |             |
| 28                          |           |           |           |                       |             |
| Dimer 225 of the n...n type |           |           |           |                       |             |
| C                           | 3.190443  | 0.514392  | 0.513701  |                       |             |
| C                           | 3.404738  | -0.984778 | 0.273379  |                       |             |
| N                           | 2.504466  | 0.884311  | 1.754984  |                       |             |
| H                           | 1.823691  | 0.175371  | 2.017820  |                       |             |
| H                           | 3.153570  | 0.999639  | 2.524165  |                       |             |
| H                           | 4.180165  | 0.985536  | 0.521895  |                       |             |
| C                           | 2.459372  | 1.176105  | -0.669954 |                       |             |
| O                           | 2.635568  | 0.876960  | -1.828336 |                       |             |
| O                           | 1.621326  | 2.147615  | -0.298394 |                       |             |
| H                           | 1.658333  | 2.134032  | 0.694989  |                       |             |
| H                           | 3.932366  | -1.143914 | -0.665487 |                       |             |
| H                           | 4.004639  | -1.398032 | 1.084309  |                       |             |
| S                           | 1.849487  | -1.975003 | 0.265421  |                       |             |
| H                           | 1.365014  | -1.498398 | -0.899737 |                       |             |
| C                           | -1.651338 | 0.365564  | 0.449927  |                       |             |
| C                           | -2.994444 | 0.185358  | 1.172602  |                       |             |
| N                           | -1.509598 | 1.710643  | -0.079345 |                       |             |
| H                           | -2.196526 | 1.866555  | -0.812088 |                       |             |
| H                           | -0.592294 | 1.832140  | -0.497320 |                       |             |
| H                           | -0.869962 | 0.208586  | 1.205269  |                       |             |
| C                           | -1.408157 | -0.735496 | -0.590709 |                       |             |
| O                           | -0.948666 | -0.553058 | -1.693865 |                       |             |
| O                           | -1.733227 | -1.956833 | -0.123945 |                       |             |
| H                           | -1.540434 | -2.617469 | -0.808739 |                       |             |
| H                           | -3.035580 | -0.770514 | 1.689662  |                       |             |
| H                           | -3.102812 | 0.985255  | 1.904354  |                       |             |
| S                           | -4.474451 | 0.331367  | 0.078121  |                       |             |
| H                           | -4.348515 | -0.869657 | -0.522596 |                       |             |
| 28                          |           |           |           |                       |             |
| Dimer 226 of the n...n type |           |           |           |                       |             |
| C                           | -1.944143 | -0.175899 | -0.489248 |                       |             |
| C                           | -3.094670 | -1.181079 | -0.625586 |                       |             |
| N                           | -1.063935 | -0.349457 | 0.667127  |                       |             |
| H                           | -1.586099 | -0.688525 | 1.471610  |                       |             |
| H                           | -0.315092 | -1.004221 | 0.470827  |                       |             |
| H                           | -1.330488 | -0.265921 | -1.393486 |                       |             |
| C                           | -2.456518 | 1.276432  | -0.516526 |                       |             |
| O                           | -3.378217 | 1.652420  | -1.205945 |                       |             |
| O                           | -1.768681 | 2.104127  | 0.270082  |                       |             |
| H                           | -1.107897 | 1.525392  | 0.729176  |                       |             |

| Nov 11, 22 15:56            | dimers_structures.xyz |           | Page 99/325 |
|-----------------------------|-----------------------|-----------|-------------|
| H                           | -3.670108             | -0.978705 | -1.527222   |
| H                           | -2.684831             | -2.189016 | -0.692320   |
| S                           | -4.237610             | -1.218112 | 0.821214    |
| H                           | -4.821281             | -0.024318 | 0.590502    |
| C                           | 3.341887              | -0.505851 | 0.732235    |
| C                           | 2.356157              | 0.594408  | 1.159501    |
| N                           | 4.675048              | 0.034307  | 0.528969    |
| H                           | 4.663083              | 0.700418  | -0.239175   |
| H                           | 5.318705              | -0.703702 | 0.262036    |
| H                           | 3.378643              | -1.221365 | 1.562584    |
| C                           | 2.812422              | -1.300404 | -0.468567   |
| O                           | 3.400379              | -1.459565 | -1.510038   |
| O                           | 1.593715              | -1.836502 | -0.226770   |
| H                           | 1.323182              | -2.352400 | -1.004038   |
| H                           | 1.396736              | 0.175146  | 1.451686    |
| H                           | 2.781289              | 1.118006  | 2.015369    |
| S                           | 2.062557              | 1.906711  | -0.102333   |
| H                           | 1.308818              | 1.168193  | -0.941787   |
| 28                          |                       |           |             |
| Dimer 227 of the n...n type |                       |           |             |
| C                           | -2.380660             | -0.796464 | -0.308012   |
| C                           | -1.626889             | -0.405493 | 0.968604    |
| N                           | -1.885781             | -0.210151 | -1.556789   |
| H                           | -1.468968             | 0.703432  | -1.394082   |
| H                           | -1.197885             | -0.802372 | -2.005751   |
| H                           | -2.319314             | -1.886945 | -0.397107   |
| C                           | -3.888991             | -0.503418 | -0.183376   |
| O                           | -4.527544             | -0.685461 | 0.829120    |
| O                           | -4.441983             | -0.054803 | -1.309717   |
| H                           | -3.679721             | 0.025647  | -1.940976   |
| H                           | -2.063453             | -0.904909 | 1.831736    |
| H                           | -0.585206             | -0.712389 | 0.881400    |
| S                           | -1.579852             | 1.410640  | 1.288874    |
| H                           | -2.875119             | 1.544241  | 1.639687    |
| C                           | 3.318060              | 0.069667  | 0.697291    |
| C                           | 2.223392              | 1.126802  | 0.477985    |
| N                           | 4.583063              | 0.489303  | 0.119820    |
| H                           | 4.490173              | 0.577082  | -0.888852   |
| H                           | 5.296217              | -0.213811 | 0.285094    |
| H                           | 3.443729              | -0.018499 | 1.783248    |
| C                           | 2.850780              | -1.313872 | 0.226169    |
| O                           | 3.444429              | -2.019034 | -0.553872   |
| O                           | 1.683129              | -1.669741 | 0.801180    |
| H                           | 1.435914              | -2.554867 | 0.487863    |
| H                           | 1.323731              | 0.868357  | 1.031202    |
| H                           | 2.589079              | 2.085849  | 0.843863    |
| S                           | 1.785880              | 1.430788  | -1.287845   |
| H                           | 1.194995              | 0.241267  | -1.520655   |
| 28                          |                       |           |             |
| Dimer 228 of the n...n type |                       |           |             |
| C                           | -2.598898             | 0.067408  | 0.977428    |
| C                           | -2.909519             | 1.432288  | 0.351176    |
| N                           | -1.240679             | -0.094742 | 1.504052    |
| H                           | -0.588792             | 0.557225  | 1.076072    |
| H                           | -1.207301             | 0.044055  | 2.506569    |
| H                           | -3.312156             | -0.082765 | 1.795303    |
| C                           | -2.901460             | -1.072457 | -0.015630   |
| O                           | -3.890460             | -1.104705 | -0.714250   |
| O                           | -1.986290             | -2.039665 | -0.026779   |
| H                           | -1.286916             | -1.736185 | 0.608144    |
| H                           | -3.946984             | 1.470473  | 0.024131    |
| H                           | -2.747981             | 2.215792  | 1.091711    |
| S                           | -1.817229             | 1.872833  | -1.070937   |
| H                           | -2.339718             | 0.991058  | -1.947819   |
| C                           | 2.575821              | 0.363413  | -0.883113   |
| C                           | 1.451740              | -0.682644 | -0.945424   |
| N                           | 3.834444              | -0.189621 | -1.355164   |
| H                           | 4.133956              | -0.939268 | -0.736628   |
| H                           | 4.562696              | 0.516833  | -1.323432   |

| Nov 11, 22 15:56            | dimers_structures.xyz |           | Page 100/325 |
|-----------------------------|-----------------------|-----------|--------------|
| H                           | 2.277615              | 1.174144  | -1.559535    |
| C                           | 2.673853              | 1.009618  | 0.504987     |
| O                           | 3.689349              | 1.119685  | 1.148037     |
| O                           | 1.480218              | 1.475201  | 0.933334     |
| H                           | 1.603119              | 1.900620  | 1.797679     |
| H                           | 0.481136              | -0.220322 | -0.781799    |
| H                           | 1.453791              | -1.127478 | -1.940057    |
| S                           | 1.654835              | -2.099969 | 0.218050     |
| H                           | 1.267727              | -1.449349 | 1.334340     |
| 28                          |                       |           |              |
| Dimer 229 of the n...n type |                       |           |              |
| C                           | 2.117310              | 0.791577  | -0.454287    |
| C                           | 1.827947              | -0.557108 | -1.126170    |
| N                           | 3.467663              | 1.329771  | -0.635071    |
| H                           | 4.147618              | 0.580082  | -0.737070    |
| H                           | 3.530107              | 1.930378  | -1.448182    |
| H                           | 1.401640              | 1.513413  | -0.865032    |
| C                           | 1.799339              | 0.752038  | 1.052958     |
| O                           | 0.826906              | 0.196019  | 1.521169     |
| O                           | 2.668501              | 1.419624  | 1.802433     |
| H                           | 3.350850              | 1.742573  | 1.154533     |
| H                           | 0.805682              | -0.869530 | -0.925614    |
| H                           | 1.956986              | -0.455921 | -2.203863    |
| S                           | 2.974549              | -1.913321 | -0.630766    |
| H                           | 2.527846              | -2.050349 | 0.634378     |
| C                           | -3.067177             | -0.672992 | -0.520465    |
| C                           | -2.256712             | 0.275840  | -1.425275    |
| N                           | -4.377298             | -0.123011 | -0.217122    |
| H                           | -4.274558             | 0.727521  | 0.330219     |
| H                           | -4.907833             | -0.772629 | 0.354750     |
| H                           | -3.197427             | -1.601734 | -1.086865    |
| C                           | -2.232210             | -1.023110 | 0.715728     |
| O                           | -2.514171             | -0.721872 | 1.851708     |
| O                           | -1.107225             | -1.679034 | 0.378826     |
| H                           | -0.507406             | -1.683186 | 1.143862     |
| H                           | -1.347783             | -0.211310 | -1.771529    |
| H                           | -2.865543             | 0.536569  | -2.290583    |
| S                           | -1.812366             | 1.891550  | -0.650249    |
| H                           | -0.970740             | 1.399748  | 0.284565     |
| 28                          |                       |           |              |
| Dimer 230 of the n...n type |                       |           |              |
| C                           | 2.121214              | -0.791983 | 0.455799     |
| C                           | 1.827181              | 0.557085  | 1.125161     |
| N                           | 3.474771              | -1.322791 | 0.634182     |
| H                           | 4.150571              | -0.569578 | 0.737585     |
| H                           | 3.541367              | -1.925393 | 1.445470     |
| H                           | 1.409855              | -1.516080 | 0.869913     |
| C                           | 1.798881              | -0.756210 | -1.050654    |
| O                           | 0.819282              | -0.210416 | -1.515798    |
| O                           | 2.673377              | -1.414120 | -1.802622    |
| H                           | 3.359508              | -1.731793 | -1.156109    |
| H                           | 0.804181              | 0.865981  | 0.922899     |
| H                           | 1.955822              | 0.458539  | 2.203143     |
| S                           | 2.969505              | 1.916162  | 0.627808     |
| H                           | 2.523210              | 2.049372  | -0.637926    |
| C                           | -3.066715             | 0.670088  | 0.522354     |
| C                           | -2.253528             | -0.278756 | 1.424584     |
| N                           | -4.376094             | 0.118076  | 0.219396     |
| H                           | -4.272239             | -0.731087 | -0.329844    |
| H                           | -4.908642             | 0.767890  | -0.350376    |
| H                           | -3.198325             | 1.597479  | 1.090671     |
| C                           | -2.234585             | 1.025148  | -0.714415    |
| O                           | -2.518682             | 0.727766  | -1.850845    |
| O                           | -1.110196             | 1.682374  | -0.377884    |
| H                           | -0.515307             | 1.696340  | -1.146489    |
| H                           | -1.344419             | 0.209024  | 1.769513     |
| H                           | -2.860290             | -0.540652 | 2.290983     |
| S                           | -1.809185             | -1.893293 | 0.647269     |
| H                           | -0.966061             | -1.399998 | -0.285490    |

| Nov 11, 22 15:56            | dimers_structures.xyz | Page 101/325 |
|-----------------------------|-----------------------|--------------|
| 28                          |                       |              |
| Dimer 231 of the n...n type |                       |              |
| C 2.121594                  | -0.093703             | 0.285256     |
| C 3.361691                  | -0.795482             | 0.851558     |
| N 1.506369                  | -0.708256             | -0.892386    |
| H 2.201791                  | -1.177368             | -1.467188    |
| H 0.796919                  | -1.381297             | -0.622638    |
| H 1.370201                  | -0.081609             | 1.083377     |
| C 2.399246                  | 1.391986              | -0.011999    |
| O 3.080723                  | 2.104200              | 0.691252     |
| O 1.790003                  | 1.839385              | -1.110081    |
| H 1.348336                  | 1.034176              | -1.488343    |
| H 3.725469                  | -0.265566             | 1.730154     |
| H 3.098366                  | -1.812647             | 1.142175     |
| S 4.743994                  | -0.980107             | -0.355322    |
| H 5.076323                  | 0.325808              | -0.414462    |
| C -3.188875                 | 0.845104              | 0.201065     |
| C -1.716710                 | 0.407720              | 0.275040     |
| N -3.759760                 | 1.007441              | 1.526704     |
| H -3.789430                 | 0.109860              | 2.003198     |
| H -4.719085                 | 1.332099              | 1.460074     |
| H -3.190563                 | 1.820342              | -0.300208    |
| C -3.992819                 | -0.089231             | -0.713005    |
| O -4.998765                 | -0.676900             | -0.393429    |
| O -3.443473                 | -0.175695             | -1.940257    |
| H -3.984650                 | -0.767664             | -2.487078    |
| H -1.262891                 | 0.402816              | -0.713693    |
| H -1.178772                 | 1.115759              | 0.904956     |
| S -1.439359                 | -1.237627             | 1.065600     |
| H -1.925086                 | -1.991555             | 0.057651     |
| 28                          |                       |              |
| Dimer 232 of the n...n type |                       |              |
| C -1.958483                 | -0.491085             | -0.243579    |
| C -1.599594                 | 0.998569              | -0.196513    |
| N -2.592136                 | -0.968861             | -1.474967    |
| H -3.168071                 | -0.241522             | -1.892245    |
| H -1.905048                 | -1.260295             | -2.159965    |
| H -1.023927                 | -1.045767             | -0.113842    |
| C -2.827490                 | -0.901996             | 0.958851     |
| O -2.676047                 | -0.467473             | 2.078814     |
| O -3.751942                 | -1.816280             | 0.663535     |
| H -3.662494                 | -1.948145             | -0.316011    |
| H -1.138991                 | 1.242248              | 0.759355     |
| H -0.889837                 | 1.217975              | -0.993223    |
| S -3.023946                 | 2.133713              | -0.479493    |
| H -3.652949                 | 1.893228              | 0.689160     |
| C 2.205157                  | -0.714761             | 0.637827     |
| C 2.194756                  | 0.806874              | 0.873679     |
| N 3.288054                  | -1.353226             | 1.364000     |
| H 4.182464                  | -1.034149             | 1.000958     |
| H 3.260714                  | -2.358824             | 1.228741     |
| H 1.253593                  | -1.090408             | 1.031908     |
| C 2.193159                  | -1.024863             | -0.863536    |
| O 3.048920                  | -1.635109             | -1.457277    |
| O 1.090667                  | -0.525069             | -1.460995    |
| H 1.124277                  | -0.729838             | -2.409387    |
| H 1.322800                  | 1.263294              | 0.411361     |
| H 2.155732                  | 0.987657              | 1.947443     |
| S 3.705459                  | 1.692505              | 0.293591     |
| H 3.428304                  | 1.654677              | -1.026047    |
| 28                          |                       |              |
| Dimer 233 of the n...n type |                       |              |
| C -2.735159                 | 0.899121              | -0.147108    |
| C -3.256491                 | -0.370757             | -0.831637    |
| N -1.738380                 | 1.680172              | -0.884012    |
| H -1.120896                 | 1.068101              | -1.413430    |
| H -2.173500                 | 2.328110              | -1.530063    |
| H -3.601545                 | 1.546080              | 0.033726     |
| C -2.183941                 | 0.595961              | 1.258716     |

| Nov 11, 22 15:56            | dimers_structures.xyz | Page 102/325 |
|-----------------------------|-----------------------|--------------|
| O -2.647311                 | -0.235230             | 2.004524     |
| O -1.144829                 | 1.363982              | 1.601030     |
| H -0.972942                 | 1.916435              | 0.795419     |
| H -3.975511                 | -0.873881             | -0.187327    |
| H -3.753658                 | -0.100047             | -1.763269    |
| S -1.942240                 | -1.565288             | -1.322583    |
| H -1.543202                 | -1.900170             | -0.076996    |
| C 2.898672                  | -0.284019             | -0.697330    |
| C 1.787111                  | -1.325047             | -0.469728    |
| N 4.086740                  | -0.595245             | 0.077128     |
| H 3.878111                  | -0.536322             | 1.070168     |
| H 4.819031                  | 0.082292              | -0.109829    |
| H 3.150978                  | -0.339727             | -1.762170    |
| C 2.355159                  | 1.130496              | -0.467730    |
| O 2.720019                  | 1.886761              | 0.400861     |
| O 1.396883                  | 1.443431              | -1.364284    |
| H 1.071926                  | 2.339216              | -1.177747    |
| H 0.928777                  | -1.113508             | -1.104927    |
| H 2.178640                  | -2.309055             | -0.726933    |
| S 1.211862                  | -1.493335             | 1.274138     |
| H 0.571125                  | -0.310130             | 1.368533     |
| 28                          |                       |              |
| Dimer 234 of the n...n type |                       |              |
| C 2.911396                  | 0.255981              | -0.694796    |
| C 2.064831                  | -0.992273             | -0.971618    |
| N 4.318485                  | 0.029989              | -0.354433    |
| H 4.432216                  | -0.842868             | 0.155717     |
| H 4.904091                  | -0.007819             | -1.180153    |
| H 2.876995                  | 0.874996              | -1.598771    |
| C 2.274963                  | 1.136287              | 0.397503     |
| O 1.079733                  | 1.293574              | 0.521170     |
| O 3.161745                  | 1.737195              | 1.186307     |
| H 4.038940                  | 1.384501              | 0.882260     |
| H 1.054043                  | -0.707028             | -1.256225    |
| H 2.509286                  | -1.551855             | -1.794958    |
| S 1.996956                  | -2.187672             | 0.431327     |
| H 1.346461                  | -1.385978             | 1.299317     |
| C -1.660105                 | -0.138386             | 0.378618     |
| C -2.822120                 | -1.136174             | 0.221242     |
| N -1.713684                 | 0.556570              | 1.651354     |
| H -2.532024                 | 1.158457              | 1.681513     |
| H -0.897057                 | 1.154376              | 1.736062     |
| H -0.745746                 | -0.735786             | 0.349356     |
| C -1.601009                 | 0.792633              | -0.834243    |
| O -1.916442                 | 1.958647              | -0.839412    |
| O -1.176183                 | 0.137733              | -1.935648    |
| H -1.178061                 | 0.752166              | -2.687055    |
| H -2.717464                 | -1.702977             | -0.702532    |
| H -2.791673                 | -1.830224             | 1.061147     |
| S -4.512034                 | -0.398646             | 0.285206     |
| H -4.490912                 | 0.189607              | -0.928239    |
| 28                          |                       |              |
| Dimer 235 of the n...n type |                       |              |
| C 2.726247                  | -0.499352             | -0.877105    |
| C 3.082936                  | 0.967505              | -0.607156    |
| N 1.477612                  | -0.744380             | -1.603735    |
| H 0.777823                  | -0.031284             | -1.410792    |
| H 1.625790                  | -0.774272             | -2.605323    |
| H 3.548131                  | -0.924632             | -1.464840    |
| C 2.717115                  | -1.328199             | 0.421900     |
| O 3.501765                  | -1.167612             | 1.329913     |
| O 1.776376                  | -2.272517             | 0.443990     |
| H 1.276592                  | -2.135554             | -0.403516    |
| H 4.060068                  | 1.037282              | -0.132422    |
| H 3.117949                  | 1.507448              | -1.553458    |
| S 1.855853                  | 1.875881              | 0.428959     |
| H 2.169172                  | 1.279761              | 1.597149     |
| C -1.615971                 | 0.152171              | 0.772762     |
| C -1.966509                 | -1.213872             | 0.164883     |

Nov 11, 22 15:56

dimers\_structures.xyz

Page 103/325

|                             |           |           |           |
|-----------------------------|-----------|-----------|-----------|
| N                           | -2.339866 | 0.384050  | 2.011284  |
| H                           | -3.338281 | 0.429601  | 1.823727  |
| H                           | -2.078769 | 1.281713  | 2.406677  |
| H                           | -0.543844 | 0.125602  | 1.002854  |
| C                           | -1.764428 | 1.285597  | -0.249502 |
| O                           | -2.316373 | 2.338905  | -0.043638 |
| O                           | -1.176215 | 0.981879  | -1.427579 |
| H                           | -1.257612 | 1.741024  | -2.027279 |
| H                           | -1.321506 | -1.441450 | -0.680751 |
| H                           | -1.822876 | -1.977972 | 0.928202  |
| S                           | -3.724991 | -1.387785 | -0.368157 |
| H                           | -3.631432 | -0.632827 | -1.482092 |
| 28                          |           |           |           |
| Dimer 236 of the n...n type |           |           |           |
| C                           | -2.500099 | 1.124055  | -0.416553 |
| C                           | -3.526143 | -0.013785 | -0.507462 |
| N                           | -1.495981 | 1.185868  | -1.476101 |
| H                           | -1.220004 | 0.251877  | -1.768280 |
| H                           | -1.842661 | 1.678424  | -2.290673 |
| H                           | -3.065997 | 2.063254  | -0.438438 |
| C                           | -1.799537 | 1.145817  | 0.953974  |
| O                           | -2.347329 | 0.843461  | 1.990942  |
| O                           | -0.538788 | 1.576243  | 0.922039  |
| H                           | -0.290877 | 1.678707  | -0.029283 |
| H                           | -4.232731 | 0.046985  | 0.318490  |
| H                           | -4.076816 | 0.074433  | -1.444177 |
| S                           | -2.787997 | -1.702808 | -0.542719 |
| H                           | -2.342919 | -1.706199 | 0.730167  |
| C                           | 3.032332  | 0.028196  | 0.552796  |
| C                           | 2.714150  | -1.477426 | 0.493537  |
| N                           | 2.446001  | 0.651764  | 1.725464  |
| H                           | 1.433748  | 0.687592  | 1.633071  |
| H                           | 2.760351  | 1.613796  | 1.802961  |
| H                           | 4.123581  | 0.102098  | 0.625113  |
| C                           | 2.658379  | 0.710967  | -0.768744 |
| O                           | 1.855835  | 1.607744  | -0.888962 |
| O                           | 3.340313  | 0.191633  | -1.807217 |
| H                           | 3.069357  | 0.646609  | -2.620937 |
| H                           | 3.225400  | -1.946122 | -0.345228 |
| H                           | 3.064002  | -1.937333 | 1.417507  |
| S                           | 0.918550  | -1.889757 | 0.414046  |
| H                           | 0.701842  | -1.496102 | -0.856752 |
| 28                          |           |           |           |
| Dimer 237 of the n...n type |           |           |           |
| C                           | -2.130588 | -0.448750 | 0.429986  |
| C                           | -1.643695 | 1.005897  | 0.393047  |
| N                           | -1.722516 | -1.305288 | -0.685309 |
| H                           | -1.638375 | -0.768090 | -1.544913 |
| H                           | -0.836116 | -1.765776 | -0.501155 |
| H                           | -1.742653 | -0.892219 | 1.354533  |
| C                           | -3.663036 | -0.524395 | 0.579929  |
| O                           | -4.311627 | 0.230672  | 1.269550  |
| O                           | -4.215533 | -1.528033 | -0.100860 |
| H                           | -3.453353 | -1.937023 | -0.590244 |
| H                           | -2.026213 | 1.550161  | 1.254831  |
| H                           | -0.555228 | 1.032255  | 0.423654  |
| S                           | -2.095160 | 1.918206  | -1.144196 |
| H                           | -3.420072 | 1.996373  | -0.903031 |
| C                           | 3.230822  | 0.205652  | -0.704225 |
| C                           | 2.027473  | -0.702878 | -1.002782 |
| N                           | 4.472600  | -0.546325 | -0.679216 |
| H                           | 4.456940  | -1.218067 | 0.083623  |
| H                           | 5.257067  | 0.073694  | -0.504840 |
| H                           | 3.277165  | 0.926601  | -1.529269 |
| C                           | 2.984291  | 1.044382  | 0.557334  |
| O                           | 3.714695  | 1.085588  | 1.518000  |
| O                           | 1.841530  | 1.755596  | 0.466723  |
| H                           | 1.735324  | 2.284045  | 1.274292  |
| H                           | 1.124752  | -0.109824 | -1.132861 |

Nov 11, 22 15:56

dimers\_structures.xyz

Page 104/325

|                             |           |           |           |
|-----------------------------|-----------|-----------|-----------|
| H                           | 2.221579  | -1.247230 | -1.926481 |
| S                           | 1.715267  | -2.017469 | 0.254988  |
| H                           | 1.362770  | -1.205432 | 1.273827  |
| 28                          |           |           |           |
| Dimer 238 of the n...n type |           |           |           |
| C                           | 2.956582  | -0.829349 | 0.183608  |
| C                           | 1.551104  | -0.354996 | -0.203915 |
| N                           | 3.261443  | -0.855280 | 1.616756  |
| H                           | 2.778856  | -0.104203 | 2.104544  |
| H                           | 2.991080  | -1.733829 | 2.042588  |
| H                           | 3.069651  | -1.848634 | -0.202909 |
| C                           | 4.047137  | -0.019011 | -0.543162 |
| O                           | 3.949453  | 0.365852  | -1.686836 |
| O                           | 5.135602  | 0.197239  | 0.195580  |
| H                           | 4.914030  | -0.191541 | 1.081033  |
| H                           | 1.429629  | -0.387615 | -1.285667 |
| H                           | 0.805997  | -1.004853 | 0.254742  |
| S                           | 1.137217  | 1.340578  | 0.387814  |
| H                           | 1.913401  | 2.011139  | -0.487516 |
| C                           | -3.668164 | -0.762121 | -0.197376 |
| C                           | -3.753888 | 0.680303  | -0.730423 |
| N                           | -4.203370 | -0.862295 | 1.148591  |
| H                           | -3.636311 | -0.311157 | 1.787371  |
| H                           | -4.163226 | -1.822525 | 1.474913  |
| H                           | -4.289074 | -1.369399 | -0.866059 |
| C                           | -2.244281 | -1.309594 | -0.345499 |
| O                           | -1.538720 | -1.676607 | 0.564991  |
| O                           | -1.860634 | -1.342559 | -1.636775 |
| H                           | -0.964551 | -1.710566 | -1.693066 |
| H                           | -3.411603 | 0.728403  | -1.762303 |
| H                           | -4.795707 | 0.997894  | -0.692647 |
| S                           | -2.842172 | 1.934987  | 0.268031  |
| H                           | -1.585942 | 1.578064  | -0.081047 |
| 28                          |           |           |           |
| Dimer 239 of the n...n type |           |           |           |
| C                           | -2.787558 | -0.277740 | 0.863280  |
| C                           | -1.444668 | 0.366063  | 0.499540  |
| N                           | -2.907183 | -1.715980 | 0.610178  |
| H                           | -2.375725 | -1.987424 | -0.213638 |
| H                           | -2.576425 | -2.264925 | 1.394657  |
| H                           | -2.943230 | -0.111019 | 1.935294  |
| C                           | -3.965721 | 0.447656  | 0.185104  |
| O                           | -4.014411 | 1.646373  | 0.023806  |
| O                           | -4.953902 | -0.366724 | -0.185387 |
| H                           | -4.620724 | -1.275193 | 0.032628  |
| H                           | -1.445961 | 1.424755  | 0.752399  |
| H                           | -0.648481 | -0.128479 | 1.055047  |
| S                           | -0.972048 | 0.173709  | -1.272418 |
| H                           | -1.872388 | 1.041673  | -1.777031 |
| C                           | 3.313867  | -0.495982 | 0.742196  |
| C                           | 2.608462  | 0.798553  | 1.187573  |
| N                           | 4.652214  | -0.221644 | 0.248905  |
| H                           | 4.600434  | 0.335995  | -0.599481 |
| H                           | 5.122212  | -1.086706 | 0.001801  |
| H                           | 3.394304  | -1.120745 | 1.638936  |
| C                           | 2.440843  | -1.286369 | -0.238786 |
| O                           | 2.724735  | -1.528952 | -1.387144 |
| O                           | 1.293872  | -1.701193 | 0.340602  |
| H                           | 0.784847  | -2.215313 | -0.307128 |
| H                           | 1.639118  | 0.577257  | 1.630221  |
| H                           | 3.229374  | 1.280613  | 1.942180  |
| S                           | 2.394447  | 2.069387  | -0.133996 |
| H                           | 1.345323  | 1.494232  | -0.765292 |
| 28                          |           |           |           |
| Dimer 240 of the n...n type |           |           |           |
| C                           | 1.988567  | 0.298764  | -0.577298 |
| C                           | 1.554251  | -0.755194 | 0.447895  |
| N                           | 2.333694  | -0.197614 | -1.912685 |
| H                           | 2.743973  | -1.126965 | -1.858303 |

| Nov 11, 22 15:56 dimers_structures.xyz Page 105/325 |           |           |           |
|-----------------------------------------------------|-----------|-----------|-----------|
| H                                                   | 1.522340  | -0.246216 | -2.517150 |
| H                                                   | 1.153098  | 1.000725  | -0.681060 |
| C                                                   | 3.149996  | 1.161033  | -0.050815 |
| O                                                   | 3.252694  | 1.523903  | 1.099846  |
| O                                                   | 4.028179  | 1.508512  | -0.992501 |
| H                                                   | 3.709151  | 1.041789  | -1.808372 |
| H                                                   | 1.322519  | -0.277881 | 1.398867  |
| H                                                   | 0.659954  | -1.256900 | 0.078925  |
| S                                                   | 2.792392  | -2.088923 | 0.736542  |
| H                                                   | 3.702813  | -1.329725 | 1.380160  |
| C                                                   | -2.690515 | -0.892054 | 0.039225  |
| C                                                   | -2.108042 | -0.194625 | 1.282810  |
| N                                                   | -1.662699 | -1.148557 | -0.955196 |
| H                                                   | -1.368580 | -0.271898 | -1.377284 |
| H                                                   | -2.034290 | -1.720008 | -1.707166 |
| H                                                   | -3.085466 | -1.852553 | 0.388267  |
| C                                                   | -3.893507 | -0.110372 | -0.501846 |
| O                                                   | -3.967205 | 0.373805  | -1.606504 |
| O                                                   | -4.876787 | -0.018025 | 0.414176  |
| H                                                   | -5.612292 | 0.491034  | 0.037027  |
| H                                                   | -2.871454 | -0.068627 | 2.047885  |
| H                                                   | -1.311277 | -0.818578 | 1.685799  |
| S                                                   | -1.310404 | 1.436816  | 0.957538  |
| H                                                   | -2.438797 | 2.143849  | 0.742315  |
| 28                                                  |           |           |           |
| Dimer 241 of the n...n type                         |           |           |           |
| C                                                   | 2.026593  | -0.465616 | 0.004977  |
| C                                                   | 2.091813  | 1.063234  | -0.103519 |
| N                                                   | 1.920947  | -1.017712 | 1.357681  |
| H                                                   | 2.402265  | -0.425619 | 2.030205  |
| H                                                   | 0.957169  | -1.116717 | 1.653203  |
| H                                                   | 1.150106  | -0.795074 | -0.564134 |
| C                                                   | 3.217165  | -1.130640 | -0.714092 |
| O                                                   | 3.681756  | -0.728946 | -1.757233 |
| O                                                   | 3.675018  | -2.218195 | -0.095049 |
| H                                                   | 3.134317  | -2.273984 | 0.735544  |
| H                                                   | 2.148839  | 1.364831  | -1.147967 |
| H                                                   | 1.192982  | 1.497034  | 0.333807  |
| S                                                   | 3.490121  | 1.827444  | 0.823086  |
| H                                                   | 4.474449  | 1.386679  | 0.013311  |
| C                                                   | -2.384182 | -0.757708 | -0.367763 |
| C                                                   | -1.674193 | 0.606842  | -0.342410 |
| N                                                   | -2.855586 | -1.081225 | -1.702725 |
| H                                                   | -3.573497 | -0.418750 | -1.984750 |
| H                                                   | -3.289265 | -1.998882 | -1.710625 |
| H                                                   | -1.633219 | -1.501089 | -0.074822 |
| C                                                   | -3.471760 | -0.826997 | 0.711369  |
| O                                                   | -4.634490 | -1.085380 | 0.510482  |
| O                                                   | -2.970873 | -0.569830 | 1.935623  |
| H                                                   | -3.687173 | -0.628463 | 2.588097  |
| H                                                   | -1.224905 | 0.787744  | 0.631559  |
| H                                                   | -0.893543 | 0.602331  | -1.102511 |
| S                                                   | -2.742723 | 2.046705  | -0.776642 |
| H                                                   | -3.418331 | 2.110254  | 0.389333  |
| 28                                                  |           |           |           |
| Dimer 242 of the n...n type                         |           |           |           |
| C                                                   | 1.855129  | 0.421952  | -0.185972 |
| C                                                   | 2.047675  | -1.077780 | 0.068452  |
| N                                                   | 1.882209  | 0.852287  | -1.586881 |
| H                                                   | 2.509629  | 0.268850  | -2.135292 |
| H                                                   | 0.963122  | 0.813027  | -2.011024 |
| O                                                   | 0.880670  | 0.688929  | 0.235119  |
| C                                                   | 2.864147  | 1.264103  | 0.614688  |
| O                                                   | 3.217293  | 0.999906  | 1.742530  |
| O                                                   | 3.295390  | 2.345030  | -0.036153 |
| H                                                   | 2.870810  | 2.277729  | -0.930806 |
| H                                                   | 1.989646  | -1.289729 | 1.134509  |
| H                                                   | 1.259621  | -1.634563 | -0.438543 |
| S                                                   | 3.624763  | -1.761765 | -0.599675 |

| Nov 11, 22 15:56 dimers_structures.xyz Page 106/325 |           |           |           |
|-----------------------------------------------------|-----------|-----------|-----------|
| H                                                   | 4.445214  | -1.154736 | 0.282073  |
| C                                                   | -2.324823 | -0.712550 | -0.588409 |
| C                                                   | -2.552721 | 0.775615  | -0.904013 |
| N                                                   | -3.386516 | -1.538898 | -1.135662 |
| H                                                   | -4.268234 | -1.312620 | -0.682737 |
| H                                                   | -3.204957 | -2.518761 | -0.942854 |
| H                                                   | -1.385425 | -0.989283 | -1.081636 |
| C                                                   | -2.082353 | -0.926798 | 0.911410  |
| O                                                   | -2.695179 | -1.695436 | 1.612395  |
| O                                                   | -1.077242 | -0.151465 | 1.368090  |
| H                                                   | -0.944924 | -0.326890 | 2.313692  |
| H                                                   | -1.699820 | 1.373911  | -0.591396 |
| H                                                   | -2.681425 | 0.884411  | -1.980466 |
| S                                                   | -4.083118 | 1.493493  | -0.163526 |
| H                                                   | -3.634513 | 1.566835  | 1.106551  |
| 28                                                  |           |           |           |
| Dimer 243 of the n...n type                         |           |           |           |
| C                                                   | 2.505415  | -0.743552 | -0.572211 |
| C                                                   | 1.841498  | 0.573615  | -0.993843 |
| N                                                   | 1.799241  | -1.543333 | 0.431520  |
| H                                                   | 1.312788  | -0.945405 | 1.095070  |
| H                                                   | 1.124556  | -2.170550 | 0.010872  |
| H                                                   | 2.607498  | -1.353984 | -1.476856 |
| C                                                   | 3.954469  | -0.519901 | -0.095477 |
| O                                                   | 4.709201  | 0.287259  | -0.589683 |
| O                                                   | 4.321172  | -1.326845 | 0.900448  |
| H                                                   | 3.499931  | -1.838461 | 1.119177  |
| H                                                   | 2.462527  | 1.086537  | -1.726221 |
| H                                                   | 0.868546  | 0.369527  | -1.439139 |
| S                                                   | 1.478747  | 1.723010  | 0.400371  |
| H                                                   | 2.759109  | 1.979123  | 0.739451  |
| C                                                   | -2.050713 | 0.035485  | 0.794838  |
| C                                                   | -2.119580 | -1.284324 | 0.009596  |
| N                                                   | -2.903799 | -0.001885 | 1.969722  |
| H                                                   | -3.876786 | -0.085515 | 1.686601  |
| H                                                   | -2.826760 | 0.867630  | 2.487604  |
| H                                                   | -1.011494 | 0.144558  | 1.128319  |
| C                                                   | -2.304641 | 1.240558  | -0.119485 |
| O                                                   | -3.106458 | 2.118172  | 0.092976  |
| O                                                   | -1.499954 | 1.220384  | -1.201382 |
| H                                                   | -1.667659 | 2.013425  | -1.735462 |
| H                                                   | -1.390401 | -1.294230 | -0.797322 |
| H                                                   | -1.898376 | -2.104213 | 0.692416  |
| S                                                   | -3.781117 | -1.676910 | -0.690626 |
| H                                                   | -3.744006 | -0.792567 | -1.708501 |
| 28                                                  |           |           |           |
| Dimer 244 of the n...n type                         |           |           |           |
| C                                                   | 2.165182  | 0.615271  | 0.446217  |
| C                                                   | 3.214565  | -0.056460 | 1.340918  |
| N                                                   | 0.997973  | -0.199396 | 0.097138  |
| H                                                   | 1.260382  | -1.177562 | -0.004140 |
| H                                                   | 0.277562  | -0.134909 | 0.807944  |
| H                                                   | 1.807565  | 1.503213  | 0.980142  |
| C                                                   | 2.796708  | 1.173665  | -0.842599 |
| O                                                   | 3.893785  | 1.682493  | -0.887258 |
| O                                                   | 2.008941  | 1.079045  | -1.914916 |
| H                                                   | 1.208043  | 0.595278  | -1.594813 |
| H                                                   | 4.027771  | 0.635285  | 1.553076  |
| H                                                   | 2.750235  | -0.348010 | 2.283068  |
| S                                                   | 3.914108  | -1.613690 | 0.643769  |
| H                                                   | 4.634419  | -1.036301 | -0.339514 |
| C                                                   | -3.591845 | -0.282019 | 0.704338  |
| C                                                   | -2.725874 | -1.457775 | 0.222352  |
| N                                                   | -4.812682 | -0.177231 | -0.076400 |
| H                                                   | -4.585569 | 0.050612  | -1.041028 |
| H                                                   | -5.389974 | 0.581663  | 0.271576  |
| H                                                   | -3.862743 | -0.508237 | 1.742869  |
| C                                                   | -2.791640 | 1.024392  | 0.771666  |
| O                                                   | -3.105353 | 2.059975  | 0.237192  |

| Nov 11, 22 15:56          | dimers_structures.xyz |           | Page 107/325 |
|---------------------------|-----------------------|-----------|--------------|
| O                         | -1.683923             | 0.901398  | 1.537988     |
| H                         | -1.254568             | 1.770661  | 1.596102     |
| H                         | -1.877594             | -1.614502 | 0.885392     |
| H                         | -3.339902             | -2.357653 | 0.232391     |
| S                         | -2.113984             | -1.305625 | -1.513402    |
| H                         | -1.064824             | -0.499851 | -1.245493    |
| 28                        |                       |           |              |
| Dimer 1 of the n...z type |                       |           |              |
| C                         | 1.600758              | -0.103114 | -0.595542    |
| C                         | 2.843504              | 0.616669  | -1.136454    |
| N                         | 0.732437              | 0.720715  | 0.264632     |
| H                         | 1.302274              | 1.202128  | 0.959592     |
| H                         | 0.280869              | 1.443571  | -0.289932    |
| H                         | 0.994117              | -0.403352 | -1.455308    |
| C                         | 1.944066              | -1.399869 | 0.160065     |
| O                         | 3.061886              | -1.674284 | 0.545581     |
| O                         | 0.921158              | -2.217144 | 0.384860     |
| H                         | 0.080257              | -1.944129 | -0.116883    |
| H                         | 3.463641              | -0.082609 | -1.697294    |
| H                         | 2.521420              | 1.409413  | -1.813439    |
| S                         | 3.885983              | 1.470770  | 0.123359     |
| H                         | 4.284607              | 0.351826  | 0.758311     |
| C                         | -2.308106             | -1.069979 | -0.711329    |
| C                         | -2.622546             | -0.575278 | 0.729981     |
| O                         | -1.169474             | -1.587933 | -0.915625    |
| O                         | -3.219428             | -0.919523 | -1.535554    |
| H                         | -3.282511             | -1.317495 | 1.186822     |
| C                         | -3.350444             | 0.766624  | 0.743444     |
| N                         | -1.371385             | -0.527814 | 1.558835     |
| H                         | -1.535158             | -0.080194 | 2.461109     |
| H                         | -3.541709             | 1.096857  | 1.765994     |
| H                         | -4.307138             | 0.632367  | 0.244275     |
| S                         | -2.450882             | 2.152352  | -0.074836    |
| H                         | -1.026501             | -1.469363 | 1.747224     |
| H                         | -0.568505             | -0.008381 | 1.052953     |
| H                         | -2.540170             | 1.647609  | -1.322750    |
| 28                        |                       |           |              |
| Dimer 2 of the n...z type |                       |           |              |
| C                         | -2.554882             | -0.610801 | -1.098294    |
| C                         | -3.794634             | 0.187847  | -0.664892    |
| N                         | -2.721793             | -2.033004 | -0.843408    |
| H                         | -2.811952             | -2.188194 | 0.157745     |
| H                         | -1.887267             | -2.534866 | -1.130692    |
| H                         | -2.452135             | -0.459157 | -2.179609    |
| C                         | -1.288460             | -0.009154 | -0.479904    |
| O                         | -0.478432             | -0.687557 | 0.142112     |
| O                         | -1.169010             | 1.282681  | -0.690701    |
| H                         | -0.291986             | 1.643121  | -0.323375    |
| H                         | -3.721331             | 1.220265  | -0.999975    |
| H                         | -4.678145             | -0.267989 | -1.111094    |
| S                         | -4.104449             | 0.176832  | 1.157167     |
| H                         | -3.095453             | 1.007937  | 1.490157     |
| C                         | 2.201522              | 1.839990  | -0.166989    |
| C                         | 2.690494              | 0.518770  | 0.488995     |
| O                         | 1.044817              | 2.237090  | 0.178464     |
| O                         | 2.988059              | 2.364721  | -0.962155    |
| H                         | 3.660137              | 0.697385  | 0.953271     |
| C                         | 2.795662              | -0.585403 | -0.562972    |
| N                         | 1.736895              | 0.106222  | 1.573772     |
| H                         | 1.583028              | 0.870311  | 2.231290     |
| H                         | 3.461948              | -0.243115 | -1.351694    |
| H                         | 1.814905              | -0.788273 | -0.996869    |
| S                         | 3.379828              | -2.204914 | 0.096704     |
| H                         | 0.817405              | -0.137463 | 1.140902     |
| H                         | 2.086530              | -0.711616 | 2.078333     |
| H                         | 4.620850              | -1.794542 | 0.429722     |
| 28                        |                       |           |              |
| Dimer 3 of the n...z type |                       |           |              |
| C                         | 3.168597              | 0.228119  | 0.624494     |

| Nov 11, 22 15:56          | dimers_structures.xyz |           | Page 108/325 |
|---------------------------|-----------------------|-----------|--------------|
| C                         | 3.273704              | -0.710299 | -0.596082    |
| N                         | 3.341721              | -0.506192 | 1.867433     |
| H                         | 2.568405              | -1.156689 | 1.982643     |
| H                         | 3.296578              | 0.130303  | 2.657286     |
| H                         | 3.977497              | 0.959515  | 0.525216     |
| C                         | 1.851902              | 0.998504  | 0.528939     |
| O                         | 0.932558              | 0.827201  | 1.316142     |
| O                         | 1.804321              | 1.803129  | -0.518388    |
| H                         | 0.854282              | 2.068947  | -0.716992    |
| H                         | 3.279227              | -0.132478 | -1.518353    |
| H                         | 4.207350              | -1.267069 | -0.520782    |
| S                         | 1.940712              | -1.988388 | -0.708522    |
| H                         | 0.982971              | -1.199424 | -1.247562    |
| C                         | -0.990857             | 0.752557  | -1.209172    |
| C                         | -1.810088             | 0.118742  | -0.054764    |
| O                         | -0.731235             | 1.987319  | -1.087164    |
| O                         | -0.650870             | -0.021364 | -2.115833    |
| H                         | -1.292050             | -0.782564 | 0.272861     |
| C                         | -3.228274             | -0.213122 | -0.506154    |
| N                         | -1.806909             | 1.061593  | 1.111607     |
| H                         | -0.819168             | 1.186083  | 1.404867     |
| H                         | -3.166060             | -0.863954 | -1.376245    |
| H                         | -3.761772             | 0.694659  | -0.794969    |
| S                         | -4.266689             | -1.003990 | 0.795951     |
| H                         | -2.159424             | 1.977764  | 0.826447     |
| H                         | -2.371305             | 0.702522  | 1.885867     |
| H                         | -3.552685             | -2.144644 | 0.885942     |
| 28                        |                       |           |              |
| Dimer 4 of the n...z type |                       |           |              |
| C                         | 2.707594              | -1.177571 | -0.466876    |
| C                         | 3.214615              | -0.549798 | 0.843238     |
| N                         | 3.339979              | -0.569390 | -1.627457    |
| H                         | 3.060277              | 0.406339  | -1.689640    |
| H                         | 3.001571              | -1.013740 | -2.475395    |
| H                         | 2.991739              | -2.235068 | -0.426764    |
| C                         | 1.173412              | -1.153974 | -0.502174    |
| O                         | 0.537144              | -0.543748 | -1.344676    |
| O                         | 0.636866              | -1.850463 | 0.484353     |
| H                         | -0.387103             | -1.850388 | 0.470574     |
| H                         | 2.784477              | -1.063662 | 1.700908     |
| H                         | 4.299880              | -0.644317 | 0.882130     |
| S                         | 2.894143              | 1.262671  | 1.003518     |
| H                         | 1.559766              | 1.195888  | 1.174817     |
| C                         | -2.815065             | -1.170167 | 0.385433     |
| C                         | -2.307539             | 0.112649  | -0.322126    |
| O                         | -4.034947             | -1.261303 | 0.596317     |
| O                         | -1.906716             | -1.993847 | 0.690063     |
| H                         | -1.705354             | -0.168005 | -1.183212    |
| C                         | -1.474092             | 0.970300  | 0.627685     |
| N                         | -3.489974             | 0.893779  | -0.828027    |
| H                         | -3.938009             | 0.414142  | -1.610133    |
| H                         | -0.691016             | 0.347159  | 1.052184     |
| H                         | -2.083822             | 1.346735  | 1.451530     |
| S                         | -0.728574             | 2.452674  | -0.172924    |
| H                         | -4.197184             | 0.970169  | -0.090489    |
| H                         | -3.205874             | 1.828875  | -1.138965    |
| H                         | 0.059192              | 1.755891  | -1.018185    |
| 28                        |                       |           |              |
| Dimer 5 of the n...z type |                       |           |              |
| C                         | -2.981810             | -0.479014 | 0.232318     |
| C                         | -3.117462             | 0.712202  | -0.727258    |
| N                         | -3.244647             | -0.075642 | 1.607856     |
| H                         | -2.526620             | 0.581162  | 1.905998     |
| H                         | -3.153150             | -0.878365 | 2.223153     |
| H                         | -3.742474             | -1.210609 | -0.066374    |
| C                         | -1.626530             | -1.174335 | 0.048615     |
| O                         | -0.922088             | -1.493235 | 0.997280     |
| O                         | -1.296738             | -1.360643 | -1.213249    |
| H                         | -0.329555             | -1.702320 | -1.302096    |

| Nov 11, 22 15:56          | dimers_structures.xyz |           | Page 109/325 |
|---------------------------|-----------------------|-----------|--------------|
| H                         | -3.142816             | 0.376499  | -1.761022    |
| H                         | -4.043435             | 1.240115  | -0.502369    |
| S                         | -1.760277             | 1.966950  | -0.569984    |
| H                         | -0.916462             | 1.368502  | -1.432963    |
| C                         | 1.861150              | -1.683766 | -0.424930    |
| C                         | 1.602263              | -0.225920 | 0.059876     |
| O                         | 2.771975              | -2.283417 | 0.166695     |
| O                         | 1.140474              | -2.098011 | -1.377639    |
| H                         | 0.645955              | 0.145952  | -0.291698    |
| C                         | 2.727576              | 0.695854  | -0.397333    |
| N                         | 1.515484              | -0.266424 | 1.557978     |
| H                         | 0.630495              | -0.727644 | 1.812909     |
| H                         | 2.771727              | 0.683336  | -1.485688    |
| H                         | 3.685315              | 0.344782  | -0.010366    |
| S                         | 2.549327              | 2.433274  | 0.196204     |
| H                         | 2.298645              | -0.815149 | 1.927311     |
| H                         | 1.538194              | 0.676732  | 1.958435     |
| H                         | 1.423416              | 2.720185  | -0.488017    |
| 28                        |                       |           |              |
| Dimer 6 of the n...z type |                       |           |              |
| C                         | -2.671210             | -1.152976 | -0.641450    |
| C                         | -3.456489             | 0.051104  | -0.082534    |
| N                         | -2.713385             | -2.282084 | 0.273561     |
| H                         | -2.229440             | -2.036957 | 1.133666     |
| H                         | -2.210205             | -3.070249 | -0.121977    |
| H                         | -3.159401             | -1.434933 | -1.580067    |
| C                         | -1.259882             | -0.681298 | -0.990999    |
| O                         | -0.268872             | -1.034555 | -0.370544    |
| O                         | -1.242126             | 0.187534  | -1.987908    |
| H                         | -0.355642             | 0.660970  | -2.030696    |
| H                         | -3.520424             | 0.838273  | -0.831844    |
| H                         | -4.463264             | -0.279249 | 0.172307     |
| S                         | -2.761950             | 0.767514  | 1.474715     |
| H                         | -1.675391             | 1.358683  | 0.921311     |
| C                         | 0.987947              | 1.582094  | -0.447403    |
| C                         | 2.103390              | 0.812110  | 0.321981     |
| O                         | 0.148486              | 2.159713  | 0.271928     |
| O                         | 1.015456              | 1.514725  | -1.704363    |
| H                         | 2.810039              | 1.539649  | 0.725706     |
| C                         | 2.823050              | -0.228306 | -0.522748    |
| N                         | 1.430917              | 0.166449  | 1.506162     |
| H                         | 2.104552              | -0.322428 | 2.101049     |
| H                         | 3.282561              | 0.274205  | -1.369958    |
| H                         | 2.107554              | -0.954117 | -0.907102    |
| S                         | 4.093460              | -1.197867 | 0.399623     |
| H                         | 0.936239              | 0.879886  | 2.046863     |
| H                         | 0.727599              | -0.503865 | 1.160592     |
| H                         | 4.933957              | -0.170474 | 0.638712     |
| 28                        |                       |           |              |
| Dimer 7 of the n...z type |                       |           |              |
| C                         | -2.741365             | -0.827352 | -0.549221    |
| C                         | -2.567618             | 0.694218  | -0.727508    |
| N                         | -3.832617             | -1.144360 | 0.359819     |
| H                         | -3.586364             | -0.865610 | 1.305538     |
| H                         | -3.980040             | -2.148723 | 0.384428     |
| H                         | -2.982047             | -1.223541 | -1.539417    |
| C                         | -1.380433             | -1.404666 | -0.143590    |
| O                         | -1.067937             | -1.601466 | 1.020049     |
| O                         | -0.574140             | -1.579162 | -1.175024    |
| H                         | 0.370939              | -1.863186 | -0.878238    |
| H                         | -1.753448             | 0.892836  | -1.425236    |
| H                         | -3.487765             | 1.112248  | -1.135860    |
| S                         | -2.278570             | 1.645780  | 0.835772     |
| H                         | -1.398481             | 0.794618  | 1.402094     |
| C                         | 2.542283              | -1.359951 | 0.061153     |
| C                         | 1.875365              | 0.016647  | 0.355318     |
| O                         | 3.724813              | -1.495357 | 0.414559     |
| O                         | 1.813314              | -2.187379 | -0.552882    |
| H                         | 0.896514              | -0.134827 | 0.804567     |

| Nov 11, 22 15:56          | dimers_structures.xyz |           | Page 110/325 |
|---------------------------|-----------------------|-----------|--------------|
| C                         | 1.766337              | 0.819200  | -0.946040    |
| N                         | 2.727023              | 0.744140  | 1.356767     |
| H                         | 2.508193              | 0.461338  | 2.312695     |
| H                         | 1.091536              | 0.292143  | -1.616685    |
| H                         | 2.742766              | 0.890958  | -1.429312    |
| S                         | 1.209468              | 2.562256  | -0.735305    |
| H                         | 3.707827              | 0.486799  | 1.181901     |
| H                         | 2.596007              | 1.760300  | 1.281434     |
| H                         | -0.016656             | 2.295931  | -0.225776    |
| 28                        |                       |           |              |
| Dimer 8 of the n...z type |                       |           |              |
| C                         | -3.070508             | 0.797186  | 0.082632     |
| C                         | -3.311162             | -0.462840 | 0.930530     |
| N                         | -3.354679             | 0.672486  | -1.349604    |
| H                         | -3.323230             | -0.301212 | -1.641759    |
| H                         | -4.257970             | 1.057433  | -1.595198    |
| H                         | -3.688770             | 1.596711  | 0.503232     |
| C                         | -1.628035             | 1.295436  | 0.248118     |
| O                         | -1.079719             | 1.418459  | 1.329103     |
| O                         | -1.023281             | 1.601540  | -0.886954    |
| H                         | -1.709524             | 1.399084  | -1.584335    |
| H                         | -2.960374             | -0.288275 | 1.946965     |
| H                         | -4.380531             | -0.672006 | 0.960601     |
| S                         | -2.532665             | -1.993775 | 0.257362     |
| H                         | -1.225438             | -1.609593 | 0.368385     |
| C                         | 1.133683              | -0.590304 | -0.559302    |
| C                         | 1.908255              | 0.743234  | -0.355287    |
| O                         | 0.604770              | -1.079442 | 0.472017     |
| O                         | 1.145335              | -1.032187 | -1.722940    |
| H                         | 1.471481              | 1.493830  | -1.013104    |
| C                         | 3.393692              | 0.597153  | -0.671052    |
| N                         | 1.695548              | 1.225711  | 1.051980     |
| H                         | 2.195279              | 2.095672  | 1.239900     |
| H                         | 3.919040              | 1.545311  | -0.542214    |
| H                         | 3.487359              | 0.288112  | -1.710299    |
| S                         | 4.285123              | -0.606932 | 0.408248     |
| H                         | 0.677217              | 1.368062  | 1.229066     |
| H                         | 2.018856              | 0.510052  | 1.707853     |
| H                         | 3.629567              | -1.705965 | -0.018120    |
| 28                        |                       |           |              |
| Dimer 9 of the n...z type |                       |           |              |
| C                         | -2.070052             | -0.289384 | 0.757014     |
| C                         | -1.914694             | 0.994910  | -0.083829    |
| N                         | -1.120439             | -1.326597 | 0.350643     |
| H                         | -1.501089             | -1.839806 | -0.442241    |
| H                         | -0.999192             | -2.003345 | 1.098588     |
| H                         | -1.866951             | -0.009601 | 1.793615     |
| C                         | -3.517737             | -0.770945 | 0.684252     |
| O                         | -3.884052             | -1.750633 | 0.077921     |
| O                         | -4.344133             | 0.060118  | 1.338745     |
| H                         | -5.259138             | -0.245409 | 1.228918     |
| H                         | -2.677074             | 1.718925  | 0.200705     |
| H                         | -0.934606             | 1.434013  | 0.097539     |
| S                         | -1.952227             | 0.734138  | -1.905981    |
| H                         | -3.201269             | 0.229615  | -1.988560    |
| C                         | 1.804750              | 1.663761  | 0.545382     |
| C                         | 2.155245              | 0.150110  | 0.374524     |
| O                         | 1.155498              | 2.181798  | -0.398507    |
| O                         | 2.238018              | 2.189524  | 1.588227     |
| H                         | 1.918831              | -0.380623 | 1.296458     |
| C                         | 3.642350              | 0.012441  | 0.052640     |
| N                         | 1.303415              | -0.422866 | -0.711357    |
| H                         | 0.371381              | -0.756123 | -0.313615    |
| H                         | 4.212889              | 0.472215  | 0.856972     |
| H                         | 3.881123              | 0.530342  | -0.878956    |
| S                         | 4.207622              | -1.725653 | -0.202178    |
| H                         | 1.111951              | 0.330162  | -1.383152    |
| H                         | 1.754834              | -1.214350 | -1.176091    |
| H                         | 3.899346              | -2.167342 | 1.034385     |



| Nov 11, 22 15:56           | dimers_structures.xyz         | Page 111/325 |
|----------------------------|-------------------------------|--------------|
| 28                         |                               |              |
| Dimer 10 of the n...z type |                               |              |
| C                          | 1.999786 0.200509 0.834391    |              |
| C                          | 1.573528 -1.217931 0.408841   |              |
| N                          | 0.916560 1.166744 0.652719    |              |
| H                          | 0.821762 1.384218 -0.337196   |              |
| H                          | 1.150095 2.044314 1.109790    |              |
| H                          | 2.245896 0.147722 1.898517    |              |
| C                          | 3.271920 0.606226 0.091603    |              |
| O                          | 3.325383 1.466389 -0.755435   |              |
| O                          | 4.320191 -0.142110 0.471520   |              |
| H                          | 5.100985 0.113793 -0.045665   |              |
| H                          | 2.399441 -1.911762 0.558515   |              |
| H                          | 0.727192 -1.544266 1.012246   |              |
| S                          | 0.958858 -1.353299 -1.322659  |              |
| H                          | 2.101679 -0.985605 -1.939758  |              |
| C                          | -2.228887 -1.651996 0.173784  |              |
| C                          | -2.453834 -0.133606 0.480800  |              |
| O                          | -1.492380 -2.269447 0.984214  |              |
| O                          | -2.823919 -2.080224 -0.833403 |              |
| H                          | -3.485184 -0.018161 0.818260  |              |
| C                          | -2.207876 0.730863 -0.751294  |              |
| N                          | -1.563995 0.266117 1.621431   |              |
| H                          | -1.412819 -0.575230 2.189442  |              |
| H                          | -2.929421 0.452421 -1.515155  |              |
| H                          | -1.212194 0.545262 -1.153903  |              |
| S                          | -2.281949 2.547230 -0.441724  |              |
| H                          | -0.611863 0.599702 1.276178   |              |
| H                          | -1.968164 1.012215 2.184504   |              |
| H                          | -3.587936 2.601203 -0.108623  |              |
| 28                         |                               |              |
| Dimer 11 of the n...z type |                               |              |
| C                          | -2.757754 -0.230289 0.737031  |              |
| C                          | -1.705047 -1.346623 0.691312  |              |
| N                          | -3.890536 -0.370868 -0.182456 |              |
| H                          | -3.641696 -0.948730 -0.981315 |              |
| H                          | -4.699269 -0.778132 0.270036  |              |
| H                          | -3.138982 -0.186829 1.762513  |              |
| C                          | -2.103528 1.145828 0.515725   |              |
| O                          | -1.087346 1.498979 1.076456   |              |
| O                          | -2.769903 1.932730 -0.319336  |              |
| H                          | -3.547141 1.377132 -0.601209  |              |
| H                          | -0.874557 -1.090959 1.348315  |              |
| H                          | -2.152310 -2.279368 1.035143  |              |
| S                          | -1.058768 -1.711561 -0.995737 |              |
| H                          | -0.473066 -0.510530 -1.229398 |              |
| C                          | 1.890646 0.435855 -1.399627   |              |
| C                          | 2.625459 0.969189 -0.126239   |              |
| O                          | 0.818962 1.032215 -1.688369   |              |
| O                          | 2.444483 -0.508740 -1.986603  |              |
| H                          | 3.417748 1.639103 -0.467654   |              |
| C                          | 3.239930 -0.127337 0.734643   |              |
| N                          | 1.649538 1.805093 0.649261    |              |
| H                          | 2.091121 2.525636 1.219305    |              |
| H                          | 3.786247 0.293869 1.579754    |              |
| H                          | 3.932045 -0.691678 0.114156   |              |
| S                          | 1.999187 -1.277178 1.470100   |              |
| H                          | 0.996398 2.219491 -0.030953   |              |
| H                          | 1.059362 1.216856 1.250342    |              |
| H                          | 1.496584 -1.726820 0.299261   |              |
| 28                         |                               |              |
| Dimer 12 of the n...z type |                               |              |
| C                          | 3.099587 -0.843913 0.121617   |              |
| C                          | 3.301138 0.452375 0.921256    |              |
| N                          | 3.510306 -0.807296 -1.285043  |              |
| H                          | 3.457657 0.139790 -1.652461   |              |
| H                          | 4.454400 -1.149499 -1.413105  |              |
| H                          | 3.667702 -1.630357 0.629952   |              |
| C                          | 1.640691 -1.324518 0.198113   |              |

| Nov 11, 22 15:56           | dimers_structures.xyz         | Page 112/325 |
|----------------------------|-------------------------------|--------------|
| O                          | 0.989440 -1.338043 1.220887   |              |
| O                          | 1.156193 -1.762720 -0.960175  |              |
| H                          | 1.904425 -1.622866 -1.602595  |              |
| H                          | 2.881055 0.336760 1.919616    |              |
| H                          | 4.369139 0.651095 1.012226    |              |
| S                          | 2.590966 1.957052 0.125589    |              |
| H                          | 1.273324 1.664401 0.302126    |              |
| C                          | -1.213041 0.776273 -0.453155  |              |
| C                          | -1.798327 -0.617082 -0.063310 |              |
| O                          | -0.651048 1.403546 0.487656   |              |
| O                          | -1.345617 1.105062 -1.642635  |              |
| H                          | -1.129347 -1.365967 -0.485097 |              |
| C                          | -3.209762 -0.852866 -0.583703 |              |
| N                          | -1.708257 -0.738787 1.432712  |              |
| H                          | -1.318384 -1.630552 1.733070  |              |
| H                          | -3.563262 -1.850495 -0.319563 |              |
| H                          | -3.188006 -0.763246 -1.667491 |              |
| S                          | -4.463157 0.314924 0.102498   |              |
| H                          | -1.057824 0.023917 1.702586   |              |
| H                          | -2.611481 -0.568640 1.882057  |              |
| H                          | -3.912151 1.432257 -0.415172  |              |
| 28                         |                               |              |
| Dimer 13 of the n...z type |                               |              |
| C                          | -1.685630 0.351205 0.414489   |              |
| C                          | -1.348187 0.090318 -1.063336  |              |
| N                          | -0.807518 -0.385921 1.324863  |              |
| H                          | -0.800283 -1.372016 1.067283  |              |
| H                          | -1.192793 -0.352975 2.266219  |              |
| H                          | -1.521806 1.422091 0.572510   |              |
| C                          | -3.163200 0.073954 0.691642   |              |
| O                          | -3.574604 -0.698125 1.525503  |              |
| O                          | -3.958703 0.806482 -0.106309  |              |
| H                          | -4.886465 0.608142 0.098547   |              |
| H                          | -2.027701 0.655178 -1.697854  |              |
| H                          | -0.339327 0.433630 -1.276834  |              |
| S                          | -1.373489 -1.683195 -1.565992 |              |
| H                          | -2.693825 -1.890888 -1.381990 |              |
| C                          | 1.465535 1.873156 -0.583167   |              |
| C                          | 2.312429 0.841991 0.234008    |              |
| O                          | 0.632399 2.539993 0.074518    |              |
| O                          | 1.716907 1.910341 -1.805652   |              |
| H                          | 3.324127 1.241835 0.324041    |              |
| C                          | 2.351607 -0.530990 -0.431422  |              |
| N                          | 1.740573 0.730151 1.612848    |              |
| H                          | 1.621616 1.660348 2.014583    |              |
| H                          | 2.706603 -0.410392 -1.451385  |              |
| H                          | 1.355041 -0.972611 -0.468549  |              |
| S                          | 3.381945 -1.778570 0.456904   |              |
| H                          | 0.767840 0.290480 1.545400    |              |
| H                          | 2.330150 0.159462 2.220872    |              |
| H                          | 4.566821 -1.160988 0.270837   |              |
| 28                         |                               |              |
| Dimer 14 of the n...z type |                               |              |
| C                          | -3.047606 -0.948093 -0.331346 |              |
| C                          | -3.515801 0.403663 0.238662   |              |
| N                          | -3.165579 -2.008700 0.659683  |              |
| H                          | -2.533235 -1.811437 1.431627  |              |
| H                          | -2.850353 -2.887388 0.259811  |              |
| H                          | -3.709869 -1.176592 -1.173697 |              |
| C                          | -1.635460 -0.781483 -0.906106 |              |
| O                          | -0.659052 -1.348266 -0.454915 |              |
| O                          | -1.604682 0.084186 -1.913445  |              |
| H                          | -0.647286 0.361705 -2.098265  |              |
| H                          | -3.550980 1.150504 -0.552277  |              |
| H                          | -4.513982 0.283820 0.660021   |              |
| S                          | -2.470491 1.053984 1.618881   |              |
| H                          | -1.375331 1.342310 0.873683   |              |
| C                          | 1.114971 1.194917 -0.909058   |              |
| C                          | 2.480774 0.725205 -0.349139   |              |

| Nov 11, 22 15:56           | dimers_structures.xyz |           |           | Page 113/325 |
|----------------------------|-----------------------|-----------|-----------|--------------|
| O                          | 0.377483              | 1.828325  | -0.127753 |              |
| O                          | 0.873775              | 0.818869  | -2.084952 |              |
| H                          | 3.275586              | 0.909465  | -1.068784 |              |
| C                          | 2.387204              | -0.764437 | -0.013145 |              |
| N                          | 2.785982              | 1.523558  | 0.889325  |              |
| H                          | 3.172429              | 2.440111  | 0.659930  |              |
| H                          | 2.143306              | -1.301955 | -0.925837 |              |
| H                          | 1.578355              | -0.946817 | 0.695049  |              |
| S                          | 3.906849              | -1.458925 | 0.760860  |              |
| H                          | 1.899944              | 1.685397  | 1.386166  |              |
| H                          | 3.454942              | 1.031447  | 1.492072  |              |
| H                          | 4.727247              | -1.249065 | -0.289094 |              |
| 28                         |                       |           |           |              |
| Dimer 15 of the n...z type |                       |           |           |              |
| C                          | 3.088838              | 0.481130  | -0.535630 |              |
| C                          | 3.533741              | -0.912618 | -0.076374 |              |
| N                          | 3.089540              | 1.535807  | 0.480690  |              |
| H                          | 2.846506              | 1.162577  | 1.395123  |              |
| H                          | 3.991692              | 1.990157  | 0.551451  |              |
| H                          | 3.754029              | 0.791460  | -1.349277 |              |
| C                          | 1.691910              | 0.437767  | -1.165000 |              |
| O                          | 1.263977              | -0.494717 | -1.819525 |              |
| O                          | 0.955067              | 1.516849  | -0.927811 |              |
| H                          | 1.512991              | 2.069033  | -0.314833 |              |
| H                          | 3.572302              | -1.596736 | -0.922511 |              |
| H                          | 4.529164              | -0.840707 | 0.361196  |              |
| S                          | 2.452972              | -1.642763 | 1.231002  |              |
| H                          | 1.458697              | -2.012293 | 0.400331  |              |
| C                          | -3.426461             | -0.764967 | -0.126997 |              |
| C                          | -1.864084             | -0.685739 | -0.226337 |              |
| O                          | -4.036754             | -0.615617 | -1.214448 |              |
| O                          | -3.881748             | -0.991606 | 1.010584  |              |
| H                          | -1.498936             | -1.711637 | -0.316834 |              |
| C                          | -1.198350             | -0.028826 | 0.975975  |              |
| N                          | -1.516159             | 0.008080  | -1.511071 |              |
| H                          | -0.598892             | -0.283380 | -1.884788 |              |
| H                          | -0.114005             | -0.029246 | 0.885634  |              |
| H                          | -1.470362             | -0.595470 | 1.863016  |              |
| S                          | -1.678866             | 1.734191  | 1.213395  |              |
| H                          | -2.289150             | -0.189921 | -2.161598 |              |
| H                          | -1.483045             | 1.021831  | -1.363079 |              |
| H                          | -2.969789             | 1.474445  | 1.507782  |              |
| 28                         |                       |           |           |              |
| Dimer 16 of the n...z type |                       |           |           |              |
| C                          | -2.024908             | -0.578565 | -0.684660 |              |
| C                          | -1.207675             | 0.680505  | -0.977110 |              |
| N                          | -3.440979             | -0.534284 | -1.068866 |              |
| H                          | -3.826875             | 0.401548  | -0.982978 |              |
| H                          | -3.582968             | -0.846939 | -2.021393 |              |
| H                          | -1.550950             | -1.403614 | -1.228753 |              |
| C                          | -1.939169             | -1.005408 | 0.788778  |              |
| O                          | -0.919602             | -0.979013 | 1.450632  |              |
| O                          | -3.078566             | -1.460521 | 1.286532  |              |
| H                          | -3.727758             | -1.358211 | 0.538770  |              |
| H                          | -0.176219             | 0.531242  | -0.678491 |              |
| H                          | -1.233393             | 0.872346  | -2.049635 |              |
| S                          | -1.803411             | 2.189361  | -0.087748 |              |
| H                          | -0.665329             | 2.345794  | 0.627873  |              |
| C                          | 2.109133              | 1.295718  | 0.070440  |              |
| C                          | 2.688558              | -0.014451 | 0.697514  |              |
| O                          | 1.391486              | 1.972660  | 0.851728  |              |
| O                          | 2.432074              | 1.534023  | -1.107558 |              |
| H                          | 3.624664              | 0.261550  | 1.190825  |              |
| C                          | 2.983863              | -1.141016 | -0.282008 |              |
| N                          | 1.751068              | -0.451667 | 1.785876  |              |
| H                          | 2.137139              | -1.195734 | 2.367191  |              |
| H                          | 3.375511              | -2.015332 | 0.240880  |              |
| H                          | 3.742594              | -0.790531 | -0.978131 |              |
| S                          | 1.531507              | -1.740419 | -1.247969 |              |

| Nov 11, 22 15:56           | dimers_structures.xyz |           |           | Page 114/325 |
|----------------------------|-----------------------|-----------|-----------|--------------|
| H                          | 1.541022              | 0.366459  | 2.365224  |              |
| H                          | 0.831712              | -0.759092 | 1.410748  |              |
| H                          | 1.408635              | -0.621673 | -1.990354 |              |
| 28                         |                       |           |           |              |
| Dimer 17 of the n...z type |                       |           |           |              |
| C                          | -3.782794             | 0.476517  | 0.377008  |              |
| C                          | -3.602234             | -0.984675 | 0.824471  |              |
| N                          | -4.677320             | 0.571266  | -0.769253 |              |
| H                          | -4.258058             | 0.080767  | -1.555778 |              |
| H                          | -4.756190             | 1.541086  | -1.060356 |              |
| H                          | -4.237107             | 1.007723  | 1.221419  |              |
| C                          | -2.402249             | 1.109416  | 0.149954  |              |
| O                          | -2.051326             | 1.578117  | -0.916501 |              |
| O                          | -1.642734             | 1.048521  | 1.233911  |              |
| H                          | -0.662989             | 1.210318  | 0.996837  |              |
| H                          | -3.080523             | -1.022163 | 1.778510  |              |
| H                          | -4.583204             | -1.446731 | 0.936032  |              |
| S                          | -2.687221             | -2.041944 | -0.386462 |              |
| H                          | -1.468703             | -1.468636 | -0.219016 |              |
| C                          | 1.199279              | 0.198321  | 0.016688  |              |
| C                          | 2.671243              | 0.194464  | -0.471836 |              |
| O                          | 0.844226              | 1.246784  | 0.634773  |              |
| O                          | 0.549931              | -0.831374 | -0.206764 |              |
| H                          | 2.724429              | -0.195880 | -1.486029 |              |
| C                          | 3.516255              | -0.657583 | 0.476926  |              |
| N                          | 3.184259              | 1.609724  | -0.501237 |              |
| H                          | 2.853009              | 2.111011  | -1.326701 |              |
| H                          | 3.106710              | -1.665770 | 0.480968  |              |
| H                          | 3.464651              | -0.262063 | 1.493351  |              |
| S                          | 5.309446              | -0.703843 | 0.058254  |              |
| H                          | 2.815102              | 2.105406  | 0.319272  |              |
| H                          | 4.210393              | 1.630540  | -0.500361 |              |
| H                          | 5.170522              | -1.315083 | -1.135983 |              |
| 28                         |                       |           |           |              |
| Dimer 18 of the n...z type |                       |           |           |              |
| C                          | 3.788120              | 0.473776  | -0.294904 |              |
| C                          | 3.611969              | -0.949970 | -0.850089 |              |
| N                          | 4.633776              | 0.477141  | 0.891864  |              |
| H                          | 4.183017              | -0.075270 | 1.617793  |              |
| H                          | 4.695265              | 1.420614  | 1.262879  |              |
| H                          | 4.283734              | 1.056054  | -1.080644 |              |
| C                          | 2.407235              | 1.112783  | -0.082756 |              |
| O                          | 2.031007              | 1.544185  | 0.990775  |              |
| O                          | 1.680268              | 1.106186  | -1.190211 |              |
| H                          | 0.694191              | 1.269372  | -0.977167 |              |
| H                          | 3.127130              | -0.914709 | -1.823397 |              |
| H                          | 4.591858              | -1.415692 | -0.956349 |              |
| S                          | 2.641503              | -2.077433 | 0.249544  |              |
| H                          | 1.443960              | -1.452976 | 0.115252  |              |
| C                          | -1.189645             | 0.274231  | -0.036772 |              |
| C                          | -2.668999             | 0.275890  | 0.428466  |              |
| O                          | -0.820381             | 1.309245  | -0.667609 |              |
| O                          | -0.543537             | -0.747923 | 0.228549  |              |
| H                          | -2.716730             | 0.021767  | 1.486403  |              |
| C                          | -3.475541             | -0.725752 | -0.399056 |              |
| N                          | -3.241053             | 1.660573  | 0.276588  |              |
| H                          | -2.889036             | 2.290000  | 0.999158  |              |
| H                          | -3.023752             | -1.707323 | -0.272728 |              |
| H                          | -3.437981             | -0.466172 | -1.459030 |              |
| S                          | -5.266552             | -0.790419 | 0.027708  |              |
| H                          | -2.944879             | 2.051699  | -0.623894 |              |
| H                          | -4.265859             | 1.639917  | 0.331328  |              |
| H                          | -5.106889             | -1.254926 | 1.283852  |              |
| 28                         |                       |           |           |              |
| Dimer 19 of the n...z type |                       |           |           |              |
| C                          | -3.069538             | 0.521620  | 0.562367  |              |
| C                          | -3.252468             | -0.284720 | -0.737487 |              |
| N                          | -3.238583             | 1.948376  | 0.323945  |              |
| H                          | -2.485705             | 2.274754  | -0.277098 |              |

| Nov 11, 22 15:56           |           |           | dimers_structures.xyz | Page 115/325 |
|----------------------------|-----------|-----------|-----------------------|--------------|
| H                          | -3.138981 | 2.456823  | 1.197378              |              |
| H                          | -3.851325 | 0.182665  | 1.250347              |              |
| C                          | -1.722101 | 0.145892  | 1.188021              |              |
| O                          | -0.779405 | 0.910463  | 1.249950              |              |
| O                          | -1.693479 | -1.118404 | 1.598357              |              |
| H                          | -0.735301 | -1.405591 | 1.740993              |              |
| H                          | -3.248246 | -1.351548 | -0.520470             |              |
| H                          | -4.209551 | -0.016754 | -1.184930             |              |
| S                          | -1.983799 | 0.054453  | -2.040656             |              |
| H                          | -0.968616 | -0.626260 | -1.456136             |              |
| C                          | 1.125550  | -1.541221 | 0.407429              |              |
| C                          | 2.430112  | -0.750814 | 0.134258              |              |
| O                          | 0.453000  | -1.859760 | -0.595610             |              |
| O                          | 0.846440  | -1.707649 | 1.620967              |              |
| H                          | 3.226923  | -1.069810 | 0.802582              |              |
| C                          | 2.134693  | 0.740209  | 0.303604              |              |
| N                          | 2.863949  | -1.033588 | -1.278605             |              |
| H                          | 3.365142  | -1.919937 | -1.350967             |              |
| H                          | 1.785475  | 0.907840  | 1.318665              |              |
| H                          | 1.330328  | 1.046850  | -0.366848             |              |
| S                          | 3.559111  | 1.841632  | -0.085486             |              |
| H                          | 2.013834  | -1.115355 | -1.853161             |              |
| H                          | 3.472352  | -0.288283 | -1.635301             |              |
| H                          | 4.371170  | 1.400721  | 0.897369              |              |
| 28                         |           |           |                       |              |
| Dimer 20 of the n...z type |           |           |                       |              |
| C                          | 2.719706  | -0.073181 | 0.700860              |              |
| C                          | 1.940332  | 1.241646  | 0.859919              |              |
| N                          | 3.753836  | -0.098121 | -0.337106             |              |
| H                          | 3.583975  | 0.616715  | -1.040082             |              |
| H                          | 4.681071  | 0.038768  | 0.045010              |              |
| C                          | 3.181061  | -0.291870 | 1.669263              |              |
| C                          | 1.755030  | -1.248788 | 0.468148              |              |
| O                          | 0.759866  | -1.423057 | 1.146260              |              |
| O                          | 2.123092  | -2.071648 | -0.497365             |              |
| H                          | 2.966047  | -1.666159 | -0.844082             |              |
| H                          | 1.120749  | 1.085976  | 1.560585              |              |
| H                          | 2.603533  | 2.009928  | 1.257279              |              |
| S                          | 1.283371  | 1.939282  | -0.715192             |              |
| O                          | 0.566904  | 0.853844  | -1.115960             |              |
| C                          | -1.744126 | -0.068422 | -1.442654             |              |
| C                          | -2.617372 | -0.796159 | -0.377788             |              |
| O                          | -0.632658 | -0.601564 | -1.693172             |              |
| O                          | -2.236881 | 0.974875  | -1.909539             |              |
| H                          | -3.476181 | -1.242205 | -0.884965             |              |
| C                          | -3.133896 | 0.144499  | 0.705197              |              |
| N                          | -1.822583 | -1.932173 | 0.205786              |              |
| H                          | -2.352056 | -2.456906 | 0.903179              |              |
| H                          | -3.732964 | -0.394253 | 1.441610              |              |
| H                          | -3.766846 | 0.884877  | 0.220896              |              |
| S                          | -1.820142 | 1.005854  | 1.669232              |              |
| H                          | -1.542088 | -2.569077 | -0.541238             |              |
| H                          | -0.929661 | -1.608697 | 0.628895              |              |
| H                          | -1.273760 | 1.667946  | 0.626240              |              |
| 28                         |           |           |                       |              |
| Dimer 21 of the n...z type |           |           |                       |              |
| C                          | 3.788481  | 0.473532  | -0.292576             |              |
| C                          | 3.611916  | -0.948887 | -0.851043             |              |
| N                          | 4.633278  | 0.473823  | 0.894802              |              |
| H                          | 4.181615  | -0.079773 | 1.619268              |              |
| H                          | 4.695168  | 1.416488  | 1.267817              |              |
| H                          | 4.284994  | 1.057258  | -1.076671             |              |
| C                          | 2.407791  | 1.112840  | -0.080050             |              |
| O                          | 2.030998  | 1.542088  | 0.994148              |              |
| O                          | 1.681650  | 1.108987  | -1.188076             |              |
| H                          | 0.695429  | 1.271929  | -0.975546             |              |
| H                          | 3.127945  | -0.911185 | -1.824687             |              |
| H                          | 4.591606  | -1.414985 | -0.957459             |              |
| S                          | 2.639874  | -2.078204 | 0.245264              |              |

| Nov 11, 22 15:56           |           |           | dimers_structures.xyz | Page 116/325 |
|----------------------------|-----------|-----------|-----------------------|--------------|
| H                          | 1.442967  | -1.452225 | 0.112251              |              |
| C                          | -1.189520 | 0.276318  | -0.037909             |              |
| C                          | -2.669074 | 0.278076  | 0.426714              |              |
| O                          | -0.819507 | 1.311540  | -0.667907             |              |
| O                          | -0.543780 | -0.746046 | 0.227571              |              |
| H                          | -2.716552 | 0.028077  | 1.485663              |              |
| C                          | -3.474571 | -0.727955 | -0.396481             |              |
| N                          | -3.242794 | 1.661538  | 0.269588              |              |
| H                          | -2.891401 | 2.294135  | 0.989695              |              |
| H                          | -3.021780 | -1.708470 | -0.265675             |              |
| H                          | -3.437259 | -0.473222 | -1.457635             |              |
| S                          | -5.265544 | -0.792430 | 0.030575              |              |
| H                          | -2.947409 | 2.049834  | -0.632335             |              |
| H                          | -4.267571 | 1.639754  | 0.324549              |              |
| H                          | -5.105456 | -1.251098 | 1.288805              |              |
| 28                         |           |           |                       |              |
| Dimer 22 of the n...z type |           |           |                       |              |
| C                          | 3.571713  | -0.803984 | 0.053594              |              |
| C                          | 3.751494  | 0.695041  | 0.351560              |              |
| N                          | 4.097853  | -1.148316 | -1.260934             |              |
| H                          | 3.558734  | -0.658483 | -1.971046             |              |
| H                          | 3.951556  | -2.137615 | -1.438133             |              |
| H                          | 4.147905  | -1.343831 | 0.813851              |              |
| C                          | 2.099022  | -1.186960 | 0.262570              |              |
| O                          | 1.400801  | -1.652989 | -0.618466             |              |
| O                          | 1.685168  | -0.916816 | 1.490990              |              |
| H                          | 0.662132  | -0.914208 | 1.538303              |              |
| C                          | 3.513651  | 0.900244  | 1.393302              |              |
| H                          | 4.787569  | 0.974830  | 0.160319              |              |
| S                          | 2.729544  | 1.809495  | -0.713919             |              |
| H                          | 1.524242  | 1.480114  | -0.186252             |              |
| C                          | -1.200340 | 0.283589  | 0.897505              |              |
| C                          | -2.722912 | 0.380262  | 0.618094              |              |
| O                          | -0.477271 | 1.162338  | 0.391589              |              |
| O                          | -0.866131 | -0.720498 | 1.579683              |              |
| H                          | -3.284843 | 0.236372  | 1.539082              |              |
| C                          | -3.114077 | -0.670527 | -0.422187             |              |
| N                          | -3.026633 | 1.763818  | 0.110128              |              |
| H                          | -3.060293 | 2.443374  | 0.871915              |              |
| H                          | -2.855820 | -1.649860 | -0.024759             |              |
| H                          | -2.554325 | -0.518727 | -1.347479             |              |
| S                          | -4.889628 | -0.631805 | -0.911457             |              |
| H                          | -2.264356 | 2.054679  | -0.514475             |              |
| H                          | -3.924445 | 1.789105  | -0.385655             |              |
| H                          | -5.388813 | -0.968375 | 0.295502              |              |
| 28                         |           |           |                       |              |
| Dimer 23 of the n...z type |           |           |                       |              |
| C                          | 3.059060  | -0.303045 | -0.414064             |              |
| C                          | 2.122119  | -1.469089 | -0.754385             |              |
| N                          | 3.799263  | -0.389568 | 0.845651              |              |
| H                          | 3.268497  | -0.905737 | 1.543238              |              |
| H                          | 4.694239  | -0.847740 | 0.725570              |              |
| H                          | 3.785433  | -0.231457 | -1.231681             |              |
| C                          | 2.334218  | 1.053448  | -0.467226             |              |
| O                          | 1.492042  | 1.332139  | -1.301631             |              |
| O                          | 2.758277  | 1.923226  | 0.430842              |              |
| H                          | 3.414879  | 1.408423  | 0.974497              |              |
| H                          | 1.576841  | -1.238007 | -1.669709             |              |
| H                          | 2.716013  | -2.365005 | -0.934134             |              |
| S                          | 0.945299  | -1.938179 | 0.588178              |              |
| H                          | 0.397051  | -0.704191 | 0.798311              |              |
| C                          | -1.598838 | 1.331925  | 0.688235              |              |
| C                          | -2.090709 | 0.925992  | -0.734676             |              |
| O                          | -0.455075 | 0.939696  | 1.029431              |              |
| O                          | -2.420089 | 2.006454  | 1.336782              |              |
| H                          | -2.240334 | 1.838710  | -1.314138             |              |
| C                          | -3.404613 | 0.149499  | -0.679007             |              |
| N                          | -1.034870 | 0.129097  | -1.449063             |              |
| H                          | -1.265498 | -0.008633 | -2.434381             |              |

| Nov 11, 22 15:56           | dimers_structures.xyz         | Page 117/325 |
|----------------------------|-------------------------------|--------------|
| H                          | -3.761378 -0.100513 -1.679420 |              |
| H                          | -4.146178 0.777489 -0.190656  |              |
| S                          | -3.275364 -1.461794 0.213378  |              |
| H                          | -0.110092 0.596970 -1.388010  |              |
| H                          | -0.944254 -0.795969 -1.011762 |              |
| H                          | -2.976443 -0.939993 1.420849  |              |
| 28                         |                               |              |
| Dimer 24 of the n...z type |                               |              |
| C                          | -1.385847 0.200382 0.710297   |              |
| C                          | -1.968762 -1.145644 0.265306  |              |
| N                          | -2.116433 0.901445 1.769656   |              |
| H                          | -3.096393 0.631947 1.784329   |              |
| H                          | -1.720271 0.722996 2.683879   |              |
| H                          | -0.364443 0.001595 1.045583   |              |
| C                          | -1.231704 1.149701 -0.485068  |              |
| O                          | -0.766534 0.802837 -1.557911  |              |
| O                          | -1.640325 2.383829 -0.259107  |              |
| H                          | -1.960308 2.357178 0.685709   |              |
| H                          | -1.328142 -1.596557 -0.486947 |              |
| H                          | -2.004104 -1.815943 1.123248  |              |
| S                          | -3.700586 -1.046920 -0.365141 |              |
| H                          | -3.412030 -0.380230 -1.501787 |              |
| C                          | 2.007658 -1.461952 0.616263   |              |
| C                          | 2.576491 -0.821470 -0.690583  |              |
| O                          | 0.924299 -2.080714 0.488003   |              |
| O                          | 2.704612 -1.287998 1.635778   |              |
| H                          | 3.375154 -1.474834 -1.050894  |              |
| C                          | 3.149124 0.577194 -0.497611   |              |
| N                          | 1.505408 -0.850138 -1.747520  |              |
| H                          | 1.879900 -0.701065 -2.685035  |              |
| H                          | 3.416770 1.027302 -1.455026   |              |
| H                          | 4.051351 0.490641 0.103263    |              |
| S                          | 2.009728 1.771558 0.326912    |              |
| H                          | 1.047081 -1.765055 -1.702977  |              |
| H                          | 0.748836 -0.156820 -1.582442  |              |
| H                          | 2.035107 1.156348 1.526859    |              |
| 28                         |                               |              |
| Dimer 25 of the n...z type |                               |              |
| C                          | 3.100572 -1.116221 0.040555   |              |
| C                          | 4.079503 -0.155768 0.727347   |              |
| N                          | 3.330151 -1.383359 -1.380662  |              |
| H                          | 3.731177 -0.571755 -1.844358  |              |
| H                          | 3.950499 -2.171113 -1.521681  |              |
| H                          | 3.141615 -2.069112 0.580063   |              |
| C                          | 1.651425 -0.642781 0.207915   |              |
| O                          | 1.229799 -0.116350 1.222842   |              |
| O                          | 0.879341 -0.868575 -0.841852  |              |
| H                          | 1.497025 -1.253996 -1.522249  |              |
| H                          | 3.842504 -0.073135 1.786915   |              |
| H                          | 5.092614 -0.543751 0.622792   |              |
| S                          | 4.111553 1.531955 -0.017225   |              |
| H                          | 2.887160 1.901913 0.410487    |              |
| C                          | -3.119001 1.379756 -0.576402  |              |
| C                          | -1.953307 0.390367 -0.250725  |              |
| O                          | -3.155589 2.415693 0.133164   |              |
| O                          | -3.862992 1.043974 -1.519694  |              |
| H                          | -1.127822 0.625430 -0.925353  |              |
| C                          | -2.304469 -1.081166 -0.418749 |              |
| N                          | -1.459251 0.675888 1.136553   |              |
| H                          | -0.462790 0.404963 1.260085   |              |
| H                          | -1.443761 -1.710682 -0.193120 |              |
| H                          | -2.599772 -1.246689 -1.451944 |              |
| S                          | -3.662120 -1.643598 0.696873  |              |
| H                          | -1.602023 1.681197 1.297646   |              |
| H                          | -2.035466 0.175678 1.820309   |              |
| H                          | -4.607836 -0.845546 0.158956  |              |
| 28                         |                               |              |
| Dimer 26 of the n...z type |                               |              |
| C                          | -3.091455 -0.502937 -0.058736 |              |

| Nov 11, 22 15:56           | dimers_structures.xyz         | Page 118/325 |
|----------------------------|-------------------------------|--------------|
| C                          | -3.089072 0.991930 -0.409567  |              |
| N                          | -3.330223 -0.840139 1.348318  |              |
| H                          | -2.967127 -0.115443 1.962630  |              |
| H                          | -4.316265 -0.960120 1.545018  |              |
| H                          | -3.871580 -0.981101 -0.661389 |              |
| C                          | -1.789803 -1.179904 -0.505627 |              |
| O                          | -1.195318 -0.932734 -1.526560 |              |
| O                          | -1.340295 -2.104226 0.358368  |              |
| H                          | -1.975962 -2.061189 1.123783  |              |
| H                          | -2.881076 1.125706 -1.470098  |              |
| H                          | -4.074225 1.403684 -0.191508  |              |
| S                          | -1.885484 1.995308 0.569307   |              |
| H                          | -0.788262 1.805881 -0.215583  |              |
| C                          | 1.397078 0.492473 -1.121312   |              |
| C                          | 1.300315 -0.190848 0.276234   |              |
| O                          | 1.975542 -0.174424 -2.011005  |              |
| O                          | 0.936245 1.652410 -1.175126   |              |
| H                          | 0.304289 -0.050262 0.688592   |              |
| C                          | 2.306941 0.415346 1.252096    |              |
| N                          | 1.514192 -1.664924 0.072873   |              |
| H                          | 2.162513 -2.080830 0.742312   |              |
| H                          | 2.175610 -0.003793 2.251048   |              |
| H                          | 2.114744 1.486411 1.299862    |              |
| S                          | 4.076932 0.105740 0.832861    |              |
| H                          | 0.618359 -2.163762 0.112062   |              |
| H                          | 1.913290 -1.735303 -0.881765  |              |
| H                          | 4.024561 0.568711 -0.433425   |              |
| 28                         |                               |              |
| Dimer 27 of the n...z type |                               |              |
| C                          | 3.128844 0.658325 0.142488    |              |
| C                          | 3.315171 -0.842041 -0.115153  |              |
| N                          | 2.980223 1.063916 1.543253    |              |
| H                          | 2.502819 0.344120 2.080745    |              |
| H                          | 3.875641 1.245378 1.979913    |              |
| H                          | 3.998678 1.178931 -0.273256   |              |
| C                          | 1.928793 1.202875 -0.643933   |              |
| O                          | 1.603574 0.828122 -1.747760   |              |
| O                          | 1.239980 2.144234 0.011394    |              |
| H                          | 1.679909 2.197326 0.903188    |              |
| H                          | 3.478208 -1.024504 -1.176135  |              |
| H                          | 4.186490 -1.191112 0.438598   |              |
| S                          | 1.894640 -1.874289 0.456235   |              |
| H                          | 1.069572 -1.593617 -0.575918  |              |
| C                          | -1.508923 -1.283533 -0.333833 |              |
| C                          | -1.375270 0.184679 0.187217   |              |
| O                          | -1.021445 -1.483187 -1.475474 |              |
| O                          | -2.031920 -2.093097 0.453242  |              |
| H                          | -0.423468 0.236040 0.721639   |              |
| C                          | -2.492267 0.639397 1.114696   |              |
| N                          | -1.242880 1.096087 -0.998726  |              |
| H                          | -0.745499 1.958715 -0.766611  |              |
| H                          | -2.327864 1.662304 1.456740   |              |
| H                          | -2.508511 -0.021558 1.977831  |              |
| S                          | -4.155321 0.633511 0.315170   |              |
| H                          | -0.709212 0.588035 -1.717785  |              |
| H                          | -2.168373 1.318025 -1.378526  |              |
| H                          | -4.193968 -0.701065 0.120622  |              |
| 28                         |                               |              |
| Dimer 28 of the n...z type |                               |              |
| C                          | -3.063991 -0.363657 -0.438314 |              |
| C                          | -3.019806 0.117149 1.023325   |              |
| N                          | -3.242949 -1.807791 -0.507451 |              |
| H                          | -2.414358 -2.259438 -0.126877 |              |
| H                          | -3.294049 -2.100185 -1.478698 |              |
| H                          | -3.930309 0.122658 -0.900442  |              |
| C                          | -1.818673 0.141641 -1.175730  |              |
| O                          | -0.979452 -0.598602 -1.647807 |              |
| O                          | -1.747627 1.470163 -1.194372  |              |
| H                          | -0.807514 1.758937 -1.410845  |              |

| Nov 11, 22 15:56           | dimers_structures.xyz |           | Page 119/325 |
|----------------------------|-----------------------|-----------|--------------|
| H                          | -3.039870             | 1.204303  | 1.065355     |
| H                          | -3.890742             | -0.275537 | 1.547548     |
| S                          | -1.545285             | -0.470353 | 1.978834     |
| H                          | -0.686074             | 0.480946  | 1.543210     |
| C                          | 1.169494              | 1.665896  | -0.211905    |
| C                          | 2.384369              | 0.707430  | -0.129411    |
| O                          | 0.616980              | 1.949166  | 0.872428     |
| O                          | 0.815790              | 1.979333  | -1.375389    |
| H                          | 3.158721              | 0.993451  | -0.838015    |
| C                          | 1.885889              | -0.713324 | -0.401054    |
| N                          | 2.968154              | 0.794738  | 1.254861     |
| H                          | 3.550830              | 1.625427  | 1.367342     |
| H                          | 1.435727              | -0.734587 | -1.389611    |
| H                          | 1.107085              | -0.987650 | 0.313828     |
| S                          | 3.181987              | -2.012462 | -0.246614    |
| H                          | 2.190279              | 0.876603  | 1.922350     |
| H                          | 3.536927              | -0.032508 | 1.467750     |
| H                          | 3.950456              | -1.587301 | -1.270647    |
| 28                         |                       |           |              |
| Dimer 29 of the n...z type |                       |           |              |
| C                          | 2.864108              | -0.146259 | 0.769872     |
| C                          | 1.871827              | 1.016494  | 0.650367     |
| N                          | 4.251664              | 0.151293  | 0.406418     |
| H                          | 4.296033              | 0.883135  | -0.298302    |
| H                          | 4.797956              | 0.444298  | 1.206934     |
| H                          | 2.843174              | -0.486237 | 1.810995     |
| C                          | 2.404618              | -1.369500 | -0.043615    |
| O                          | 1.246898              | -1.741060 | -0.113861    |
| O                          | 3.383925              | -2.004997 | -0.660228    |
| H                          | 4.192796              | -1.459382 | -0.453280    |
| H                          | 0.885959              | 0.733909  | 1.009795     |
| H                          | 2.220862              | 1.843332  | 1.269352     |
| S                          | 1.728554              | 1.721264  | -1.046601    |
| H                          | 1.304540              | 0.595730  | -1.656381    |
| C                          | -1.822808             | 1.249781  | 0.343545     |
| C                          | -1.566198             | -0.198234 | -0.191398    |
| O                          | -1.428787             | 1.453692  | 1.521926     |
| O                          | -2.365133             | 2.033299  | -0.454830    |
| H                          | -0.676076             | -0.153358 | -0.819690    |
| C                          | -2.710562             | -0.770507 | -1.014588    |
| N                          | -1.206908             | -1.061323 | 0.984662     |
| H                          | -0.320109             | -1.555094 | 0.807686     |
| H                          | -2.471085             | -1.772281 | -1.374535    |
| H                          | -2.869208             | -0.118614 | -1.870526    |
| S                          | -4.289677             | -0.938912 | -0.076102    |
| H                          | -1.088923             | -0.385909 | 1.764066     |
| H                          | -1.951924             | -1.714593 | 1.232678     |
| H                          | -4.440447             | 0.379520  | 0.167734     |
| 28                         |                       |           |              |
| Dimer 30 of the n...z type |                       |           |              |
| C                          | 2.760537              | 0.205371  | -0.295241    |
| C                          | 2.627617              | -1.288635 | -0.617808    |
| N                          | 2.903321              | 0.606154  | 1.102545     |
| H                          | 2.149490              | 0.208426  | 1.660388     |
| H                          | 3.794640              | 0.311240  | 1.482964     |
| H                          | 3.653641              | 0.557746  | -0.828361    |
| C                          | 1.624596              | 1.037006  | -0.896328    |
| O                          | 0.893807              | 0.674161  | -1.793583    |
| O                          | 1.513521              | 2.256941  | -0.361424    |
| H                          | 2.073903              | 2.230471  | 0.451604     |
| H                          | 2.493600              | -1.414670 | -1.692231    |
| H                          | 3.546214              | -1.796870 | -0.322244    |
| S                          | 1.281406              | -2.168928 | 0.274307     |
| H                          | 0.284091              | -1.369865 | -0.144130    |
| C                          | -1.243560             | 0.231825  | 1.472677     |
| C                          | -2.236958             | 1.010586  | 0.544367     |
| O                          | -0.089336             | 0.718240  | 1.543854     |
| O                          | -1.718923             | -0.766809 | 2.045526     |
| H                          | -2.784869             | 1.710729  | 1.179929     |

| Nov 11, 22 15:56           | dimers_structures.xyz |           | Page 120/325 |
|----------------------------|-----------------------|-----------|--------------|
| C                          | -3.235869             | 0.128852  | -0.191902    |
| N                          | -1.433894             | 1.848633  | -0.411873    |
| H                          | -1.976524             | 2.601062  | -0.836247    |
| H                          | -3.876657             | 0.719221  | -0.848937    |
| H                          | -3.861322             | -0.365800 | 0.547325     |
| S                          | -2.450711             | -1.156227 | -1.258918    |
| H                          | -0.628006             | 2.240454  | 0.092769     |
| H                          | -1.024579             | 1.274370  | -1.162338    |
| H                          | -1.991465             | -1.897830 | -0.230986    |
| 28                         |                       |           |              |
| Dimer 31 of the n...z type |                       |           |              |
| C                          | 2.131084              | 0.100912  | 0.632298     |
| C                          | 2.448681              | -1.403299 | 0.621628     |
| N                          | 0.981211              | 0.402861  | -0.210808    |
| H                          | 1.196216              | 0.195702  | -1.183407    |
| H                          | 0.738188              | 1.389908  | -0.156893    |
| H                          | 1.879246              | 0.363460  | 1.666041     |
| C                          | 3.363118              | 0.931569  | 0.268287     |
| O                          | 3.401238              | 1.752087  | -0.616379    |
| O                          | 4.407867              | 0.630590  | 1.059578     |
| H                          | 5.169647              | 1.175215  | 0.803929     |
| H                          | 3.227959              | -1.631289 | 1.345701     |
| H                          | 1.548052              | -1.954983 | 0.891579     |
| S                          | 2.946441              | -2.060467 | -1.029352    |
| H                          | 4.166883              | -1.486680 | -1.064257    |
| C                          | -2.153699             | 1.792642  | -0.316579    |
| C                          | -2.423322             | 0.255430  | -0.223158    |
| O                          | -1.361251             | 2.269982  | 0.531254     |
| O                          | -2.777132             | 2.370282  | -1.230416    |
| H                          | -2.200892             | -0.193537 | -1.191930    |
| C                          | -3.878102             | -0.009658 | 0.155070     |
| N                          | -1.481496             | -0.358141 | 0.763527     |
| H                          | -0.480682             | -0.221477 | 0.404981     |
| H                          | -4.517959             | 0.486316  | -0.571484    |
| H                          | -4.098039             | 0.401552  | 1.142864     |
| S                          | -4.324413             | -1.798036 | 0.263345     |
| H                          | -1.540807             | 0.138050  | 1.654405     |
| H                          | -1.685481             | -1.348843 | 0.911393     |
| H                          | -4.145121             | -2.079503 | -1.043427    |
| 28                         |                       |           |              |
| Dimer 32 of the n...z type |                       |           |              |
| C                          | -3.662418             | 0.745009  | 0.594614     |
| C                          | -4.213391             | -0.640337 | 0.958968     |
| N                          | -4.617495             | 1.499100  | -0.208246    |
| H                          | -4.776390             | 1.006285  | -1.084150    |
| H                          | -4.210725             | 2.393197  | -0.466300    |
| H                          | -3.514151             | 1.276447  | 1.543145     |
| C                          | -2.261908             | 0.639485  | -0.036196    |
| O                          | -1.946437             | 1.244451  | -1.044836    |
| O                          | -1.460104             | -0.160935 | 0.645213     |
| H                          | -0.514215             | -0.195133 | 0.242873     |
| H                          | -3.575803             | -1.123453 | 1.695766     |
| H                          | -5.215058             | -0.528195 | 1.374150     |
| S                          | -4.407940             | -1.779385 | -0.484707    |
| H                          | -3.090286             | -1.984054 | -0.688905    |
| C                          | 1.709465              | 0.540729  | 0.037379     |
| C                          | 3.171215              | 0.294018  | -0.424641    |
| O                          | 1.482910              | 1.577134  | 0.684509     |
| O                          | 0.915249              | -0.388228 | -0.272818    |
| H                          | 3.190501              | 0.028271  | -1.480065    |
| C                          | 3.796244              | -0.817801 | 0.419659     |
| N                          | 3.943994              | 1.574760  | -0.263126    |
| H                          | 3.770334              | 2.215339  | -1.038320    |
| H                          | 3.204045              | -1.719532 | 0.279246     |
| H                          | 3.772433              | -0.553973 | 1.478933     |
| S                          | 5.567709              | -1.154973 | 0.041013     |
| H                          | 3.618445              | 2.044953  | 0.590823     |
| H                          | 4.952909              | 1.393401  | -0.214465    |
| H                          | 5.377989              | -1.566812 | -1.229264    |

| Nov 11, 22 15:56           | dimers_structures.xyz         | Page 121/325 |
|----------------------------|-------------------------------|--------------|
| 28                         |                               |              |
| Dimer 33 of the n...z type |                               |              |
| C                          | 1.530220 0.249092 -0.083370   |              |
| C                          | 2.629119 0.987680 -0.853412   |              |
| N                          | 1.198752 0.772704 1.242118    |              |
| H                          | 1.987612 1.254099 1.663512    |              |
| H                          | 0.403699 1.401855 1.164887    |              |
| H                          | 0.621978 0.310541 -0.688423   |              |
| C                          | 1.842354 -1.252368 0.023642   |              |
| O                          | 2.302281 -1.910156 -0.883362  |              |
| O                          | 1.543261 -1.774913 1.213178   |              |
| H                          | 1.243991 -0.990101 1.746711   |              |
| H                          | 2.761075 0.540922 -1.837678   |              |
| H                          | 2.342007 2.032177 -0.975997   |              |
| S                          | 4.259230 1.023131 0.012711    |              |
| H                          | 4.511850 -0.297569 -0.095267  |              |
| C                          | -2.430094 1.461714 -0.144966  |              |
| C                          | -2.878849 0.263249 0.758883   |              |
| O                          | -3.347533 2.004301 -0.804257  |              |
| O                          | -1.218120 1.751600 -0.090533  |              |
| H                          | -2.994774 0.653450 1.772038   |              |
| C                          | -1.902133 -0.904097 0.785727  |              |
| N                          | -4.245934 -0.156012 0.289784  |              |
| H                          | -4.860290 -0.473987 1.038697  |              |
| H                          | -2.251965 -1.695326 1.450483  |              |
| H                          | -0.951676 -0.537341 1.160096  |              |
| S                          | -1.659784 -1.716093 -0.851124 |              |
| H                          | -4.632712 0.679679 -0.184502  |              |
| H                          | -4.168482 -0.898738 -0.413712 |              |
| H                          | -1.246568 -0.612436 -1.506728 |              |
| 28                         |                               |              |
| Dimer 34 of the n...z type |                               |              |
| C                          | 2.056182 -0.331860 0.782479   |              |
| C                          | 2.194792 1.170437 0.525095    |              |
| N                          | 3.213604 -1.020681 1.357194   |              |
| H                          | 4.082782 -0.639105 0.991688   |              |
| H                          | 3.231515 -0.938410 2.366442   |              |
| H                          | 1.207104 -0.464053 1.461950   |              |
| C                          | 1.621730 -1.086157 -0.477516  |              |
| O                          | 0.914253 -0.602358 -1.342281  |              |
| O                          | 2.057132 -2.335542 -0.538236  |              |
| H                          | 2.660658 -2.422055 0.245857   |              |
| H                          | 1.247116 1.574507 0.176539    |              |
| H                          | 2.456889 1.667579 1.459169    |              |
| S                          | 3.536007 1.606745 -0.665312   |              |
| H                          | 2.928221 1.098584 -1.756580   |              |
| C                          | -1.225421 0.125600 0.790471   |              |
| C                          | -1.819758 0.493641 -0.600776  |              |
| O                          | -1.131911 -1.098220 1.048056  |              |
| O                          | -0.916255 1.105625 1.497625   |              |
| H                          | -1.148737 1.199408 -1.089632  |              |
| C                          | -3.206916 1.117007 -0.477784  |              |
| N                          | -1.841841 -0.743143 -1.455148 |              |
| H                          | -0.863698 -1.001781 -1.657862 |              |
| H                          | -3.593058 1.413355 -1.454975  |              |
| H                          | -3.117222 2.008172 0.141224   |              |
| S                          | -4.491080 -0.003448 0.230470  |              |
| H                          | -2.261153 -1.509368 -0.920317 |              |
| H                          | -2.351441 -0.616731 -2.330360 |              |
| H                          | -3.909544 -0.164136 1.436879  |              |
| 28                         |                               |              |
| Dimer 35 of the n...z type |                               |              |
| C                          | -3.089930 0.508328 0.068296   |              |
| C                          | -3.087461 -0.989325 0.406985  |              |
| N                          | -3.337530 0.857359 -1.334324  |              |
| H                          | -2.977823 0.138123 -1.956966  |              |
| H                          | -4.324799 0.978406 -1.524044  |              |
| H                          | -3.865294 0.982798 0.679999   |              |
| C                          | -1.784295 1.179731 0.511619   |              |

| Nov 11, 22 15:56           | dimers_structures.xyz         | Page 122/325 |
|----------------------------|-------------------------------|--------------|
| O                          | -1.182173 0.922470 1.525815   |              |
| O                          | -1.339494 2.110857 -0.346996  |              |
| H                          | -1.980186 2.075665 -1.108552  |              |
| H                          | -2.871053 -1.132077 1.464654  |              |
| H                          | -4.075142 -1.397476 0.193684  |              |
| S                          | -1.893716 -1.986927 -0.589931 |              |
| H                          | -0.791849 -1.814293 0.191555  |              |
| C                          | 1.400837 -0.526095 1.114643   |              |
| C                          | 1.300886 0.191649 -0.265322   |              |
| O                          | 1.971500 0.122990 2.022527    |              |
| O                          | 0.947142 -1.689807 1.138934   |              |
| H                          | 0.303547 0.060349 -0.677260   |              |
| C                          | 2.303782 -0.389064 -1.260487  |              |
| N                          | 1.514294 1.660133 -0.024764   |              |
| H                          | 0.623858 2.166306 -0.079579   |              |
| H                          | 2.164591 0.051063 -2.249370   |              |
| H                          | 2.115985 -1.459696 -1.330022  |              |
| S                          | 4.074676 -0.080177 -0.844835  |              |
| H                          | 1.887689 1.705940 0.942213    |              |
| H                          | 2.187096 2.084183 -0.664226   |              |
| H                          | 4.031956 -0.571495 0.411134   |              |
| 28                         |                               |              |
| Dimer 36 of the n...z type |                               |              |
| C                          | -3.711539 -0.752091 -0.844645 |              |
| C                          | -4.171553 0.712347 -0.821082  |              |
| N                          | -4.710410 -1.630004 -0.248510 |              |
| H                          | -4.832445 -1.379218 0.729898  |              |
| H                          | -4.364656 -2.584912 -0.246558 |              |
| H                          | -3.600716 -1.022691 -1.902088 |              |
| C                          | -2.306576 -0.897186 -0.233492 |              |
| O                          | -2.035178 -1.730287 0.611435  |              |
| O                          | -1.447348 -0.026383 -0.738019 |              |
| H                          | -0.510802 -0.132599 -0.338357 |              |
| H                          | -3.504506 1.331471 -1.416664  |              |
| H                          | -5.179130 0.776592 -1.232098  |              |
| S                          | -4.289066 1.440902 0.874723   |              |
| H                          | -2.960877 1.499806 1.103489   |              |
| C                          | 1.730210 0.697666 -0.036486   |              |
| C                          | 3.185334 0.458147 0.451129    |              |
| O                          | 0.929154 -0.257187 0.206802   |              |
| O                          | 1.519538 1.753379 -0.641522   |              |
| H                          | 3.570282 1.354944 0.932469    |              |
| C                          | 4.059257 0.070582 -0.742993   |              |
| N                          | 3.180869 -0.644518 1.477058   |              |
| H                          | 2.896263 -0.299767 2.394778   |              |
| H                          | 4.018856 0.880924 -1.468181   |              |
| H                          | 3.676437 -0.834988 -1.218005  |              |
| S                          | 5.810342 -0.305447 -0.310551  |              |
| H                          | 2.483269 -1.342665 1.189162   |              |
| H                          | 4.108341 -1.074018 1.568173   |              |
| H                          | 6.125934 0.928541 0.133219    |              |
| 28                         |                               |              |
| Dimer 37 of the n...z type |                               |              |
| C                          | 1.740643 0.320332 0.169373    |              |
| C                          | 2.243375 -0.804558 1.085285   |              |
| N                          | 0.670235 -0.146280 -0.711138  |              |
| H                          | 1.001613 -0.941687 -1.255157  |              |
| H                          | 0.447019 0.577071 -1.389971   |              |
| H                          | 1.326633 1.100018 0.819487    |              |
| C                          | 2.881712 0.983897 -0.602960   |              |
| O                          | 2.858935 1.218637 -1.787346   |              |
| O                          | 3.910040 1.294511 0.204254    |              |
| H                          | 4.602210 1.734775 -0.314786   |              |
| H                          | 2.938086 -0.406999 1.821604   |              |
| H                          | 1.398685 -1.245799 1.614380   |              |
| S                          | 3.045096 -2.207899 0.194431   |              |
| H                          | 4.166314 -1.543833 -0.154893  |              |
| C                          | -3.692445 -1.012017 -0.386260 |              |
| C                          | -2.794594 -0.061558 0.479509  |              |

| Nov 11, 22 15:56           |           | dimers_structures.xyz |           | Page 123/325 |
|----------------------------|-----------|-----------------------|-----------|--------------|
| O                          | -3.324425 | -2.213363             | -0.427312 |              |
| O                          | -4.682481 | -0.472877             | -0.916744 |              |
| H                          | -3.351083 | 0.166114              | 1.389869  |              |
| C                          | -2.453211 | 1.228555              | -0.255629 |              |
| N                          | -1.562151 | -0.819674             | 0.879155  |              |
| H                          | -1.290181 | -0.641108             | 1.843344  |              |
| H                          | -3.379999 | 1.740341              | -0.501593 |              |
| H                          | -1.932874 | 1.012954              | -1.189909 |              |
| S                          | -1.334497 | 2.363146              | 0.675101  |              |
| H                          | -1.803645 | -1.814468             | 0.746694  |              |
| H                          | -0.731894 | -0.593726             | 0.251812  |              |
| H                          | -2.166481 | 2.590912              | 1.711761  |              |
| 28                         |           |                       |           |              |
| Dimer 38 of the n...z type |           |                       |           |              |
| C                          | -2.552058 | -0.596008             | -0.815990 |              |
| C                          | -2.172690 | 0.887836              | -0.638747 |              |
| N                          | -3.907099 | -0.859138             | -0.362300 |              |
| H                          | -3.968915 | -0.716751             | 0.642067  |              |
| H                          | -4.149174 | -1.830120             | -0.533136 |              |
| H                          | -2.491536 | -0.800090             | -1.889377 |              |
| C                          | -1.474890 | -1.450067             | -0.138156 |              |
| O                          | -1.623510 | -2.010218             | 0.926593  |              |
| O                          | -0.333467 | -1.457447             | -0.828950 |              |
| H                          | 0.464737  | -1.874985             | -0.321809 |              |
| H                          | -1.180586 | 1.073595              | -1.049331 |              |
| H                          | -2.887049 | 1.501868              | -1.187226 |              |
| S                          | -2.259325 | 1.519911              | 1.094611  |              |
| H                          | -1.480218 | 0.581409              | 1.670259  |              |
| C                          | 2.674985  | -1.250533             | 0.479502  |              |
| C                          | 2.510817  | 0.108005              | -0.267011 |              |
| O                          | 1.838846  | -2.166258             | 0.200551  |              |
| O                          | 3.589644  | -1.288160             | 1.307569  |              |
| H                          | 3.490136  | 0.571375              | -0.367396 |              |
| C                          | 1.566236  | 1.012352              | 0.525163  |              |
| N                          | 1.984544  | -0.086953             | -1.669764 |              |
| H                          | 2.585595  | -0.711040             | -2.209745 |              |
| H                          | 1.973676  | 1.141582              | 1.526309  |              |
| H                          | 0.585349  | 0.547366              | 0.618120  |              |
| S                          | 1.254909  | 2.657366              | -0.243112 |              |
| H                          | 1.035068  | -0.489423             | -1.656698 |              |
| H                          | 1.931071  | 0.813859              | -2.155756 |              |
| H                          | 2.533890  | 3.084708              | -0.200489 |              |
| 28                         |           |                       |           |              |
| Dimer 39 of the n...z type |           |                       |           |              |
| C                          | -1.767046 | 0.606682              | -0.223245 |              |
| C                          | -1.480297 | -0.733288             | -0.909752 |              |
| N                          | -1.104138 | 0.859342              | 1.055328  |              |
| H                          | -0.983976 | 0.008153              | 1.596503  |              |
| H                          | -0.210394 | 1.331252              | 0.939213  |              |
| H                          | -1.435864 | 1.382567              | -0.920729 |              |
| C                          | -3.280801 | 0.824327              | -0.049639 |              |
| O                          | -4.113501 | 0.471726              | -0.856478 |              |
| O                          | -3.598558 | 1.469076              | 1.073318  |              |
| H                          | -2.724325 | 1.573628              | 1.537860  |              |
| H                          | -2.057959 | -0.805913             | -1.829949 |              |
| H                          | -0.423189 | -0.783941             | -1.163424 |              |
| S                          | -1.835775 | -2.210492             | 0.136462  |              |
| H                          | -3.171594 | -2.031336             | 0.199372  |              |
| C                          | 1.769561  | 1.346430              | -0.552026 |              |
| C                          | 3.106731  | 0.540824              | -0.559613 |              |
| O                          | 1.600196  | 2.111544              | 0.435844  |              |
| O                          | 1.008624  | 1.126821              | -1.507773 |              |
| H                          | 3.727916  | 0.927720              | -1.368084 |              |
| C                          | 2.881857  | -0.954693             | -0.767849 |              |
| N                          | 3.818150  | 0.825259              | 0.736960  |              |
| H                          | 4.825734  | 0.943678              | 0.638793  |              |
| H                          | 3.828088  | -1.487616             | -0.868078 |              |
| H                          | 2.304643  | -1.081223             | -1.681189 |              |
| S                          | 2.013936  | -1.773748             | 0.640803  |              |

Nov 11, 22 15:56

dimers\_structures.xyz

Page 124/325

|                            |           |           |           |
|----------------------------|-----------|-----------|-----------|
| H                          | 3.371614  | 1.682853  | 1.108021  |
| H                          | 3.631479  | 0.075710  | 1.413714  |
| H                          | 0.912145  | -0.998438 | 0.619461  |
| 28                         |           |           |           |
| Dimer 40 of the n...z type |           |           |           |
| C                          | -2.144323 | 0.260793  | 0.782745  |
| C                          | -1.986634 | -1.221169 | 0.428010  |
| N                          | -3.438687 | 0.667904  | 1.334807  |
| H                          | -4.198898 | 0.155446  | 0.894140  |
| H                          | -3.484706 | 0.503782  | 2.333181  |
| H                          | -1.365387 | 0.503169  | 1.514005  |
| C                          | -1.814109 | 1.170642  | -0.407918 |
| O                          | -0.985880 | 0.905736  | -1.253977 |
| O                          | -2.498806 | 2.311113  | -0.418883 |
| H                          | -3.137637 | 2.221545  | 0.334678  |
| H                          | -0.965758 | -1.436447 | 0.121807  |
| H                          | -2.208770 | -1.821557 | 1.310320  |
| S                          | -3.149074 | -1.809500 | -0.878695 |
| H                          | -2.583317 | -1.121514 | -1.891273 |
| C                          | 1.314695  | -0.207954 | 0.941623  |
| C                          | 1.740445  | -0.148785 | -0.561036 |
| O                          | 0.928744  | 0.883853  | 1.435520  |
| O                          | 1.375677  | -1.332401 | 1.468708  |
| H                          | 0.949538  | -0.629195 | -1.135314 |
| C                          | 3.065361  | -0.841219 | -0.849048 |
| N                          | 1.745181  | 1.301105  | -0.961422 |
| H                          | 1.254040  | 1.474432  | -1.836753 |
| H                          | 3.306782  | -0.797543 | -1.912030 |
| H                          | 2.970171  | -1.883545 | -0.553007 |
| S                          | 4.507426  | -0.085806 | 0.019072  |
| H                          | 1.243227  | 1.767133  | -0.179354 |
| H                          | 2.694223  | 1.680489  | -1.002949 |
| H                          | 4.067012  | -0.337070 | 1.269364  |
| 28                         |           |           |           |
| Dimer 41 of the n...z type |           |           |           |
| C                          | -1.240270 | 0.067063  | 0.011442  |
| C                          | -2.064286 | -1.071108 | -0.590511 |
| N                          | -1.012654 | 0.024139  | 1.456161  |
| H                          | -1.846055 | -0.303137 | 1.938841  |
| H                          | -0.239313 | -0.595664 | 1.691031  |
| H                          | -0.264749 | 0.030598  | -0.479676 |
| C                          | -1.791143 | 1.448364  | -0.367165 |
| O                          | -2.314499 | 1.701050  | -1.429389 |
| O                          | -1.599573 | 2.374219  | 0.575935  |
| H                          | -1.214834 | 1.866875  | 1.337412  |
| H                          | -2.122332 | -0.960663 | -1.672577 |
| H                          | -1.566074 | -2.011583 | -0.358123 |
| S                          | -3.773250 | -1.200677 | 0.091407  |
| H                          | -4.233857 | -0.053860 | -0.449156 |
| C                          | 1.778729  | -1.467411 | 0.441749  |
| C                          | 2.973964  | -0.791039 | -0.306401 |
| O                          | 1.000322  | -2.132669 | -0.283025 |
| O                          | 1.722166  | -1.263016 | 1.671081  |
| H                          | 3.831524  | -1.462723 | -0.229166 |
| C                          | 3.359178  | 0.581942  | 0.229334  |
| N                          | 2.598900  | -0.734458 | -1.764125 |
| H                          | 3.397177  | -0.772919 | -2.397866 |
| H                          | 4.184547  | 1.007692  | -0.342955 |
| H                          | 3.672618  | 0.468210  | 1.264147  |
| S                          | 1.989850  | 1.818240  | 0.148503  |
| H                          | 1.962353  | -1.533811 | -1.918759 |
| H                          | 2.065173  | 0.119434  | -1.959431 |
| H                          | 1.237508  | 1.241417  | 1.107335  |
| 28                         |           |           |           |
| Dimer 42 of the n...z type |           |           |           |
| C                          | -2.724287 | 0.916160  | -0.216008 |
| C                          | -3.299829 | -0.484926 | -0.514284 |
| N                          | -1.975807 | 1.547674  | -1.289765 |
| H                          | -1.234826 | 0.941358  | -1.633131 |

| Nov 11, 22 15:56           | dimers_structures.xyz |           | Page 125/325 |
|----------------------------|-----------------------|-----------|--------------|
| H -2.590313                | 1.754638              | -2.069394 |              |
| H -3.585537                | 1.555647              | 0.010337  |              |
| C -1.946275                | 0.878060              | 1.107877  |              |
| O -2.439128                | 0.390883              | 2.104438  |              |
| O -0.723937                | 1.403377              | 1.154907  |              |
| H -0.329438                | 1.630866              | 0.271963  |              |
| H -3.889386                | -0.841929             | 0.329205  |              |
| H -3.945148                | -0.420424             | -1.391169 |              |
| S -2.030033                | -1.749881             | -0.945033 |              |
| H -1.464871                | -1.845513             | 0.277267  |              |
| C 2.135555                 | 1.206496              | -0.478725 |              |
| C 2.648345                 | -0.220816             | -0.839872 |              |
| O 2.931683                 | 1.944808              | 0.134443  |              |
| O 0.968835                 | 1.452257              | -0.870846 |              |
| H 2.880279                 | -0.224602             | -1.906571 |              |
| C 1.637446                 | -1.323272             | -0.544319 |              |
| N 3.943125                 | -0.444727             | -0.104757 |              |
| H 4.583980                 | -1.072905             | -0.589722 |              |
| H 2.004544                 | -2.293963             | -0.880065 |              |
| H 0.719675                 | -1.089607             | -1.079534 |              |
| S 1.261151                 | -1.530784             | 1.249730  |              |
| H 4.372051                 | 0.481332              | 0.036251  |              |
| H 3.746981                 | -0.827584             | 0.828098  |              |
| H 0.662232                 | -0.333448             | 1.422937  |              |
| 28                         |                       |           |              |
| Dimer 43 of the n...z type |                       |           |              |
| C -1.762194                | -0.747807             | -0.262426 |              |
| C -1.224166                | 0.416495              | -1.096173 |              |
| N -2.998222                | -1.373403             | -0.742275 |              |
| H -3.619106                | -0.681766             | -1.155434 |              |
| H -2.806890                | -2.082019             | -1.440188 |              |
| H -0.975924                | -1.508573             | -0.241501 |              |
| C -1.946471                | -0.361229             | 1.208951  |              |
| O -1.226920                | 0.412544              | 1.805193  |              |
| O -2.965696                | -0.979882             | 1.804136  |              |
| H -3.400898                | -1.489920             | 1.072711  |              |
| H -0.265139                | 0.749432              | -0.711318 |              |
| H -1.073099                | 0.077911              | -2.119902 |              |
| S -2.362176                | 1.866320              | -1.193230 |              |
| H -2.233578                | 2.234489              | 0.098008  |              |
| C 1.612835                 | -1.410257             | -0.349307 |              |
| C 2.947334                 | -0.595938             | -0.278513 |              |
| O 1.121657                 | -1.519793             | -1.502208 |              |
| O 1.197081                 | -1.871571             | 0.728151  |              |
| H 3.764174                 | -1.319817             | -0.321729 |              |
| C 3.104834                 | 0.264160              | 0.967874  |              |
| N 3.025691                 | 0.222703              | -1.538981 |              |
| H 3.975642                 | 0.376781              | -1.875650 |              |
| H 4.083888                 | 0.744518              | 0.988885  |              |
| H 3.011655                 | -0.383068             | 1.836792  |              |
| S 1.870035                 | 1.628863              | 1.088728  |              |
| H 2.458329                 | -0.298594             | -2.230667 |              |
| H 2.572498                 | 1.132114              | -1.392119 |              |
| H 0.785351                 | 0.854804              | 1.321627  |              |
| 28                         |                       |           |              |
| Dimer 44 of the n...z type |                       |           |              |
| C -3.034135                | -0.237847             | 0.718198  |              |
| C -2.092940                | -1.400635             | 0.382069  |              |
| N -4.337594                | -0.239492             | 0.054217  |              |
| H -4.276551                | -0.657169             | -0.871098 |              |
| H -5.033054                | -0.745783             | 0.588291  |              |
| H -3.199268                | -0.255949             | 1.801214  |              |
| C -2.360949                | 1.119344              | 0.457166  |              |
| O -1.181626                | 1.340754              | 0.669424  |              |
| O -3.175207                | 2.046539              | -0.008688 |              |
| H -4.042756                | 1.571344              | -0.127122 |              |
| H -1.184474                | -1.332919             | 0.978597  |              |
| H -2.585265                | -2.341299             | 0.627742  |              |
| S -1.661821                | -1.535765             | -1.405438 |              |

| Nov 11, 22 15:56           | dimers_structures.xyz |           | Page 126/325 |
|----------------------------|-----------------------|-----------|--------------|
| H -1.048861                | -0.340474             | -1.514429 |              |
| C 2.948735                 | -1.181585             | 0.396620  |              |
| C 1.618572                 | -0.386160             | 0.190756  |              |
| O 3.220946                 | -1.467392             | 1.586964  |              |
| O 3.567844                 | -1.463381             | -0.649108 |              |
| H 0.843867                 | -1.125525             | -0.022993 |              |
| C 1.649189                 | 0.631510              | -0.941118 |              |
| N 1.238949                 | 0.276812              | 1.483321  |              |
| H 0.257016                 | 0.599355              | 1.456704  |              |
| H 0.700539                 | 1.166113              | -1.008207 |              |
| H 1.832143                 | 0.104426              | -1.874159 |              |
| S 2.933964                 | 1.936108              | -0.714026 |              |
| H 1.417584                 | -0.376858             | 2.251084  |              |
| H 1.841175                 | 1.092050              | 1.636261  |              |
| H 3.983489                 | 1.091870              | -0.795882 |              |
| 28                         |                       |           |              |
| Dimer 45 of the n...z type |                       |           |              |
| C -2.036465                | -0.858763             | -0.032720 |              |
| C -3.157177                | -0.333013             | -0.934860 |              |
| N -2.444406                | -1.454499             | 1.241415  |              |
| H -3.273639                | -0.996126             | 1.610822  |              |
| H -2.642343                | -2.442875             | 1.145792  |              |
| H -1.470693                | -1.608139             | -0.593763 |              |
| C -0.989100                | 0.226014              | 0.244967  |              |
| O -0.644122                | 1.049049              | -0.581191 |              |
| O -0.470477                | 0.180352              | 1.464662  |              |
| H -0.957764                | -0.563240             | 1.907839  |              |
| H -2.740390                | 0.043076              | -1.868008 |              |
| H -3.849790                | -1.143917             | -1.160723 |              |
| S -4.182758                | 0.992717              | -0.160221 |              |
| H -3.218635                | 1.935795              | -0.154559 |              |
| C 1.931860                 | -1.455412             | -0.114745 |              |
| C 2.737317                 | -0.404462             | -0.954930 |              |
| O 0.869308                 | -1.853105             | -0.654515 |              |
| O 2.447781                 | -1.801459             | 0.963272  |              |
| H 3.401509                 | -0.975499             | -1.608956 |              |
| C 3.578474                 | 0.569090              | -0.142384 |              |
| N 1.764182                 | 0.304087              | -1.856313 |              |
| H 2.214423                 | 0.796373              | -2.627962 |              |
| H 4.178069                 | 1.206522              | -0.794490 |              |
| H 4.246947                 | -0.018958             | 0.482676  |              |
| S 2.601394                 | 1.721398              | 0.912290  |              |
| H 1.111572                 | -0.403819             | -2.212921 |              |
| H 1.182300                 | 0.965881              | -1.319118 |              |
| H 1.876968                 | 0.771248              | 1.536456  |              |
| 28                         |                       |           |              |
| Dimer 46 of the n...z type |                       |           |              |
| C 2.614365                 | -0.398568             | 0.778086  |              |
| C 2.735814                 | -1.165547             | -0.548774 |              |
| N 2.015371                 | -1.223428             | 1.816771  |              |
| H 1.091912                 | -1.530813             | 1.521316  |              |
| H 1.879652                 | -0.678418             | 2.662567  |              |
| H 3.637204                 | -0.141924             | 1.082364  |              |
| C 1.898412                 | 0.944103              | 0.579986  |              |
| O 1.040221                 | 1.370675              | 1.325423  |              |
| O 2.312668                 | 1.589681              | -0.512571 |              |
| H 1.666649                 | 2.283144              | -0.737198 |              |
| H 3.324637                 | -0.596208             | -1.264111 |              |
| H 3.234821                 | -2.115052             | -0.356829 |              |
| S 1.122408                 | -1.610057             | -1.340026 |              |
| H 0.745406                 | -0.349799             | -1.678016 |              |
| C -1.137074                | 1.712697              | -0.694569 |              |
| C -1.433736                | 0.418306              | 0.117615  |              |
| O -1.760076                | 2.734491              | -0.334284 |              |
| O -0.316650                | 1.572128              | -1.631566 |              |
| H -0.532568                | -0.173219             | 0.214067  |              |
| C -2.511130                | -0.417377             | -0.556715 |              |
| N -1.824173                | 0.821184              | 1.509212  |              |
| H -0.978600                | 1.103767              | 2.014730  |              |



| Nov 11, 22 15:56           | dimers_structures.xyz |           | Page 127/325 |
|----------------------------|-----------------------|-----------|--------------|
| H -2.210103                | -0.588690             | -1.589402 |              |
| H -3.473512                | 0.097231              | -0.559432 |              |
| S -2.789550                | -2.039082             | 0.279416  |              |
| H -2.442264                | 1.639068              | 1.448416  |              |
| H -2.279720                | 0.058893              | 2.019086  |              |
| H -1.536837                | -2.503537             | 0.080540  |              |
| 28                         |                       |           |              |
| Dimer 47 of the n...z type |                       |           |              |
| C -2.242481                | -1.166596             | -0.232967 |              |
| C -3.267131                | -0.109197             | 0.197829  |              |
| N -1.432285                | -1.777582             | 0.809865  |              |
| H -0.983372                | -1.091182             | 1.413910  |              |
| H -1.970566                | -2.416151             | 1.381921  |              |
| H -2.808993                | -1.971068             | -0.719582 |              |
| C -1.313599                | -0.646658             | -1.340858 |              |
| O -1.635714                | 0.180176              | -2.161330 |              |
| O -0.103086                | -1.219498             | -1.349698 |              |
| H -0.053139                | -1.807706             | -0.553740 |              |
| H -3.873659                | 0.203202              | -0.651421 |              |
| H -3.923677                | -0.543683             | 0.952005  |              |
| S -2.532091                | 1.389868              | 0.979258  |              |
| H -2.123187                | 1.959214              | -0.171824 |              |
| C 1.814921                 | -0.894840             | 1.068185  |              |
| C 2.817452                 | -0.031517             | 0.227583  |              |
| O 1.767153                 | -2.099339             | 0.714214  |              |
| O 1.193830                 | -0.316426             | 1.979825  |              |
| H 3.818768                 | -0.268335             | 0.595479  |              |
| C 2.617585                 | 1.474478              | 0.281501  |              |
| N 2.756254                 | -0.551754             | -1.185505 |              |
| H 3.530485                 | -0.231770             | -1.768329 |              |
| H 3.400931                 | 1.991631              | -0.275037 |              |
| H 2.673206                 | 1.780996              | 1.323898  |              |
| S 1.022121                 | 2.049184              | -0.434580 |              |
| H 2.751218                 | -1.577117             | -1.129982 |              |
| H 1.866291                 | -0.275471             | -1.620521 |              |
| H 0.245040                 | 1.421242              | 0.471252  |              |
| 28                         |                       |           |              |
| Dimer 48 of the n...z type |                       |           |              |
| C 2.694552                 | -0.630902             | -0.882602 |              |
| C 1.794402                 | -1.588744             | -0.077304 |              |
| N 4.057026                 | -0.621975             | -0.373628 |              |
| H 4.085505                 | -0.169367             | 0.535774  |              |
| H 4.648548                 | -0.066055             | -0.983490 |              |
| H 2.701025                 | -1.017925             | -1.905869 |              |
| C 2.011916                 | 0.743793              | -0.912548 |              |
| O 2.401929                 | 1.687697              | -0.252910 |              |
| O 0.910199                 | 0.743541              | -1.653276 |              |
| H 0.283656                 | 1.492310              | -1.364320 |              |
| H 0.822480                 | -1.676567             | -0.559674 |              |
| H 2.261856                 | -2.572134             | -0.049890 |              |
| S 1.543652                 | -1.120842             | 1.708521  |              |
| H 1.721455                 | 0.211906              | 1.586390  |              |
| C -1.363982                | 1.766655              | 0.384217  |              |
| C -1.605585                | 0.237424              | 0.204505  |              |
| O -1.786586                | 2.270351              | 1.438739  |              |
| O -0.805690                | 2.338936              | -0.592079 |              |
| H -0.747148                | -0.230146             | -0.266149 |              |
| C -2.850740                | 0.023948              | -0.654783 |              |
| N -1.763992                | -0.384514             | 1.559718  |              |
| H -0.836108                | -0.646615             | 1.928737  |              |
| H -2.693929                | 0.517095              | -1.612502 |              |
| H -3.727082                | 0.467527              | -0.178356 |              |
| S -3.277247                | -1.748585             | -0.923626 |              |
| H -2.187003                | 0.316643              | 2.182487  |              |
| H -2.338794                | -1.232253             | 1.522382  |              |
| H -2.150390                | -2.075392             | -1.589167 |              |
| 28                         |                       |           |              |
| Dimer 49 of the n...z type |                       |           |              |
| C -1.971695                | -0.782687             | -0.704265 |              |

| Nov 11, 22 15:56           | dimers_structures.xyz |           | Page 128/325 |
|----------------------------|-----------------------|-----------|--------------|
| C -2.169229                | -1.344195             | 0.718749  |              |
| N -0.700004                | -0.081147             | -0.840656 |              |
| H -0.772386                | 0.881275              | -0.509916 |              |
| H -0.426291                | -0.030398             | -1.817149 |              |
| H -1.977716                | -1.643997             | -1.377015 |              |
| C -3.168828                | 0.093193              | -1.072263 |              |
| O -3.134773                | 1.298237              | -1.157689 |              |
| O -4.280237                | -0.641616             | -1.240522 |              |
| H -5.029837                | -0.052151             | -1.423055 |              |
| H -3.128373                | -1.855838             | 0.786272  |              |
| H -1.377820                | -2.066295             | 0.922064  |              |
| S -2.031340                | -0.101806             | 2.075075  |              |
| H -2.960363                | 0.762665              | 1.617393  |              |
| C 2.004866                 | 1.896383              | 0.071197  |              |
| C 2.451097                 | 0.441521              | 0.439036  |              |
| O 0.842561                 | 2.223280              | 0.411587  |              |
| O 2.875774                 | 2.571097              | -0.515146 |              |
| H 3.247507                 | 0.511810              | 1.181631  |              |
| C 2.944129                 | -0.314865             | -0.791068 |              |
| N 1.305828                 | -0.290500             | 1.068573  |              |
| H 0.894915                 | 0.267370              | 1.818550  |              |
| H 3.747195                 | 0.258195              | -1.247582 |              |
| H 2.140917                 | -0.419478             | -1.522833 |              |
| S 3.514166                 | -2.038335             | -0.453162 |              |
| H 0.537010                 | -0.407848             | 0.341986  |              |
| H 1.590772                 | -1.203221             | 1.427006  |              |
| H 4.579832                 | -1.702394             | 0.302450  |              |
| 28                         |                       |           |              |
| Dimer 50 of the n...z type |                       |           |              |
| C 2.064567                 | -0.779407             | -0.413137 |              |
| C 1.720524                 | 0.432845              | -1.284544 |              |
| N 1.034981                 | -1.235959             | 0.523346  |              |
| H 0.619152                 | -0.436227             | 0.996025  |              |
| H 0.283201                 | -1.677122             | -0.000342 |              |
| H 2.271076                 | -1.610328             | -1.099185 |              |
| C 3.380844                 | -0.587757             | 0.354187  |              |
| O 4.315583                 | 0.065206              | -0.052072 |              |
| O 3.420319                 | -1.242885             | 1.517992  |              |
| H 2.517067                 | -1.637527             | 1.612628  |              |
| H 2.540671                 | 0.647328              | -1.968590 |              |
| H 0.813697                 | 0.218826              | -1.848114 |              |
| S 1.317172                 | 1.959311              | -0.336757 |              |
| H 2.529890                 | 2.117246              | 0.233954  |              |
| C -1.802734                | -0.375923             | -1.294374 |              |
| C -3.086051                | -0.448940             | -0.402697 |              |
| O -1.197341                | -1.471377             | -1.444975 |              |
| O -1.534141                | 0.740229              | -1.766972 |              |
| H -3.938500                | -0.550053             | -1.077857 |              |
| C -3.299062                | 0.760883              | 0.496401  |              |
| N -3.008587                | -1.726189             | 0.390940  |              |
| H -3.918326                | -2.136295             | 0.601619  |              |
| H -4.224943                | 0.667903              | 1.065409  |              |
| H -3.361675                | 1.644314              | -0.134399 |              |
| S -1.959941                | 0.999640              | 1.742901  |              |
| H -2.432755                | -2.369508             | -0.177042 |              |
| H -2.507197                | -1.563861             | 1.271542  |              |
| H -0.995705                | 1.337534              | 0.859253  |              |
| 28                         |                       |           |              |
| Dimer 51 of the n...z type |                       |           |              |
| C -2.420711                | -0.330523             | 0.835087  |              |
| C -1.300828                | 0.708275              | 0.695603  |              |
| N -2.086461                | -1.646827             | 0.273026  |              |
| H -1.114807                | -1.693680             | -0.046744 |              |
| H -2.219685                | -2.378735             | 0.960820  |              |
| H -2.657969                | -0.401621             | 1.901670  |              |
| C -3.698399                | 0.191658              | 0.150717  |              |
| O -4.228391                | 1.244692              | 0.435968  |              |
| O -4.150289                | -0.616961             | -0.801875 |              |
| H -3.482290                | -1.367143             | -0.786196 |              |

| Nov 11, 22 15:56           |           |           |           | dimers_structures.xyz | Page 129/325 |
|----------------------------|-----------|-----------|-----------|-----------------------|--------------|
| H                          | -1.584043 | 1.627888  | 1.204683  |                       |              |
| H                          | -0.399130 | 0.309590  | 1.157831  |                       |              |
| S                          | -0.853985 | 1.125610  | -1.049269 |                       |              |
| H                          | -1.884012 | 1.970136  | -1.264133 |                       |              |
| C                          | 1.571908  | -1.308864 | 0.375216  |                       |              |
| C                          | 2.994915  | -0.946453 | -0.162618 |                       |              |
| O                          | 0.765446  | -1.711870 | -0.504669 |                       |              |
| O                          | 1.392960  | -1.171995 | 1.597045  |                       |              |
| H                          | 3.611950  | -1.841708 | -0.062080 |                       |              |
| C                          | 3.666196  | 0.210817  | 0.565316  |                       |              |
| N                          | 2.854224  | -0.677939 | -1.636888 |                       |              |
| H                          | 3.685113  | -0.912146 | -2.179895 |                       |              |
| H                          | 4.675109  | 0.380997  | 0.187296  |                       |              |
| H                          | 3.723687  | -0.043848 | 1.620903  |                       |              |
| S                          | 2.780568  | 1.815111  | 0.365027  |                       |              |
| H                          | 2.039073  | -1.234973 | -1.942750 |                       |              |
| H                          | 2.626509  | 0.311766  | -1.789497 |                       |              |
| H                          | 1.645655  | 1.423114  | 0.976032  |                       |              |
| 28                         |           |           |           |                       |              |
| Dimer 52 of the n...z type |           |           |           |                       |              |
| C                          | 2.642540  | 0.343757  | 0.763484  |                       |              |
| C                          | 1.460910  | 1.257557  | 0.422416  |                       |              |
| N                          | 3.933787  | 0.687183  | 0.160403  |                       |              |
| H                          | 3.806859  | 1.132190  | -0.744937 |                       |              |
| H                          | 4.468295  | 1.314329  | 0.748816  |                       |              |
| H                          | 2.758340  | 0.363699  | 1.852629  |                       |              |
| C                          | 2.316216  | -1.127624 | 0.442621  |                       |              |
| O                          | 1.234156  | -1.632659 | 0.642053  |                       |              |
| O                          | 3.347130  | -1.810718 | -0.052400 |                       |              |
| H                          | 4.073258  | -1.137532 | -0.126322 |                       |              |
| H                          | 0.558044  | 0.919586  | 0.927672  |                       |              |
| H                          | 1.682168  | 2.273638  | 0.749862  |                       |              |
| S                          | 1.126012  | 1.399155  | -1.388970 |                       |              |
| H                          | 0.762833  | 0.113200  | -1.579021 |                       |              |
| C                          | -2.196310 | 0.223876  | 1.437980  |                       |              |
| C                          | -2.944002 | 0.482085  | 0.085396  |                       |              |
| O                          | -1.522125 | 1.196808  | 1.859707  |                       |              |
| O                          | -2.376656 | -0.895513 | 1.950537  |                       |              |
| H                          | -3.940011 | 0.850804  | 0.344022  |                       |              |
| C                          | -3.095931 | -0.739832 | -0.807913 |                       |              |
| N                          | -2.246392 | 1.618414  | -0.611664 |                       |              |
| H                          | -2.832064 | 2.090670  | -1.300736 |                       |              |
| H                          | -3.638494 | -0.493026 | -1.722015 |                       |              |
| H                          | -3.666377 | -1.482272 | -0.254291 |                       |              |
| S                          | -1.504365 | -1.489091 | -1.355375 |                       |              |
| H                          | -1.950535 | 2.274163  | 0.123964  |                       |              |
| H                          | -1.379930 | 1.308021  | -1.076239 |                       |              |
| H                          | -1.013222 | -1.721767 | -0.121818 |                       |              |
| 28                         |           |           |           |                       |              |
| Dimer 53 of the n...z type |           |           |           |                       |              |
| C                          | 2.328416  | -1.022648 | -0.626855 |                       |              |
| C                          | 3.162895  | -0.520360 | 0.561610  |                       |              |
| N                          | 2.225865  | -0.173895 | -1.811096 |                       |              |
| H                          | 1.977098  | 0.777799  | -1.547180 |                       |              |
| H                          | 3.090451  | -0.161580 | -2.338337 |                       |              |
| H                          | 2.782266  | -1.970915 | -0.942624 |                       |              |
| C                          | 0.910061  | -1.439610 | -0.206252 |                       |              |
| O                          | 0.623018  | -1.877406 | 0.883901  |                       |              |
| O                          | 0.015142  | -1.340304 | -1.196529 |                       |              |
| H                          | 0.513859  | -0.882814 | -1.922900 |                       |              |
| H                          | 3.022074  | -1.198484 | 1.403120  |                       |              |
| H                          | 4.217505  | -0.531306 | 0.283841  |                       |              |
| S                          | 2.835929  | 1.211531  | 1.096504  |                       |              |
| H                          | 1.476353  | 1.152012  | 1.180923  |                       |              |
| C                          | -0.802504 | 1.389635  | -0.043526 |                       |              |
| C                          | -2.317621 | 1.185620  | -0.378016 |                       |              |
| O                          | -0.075226 | 1.591178  | -1.044798 |                       |              |
| O                          | -0.485246 | 1.348894  | 1.162603  |                       |              |
| H                          | -2.727812 | 2.178130  | -0.578777 |                       |              |

| Nov 11, 22 15:56           |           |           |           | dimers_structures.xyz | Page 130/325 |
|----------------------------|-----------|-----------|-----------|-----------------------|--------------|
| C                          | -3.153377 | 0.514979  | 0.703062  |                       |              |
| N                          | -2.367846 | 0.435175  | -1.681954 |                       |              |
| H                          | -3.263354 | 0.514728  | -2.164898 |                       |              |
| H                          | -4.214834 | 0.554230  | 0.454181  |                       |              |
| H                          | -2.991357 | 1.063645  | 1.628451  |                       |              |
| S                          | -2.775629 | -1.267124 | 0.967421  |                       |              |
| H                          | -1.609741 | 0.811645  | -2.266243 |                       |              |
| H                          | -2.166930 | -0.558497 | -1.510778 |                       |              |
| H                          | -1.465244 | -1.112647 | 1.248208  |                       |              |
| 28                         |           |           |           |                       |              |
| Dimer 54 of the n...z type |           |           |           |                       |              |
| C                          | 2.663098  | -1.218696 | 0.153297  |                       |              |
| C                          | 3.384186  | -0.051341 | 0.839134  |                       |              |
| N                          | 2.961765  | -1.433278 | -1.263893 |                       |              |
| H                          | 3.174287  | -0.552991 | -1.727152 |                       |              |
| H                          | 3.745779  | -2.060463 | -1.394294 |                       |              |
| H                          | 2.922092  | -2.131401 | 0.701479  |                       |              |
| C                          | 1.140191  | -1.092180 | 0.311382  |                       |              |
| O                          | 0.612280  | -0.677032 | 1.326979  |                       |              |
| O                          | 0.449701  | -1.483158 | -0.744809 |                       |              |
| H                          | 1.146412  | -1.714492 | -1.417575 |                       |              |
| H                          | 3.092064  | 0.000837  | 1.886858  |                       |              |
| H                          | 4.461031  | -0.209124 | 0.780843  |                       |              |
| S                          | 3.078684  | 1.583908  | 0.041505  |                       |              |
| H                          | 1.757010  | 1.640478  | 0.311911  |                       |              |
| C                          | -2.992204 | -0.849132 | -0.271549 |                       |              |
| C                          | -2.906977 | 0.449649  | 0.602406  |                       |              |
| O                          | -2.881011 | -1.917626 | 0.375676  |                       |              |
| O                          | -3.199897 | -0.678176 | -1.489431 |                       |              |
| H                          | -3.908196 | 0.609583  | 1.012478  |                       |              |
| C                          | -2.497628 | 1.715964  | -0.134276 |                       |              |
| N                          | -2.017013 | 0.152271  | 1.777001  |                       |              |
| H                          | -2.022931 | 0.895002  | 2.476601  |                       |              |
| H                          | -2.531858 | 2.582697  | 0.528394  |                       |              |
| H                          | -3.214026 | 1.867520  | -0.938945 |                       |              |
| S                          | -0.796782 | 1.703215  | -0.838643 |                       |              |
| H                          | -2.344371 | -0.721094 | 2.199472  |                       |              |
| H                          | -1.033763 | -0.035015 | 1.485961  |                       |              |
| H                          | -0.933029 | 0.545771  | -1.516018 |                       |              |
| 28                         |           |           |           |                       |              |
| Dimer 55 of the n...z type |           |           |           |                       |              |
| C                          | -2.490413 | 0.060604  | 0.919555  |                       |              |
| C                          | -2.504836 | 1.525241  | 0.463526  |                       |              |
| N                          | -1.292463 | -0.382514 | 1.634395  |                       |              |
| H                          | -0.461614 | 0.175674  | 1.414684  |                       |              |
| H                          | -1.427269 | -0.356300 | 2.637162  |                       |              |
| H                          | -3.360603 | -0.080176 | 1.570608  |                       |              |
| C                          | -2.740935 | -0.891472 | -0.265916 |                       |              |
| O                          | -3.548088 | -0.675510 | -1.143632 |                       |              |
| O                          | -1.991807 | -1.991613 | -0.228479 |                       |              |
| H                          | -1.417349 | -1.860313 | 0.578096  |                       |              |
| H                          | -3.493621 | 1.796008  | 0.096712  |                       |              |
| H                          | -2.261115 | 2.163982  | 1.312391  |                       |              |
| S                          | -1.270150 | 1.935524  | -0.848711 |                       |              |
| H                          | -1.951363 | 1.365146  | -1.862912 |                       |              |
| C                          | 2.225167  | 1.013158  | 0.632736  |                       |              |
| C                          | 2.046556  | 0.363523  | -0.780765 |                       |              |
| O                          | 3.355855  | 1.513846  | 0.839965  |                       |              |
| O                          | 1.230235  | 0.990744  | 1.385269  |                       |              |
| H                          | 1.643208  | 1.141135  | -1.432568 |                       |              |
| C                          | 1.135255  | -0.851183 | -0.851095 |                       |              |
| N                          | 3.429634  | 0.045407  | -1.285411 |                       |              |
| H                          | 3.514840  | 0.081016  | -2.301141 |                       |              |
| H                          | 1.137873  | -1.277174 | -1.855980 |                       |              |
| H                          | 0.123965  | -0.527553 | -0.635539 |                       |              |
| S                          | 1.609438  | -2.223488 | 0.278929  |                       |              |
| H                          | 4.050459  | 0.738781  | -0.834606 |                       |              |
| H                          | 3.721651  | -0.882440 | -0.962261 |                       |              |
| H                          | 1.397815  | -1.529569 | 1.415754  |                       |              |

| Nov 11, 22 15:56           | dimers_structures.xyz | Page 131/325 |
|----------------------------|-----------------------|--------------|
| 28                         |                       |              |
| Dimer 56 of the n...z type |                       |              |
| C                          | -2.701773             | -0.585845    |
| C                          | -3.255053             | -1.439096    |
| N                          | -3.762010             | -0.148253    |
| H                          | -4.414683             | 0.439490     |
| H                          | -3.372553             | 0.438447     |
| H                          | -2.017649             | -1.234038    |
| C                          | -1.824131             | 0.559376     |
| O                          | -1.879483             | 1.697553     |
| O                          | -0.979274             | 0.153264     |
| H                          | -0.329203             | 0.884005     |
| H                          | -2.444627             | -1.902475    |
| H                          | -3.890958             | -2.220656    |
| S                          | -4.329150             | -0.509095    |
| H                          | -3.336411             | 0.202399     |
| C                          | 1.997716              | 1.595772     |
| C                          | 2.466630              | 0.165773     |
| O                          | 0.980529              | 1.663260     |
| O                          | 2.676297              | 2.523270     |
| H                          | 2.259734              | 0.036598     |
| C                          | 3.957430              | -0.028623    |
| N                          | 1.669161              | -0.892908    |
| H                          | 0.681909              | -0.888838    |
| H                          | 4.502013              | 0.754580     |
| H                          | 4.166003              | 0.064400     |
| S                          | 4.607186              | -1.684993    |
| H                          | 1.678213              | -0.721864    |
| H                          | 2.069832              | -1.820334    |
| H                          | 4.420265              | -1.541100    |
| 28                         |                       |              |
| Dimer 57 of the n...z type |                       |              |
| C                          | 2.059782              | 0.615127     |
| C                          | 3.202902              | -0.164846    |
| N                          | 2.433585              | 1.813570     |
| H                          | 3.367065              | 1.724017     |
| H                          | 2.406221              | 2.645649     |
| H                          | 1.364547              | 0.909665     |
| C                          | 1.223513              | -0.294300    |
| O                          | 0.887239              | -1.421391    |
| O                          | 0.851581              | 0.288502     |
| H                          | 1.248214              | 1.201597     |
| H                          | 2.803546              | -1.012497    |
| H                          | 3.731760              | 0.490774     |
| S                          | 4.480990              | -0.767023    |
| H                          | 3.701748              | -1.687582    |
| C                          | -3.280358             | -0.951734    |
| C                          | -2.980982             | -0.237522    |
| O                          | -2.524891             | -1.913805    |
| O                          | -4.224965             | -0.465510    |
| H                          | -3.834029             | -0.393573    |
| C                          | -2.768283             | 1.263405     |
| N                          | -1.786448             | -0.917682    |
| H                          | -2.025349             | -1.423914    |
| H                          | -2.493218             | 1.732248     |
| H                          | -3.705707             | 1.697486     |
| S                          | -1.434605             | 1.718137     |
| H                          | -1.470142             | -1.601622    |
| H                          | -1.003342             | -0.288546    |
| H                          | -2.041753             | 1.212174     |
| 28                         |                       |              |
| Dimer 58 of the n...z type |                       |              |
| C                          | -2.723676             | -0.395155    |
| C                          | -1.881898             | -1.534216    |
| N                          | -4.097645             | -0.442481    |
| H                          | -4.111806             | -0.286427    |
| H                          | -4.632130             | 0.316314     |
| H                          | -2.718551             | -0.552185    |
| C                          | -2.019783             | 0.943732     |

| Nov 11, 22 15:56           | dimers_structures.xyz | Page 132/325 |
|----------------------------|-----------------------|--------------|
| O                          | -2.482624             | 1.841214     |
| O                          | -0.818689             | 0.983296     |
| H                          | -0.277930             | 1.736252     |
| H                          | -0.898614             | -1.563272    |
| H                          | -2.386168             | -2.481158    |
| S                          | -1.682776             | -1.464384    |
| H                          | -0.927081             | -0.342450    |
| C                          | 1.224445              | 1.476483     |
| C                          | 2.402674              | 0.505714     |
| O                          | 1.044986              | 2.379515     |
| O                          | 0.533656              | 1.203524     |
| H                          | 2.941566              | 0.258772     |
| C                          | 1.821599              | -0.753639    |
| N                          | 3.362598              | 1.179499     |
| H                          | 4.010585              | 1.792589     |
| H                          | 1.143909              | -1.221798    |
| H                          | 1.252493              | -0.485532    |
| S                          | 3.076982              | -1.975722    |
| H                          | 2.806269              | 1.769707     |
| H                          | 3.909951              | 0.490639     |
| H                          | 3.566732              | -2.266793    |
| 28                         |                       |              |
| Dimer 59 of the n...z type |                       |              |
| C                          | -2.919807             | 0.314933     |
| C                          | -2.851079             | -1.166267    |
| N                          | -2.504956             | 1.272689     |
| H                          | -1.880979             | 0.843110     |
| H                          | -3.297567             | 1.655476     |
| H                          | -3.958544             | 0.526500     |
| C                          | -2.127471             | 0.577424     |
| O                          | -2.212118             | -0.123820    |
| O                          | -1.371555             | 1.674540     |
| H                          | -1.499188             | 2.031072     |
| H                          | -3.154760             | -1.785829    |
| H                          | -3.531564             | -1.347104    |
| S                          | -1.191316             | -1.720703    |
| H                          | -0.533881             | -1.617909    |
| C                          | 1.933234              | -1.143914    |
| C                          | 2.738696              | 0.192650     |
| O                          | 2.390302              | -2.031252    |
| O                          | 0.918762              | -1.172518    |
| H                          | 3.214397              | 0.252521     |
| C                          | 1.862481              | 1.424684     |
| N                          | 3.833871              | 0.098947     |
| H                          | 4.723110              | 0.494935     |
| H                          | 2.430541              | 2.342674     |
| H                          | 1.041264              | 1.383534     |
| S                          | 1.171838              | 1.563282     |
| H                          | 3.919555              | -0.912119    |
| H                          | 3.536703              | 0.558951     |
| H                          | 0.431056              | 0.431559     |
| 28                         |                       |              |
| Dimer 60 of the n...z type |                       |              |
| C                          | -2.722062             | -0.393016    |
| C                          | -1.879757             | -1.532744    |
| N                          | -4.096153             | -0.441792    |
| H                          | -4.110613             | -0.289788    |
| H                          | -4.630357             | 0.318721     |
| H                          | -2.716543             | -0.548156    |
| C                          | -2.018653             | 0.945663     |
| O                          | -2.480876             | 1.841108     |
| O                          | -0.818695             | 0.987452     |
| H                          | -0.277515             | 1.739496     |
| H                          | -0.895982             | -1.559279    |
| H                          | -2.382705             | -2.479727    |
| S                          | -1.683311             | -1.468826    |
| H                          | -0.934931             | -0.342389    |
| C                          | 1.223504              | 1.476246     |
| C                          | 2.401563              | 0.505116     |

| Nov 11, 22 15:56 dimers_structures.xyz Page 133/325 |           |           |           |
|-----------------------------------------------------|-----------|-----------|-----------|
| O                                                   | 1.045795  | 2.380512  | 0.044690  |
| O                                                   | 0.531144  | 1.202187  | -1.814069 |
| H                                                   | 2.939044  | 0.256908  | -1.445012 |
| C                                                   | 1.820594  | -0.752963 | 0.119909  |
| N                                                   | 3.363372  | 1.179280  | 0.407557  |
| H                                                   | 4.010659  | 1.791858  | -0.090010 |
| H                                                   | 1.140572  | -1.220616 | -0.589265 |
| H                                                   | 1.253838  | -0.483385 | 1.013158  |
| S                                                   | 3.075897  | -1.976065 | 0.679081  |
| H                                                   | 2.808477  | 1.770070  | 1.042594  |
| H                                                   | 3.911434  | 0.490574  | 0.935822  |
| H                                                   | 3.562630  | -2.268332 | -0.544583 |
| 28                                                  |           |           |           |
| Dimer 61 of the n...z type                          |           |           |           |
| C                                                   | -2.523393 | 0.813787  | -0.764203 |
| C                                                   | -3.473143 | 0.045559  | 0.166072  |
| N                                                   | -1.892057 | 0.092291  | -1.865021 |
| H                                                   | -1.412299 | -0.746853 | -1.536398 |
| H                                                   | -2.561881 | -0.157226 | -2.582340 |
| H                                                   | -3.120320 | 1.622847  | -1.205272 |
| C                                                   | -1.432810 | 1.574513  | 0.009620  |
| O                                                   | -1.573834 | 2.032089  | 1.118877  |
| O                                                   | -0.320221 | 1.774129  | -0.707545 |
| H                                                   | -0.456842 | 1.255255  | -1.539453 |
| H                                                   | -3.767273 | 0.701492  | 0.985616  |
| H                                                   | -4.368151 | -0.232276 | -0.391716 |
| S                                                   | -2.811026 | -1.536371 | 0.846599  |
| H                                                   | -1.533473 | -1.112495 | 1.075343  |
| C                                                   | 0.919158  | -1.107296 | 0.148053  |
| C                                                   | 2.469465  | -1.243080 | 0.281075  |
| O                                                   | 0.439375  | -1.480414 | -0.950349 |
| O                                                   | 0.329354  | -0.667088 | 1.153812  |
| H                                                   | 2.663642  | -2.181006 | 0.805899  |
| C                                                   | 3.135903  | -0.097297 | 1.032289  |
| N                                                   | 3.019504  | -1.395883 | -1.110463 |
| H                                                   | 3.857856  | -1.973797 | -1.162915 |
| H                                                   | 4.202815  | -0.282656 | 1.163501  |
| H                                                   | 2.666916  | -0.021853 | 2.010653  |
| S                                                   | 3.011229  | 1.522095  | 0.159134  |
| H                                                   | 2.249642  | -1.800192 | -1.669448 |
| H                                                   | 3.229877  | -0.469065 | -1.501069 |
| H                                                   | 1.661399  | 1.584802  | 0.142583  |
| 28                                                  |           |           |           |
| Dimer 62 of the n...z type                          |           |           |           |
| C                                                   | -2.917945 | -0.034507 | 0.627465  |
| C                                                   | -2.240407 | -1.388704 | 0.381849  |
| N                                                   | -3.912590 | 0.383111  | -0.364691 |
| H                                                   | -3.694579 | -0.006270 | -1.278758 |
| H                                                   | -4.847025 | 0.089974  | -0.107533 |
| H                                                   | -3.410022 | -0.091412 | 1.604565  |
| C                                                   | -1.881071 | 1.091486  | 0.799769  |
| O                                                   | -0.858048 | 0.967856  | 1.438206  |
| O                                                   | -2.232980 | 2.237606  | 0.225929  |
| H                                                   | -3.095021 | 2.028062  | -0.222818 |
| H                                                   | -1.499575 | -1.579809 | 1.156590  |
| H                                                   | -2.993106 | -2.176429 | 0.421651  |
| S                                                   | -1.454345 | -1.550861 | -1.277113 |
| H                                                   | -0.546776 | -0.544504 | -1.161581 |
| C                                                   | 1.815900  | 1.151453  | -0.814431 |
| C                                                   | 2.872194  | 0.003019  | -0.681683 |
| O                                                   | 2.147695  | 2.244532  | -0.297611 |
| O                                                   | 0.785781  | 0.861242  | -1.454834 |
| H                                                   | 3.398793  | -0.051869 | -1.636425 |
| C                                                   | 2.286189  | -1.364519 | -0.354442 |
| N                                                   | 3.874255  | 0.441063  | 0.351876  |
| H                                                   | 4.830903  | 0.151808  | 0.151923  |
| H                                                   | 3.060098  | -2.133366 | -0.368791 |
| H                                                   | 1.541302  | -1.607023 | -1.108448 |
| S                                                   | 1.528726  | -1.460381 | 1.322754  |

| Nov 11, 22 15:56 dimers_structures.xyz Page 134/325 |           |           |           |
|-----------------------------------------------------|-----------|-----------|-----------|
| H                                                   | 3.790125  | 1.473115  | 0.382308  |
| H                                                   | 3.599339  | 0.080265  | 1.273738  |
| H                                                   | 0.604906  | -0.488205 | 1.149620  |
| 28                                                  |           |           |           |
| Dimer 63 of the n...z type                          |           |           |           |
| C                                                   | -2.159150 | -1.037239 | -0.475822 |
| C                                                   | -3.029502 | -0.523196 | 0.684840  |
| N                                                   | -1.073934 | -1.863165 | 0.006832  |
| H                                                   | -0.543060 | -1.399480 | 0.737292  |
| H                                                   | -0.419962 | -2.119277 | -0.724843 |
| H                                                   | -2.816058 | -1.647556 | -1.108641 |
| C                                                   | -1.731595 | 0.127982  | -1.373416 |
| O                                                   | -0.590945 | 0.381345  | -1.704388 |
| O                                                   | -2.775882 | 0.856288  | -1.778889 |
| H                                                   | -2.467103 | 1.574908  | -2.354850 |
| H                                                   | -3.935436 | -0.052814 | 0.309610  |
| H                                                   | -3.305205 | -1.371365 | 1.310912  |
| S                                                   | -2.162937 | 0.658615  | 1.810756  |
| H                                                   | -2.182422 | 1.716341  | 0.973596  |
| C                                                   | 2.028325  | -1.652306 | 0.418124  |
| C                                                   | 2.372746  | -0.185458 | -0.009809 |
| O                                                   | 1.997591  | -2.489831 | -0.517084 |
| O                                                   | 1.823690  | -1.823460 | 1.635226  |
| H                                                   | 3.438805  | -0.030870 | 0.166178  |
| C                                                   | 1.552821  | 0.854519  | 0.741403  |
| N                                                   | 2.155848  | -0.074824 | -1.493213 |
| H                                                   | 2.484361  | -0.945697 | -1.922966 |
| H                                                   | 1.742170  | 0.740213  | 1.805202  |
| H                                                   | 0.488312  | 0.698799  | 0.575043  |
| S                                                   | 1.862952  | 2.596957  | 0.224353  |
| H                                                   | 1.143077  | 0.005028  | -1.687366 |
| H                                                   | 2.627500  | 0.734800  | -1.897389 |
| H                                                   | 3.133884  | 2.673196  | 0.670311  |
| 28                                                  |           |           |           |
| Dimer 64 of the n...z type                          |           |           |           |
| C                                                   | -2.950196 | 0.583949  | -0.137479 |
| C                                                   | -2.968142 | -0.464157 | 0.983135  |
| N                                                   | -3.137489 | 0.079738  | -1.501217 |
| H                                                   | -2.763813 | -0.861831 | -1.593486 |
| H                                                   | -4.114944 | 0.060578  | -1.764892 |
| H                                                   | -3.751176 | 1.301181  | 0.073710  |
| C                                                   | -1.665633 | 1.428282  | -0.093194 |
| O                                                   | -1.141038 | 1.809089  | 0.928423  |
| O                                                   | -1.177608 | 1.731053  | -1.298370 |
| H                                                   | -1.782657 | 1.262678  | -1.931584 |
| H                                                   | -2.786143 | 0.016660  | 1.943254  |
| H                                                   | -3.949414 | -0.938061 | 1.009451  |
| S                                                   | -1.754578 | -1.836233 | 0.754947  |
| H                                                   | -0.629573 | -1.161728 | 1.128155  |
| C                                                   | 1.940836  | 0.266843  | 1.292666  |
| C                                                   | 1.742295  | 0.785421  | -0.168062 |
| O                                                   | 2.908877  | 0.775007  | 1.906734  |
| O                                                   | 1.113079  | -0.575053 | 1.699800  |
| H                                                   | 1.049148  | 1.625104  | -0.111795 |
| C                                                   | 1.208233  | -0.236906 | -1.158914 |
| N                                                   | 3.068360  | 1.341206  | -0.615849 |
| H                                                   | 2.987547  | 2.096031  | -1.296836 |
| H                                                   | 1.136266  | 0.193900  | -2.158074 |
| H                                                   | 0.212245  | -0.537878 | -0.853164 |
| S                                                   | 2.263190  | -1.739745 | -1.318187 |
| H                                                   | 3.536407  | 1.666012  | 0.246405  |
| H                                                   | 3.647086  | 0.595052  | -1.016214 |
| H                                                   | 2.084272  | -2.150026 | -0.045243 |
| 28                                                  |           |           |           |
| Dimer 65 of the n...z type                          |           |           |           |
| C                                                   | -2.186439 | 0.005620  | -0.936027 |
| C                                                   | -1.577472 | -1.362126 | -0.603976 |
| N                                                   | -1.330265 | 1.180056  | -0.808997 |
| H                                                   | -0.762507 | 1.159939  | 0.037320  |

| Nov 11, 22 15:56           | dimers_structures.xyz |           | Page 135/325 |
|----------------------------|-----------------------|-----------|--------------|
| H -0.686863                | 1.286995              | -1.584691 |              |
| H -2.530111                | -0.048656             | -1.976362 |              |
| C -3.472978                | 0.254557              | -0.127598 |              |
| O -4.233712                | -0.619655             | 0.223184  |              |
| O -3.694067                | 1.544201              | 0.131435  |              |
| H -2.888330                | 2.004177              | -0.222891 |              |
| H -2.319633                | -2.145048             | -0.754442 |              |
| H -0.734037                | -1.553933             | -1.264359 |              |
| S -0.897961                | -1.510011             | 1.101064  |              |
| H -2.072112                | -1.376864             | 1.751035  |              |
| C 1.760237                 | 1.563757              | 0.100740  |              |
| C 2.899694                 | 0.616223              | 0.606973  |              |
| O 0.949083                 | 1.914388              | 0.996978  |              |
| O 1.776859                 | 1.868261              | -1.104836 |              |
| H 3.700437                 | 1.256133              | 0.984934  |              |
| C 3.470410                 | -0.333045             | -0.435133 |              |
| N 2.345403                 | -0.121013             | 1.796633  |              |
| H 3.056718                 | -0.421629             | 2.462797  |              |
| H 4.256958                 | -0.957120             | -0.008466 |              |
| H 3.896144                 | 0.263177              | -1.238979 |              |
| S 2.226010                 | -1.494258             | -1.143842 |              |
| H 1.674879                 | 0.530339              | 2.236036  |              |
| H 1.809108                 | -0.939689             | 1.489186  |              |
| H 1.498589                 | -0.530291             | -1.744090 |              |
| 28                         |                       |           |              |
| Dimer 66 of the n...z type |                       |           |              |
| C -2.860907                | -0.554102             | -0.563513 |              |
| C -3.344662                | -0.286537             | 0.875244  |              |
| N -1.895253                | -1.630494             | -0.606559 |              |
| H -1.104960                | -1.489768             | 0.018381  |              |
| H -1.520528                | -1.755046             | -1.540633 |              |
| C -3.749671                | -0.847659             | -1.132648 |              |
| H -2.385077                | 0.762925              | -1.176877 |              |
| O -1.221695                | 1.073822              | -1.351053 |              |
| O -3.402978                | 1.569941              | -1.485128 |              |
| H -3.059170                | 2.409913              | -1.831718 |              |
| H -4.178838                | 0.412938              | 0.873238  |              |
| H -3.679374                | -1.231725             | 1.302326  |              |
| S -2.050459                | 0.341216              | 2.037246  |              |
| H -2.040218                | 1.616857              | 1.598486  |              |
| C 1.686445                 | -1.777799             | -0.224173 |              |
| C 2.042981                 | -0.264997             | -0.379967 |              |
| O 0.829267                 | -2.044122             | 0.656315  |              |
| O 2.323847                 | -2.546918             | -0.966695 |              |
| H 2.052220                 | 0.004115              | -1.435114 |              |
| C 3.410537                 | -0.003788             | 0.249436  |              |
| N 0.982442                 | 0.553098              | 0.289843  |              |
| H 0.158487                 | 0.676096              | -0.327117 |              |
| H 4.143018                 | -0.635893             | -0.248164 |              |
| H 3.397416                 | -0.262356             | 1.310494  |              |
| S 3.955142                 | 1.757863              | 0.188080  |              |
| H 0.653451                 | 0.043176              | 1.119887  |              |
| H 1.328309                 | 1.480580              | 0.552506  |              |
| H 3.991181                 | 1.859266              | -1.156530 |              |
| 28                         |                       |           |              |
| Dimer 67 of the n...z type |                       |           |              |
| C -2.624264                | -0.514929             | 0.862606  |              |
| C -1.615825                | -1.213683             | -0.054985 |              |
| N -4.032763                | -0.881719             | 0.681845  |              |
| H -4.229433                | -1.085568             | -0.295081 |              |
| H -4.280003                | -1.696787             | 1.229730  |              |
| H -2.342867                | -0.752324             | 1.894985  |              |
| C -2.498494                | 1.015935              | 0.772722  |              |
| O -1.444198                | 1.597414              | 0.647420  |              |
| O -3.662698                | 1.657959              | 0.872306  |              |
| H -4.338556                | 0.933154              | 0.922549  |              |
| H -0.597327                | -0.934818             | 0.208342  |              |
| H -1.714501                | -2.292773             | 0.066286  |              |
| S -1.897754                | -0.890483             | -1.849594 |              |

| Nov 11, 22 15:56           | dimers_structures.xyz |           | Page 136/325 |
|----------------------------|-----------------------|-----------|--------------|
| H -1.432888                | 0.375807              | -1.839735 |              |
| C 2.634363                 | -1.080169             | 0.808630  |              |
| C 2.856771                 | 0.470145              | 0.836286  |              |
| O 3.671951                 | -1.761489             | 0.612406  |              |
| O 1.465052                 | -1.458344             | 1.006365  |              |
| H 2.944342                 | 0.763396              | 1.884635  |              |
| C 1.746639                 | 1.278080              | 0.181517  |              |
| N 4.195566                 | 0.732052              | 0.197802  |              |
| H 4.688967                 | 1.535739              | 0.584866  |              |
| H 1.950864                 | 2.348025              | 0.244080  |              |
| H 0.809176                 | 1.073364              | 0.690621  |              |
| S 1.535177                 | 0.915790              | -1.613120 |              |
| H 4.731745                 | -0.142942             | 0.332908  |              |
| H 4.082530                 | 0.866575              | -0.813011 |              |
| H 1.129848                 | -0.360011             | -1.450088 |              |
| 28                         |                       |           |              |
| Dimer 68 of the n...z type |                       |           |              |
| C 2.304607                 | -0.178075             | -0.838517 |              |
| C 1.295480                 | 0.952434              | -0.613971 |              |
| N 1.849604                 | -1.521606             | -0.472563 |              |
| H 1.243607                 | -1.477145             | 0.347496  |              |
| H 1.236198                 | -1.880015             | -1.198031 |              |
| H 2.549209                 | -0.182824             | -1.907787 |              |
| C 3.644900                 | 0.099980              | -0.143204 |              |
| O 4.141027                 | 1.200579              | -0.042238 |              |
| O 4.236128                 | -1.001780             | 0.320782  |              |
| H 3.576902                 | -1.722746             | 0.130166  |              |
| H 1.659836                 | 1.887711              | -1.036118 |              |
| H 0.370704                 | 0.666607              | -1.112448 |              |
| S 0.855129                 | 1.232561              | 1.156426  |              |
| H 2.007948                 | 1.850553              | 1.485680  |              |
| C -1.485655                | -1.366798             | -0.190251 |              |
| C -2.962719                | -0.953991             | 0.129545  |              |
| O -0.843142                | -1.790631             | 0.804003  |              |
| O -1.123143                | -1.259099             | -1.376214 |              |
| H -3.570213                | -1.854588             | 0.014223  |              |
| C -3.537203                | 0.148971              | -0.747464 |              |
| N -3.001527                | -0.593228             | 1.589808  |              |
| H -3.905044                | -0.756553             | 2.033797  |              |
| H -4.587180                | 0.329546              | -0.513528 |              |
| H -3.457873                | -0.170002             | -1.784146 |              |
| S -2.692135                | 1.774103              | -0.542393 |              |
| H -2.259992                | -1.164433             | 2.029403  |              |
| H -2.747512                | 0.394261              | 1.710146  |              |
| H -1.516081                | 1.375974              | -1.061280 |              |
| 28                         |                       |           |              |
| Dimer 69 of the n...z type |                       |           |              |
| C -2.930210                | -0.506307             | -0.535045 |              |
| C -2.412051                | 0.897679              | -0.897339 |              |
| N -4.112836                | -0.439941             | 0.306905  |              |
| H -3.874772                | -0.018709             | 1.200862  |              |
| H -4.445476                | -1.376984             | 0.511740  |              |
| H -3.198311                | -0.984897             | -1.483084 |              |
| C -1.780571                | -1.334307             | 0.054623  |              |
| O -1.748498                | -1.737547             | 1.196196  |              |
| O -0.802247                | -1.534079             | -0.835783 |              |
| H 0.020734                 | -1.979555             | -0.427710 |              |
| H -1.592393                | 0.823710              | -1.609873 |              |
| H -3.220917                | 1.464226              | -1.358746 |              |
| S -1.884754                | 1.927066              | 0.543453  |              |
| H -1.026784                | 1.039216              | 1.081848  |              |
| C 2.461265                 | -1.619340             | 0.216745  |              |
| C 2.481744                 | -0.184756             | -0.390680 |              |
| O 1.473628                 | -2.362651             | -0.064299 |              |
| O 3.423848                 | -1.877766             | 0.948612  |              |
| H 3.484547                 | 0.018289              | -0.763716 |              |
| C 2.110986                 | 0.836939              | 0.686528  |              |
| N 1.560763                 | -0.062119             | -1.578516 |              |
| H 1.879778                 | -0.647563             | -2.351720 |              |

| Nov 11, 22 15:56           |           |           |           | dimers_structures.xyz | Page 137/325 |
|----------------------------|-----------|-----------|-----------|-----------------------|--------------|
| H                          | 2.844471  | 0.759758  | 1.486415  |                       |              |
| H                          | 1.132305  | 0.617662  | 1.112571  |                       |              |
| S                          | 2.012200  | 2.577686  | 0.090499  |                       |              |
| H                          | 0.598995  | -0.356320 | -1.355456 |                       |              |
| H                          | 1.531152  | 0.912883  | -1.897983 |                       |              |
| H                          | 3.331223  | 2.723563  | -0.153909 |                       |              |
| 28                         |           |           |           |                       |              |
| Dimer 70 of the n...z type |           |           |           |                       |              |
| C                          | -2.904236 | -0.437791 | -0.746480 |                       |              |
| C                          | -1.475942 | 0.107140  | -0.645476 |                       |              |
| N                          | -3.842979 | 0.322699  | -1.573634 |                       |              |
| H                          | -3.664850 | 1.321449  | -1.503008 |                       |              |
| H                          | -3.780302 | 0.059760  | -2.549669 |                       |              |
| H                          | -2.832405 | -1.449168 | -1.162259 |                       |              |
| C                          | -3.521464 | -0.641035 | 0.649873  |                       |              |
| O                          | -2.884024 | -0.979693 | 1.621349  |                       |              |
| O                          | -4.837319 | -0.432422 | 0.689943  |                       |              |
| H                          | -5.066923 | -0.114926 | -0.220196 |                       |              |
| H                          | -0.857159 | -0.569270 | -0.057591 |                       |              |
| H                          | -1.053707 | 0.192639  | -1.647056 |                       |              |
| S                          | -1.379325 | 1.805717  | 0.077245  |                       |              |
| H                          | -1.783202 | 1.455393  | 1.316085  |                       |              |
| C                          | 1.852596  | -1.231576 | -0.326223 |                       |              |
| C                          | 2.019131  | 0.326064  | -0.288186 |                       |              |
| O                          | 1.177031  | -1.710191 | 0.622545  |                       |              |
| O                          | 2.378525  | -1.808107 | -1.292801 |                       |              |
| H                          | 1.274212  | 0.744672  | -0.966984 |                       |              |
| C                          | 3.395288  | 0.820667  | -0.709334 |                       |              |
| N                          | 1.642037  | 0.774147  | 1.095711  |                       |              |
| H                          | 1.033053  | 1.596261  | 1.092389  |                       |              |
| H                          | 3.443406  | 1.910216  | -0.688834 |                       |              |
| H                          | 3.578939  | 0.479115  | -1.725373 |                       |              |
| S                          | 4.758314  | 0.236429  | 0.386910  |                       |              |
| H                          | 1.132932  | -0.043052 | 1.488419  |                       |              |
| H                          | 2.469486  | 0.941266  | 1.674796  |                       |              |
| H                          | 4.587770  | -1.075402 | 0.121226  |                       |              |
| 28                         |           |           |           |                       |              |
| Dimer 71 of the n...z type |           |           |           |                       |              |
| C                          | 2.840186  | 0.399966  | -0.548965 |                       |              |
| C                          | 2.478063  | 1.736883  | 0.110182  |                       |              |
| N                          | 2.120055  | -0.018509 | -1.745622 |                       |              |
| H                          | 1.105016  | -0.010719 | -1.620395 |                       |              |
| H                          | 2.359700  | 0.557753  | -2.543279 |                       |              |
| H                          | 3.899336  | 0.491377  | -0.827361 |                       |              |
| C                          | 2.856244  | -0.771094 | 0.448414  |                       |              |
| O                          | 3.008838  | -0.650701 | 1.643013  |                       |              |
| O                          | 2.793942  | -1.965521 | -0.145103 |                       |              |
| H                          | 2.558425  | -1.765385 | -1.082885 |                       |              |
| H                          | 3.090167  | 1.864383  | 1.003094  |                       |              |
| H                          | 2.705291  | 2.547094  | -0.583754 |                       |              |
| S                          | 0.704356  | 1.968600  | 0.556686  |                       |              |
| H                          | 0.471944  | 0.708996  | 0.982844  |                       |              |
| C                          | -1.011525 | -1.016429 | -0.505858 |                       |              |
| C                          | -2.492116 | -1.302784 | -0.097333 |                       |              |
| O                          | -0.151197 | -1.267923 | 0.375148  |                       |              |
| O                          | -0.843604 | -0.569334 | -1.655498 |                       |              |
| H                          | -2.764472 | -2.276685 | -0.508669 |                       |              |
| C                          | -3.478888 | -0.252368 | -0.589074 |                       |              |
| N                          | -2.512846 | -1.437865 | 1.401624  |                       |              |
| H                          | -3.202988 | -2.104164 | 1.747294  |                       |              |
| H                          | -4.498387 | -0.496585 | -0.287412 |                       |              |
| H                          | -3.429445 | -0.226202 | -1.675052 |                       |              |
| S                          | -3.141499 | 1.434480  | 0.079047  |                       |              |
| H                          | -1.551170 | -1.722843 | 1.658501  |                       |              |
| H                          | -2.684019 | -0.524415 | 1.837089  |                       |              |
| H                          | -1.923308 | 1.564820  | -0.489849 |                       |              |
| 28                         |           |           |           |                       |              |
| Dimer 72 of the n...z type |           |           |           |                       |              |
| C                          | 2.571009  | 0.828010  | -0.229060 |                       |              |

| Nov 11, 22 15:56           |           |           |           | dimers_structures.xyz | Page 138/325 |
|----------------------------|-----------|-----------|-----------|-----------------------|--------------|
| C                          | 3.049665  | -0.164209 | 0.842524  |                       |              |
| N                          | 1.692380  | 1.905812  | 0.201624  |                       |              |
| H                          | 0.970264  | 1.607084  | 0.858729  |                       |              |
| H                          | 2.210653  | 2.672049  | 0.612101  |                       |              |
| H                          | 3.471176  | 1.279171  | -0.663696 |                       |              |
| C                          | 1.921659  | 0.079091  | -1.404262 |                       |              |
| O                          | 2.332634  | -0.976131 | -1.833968 |                       |              |
| O                          | 0.855729  | 0.683772  | -1.931770 |                       |              |
| H                          | 0.674019  | 1.482849  | -1.376129 |                       |              |
| H                          | 3.751071  | -0.874555 | 0.406426  |                       |              |
| H                          | 3.555592  | 0.385870  | 1.636421  |                       |              |
| S                          | 1.696494  | -1.094596 | 1.680321  |                       |              |
| H                          | 1.283731  | -1.787170 | 0.598129  |                       |              |
| C                          | -1.670286 | 1.289621  | 0.501907  |                       |              |
| C                          | -2.728391 | 0.160581  | 0.701524  |                       |              |
| O                          | -1.593638 | 1.755833  | -0.664451 |                       |              |
| O                          | -0.989568 | 1.556748  | 1.508110  |                       |              |
| H                          | -3.302892 | 0.355142  | 1.605381  |                       |              |
| C                          | -2.039954 | -1.200893 | 0.826505  |                       |              |
| N                          | -3.663536 | 0.214064  | -0.481803 |                       |              |
| H                          | -4.533018 | 0.700118  | -0.263744 |                       |              |
| H                          | -2.745522 | -1.966457 | 1.151785  |                       |              |
| H                          | -1.257944 | -1.099800 | 1.578274  |                       |              |
| S                          | -1.323515 | -1.846774 | -0.746854 |                       |              |
| H                          | -3.137741 | 0.774815  | -1.183042 |                       |              |
| H                          | -3.884964 | -0.703465 | -0.872808 |                       |              |
| H                          | -0.687461 | -0.717829 | -1.120228 |                       |              |
| 28                         |           |           |           |                       |              |
| Dimer 73 of the n...z type |           |           |           |                       |              |
| C                          | -2.598997 | 0.452281  | 0.825003  |                       |              |
| C                          | -3.385784 | 0.048396  | -0.438606 |                       |              |
| N                          | -1.867848 | 1.686216  | 0.611597  |                       |              |
| H                          | -1.197229 | 1.594117  | -0.144190 |                       |              |
| H                          | -1.349952 | 1.955743  | 1.441227  |                       |              |
| H                          | -3.340782 | 0.612020  | 1.612771  |                       |              |
| C                          | -1.733894 | -0.728192 | 1.262879  |                       |              |
| O                          | -0.554426 | -0.858369 | 0.992362  |                       |              |
| O                          | -2.425864 | -1.636900 | 1.950438  |                       |              |
| H                          | -1.852753 | -2.393161 | 2.160745  |                       |              |
| H                          | -4.012639 | -0.819833 | -0.240736 |                       |              |
| H                          | -4.024698 | 0.885595  | -0.718628 |                       |              |
| S                          | -2.348969 | -0.291977 | -1.931027 |                       |              |
| H                          | -1.979116 | -1.543700 | -1.591966 |                       |              |
| C                          | 2.960909  | -1.344108 | -0.110911 |                       |              |
| C                          | 2.353959  | 0.036987  | -0.538703 |                       |              |
| O                          | 2.447927  | -2.348154 | -0.662520 |                       |              |
| O                          | 3.904832  | -1.282308 | 0.700425  |                       |              |
| H                          | 3.022321  | 0.465140  | -1.288198 |                       |              |
| C                          | 2.179693  | 0.997638  | 0.629345  |                       |              |
| N                          | 1.040997  | -0.219124 | -1.222040 |                       |              |
| H                          | 1.139293  | -1.081418 | -1.769354 |                       |              |
| H                          | 3.147046  | 1.143732  | 1.102227  |                       |              |
| H                          | 1.494294  | 0.579059  | 1.367865  |                       |              |
| S                          | 1.450203  | 2.628627  | 0.163133  |                       |              |
| H                          | 0.309125  | -0.397859 | -0.512610 |                       |              |
| H                          | 0.736827  | 0.553254  | -1.815044 |                       |              |
| H                          | 2.441397  | 3.019110  | -0.664367 |                       |              |
| 28                         |           |           |           |                       |              |
| Dimer 74 of the n...z type |           |           |           |                       |              |
| C                          | -2.923768 | 0.115952  | 0.121071  |                       |              |
| C                          | -2.200930 | 0.589616  | -1.159924 |                       |              |
| N                          | -3.559071 | 1.212681  | 0.837249  |                       |              |
| H                          | -2.858184 | 1.804407  | 1.273518  |                       |              |
| H                          | -4.133332 | 0.845310  | 1.589826  |                       |              |
| H                          | -3.697826 | -0.578340 | -0.214792 |                       |              |
| C                          | -1.894983 | -0.682616 | 0.924336  |                       |              |
| O                          | -1.146585 | -0.162171 | 1.732909  |                       |              |
| O                          | -1.844308 | -1.958657 | 0.563012  |                       |              |
| H                          | -0.912842 | -2.315953 | 0.692385  |                       |              |

| Nov 11, 22 15:56           | dimers_structures.xyz |           | Page 139/325 |
|----------------------------|-----------------------|-----------|--------------|
| H                          | -1.704769             | -0.255838 | -1.635791    |
| H                          | -2.933069             | 1.021584  | -1.841396    |
| S                          | -0.930259             | 1.929564  | -0.907827    |
| H                          | -0.611835             | 1.636353  | 0.369505     |
| C                          | 0.897080              | -1.720528 | -0.609151    |
| C                          | 2.073252              | -0.707872 | -0.503003    |
| O                          | 0.233454              | -1.688997 | -1.661392    |
| O                          | 0.722699              | -2.450366 | 0.404705     |
| H                          | 3.008893              | -1.237816 | -0.690373    |
| C                          | 2.121125              | -0.024995 | 0.861108     |
| N                          | 1.918820              | 0.299152  | -1.610344    |
| H                          | 1.846029              | -0.180867 | -2.509053    |
| H                          | 2.274503              | -0.792967 | 1.614640     |
| H                          | 1.171681              | 0.459840  | 1.084980     |
| S                          | 3.409369              | 1.283814  | 1.017777     |
| H                          | 1.036653              | 0.836206  | -1.491394    |
| H                          | 2.700108              | 0.959523  | -1.626752    |
| H                          | 4.477257              | 0.465871  | 0.916653     |
| 28                         |                       |           |              |
| Dimer 75 of the n...z type |                       |           |              |
| C                          | -2.496352             | 0.438707  | -0.671660    |
| C                          | -1.747839             | -0.894599 | -0.775984    |
| N                          | -1.796533             | 1.531075  | 0.007422     |
| H                          | -1.275663             | 1.174056  | 0.806921     |
| H                          | -1.087256             | 1.920393  | -0.606477    |
| H                          | -2.711350             | 0.766150  | -1.696221    |
| C                          | -3.880650             | 0.262133  | -0.028731    |
| O                          | -4.573020             | -0.721328 | -0.170118    |
| O                          | -4.270852             | 1.318565  | 0.686532     |
| H                          | -3.488570             | 1.930147  | 0.661131     |
| H                          | -2.330003             | -1.614859 | -1.348789    |
| H                          | -0.800792             | -0.721057 | -1.284700    |
| S                          | -1.323251             | -1.640971 | 0.857916     |
| H                          | -2.570040             | -2.059513 | 1.154960     |
| C                          | 1.320135              | 0.670750  | -0.206410    |
| C                          | 2.121030              | -0.672113 | -0.266860    |
| O                          | 0.933772              | 1.105636  | -1.322330    |
| O                          | 1.116690              | 1.130573  | 0.930195     |
| H                          | 1.404665              | -1.481450 | -0.110718    |
| C                          | 3.233192              | -0.788547 | 0.765087     |
| N                          | 2.637666              | -0.818190 | -1.672975    |
| H                          | 2.722944              | -1.786645 | -1.981475    |
| H                          | 3.743211              | -1.749620 | 0.688595     |
| H                          | 2.785910              | -0.704720 | 1.752663     |
| S                          | 4.543002              | 0.495973  | 0.575157     |
| H                          | 1.971011              | -0.295660 | -2.265678    |
| H                          | 3.550701              | -0.358016 | -1.761376    |
| H                          | 3.734720              | 1.543430  | 0.839374     |
| 28                         |                       |           |              |
| Dimer 76 of the n...z type |                       |           |              |
| C                          | 1.697373              | 0.327328  | -0.036228    |
| C                          | 2.147690              | -0.681327 | 1.025761     |
| N                          | 1.111155              | -0.220534 | -1.257662    |
| H                          | 1.571591              | -1.090396 | -1.513964    |
| H                          | 0.109949              | -0.405211 | -1.180475    |
| H                          | 0.956687              | 0.975658  | 0.442918     |
| C                          | 2.840417              | 1.284036  | -0.418188    |
| O                          | 3.669753              | 1.693071  | 0.364436     |
| O                          | 2.814890              | 1.650387  | -1.699069    |
| H                          | 2.066120              | 1.116246  | -2.080911    |
| H                          | 2.520893              | -0.159856 | 1.905856     |
| H                          | 1.300163              | -1.299106 | 1.320684     |
| S                          | 3.437030              | -1.861388 | 0.434872     |
| H                          | 4.429745              | -0.953490 | 0.336350     |
| C                          | -2.874158             | -0.776010 | -0.964277    |
| C                          | -3.132739             | 0.660966  | -0.397863    |
| O                          | -3.872077             | -1.531063 | -0.971933    |
| O                          | -1.711764             | -0.998937 | -1.363126    |
| H                          | -3.382370             | 1.299914  | -1.247604    |

| Nov 11, 22 15:56           | dimers_structures.xyz |           | Page 140/325 |
|----------------------------|-----------------------|-----------|--------------|
| C                          | -1.959120             | 1.267479  | 0.356833     |
| N                          | -4.366146             | 0.582185  | 0.460882     |
| H                          | -4.895247             | 1.453526  | 0.500395     |
| H                          | -2.208595             | 2.255256  | 0.746645     |
| H                          | -1.132132             | 1.377971  | -0.340999    |
| S                          | -1.430607             | 0.273753  | 1.818188     |
| H                          | -4.937340             | -0.180268 | 0.061802     |
| H                          | -4.113649             | 0.306801  | 1.416364     |
| H                          | -1.132172             | -0.839798 | 1.117392     |
| 28                         |                       |           |              |
| Dimer 77 of the n...z type |                       |           |              |
| C                          | -2.792729             | 0.708930  | -0.409772    |
| C                          | -3.322147             | -0.727764 | -0.501394    |
| N                          | -1.838999             | 1.127466  | -1.429176    |
| H                          | -1.162078             | 0.404184  | -1.664032    |
| H                          | -2.302592             | 1.422295  | -2.279212    |
| H                          | -3.665835             | 1.368449  | -0.478958    |
| C                          | -2.208361             | 1.000996  | 0.982744     |
| O                          | -2.662991             | 0.542490  | 2.007364     |
| O                          | -1.156127             | 1.819310  | 0.976971     |
| H                          | -0.959511             | 2.009397  | 0.025384     |
| H                          | -4.145207             | -0.876349 | 0.195883     |
| H                          | -3.683441             | -0.910524 | -1.513097    |
| S                          | -2.073364             | -2.049589 | -0.171330    |
| H                          | -2.036815             | -1.876443 | 1.165960     |
| C                          | 1.301963              | 0.710855  | -0.799566    |
| C                          | 1.482678              | -0.078154 | 0.530779     |
| O                          | 0.991690              | 0.025412  | -1.804201    |
| O                          | 1.474099              | 1.941115  | -0.701409    |
| H                          | 0.714195              | 0.253924  | 1.230265     |
| C                          | 2.856727              | 0.132601  | 1.156918     |
| N                          | 1.227326              | -1.534980 | 0.261774     |
| H                          | 1.316665              | -2.107922 | 1.102443     |
| H                          | 2.955594              | -0.422069 | 2.091597     |
| H                          | 2.968226              | 1.193735  | 1.369241     |
| S                          | 4.258058              | -0.430321 | 0.095230     |
| H                          | 0.275928              | -1.652731 | -0.122624    |
| H                          | 1.886389              | -1.874463 | -0.444391    |
| H                          | 4.082919              | 0.488262  | -0.877116    |
| 28                         |                       |           |              |
| Dimer 78 of the n...z type |                       |           |              |
| C                          | -2.052628             | -0.461315 | -0.560204    |
| C                          | -3.330886             | 0.214986  | -1.063850    |
| N                          | -2.209861             | -1.797788 | 0.021926     |
| H                          | -3.118895             | -1.900859 | 0.465491     |
| H                          | -2.111291             | -2.523600 | -0.677014    |
| H                          | -1.353277             | -0.537826 | -1.396141    |
| C                          | -1.308871             | 0.431462  | 0.443608     |
| O                          | -1.212772             | 1.634426  | 0.334347     |
| O                          | -0.756020             | -0.239560 | 1.454132     |
| H                          | -1.023768             | -1.181911 | 1.287432     |
| H                          | -3.092757             | 1.180211  | -1.508330    |
| H                          | -3.800049             | -0.414391 | -1.820299    |
| S                          | -4.616059             | 0.458410  | 0.240884     |
| H                          | -3.930510             | 1.378806  | 0.949491     |
| C                          | 1.829453              | -1.169835 | -0.538363    |
| C                          | 2.280592              | -0.398217 | 0.747059     |
| O                          | 2.402509              | -2.273707 | -0.716880    |
| O                          | 0.944585              | -0.619757 | -1.220051    |
| H                          | 1.617792              | -0.711967 | 1.553881     |
| C                          | 2.234524              | 1.117231  | 0.636165     |
| N                          | 3.659455              | -0.894890 | 1.094760     |
| H                          | 3.875338              | -0.847749 | 2.090430     |
| H                          | 2.565807              | 1.587433  | 1.563309     |
| H                          | 1.207966              | 1.415135  | 0.443399     |
| S                          | 3.326095              | 1.791292  | -0.690098    |
| H                          | 3.694675              | -1.869616 | 0.753896     |
| H                          | 4.366305              | -0.361708 | 0.576774     |
| H                          | 2.651951              | 1.215708  | -1.707393    |

| Nov 11, 22 15:56           | dimers_structures.xyz         | Page 141/325 |
|----------------------------|-------------------------------|--------------|
| 28                         |                               |              |
| Dimer 79 of the n...z type |                               |              |
| C                          | -3.679766 -0.883103 0.107981  |              |
| C                          | -2.183138 -0.917091 0.434867  |              |
| N                          | -4.058827 -1.200025 -1.269753 |              |
| H                          | -3.375177 -0.840521 -1.931121 |              |
| H                          | -4.142898 -2.198790 -1.415080 |              |
| H                          | -4.169236 -1.609896 0.766184  |              |
| C                          | -4.304594 0.469141 0.499645   |              |
| O                          | -3.947165 1.119744 1.455522   |              |
| O                          | -5.300557 0.852014 -0.298742  |              |
| H                          | -5.328502 0.165357 -1.011970  |              |
| H                          | -2.024627 -0.727307 1.495189  |              |
| H                          | -1.777267 -1.896852 0.184180  |              |
| S                          | -1.185797 0.293823 -0.541552  |              |
| H                          | -1.655890 1.400734 0.069361   |              |
| C                          | 3.636666 -1.311381 0.079947   |              |
| C                          | 2.375383 -0.432499 -0.214216  |              |
| O                          | 3.595850 -1.951283 1.159357   |              |
| O                          | 4.520134 -1.294560 -0.798790  |              |
| H                          | 1.692510 -1.038450 -0.815326  |              |
| C                          | 2.657892 0.868074 -0.952984   |              |
| N                          | 1.671233 -0.172971 1.085619   |              |
| H                          | 0.673486 0.029965 0.926037    |              |
| H                          | 1.735223 1.422343 -1.131958   |              |
| H                          | 3.115444 0.626074 -1.909039   |              |
| S                          | 3.764693 2.012654 -0.021424   |              |
| H                          | 1.805301 -1.005150 1.674442   |              |
| H                          | 2.105334 0.620626 1.568312    |              |
| H                          | 4.836366 1.193038 -0.042870   |              |
| 28                         |                               |              |
| Dimer 80 of the n...z type |                               |              |
| C                          | 2.977636 -0.912979 0.266443   |              |
| C                          | 3.369109 0.519244 0.651954    |              |
| N                          | 3.141891 -1.266085 -1.147230  |              |
| H                          | 3.016414 -0.451117 -1.742893  |              |
| H                          | 4.054541 -1.662244 -1.335149  |              |
| C                          | 3.585118 -1.598351 0.866732   |              |
| C                          | 1.523639 -1.201558 0.677409   |              |
| O                          | 1.026217 -0.842598 1.716399   |              |
| O                          | 0.839557 -1.894086 -0.247132  |              |
| H                          | 1.502588 -2.027878 -0.980670  |              |
| H                          | 3.233218 0.670524 1.721636    |              |
| H                          | 4.417751 0.682546 0.403776    |              |
| S                          | 2.424236 1.816192 -0.261774   |              |
| H                          | 1.252380 1.683257 0.399185    |              |
| C                          | -2.027684 1.543474 0.246398   |              |
| C                          | -2.262962 0.650832 -1.018792  |              |
| O                          | -0.857371 1.981212 0.379750   |              |
| O                          | -3.030667 1.746707 0.954218   |              |
| H                          | -2.601277 1.318442 -1.815020  |              |
| C                          | -3.292923 -0.454815 -0.831622 |              |
| N                          | -0.933272 0.103224 -1.460372  |              |
| H                          | -0.910773 -0.148873 -2.448875 |              |
| H                          | -3.406839 -1.045249 -1.742272 |              |
| H                          | -4.246869 0.012308 -0.598457  |              |
| S                          | -2.866648 -1.655632 0.500812  |              |
| H                          | -0.225267 0.825274 -1.269359  |              |
| H                          | -0.664813 -0.726425 -0.910747 |              |
| H                          | -2.930680 -0.756201 1.504105  |              |
| 28                         |                               |              |
| Dimer 81 of the n...z type |                               |              |
| C                          | 2.596276 -0.554154 0.663166   |              |
| C                          | 1.705107 0.614742 1.095057    |              |
| N                          | 4.043330 -0.339051 0.754108   |              |
| H                          | 4.278375 0.625418 0.531992    |              |
| H                          | 4.392573 -0.542357 1.682757   |              |
| H                          | 2.342356 -1.408512 1.301211   |              |
| C                          | 2.261575 -1.029347 -0.762003  |              |

| Nov 11, 22 15:56           | dimers_structures.xyz         | Page 142/325 |
|----------------------------|-------------------------------|--------------|
| O                          | 1.143050 -1.024248 -1.227377  |              |
| O                          | 3.316800 -1.473989 -1.441139  |              |
| H                          | 4.087044 -1.302191 -0.839715  |              |
| H                          | 0.654691 0.330141 1.109680    |              |
| H                          | 1.982609 0.915797 2.105826    |              |
| S                          | 1.910586 2.133695 0.067872    |              |
| H                          | 1.432086 1.606914 -1.077702   |              |
| C                          | -2.158416 -0.502374 1.387443  |              |
| C                          | -1.743899 -0.824903 -0.083823 |              |
| O                          | -2.995260 -1.292144 1.893012  |              |
| O                          | -1.590212 0.481945 1.897941   |              |
| H                          | -0.806713 -1.380719 -0.048981 |              |
| C                          | -1.541275 0.398845 -0.963057  |              |
| N                          | -2.785118 -1.753413 -0.648759 |              |
| H                          | -2.419826 -2.409053 -1.338819 |              |
| H                          | -1.208632 0.113030 -1.960653  |              |
| H                          | -0.775467 1.019343 -0.510173  |              |
| S                          | -3.070103 1.406225 -1.186353  |              |
| H                          | -3.180623 -2.248078 0.168338  |              |
| H                          | -3.545859 -1.212481 -1.075068 |              |
| H                          | -3.184888 1.756414 0.111710   |              |
| 28                         |                               |              |
| Dimer 82 of the n...z type |                               |              |
| C                          | 3.094642 -0.414453 0.687453   |              |
| C                          | 2.409218 0.910871 1.043042    |              |
| N                          | 4.245108 -0.331105 -0.215403  |              |
| H                          | 4.143778 0.448189 -0.861152   |              |
| H                          | 5.113492 -0.212412 0.291658   |              |
| H                          | 3.428000 -0.871456 1.625612   |              |
| C                          | 2.080029 -1.419256 0.112173   |              |
| O                          | 0.951292 -1.542599 0.533507   |              |
| O                          | 2.562322 -2.165797 -0.878629  |              |
| H                          | 3.482473 -1.820338 -1.019360  |              |
| H                          | 1.577544 0.727712 1.722293    |              |
| H                          | 3.125312 1.564210 1.541846    |              |
| S                          | 1.815220 1.865853 -0.417977   |              |
| H                          | 0.892041 0.979791 -0.849891   |              |
| C                          | -1.699083 1.138435 -0.656884  |              |
| C                          | -1.660386 0.215368 0.602707   |              |
| O                          | -2.177107 2.284063 -0.472170  |              |
| O                          | -1.218777 0.639008 -1.693879  |              |
| H                          | -0.638425 0.220130 0.982175   |              |
| C                          | -2.064058 -1.225264 0.326061  |              |
| N                          | -2.533125 0.853861 1.649799   |              |
| H                          | -2.200010 0.717847 2.603524   |              |
| H                          | -1.996060 -1.831413 1.230098  |              |
| H                          | -1.375257 -1.627598 -0.409814 |              |
| S                          | -3.800828 -1.399786 -0.272681 |              |
| H                          | -2.562004 1.857707 1.400293   |              |
| H                          | -3.492175 0.497006 1.576536   |              |
| H                          | -3.616865 -0.717335 -1.421993 |              |
| 28                         |                               |              |
| Dimer 83 of the n...z type |                               |              |
| C                          | 3.066077 -0.479212 -0.795801  |              |
| C                          | 1.704201 0.216234 -0.730847   |              |
| N                          | 3.168969 -1.779587 -0.128489  |              |
| H                          | 2.610797 -1.798521 0.721539   |              |
| H                          | 2.852105 -2.532177 -0.727712  |              |
| H                          | 3.301565 -0.627736 -1.855824  |              |
| C                          | 4.190663 0.436370 -0.279471   |              |
| O                          | 4.202409 1.636678 -0.434870   |              |
| O                          | 5.176200 -0.217135 0.336837   |              |
| H                          | 4.873086 -1.159960 0.360907   |              |
| H                          | 1.724636 1.146172 -1.296835   |              |
| H                          | 0.927173 -0.432286 -1.132577  |              |
| S                          | 1.149279 0.586985 0.990591    |              |
| H                          | 1.980532 1.626689 1.206468    |              |
| C                          | -1.925941 -1.028909 0.216203  |              |
| C                          | -2.472319 0.307621 0.806806   |              |



| Nov 11, 22 15:56           |           | dimers_structures.xyz |           | Page 143/325 |
|----------------------------|-----------|-----------------------|-----------|--------------|
| O                          | -1.290403 | -0.934953             | -0.860470 |              |
| O                          | -2.222686 | -2.042070             | 0.879548  |              |
| H                          | -2.131970 | 0.404469              | 1.838358  |              |
| C                          | -3.997858 | 0.353433              | 0.777938  |              |
| N                          | -1.879098 | 1.460673              | 0.045144  |              |
| H                          | -2.269578 | 2.362098              | 0.324374  |              |
| H                          | -4.373397 | 1.275534              | 1.225038  |              |
| H                          | -4.367039 | -0.488765             | 1.360133  |              |
| S                          | -4.729633 | 0.302469              | -0.915372 |              |
| H                          | -0.857506 | 1.469244              | 0.209819  |              |
| H                          | -2.028746 | 1.318300              | -0.957774 |              |
| H                          | -4.298199 | -0.935333             | -1.233349 |              |
| 28                         |           |                       |           |              |
| Dimer 84 of the n...z type |           |                       |           |              |
| C                          | 2.625353  | 0.611240              | 0.616434  |              |
| C                          | 2.077079  | -0.614357             | 1.356446  |              |
| N                          | 1.656405  | 1.448585              | -0.086817 |              |
| H                          | 0.900071  | 0.912991              | -0.508606 |              |
| H                          | 1.233322  | 2.137852              | 0.522141  |              |
| H                          | 3.133422  | 1.235214              | 1.361137  |              |
| C                          | 3.739505  | 0.211712              | -0.369219 |              |
| O                          | 4.533488  | -0.679095             | -0.163135 |              |
| O                          | 3.767892  | 0.960386              | -1.471128 |              |
| H                          | 2.979013  | 1.557291              | -1.377887 |              |
| H                          | 2.878709  | -1.118742             | 1.893970  |              |
| H                          | 1.325427  | -0.292442             | 2.078101  |              |
| S                          | 1.233862  | -1.837771             | 0.262117  |              |
| H                          | 2.345288  | -2.247417             | -0.381874 |              |
| C                          | -1.788714 | 1.379062              | 0.064161  |              |
| C                          | -1.943535 | -0.052694             | 0.677966  |              |
| O                          | -2.276968 | 2.308974              | 0.749626  |              |
| O                          | -1.173137 | 1.428469              | -1.018295 |              |
| H                          | -1.016262 | -0.273993             | 1.208386  |              |
| C                          | -2.214437 | -1.143860             | -0.348003 |              |
| N                          | -3.026570 | 0.020984              | 1.719504  |              |
| H                          | -2.898089 | -0.629170             | 2.494868  |              |
| H                          | -2.284987 | -2.123259             | 0.126800  |              |
| H                          | -1.386937 | -1.155695             | -1.051445 |              |
| S                          | -3.797118 | -0.904235             | -1.263282 |              |
| H                          | -3.025906 | 1.000962              | 2.048166  |              |
| H                          | -3.940340 | -0.154170             | 1.285889  |              |
| H                          | -3.421198 | 0.239200              | -1.873068 |              |
| 28                         |           |                       |           |              |
| Dimer 85 of the n...z type |           |                       |           |              |
| C                          | 2.970638  | -0.735102             | -0.361732 |              |
| C                          | 1.614948  | -0.025661             | -0.430174 |              |
| N                          | 3.197007  | -1.601625             | 0.796784  |              |
| H                          | 2.764967  | -1.213326             | 1.631621  |              |
| H                          | 2.818270  | -2.529305             | 0.649262  |              |
| H                          | 3.058406  | -1.350978             | -1.264032 |              |
| C                          | 4.131894  | 0.270098              | -0.468038 |              |
| O                          | 4.090647  | 1.272195              | -1.145501 |              |
| O                          | 5.209012  | -0.076476             | 0.237017  |              |
| H                          | 4.936637  | -0.896131             | 0.722037  |              |
| H                          | 1.541526  | 0.551098              | -1.351343 |              |
| H                          | 0.813424  | -0.764109             | -0.417176 |              |
| S                          | 1.297216  | 1.101805              | 0.998853  |              |
| H                          | 2.136308  | 2.081339              | 0.606545  |              |
| C                          | -2.121855 | -1.276406             | -0.199844 |              |
| C                          | -2.177795 | 0.150359              | 0.445095  |              |
| O                          | -1.382836 | -1.362658             | -1.215527 |              |
| O                          | -2.784789 | -2.156731             | 0.373922  |              |
| H                          | -1.460074 | 0.154873              | 1.267629  |              |
| C                          | -3.545678 | 0.545712              | 0.982127  |              |
| N                          | -1.664676 | 1.118733              | -0.584688 |              |
| H                          | -1.041519 | 1.828392              | -0.193285 |              |
| H                          | -3.517022 | 1.534147              | 1.442616  |              |
| H                          | -3.836238 | -0.184475             | 1.733784  |              |
| S                          | -4.849947 | 0.634308              | -0.319120 |              |

Nov 11, 22 15:56

dimers\_structures.xyz

Page 144/325

|                            |           |           |           |
|----------------------------|-----------|-----------|-----------|
| H                          | -1.151789 | 0.516416  | -1.257808 |
| H                          | -2.437862 | 1.563672  | -1.088419 |
| H                          | -4.796845 | -0.673821 | -0.645723 |
| 28                         |           |           |           |
| Dimer 86 of the n...z type |           |           |           |
| C                          | -1.494804 | -0.460968 | -0.182754 |
| C                          | -1.446711 | 0.725425  | 0.784131  |
| N                          | -1.175280 | -0.181245 | -1.585598 |
| H                          | -1.497978 | 0.746780  | -1.849760 |
| H                          | -0.176544 | -0.220251 | -1.753286 |
| H                          | -0.770347 | -1.189533 | 0.195345  |
| C                          | -2.851978 | -1.178943 | -0.120029 |
| O                          | -3.498096 | -1.314893 | 0.895521  |
| O                          | -3.250810 | -1.674927 | -1.293278 |
| H                          | -2.557342 | -1.366593 | -1.933215 |
| H                          | -1.693084 | 0.390692  | 1.789721  |
| H                          | -0.441276 | 1.141669  | 0.808578  |
| S                          | -2.565226 | 2.117673  | 0.318599  |
| H                          | -3.723197 | 1.464798  | 0.548001  |
| C                          | 1.844405  | -0.155551 | 1.430100  |
| C                          | 3.052527  | -0.611167 | 0.543393  |
| O                          | 1.022720  | -1.065066 | 1.706792  |
| O                          | 1.840507  | 1.042551  | 1.765927  |
| H                          | 3.871480  | -0.862113 | 1.220903  |
| C                          | 3.536293  | 0.427771  | -0.457251 |
| N                          | 2.642295  | -1.895609 | -0.126548 |
| H                          | 3.415461  | -2.538539 | -0.296504 |
| H                          | 4.350642  | 0.036948  | -1.068862 |
| H                          | 3.898691  | 1.289997  | 0.097290  |
| S                          | 2.234801  | 0.987311  | -1.639099 |
| H                          | 1.938955  | -2.312794 | 0.508540  |
| H                          | 2.172220  | -1.705682 | -1.016745 |
| H                          | 1.483014  | 1.611113  | -0.709449 |
| 28                         |           |           |           |
| Dimer 87 of the n...z type |           |           |           |
| C                          | 1.991216  | -0.545396 | 0.502252  |
| C                          | 0.940642  | 0.506874  | 0.148648  |
| N                          | 2.619045  | -0.426650 | 1.821637  |
| H                          | 2.727638  | 0.550449  | 2.082863  |
| H                          | 2.066728  | -0.883587 | 2.537191  |
| H                          | 1.472245  | -1.508984 | 0.448724  |
| C                          | 3.089807  | -0.621193 | -0.567102 |
| O                          | 2.890794  | -0.460965 | -1.750979 |
| O                          | 4.298171  | -0.910902 | -0.078375 |
| H                          | 4.166263  | -0.932163 | 0.903832  |
| H                          | 0.504552  | 0.274398  | -0.820065 |
| H                          | 0.150768  | 0.479114  | 0.896052  |
| S                          | 1.553942  | 2.244611  | 0.140887  |
| H                          | 2.324880  | 2.123767  | -0.959118 |
| C                          | -1.618431 | -1.373502 | -0.585805 |
| C                          | -3.031839 | -0.998088 | -0.023892 |
| O                          | -0.873801 | -1.983497 | 0.223091  |
| O                          | -1.397647 | -1.037135 | -1.762555 |
| H                          | -3.719928 | -1.785803 | -0.338187 |
| C                          | -3.565488 | 0.347949  | -0.494356 |
| N                          | -2.941314 | -1.075877 | 1.477148  |
| H                          | -3.800330 | -1.388327 | 1.929038  |
| H                          | -4.553255 | 0.545884  | -0.075945 |
| H                          | -3.643546 | 0.321121  | -1.578524 |
| S                          | -2.510449 | 1.779805  | -0.001205 |
| H                          | -2.159115 | -1.730917 | 1.659220  |
| H                          | -2.675475 | -0.165438 | 1.866425  |
| H                          | -1.477011 | 1.467669  | -0.805841 |
| 28                         |           |           |           |
| Dimer 88 of the n...z type |           |           |           |
| C                          | 2.846561  | -0.077427 | -0.853510 |
| C                          | 2.884425  | 1.362373  | -0.325684 |
| N                          | 1.876665  | -0.410408 | -1.887634 |
| H                          | 0.923533  | -0.222311 | -1.579240 |

| Nov 11, 22 15:56 dimers_structures.xyz Page 145/325 |           |           |           |
|-----------------------------------------------------|-----------|-----------|-----------|
| H                                                   | 2.067841  | 0.077941  | -2.753885 |
| H                                                   | 3.845134  | -0.263476 | -1.271581 |
| C                                                   | 2.735347  | -1.105751 | 0.283032  |
| O                                                   | 3.091493  | -0.893614 | 1.420484  |
| O                                                   | 2.261958  | -2.291667 | -0.101128 |
| H                                                   | 1.937165  | -2.162518 | -1.021413 |
| H                                                   | 3.710894  | 1.473917  | 0.375412  |
| H                                                   | 3.042416  | 2.044963  | -1.161169 |
| S                                                   | 1.352286  | 1.965714  | 0.498896  |
| H                                                   | 1.275217  | 0.998049  | 1.435743  |
| C                                                   | -1.042387 | -0.510892 | 0.622798  |
| C                                                   | -1.931744 | 0.763568  | 0.522110  |
| O                                                   | -0.578090 | -0.937194 | -0.463172 |
| O                                                   | -0.929024 | -0.978397 | 1.770458  |
| H                                                   | -1.633741 | 1.472819  | 1.294430  |
| C                                                   | -3.411838 | 0.430314  | 0.697527  |
| N                                                   | -1.672628 | 1.424687  | -0.803464 |
| H                                                   | -2.261245 | 2.244162  | -0.962126 |
| H                                                   | -4.022890 | 1.334264  | 0.671969  |
| H                                                   | -3.532303 | -0.038297 | 1.672998  |
| S                                                   | -4.116696 | -0.663336 | -0.610894 |
| H                                                   | -0.681807 | 1.708252  | -0.828910 |
| H                                                   | -1.822202 | 0.744606  | -1.555184 |
| H                                                   | -3.317122 | -1.724275 | -0.377830 |
| 28                                                  |           |           |           |
| Dimer 89 of the n...z type                          |           |           |           |
| C                                                   | -2.271249 | -0.799866 | 0.212814  |
| C                                                   | -3.747742 | -0.385273 | 0.068819  |
| N                                                   | -1.776609 | -0.548081 | 1.550938  |
| H                                                   | -1.739274 | 0.449043  | 1.739689  |
| H                                                   | -0.844119 | -0.932246 | 1.662458  |
| C                                                   | -2.228051 | -1.877779 | 0.021348  |
| H                                                   | -1.439796 | -0.153022 | -0.897675 |
| O                                                   | -0.478256 | 0.569274  | -0.719358 |
| O                                                   | -1.892878 | -0.462569 | -2.114372 |
| H                                                   | -1.339371 | -0.032922 | -2.787332 |
| H                                                   | -4.141366 | -0.690318 | -0.898812 |
| H                                                   | -4.319030 | -0.878029 | 0.854752  |
| S                                                   | -4.054180 | 1.420679  | 0.300545  |
| H                                                   | -3.560961 | 1.822303  | -0.889106 |
| C                                                   | 3.696556  | 1.064009  | -0.138190 |
| C                                                   | 2.725122  | 0.036851  | 0.545521  |
| O                                                   | 3.414890  | 2.275328  | 0.053239  |
| O                                                   | 4.641484  | 0.563099  | -0.772927 |
| H                                                   | 3.271654  | -0.435206 | 1.361932  |
| C                                                   | 2.235248  | -1.017039 | -0.437491 |
| N                                                   | 1.595975  | 0.826330  | 1.155014  |
| H                                                   | 1.411125  | 0.575570  | 2.123815  |
| H                                                   | 3.104734  | -1.509614 | -0.865375 |
| H                                                   | 1.668004  | -0.556144 | -1.246876 |
| S                                                   | 1.098352  | -2.277361 | 0.285705  |
| H                                                   | 1.927793  | 1.809622  | 1.091712  |
| H                                                   | 0.719781  | 0.744542  | 0.609798  |
| H                                                   | 1.956038  | -2.764673 | 1.204889  |
| 28                                                  |           |           |           |
| Dimer 90 of the n...z type                          |           |           |           |
| C                                                   | -2.083033 | -0.778681 | 0.406154  |
| C                                                   | -3.158928 | -0.894048 | -0.677570 |
| N                                                   | -2.557478 | -0.683013 | 1.789232  |
| H                                                   | -3.440316 | -0.180598 | 1.839089  |
| H                                                   | -2.690186 | -1.598119 | 2.201834  |
| H                                                   | -1.426115 | -1.649771 | 0.329293  |
| C                                                   | -1.132782 | 0.391497  | 0.126746  |
| O                                                   | -0.771760 | 0.709626  | -0.988329 |
| O                                                   | -0.720526 | 1.032087  | 1.216091  |
| H                                                   | -1.189269 | 0.572401  | 1.958959  |
| H                                                   | -2.694599 | -1.008288 | -1.655957 |
| H                                                   | -3.779622 | -1.767861 | -0.478465 |
| S                                                   | -4.324757 | 0.537528  | -0.732884 |

| Nov 11, 22 15:56 dimers_structures.xyz Page 146/325 |           |           |           |
|-----------------------------------------------------|-----------|-----------|-----------|
| H                                                   | -3.421680 | 1.440946  | -1.165856 |
| C                                                   | 1.843222  | -1.438109 | -0.138775 |
| C                                                   | 3.034792  | -0.617016 | 0.453429  |
| O                                                   | 2.006899  | -1.867797 | -1.309107 |
| O                                                   | 0.884494  | -1.601281 | 0.636699  |
| H                                                   | 3.465760  | -1.219420 | 1.254143  |
| C                                                   | 2.630940  | 0.746717  | 1.019921  |
| N                                                   | 4.076737  | -0.489077 | -0.625173 |
| H                                                   | 5.034235  | -0.606991 | -0.297111 |
| H                                                   | 3.430874  | 1.160583  | 1.634846  |
| H                                                   | 1.741763  | 0.608297  | 1.631895  |
| S                                                   | 2.288611  | 2.029278  | -0.259525 |
| H                                                   | 3.819915  | -1.207531 | -1.326488 |
| H                                                   | 3.983507  | 0.427490  | -1.083608 |
| H                                                   | 1.111135  | 1.521370  | -0.694695 |
| 28                                                  |           |           |           |
| Dimer 91 of the n...z type                          |           |           |           |
| C                                                   | 2.971120  | 0.265614  | -0.186071 |
| C                                                   | 2.571287  | -0.927903 | -1.082678 |
| N                                                   | 3.585700  | -0.190553 | 1.049163  |
| H                                                   | 2.891020  | -0.655120 | 1.627929  |
| H                                                   | 3.933299  | 0.598905  | 1.584336  |
| H                                                   | 3.699997  | 0.849752  | -0.754625 |
| C                                                   | 1.743661  | 1.145505  | 0.023123  |
| O                                                   | 1.047316  | 1.098260  | 1.022700  |
| O                                                   | 1.474569  | 1.923995  | -1.021608 |
| H                                                   | 0.642774  | 2.425514  | -0.857212 |
| H                                                   | 2.155099  | -0.578102 | -2.026802 |
| H                                                   | 3.472616  | -1.503954 | -1.290831 |
| S                                                   | 1.395193  | -2.127930 | -0.312981 |
| H                                                   | 0.245057  | -1.505355 | -0.622027 |
| C                                                   | -2.553300 | -1.494473 | -0.099347 |
| C                                                   | -2.310408 | -0.055804 | 0.486830  |
| O                                                   | -1.887555 | -2.412052 | 0.447558  |
| O                                                   | -3.360288 | -1.553338 | -1.041174 |
| H                                                   | -3.253921 | 0.328839  | 0.868774  |
| C                                                   | -1.763369 | 0.857998  | -0.599445 |
| N                                                   | -1.357771 | -0.207643 | 1.647386  |
| H                                                   | -1.759765 | 0.099806  | 2.531116  |
| H                                                   | -2.456595 | 0.827710  | -1.435820 |
| H                                                   | -0.799750 | 0.494161  | -0.957482 |
| S                                                   | -1.548433 | 2.627810  | -0.079960 |
| H                                                   | -1.184018 | -1.235299 | 1.677384  |
| H                                                   | -0.458200 | 0.279168  | 1.511240  |
| H                                                   | -2.417573 | 3.162722  | -0.959039 |
| 28                                                  |           |           |           |
| Dimer 92 of the n...z type                          |           |           |           |
| C                                                   | 3.092931  | -0.072787 | 0.885543  |
| C                                                   | 2.240383  | 1.199443  | 0.961086  |
| N                                                   | 4.315302  | 0.003289  | 0.083049  |
| H                                                   | 4.193580  | 0.637191  | -0.703027 |
| H                                                   | 5.104422  | 0.324852  | 0.630170  |
| H                                                   | 3.374595  | -0.336033 | 1.911119  |
| C                                                   | 2.250767  | -1.268258 | 0.403326  |
| O                                                   | 1.094470  | -1.440325 | 0.718581  |
| O                                                   | 2.917573  | -2.118325 | -0.374491 |
| H                                                   | 3.809503  | -1.699480 | -0.489270 |
| H                                                   | 1.372604  | 1.024852  | 1.595849  |
| H                                                   | 2.830433  | 2.005937  | 1.396546  |
| S                                                   | 1.695732  | 1.832506  | -0.683847 |
| H                                                   | 0.965345  | 0.758193  | -1.064442 |
| C                                                   | -1.492263 | -0.654178 | -0.986642 |
| C                                                   | -1.621017 | 0.202289  | 0.318447  |
| O                                                   | -0.919349 | -0.058580 | -1.937472 |
| O                                                   | -1.933874 | -1.814285 | -0.935988 |
| H                                                   | -0.671745 | 0.087134  | 0.843165  |
| C                                                   | -2.762271 | -0.189955 | 1.243567  |
| N                                                   | -1.723024 | 1.646266  | -0.100282 |
| H                                                   | -1.344625 | 2.299596  | 0.585443  |

| Nov 11, 22 15:56 dimers_structures.xyz Page 147/325 |           |           |           |
|-----------------------------------------------------|-----------|-----------|-----------|
| H                                                   | -2.767695 | 0.423368  | 2.145950  |
| H                                                   | -2.625508 | -1.230782 | 1.527131  |
| S                                                   | -4.430687 | 0.016878  | 0.481779  |
| H                                                   | -1.202376 | 1.728067  | -0.985453 |
| H                                                   | -2.703878 | 1.886535  | -0.284421 |
| H                                                   | -4.232137 | -0.897595 | -0.490190 |
| 28                                                  |           |           |           |
| Dimer 93 of the n...z type                          |           |           |           |
| C                                                   | 2.261813  | 0.753172  | -0.455730 |
| C                                                   | 1.570997  | -0.431670 | -1.139402 |
| N                                                   | 3.710676  | 0.854197  | -0.668088 |
| H                                                   | 4.130609  | -0.061573 | -0.802218 |
| H                                                   | 3.934929  | 1.426061  | -1.472969 |
| H                                                   | 1.791850  | 1.666569  | -0.837036 |
| C                                                   | 1.984670  | 0.775866  | 1.057962  |
| O                                                   | 0.891380  | 0.574968  | 1.542800  |
| O                                                   | 3.048370  | 1.072669  | 1.798766  |
| H                                                   | 3.780741  | 1.185027  | 1.135941  |
| H                                                   | 0.500316  | -0.416411 | -0.961774 |
| H                                                   | 1.758437  | -0.377520 | -2.211752 |
| S                                                   | 2.166170  | -2.080961 | -0.557913 |
| H                                                   | 1.196820  | -2.232528 | 0.367777  |
| C                                                   | -2.123151 | -1.181661 | 0.538913  |
| C                                                   | -3.010796 | -0.379726 | -0.474547 |
| O                                                   | -2.506920 | -1.137870 | 1.735232  |
| O                                                   | -1.161916 | -1.788446 | 0.035139  |
| H                                                   | -3.587709 | -1.111159 | -1.042624 |
| C                                                   | -2.211525 | 0.486713  | -1.441759 |
| N                                                   | -3.986483 | 0.430744  | 0.335655  |
| H                                                   | -4.931720 | 0.447255  | -0.044300 |
| H                                                   | -2.859434 | 0.933005  | -2.197175 |
| H                                                   | -1.486924 | -0.153348 | -1.940891 |
| S                                                   | -1.357583 | 1.907397  | -0.632096 |
| H                                                   | -3.961100 | -0.011216 | 1.275663  |
| H                                                   | -3.646060 | 1.394115  | 0.438230  |
| H                                                   | -0.626847 | 1.187425  | 0.252194  |
| 28                                                  |           |           |           |
| Dimer 94 of the n...z type                          |           |           |           |
| C                                                   | 2.783555  | 0.346324  | 0.234341  |
| C                                                   | 2.799536  | -1.165533 | 0.475754  |
| N                                                   | 2.264120  | 1.185788  | 1.315222  |
| H                                                   | 1.465582  | 0.742083  | 1.763527  |
| H                                                   | 2.967386  | 1.361701  | 2.022672  |
| H                                                   | 3.819621  | 0.652637  | 0.046147  |
| C                                                   | 2.047036  | 0.708322  | -1.067402 |
| O                                                   | 1.995772  | -0.006430 | -2.040239 |
| O                                                   | 1.495101  | 1.926251  | -1.040571 |
| H                                                   | 1.649946  | 2.246056  | -0.115945 |
| H                                                   | 3.230236  | -1.674295 | -0.385573 |
| H                                                   | 3.409677  | -1.382844 | 1.352515  |
| S                                                   | 1.148058  | -1.902463 | 0.829253  |
| H                                                   | 0.586647  | -1.683726 | -0.381238 |
| C                                                   | -1.952009 | -0.516471 | -1.253343 |
| C                                                   | -2.799270 | -0.390805 | 0.060109  |
| O                                                   | -1.367838 | -1.621605 | -1.395977 |
| O                                                   | -1.975663 | 0.469085  | -2.009846 |
| H                                                   | -3.811538 | -0.724425 | -0.180129 |
| C                                                   | -2.860461 | 1.009543  | 0.650557  |
| N                                                   | -2.246586 | -1.382188 | 1.048572  |
| H                                                   | -2.918266 | -1.666804 | 1.761951  |
| H                                                   | -3.475432 | 1.031335  | 1.551421  |
| H                                                   | -3.302176 | 1.669982  | -0.091913 |
| S                                                   | -1.209459 | 1.667171  | 1.139807  |
| H                                                   | -1.934135 | -2.193682 | 0.496243  |
| H                                                   | -1.415196 | -0.991332 | 1.510877  |
| H                                                   | -0.701959 | 1.666091  | -0.109089 |
| 28                                                  |           |           |           |
| Dimer 95 of the n...z type                          |           |           |           |
| C                                                   | 3.379988  | 0.576547  | 0.396103  |

| Nov 11, 22 15:56 dimers_structures.xyz Page 148/325 |           |           |           |
|-----------------------------------------------------|-----------|-----------|-----------|
| C                                                   | 2.115847  | 1.171067  | 1.030839  |
| N                                                   | 3.872378  | 1.239539  | -0.814356 |
| H                                                   | 3.107211  | 1.656712  | -1.338434 |
| H                                                   | 4.543358  | 1.966711  | -0.599463 |
| H                                                   | 4.170785  | 0.612967  | 1.153209  |
| C                                                   | 3.195627  | -0.925836 | 0.109503  |
| O                                                   | 2.646664  | -1.687431 | 0.872764  |
| O                                                   | 3.727651  | -1.322947 | -1.046527 |
| H                                                   | 4.086161  | -0.489915 | -1.449565 |
| H                                                   | 1.822624  | 0.580089  | 1.897371  |
| H                                                   | 2.318514  | 2.192604  | 1.352641  |
| S                                                   | 0.684824  | 1.300579  | -0.127875 |
| H                                                   | 0.448838  | -0.026927 | -0.266560 |
| C                                                   | -1.999526 | -1.494616 | -0.414097 |
| C                                                   | -2.782335 | -0.819052 | 0.762792  |
| O                                                   | -0.794836 | -1.760030 | -0.170390 |
| O                                                   | -2.663089 | -1.713613 | -1.442951 |
| H                                                   | -3.271889 | -1.620210 | 1.321976  |
| C                                                   | -3.834002 | 0.190282  | 0.324293  |
| N                                                   | -1.776136 | -0.205098 | 1.700420  |
| H                                                   | -2.151414 | -0.023098 | 2.631877  |
| H                                                   | -4.345478 | 0.626614  | 1.183883  |
| H                                                   | -4.565026 | -0.334792 | -0.286094 |
| S                                                   | -3.155677 | 1.612426  | -0.632490 |
| H                                                   | -0.978972 | -0.850910 | 1.756270  |
| H                                                   | -1.404788 | 0.673519  | 1.310679  |
| H                                                   | -2.704683 | 0.869275  | -1.664144 |
| 28                                                  |           |           |           |
| Dimer 96 of the n...z type                          |           |           |           |
| C                                                   | 1.930793  | 0.255998  | -0.697018 |
| C                                                   | 3.416982  | 0.304723  | -1.086701 |
| N                                                   | 1.405707  | 1.488148  | -0.090405 |
| H                                                   | 2.082559  | 1.877172  | 0.565845  |
| H                                                   | 1.289732  | 2.193452  | -0.813627 |
| H                                                   | 1.346488  | 0.057763  | -1.596761 |
| C                                                   | 1.669439  | -0.965375 | 0.189144  |
| O                                                   | 2.005403  | -2.078408 | -0.133702 |
| O                                                   | 1.066711  | -0.748352 | 1.370423  |
| H                                                   | 0.911009  | 0.204467  | 1.471044  |
| H                                                   | 3.701812  | -0.619956 | -1.586177 |
| H                                                   | 3.581130  | 1.137566  | -1.770943 |
| S                                                   | 4.557062  | 0.603557  | 0.334481  |
| H                                                   | 4.405460  | -0.606364 | 0.911503  |
| C                                                   | -1.621945 | -0.938945 | -0.257033 |
| C                                                   | -2.025050 | 0.148743  | 0.786041  |
| O                                                   | -0.929402 | -0.541497 | -1.222543 |
| O                                                   | -2.053118 | -2.081597 | -0.004978 |
| H                                                   | -1.541853 | -0.088783 | 1.735011  |
| C                                                   | -3.534004 | 0.208845  | 1.004688  |
| N                                                   | -1.491533 | 1.482735  | 0.341618  |
| H                                                   | -1.723281 | 2.228436  | 0.999865  |
| H                                                   | -3.798984 | 0.978357  | 1.731663  |
| H                                                   | -3.857322 | -0.757223 | 1.385610  |
| S                                                   | -4.492768 | 0.612858  | -0.520419 |
| H                                                   | -0.450907 | 1.453272  | 0.219393  |
| H                                                   | -1.892027 | 1.717661  | -0.570712 |
| H                                                   | -4.198428 | -0.527369 | -1.178435 |
| 28                                                  |           |           |           |
| Dimer 97 of the n...z type                          |           |           |           |
| C                                                   | 2.418952  | 0.053346  | 1.145738  |
| C                                                   | 3.296039  | -0.515755 | 0.018814  |
| N                                                   | 1.469126  | -0.932775 | 1.621665  |
| H                                                   | 0.937262  | -1.360481 | 0.865881  |
| H                                                   | 0.804453  | -0.517708 | 2.265530  |
| H                                                   | 3.098679  | 0.318317  | 1.964698  |
| C                                                   | 1.790234  | 1.374273  | 0.690243  |
| O                                                   | 0.600822  | 1.589697  | 0.618476  |
| O                                                   | 2.725383  | 2.279016  | 0.362472  |
| H                                                   | 2.291948  | 3.097113  | 0.069677  |

| Nov 11, 22 15:56 dimers_structures.xyz Page 149/325 |           |           |           |
|-----------------------------------------------------|-----------|-----------|-----------|
| H                                                   | 4.155319  | 0.125367  | -0.164277 |
| H                                                   | 3.647607  | -1.503420 | 0.315473  |
| S                                                   | 2.408269  | -0.757804 | -1.588397 |
| H                                                   | 2.489684  | 0.523615  | -2.002363 |
| C                                                   | -1.649683 | -1.918427 | 0.286386  |
| C                                                   | -1.756921 | -0.376439 | 0.047325  |
| O                                                   | -0.603068 | -2.446945 | -0.166982 |
| O                                                   | -2.574505 | -2.435318 | 0.939945  |
| H                                                   | -1.272737 | 0.110180  | 0.894436  |
| C                                                   | -3.181229 | 0.132675  | -0.108153 |
| N                                                   | -0.922372 | -0.002615 | -1.146607 |
| H                                                   | 0.006583  | -0.450980 | -1.093590 |
| H                                                   | -3.753271 | -0.184144 | 0.759866  |
| H                                                   | -3.654602 | -0.293451 | -0.995239 |
| S                                                   | -3.303419 | 1.965204  | -0.311920 |
| H                                                   | -1.356899 | -0.318720 | -2.015400 |
| H                                                   | -0.791463 | 1.010506  | -1.196878 |
| H                                                   | -2.800854 | 2.283491  | 0.898450  |
| 28                                                  |           |           |           |
| Dimer 98 of the n...z type                          |           |           |           |
| C                                                   | 2.633944  | 0.555961  | 0.776957  |
| C                                                   | 1.155404  | 0.642711  | 0.385684  |
| N                                                   | 3.499364  | 1.632200  | 0.280793  |
| H                                                   | 3.202528  | 1.954910  | -0.636216 |
| H                                                   | 3.507220  | 2.427722  | 0.907332  |
| H                                                   | 2.681164  | 0.566938  | 1.871695  |
| C                                                   | 3.247825  | -0.800038 | 0.382930  |
| O                                                   | 2.673987  | -1.857638 | 0.505707  |
| O                                                   | 4.500513  | -0.713284 | -0.069810 |
| H                                                   | 4.697685  | 0.258305  | -0.064431 |
| H                                                   | 0.602696  | -0.209285 | 0.777519  |
| H                                                   | 0.730409  | 1.559892  | 0.792780  |
| S                                                   | 0.873188  | 0.673899  | -1.442519 |
| H                                                   | 0.466421  | -0.607801 | -1.542783 |
| C                                                   | -2.002082 | -1.300329 | -0.647004 |
| C                                                   | -3.076091 | -0.815349 | 0.383617  |
| O                                                   | -0.998688 | -1.869443 | -0.142946 |
| O                                                   | -2.267411 | -1.084204 | -1.840713 |
| H                                                   | -3.898109 | -1.532776 | 0.352710  |
| C                                                   | -3.617974 | 0.581119  | 0.101730  |
| N                                                   | -2.457411 | -0.909371 | 1.752445  |
| H                                                   | -3.110641 | -1.184615 | 2.484994  |
| H                                                   | -4.431044 | 0.833144  | 0.784067  |
| H                                                   | -3.995325 | 0.593225  | -0.918224 |
| S                                                   | -2.361418 | 1.915473  | 0.316610  |
| H                                                   | -1.689307 | -1.596577 | 1.651438  |
| H                                                   | -2.032734 | -0.008292 | 2.004271  |
| H                                                   | -1.498383 | 1.473335  | -0.629602 |
| 28                                                  |           |           |           |
| Dimer 99 of the n...z type                          |           |           |           |
| C                                                   | 3.336962  | -0.781115 | 0.441241  |
| C                                                   | 3.598938  | 0.680663  | 0.826512  |
| N                                                   | 3.779446  | -1.193525 | -0.893104 |
| H                                                   | 3.756382  | -0.409409 | -1.540507 |
| H                                                   | 4.720407  | -1.567106 | -0.879449 |
| H                                                   | 3.846055  | -1.407588 | 1.181654  |
| C                                                   | 1.846379  | -1.134128 | 0.608283  |
| O                                                   | 1.172311  | -0.757315 | 1.540513  |
| O                                                   | 1.369319  | -1.923468 | -0.352873 |
| H                                                   | 2.136047  | -2.041279 | -0.972621 |
| H                                                   | 3.194639  | 0.877199  | 1.818408  |
| H                                                   | 4.673079  | 0.866237  | 0.839306  |
| S                                                   | 2.906836  | 1.903716  | -0.368911 |
| H                                                   | 1.609169  | 1.548881  | -0.233049 |
| C                                                   | -3.627787 | 0.169563  | 0.862204  |
| C                                                   | -2.994531 | -0.790422 | -0.202665 |
| O                                                   | -4.751162 | 0.639366  | 0.548006  |
| O                                                   | -2.960659 | 0.338177  | 1.898769  |
| H                                                   | -3.238360 | -1.811240 | 0.099409  |

| Nov 11, 22 15:56 dimers_structures.xyz Page 150/325 |           |           |           |
|-----------------------------------------------------|-----------|-----------|-----------|
| C                                                   | -1.487410 | -0.662412 | -0.352311 |
| N                                                   | -3.713541 | -0.538849 | -1.502679 |
| H                                                   | -3.804323 | -1.365518 | -2.092536 |
| H                                                   | -1.095357 | -1.351103 | -1.100090 |
| H                                                   | -1.014822 | -0.891510 | 0.598054  |
| S                                                   | -0.949017 | 1.017022  | -0.886768 |
| H                                                   | -4.639830 | -0.167603 | -1.226378 |
| H                                                   | -3.235559 | 0.197868  | -2.032405 |
| H                                                   | -1.371167 | 1.650175  | 0.227210  |
| 28                                                  |           |           |           |
| Dimer 100 of the n...z type                         |           |           |           |
| C                                                   | -2.934226 | -0.803534 | -0.488932 |
| C                                                   | -3.128323 | -0.522520 | 1.008693  |
| N                                                   | -2.380902 | -2.127285 | -0.710712 |
| H                                                   | -1.531330 | -2.258149 | -0.170190 |
| H                                                   | -2.137578 | -2.260550 | -1.686814 |
| H                                                   | -3.931335 | -0.758729 | -0.944440 |
| C                                                   | -2.139627 | 0.322572  | -1.157808 |
| O                                                   | -1.138915 | 0.154931  | -1.825139 |
| O                                                   | -2.677437 | 1.523847  | -0.935148 |
| H                                                   | -2.129320 | 2.204922  | -1.358313 |
| H                                                   | -3.699926 | 0.390638  | 1.157988  |
| H                                                   | -3.670939 | -1.356107 | 1.453078  |
| S                                                   | -1.554108 | -0.380046 | 1.972667  |
| H                                                   | -1.235573 | 0.862082  | 1.551857  |
| C                                                   | 3.507443  | -0.867620 | -0.116615 |
| C                                                   | 2.242967  | 0.019764  | -0.404193 |
| O                                                   | 3.292196  | -2.106278 | -0.087779 |
| O                                                   | 4.577152  | -0.247441 | 0.019308  |
| H                                                   | 2.325232  | 0.366503  | -1.435405 |
| C                                                   | 2.139580  | 1.207290  | 0.539835  |
| N                                                   | 1.037900  | -0.877311 | -0.343786 |
| H                                                   | 0.344273  | -0.676180 | -1.076407 |
| H                                                   | 3.069484  | 1.766690  | 0.473959  |
| H                                                   | 2.021256  | 0.872542  | 1.573109  |
| S                                                   | 0.711174  | 2.334154  | 0.224212  |
| H                                                   | 1.428338  | -1.834011 | -0.424780 |
| H                                                   | 0.539996  | -0.816003 | 0.551934  |
| H                                                   | 0.944516  | 2.526603  | -1.089967 |
| 28                                                  |           |           |           |
| Dimer 101 of the n...z type                         |           |           |           |
| C                                                   | 1.702945  | -0.211906 | 0.565177  |
| C                                                   | 1.419062  | 0.836274  | -0.512955 |
| N                                                   | 2.212319  | 0.287556  | 1.845271  |
| H                                                   | 2.834084  | 1.079667  | 1.702262  |
| H                                                   | 1.462053  | 0.584988  | 2.457064  |
| H                                                   | 0.759922  | -0.739787 | 0.741185  |
| C                                                   | 2.645103  | -1.310663 | 0.050623  |
| O                                                   | 2.660775  | -1.708610 | -1.092575 |
| O                                                   | 3.438655  | -1.821547 | 0.995645  |
| H                                                   | 3.254675  | -1.268222 | 1.796643  |
| H                                                   | 0.948091  | 0.360558  | -1.369896 |
| H                                                   | 0.740085  | 1.585228  | -0.106344 |
| S                                                   | 2.907242  | 1.781382  | -1.058211 |
| H                                                   | 3.513217  | 0.751452  | -1.683336 |
| C                                                   | -2.210483 | -1.313954 | -0.409537 |
| C                                                   | -3.013069 | -0.035158 | -0.830705 |
| O                                                   | -2.902224 | -2.230350 | 0.098300  |
| O                                                   | -0.988145 | -1.276142 | -0.642926 |
| H                                                   | -3.232848 | -0.129746 | -1.895801 |
| C                                                   | -2.272258 | 1.272034  | -0.587893 |
| N                                                   | -4.331251 | -0.082873 | -0.105804 |
| H                                                   | -5.106714 | 0.323070  | -0.629007 |
| H                                                   | -2.863979 | 2.130549  | -0.908735 |
| H                                                   | -1.351713 | 1.245143  | -1.165347 |
| S                                                   | -1.878059 | 1.576011  | 1.188311  |
| H                                                   | -4.493052 | -1.087171 | 0.087387  |
| H                                                   | -4.254882 | 0.394470  | 0.798941  |
| H                                                   | -1.145065 | 0.457368  | 1.354651  |

| Nov 11, 22 15:56       | dimers_structures.xyz         | Page 151/325 |
|------------------------|-------------------------------|--------------|
| 28                     |                               |              |
| Dimer 102 of the n...z | type                          |              |
| C                      | 2.808502 -0.082661 1.007589   |              |
| C                      | 2.972719 -1.432220 0.301719   |              |
| N                      | 1.652661 0.044660 1.899509    |              |
| H                      | 0.887218 -0.545083 1.589763   |              |
| H                      | 1.881410 -0.222611 2.849158   |              |
| H                      | 3.714766 0.084985 1.599911    |              |
| C                      | 2.789848 1.077939 -0.004816   |              |
| O                      | 3.461928 1.099164 -1.010623   |              |
| O                      | 1.972985 2.074844 0.335994    |              |
| H                      | 1.531076 1.760311 1.165573    |              |
| H                      | 3.909361 -1.457606 -0.252176  |              |
| S                      | 2.980147 -2.230184 1.043739   |              |
| H                      | 1.605445 -1.850713 -0.869107  |              |
| H                      | 1.932774 -0.938011 -1.805908  |              |
| C                      | -3.129969 -0.532641 0.796491  |              |
| C                      | -1.729810 -0.596341 0.096221  |              |
| O                      | -3.990825 -1.318139 0.327526  |              |
| O                      | -3.216759 0.267586 1.745460   |              |
| H                      | -1.106703 -1.270604 0.687606  |              |
| C                      | -1.034282 0.749427 -0.045353  |              |
| N                      | -1.920856 -1.266197 -1.234786 |              |
| H                      | -1.104079 -1.800299 -1.532755 |              |
| H                      | -0.063405 0.638957 -0.526407  |              |
| H                      | -0.891290 1.163220 0.949382   |              |
| S                      | -1.964512 1.955732 -1.079792  |              |
| H                      | -2.750130 -1.872692 -1.120211 |              |
| H                      | -2.146708 -0.569470 -1.953150 |              |
| H                      | -3.030319 2.038232 -0.256420  |              |
| 28                     |                               |              |
| Dimer 103 of the n...z | type                          |              |
| C                      | -3.041141 -0.299208 -0.762752 |              |
| C                      | -2.133981 0.934792 -0.795876  |              |
| N                      | -4.447010 -0.072305 -0.418221 |              |
| H                      | -4.535317 0.679448 0.261171   |              |
| H                      | -4.997520 0.171684 -1.232571  |              |
| H                      | -3.007096 -0.753198 -1.759649 |              |
| C                      | -2.472882 -1.384397 0.169611  |              |
| O                      | -1.288638 -1.594969 0.311318  |              |
| O                      | -3.407669 -2.096845 0.796422  |              |
| H                      | -4.262264 -1.667203 0.534069  |              |
| H                      | -1.134395 0.663021 -1.128128  |              |
| H                      | -2.542589 1.663842 -1.496025  |              |
| S                      | -2.010514 1.820815 0.815688   |              |
| H                      | -1.383197 0.830207 1.480338   |              |
| C                      | 3.234094 -1.199934 -0.217510  |              |
| C                      | 2.679644 -0.188677 0.844717   |              |
| O                      | 4.488003 -1.241951 -0.298877  |              |
| O                      | 2.377303 -1.854585 -0.837864  |              |
| H                      | 2.505270 -0.751053 1.764591   |              |
| C                      | 1.395058 0.518379 0.439682    |              |
| N                      | 3.786561 0.790219 1.137004    |              |
| H                      | 3.770098 1.164043 2.085610    |              |
| H                      | 1.067698 1.212923 1.214000    |              |
| H                      | 0.621121 -0.230676 0.289000   |              |
| S                      | 1.571047 1.533147 -1.090781   |              |
| H                      | 4.661867 0.271728 0.950408    |              |
| H                      | 3.745858 1.569589 0.470960    |              |
| H                      | 1.841753 0.490542 -1.903438   |              |
| 28                     |                               |              |
| Dimer 104 of the n...z | type                          |              |
| C                      | 3.011413 -0.117512 -0.899655  |              |
| C                      | 1.584733 -0.665641 -0.783471  |              |
| N                      | 4.099597 -1.088992 -0.769084  |              |
| H                      | 3.873925 -1.803669 -0.081814  |              |
| H                      | 4.298025 -1.549991 -1.648787  |              |
| H                      | 3.097999 0.351289 -1.886449   |              |
| C                      | 3.248637 1.034726 0.094122    |              |

| Nov 11, 22 15:56       | dimers_structures.xyz         | Page 152/325 |
|------------------------|-------------------------------|--------------|
| O                      | 2.399505 1.838898 0.402398    |              |
| O                      | 4.494756 1.088756 0.567194    |              |
| H                      | 4.943328 0.293289 0.184604    |              |
| H                      | 0.863782 0.133047 -0.949659   |              |
| H                      | 1.433179 -1.445738 -1.529119  |              |
| S                      | 1.239871 -1.449077 0.855641   |              |
| H                      | 0.986036 -0.295283 1.507147   |              |
| C                      | -1.448589 0.853088 0.020609   |              |
| C                      | -2.058512 -0.460088 -0.561566 |              |
| O                      | -1.247202 0.868456 1.256749   |              |
| O                      | -1.250591 1.742536 -0.831615  |              |
| H                      | -1.422847 -0.818030 -1.372662 |              |
| C                      | -3.469873 -0.238822 -1.100742 |              |
| N                      | -2.041421 -1.521283 0.502604  |              |
| H                      | -2.487655 -2.389521 0.202883  |              |
| H                      | -3.872398 -1.153783 -1.539289 |              |
| H                      | -3.414281 0.521843 -1.877147  |              |
| S                      | -4.701184 0.268562 0.176252   |              |
| H                      | -1.056269 -1.715871 0.757427  |              |
| H                      | -2.510860 -1.168247 1.341305  |              |
| H                      | -4.136767 1.457159 0.473047   |              |
| 28                     |                               |              |
| Dimer 105 of the n...z | type                          |              |
| C                      | -2.942380 -0.341817 0.894715  |              |
| C                      | -2.144909 0.944086 1.143541   |              |
| N                      | -2.177773 -1.541112 0.554193  |              |
| H                      | -1.407195 -1.325617 -0.072283 |              |
| H                      | -1.798882 -1.995398 1.376235  |              |
| H                      | -3.503073 -0.554330 1.812309  |              |
| C                      | -4.028232 -0.124849 -0.175028 |              |
| O                      | -4.614248 0.921914 -0.333232  |              |
| O                      | -4.290799 -1.210711 -0.903235 |              |
| H                      | -3.635364 -1.885670 -0.596922 |              |
| H                      | -2.814041 1.752151 1.434408   |              |
| H                      | -1.430136 0.777496 1.949850   |              |
| S                      | -1.144830 1.493462 -0.304263  |              |
| H                      | -2.178807 1.829974 -1.099993  |              |
| C                      | 4.124618 0.008701 0.122412    |              |
| C                      | 2.724968 0.521443 0.611083    |              |
| O                      | 4.719221 0.780958 -0.670498   |              |
| O                      | 4.489772 -1.084439 0.591160   |              |
| H                      | 2.880262 1.027627 1.566022    |              |
| C                      | 1.686153 -0.576837 0.786434   |              |
| N                      | 2.274504 1.570925 -0.368958   |              |
| H                      | 1.681304 2.294514 0.037897    |              |
| H                      | 0.742483 -0.177316 1.155641   |              |
| H                      | 2.065871 -1.289857 1.513887   |              |
| S                      | 1.292622 -1.463879 -0.780978  |              |
| H                      | 3.146626 1.968802 -0.757568   |              |
| H                      | 1.767981 1.130338 -1.144911   |              |
| H                      | 2.488299 -2.080863 -0.879865  |              |
| 28                     |                               |              |
| Dimer 106 of the n...z | type                          |              |
| C                      | 2.272230 0.071064 0.957258    |              |
| C                      | 1.593236 -1.247470 0.572657   |              |
| N                      | 1.439658 1.275545 0.891323    |              |
| H                      | 0.712034 1.193372 0.185856    |              |
| H                      | 1.016754 1.492870 1.784573    |              |
| H                      | 2.632819 -0.039064 1.985816   |              |
| C                      | 3.548247 0.303670 0.125133    |              |
| O                      | 4.323779 -0.577755 -0.171260  |              |
| O                      | 3.736610 1.575131 -0.225965   |              |
| H                      | 2.930646 2.042817 0.118108    |              |
| H                      | 2.285106 -2.075579 0.720037   |              |
| H                      | 0.707106 -1.401378 1.186030   |              |
| S                      | 0.963991 -1.296725 -1.160389  |              |
| H                      | 2.170644 -1.216031 -1.759765  |              |
| C                      | -2.386522 -1.253459 0.191660  |              |
| C                      | -3.035327 0.090766 0.670945   |              |

| Nov 11, 22 15:56            | dimers_structures.xyz |           | Page 153/325 |
|-----------------------------|-----------------------|-----------|--------------|
| O -1.578199                 | -1.764539             | 1.009016  |              |
| O -2.764280                 | -1.669023             | -0.916218 |              |
| H -4.006663                 | -0.160616             | 1.101385  |              |
| C -3.228171                 | 1.126189              | -0.427602 |              |
| N -2.180510                 | 0.612198              | 1.793201  |              |
| H -2.701865                 | 1.085996              | 2.530004  |              |
| H -3.720341                 | 2.020997              | -0.044367 |              |
| H -3.850972                 | 0.684276              | -1.201740 |              |
| S -1.646199                 | 1.705886              | -1.179481 |              |
| H -1.688303                 | -0.227477             | 2.153090  |              |
| H -1.471602                 | 1.252757              | 1.422680  |              |
| H -1.260680                 | 0.501633              | -1.649984 |              |
| 28                          |                       |           |              |
| Dimer 107 of the n...z type |                       |           |              |
| C -2.017388                 | -0.548083             | 0.750010  |              |
| C -1.595092                 | 0.936187              | 0.710858  |              |
| N -1.009318                 | -1.430676             | 0.181232  |              |
| H -1.037150                 | -1.377648             | -0.833677 |              |
| H -1.217051                 | -2.394722             | 0.421835  |              |
| H -2.145683                 | -0.795539             | 1.807223  |              |
| C -3.386531                 | -0.681431             | 0.079453  |              |
| O -3.562544                 | -1.127392             | -1.031163 |              |
| O -4.369652                 | -0.190097             | 0.852507  |              |
| H -5.211146                 | -0.241028             | 0.370706  |              |
| H -2.383703                 | 1.553051              | 1.140293  |              |
| H -0.684513                 | 1.073563              | 1.295668  |              |
| S -1.170436                 | 1.595756              | -0.963309 |              |
| H -2.261033                 | 1.152908              | -1.622468 |              |
| C 2.034254                  | 1.610242              | 0.535797  |              |
| C 1.857954                  | 0.167537              | -0.020351 |              |
| O 2.591029                  | 2.429144              | -0.235808 |              |
| O 1.614007                  | 1.774532              | 1.699637  |              |
| H 0.877393                  | -0.223662             | 0.237195  |              |
| C 2.924494                  | -0.767381             | 0.534714  |              |
| N 1.923380                  | 0.228534              | -1.521100 |              |
| H 1.009269                  | 0.520827              | -1.884813 |              |
| H 2.879678                  | -0.723347             | 1.621457  |              |
| H 3.925597                  | -0.471543             | 0.215093  |              |
| S 2.705638                  | -2.515145             | -0.028853 |              |
| H 2.605580                  | 0.955898              | -1.773492 |              |
| H 2.172481                  | -0.674761             | -1.934499 |              |
| H 1.419745                  | -2.620711             | 0.368872  |              |
| 28                          |                       |           |              |
| Dimer 108 of the n...z type |                       |           |              |
| C 2.322320                  | 0.446627              | 1.001668  |              |
| C 2.849829                  | -0.810961             | 0.291931  |              |
| N 1.320497                  | 0.123978              | 2.000053  |              |
| H 0.654437                  | -0.583400             | 1.687940  |              |
| H 0.786731                  | 0.948088              | 2.255900  |              |
| H 3.190702                  | 0.899173              | 1.500571  |              |
| C 1.882690                  | 1.503499              | -0.016040 |              |
| O 0.817498                  | 2.077964              | -0.007637 |              |
| O 2.845100                  | 1.747370              | -0.922638 |              |
| H 2.539724                  | 2.435897              | -1.534989 |              |
| H 3.811486                  | -0.611336             | -0.174813 |              |
| H 2.980074                  | -1.599131             | 1.033237  |              |
| S 1.736488                  | -1.518094             | -1.009108 |              |
| H 2.108097                  | -0.670219             | -1.989613 |              |
| C -1.422228                 | -1.824054             | 0.416501  |              |
| C -1.481147                 | -0.371955             | -0.143333 |              |
| O -1.984915                 | -2.699230             | -0.281859 |              |
| O -0.846131                 | -1.936269             | 1.519219  |              |
| H -0.524263                 | 0.119743              | -0.015966 |              |
| C -2.569706                 | 0.425262              | 0.566269  |              |
| N -1.743064                 | -0.454226             | -1.619866 |              |
| H -0.870616                 | -0.623734             | -2.123586 |              |
| H -2.336516                 | 0.431994              | 1.629677  |              |
| H -3.550558                 | -0.034230             | 0.430194  |              |
| S -2.736624                 | 2.157618              | -0.049158 |              |

| Nov 11, 22 15:56            | dimers_structures.xyz |           | Page 154/325 |
|-----------------------------|-----------------------|-----------|--------------|
| H -2.350501                 | -1.271893             | -1.773642 |              |
| H -2.169757                 | 0.404163              | -1.983051 |              |
| H -1.451848                 | 2.505057              | 0.170425  |              |
| 28                          |                       |           |              |
| Dimer 109 of the n...z type |                       |           |              |
| C 2.834759                  | 0.735681              | 0.947841  |              |
| C 1.356980                  | 0.814717              | 0.536232  |              |
| N 3.531572                  | 1.981428              | 0.669413  |              |
| H 3.572986                  | 2.133202              | -0.335499 |              |
| H 4.495101                  | 1.917747              | 0.983031  |              |
| H 2.843573                  | 0.565704              | 2.031034  |              |
| C 3.510556                  | -0.494859             | 0.328705  |              |
| O 4.547359                  | -0.471613             | -0.290911 |              |
| O 2.808290                  | -1.618370             | 0.563661  |              |
| H 3.268990                  | -2.372218             | 0.161845  |              |
| H 0.807020                  | -0.049410             | 0.902341  |              |
| H 0.924875                  | 1.722591              | 0.955701  |              |
| S 1.109174                  | 0.932812              | -1.296485 |              |
| H 1.102201                  | -0.395406             | -1.534339 |              |
| C -1.233248                 | -1.451331             | -0.066679 |              |
| C -2.096730                 | -0.150609             | -0.007354 |              |
| O -1.012107                 | -1.911255             | -1.211661 |              |
| O -0.881225                 | -1.882884             | 1.048748  |              |
| H -1.609560                 | 0.577898              | 0.639161  |              |
| C -3.494489                 | -0.471182             | 0.513891  |              |
| N -2.161838                 | 0.455454              | -1.379207 |              |
| H -1.244539                 | 0.877077              | -1.596471 |              |
| H -3.393668                 | -0.926842             | 1.496756  |              |
| H -3.997101                 | -1.183203             | -0.144034 |              |
| S -4.621937                 | 0.986520              | 0.608875  |              |
| H -2.314224                 | -0.291452             | -2.064887 |              |
| H -2.896163                 | 1.166503              | -1.446995 |              |
| H -3.908929                 | 1.668780              | 1.528158  |              |
| 28                          |                       |           |              |
| Dimer 110 of the n...z type |                       |           |              |
| C -2.317567                 | -0.739629             | 0.210870  |              |
| C -3.383858                 | -0.712095             | -0.888902 |              |
| N -2.788504                 | -0.996166             | 1.573527  |              |
| H -3.717181                 | -0.607667             | 1.717738  |              |
| H -2.824376                 | -1.987579             | 1.776595  |              |
| H -1.594504                 | -1.519054             | -0.049123 |              |
| C -1.482232                 | 0.551503              | 0.206256  |              |
| O -1.148740                 | 1.127399              | -0.805484 |              |
| O -1.126731                 | 0.970548              | 1.420109  |              |
| H -1.561105                 | 0.327193              | 2.037629  |              |
| H -2.915148                 | -0.557284             | -1.859555 |              |
| H -3.914164                 | -1.664372             | -0.901871 |              |
| S -4.684364                 | 0.574443              | -0.639164 |              |
| H -3.881590                 | 1.636796              | -0.854160 |              |
| C 3.385903                  | 1.080233              | 0.157816  |              |
| C 3.165127                  | 0.008096              | -0.964363 |              |
| O 4.512286                  | 1.036079              | 0.714897  |              |
| O 2.436486                  | 1.860262              | 0.349319  |              |
| H 3.386858                  | 0.490293              | -1.918982 |              |
| C 1.761464                  | -0.577387             | -1.011699 |              |
| N 4.208773                  | -1.059051             | -0.764290 |              |
| H 4.507706                  | -1.513922             | -1.626591 |              |
| H 1.667021                  | -1.312267             | -1.812476 |              |
| H 1.055065                  | 0.229660              | -1.188733 |              |
| S 1.285316                  | -1.453382             | 0.540924  |              |
| H 4.996878                  | -0.580573             | -0.295020 |              |
| H 3.859760                  | -1.772414             | -0.115115 |              |
| H 1.223180                  | -0.339119             | 1.298397  |              |
| 28                          |                       |           |              |
| Dimer 111 of the n...z type |                       |           |              |
| C -2.955818                 | -0.443048             | -0.750455 |              |
| C -1.485200                 | -0.249779             | -0.355636 |              |
| N -3.262767                 | 0.214634              | -2.009611 |              |
| H -3.169824                 | 1.221521              | -1.902626 |              |

| Nov 11, 22 15:56            | dimers_structures.xyz |           | Page 155/325 |
|-----------------------------|-----------------------|-----------|--------------|
| H -4.230525                 | 0.044724              | -2.264740 |              |
| H -3.095449                 | -1.523219             | -0.876061 |              |
| C -3.885069                 | -0.035762             | 0.400039  |              |
| O -4.801570                 | 0.744979              | 0.302932  |              |
| O -3.554554                 | -0.657286             | 1.548450  |              |
| H -4.167822                 | -0.380205             | 2.247946  |              |
| H -1.221803                 | -0.859378             | 0.505013  |              |
| H -0.851681                 | -0.544096             | -1.191315 |              |
| S -1.028014                 | 1.505927              | 0.007309  |              |
| H -1.658382                 | 1.596337              | 1.197010  |              |
| C 1.459181                  | -1.513275             | -0.033342 |              |
| C 2.257806                  | -0.169851             | -0.070578 |              |
| O 1.035202                  | -1.856537             | 1.096938  |              |
| O 1.356881                  | -2.092056             | -1.131135 |              |
| H 1.938275                  | 0.426888              | -0.923731 |              |
| C 3.752970                  | -0.465919             | -0.152587 |              |
| N 1.930889                  | 0.607610              | 1.169129  |              |
| H 1.021133                  | 1.081464              | 1.035968  |              |
| H 3.935624                  | -1.054733             | -1.049387 |              |
| H 4.075440                  | -1.048742             | 0.712841  |              |
| S 4.826884                  | 1.034283              | -0.156665 |              |
| H 1.814220                  | -0.067052             | 1.936044  |              |
| H 2.646989                  | 1.305197              | 1.391443  |              |
| H 4.354129                  | 1.555243              | -1.307471 |              |
| 28                          |                       |           |              |
| Dimer 112 of the n...z type |                       |           |              |
| C -1.850737                 | 0.292540              | -0.805691 |              |
| C -2.337464                 | 0.789994              | 0.564331  |              |
| N -2.860369                 | 0.487162              | -1.832970 |              |
| H -3.673710                 | -0.088128             | -1.628574 |              |
| H -2.508806                 | 0.177183              | -2.733372 |              |
| H -0.973598                 | 0.902904              | -1.044759 |              |
| C -1.357912                 | -1.151867             | -0.715147 |              |
| O -1.710657                 | -2.060224             | -1.421278 |              |
| O -0.444041                 | -1.323597             | 0.282479  |              |
| H -0.174478                 | -2.256914             | 0.307680  |              |
| H -1.515953                 | 0.823830              | 1.273702  |              |
| H -2.719187                 | 1.802735              | 0.441231  |              |
| S -3.735724                 | -0.182682             | 1.277563  |              |
| H -3.013038                 | -1.270171             | 1.616859  |              |
| C 1.495973                  | 1.955070              | -0.196547 |              |
| C 2.349412                  | 0.812438              | 0.442559  |              |
| O 0.417372                  | 2.215434              | 0.388161  |              |
| O 1.992173                  | 2.469081              | -1.217610 |              |
| H 3.269885                  | 1.243705              | 0.838162  |              |
| C 2.667854                  | -0.283187             | -0.569726 |              |
| N 1.596652                  | 0.243513              | 1.616167  |              |
| H 1.311814                  | 0.995098              | 2.245757  |              |
| H 3.203063                  | 0.170358              | -1.400197 |              |
| H 1.749236                  | -0.724628             | -0.958557 |              |
| S 3.635256                  | -1.699748             | 0.110501  |              |
| H 0.737622                  | -0.215321             | 1.283217  |              |
| H 2.156762                  | -0.445833             | 2.124017  |              |
| H 4.762362                  | -1.006144             | 0.370744  |              |
| 28                          |                       |           |              |
| Dimer 113 of the n...z type |                       |           |              |
| C -2.761584                 | -0.530811             | 0.425471  |              |
| C -1.296606                 | -0.777871             | 0.043859  |              |
| N -3.674620                 | -1.248280             | -0.448577 |              |
| H -3.596544                 | -0.888896             | -1.396532 |              |
| H -4.633889                 | -1.082550             | -0.160509 |              |
| H -2.877642                 | -0.918217             | 1.445021  |              |
| C -3.057131                 | 0.972021              | 0.524814  |              |
| O -4.000752                 | 1.523574              | 0.011098  |              |
| O -2.131852                 | 1.613927              | 1.264954  |              |
| H -2.363218                 | 2.555150              | 1.317641  |              |
| H -0.632747                 | -0.362715             | 0.797943  |              |
| H -1.102448                 | -1.846618             | -0.022577 |              |
| S -0.830897                 | -0.108739             | -1.614901 |              |

| Nov 11, 22 15:56            | dimers_structures.xyz |           | Page 156/325 |
|-----------------------------|-----------------------|-----------|--------------|
| H -0.845969                 | 1.199240              | -1.282982 |              |
| C 1.691042                  | -1.691730             | 0.836063  |              |
| C 2.553015                  | -0.573281             | 0.156063  |              |
| O 1.336770                  | -2.628965             | 0.083601  |              |
| O 1.467075                  | -1.521910             | 2.050624  |              |
| H 3.598730                  | -0.763558             | 0.405271  |              |
| C 2.160333                  | 0.832353              | 0.593513  |              |
| N 2.432234                  | -0.720713             | -1.335761 |              |
| H 2.602752                  | -1.695362             | -1.593302 |              |
| H 2.236404                  | 0.884063              | 1.676199  |              |
| H 1.128612                  | 1.052260              | 0.319524  |              |
| S 3.156944                  | 2.179002              | -0.179974 |              |
| H 1.459379                  | -0.505592             | -1.621187 |              |
| H 3.071507                  | -0.099657             | -1.836628 |              |
| H 4.330695                  | 1.854101              | 0.399554  |              |
| 28                          |                       |           |              |
| Dimer 114 of the n...z type |                       |           |              |
| C -2.428640                 | 0.723161              | -0.064267 |              |
| C -1.819890                 | -0.118775             | -1.201845 |              |
| N -1.415283                 | 1.124495              | 0.900869  |              |
| H -1.107135                 | 0.317344              | 1.436878  |              |
| H -1.796647                 | 1.790069              | 1.565958  |              |
| H -2.842608                 | 1.622866              | -0.530716 |              |
| C -3.602725                 | -0.023335             | 0.573150  |              |
| O -3.639688                 | -0.394311             | 1.722160  |              |
| O -4.588905                 | -0.238295             | -0.315746 |              |
| H -5.304334                 | -0.733431             | 0.114744  |              |
| H -2.584795                 | -0.373190             | -1.933149 |              |
| H -1.048925                 | 0.468182              | -1.699822 |              |
| S -0.973331                 | -1.658818             | -0.642385 |              |
| H -2.083541                 | -2.322310             | -0.257159 |              |
| C 3.211469                  | -1.228561             | 0.204089  |              |
| C 2.246080                  | -0.013529             | 0.406018  |              |
| O 4.394502                  | -1.036767             | 0.588478  |              |
| O 2.710886                  | -2.220809             | -0.352942 |              |
| H 1.310514                  | -0.335150             | 0.857271  |              |
| C 1.981417                  | 0.651682              | -0.947753 |              |
| N 2.922365                  | 0.948018              | 1.344889  |              |
| H 2.665179                  | 0.776725              | 2.316378  |              |
| H 1.400083                  | -0.044290             | -1.550207 |              |
| H 2.921919                  | 0.840249              | -1.469243 |              |
| S 1.141030                  | 2.291155              | -0.845104 |              |
| H 3.934633                  | 0.752375              | 1.249218  |              |
| H 2.692668                  | 1.921943              | 1.112455  |              |
| H 0.069623                  | 1.871247              | -0.085024 |              |
| 28                          |                       |           |              |
| Dimer 115 of the n...z type |                       |           |              |
| C 2.001269                  | -0.576908             | -0.382300 |              |
| C 1.360644                  | 0.772453              | -0.757833 |              |
| N 1.247198                  | -1.284662             | 0.642618  |              |
| H 1.147776                  | -0.696495             | 1.466867  |              |
| H 1.761795                  | -2.107277             | 0.944747  |              |
| H 2.002743                  | -1.181300             | -1.295995 |              |
| C 3.470623                  | -0.370458             | -0.001012 |              |
| O 3.940938                  | -0.613483             | 1.085346  |              |
| O 4.181853                  | 0.127861              | -1.028190 |              |
| H 5.101109                  | 0.258612              | -0.745309 |              |
| H 1.949095                  | 1.249635              | -1.539354 |              |
| H 0.348870                  | 0.628072              | -1.131790 |              |
| S 1.148309                  | 1.949074              | 0.647941  |              |
| H 2.444615                  | 1.999197              | 1.022578  |              |
| C -2.542095                 | 1.429095              | -0.332245 |              |
| C -2.121191                 | 0.040977              | 0.238578  |              |
| O -3.669777                 | 1.848830              | 0.023849  |              |
| O -1.710839                 | 1.934199              | -1.111742 |              |
| H -1.119911                 | 0.095014              | 0.658062  |              |
| C -2.180650                 | -1.012501             | -0.865481 |              |
| N -3.053259                 | -0.330907             | 1.360688  |              |
| H -2.782772                 | 0.121201              | 2.234549  |              |

Nov 11, 22 15:56

dimers\_structures.xyz

Page 157/325

|                             |           |           |           |
|-----------------------------|-----------|-----------|-----------|
| H                           | -1.552340 | -0.672770 | -1.686427 |
| H                           | -3.200280 | -1.116774 | -1.242058 |
| S                           | -1.640106 | -2.685060 | -0.309436 |
| H                           | -3.987672 | 0.024348  | 1.119213  |
| H                           | -3.067698 | -1.345594 | 1.512289  |
| H                           | -0.403158 | -2.246300 | 0.091063  |
| 28                          |           |           |           |
| Dimer 116 of the n...z type |           |           |           |
| C                           | 2.048306  | 0.450176  | -0.838414 |
| C                           | 2.062001  | 1.261937  | 0.467927  |
| N                           | 0.716647  | -0.029048 | -1.164706 |
| H                           | 0.408880  | -0.739285 | -0.499612 |
| H                           | 0.723136  | -0.480329 | -2.073838 |
| H                           | 2.373626  | 1.139387  | -1.626884 |
| C                           | 3.101508  | -0.662855 | -0.801037 |
| O                           | 2.882246  | -1.827892 | -1.031966 |
| O                           | 4.319290  | -0.185151 | -0.477468 |
| H                           | 4.956175  | -0.917583 | -0.472206 |
| H                           | 3.029139  | 1.740774  | 0.606938  |
| H                           | 1.293586  | 2.031903  | 0.411453  |
| S                           | 1.656963  | 0.292044  | 1.984171  |
| H                           | 2.792300  | -0.436014 | 2.019158  |
| C                           | -2.368982 | -1.637532 | 0.280879  |
| C                           | -2.414016 | -0.246122 | -0.418632 |
| O                           | -3.466983 | -2.083248 | 0.690364  |
| O                           | -1.222487 | -2.122333 | 0.376454  |
| H                           | -1.826251 | -0.276794 | -1.331925 |
| C                           | -1.881619 | 0.831568  | 0.520850  |
| N                           | -3.836022 | 0.066690  | -0.807461 |
| H                           | -4.108188 | -0.432223 | -1.655316 |
| H                           | -0.954899 | 0.470932  | 0.957431  |
| H                           | -2.587305 | 1.025333  | 1.331530  |
| S                           | -1.569982 | 2.437489  | -0.324345 |
| H                           | -4.449444 | -0.272157 | -0.055466 |
| H                           | -3.976285 | 1.068261  | -0.969684 |
| H                           | -0.610253 | 1.907719  | -1.122137 |
| 28                          |           |           |           |
| Dimer 117 of the n...z type |           |           |           |
| C                           | 3.244285  | 0.004255  | 0.897754  |
| C                           | 1.762473  | 0.397044  | 0.917343  |
| N                           | 4.208977  | 1.105258  | 0.964230  |
| H                           | 3.855948  | 1.925864  | 0.478104  |
| H                           | 4.413134  | 1.367644  | 1.920832  |
| H                           | 3.420431  | -0.651395 | 1.757929  |
| C                           | 3.571334  | -0.870665 | -0.326853 |
| O                           | 2.819794  | -1.707571 | -0.773080 |
| O                           | 4.780393  | -0.643648 | -0.841855 |
| H                           | 5.140650  | 0.107451  | -0.304152 |
| H                           | 1.137282  | -0.494241 | 0.899115  |
| H                           | 1.549968  | 0.960840  | 1.825752  |
| S                           | 1.264098  | 1.487811  | -0.483100 |
| H                           | 1.237951  | 0.513291  | -1.414231 |
| C                           | -3.673636 | 0.853822  | -0.389141 |
| C                           | -3.210244 | 0.060311  | 0.882097  |
| O                           | -4.826818 | 0.564304  | -0.798127 |
| O                           | -2.862061 | 1.686906  | -0.829524 |
| H                           | -3.420081 | 0.689858  | 1.749397  |
| C                           | -1.737221 | -0.321418 | 0.883799  |
| N                           | -4.102859 | -1.146940 | 0.994291  |
| H                           | -4.277882 | -1.445005 | 1.953385  |
| H                           | -1.466335 | -0.855263 | 1.795951  |
| H                           | -1.149431 | 0.591469  | 0.818822  |
| S                           | -1.267097 | -1.427444 | -0.513142 |
| H                           | -4.979437 | -0.875050 | 0.515123  |
| H                           | -3.699345 | -1.930555 | 0.469263  |
| H                           | -1.493717 | -0.511376 | -1.476890 |
| 28                          |           |           |           |
| Dimer 118 of the n...z type |           |           |           |
| C                           | 1.360987  | -0.090916 | -0.032623 |

Nov 11, 22 15:56

dimers\_structures.xyz

Page 158/325

|                             |           |           |           |
|-----------------------------|-----------|-----------|-----------|
| C                           | 1.793146  | 1.241005  | -0.665788 |
| N                           | 0.732620  | 0.112186  | 1.260665  |
| H                           | 1.424703  | 0.416174  | 1.939100  |
| H                           | 0.338156  | -0.765277 | 1.586331  |
| H                           | 0.628533  | -0.531749 | -0.716194 |
| C                           | 2.525583  | -1.082085 | -0.000568 |
| O                           | 2.952372  | -1.621071 | 0.992973  |
| O                           | 3.032517  | -1.288546 | -1.232692 |
| H                           | 3.765190  | -1.922102 | -1.171399 |
| H                           | 2.143227  | 1.087501  | -1.684779 |
| H                           | 0.932119  | 1.909194  | -0.686457 |
| S                           | 3.090806  | 2.153290  | 0.280475  |
| H                           | 4.115991  | 1.330790  | -0.023753 |
| C                           | -1.559469 | -1.740325 | -0.374141 |
| C                           | -2.657185 | -0.642193 | -0.199669 |
| O                           | -1.119670 | -2.242916 | 0.690571  |
| O                           | -1.203234 | -1.941061 | -1.549723 |
| H                           | -3.482338 | -0.820857 | -0.886046 |
| C                           | -2.036308 | 0.734064  | -0.438700 |
| N                           | -3.192193 | -0.736564 | 1.205257  |
| H                           | -3.943170 | -1.423625 | 1.275641  |
| H                           | -1.627161 | 0.748439  | -1.446952 |
| H                           | -1.222946 | 0.905613  | 0.271161  |
| S                           | -3.195756 | 2.145577  | -0.206451 |
| H                           | -2.414498 | -1.076906 | 1.790788  |
| H                           | -3.548600 | 0.164205  | 1.540853  |
| H                           | -4.069398 | 1.798823  | -1.174216 |
| 28                          |           |           |           |
| Dimer 119 of the n...z type |           |           |           |
| C                           | 2.770743  | 0.463837  | -0.290021 |
| C                           | 1.689689  | -0.087006 | -1.229909 |
| N                           | 4.053448  | -0.178747 | -0.511321 |
| H                           | 3.991892  | -1.167476 | -0.283447 |
| H                           | 4.753753  | 0.216379  | 0.108200  |
| H                           | 2.866345  | 1.529035  | -0.534122 |
| C                           | 2.308003  | 0.430053  | 1.173641  |
| O                           | 2.957297  | -0.002229 | 2.092512  |
| O                           | 1.072090  | 0.958306  | 1.320873  |
| H                           | 0.825572  | 0.946901  | 2.260147  |
| H                           | 0.787642  | 0.516716  | -1.159933 |
| H                           | 2.055258  | -0.037452 | -2.255010 |
| S                           | 1.268855  | -1.869344 | -0.971681 |
| H                           | 0.934376  | -1.785507 | 0.333474  |
| C                           | -2.804233 | -1.065776 | 0.791372  |
| C                           | -1.840758 | -0.113968 | 0.008745  |
| O                           | -3.522902 | -1.808348 | 0.075753  |
| O                           | -2.764976 | -0.948700 | 2.029550  |
| H                           | -0.843301 | -0.177571 | 0.432982  |
| C                           | -2.350475 | 1.321781  | 0.088406  |
| N                           | -1.782846 | -0.595377 | -1.414325 |
| H                           | -0.981165 | -1.230336 | -1.547533 |
| H                           | -2.426281 | 1.595670  | 1.138693  |
| H                           | -3.342572 | 1.402964  | -0.360147 |
| S                           | -1.300836 | 2.549965  | -0.803350 |
| H                           | -2.652531 | -1.141832 | -1.548070 |
| H                           | -1.704977 | 0.165643  | -2.093539 |
| H                           | -0.216416 | 2.410038  | -0.014575 |
| 28                          |           |           |           |
| Dimer 120 of the n...z type |           |           |           |
| C                           | -1.601102 | 0.013046  | -0.575840 |
| C                           | -3.057567 | 0.407253  | -0.889044 |
| N                           | -1.304721 | -1.344158 | -0.982743 |
| H                           | -1.900450 | -1.988413 | -0.469821 |
| H                           | -0.339020 | -1.598283 | -0.762641 |
| H                           | -0.982214 | 0.707954  | -1.155033 |
| C                           | -1.294637 | 0.302992  | 0.896771  |
| O                           | -0.991938 | -0.524014 | 1.722494  |
| O                           | -1.384839 | 1.623116  | 1.169213  |
| H                           | -1.196175 | 1.769635  | 2.110571  |



| Nov 11, 22 15:56            |           |           | dimers_structures.xyz | Page 159/325 |
|-----------------------------|-----------|-----------|-----------------------|--------------|
| H                           | -3.220776 | 1.463399  | -0.681764             |              |
| H                           | -3.242204 | 0.221597  | -1.946953             |              |
| S                           | -4.333188 | -0.584547 | 0.003375              |              |
| H                           | -4.125061 | -0.056227 | 1.227099              |              |
| C                           | 2.507066  | -1.641308 | -0.080097             |              |
| C                           | 2.203382  | -0.155300 | 0.294379              |              |
| O                           | 3.700298  | -2.000321 | 0.038343              |              |
| O                           | 1.517792  | -2.279908 | -0.494311             |              |
| H                           | 1.345146  | -0.115443 | 0.960028              |              |
| C                           | 1.953057  | 0.642386  | -0.984011             |              |
| N                           | 3.387054  | 0.399572  | 1.039722              |              |
| H                           | 3.332690  | 0.189377  | 2.036769              |              |
| H                           | 1.134056  | 0.172520  | -1.523787             |              |
| S                           | 2.831967  | 0.607609  | -1.631205             |              |
| S                           | 1.620144  | 2.437161  | -0.731875             |              |
| H                           | 4.220930  | -0.085572 | 0.675850              |              |
| H                           | 3.467856  | 1.415828  | 0.931556              |              |
| H                           | 0.513933  | 2.300900  | 0.027623              |              |
| 28                          |           |           |                       |              |
| Dimer 121 of the n...z type |           |           |                       |              |
| C                           | -2.440849 | -1.015203 | -0.590604             |              |
| C                           | -2.958922 | -0.746548 | 0.827035              |              |
| N                           | -1.454097 | -2.085330 | -0.615089             |              |
| H                           | -0.640173 | -1.864357 | -0.043396             |              |
| H                           | -1.108369 | -2.216094 | -1.560439             |              |
| H                           | -3.314180 | -1.346856 | -1.170056             |              |
| C                           | -1.984998 | 0.254521  | -1.327764             |              |
| O                           | -1.159312 | 0.259175  | -2.210716             |              |
| O                           | -2.625608 | 1.363828  | -0.914776             |              |
| H                           | -2.294435 | 2.123862  | -1.420572             |              |
| H                           | -3.814933 | -0.075712 | 0.801316              |              |
| H                           | -3.271555 | -1.694262 | 1.265098              |              |
| S                           | -1.713546 | -0.055644 | 2.004000              |              |
| H                           | -1.667780 | 1.178951  | 1.462725              |              |
| C                           | 2.418310  | -1.435036 | 0.057794              |              |
| C                           | 2.309899  | 0.066343  | 0.488978              |              |
| O                           | 3.371642  | -1.706208 | -0.711747             |              |
| O                           | 1.512273  | -2.170333 | 0.494772              |              |
| H                           | 2.199524  | 0.142684  | 1.568885              |              |
| C                           | 1.110629  | 0.679791  | -0.219013             |              |
| N                           | 3.587974  | 0.756619  | 0.092837              |              |
| H                           | 4.278859  | 0.736882  | 0.843373              |              |
| H                           | 0.241928  | 0.111617  | 0.092407              |              |
| H                           | 1.197455  | 0.593699  | -1.302389             |              |
| S                           | 0.815842  | 2.463731  | 0.111875              |              |
| H                           | 3.970792  | 0.199368  | -0.690173             |              |
| H                           | 3.437639  | 1.733557  | -0.174922             |              |
| H                           | 0.694997  | 2.353339  | 1.451085              |              |
| 28                          |           |           |                       |              |
| Dimer 122 of the n...z type |           |           |                       |              |
| C                           | -1.442266 | -0.596294 | 0.217815              |              |
| C                           | -1.819839 | 0.624994  | 1.083325              |              |
| N                           | -0.668422 | -0.210788 | -0.946423             |              |
| H                           | -1.277695 | 0.039824  | -1.717424             |              |
| H                           | -0.057936 | -0.972356 | -1.234545             |              |
| H                           | -0.827457 | -1.244768 | 0.851115              |              |
| C                           | -2.699247 | -1.399674 | -0.119517             |              |
| O                           | -3.150132 | -1.544426 | -1.231357             |              |
| O                           | -3.272496 | -1.905575 | 0.988671              |              |
| H                           | -4.081989 | -2.380282 | 0.740415              |              |
| H                           | -2.377702 | 0.317437  | 1.966699              |              |
| H                           | -0.902293 | 1.117645  | 1.406489              |              |
| S                           | -2.762534 | 1.929854  | 0.186260              |              |
| H                           | -3.911730 | 1.237598  | 0.044370              |              |
| C                           | 2.625107  | -1.559542 | -0.104226             |              |
| C                           | 2.225603  | -0.120580 | 0.337499              |              |
| O                           | 3.756441  | -1.954047 | 0.260748              |              |
| O                           | 1.764150  | -2.136490 | -0.803000             |              |
| H                           | 1.215889  | -0.130611 | 0.733044              |              |

| Nov 11, 22 15:56            |           |           | dimers_structures.xyz | Page 160/325 |
|-----------------------------|-----------|-----------|-----------------------|--------------|
| C                           | 2.328116  | 0.851990  | -0.833855             |              |
| N                           | 3.130989  | 0.328203  | 1.455837              |              |
| H                           | 2.893696  | -0.138637 | 2.332236              |              |
| H                           | 1.881621  | 0.384936  | -1.707258             |              |
| H                           | 3.372574  | 1.076797  | -1.059650             |              |
| S                           | 1.470808  | 2.452904  | -0.522282             |              |
| H                           | 4.092348  | 0.050641  | 1.227053              |              |
| H                           | 3.075596  | 1.339348  | 1.608223              |              |
| H                           | 0.246178  | 1.875351  | -0.587041             |              |
| 28                          |           |           |                       |              |
| Dimer 123 of the n...z type |           |           |                       |              |
| C                           | 3.137503  | 0.180124  | -0.083293             |              |
| C                           | 2.643286  | -1.041586 | -0.881279             |              |
| N                           | 3.769184  | -0.227141 | 1.162817              |              |
| H                           | 3.061840  | -0.575437 | 1.805150              |              |
| H                           | 4.190949  | 0.576348  | 1.618115              |              |
| H                           | 3.887452  | 0.672800  | -0.711221             |              |
| C                           | 2.000396  | 1.185454  | 0.105601              |              |
| O                           | 1.497870  | 1.463806  | 1.171176              |              |
| O                           | 1.602821  | 1.713646  | -1.063712             |              |
| H                           | 0.839267  | 2.306263  | -0.904456             |              |
| H                           | 2.215750  | -0.729676 | -1.832488             |              |
| H                           | 3.499625  | -1.686707 | -1.073997             |              |
| S                           | 1.388493  | -2.075320 | 0.012788              |              |
| H                           | 0.299995  | -1.724117 | -0.700166             |              |
| C                           | -2.335784 | -1.577505 | -0.197848             |              |
| C                           | -2.646103 | -0.042629 | -0.205906             |              |
| O                           | -2.539934 | -2.163294 | 0.891588              |              |
| O                           | -1.867925 | -2.018223 | -1.265682             |              |
| H                           | -3.273494 | 0.210974  | -1.057466             |              |
| C                           | -1.325461 | 0.714242  | -0.257272             |              |
| N                           | -3.404431 | 0.275461  | 1.055854              |              |
| H                           | -4.413456 | 0.243390  | 0.908744              |              |
| H                           | -0.798760 | 0.406173  | -1.157618             |              |
| H                           | -0.701857 | 0.468691  | 0.603155              |              |
| S                           | -1.467722 | 2.552791  | -0.233787             |              |
| H                           | -3.162447 | -0.487088 | 1.714192              |              |
| H                           | -3.172099 | 1.194394  | 1.441451              |              |
| H                           | -2.144066 | 2.670153  | -1.395079             |              |
| 28                          |           |           |                       |              |
| Dimer 124 of the n...z type |           |           |                       |              |
| C                           | -3.075001 | 0.681195  | 0.769677              |              |
| C                           | -2.616801 | -0.783857 | 0.921005              |              |
| N                           | -4.465671 | 0.757776  | 0.348169              |              |
| H                           | -4.553345 | 0.366943  | -0.586616             |              |
| H                           | -4.758912 | 1.727744  | 0.282497              |              |
| H                           | -2.978413 | 1.140944  | 1.758822              |              |
| C                           | -2.109316 | 1.414602  | -0.159931             |              |
| O                           | -2.361030 | 1.748229  | -1.294362             |              |
| O                           | -0.916441 | 1.626805  | 0.427232              |              |
| H                           | -0.297779 | 1.927759  | -0.257246             |              |
| H                           | -1.599422 | -0.833355 | 1.306119              |              |
| H                           | -3.292771 | -1.279276 | 1.618011              |              |
| S                           | -2.663951 | -1.772694 | -0.638174             |              |
| H                           | -1.458965 | -1.341861 | -1.096238             |              |
| C                           | 0.932149  | -0.670536 | -0.134742             |              |
| C                           | 2.220029  | 0.152287  | 0.192314              |              |
| O                           | 0.621424  | -1.535207 | 0.716187              |              |
| O                           | 0.390231  | -0.393653 | -1.223808             |              |
| H                           | 2.070381  | 1.210318  | -0.011094             |              |
| C                           | 3.380980  | -0.393154 | -0.637305             |              |
| N                           | 2.494568  | -0.007920 | 1.662977              |              |
| H                           | 2.000051  | 0.692205  | 2.216479              |              |
| H                           | 3.123549  | -0.286219 | -1.689168             |              |
| H                           | 3.532702  | -1.454315 | -0.428451             |              |
| S                           | 5.007199  | 0.406204  | -0.299443             |              |
| H                           | 2.105071  | -0.931723 | 1.917318              |              |
| H                           | 3.493460  | 0.057258  | 1.882611              |              |
| H                           | 4.654431  | 1.645799  | -0.697304             |              |

| Nov 11, 22 15:56       | dimers_structures.xyz         | Page 161/325 |
|------------------------|-------------------------------|--------------|
| 28                     |                               |              |
| Dimer 125 of the n...z | type                          |              |
| C                      | 2.046038 0.520998 -0.553058   |              |
| C                      | 3.355937 -0.208791 -0.914327  |              |
| N                      | 2.270985 1.648535 0.330178    |              |
| H                      | 2.571051 1.319853 1.243412    |              |
| H                      | 1.385772 2.136462 0.445940    |              |
| H                      | 1.621062 0.889305 -1.488969   |              |
| C                      | 1.061567 -0.503325 -0.000500  |              |
| O                      | 0.830898 -0.703584 1.165669   |              |
| O                      | 0.482254 -1.238732 -0.994112  |              |
| H                      | 0.059601 -2.022171 -0.604156  |              |
| H                      | 3.161509 -1.008012 -1.629274  |              |
| H                      | 4.030817 0.514172 -1.372908   |              |
| S                      | 4.301068 -0.891960 0.516438   |              |
| H                      | 3.410376 -1.841807 0.868025   |              |
| C                      | -1.466574 1.799424 0.164351   |              |
| C                      | -2.505030 0.718303 -0.268614  |              |
| O                      | -0.517023 1.985667 -0.635044  |              |
| O                      | -1.697346 2.338086 1.262211   |              |
| H                      | -3.481050 1.188233 -0.391696  |              |
| C                      | -2.586226 -0.401678 0.764443  |              |
| N                      | -2.116570 0.177682 -1.621676  |              |
| H                      | -2.100394 0.929704 -2.311581  |              |
| H                      | -2.895207 0.041635 1.708253   |              |
| H                      | -1.607833 -0.858216 0.921107  |              |
| S                      | -3.717898 -1.785335 0.313273  |              |
| H                      | -1.166118 -0.212342 -1.593836 |              |
| H                      | -2.764617 -0.554184 -1.928268 |              |
| H                      | -4.861131 -1.070530 0.355504  |              |
| 28                     |                               |              |
| Dimer 126 of the n...z | type                          |              |
| C                      | -3.230396 0.689880 -0.224950  |              |
| C                      | -1.748589 0.468799 -0.560591  |              |
| N                      | -3.390250 1.538957 0.943744   |              |
| H                      | -3.019900 1.067501 1.765046   |              |
| H                      | -4.376356 1.694864 1.127774   |              |
| H                      | -3.665915 1.202194 -1.091130  |              |
| C                      | -3.974890 -0.647727 -0.121395 |              |
| O                      | -4.677223 -0.975350 0.804649  |              |
| O                      | -3.754462 -1.423411 -1.200463 |              |
| H                      | -4.250210 -2.252223 -1.103224 |              |
| H                      | -1.638005 -0.038318 -1.516557 |              |
| H                      | -1.246190 1.433227 -0.611023  |              |
| S                      | -0.824174 -0.490715 0.722518  |              |
| H                      | -1.326217 -1.703880 0.412569  |              |
| C                      | 3.848651 -1.128298 0.302883   |              |
| C                      | 3.049246 -0.018308 -0.464193  |              |
| O                      | 3.566535 -2.309447 -0.021109  |              |
| O                      | 4.690546 -0.711154 1.119380   |              |
| H                      | 3.712938 0.384613 -1.230792   |              |
| C                      | 2.562614 1.098530 0.448289    |              |
| N                      | 1.910594 -0.688425 -1.183755  |              |
| H                      | 1.666119 -0.231355 -2.061167  |              |
| H                      | 3.428724 1.551958 0.923364    |              |
| H                      | 1.916405 0.703617 1.233537    |              |
| S                      | 1.556579 2.389474 -0.403410   |              |
| H                      | 2.214138 -1.663282 -1.334312  |              |
| H                      | 1.059200 -0.716369 -0.593148  |              |
| H                      | 2.521405 2.811233 -1.246508   |              |
| 28                     |                               |              |
| Dimer 127 of the n...z | type                          |              |
| C                      | -2.765321 0.010812 -0.886149  |              |
| C                      | -1.302903 0.422684 -0.663010  |              |
| N                      | -3.595496 1.155567 -1.228999  |              |
| H                      | -3.607837 1.809948 -0.450273  |              |
| H                      | -4.557523 0.859830 -1.363133  |              |
| H                      | -2.764055 -0.685945 -1.733385 |              |
| C                      | -3.300874 -0.793447 0.304990  |              |

| Nov 11, 22 15:56       | dimers_structures.xyz         | Page 162/325 |
|------------------------|-------------------------------|--------------|
| O                      | -4.348763 -0.576189 0.866083  |              |
| O                      | -2.464223 -1.788629 0.655994  |              |
| H                      | -2.849756 -2.277386 1.400663  |              |
| H                      | -0.652382 -0.449034 -0.606465 |              |
| H                      | -0.990223 1.045606 -1.501373  |              |
| S                      | -1.042009 1.465975 0.840626   |              |
| H                      | -1.136520 0.466649 1.741633   |              |
| C                      | 2.048491 -1.838727 -0.387588  |              |
| C                      | 2.210595 -0.440244 0.292709   |              |
| O                      | 3.072287 -2.565543 -0.370675  |              |
| O                      | 0.934698 -2.043909 -0.905235  |              |
| H                      | 1.359971 -0.221066 0.933713   |              |
| C                      | 2.352370 0.630787 -0.788183   |              |
| N                      | 3.444230 -0.486538 1.153678   |              |
| H                      | 3.237924 -0.847796 2.085103   |              |
| H                      | 1.449583 0.622613 -1.394077   |              |
| H                      | 3.199478 0.405948 -1.439246   |              |
| S                      | 2.661570 2.329218 -0.142696   |              |
| H                      | 4.083278 -1.159631 0.700887   |              |
| H                      | 3.876580 0.437546 1.256123    |              |
| H                      | 1.491233 2.429403 0.524249    |              |
| 28                     |                               |              |
| Dimer 128 of the n...z | type                          |              |
| C                      | -2.847069 -0.771612 0.707186  |              |
| C                      | -3.709436 0.493194 0.636022   |              |
| N                      | -1.723296 -0.768316 1.646540  |              |
| H                      | -1.232780 0.122703 1.610472   |              |
| H                      | -2.035955 -0.918611 2.598552  |              |
| H                      | -3.513029 -1.593449 0.998162  |              |
| C                      | -2.323305 -1.196234 -0.675053 |              |
| O                      | -2.864143 -0.928711 -1.721949 |              |
| O                      | -1.215041 -1.944018 -0.611782 |              |
| H                      | -0.966369 -1.936625 0.344471  |              |
| H                      | -4.517561 0.348259 -0.079958  |              |
| H                      | -4.143310 0.684241 1.617937   |              |
| S                      | -2.789691 2.029993 0.205299   |              |
| H                      | -2.420821 1.640609 -1.031669  |              |
| C                      | 3.878671 0.433786 0.076781    |              |
| C                      | 2.925770 -0.801153 -0.082741  |              |
| O                      | 4.276178 0.644642 1.250096    |              |
| O                      | 4.148143 1.043756 -0.973860   |              |
| H                      | 3.546330 -1.652967 -0.369496  |              |
| C                      | 1.820228 -0.617118 -1.113025  |              |
| N                      | 2.372529 -1.110708 1.283155   |              |
| H                      | 2.122398 -2.090567 1.415463   |              |
| H                      | 1.202810 -1.511263 -1.202433  |              |
| H                      | 2.286044 -0.408789 -2.073159  |              |
| S                      | 0.645556 0.739354 -0.694913   |              |
| H                      | 3.101201 -0.813390 1.951998   |              |
| H                      | 1.545617 -0.530104 1.462704   |              |
| H                      | 1.556706 1.733032 -0.752165   |              |
| 28                     |                               |              |
| Dimer 129 of the n...z | type                          |              |
| C                      | -3.259467 -0.862482 0.575386  |              |
| C                      | -2.201025 -0.010979 1.287139  |              |
| N                      | -2.779917 -1.797630 -0.443121 |              |
| H                      | -2.021187 -1.388320 -0.982147 |              |
| H                      | -2.447131 -2.661644 -0.032462 |              |
| H                      | -3.776281 -1.445585 1.346140  |              |
| C                      | -4.362911 0.017755 -0.039784  |              |
| O                      | -4.745568 1.055449 0.451092   |              |
| O                      | -4.888206 -0.482097 -1.159235 |              |
| H                      | -4.353721 -1.293680 -1.347621 |              |
| H                      | -2.671493 0.615543 2.043230   |              |
| H                      | -1.478408 -0.667343 1.773050  |              |
| S                      | -1.205136 1.052863 0.158425   |              |
| H                      | -2.213248 1.855463 -0.238292  |              |
| C                      | 2.535095 1.307606 -0.348576   |              |
| C                      | 2.171772 -0.022916 0.393881   |              |

| Nov 11, 22 15:56            | dimers_structures.xyz |           |           | Page 163/325 |
|-----------------------------|-----------------------|-----------|-----------|--------------|
| O                           | 1.969411              | 1.475112  | -1.455474 |              |
| O                           | 3.331738              | 2.048845  | 0.258159  |              |
| H                           | 1.420354              | 0.219992  | 1.146858  |              |
| C                           | 3.353973              | -0.701969 | 1.072094  |              |
| N                           | 1.511472              | -0.936046 | -0.603633 |              |
| H                           | 0.893162              | -1.626173 | -0.177645 |              |
| H                           | 3.047269              | -1.618705 | 1.578344  |              |
| H                           | 3.760731              | -0.013197 | 1.808534  |              |
| S                           | 4.688626              | -1.195507 | -0.102524 |              |
| H                           | 0.995293              | -0.331430 | -1.259367 |              |
| H                           | 2.229948              | -1.428607 | -1.146205 |              |
| H                           | 5.001520              | 0.062161  | -0.478022 |              |
| 28                          |                       |           |           |              |
| Dimer 130 of the n...z type |                       |           |           |              |
| C                           | 3.162303              | 0.540228  | -0.163538 |              |
| C                           | 2.717331              | 0.563753  | 1.308071  |              |
| N                           | 2.383252              | 1.452309  | -0.978858 |              |
| H                           | 1.413415              | 1.146119  | -1.056975 |              |
| H                           | 2.747554              | 1.463732  | -1.926261 |              |
| H                           | 4.207766              | 0.873951  | -0.165993 |              |
| C                           | 3.197781              | -0.896957 | -0.698123 |              |
| O                           | 2.684426              | -1.267395 | -1.726348 |              |
| O                           | 3.888141              | -1.715698 | 0.122803  |              |
| H                           | 3.898208              | -2.608895 | -0.256729 |              |
| H                           | 3.455154              | 0.076666  | 1.942028  |              |
| H                           | 2.608017              | 1.601246  | 1.622158  |              |
| S                           | 1.080189              | -0.225333 | 1.634749  |              |
| H                           | 1.476961              | -1.504318 | 1.483073  |              |
| C                           | -1.191793             | 1.282732  | -0.572666 |              |
| C                           | -2.035933             | 0.112659  | 0.019357  |              |
| O                           | -1.241217             | 2.363030  | 0.060370  |              |
| O                           | -0.591331             | 1.007085  | -1.631261 |              |
| H                           | -1.445835             | -0.800837 | 0.019612  |              |
| C                           | -3.314822             | -0.062634 | -0.794753 |              |
| N                           | -2.364215             | 0.447152  | 1.448394  |              |
| H                           | -1.571693             | 0.244505  | 2.060297  |              |
| H                           | -3.033960             | -0.274164 | -1.824536 |              |
| H                           | -3.907880             | 0.854356  | -0.782877 |              |
| S                           | -4.443483             | -1.379931 | -0.166961 |              |
| H                           | -2.520372             | 1.463378  | 1.493851  |              |
| H                           | -3.181732             | -0.071531 | 1.785347  |              |
| H                           | -3.595502             | -2.411058 | -0.358967 |              |
| 28                          |                       |           |           |              |
| Dimer 131 of the n...z type |                       |           |           |              |
| C                           | 2.068600              | -0.602345 | -0.346196 |              |
| C                           | 1.764013              | -0.304469 | 1.126264  |              |
| N                           | 3.369576              | -1.238416 | -0.505455 |              |
| H                           | 4.101499              | -0.597565 | -0.208224 |              |
| H                           | 3.541844              | -1.428941 | -1.487688 |              |
| H                           | 1.293822              | -1.301386 | -0.680556 |              |
| C                           | 1.887013              | 0.634166  | -1.229685 |              |
| O                           | 2.618205              | 0.943863  | -2.141634 |              |
| O                           | 0.787842              | 1.340389  | -0.895814 |              |
| H                           | 0.691913              | 2.087711  | -1.507369 |              |
| H                           | 0.730233              | 0.002283  | 1.251574  |              |
| H                           | 1.915830              | -1.215694 | 1.702225  |              |
| S                           | 2.871005              | 0.964084  | 1.890487  |              |
| H                           | 2.345501              | 2.027564  | 1.248592  |              |
| C                           | -1.240728             | -1.702123 | -0.351816 |              |
| C                           | -2.514114             | -0.833540 | -0.090844 |              |
| O                           | -0.661610             | -2.128388 | 0.677708  |              |
| O                           | -0.917924             | -1.820944 | -1.548108 |              |
| H                           | -3.330791             | -1.155432 | -0.733294 |              |
| C                           | -2.178699             | 0.634722  | -0.335407 |              |
| N                           | -2.928208             | -1.048025 | 1.341307  |              |
| H                           | -3.558932             | -1.844087 | 1.437806  |              |
| H                           | -1.832040             | 0.736365  | -1.360755 |              |
| H                           | -1.366571             | 0.957911  | 0.315959  |              |
| S                           | -3.564057             | 1.804761  | -0.006659 |              |

| Nov 11, 22 15:56            | dimers_structures.xyz |           |           | Page 164/325 |
|-----------------------------|-----------------------|-----------|-----------|--------------|
| H                           | -2.059235             | -1.284502 | 1.849239  |              |
| H                           | -3.390610             | -0.224828 | 1.739411  |              |
| H                           | -4.411817             | 1.306335  | -0.930242 |              |
| 28                          |                       |           |           |              |
| Dimer 132 of the n...z type |                       |           |           |              |
| C                           | -1.698019             | -0.521151 | -0.424714 |              |
| C                           | -3.093345             | -0.535509 | -1.082341 |              |
| N                           | -1.557136             | -1.559973 | 0.576217  |              |
| H                           | -2.087071             | -1.315185 | 1.407182  |              |
| H                           | -0.580871             | -1.673580 | 0.846518  |              |
| H                           | -0.982036             | -0.709899 | -1.230635 |              |
| C                           | -1.413866             | 0.889473  | 0.097265  |              |
| O                           | -1.430274             | 1.212865  | 1.262284  |              |
| O                           | -1.142246             | 1.745104  | -0.905588 |              |
| H                           | -0.938633             | 2.618442  | -0.531819 |              |
| H                           | -3.147896             | 0.203814  | -1.881100 |              |
| H                           | -3.259868             | -1.525349 | -1.507071 |              |
| S                           | -4.503208             | -0.275137 | 0.079679  |              |
| H                           | -4.276392             | 1.030815  | 0.329715  |              |
| C                           | 2.245778              | -1.807086 | 0.195095  |              |
| C                           | 2.829298              | -0.363476 | 0.345741  |              |
| O                           | 2.614331              | -2.438231 | -0.821936 |              |
| O                           | 1.435855              | -2.132259 | 1.087330  |              |
| H                           | 3.251525              | -0.225200 | 1.338756  |              |
| C                           | 1.701123              | 0.632150  | 0.097421  |              |
| N                           | 3.934988              | -0.191660 | -0.660917 |              |
| H                           | 4.836961              | -0.480744 | -0.281608 |              |
| H                           | 0.950404              | 0.458597  | 0.863210  |              |
| H                           | 1.248060              | 0.463006  | -0.880964 |              |
| S                           | 2.177565              | 2.408501  | 0.095919  |              |
| H                           | 3.717656              | -0.829790 | -1.442605 |              |
| H                           | 4.019903              | 0.778762  | -0.979801 |              |
| H                           | 2.566451              | 2.467673  | 1.386019  |              |
| 28                          |                       |           |           |              |
| Dimer 133 of the n...z type |                       |           |           |              |
| C                           | -3.336738             | 0.348169  | 0.661519  |              |
| C                           | -1.828078             | 0.534541  | 0.440753  |              |
| N                           | -3.604006             | -0.510855 | 1.803262  |              |
| H                           | -3.272977             | -1.452230 | 1.606952  |              |
| H                           | -4.605038             | -0.588406 | 1.953240  |              |
| H                           | -3.743245             | 1.344708  | 0.871823  |              |
| C                           | -4.022744             | -0.114739 | -0.629891 |              |
| O                           | -4.761778             | -1.066108 | -0.715409 |              |
| O                           | -3.706168             | 0.678056  | -1.672206 |              |
| H                           | -4.166549             | 0.359364  | -2.465064 |              |
| H                           | -1.645140             | 1.293129  | -0.316406 |              |
| H                           | -1.367616             | 0.853726  | 1.374674  |              |
| S                           | -0.946119             | -1.013858 | -0.047089 |              |
| H                           | -1.240976             | -0.969018 | -1.361235 |              |
| C                           | 4.066514              | -0.874352 | -0.455162 |              |
| C                           | 2.693552              | -0.191946 | -0.147193 |              |
| O                           | 4.631198              | -1.412832 | 0.529659  |              |
| O                           | 4.452861              | -0.765208 | -1.633439 |              |
| H                           | 1.952946              | -0.467974 | -0.894506 |              |
| C                           | 2.877237              | 1.323386  | -0.106767 |              |
| N                           | 2.211027              | -0.699579 | 1.183670  |              |
| H                           | 1.652699              | -1.546470 | 1.075025  |              |
| H                           | 3.254076              | 1.644790  | -1.075534 |              |
| H                           | 3.607199              | 1.601983  | 0.656201  |              |
| S                           | 1.345620              | 2.258672  | 0.318746  |              |
| H                           | 3.058472              | -0.944519 | 1.720358  |              |
| H                           | 1.634026              | -0.007935 | 1.672148  |              |
| H                           | 0.613608              | 1.813261  | -0.721111 |              |
| 28                          |                       |           |           |              |
| Dimer 134 of the n...z type |                       |           |           |              |
| C                           | -2.142654             | 0.622548  | 0.080002  |              |
| C                           | -3.417016             | 0.619132  | 0.944296  |              |
| N                           | -2.360837             | 1.233563  | -1.218384 |              |
| H                           | -2.970867             | 0.644057  | -1.777926 |              |

| Nov 11, 22 15:56            |           |           | dimers_structures.xyz | Page 165/325 |
|-----------------------------|-----------|-----------|-----------------------|--------------|
| H                           | -1.460530 | 1.279732  | -1.689773             |              |
| H                           | -1.397824 | 1.213348  | 0.619897              |              |
| C                           | -1.591991 | -0.800658 | 0.002426              |              |
| O                           | -1.696114 | -1.542144 | -0.946887             |              |
| O                           | -1.001159 | -1.164563 | 1.160747              |              |
| H                           | -0.723278 | -2.091933 | 1.093442              |              |
| H                           | -3.202388 | 0.223441  | 1.936623              |              |
| H                           | -3.767620 | 1.646603  | 1.044586              |              |
| S                           | -4.852107 | -0.297906 | 0.228664              |              |
| H                           | -4.319728 | -1.534327 | 0.313053              |              |
| C                           | 1.193399  | 0.953943  | -0.120438             |              |
| C                           | 2.354913  | -0.061023 | 0.136614              |              |
| O                           | 0.646739  | 0.863537  | -1.251016             |              |
| O                           | 0.960559  | 1.745181  | 0.807833              |              |
| H                           | 2.193506  | -0.576299 | 1.080931              |              |
| C                           | 3.686879  | 0.684799  | 0.146021              |              |
| N                           | 2.315775  | -1.079846 | -0.973888             |              |
| H                           | 1.827303  | -1.931945 | -0.699445             |              |
| H                           | 3.648352  | 1.431979  | 0.935809              |              |
| H                           | 3.842530  | 1.199333  | -0.804795             |              |
| S                           | 5.166791  | -0.392560 | 0.361819              |              |
| H                           | 1.761379  | -0.622812 | -1.723831             |              |
| H                           | 3.249215  | -1.349155 | -1.296159             |              |
| H                           | 4.819065  | -0.889107 | 1.566819              |              |
| 28                          |           |           |                       |              |
| Dimer 135 of the n...z type |           |           |                       |              |
| C                           | 1.959249  | 0.605212  | -0.058433             |              |
| C                           | 2.686015  | -0.189499 | -1.159045             |              |
| N                           | 2.731660  | 1.755998  | 0.370062              |              |
| H                           | 3.582921  | 1.447794  | 0.832417              |              |
| H                           | 2.208608  | 2.296726  | 1.051672              |              |
| H                           | 1.024878  | 0.966594  | -0.501723             |              |
| C                           | 1.563049  | -0.327626 | 1.088029              |              |
| O                           | 1.943560  | -0.244772 | 2.226172              |              |
| O                           | 0.715866  | -1.304373 | 0.663502              |              |
| H                           | 0.507122  | -1.899558 | 1.402359              |              |
| H                           | 2.045590  | -0.975502 | -1.555411             |              |
| H                           | 2.937194  | 0.497537  | -1.966620             |              |
| S                           | 4.291646  | -0.934549 | -0.636490             |              |
| H                           | 3.772207  | -1.910066 | 0.136900              |              |
| C                           | -3.579615 | -1.123216 | 0.127315              |              |
| C                           | -2.339704 | -0.169435 | 0.019505              |              |
| O                           | -3.665106 | -1.994068 | -0.777073             |              |
| O                           | -4.337769 | -0.896129 | 1.085696              |              |
| H                           | -1.760702 | -0.235734 | 0.939028              |              |
| C                           | -2.785220 | 1.267386  | -0.224417             |              |
| N                           | -1.476757 | -0.686844 | -1.101307             |              |
| H                           | -0.616133 | -1.104147 | -0.732008             |              |
| H                           | -3.457815 | 1.555497  | 0.580369              |              |
| H                           | -3.329648 | 1.346636  | -1.168083             |              |
| S                           | -1.400609 | 2.480733  | -0.352658             |              |
| H                           | -2.064334 | -1.424822 | -1.542647             |              |
| H                           | -1.219350 | 0.028403  | -1.783029             |              |
| H                           | -0.946493 | 2.325419  | 0.907757              |              |
| 28                          |           |           |                       |              |
| Dimer 136 of the n...z type |           |           |                       |              |
| C                           | -2.761527 | -0.937487 | 0.081505              |              |
| C                           | -1.340963 | -0.396244 | 0.302920              |              |
| N                           | -2.935183 | -1.431281 | -1.275055             |              |
| H                           | -2.810665 | -0.665711 | -1.932963             |              |
| H                           | -3.885313 | -1.764773 | -1.404974             |              |
| H                           | -2.882517 | -1.776089 | 0.777915              |              |
| C                           | -3.813886 | 0.096832  | 0.496889              |              |
| O                           | -4.729495 | 0.469461  | -0.197788             |              |
| O                           | -3.601414 | 0.547552  | 1.749129              |              |
| H                           | -4.293351 | 1.189176  | 1.976141              |              |
| H                           | -1.177310 | -0.170789 | 1.355159              |              |
| H                           | -0.617228 | -1.143502 | -0.024178             |              |
| S                           | -0.941024 | 1.108373  | -0.691476             |              |

| Nov 11, 22 15:56            |           |           | dimers_structures.xyz | Page 166/325 |
|-----------------------------|-----------|-----------|-----------------------|--------------|
| H                           | -1.674677 | 1.983020  | 0.027078              |              |
| C                           | 2.293164  | -1.796772 | -0.079264             |              |
| C                           | 2.314780  | -0.312282 | 0.408217              |              |
| O                           | 3.296969  | -2.481348 | 0.234821              |              |
| O                           | 1.297984  | -2.107478 | -0.761648             |              |
| H                           | 1.359222  | -0.036896 | 0.846089              |              |
| C                           | 2.641334  | 0.602312  | -0.770147             |              |
| N                           | 3.364032  | -0.183416 | 1.480316              |              |
| H                           | 2.997909  | -0.447427 | 2.395283              |              |
| H                           | 1.873249  | 0.460297  | -1.527241             |              |
| H                           | 3.608159  | 0.339072  | -1.204002             |              |
| S                           | 2.759317  | 2.387654  | -0.331379             |              |
| H                           | 4.108734  | -0.857336 | 1.247946              |              |
| H                           | 3.728349  | 0.772938  | 1.544605              |              |
| H                           | 1.461047  | 2.520834  | 0.015166              |              |
| 28                          |           |           |                       |              |
| Dimer 137 of the n...z type |           |           |                       |              |
| C                           | -3.168408 | 0.584256  | 0.029000              |              |
| C                           | -2.680300 | 0.343600  | -1.408854             |              |
| N                           | -2.373925 | 1.591427  | 0.706059              |              |
| H                           | -1.418764 | 1.267354  | 0.857369              |              |
| H                           | -2.756835 | 1.768532  | 1.629393              |              |
| H                           | -4.198806 | 0.951117  | -0.060403             |              |
| C                           | -3.277781 | -0.739148 | 0.797225              |              |
| O                           | -2.812132 | -0.944839 | 1.892299              |              |
| O                           | -3.973871 | -1.662429 | 0.101900              |              |
| H                           | -4.032352 | -2.476464 | 0.627264              |              |
| H                           | -3.412390 | -0.228159 | -1.975138             |              |
| H                           | -2.532377 | 1.308822  | -1.891938             |              |
| S                           | -1.056270 | -0.524532 | -1.535938             |              |
| H                           | -1.495585 | -1.756581 | -1.2111740            |              |
| C                           | 1.186603  | 1.302534  | 0.421058              |              |
| C                           | 2.066782  | 0.093962  | -0.025888             |              |
| O                           | 1.206047  | 2.297187  | -0.341532             |              |
| O                           | 0.591133  | 1.143620  | 1.505537              |              |
| H                           | 1.506379  | -0.830627 | 0.090020              |              |
| C                           | 3.352282  | 0.059167  | 0.796601              |              |
| N                           | 2.379474  | 0.264034  | -1.487729             |              |
| H                           | 1.604728  | -0.062858 | -2.067720             |              |
| H                           | 3.079359  | -0.025277 | 1.846583              |              |
| H                           | 3.919421  | 0.982609  | 0.662688              |              |
| S                           | 4.515463  | -1.296866 | 0.337132              |              |
| H                           | 2.469207  | 1.276607  | -1.656705             |              |
| H                           | 3.228795  | -0.238673 | -1.763344             |              |
| H                           | 3.688797  | -2.316810 | 0.645764              |              |
| 28                          |           |           |                       |              |
| Dimer 138 of the n...z type |           |           |                       |              |
| C                           | 2.392833  | 1.033060  | -0.806549             |              |
| C                           | 2.213908  | 1.706301  | 0.569463              |              |
| N                           | 1.136441  | 0.943029  | -1.532328             |              |
| H                           | 0.576372  | 0.187087  | -1.154359             |              |
| H                           | 1.308846  | 0.706462  | -2.504334             |              |
| H                           | 3.080292  | 1.670297  | -1.369781             |              |
| C                           | 3.085373  | -0.315607 | -0.606766             |              |
| O                           | 2.524925  | -1.387770 | -0.664605             |              |
| O                           | 4.383538  | -0.171048 | -0.303374             |              |
| H                           | 4.772644  | -1.043838 | -0.129867             |              |
| H                           | 3.179898  | 1.833649  | 1.056734              |              |
| H                           | 1.763072  | 2.686538  | 0.415997              |              |
| S                           | 1.066930  | 0.842515  | 1.727823              |              |
| H                           | 1.767075  | -0.300906 | 1.867241              |              |
| C                           | -3.290644 | 0.819054  | -0.616743             |              |
| C                           | -2.063294 | 0.102278  | 0.031951              |              |
| O                           | -4.313187 | 0.898699  | 0.108582              |              |
| O                           | -3.116967 | 1.187264  | -1.793503             |              |
| H                           | -1.160429 | 0.679814  | -0.138950             |              |
| C                           | -1.942122 | -1.306438 | -0.553998             |              |
| N                           | -2.283470 | 0.040061  | 1.518033              |              |
| H                           | -1.927090 | 0.875924  | 1.981842              |              |

| Nov 11, 22 15:56            |           | dimers_structures.xyz |           | Page 167/325 |
|-----------------------------|-----------|-----------------------|-----------|--------------|
| H                           | -1.722630 | -1.213718             | -1.616059 |              |
| H                           | -2.890452 | -1.837761             | -0.452023 |              |
| S                           | -0.705240 | -2.408220             | 0.259143  |              |
| H                           | -3.305252 | 0.013702              | 1.660604  |              |
| H                           | -1.819603 | -0.774578             | 1.935108  |              |
| H                           | 0.416614  | -1.762076             | -0.124486 |              |
| 28                          |           |                       |           |              |
| Dimer 139 of the n...z type |           |                       |           |              |
| C                           | -3.033125 | -0.169469             | 0.566020  |              |
| C                           | -1.848656 | -1.060959             | 0.173592  |              |
| N                           | -4.268366 | -0.622317             | -0.053256 |              |
| H                           | -4.181813 | -0.572658             | -1.065425 |              |
| H                           | -5.034625 | -0.006897             | 0.201071  |              |
| H                           | -3.138086 | -0.256355             | 1.655287  |              |
| C                           | -2.750578 | 1.317986              | 0.322902  |              |
| O                           | -3.549746 | 2.110025              | -0.104088 |              |
| O                           | -1.485564 | 1.679420              | 0.673342  |              |
| H                           | -1.390920 | 2.638982              | 0.549255  |              |
| H                           | -0.991149 | -0.888155             | 0.818084  |              |
| H                           | -2.144152 | -2.101697             | 0.304376  |              |
| S                           | -1.344852 | -0.934325             | -1.597174 |              |
| H                           | -0.960632 | 0.357813              | -1.567481 |              |
| C                           | 1.616282  | -1.674075             | 0.531054  |              |
| C                           | 1.935737  | -0.228966             | 0.024969  |              |
| O                           | 1.096931  | -1.741796             | 1.673155  |              |
| O                           | 1.948978  | -2.585370             | -0.247364 |              |
| H                           | 1.502026  | -0.081326             | -0.961699 |              |
| C                           | 3.449169  | -0.026553             | -0.018393 |              |
| N                           | 1.299842  | 0.759637              | 0.963544  |              |
| H                           | 0.313732  | 0.941333              | 0.742631  |              |
| H                           | 3.868904  | -0.768819             | -0.693516 |              |
| H                           | 3.885806  | -0.178601             | 0.971188  |              |
| S                           | 3.982200  | 1.664661              | -0.526446 |              |
| H                           | 1.314397  | 0.336525              | 1.901260  |              |
| H                           | 1.793383  | 1.658025              | 0.954066  |              |
| H                           | 3.447453  | 1.629198              | -1.764422 |              |
| 28                          |           |                       |           |              |
| Dimer 140 of the n...z type |           |                       |           |              |
| C                           | 2.542424  | -0.838973             | -0.856031 |              |
| C                           | 1.298508  | -1.103985             | 0.006434  |              |
| N                           | 3.632752  | -1.730559             | -0.500645 |              |
| H                           | 3.932442  | -1.541248             | 0.452429  |              |
| H                           | 4.436858  | -1.553401             | -1.094273 |              |
| H                           | 2.246994  | -1.041323             | -1.892511 |              |
| C                           | 2.926945  | 0.644303              | -0.821304 |              |
| O                           | 4.019657  | 1.070491              | -0.539543 |              |
| O                           | 1.887081  | 1.439239              | -1.160875 |              |
| H                           | 2.182375  | 2.364387              | -1.153948 |              |
| H                           | 0.451413  | -0.534835             | -0.366146 |              |
| H                           | 1.048706  | -2.162245             | -0.054296 |              |
| S                           | 1.521097  | -0.756377             | 1.804007  |              |
| H                           | 1.470380  | 0.589269              | 1.716080  |              |
| C                           | -3.091952 | -1.299695             | -0.346521 |              |
| C                           | -2.377410 | 0.084282              | -0.491676 |              |
| O                           | -4.346767 | -1.258449             | -0.365424 |              |
| O                           | -2.323526 | -2.265065             | -0.186567 |              |
| H                           | -1.560320 | 0.009476              | -1.205804 |              |
| C                           | -1.874415 | 0.533937              | 0.876793  |              |
| N                           | -3.373602 | 1.074108              | -1.034692 |              |
| H                           | -3.416626 | 1.044010              | -2.053573 |              |
| H                           | -1.221697 | -0.239562             | 1.277238  |              |
| H                           | -2.711000 | 0.657657              | 1.568133  |              |
| S                           | -0.997622 | 2.155183              | 0.871319  |              |
| H                           | -4.296303 | 0.773980              | -0.682974 |              |
| H                           | -3.156983 | 2.035118              | -0.752440 |              |
| H                           | -0.032044 | 1.804034              | -0.002680 |              |
| 28                          |           |                       |           |              |
| Dimer 141 of the n...z type |           |                       |           |              |
| C                           | 1.723837  | -0.175632             | -0.506670 |              |

Nov 11, 22 15:56

dimers\_structures.xyz

Page 168/325

|                             |           |           |           |
|-----------------------------|-----------|-----------|-----------|
| C                           | 1.833416  | 0.708365  | 0.745464  |
| N                           | 0.899420  | -1.345105 | -0.252165 |
| H                           | 1.326431  | -1.915473 | 0.473062  |
| H                           | 0.847001  | -1.926410 | -1.082781 |
| H                           | 1.236182  | 0.435727  | -1.276153 |
| C                           | 3.108119  | -0.508299 | -1.072315 |
| O                           | 3.489299  | -1.618885 | -1.354612 |
| O                           | 3.858081  | 0.599536  | -1.229337 |
| H                           | 4.718833  | 0.350479  | -1.602465 |
| H                           | 2.293978  | 1.663397  | 0.503332  |
| H                           | 0.832431  | 0.890916  | 1.133501  |
| S                           | 2.753092  | -0.067017 | 2.145903  |
| H                           | 3.982164  | 0.033154  | 1.598867  |
| C                           | -3.558847 | -1.127918 | -0.093066 |
| C                           | -3.096264 | 0.362141  | 0.020564  |
| O                           | -3.276580 | -1.852278 | 0.892812  |
| O                           | -4.110260 | -1.424167 | -1.169484 |
| H                           | -3.881417 | 1.034436  | -0.319204 |
| C                           | -1.819464 | 0.544356  | -0.795941 |
| N                           | -2.831131 | 0.660103  | 1.472861  |
| H                           | -3.694957 | 0.865346  | 1.975686  |
| H                           | -2.042720 | 0.303685  | -1.833460 |
| H                           | -1.042409 | -0.141039 | -0.444509 |
| S                           | -1.074876 | 2.229259  | -0.695137 |
| H                           | -2.440350 | -0.198622 | 1.886417  |
| H                           | -2.194021 | 1.454603  | 1.591081  |
| H                           | -2.099726 | 2.897217  | -1.263754 |
| 28                          |           |           |           |
| Dimer 142 of the n...z type |           |           |           |
| C                           | 2.202428  | -0.833564 | 0.878269  |
| C                           | 1.526937  | 0.547199  | 0.817457  |
| N                           | 3.396922  | -0.801776 | 1.701190  |
| H                           | 4.094629  | -0.199903 | 1.271466  |
| H                           | 3.809194  | -1.727333 | 1.761227  |
| H                           | 1.473710  | -1.512172 | 1.336694  |
| C                           | 2.444576  | -1.367411 | -0.535696 |
| O                           | 3.517754  | -1.643387 | -1.005395 |
| O                           | 1.283982  | -1.496507 | -1.230754 |
| H                           | 1.478436  | -1.830271 | -2.122125 |
| H                           | 0.587130  | 0.492262  | 0.277946  |
| H                           | 1.323842  | 0.878288  | 1.835624  |
| S                           | 2.533943  | 1.885512  | 0.051778  |
| H                           | 2.381185  | 1.485970  | -1.227583 |
| C                           | -3.328824 | -1.151479 | 0.523791  |
| C                           | -2.154404 | -0.183386 | 0.143931  |
| O                           | -3.604482 | -2.021533 | -0.342202 |
| O                           | -3.858981 | -0.930536 | 1.625846  |
| H                           | -1.408042 | -0.212392 | 0.934844  |
| C                           | -2.683090 | 1.236006  | -0.044342 |
| N                           | -1.535906 | -0.714911 | -1.122460 |
| H                           | -0.615971 | -1.146664 | -0.978890 |
| H                           | -3.170578 | 1.542844  | 0.878324  |
| H                           | -3.425416 | 1.261166  | -0.845244 |
| S                           | -1.406409 | 2.478316  | -0.527445 |
| H                           | -2.212806 | -1.445755 | -1.429176 |
| H                           | -1.419663 | -0.000300 | -1.843020 |
| H                           | -0.715233 | 2.461325  | 0.629059  |
| 28                          |           |           |           |
| Dimer 143 of the n...z type |           |           |           |
| C                           | -2.416588 | 0.790390  | 0.112898  |
| C                           | -3.806726 | 0.401879  | 0.652584  |
| N                           | -2.475973 | 1.236175  | -1.267179 |
| H                           | -2.739452 | 0.460210  | -1.868272 |
| H                           | -1.553174 | 1.541577  | -1.563420 |
| H                           | -2.069379 | 1.618997  | 0.736037  |
| C                           | -1.451736 | -0.373896 | 0.341500  |
| O                           | -1.091634 | -1.151179 | -0.511354 |
| O                           | -1.059564 | -0.451849 | 1.628859  |
| H                           | -0.488866 | -1.229504 | 1.741524  |

| Nov 11, 22 15:56 dimers_structures.xyz Page 169/325 |           |           |           |
|-----------------------------------------------------|-----------|-----------|-----------|
| H                                                   | -3.742068 | 0.140533  | 1.708406  |
| H                                                   | -4.468605 | 1.261155  | 0.543918  |
| S                                                   | -4.652114 | -0.962363 | -0.259188 |
| H                                                   | -3.815282 | -1.954619 | 0.107346  |
| C                                                   | 3.625943  | -1.272653 | -0.159743 |
| C                                                   | 2.904061  | 0.000535  | 0.395747  |
| O                                                   | 4.770042  | -1.069630 | -0.637371 |
| O                                                   | 2.959891  | -2.321453 | -0.099218 |
| H                                                   | 2.450730  | -0.212026 | 1.361644  |
| C                                                   | 1.848104  | 0.453166  | -0.607744 |
| N                                                   | 3.945068  | 1.071342  | 0.590588  |
| H                                                   | 4.381316  | 1.009521  | 1.510729  |
| H                                                   | 1.140800  | -0.361161 | -0.747789 |
| H                                                   | 2.305482  | 0.682235  | -1.572650 |
| S                                                   | 0.947692  | 1.989045  | -0.123036 |
| H                                                   | 4.680237  | 0.875749  | -0.109311 |
| H                                                   | 3.559707  | 2.014585  | 0.482387  |
| H                                                   | 0.497421  | 1.529566  | 1.062411  |
| 28                                                  |           |           |           |
| Dimer 144 of the n...z type                         |           |           |           |
| C                                                   | -3.018788 | -0.890141 | 0.721862  |
| C                                                   | -1.538803 | -0.847324 | 0.308985  |
| N                                                   | -3.690467 | -2.057089 | 0.174765  |
| H                                                   | -3.705365 | -1.995784 | -0.840271 |
| H                                                   | -4.660794 | -2.072257 | 0.472796  |
| H                                                   | -3.032239 | -0.957903 | 1.816009  |
| C                                                   | -3.710282 | 0.434793  | 0.377238  |
| O                                                   | -4.711064 | 0.537988  | -0.291446 |
| O                                                   | -3.062073 | 1.486143  | 0.914133  |
| H                                                   | -3.527441 | 2.303227  | 0.673784  |
| H                                                   | -1.022199 | -0.046407 | 0.833479  |
| H                                                   | -1.073874 | -1.798679 | 0.565960  |
| S                                                   | -1.263165 | -0.635997 | -1.505226 |
| H                                                   | -1.545739 | 0.682143  | -1.548615 |
| C                                                   | 3.838782  | -0.990973 | 0.483975  |
| C                                                   | 3.270242  | 0.446961  | 0.240963  |
| O                                                   | 4.141423  | -1.627287 | -0.556375 |
| O                                                   | 3.878572  | -1.345297 | 1.675958  |
| H                                                   | 3.732190  | 1.160045  | 0.920289  |
| C                                                   | 1.755549  | 0.419311  | 0.428564  |
| N                                                   | 3.618849  | 0.846048  | -1.168766 |
| H                                                   | 4.533321  | 1.295414  | -1.217415 |
| H                                                   | 1.545189  | 0.106703  | 1.449325  |
| H                                                   | 1.298954  | -0.299910 | -0.253704 |
| S                                                   | 0.906196  | 2.015597  | 0.068404  |
| H                                                   | 3.682510  | -0.037744 | -1.701133 |
| H                                                   | 2.927782  | 1.485766  | -1.573378 |
| H                                                   | 1.505454  | 2.730934  | 1.042353  |
| 28                                                  |           |           |           |
| Dimer 145 of the n...z type                         |           |           |           |
| C                                                   | 2.739778  | -0.858226 | -0.451703 |
| C                                                   | 1.604733  | -1.222356 | 0.519615  |
| N                                                   | 4.044869  | -1.080738 | 0.149266  |
| H                                                   | 4.155743  | -0.470453 | 0.955203  |
| H                                                   | 4.778338  | -0.824810 | -0.504304 |
| H                                                   | 2.632053  | -1.524677 | -1.315781 |
| C                                                   | 2.555872  | 0.561917  | -0.999938 |
| O                                                   | 3.390958  | 1.432878  | -0.959813 |
| O                                                   | 1.333356  | 0.732407  | -1.544364 |
| H                                                   | 1.257051  | 1.640653  | -1.878641 |
| H                                                   | 0.645069  | -1.248297 | 0.006096  |
| H                                                   | 1.803128  | -2.216088 | 0.921393  |
| S                                                   | 1.494574  | -0.127563 | 2.003279  |
| H                                                   | 1.073190  | 0.984899  | 1.366564  |
| C                                                   | -2.332211 | -1.602455 | -0.513168 |
| C                                                   | -2.624534 | -0.063993 | -0.545858 |
| O                                                   | -3.076992 | -2.274601 | 0.241836  |
| O                                                   | -1.358929 | -1.962673 | -1.201007 |
| H                                                   | -2.693210 | 0.289452  | -1.572529 |

| Nov 11, 22 15:56 dimers_structures.xyz Page 170/325 |           |           |           |
|-----------------------------------------------------|-----------|-----------|-----------|
| C                                                   | -1.501288 | 0.647303  | 0.198382  |
| N                                                   | -3.952773 | 0.170700  | 0.123172  |
| H                                                   | -4.721430 | 0.144352  | -0.546847 |
| H                                                   | -0.578445 | 0.426472  | -0.326313 |
| H                                                   | -1.419312 | 0.271952  | 1.219706  |
| S                                                   | -1.673627 | 2.471953  | 0.359581  |
| H                                                   | -4.082002 | -0.627092 | 0.768733  |
| H                                                   | -3.991870 | 1.068022  | 0.615521  |
| H                                                   | -1.599353 | 2.748409  | -0.958836 |
| 28                                                  |           |           |           |
| Dimer 146 of the n...z type                         |           |           |           |
| C                                                   | -1.562686 | 0.461647  | 0.091160  |
| C                                                   | -1.300648 | -0.930087 | -0.508484 |
| N                                                   | -1.126103 | 0.530238  | 1.474881  |
| H                                                   | -1.656970 | -0.130151 | 2.036375  |
| H                                                   | -1.312161 | 1.451648  | 1.857845  |
| H                                                   | -0.970746 | 1.174125  | -0.496178 |
| C                                                   | -3.021723 | 0.882037  | -0.116035 |
| O                                                   | -3.765385 | 1.250493  | 0.761357  |
| O                                                   | -3.382015 | 0.795905  | -1.411025 |
| H                                                   | -4.306629 | 1.076468  | -1.503085 |
| H                                                   | -1.483359 | -0.923720 | -1.581292 |
| H                                                   | -0.262657 | -1.212289 | -0.328284 |
| S                                                   | -2.289975 | -2.285764 | 0.259027  |
| H                                                   | -3.478392 | -1.942163 | -0.279525 |
| C                                                   | 2.824730  | -1.421863 | 0.139954  |
| C                                                   | 2.877503  | 0.067338  | -0.335181 |
| O                                                   | 1.946338  | -2.121468 | -0.428858 |
| O                                                   | 3.607386  | -1.719343 | 1.058467  |
| H                                                   | 3.902455  | 0.420736  | -0.419105 |
| C                                                   | 2.088348  | 0.905031  | 0.676387  |
| N                                                   | 2.252110  | 0.127690  | -1.702552 |
| H                                                   | 2.938966  | -0.026873 | -2.440449 |
| H                                                   | 2.664839  | 0.941313  | 1.598983  |
| H                                                   | 1.120070  | 0.454849  | 0.907169  |
| S                                                   | 1.663982  | 2.612734  | 0.135135  |
| H                                                   | 1.578741  | -0.656102 | -1.735009 |
| H                                                   | 1.790494  | 1.028823  | -1.872421 |
| H                                                   | 2.925458  | 3.077005  | 0.015750  |
| 28                                                  |           |           |           |
| Dimer 147 of the n...z type                         |           |           |           |
| C                                                   | 1.760781  | -0.229865 | 0.122490  |
| C                                                   | 2.663087  | -1.302500 | 0.756300  |
| N                                                   | 1.329099  | -0.611189 | -1.210645 |
| H                                                   | 2.144029  | -0.797639 | -1.789650 |
| H                                                   | 0.847990  | 0.168210  | -1.648942 |
| H                                                   | 0.886274  | -0.153080 | 0.775598  |
| C                                                   | 2.440546  | 1.140036  | 0.178386  |
| O                                                   | 2.762898  | 1.795233  | -0.783792 |
| O                                                   | 2.651312  | 1.530476  | 1.450408  |
| H                                                   | 3.091613  | 2.395307  | 1.447823  |
| H                                                   | 2.875220  | -1.051075 | 1.793742  |
| H                                                   | 2.139702  | -2.258256 | 0.725720  |
| S                                                   | 4.256225  | -1.599983 | -0.128605 |
| H                                                   | 4.840434  | -0.426375 | 0.189153  |
| C                                                   | -3.676309 | -1.368854 | 0.061418  |
| C                                                   | -3.191091 | 0.046434  | -0.400403 |
| O                                                   | -4.447718 | -1.371076 | 1.052591  |
| O                                                   | -3.201676 | -2.320627 | -0.584082 |
| H                                                   | -3.263376 | 0.138631  | -1.482054 |
| C                                                   | -1.751377 | 0.252786  | 0.061063  |
| N                                                   | -4.103467 | 1.072584  | 0.218021  |
| H                                                   | -4.929406 | 1.234706  | -0.358785 |
| H                                                   | -1.139441 | -0.520717 | -0.400460 |
| H                                                   | -1.677659 | 0.150623  | 1.146058  |
| S                                                   | -1.050879 | 1.918564  | -0.310803 |
| H                                                   | -4.430018 | 0.661631  | 1.107688  |
| H                                                   | -3.633724 | 1.971475  | 0.365755  |
| H                                                   | -1.208957 | 1.859210  | -1.649283 |

| Nov 11, 22 15:56       | dimers_structures.xyz | Page 171/325 |
|------------------------|-----------------------|--------------|
| 28                     |                       |              |
| Dimer 148 of the n...z | type                  |              |
| C                      | -2.124499             | 0.128423     |
| C                      | -1.580485             | -1.204413    |
| N                      | -3.013517             | -0.075955    |
| H                      | -3.833825             | -0.596448    |
| H                      | -3.352087             | 0.817564     |
| H                      | -1.254598             | 0.703411     |
| C                      | -2.746762             | 0.959157     |
| O                      | -3.838214             | 1.471884     |
| O                      | -1.913035             | 1.062643     |
| H                      | -2.327803             | 1.612952     |
| H                      | -0.802375             | -1.031313    |
| H                      | -1.158651             | -1.767598    |
| S                      | -2.860533             | -2.308807    |
| H                      | -3.044349             | -1.593449    |
| C                      | 3.802045              | -0.900489    |
| C                      | 2.442228              | -0.206468    |
| O                      | 4.560731              | -1.100439    |
| O                      | 3.983448              | -1.127629    |
| H                      | 1.624443              | -0.693570    |
| C                      | 2.527039              | 1.272524     |
| N                      | 2.204436              | -0.358002    |
| H                      | 1.775791              | -1.257004    |
| H                      | 2.722549              | 1.342403     |
| H                      | 3.353852              | 1.749439     |
| S                      | 1.033756              | 2.264859     |
| H                      | 3.136380              | -0.350756    |
| H                      | 1.604321              | 0.384760     |
| H                      | 0.187507              | 1.676392     |
| 28                     |                       |              |
| Dimer 149 of the n...z | type                  |              |
| C                      | -3.275450             | 0.909784     |
| C                      | -4.030846             | -0.428104    |
| N                      | -3.789224             | 1.846044     |
| H                      | -3.627356             | 1.479162     |
| H                      | -3.281008             | 2.723151     |
| H                      | -3.458566             | 1.324072     |
| C                      | -1.760352             | 0.682860     |
| O                      | -1.047465             | 1.259840     |
| O                      | -1.320044             | -0.176016    |
| H                      | -0.319943             | -0.323313    |
| H                      | -3.734969             | -1.071426    |
| H                      | -5.099304             | -0.227720    |
| S                      | -3.826392             | -1.360249    |
| H                      | -2.570136             | -1.795923    |
| C                      | 1.902700              | -1.081249    |
| C                      | 2.242796              | -0.116730    |
| O                      | 1.205507              | -0.591000    |
| O                      | 2.361743              | -2.225327    |
| H                      | 1.715664              | -0.467770    |
| C                      | 3.739365              | -0.069404    |
| N                      | 1.709226              | 1.254195     |
| H                      | 1.891078              | 1.904309     |
| H                      | 3.946971              | 0.590793     |
| H                      | 4.068658              | -1.072690    |
| S                      | 4.769403              | 0.569938     |
| H                      | 0.677024              | 1.225784     |
| H                      | 2.156987              | 1.622079     |
| H                      | 4.599519              | -0.490128    |
| 28                     |                       |              |
| Dimer 150 of the n...z | type                  |              |
| C                      | -2.957711             | 0.171413     |
| C                      | -3.840760             | 0.618590     |
| N                      | -3.346417             | -1.147424    |
| H                      | -3.185135             | -1.833507    |
| H                      | -2.752054             | -1.421810    |
| H                      | -3.132464             | 0.895858     |
| C                      | -1.467831             | 0.298439     |

| Nov 11, 22 15:56       | dimers_structures.xyz | Page 172/325 |
|------------------------|-----------------------|--------------|
| O                      | -0.684060             | -0.630363    |
| O                      | -1.149884             | 1.519971     |
| H                      | -0.165488             | 1.593636     |
| H                      | -3.634764             | 1.653841     |
| H                      | -4.887335             | 0.529153     |
| S                      | -3.679645             | -0.419610    |
| H                      | -2.456044             | 0.014305     |
| C                      | 2.168283              | 1.270557     |
| C                      | 3.403053              | 0.561358     |
| O                      | 1.309358              | 1.691232     |
| O                      | 2.144303              | 1.352239     |
| H                      | 4.272162              | 1.202810     |
| C                      | 3.667023              | -0.809471    |
| N                      | 3.176553              | 0.455477     |
| H                      | 4.018492              | 0.603777     |
| H                      | 4.612700              | -1.223742    |
| H                      | 3.718223              | -0.683382    |
| S                      | 2.394497              | -2.073166    |
| H                      | 2.450993              | 1.153117     |
| H                      | 2.785435              | -0.471013    |
| H                      | 1.316603              | -1.414939    |
| 28                     |                       |              |
| Dimer 151 of the n...z | type                  |              |
| C                      | 2.494109              | 0.979204     |
| C                      | 3.599493              | -0.024966    |
| N                      | 2.975701              | 1.981906     |
| H                      | 3.236227              | 1.533242     |
| H                      | 2.229949              | 2.632749     |
| H                      | 2.222456              | 1.483625     |
| C                      | 1.217311              | 0.258159     |
| O                      | 0.640692              | 0.531045     |
| O                      | 0.811814              | -0.656009    |
| H                      | -0.042337             | -1.106922    |
| H                      | 3.273347              | -0.686642    |
| H                      | 4.476456              | 0.527556     |
| S                      | 4.193968              | -1.052175    |
| H                      | 3.121407              | -1.866853    |
| C                      | -2.548554             | -1.416880    |
| C                      | -2.988714             | -0.507617    |
| O                      | -1.360030             | -1.858283    |
| O                      | -3.406483             | -1.621234    |
| H                      | -3.784990             | -1.023095    |
| C                      | -3.525634             | 0.844502     |
| N                      | -1.845536             | -0.349482    |
| H                      | -2.103393             | 0.220578     |
| H                      | -3.803575             | 1.466927     |
| H                      | -4.420215             | 0.662405     |
| S                      | -2.344966             | 1.859351     |
| H                      | -1.554788             | -1.267899    |
| H                      | -0.993950             | 0.062434     |
| H                      | -2.327779             | 1.061535     |
| 28                     |                       |              |
| Dimer 152 of the n...z | type                  |              |
| C                      | -3.068110             | 0.761384     |
| C                      | -3.376148             | -0.739667    |
| N                      | -3.489020             | 1.506883     |
| H                      | -2.939659             | 1.205945     |
| H                      | -3.285707             | 2.493891     |
| H                      | -3.650223             | 1.109936     |
| C                      | -1.588181             | 0.938295     |
| O                      | -0.796621             | 1.541682     |
| O                      | -1.275793             | 0.332743     |
| H                      | -0.263998             | 0.222217     |
| H                      | -3.212853             | -1.258058    |
| H                      | -4.419643             | -0.856696    |
| S                      | -2.401486             | -1.594808    |
| H                      | -1.210172             | -1.601861    |
| C                      | 1.534074              | -0.851609    |
| C                      | 2.984296              | -0.721740    |

| Nov 11, 22 15:56 dimers_structures.xyz Page 173/325 |           |           |           |
|-----------------------------------------------------|-----------|-----------|-----------|
| O                                                   | 0.801727  | -1.696571 | 0.377275  |
| O                                                   | 1.256113  | -0.079581 | 1.885360  |
| H                                                   | 3.655065  | -1.203342 | 1.100675  |
| C                                                   | 3.424112  | 0.724591  | 0.169856  |
| N                                                   | 3.045098  | -1.513209 | -0.890738 |
| H                                                   | 3.937709  | -1.982210 | -1.042476 |
| H                                                   | 4.465937  | 0.769609  | -0.149352 |
| H                                                   | 3.323614  | 1.254803  | 1.113711  |
| S                                                   | 2.463119  | 1.593488  | -1.141443 |
| H                                                   | 2.271121  | -2.196131 | -0.840003 |
| H                                                   | 2.849524  | -0.893718 | -1.687949 |
| H                                                   | 1.256964  | 1.547314  | -0.524303 |
| 28                                                  |           |           |           |
| Dimer 153 of the n...z type                         |           |           |           |
| C                                                   | 3.266993  | -0.834637 | 0.709391  |
| C                                                   | 4.164679  | 0.402978  | 0.563150  |
| N                                                   | 3.816057  | -1.970911 | -0.017970 |
| H                                                   | 3.838183  | -1.754483 | -1.011679 |
| H                                                   | 3.198879  | -2.771299 | 0.079587  |
| H                                                   | 3.261702  | -1.081011 | 1.778537  |
| C                                                   | 1.805404  | -0.506990 | 0.355606  |
| O                                                   | 1.149168  | -1.160585 | -0.433829 |
| O                                                   | 1.353645  | 0.549034  | 1.015591  |
| H                                                   | 0.378827  | 0.753395  | 0.790364  |
| H                                                   | 3.826977  | 1.201978  | 1.218927  |
| H                                                   | 5.185917  | 0.132974  | 0.831951  |
| S                                                   | 4.284685  | 1.064599  | -1.157998 |
| H                                                   | 3.045781  | 1.594989  | -1.214113 |
| C                                                   | -2.032021 | 0.547364  | 0.945407  |
| C                                                   | -3.433525 | 0.956291  | 0.400998  |
| O                                                   | -1.068919 | 1.218864  | 0.459023  |
| O                                                   | -1.996242 | -0.350238 | 1.792188  |
| H                                                   | -3.868217 | 1.652537  | 1.121703  |
| C                                                   | -4.387975 | -0.214795 | 0.197811  |
| N                                                   | -3.221062 | 1.726098  | -0.875096 |
| H                                                   | -3.944984 | 2.420944  | -1.060355 |
| H                                                   | -5.370182 | 0.133563  | -0.123503 |
| H                                                   | -4.496172 | -0.735714 | 1.145927  |
| S                                                   | -3.835434 | -1.402347 | -1.098227 |
| H                                                   | -2.295022 | 2.172787  | -0.794238 |
| H                                                   | -3.178283 | 1.073961  | -1.667919 |
| H                                                   | -2.738953 | -1.834836 | -0.442079 |
| 28                                                  |           |           |           |
| Dimer 154 of the n...z type                         |           |           |           |
| C                                                   | 3.064785  | -0.768919 | 0.340320  |
| C                                                   | 3.382722  | 0.730463  | 0.191615  |
| N                                                   | 3.483292  | -1.513629 | -0.838624 |
| H                                                   | 2.934607  | -1.209771 | -1.639337 |
| H                                                   | 3.276972  | -2.500220 | -0.715394 |
| H                                                   | 3.643437  | -1.123534 | 1.200887  |
| C                                                   | 1.583439  | -0.938337 | 0.704175  |
| O                                                   | 0.789598  | -1.535340 | -0.002748 |
| O                                                   | 1.273135  | -0.335092 | 1.839948  |
| H                                                   | 0.261502  | -0.220991 | 1.926871  |
| H                                                   | 3.219656  | 1.248063  | 1.134457  |
| H                                                   | 4.427974  | 0.841182  | -0.096643 |
| S                                                   | 2.418538  | 1.595192  | -1.127510 |
| H                                                   | 1.229089  | 1.627133  | -0.479414 |
| C                                                   | -1.532842 | 0.852112  | 0.928996  |
| C                                                   | -2.984468 | 0.726494  | 0.386905  |
| O                                                   | -0.796900 | 1.689973  | 0.368906  |
| O                                                   | -1.257292 | 0.083280  | 1.886064  |
| H                                                   | -3.652624 | 1.210441  | 1.101821  |
| C                                                   | -3.428585 | -0.718926 | 0.172208  |
| N                                                   | -3.045497 | 1.516938  | -0.891094 |
| H                                                   | -3.936355 | 1.990007  | -1.040467 |
| H                                                   | -4.471134 | -0.761398 | -0.145020 |
| H                                                   | -3.327848 | -1.248482 | 1.116423  |
| S                                                   | -2.472330 | -1.591544 | -1.140038 |

| Nov 11, 22 15:56 dimers_structures.xyz Page 174/325 |           |           |           |
|-----------------------------------------------------|-----------|-----------|-----------|
| H                                                   | -2.268140 | 2.196231  | -0.843515 |
| H                                                   | -2.855225 | 0.895871  | -1.688362 |
| H                                                   | -1.264440 | -1.545945 | -0.526177 |
| 28                                                  |           |           |           |
| Dimer 155 of the n...z type                         |           |           |           |
| C                                                   | 2.932645  | -0.492350 | 1.047695  |
| C                                                   | 3.889395  | 0.650152  | 0.671679  |
| N                                                   | 3.542512  | -1.791415 | 0.805515  |
| H                                                   | 3.717467  | -1.903206 | -0.190090 |
| H                                                   | 2.895334  | -2.530274 | 1.062587  |
| H                                                   | 2.749403  | -0.392348 | 2.124405  |
| C                                                   | 1.563527  | -0.303418 | 0.375391  |
| O                                                   | 1.039189  | -1.146022 | -0.328701 |
| O                                                   | 1.021164  | 0.872441  | 0.662557  |
| H                                                   | 0.125870  | 1.002460  | 0.208756  |
| H                                                   | 3.478054  | 1.610329  | 0.974815  |
| H                                                   | 4.839179  | 0.496001  | 1.183496  |
| S                                                   | 4.324572  | 0.731587  | -1.121632 |
| H                                                   | 3.137181  | 1.198975  | -1.559081 |
| C                                                   | -2.418104 | 1.421468  | -0.099234 |
| C                                                   | -2.768954 | 0.245655  | 0.864673  |
| O                                                   | -3.351857 | 2.193970  | -0.387782 |
| O                                                   | -1.220391 | 1.479782  | -0.477734 |
| H                                                   | -2.337833 | 0.481202  | 1.839951  |
| C                                                   | -2.257001 | -1.118778 | 0.411880  |
| N                                                   | -4.264810 | 0.243928  | 1.027200  |
| H                                                   | -4.576648 | -0.013372 | 1.963467  |
| H                                                   | -2.488349 | -1.881279 | 1.156832  |
| H                                                   | -1.178311 | -1.075537 | 0.284334  |
| S                                                   | -3.019318 | -1.719155 | -1.154787 |
| H                                                   | -4.575262 | 1.198190  | 0.777320  |
| H                                                   | -4.687695 | -0.397192 | 0.345088  |
| H                                                   | -2.480265 | -0.778197 | -1.957404 |
| 28                                                  |           |           |           |
| Dimer 156 of the n...z type                         |           |           |           |
| C                                                   | 3.094442  | 0.956039  | -0.178858 |
| C                                                   | 3.498806  | -0.395083 | -0.788646 |
| N                                                   | 3.762921  | 1.180636  | 1.094446  |
| H                                                   | 3.459303  | 0.478376  | 1.764628  |
| H                                                   | 3.479708  | 2.076626  | 1.478850  |
| H                                                   | 3.435421  | 1.721639  | -0.886566 |
| C                                                   | 1.565700  | 1.102772  | -0.120918 |
| O                                                   | 0.957397  | 1.381288  | 0.896262  |
| O                                                   | 0.992467  | 0.898340  | -1.299267 |
| H                                                   | -0.015247 | 1.034726  | -1.258543 |
| H                                                   | 3.093099  | -0.501782 | -1.792108 |
| H                                                   | 4.586271  | -0.444722 | -0.841485 |
| S                                                   | 3.004745  | -1.870348 | 0.208231  |
| H                                                   | 1.695790  | -1.858987 | -0.112949 |
| C                                                   | -2.431697 | 1.187829  | -0.486866 |
| C                                                   | -2.059991 | 0.331761  | 0.760808  |
| O                                                   | -3.547929 | 1.739812  | -0.465260 |
| O                                                   | -1.554689 | 1.254846  | -1.388221 |
| H                                                   | -1.320736 | 0.898633  | 1.328787  |
| C                                                   | -1.472866 | -1.039687 | 0.438710  |
| N                                                   | -3.302969 | 0.215618  | 1.598415  |
| H                                                   | -3.124861 | 0.230620  | 2.602275  |
| H                                                   | -1.169930 | -1.553212 | 1.351955  |
| H                                                   | -0.592461 | -0.904178 | -0.182314 |
| S                                                   | -2.643252 | -2.185495 | -0.403644 |
| H                                                   | -3.904855 | 1.007316  | 1.314209  |
| H                                                   | -3.809399 | -0.645957 | 1.361384  |
| H                                                   | -2.759975 | -1.475464 | -1.545026 |
| 28                                                  |           |           |           |
| Dimer 157 of the n...z type                         |           |           |           |
| C                                                   | 3.016249  | 1.046497  | -0.220286 |
| C                                                   | 3.197279  | -0.250374 | -1.029592 |
| N                                                   | 3.957013  | 1.109158  | 0.887582  |
| H                                                   | 3.745387  | 0.371553  | 1.554604  |



| Nov 11, 22 15:56 dimers_structures.xyz Page 175/325 |           |           |           |
|-----------------------------------------------------|-----------|-----------|-----------|
| H                                                   | 3.847667  | 1.985960  | 1.387530  |
| H                                                   | 3.239032  | 1.867266  | -0.911340 |
| C                                                   | 1.547655  | 1.224756  | 0.188042  |
| O                                                   | 1.162782  | 1.242369  | 1.341424  |
| O                                                   | 0.748477  | 1.348884  | -0.866857 |
| H                                                   | -0.212536 | 1.475257  | -0.601337 |
| H                                                   | 2.543537  | -0.253904 | -1.899721 |
| H                                                   | 4.231662  | -0.305004 | -1.368408 |
| S                                                   | 2.926220  | -1.809138 | -0.076396 |
| H                                                   | 1.574349  | -1.784859 | -0.079143 |
| C                                                   | -2.859544 | 1.070742  | -0.342577 |
| C                                                   | -2.862355 | 0.029859  | 0.823131  |
| O                                                   | -3.934801 | 1.184625  | -0.962735 |
| O                                                   | -1.796963 | 1.718965  | -0.508497 |
| H                                                   | -3.072436 | 0.586908  | 1.739398  |
| C                                                   | -1.572134 | -0.755543 | 1.011074  |
| N                                                   | -4.038983 | -0.877993 | 0.586428  |
| H                                                   | -4.476571 | -1.217319 | 1.443019  |
| H                                                   | -1.656549 | -1.437850 | 1.858121  |
| H                                                   | -0.762042 | -0.059797 | 1.218483  |
| S                                                   | -1.132404 | -1.826195 | -0.423834 |
| H                                                   | -4.706398 | -0.322028 | 0.024655  |
| H                                                   | -3.754049 | -1.684128 | 0.018439  |
| H                                                   | -0.907188 | -0.829248 | -1.304134 |
| 28                                                  |           |           |           |
| Dimer 158 of the n...z type                         |           |           |           |
| C                                                   | 3.299084  | -0.819986 | 0.709918  |
| C                                                   | 4.180183  | 0.429967  | 0.568217  |
| N                                                   | 3.874173  | -1.952117 | -0.003468 |
| H                                                   | 3.905383  | -1.741635 | -0.998181 |
| H                                                   | 3.268050  | -2.761181 | 0.091770  |
| C                                                   | 3.283481  | -1.060265 | 1.780346  |
| C                                                   | 1.837373  | -0.516132 | 0.335886  |
| O                                                   | 1.201532  | -1.181925 | -0.460009 |
| O                                                   | 1.360585  | 0.534197  | 0.987176  |
| H                                                   | 0.382976  | 0.717168  | 0.756370  |
| H                                                   | 3.821104  | 1.228126  | 1.213588  |
| H                                                   | 5.201317  | 0.177231  | 0.853631  |
| S                                                   | 4.315409  | 1.082038  | -1.155510 |
| C                                                   | 3.070139  | 1.594675  | -1.232849 |
| C                                                   | -2.022134 | 0.470395  | 0.934481  |
| C                                                   | -3.444300 | 0.919357  | 0.484265  |
| O                                                   | -1.076525 | 1.160928  | 0.439964  |
| O                                                   | -1.955086 | -0.472465 | 1.728377  |
| H                                                   | -3.842733 | 1.559741  | 1.274295  |
| C                                                   | -4.410991 | -0.233679 | 0.239532  |
| N                                                   | -3.286926 | 1.782254  | -0.738852 |
| H                                                   | -3.992761 | 2.514982  | -0.814770 |
| H                                                   | -5.406522 | 0.137379  | -0.006451 |
| H                                                   | -4.474198 | -0.825417 | 1.149390  |
| S                                                   | -3.924682 | -1.317751 | -1.169255 |
| H                                                   | -2.339827 | 2.188861  | -0.683299 |
| H                                                   | -3.322739 | 1.198875  | -1.584039 |
| H                                                   | -2.795364 | -1.793498 | -0.605180 |
| 28                                                  |           |           |           |
| Dimer 159 of the n...z type                         |           |           |           |
| C                                                   | -3.580688 | -0.354403 | -0.578062 |
| C                                                   | -3.232908 | 1.122189  | -0.838796 |
| N                                                   | -4.625884 | -0.478207 | 0.428787  |
| H                                                   | -4.281267 | -0.114925 | 1.314238  |
| H                                                   | -4.833240 | -1.458972 | 0.591309  |
| H                                                   | -3.961161 | -0.754155 | -1.525410 |
| C                                                   | -2.296626 | -1.133657 | -0.256164 |
| O                                                   | -2.121380 | -1.733835 | 0.787301  |
| O                                                   | -1.402884 | -1.044863 | -1.231973 |
| H                                                   | -0.474061 | -1.302244 | -0.904271 |
| H                                                   | -2.585095 | 1.209825  | -1.708132 |
| H                                                   | -4.153528 | 1.674747  | -1.026006 |
| S                                                   | -2.424998 | 1.983636  | 0.583392  |

| Nov 11, 22 15:56 dimers_structures.xyz Page 176/325 |           |           |           |
|-----------------------------------------------------|-----------|-----------|-----------|
| H                                                   | -1.220665 | 1.365818  | 0.496205  |
| C                                                   | 1.409158  | -0.471963 | 0.277669  |
| C                                                   | 2.842461  | -0.634811 | 0.861772  |
| O                                                   | 1.013477  | -1.451441 | -0.426297 |
| O                                                   | 0.800316  | 0.563152  | 0.574583  |
| H                                                   | 2.730883  | -0.995649 | 1.886729  |
| C                                                   | 3.661740  | 0.650903  | 0.870254  |
| N                                                   | 3.532361  | -1.726438 | 0.088546  |
| H                                                   | 4.212465  | -2.249746 | 0.640700  |
| H                                                   | 4.630147  | 0.492259  | 1.346102  |
| H                                                   | 3.114302  | 1.401080  | 1.435491  |
| S                                                   | 4.036322  | 1.298258  | -0.813666 |
| H                                                   | 2.789217  | -2.349692 | -0.262206 |
| H                                                   | 4.008426  | -1.324995 | -0.728749 |
| H                                                   | 2.762005  | 1.595213  | -1.141891 |
| 28                                                  |           |           |           |
| Dimer 160 of the n...z type                         |           |           |           |
| C                                                   | 3.584363  | -0.354135 | 0.571331  |
| C                                                   | 3.240970  | 1.122398  | 0.837157  |
| N                                                   | 4.622531  | -0.477718 | -0.442951 |
| H                                                   | 4.273628  | -0.108827 | -1.324424 |
| H                                                   | 4.824066  | -1.458665 | -0.611621 |
| H                                                   | 3.970908  | -0.756534 | 1.515170  |
| C                                                   | 2.297569  | -1.132197 | 0.256739  |
| O                                                   | 2.119636  | -1.739958 | -0.781824 |
| O                                                   | 1.405303  | -1.034581 | 1.233142  |
| H                                                   | 0.475760  | -1.293753 | 0.908788  |
| H                                                   | 2.604074  | 1.210180  | 1.714479  |
| H                                                   | 4.164185  | 1.674305  | 1.013138  |
| S                                                   | 2.414947  | 1.984211  | -0.574450 |
| H                                                   | 1.211974  | 1.365929  | -0.471162 |
| C                                                   | -1.408962 | -0.475809 | -0.279315 |
| C                                                   | -2.844404 | -0.643476 | -0.856381 |
| O                                                   | -1.012466 | -1.446328 | 0.436511  |
| O                                                   | -0.799352 | 0.553906  | -0.592993 |
| H                                                   | -2.736508 | -1.013158 | -1.878512 |
| C                                                   | -3.663109 | 0.642582  | -0.873540 |
| N                                                   | -3.532224 | -1.727991 | -0.071268 |
| H                                                   | -4.212052 | -2.257962 | -0.617458 |
| H                                                   | -4.633550 | 0.479754  | -1.343744 |
| H                                                   | -3.117731 | 1.386958  | -1.448347 |
| S                                                   | -4.030571 | 1.306514  | 0.805373  |
| H                                                   | -2.787725 | -2.346456 | 0.285227  |
| H                                                   | -4.007948 | -1.319143 | 0.742485  |
| H                                                   | -2.754765 | 1.605226  | 1.126117  |
| 28                                                  |           |           |           |
| Dimer 161 of the n...z type                         |           |           |           |
| C                                                   | -3.298366 | 0.967426  | 0.591869  |
| C                                                   | -4.182729 | -0.278387 | 0.739208  |
| N                                                   | -3.938263 | 1.970339  | -0.249209 |
| H                                                   | -4.067366 | 1.590434  | -1.184062 |
| H                                                   | -3.322286 | 2.770479  | -0.356156 |
| H                                                   | -3.191410 | 1.384764  | 1.601331  |
| C                                                   | -1.869778 | 0.598253  | 0.153273  |
| O                                                   | -1.285534 | 1.166340  | -0.750711 |
| O                                                   | -1.355469 | -0.381269 | 0.881577  |
| H                                                   | -0.396994 | -0.602180 | 0.607440  |
| H                                                   | -3.769900 | -0.958195 | 1.480607  |
| H                                                   | -5.178267 | 0.029711  | 1.058667  |
| S                                                   | -4.454720 | -1.215079 | -0.830569 |
| H                                                   | -3.217875 | -1.746290 | -0.916571 |
| C                                                   | 2.024341  | -0.578561 | 0.840519  |
| C                                                   | 3.411302  | -1.062985 | 0.320107  |
| O                                                   | 1.034101  | -1.085947 | 0.226828  |
| O                                                   | 2.021746  | 0.209430  | 1.790889  |
| H                                                   | 3.720504  | -1.893465 | 0.958886  |
| C                                                   | 4.493530  | 0.009836  | 0.335315  |
| N                                                   | 3.208749  | -1.628552 | -1.059844 |
| H                                                   | 3.863996  | -2.373959 | -1.296686 |

| Nov 11, 22 15:56 dimers_structures.xyz Page 177/325 |           |           |           |
|-----------------------------------------------------|-----------|-----------|-----------|
| H                                                   | 5.454582  | -0.399981 | 0.022374  |
| H                                                   | 4.588992  | 0.384134  | 1.351584  |
| S                                                   | 4.156996  | 1.414908  | -0.808661 |
| H                                                   | 2.236434  | -1.971714 | -1.091416 |
| H                                                   | 3.293685  | -0.878519 | -1.757004 |
| H                                                   | 3.067545  | 1.873099  | -0.158355 |
| 28                                                  |           |           |           |
| Dimer 162 of the n...z type                         |           |           |           |
| C                                                   | 3.577707  | -0.885135 | 0.307846  |
| C                                                   | 3.833106  | 0.393228  | 1.119345  |
| N                                                   | 4.663888  | -1.138335 | -0.629443 |
| H                                                   | 4.710516  | -0.376874 | -1.302446 |
| H                                                   | 4.462045  | -1.974523 | -1.168998 |
| H                                                   | 3.553250  | -1.706759 | 1.034710  |
| C                                                   | 2.180133  | -0.867126 | -0.337566 |
| O                                                   | 1.989699  | -1.104888 | -1.516089 |
| O                                                   | 1.227618  | -0.581281 | 0.536156  |
| H                                                   | 0.295529  | -0.575052 | 0.113250  |
| H                                                   | 3.099793  | 0.496355  | 1.915625  |
| H                                                   | 4.828352  | 0.339799  | 1.560562  |
| S                                                   | 3.837625  | 1.947281  | 0.119435  |
| H                                                   | 2.507187  | 2.003835  | -0.095342 |
| C                                                   | -2.097503 | -0.924291 | 0.226461  |
| C                                                   | -3.500449 | -0.786436 | -0.436323 |
| O                                                   | -2.060145 | -1.502652 | 1.328862  |
| O                                                   | -1.146626 | -0.451464 | -0.448713 |
| H                                                   | -3.594944 | -1.597198 | -1.162154 |
| C                                                   | -3.744099 | 0.544150  | -1.139583 |
| N                                                   | -4.517022 | -1.043047 | 0.641672  |
| H                                                   | -5.366199 | -1.496946 | 0.304746  |
| H                                                   | -4.725225 | 0.558864  | -1.615630 |
| H                                                   | -2.983747 | 0.670815  | -1.906115 |
| S                                                   | -3.723037 | 1.995586  | -0.005121 |
| H                                                   | -4.039024 | -1.630049 | 1.345416  |
| H                                                   | -4.770503 | -0.160020 | 1.101098  |
| H                                                   | -2.416231 | 1.907489  | 0.317847  |
| 28                                                  |           |           |           |
| Dimer 163 of the n...z type                         |           |           |           |
| C                                                   | 2.892366  | 1.064444  | -0.430254 |
| C                                                   | 3.333144  | -0.408539 | -0.472981 |
| N                                                   | 3.199954  | 1.793126  | 0.803328  |
| H                                                   | 3.316989  | 1.154174  | 1.585957  |
| H                                                   | 4.036492  | 2.356782  | 0.715979  |
| H                                                   | 3.378863  | 1.569775  | -1.271211 |
| C                                                   | 1.389057  | 1.205117  | -0.711784 |
| O                                                   | 0.820359  | 0.629869  | -1.623370 |
| O                                                   | 0.755082  | 2.021550  | 0.113385  |
| H                                                   | 1.472156  | 2.329830  | 0.738505  |
| H                                                   | 2.959402  | -0.879996 | -1.380511 |
| H                                                   | 4.422219  | -0.450147 | -0.484626 |
| S                                                   | 2.837353  | -1.410511 | 0.992703  |
| H                                                   | 1.510536  | -1.529031 | 0.731545  |
| C                                                   | -1.153932 | -1.711745 | -0.170303 |
| C                                                   | -1.798343 | -0.294177 | -0.054241 |
| O                                                   | -1.375465 | -2.315438 | -1.245397 |
| O                                                   | -0.510776 | -2.090669 | 0.832626  |
| H                                                   | -1.136499 | 0.373178  | 0.493979  |
| C                                                   | -3.157215 | -0.387884 | 0.635249  |
| N                                                   | -1.934301 | 0.254681  | -1.442594 |
| H                                                   | -0.999802 | 0.584223  | -1.749110 |
| H                                                   | -3.016084 | -0.802128 | 1.631839  |
| H                                                   | -3.826565 | -1.049200 | 0.081708  |
| S                                                   | -4.057881 | 1.217363  | 0.755650  |
| H                                                   | -2.210313 | -0.523258 | -2.054828 |
| H                                                   | -2.612960 | 1.019605  | -1.490326 |
| H                                                   | -3.169623 | 1.836110  | 1.560248  |
| 28                                                  |           |           |           |
| Dimer 164 of the n...z type                         |           |           |           |
| C                                                   | 2.697203  | 0.710480  | -0.416193 |

| Nov 11, 22 15:56 dimers_structures.xyz Page 178/325 |           |           |           |
|-----------------------------------------------------|-----------|-----------|-----------|
| C                                                   | 3.103932  | -0.504421 | -1.260170 |
| N                                                   | 3.746113  | 1.322587  | 0.401689  |
| H                                                   | 4.428096  | 0.628941  | 0.699131  |
| H                                                   | 4.233652  | 2.057683  | -0.095999 |
| H                                                   | 2.313777  | 1.471003  | -1.106498 |
| C                                                   | 1.503582  | 0.389121  | 0.494424  |
| O                                                   | 0.567598  | -0.310012 | 0.145962  |
| O                                                   | 1.555873  | 0.960833  | 1.683647  |
| H                                                   | 2.435133  | 1.430297  | 1.689129  |
| H                                                   | 2.250215  | -0.870090 | -1.827979 |
| H                                                   | 3.885982  | -0.208787 | -1.959337 |
| S                                                   | 3.822328  | -1.894282 | -0.285326 |
| H                                                   | 2.673587  | -2.285528 | 0.303206  |
| C                                                   | -3.701166 | -1.243643 | -0.081992 |
| C                                                   | -2.958412 | 0.084650  | 0.304248  |
| O                                                   | -3.437109 | -2.235526 | 0.645813  |
| O                                                   | -4.484458 | -1.161169 | -1.045476 |
| H                                                   | -3.698899 | 0.750824  | 0.748779  |
| C                                                   | -2.300974 | 0.754646  | -0.895357 |
| N                                                   | -1.959529 | -0.256388 | 1.377343  |
| H                                                   | -1.968275 | 0.399698  | 2.155551  |
| H                                                   | -3.055474 | 0.906585  | -1.662718 |
| H                                                   | -1.514551 | 0.120822  | -1.307366 |
| S                                                   | -1.469002 | 2.357343  | -0.517200 |
| H                                                   | -2.245142 | -1.203443 | 1.690246  |
| H                                                   | -0.988180 | -0.309545 | 1.008018  |
| H                                                   | -2.589449 | 3.061179  | -0.256288 |
| 28                                                  |           |           |           |
| Dimer 165 of the n...z type                         |           |           |           |
| C                                                   | -3.178105 | 0.130183  | 0.743128  |
| C                                                   | -2.462834 | -1.228680 | 0.846523  |
| N                                                   | -4.382110 | 0.034867  | -0.069531 |
| H                                                   | -4.126502 | -0.219206 | -1.020645 |
| H                                                   | -4.829608 | 0.944238  | -0.131557 |
| H                                                   | -3.469150 | 0.401056  | 1.765175  |
| C                                                   | -2.184068 | 1.205911  | 0.278994  |
| O                                                   | -2.343920 | 1.891999  | -0.710237 |
| O                                                   | -1.126161 | 1.274049  | 1.081050  |
| H                                                   | -0.345791 | 1.733593  | 0.639741  |
| H                                                   | -1.657063 | -1.175487 | 1.575117  |
| H                                                   | -3.181128 | -1.982930 | 1.167585  |
| S                                                   | -1.777349 | -1.866189 | -0.747159 |
| H                                                   | -0.810969 | -0.930179 | -0.916923 |
| C                                                   | 1.518618  | 1.008742  | -0.653145 |
| C                                                   | 3.030370  | 0.646679  | -0.575050 |
| O                                                   | 1.162449  | 1.977944  | 0.082618  |
| O                                                   | 0.824004  | 0.324541  | -1.416621 |
| H                                                   | 3.533309  | 1.137565  | -1.411001 |
| C                                                   | 3.302657  | -0.852775 | -0.631110 |
| N                                                   | 3.580197  | 1.261013  | 0.684456  |
| H                                                   | 4.569764  | 1.502176  | 0.623497  |
| H                                                   | 4.373474  | -1.056375 | -0.594473 |
| H                                                   | 2.907555  | -1.238237 | -1.567637 |
| S                                                   | 2.566456  | -1.790540 | 0.775383  |
| H                                                   | 3.010408  | 2.099384  | 0.873631  |
| H                                                   | 3.444134  | 0.617926  | 1.473930  |
| H                                                   | 1.278445  | -1.605655 | 0.416995  |
| 28                                                  |           |           |           |
| Dimer 166 of the n...z type                         |           |           |           |
| C                                                   | 2.930773  | -1.220587 | -0.034033 |
| C                                                   | 3.453485  | -0.082288 | 0.858719  |
| N                                                   | 3.219355  | -1.098763 | -1.465494 |
| H                                                   | 3.390419  | -0.128691 | -1.719804 |
| H                                                   | 4.019555  | -1.653592 | -1.743140 |
| H                                                   | 3.367675  | -2.152353 | 0.340076  |
| C                                                   | 1.415373  | -1.400370 | 0.138066  |
| O                                                   | 0.862142  | -1.429133 | 1.224280  |
| O                                                   | 0.749911  | -1.531724 | -0.996048 |
| H                                                   | 1.459240  | -1.459789 | -1.697106 |

| Nov 11, 22 15:56 dimers_structures.xyz Page 179/325 |           |           |           |
|-----------------------------------------------------|-----------|-----------|-----------|
| H                                                   | 3.096763  | -0.221272 | 1.878022  |
| H                                                   | 4.543149  | -0.109054 | 0.866043  |
| S                                                   | 3.020379  | 1.612019  | 0.276559  |
| H                                                   | 1.676523  | 1.568948  | 0.495865  |
| C                                                   | -0.940449 | 1.324525  | -0.350873 |
| C                                                   | -1.945939 | 0.155065  | -0.113200 |
| O                                                   | -0.319449 | 1.725672  | 0.668241  |
| O                                                   | -0.877645 | 1.737594  | -1.522936 |
| H                                                   | -1.725181 | -0.644043 | -0.819617 |
| C                                                   | -3.384184 | 0.640894  | -0.278992 |
| N                                                   | -1.728579 | -0.405756 | 1.261112  |
| H                                                   | -0.823952 | -0.920768 | 1.300026  |
| H                                                   | -3.497072 | 1.050773  | -1.280026 |
| H                                                   | -3.610660 | 1.430619  | 0.440706  |
| S                                                   | -4.666725 | -0.652720 | 0.013206  |
| H                                                   | -1.649286 | 0.367735  | 1.926963  |
| H                                                   | -2.495331 | -1.028257 | 1.532135  |
| H                                                   | -4.339779 | -1.440119 | -1.032122 |
| 28                                                  |           |           |           |
| Dimer 167 of the n...z type                         |           |           |           |
| C                                                   | 2.637144  | 1.092218  | -0.683859 |
| C                                                   | 2.381448  | -0.208574 | -1.464368 |
| N                                                   | 3.863407  | 1.126723  | 0.118084  |
| H                                                   | 4.190555  | 0.185995  | 0.324455  |
| H                                                   | 4.607376  | 1.637597  | -0.340810 |
| H                                                   | 2.662597  | 1.908459  | -1.413084 |
| C                                                   | 1.450017  | 1.422596  | 0.233252  |
| O                                                   | 0.291092  | 1.404149  | -0.146305 |
| O                                                   | 1.787760  | 1.747948  | 1.466761  |
| H                                                   | 2.785572  | 1.681943  | 1.462320  |
| H                                                   | 1.396500  | -0.171921 | -1.927688 |
| H                                                   | 3.130786  | -0.304052 | -2.250154 |
| S                                                   | 2.534449  | -1.749119 | -0.464042 |
| H                                                   | 1.413909  | -1.602215 | 0.297536  |
| C                                                   | -1.221531 | -1.687954 | 0.650109  |
| C                                                   | -2.304203 | -0.562888 | 0.616597  |
| O                                                   | -0.240964 | -1.481081 | 1.411218  |
| O                                                   | -1.454930 | -2.670129 | -0.078107 |
| H                                                   | -3.207621 | -0.945390 | 1.095203  |
| C                                                   | -2.609337 | -0.111707 | -0.808683 |
| N                                                   | -1.829375 | 0.599457  | 1.442654  |
| H                                                   | -1.489413 | 0.260980  | 2.344079  |
| H                                                   | -2.921748 | -0.978590 | -1.384676 |
| H                                                   | -1.714846 | 0.306721  | -1.272939 |
| S                                                   | -3.886538 | 1.214737  | -0.934642 |
| H                                                   | -1.022174 | 1.056155  | 0.965993  |
| H                                                   | -2.569758 | 1.289833  | 1.581573  |
| H                                                   | -4.931413 | 0.472095  | -0.514851 |
| 28                                                  |           |           |           |
| Dimer 168 of the n...z type                         |           |           |           |
| C                                                   | -3.155888 | -0.759552 | -0.566649 |
| C                                                   | -3.649028 | 0.563819  | -1.166931 |
| N                                                   | -4.068778 | -1.441954 | 0.352621  |
| H                                                   | -4.651199 | -0.773919 | 0.851865  |
| H                                                   | -4.673347 | -2.095821 | -0.129674 |
| H                                                   | -2.942725 | -1.435612 | -1.402743 |
| C                                                   | -1.804722 | -0.586292 | 0.142332  |
| O                                                   | -0.912894 | 0.129652  | -0.280483 |
| O                                                   | -1.674021 | -1.299739 | 1.246319  |
| H                                                   | -2.560758 | -1.741881 | 1.356535  |
| H                                                   | -2.898767 | 0.974781  | -1.840173 |
| H                                                   | -4.561944 | 0.381258  | -1.733655 |
| S                                                   | -4.100300 | 1.839081  | 0.085478  |
| H                                                   | -2.843371 | 2.115855  | 0.488713  |
| C                                                   | 2.648070  | -1.712488 | -0.322984 |
| C                                                   | 2.544113  | -0.151693 | -0.259697 |
| O                                                   | 2.284305  | -2.316870 | 0.716443  |
| O                                                   | 3.113773  | -2.170575 | -1.384142 |
| H                                                   | 2.101023  | 0.227178  | -1.179504 |

| Nov 11, 22 15:56 dimers_structures.xyz Page 180/325 |           |           |           |
|-----------------------------------------------------|-----------|-----------|-----------|
| C                                                   | 3.935987  | 0.445155  | -0.052153 |
| N                                                   | 1.628704  | 0.206430  | 0.871207  |
| H                                                   | 0.638700  | 0.208059  | 0.546955  |
| H                                                   | 4.565320  | 0.156789  | -0.891266 |
| H                                                   | 4.388107  | 0.056954  | 0.863094  |
| S                                                   | 3.965780  | 2.278548  | 0.146653  |
| H                                                   | 1.727567  | -0.543124 | 1.571190  |
| H                                                   | 1.850923  | 1.122745  | 1.269314  |
| H                                                   | 3.492808  | 2.579879  | -1.080141 |
| 28                                                  |           |           |           |
| Dimer 169 of the n...z type                         |           |           |           |
| C                                                   | 2.718210  | -0.975525 | 0.439854  |
| C                                                   | 3.687896  | 0.083113  | 0.989983  |
| N                                                   | 3.367146  | -1.824007 | -0.547782 |
| H                                                   | 3.641006  | -1.262115 | -1.349992 |
| H                                                   | 2.708820  | -2.513388 | -0.897255 |
| H                                                   | 2.431042  | -1.597999 | 1.295912  |
| C                                                   | 1.417468  | -0.320800 | -0.048603 |
| O                                                   | 0.985732  | -0.445546 | -1.179745 |
| O                                                   | 0.816785  | 0.377994  | 0.906450  |
| H                                                   | -0.023488 | 0.826660  | 0.567793  |
| H                                                   | 3.229624  | 0.633370  | 1.808809  |
| H                                                   | 4.582836  | -0.417703 | 1.358914  |
| S                                                   | 4.303617  | 1.289668  | -0.265547 |
| H                                                   | 3.158787  | 1.990361  | -0.399360 |
| C                                                   | -2.489054 | 1.438664  | -0.164913 |
| C                                                   | -3.222755 | 0.393432  | 0.734905  |
| O                                                   | -3.197791 | 2.007244  | -1.018226 |
| O                                                   | -1.276602 | 1.644133  | 0.090329  |
| H                                                   | -3.465606 | 0.903415  | 1.669958  |
| C                                                   | -2.445368 | -0.879665 | 1.053227  |
| N                                                   | -4.527739 | 0.083447  | 0.053484  |
| H                                                   | -5.297519 | -0.097645 | 0.697584  |
| H                                                   | -3.017016 | -1.512464 | 1.733544  |
| H                                                   | -1.514270 | -0.614919 | 1.548270  |
| S                                                   | -2.093437 | -1.933763 | -0.416179 |
| H                                                   | -4.724981 | 0.905603  | -0.543817 |
| H                                                   | -4.413502 | -0.726956 | -0.567114 |
| H                                                   | -1.157834 | -1.132685 | -0.972740 |
| 28                                                  |           |           |           |
| Dimer 170 of the n...z type                         |           |           |           |
| C                                                   | -2.755807 | 0.211586  | 1.077952  |
| C                                                   | -3.234301 | -1.125098 | 0.494580  |
| N                                                   | -3.879443 | 1.080365  | 1.399695  |
| H                                                   | -4.393689 | 1.296004  | 0.548783  |
| H                                                   | -3.537106 | 1.968248  | 1.753954  |
| H                                                   | -2.233540 | -0.033558 | 2.012027  |
| C                                                   | -1.689728 | 0.872552  | 0.188389  |
| O                                                   | -1.692689 | 2.051476  | -0.101497 |
| O                                                   | -0.754748 | 0.010040  | -0.202817 |
| H                                                   | -0.014525 | 0.461427  | -0.716119 |
| H                                                   | -2.406563 | -1.824218 | 0.402664  |
| H                                                   | -3.983090 | -1.552006 | 1.161557  |
| S                                                   | -4.074293 | -0.986517 | -1.144494 |
| H                                                   | -2.963842 | -0.744503 | -1.870739 |
| C                                                   | 2.347924  | 1.105120  | -0.614736 |
| C                                                   | 3.546558  | 0.107897  | -0.625581 |
| O                                                   | 2.452956  | 2.088399  | 0.141830  |
| O                                                   | 1.403027  | 0.802723  | -1.389491 |
| H                                                   | 4.135568  | 0.309143  | -1.523020 |
| C                                                   | 3.132515  | -1.361370 | -0.616676 |
| N                                                   | 4.411148  | 0.446619  | 0.557788  |
| H                                                   | 5.406438  | 0.290328  | 0.399605  |
| H                                                   | 4.005762  | -2.010910 | -0.687611 |
| H                                                   | 2.493782  | -1.541799 | -1.477612 |
| S                                                   | 2.259521  | -1.884756 | 0.921325  |
| H                                                   | 4.220109  | 1.439125  | 0.772258  |
| H                                                   | 4.112207  | -0.101861 | 1.373672  |
| H                                                   | 1.121577  | -1.189164 | 0.711136  |

| Nov 11, 22 15:56       | dimers_structures.xyz         | Page 181/325 |
|------------------------|-------------------------------|--------------|
| 28                     |                               |              |
| Dimer 171 of the n...z | type                          |              |
| C                      | 3.183279 -0.902455 0.664912   |              |
| C                      | 3.065155 0.535374 1.191012    |              |
| N                      | 4.232848 -1.146541 -0.327214  |              |
| H                      | 4.437054 -0.304990 -0.860413  |              |
| H                      | 5.091253 -1.472899 0.099439   |              |
| H                      | 3.362897 -1.552495 1.528367   |              |
| C                      | 1.847243 -1.382979 0.079382   |              |
| O                      | 0.769917 -1.150856 0.600367   |              |
| O                      | 1.958965 -2.078835 -1.037598  |              |
| H                      | 2.938547 -2.075018 -1.226906  |              |
| H                      | 2.262238 0.602445 1.923025    |              |
| H                      | 4.000727 0.818873 1.672846    |              |
| S                      | 2.789091 1.798024 -0.124430   |              |
| H                      | 1.504860 1.477018 -0.393233   |              |
| C                      | -3.827846 -0.894279 0.353815  |              |
| C                      | -2.494238 -0.082373 0.192654  |              |
| O                      | -3.905930 -1.941113 -0.340000 |              |
| O                      | -4.652833 -0.413248 1.151264  |              |
| H                      | -1.982969 -0.076723 1.155367  |              |
| C                      | -2.763921 1.346010 -0.265300  |              |
| N                      | -1.622218 -0.833689 -0.774135 |              |
| H                      | -0.728060 -1.125032 -0.333899 |              |
| H                      | -3.435665 1.815964 0.448875   |              |
| H                      | -3.250922 1.354131 -1.243043  |              |
| S                      | -1.253306 2.385729 -0.471261  |              |
| H                      | -2.197752 -1.658985 -1.035171 |              |
| H                      | -1.394988 -0.292476 -1.608586 |              |
| H                      | -0.873170 2.368382 0.822728   |              |
| 28                     |                               |              |
| Dimer 172 of the n...z | type                          |              |
| C                      | -3.013766 0.760874 0.656506   |              |
| C                      | -2.401902 -0.439733 1.392986  |              |
| N                      | -4.293485 0.530479 -0.016592  |              |
| H                      | -4.388625 -0.442535 -0.297234 |              |
| H                      | -5.081303 0.773125 0.571582   |              |
| H                      | -3.148058 1.558722 1.395161   |              |
| C                      | -2.023536 1.339528 -0.367813  |              |
| O                      | -0.833906 1.465457 -0.140629  |              |
| O                      | -2.574513 1.704453 -1.511464  |              |
| H                      | -3.534675 1.456659 -1.405923  |              |
| H                      | -1.447306 -0.160026 1.835318  |              |
| H                      | -3.075417 -0.756336 2.189202  |              |
| S                      | -2.168383 -1.936273 0.341397  |              |
| H                      | -1.198412 -1.434116 -0.449558 |              |
| C                      | 3.106579 1.305460 0.627983    |              |
| C                      | 2.131829 0.197259 0.104209    |              |
| O                      | 3.451561 2.163000 -0.224248   |              |
| O                      | 3.450056 1.191174 1.819373    |              |
| H                      | 1.291886 0.094934 0.788747    |              |
| C                      | 2.878732 -1.128282 -0.031524  |              |
| N                      | 1.585475 0.659987 -1.215711   |              |
| H                      | 0.672218 1.122925 -1.070240   |              |
| H                      | 3.271895 -1.402991 0.944738   |              |
| H                      | 3.719043 -1.029894 -0.722177  |              |
| S                      | 1.866817 -2.514032 -0.706807  |              |
| H                      | 2.264812 1.356697 -1.564927   |              |
| H                      | 1.454208 -0.108047 -1.878247  |              |
| H                      | 0.967667 -2.560801 0.297894   |              |
| 28                     |                               |              |
| Dimer 173 of the n...z | type                          |              |
| C                      | 2.847322 -1.329995 -0.078543  |              |
| C                      | 3.480349 -0.400633 0.966279   |              |
| N                      | 3.325019 -1.186146 -1.455347  |              |
| H                      | 3.642849 -0.236465 -1.633887  |              |
| H                      | 4.084013 -1.823651 -1.662824  |              |
| H                      | 3.033352 -2.359548 0.246891   |              |
| C                      | 1.316744 -1.194770 -0.085285  |              |

| Nov 11, 22 15:56       | dimers_structures.xyz         | Page 182/325 |
|------------------------|-------------------------------|--------------|
| O                      | 0.652512 -1.076817 0.928602   |              |
| O                      | 0.774383 -1.230577 -1.290328  |              |
| H                      | 1.557962 -1.291686 -1.905729  |              |
| H                      | 3.039949 -0.584269 1.944759   |              |
| H                      | 4.550369 -0.599978 1.022882   |              |
| S                      | 3.342577 1.393124 0.563495    |              |
| H                      | 2.004909 1.495495 0.715865    |              |
| C                      | -3.883429 -0.542281 0.026861  |              |
| C                      | -2.743630 0.485294 0.364427   |              |
| O                      | -3.954475 -1.533391 0.799403  |              |
| O                      | -4.599460 -0.251087 -0.947655 |              |
| H                      | -3.225299 1.383392 0.752457   |              |
| C                      | -1.898168 0.827199 -0.854513  |              |
| N                      | -1.929167 -0.107040 1.482467  |              |
| H                      | -1.772954 0.542423 2.250995   |              |
| H                      | -2.559934 1.189340 -1.637229  |              |
| H                      | -1.375976 -0.054185 -1.229116 |              |
| S                      | -0.565500 2.066390 -0.550800  |              |
| H                      | -2.507780 -0.911227 1.797653  |              |
| H                      | -1.004924 -0.470339 1.176484  |              |
| H                      | -1.369543 3.086870 -0.187714  |              |
| 28                     |                               |              |
| Dimer 174 of the n...z | type                          |              |
| C                      | -2.971324 -0.930255 0.076873  |              |
| C                      | -3.207977 0.145527 -0.999389  |              |
| N                      | -3.638432 -0.585276 1.322454  |              |
| H                      | -3.214707 0.251841 1.714424   |              |
| H                      | -3.499225 -1.321889 2.007247  |              |
| H                      | -3.414129 -1.853576 -0.312626 |              |
| C                      | -1.466048 -1.193801 0.217244  |              |
| O                      | -0.833418 -0.950639 1.228279  |              |
| O                      | -0.939442 -1.685540 -0.896593 |              |
| H                      | 0.063333 -1.747023 -0.838028  |              |
| H                      | -2.795335 -0.173801 -1.954254 |              |
| H                      | -4.281286 0.297701 -1.112312  |              |
| S                      | -2.536907 1.816818 -0.588630  |              |
| H                      | -1.227701 1.525013 -0.739105  |              |
| C                      | 2.431387 -1.242280 -0.086591  |              |
| C                      | 3.143957 0.114526 -0.377641   |              |
| O                      | 1.661615 -1.649759 -1.012979  |              |
| O                      | 2.698398 -1.779861 0.990919   |              |
| H                      | 4.200463 -0.098319 -0.548576  |              |
| C                      | 3.012556 1.117796 0.767364    |              |
| N                      | 2.584077 0.668329 -1.660698   |              |
| H                      | 3.278482 1.130579 -2.247151   |              |
| H                      | 3.635161 1.995458 0.589731    |              |
| H                      | 3.344603 0.632580 1.682177    |              |
| S                      | 1.303086 1.773394 0.988242    |              |
| H                      | 2.155435 -0.134550 -2.150337  |              |
| H                      | 1.827621 1.331985 -1.447264   |              |
| H                      | 0.696372 0.596551 1.265821    |              |
| 28                     |                               |              |
| Dimer 175 of the n...z | type                          |              |
| C                      | -2.957216 0.635609 0.711819   |              |
| C                      | -3.497242 -0.737808 1.131030  |              |
| N                      | -3.901713 1.538510 0.051515   |              |
| H                      | -4.588990 1.017059 -0.487416  |              |
| H                      | -4.393068 2.124186 0.715807   |              |
| H                      | -2.590725 1.129583 1.619196   |              |
| C                      | -1.713657 0.506904 -0.180535  |              |
| O                      | -0.853782 -0.340545 -0.011693 |              |
| O                      | -1.633886 1.414588 -1.136920  |              |
| H                      | -2.481448 1.931913 -1.053602  |              |
| H                      | -2.715052 -1.317178 1.618476  |              |
| H                      | -4.317124 -0.598882 1.835626  |              |
| S                      | -4.208105 -1.726188 -0.252989 |              |
| H                      | -3.038278 -2.011893 -0.860481 |              |
| C                      | 2.486794 1.714785 0.242590    |              |
| C                      | 2.447122 0.150605 0.184832    |              |

| Nov 11, 22 15:56 dimers_structures.xyz Page 183/325 |           |           |           |
|-----------------------------------------------------|-----------|-----------|-----------|
| O                                                   | 2.251036  | 2.297777  | -0.845124 |
| O                                                   | 2.781962  | 2.197593  | 1.352482  |
| H                                                   | 1.883039  | -0.235137 | 1.032597  |
| C                                                   | 3.873068  | -0.398556 | 0.197474  |
| N                                                   | 1.719060  | -0.245518 | -1.064018 |
| H                                                   | 0.700664  | -0.310386 | -0.862941 |
| H                                                   | 4.357269  | -0.080072 | 1.118063  |
| H                                                   | 4.445680  | -0.003110 | -0.644042 |
| S                                                   | 3.993533  | -2.231539 | 0.031921  |
| H                                                   | 1.866411  | 0.521639  | -1.736923 |
| H                                                   | 2.044357  | -1.141520 | -1.436223 |
| H                                                   | 3.343130  | -2.538052 | 1.173252  |
| 28                                                  |           |           |           |
| Dimer 176 of the n...z type                         |           |           |           |
| C                                                   | -2.833138 | -1.329974 | 0.098015  |
| C                                                   | -3.431094 | -0.430640 | -0.992867 |
| N                                                   | -3.338105 | -1.131537 | 1.458222  |
| H                                                   | -3.652078 | -0.173728 | 1.595120  |
| H                                                   | -4.106167 | -1.755511 | 1.673299  |
| H                                                   | -3.024337 | -2.368252 | -0.195078 |
| C                                                   | -1.301844 | -1.209902 | 0.132305  |
| O                                                   | -0.616356 | -1.136606 | -0.871812 |
| O                                                   | -0.784474 | -1.204219 | 1.348424  |
| H                                                   | -1.580725 | -1.234829 | 1.949692  |
| H                                                   | -2.974847 | -0.657848 | -1.954794 |
| H                                                   | -4.502988 | -0.614836 | -1.063296 |
| S                                                   | -3.270371 | 1.374294  | -0.653423 |
| H                                                   | -1.926717 | 1.446461  | -0.767142 |
| C                                                   | 3.817133  | -0.596231 | -0.067419 |
| C                                                   | 2.725631  | 0.497395  | -0.345754 |
| O                                                   | 3.891648  | -1.506507 | -0.932695 |
| O                                                   | 4.503550  | -0.424938 | 0.956334  |
| H                                                   | 3.249495  | 1.385174  | -0.703629 |
| C                                                   | 1.901335  | 0.835153  | 0.888357  |
| N                                                   | 1.874702  | 0.002106  | -1.482552 |
| H                                                   | 1.629922  | 0.734029  | -2.147159 |
| H                                                   | 2.577677  | 1.169149  | 1.670903  |
| H                                                   | 1.364056  | -0.041089 | 1.253000  |
| S                                                   | 0.589755  | 2.104500  | 0.617110  |
| H                                                   | 2.455582  | -0.728287 | -1.932389 |
| H                                                   | 0.993640  | -0.446751 | -1.162624 |
| H                                                   | 1.408098  | 3.114978  | 0.257587  |
| 28                                                  |           |           |           |
| Dimer 177 of the n...z type                         |           |           |           |
| C                                                   | 2.728038  | -1.269214 | 0.388187  |
| C                                                   | 3.457690  | 0.052938  | 0.665780  |
| N                                                   | 3.028159  | -1.925352 | -0.886111 |
| H                                                   | 3.286616  | -1.244842 | -1.596535 |
| H                                                   | 3.778688  | -2.599637 | -0.798976 |
| H                                                   | 2.986352  | -1.957693 | 1.200441  |
| C                                                   | 1.205412  | -1.102722 | 0.493572  |
| O                                                   | 0.660445  | -0.429789 | 1.351461  |
| O                                                   | 0.519988  | -1.765299 | -0.422341 |
| H                                                   | 1.222547  | -2.186613 | -0.992476 |
| H                                                   | 3.144295  | 0.460851  | 1.625131  |
| H                                                   | 4.530877  | -0.133612 | 0.701036  |
| S                                                   | 3.233947  | 1.334794  | -0.640565 |
| H                                                   | 1.958112  | 1.660061  | -0.345792 |
| C                                                   | -3.446974 | -0.780673 | -0.448382 |
| C                                                   | -2.716732 | 0.424654  | 0.243451  |
| O                                                   | -3.527041 | -1.827792 | 0.244807  |
| O                                                   | -3.883513 | -0.558668 | -1.592383 |
| H                                                   | -3.477090 | 1.165170  | 0.493700  |
| C                                                   | -1.649634 | 1.045161  | -0.649109 |
| N                                                   | -2.140687 | -0.085876 | 1.537650  |
| H                                                   | -2.331758 | 0.524252  | 2.329811  |
| H                                                   | -2.113391 | 1.353014  | -1.582549 |
| H                                                   | -0.876264 | 0.313964  | -0.885166 |
| S                                                   | -0.764181 | 2.478653  | 0.102413  |

| Nov 11, 22 15:56 dimers_structures.xyz Page 184/325 |           |           |           |
|-----------------------------------------------------|-----------|-----------|-----------|
| H                                                   | -2.602856 | -1.006912 | 1.664352  |
| H                                                   | -1.113232 | -0.240006 | 1.483959  |
| H                                                   | -1.747277 | 3.386962  | -0.060627 |
| 28                                                  |           |           |           |
| Dimer 178 of the n...z type                         |           |           |           |
| C                                                   | -2.895971 | -0.434453 | -0.757111 |
| C                                                   | -2.206176 | 0.931229  | -0.648733 |
| N                                                   | -4.310894 | -0.469835 | -0.375275 |
| H                                                   | -4.516883 | 0.232364  | 0.331128  |
| H                                                   | -4.921396 | -0.314674 | -1.168383 |
| H                                                   | -2.813664 | -0.758840 | -1.800763 |
| C                                                   | -2.160141 | -1.522721 | 0.044924  |
| O                                                   | -0.947694 | -1.633213 | 0.098678  |
| O                                                   | -2.963111 | -2.365724 | 0.667193  |
| H                                                   | -3.876974 | -2.013620 | 0.472243  |
| H                                                   | -1.183533 | 0.896923  | -1.019805 |
| H                                                   | -2.756771 | 1.649708  | -1.256603 |
| S                                                   | -2.203645 | 1.642685  | 1.051735  |
| H                                                   | -1.292189 | 0.799177  | 1.577235  |
| C                                                   | 1.568913  | 1.677590  | -0.242235 |
| C                                                   | 2.043979  | 0.220676  | 0.078421  |
| O                                                   | 1.043964  | 1.834025  | -1.373775 |
| O                                                   | 1.794142  | 2.516681  | 0.649118  |
| H                                                   | 1.666532  | -0.081967 | 1.054389  |
| C                                                   | 3.571099  | 0.158900  | 0.054245  |
| N                                                   | 1.451268  | -0.699424 | -0.946749 |
| H                                                   | 0.512684  | -1.027948 | -0.649140 |
| H                                                   | 3.955810  | 0.835209  | 0.814120  |
| H                                                   | 3.954489  | 0.482349  | -0.915823 |
| S                                                   | 4.276106  | -1.526668 | 0.302714  |
| H                                                   | 1.331381  | -0.140045 | -1.803351 |
| H                                                   | 2.044679  | -1.517495 | -1.111832 |
| H                                                   | 3.805221  | -1.714079 | 1.552802  |
| 28                                                  |           |           |           |
| Dimer 179 of the n...z type                         |           |           |           |
| C                                                   | 2.824644  | -1.168672 | 0.146192  |
| C                                                   | 2.539753  | -0.382454 | 1.432336  |
| N                                                   | 4.085464  | -0.865075 | -0.534001 |
| H                                                   | 4.351141  | 0.106546  | -0.391355 |
| H                                                   | 4.842298  | -1.454728 | -0.209314 |
| H                                                   | 2.828371  | -2.231891 | 0.412886  |
| C                                                   | 1.682989  | -1.041811 | -0.877156 |
| O                                                   | 0.501056  | -1.037831 | -0.584532 |
| O                                                   | 2.091672  | -0.977534 | -2.131791 |
| H                                                   | 3.086221  | -0.969458 | -2.061635 |
| H                                                   | 1.588058  | -0.691175 | 1.861420  |
| H                                                   | 3.322424  | -0.598656 | 2.159406  |
| S                                                   | 2.563599  | 1.449433  | 1.231273  |
| H                                                   | 1.411659  | 1.565112  | 0.532838  |
| C                                                   | -3.737024 | -0.789534 | 0.309285  |
| C                                                   | -2.618435 | 0.309253  | 0.405789  |
| O                                                   | -3.559867 | -1.794258 | 1.046242  |
| O                                                   | -4.680504 | -0.532835 | -0.459309 |
| H                                                   | -3.038366 | 1.146363  | 0.965297  |
| C                                                   | -2.134524 | 0.776911  | -0.959656 |
| N                                                   | -1.503961 | -0.267425 | 1.238447  |
| H                                                   | -1.939438 | -1.097307 | 1.686720  |
| H                                                   | -2.993584 | 1.125337  | -1.527040 |
| H                                                   | -1.666704 | -0.042972 | -1.505754 |
| S                                                   | -0.848487 | 2.097678  | -0.909095 |
| H                                                   | -0.708657 | -0.589811 | 0.659377  |
| H                                                   | -1.152874 | 0.381765  | 1.939825  |
| H                                                   | -1.606137 | 3.042100  | -0.314260 |
| 28                                                  |           |           |           |
| Dimer 180 of the n...z type                         |           |           |           |
| C                                                   | 2.068460  | -0.595580 | -0.314030 |
| C                                                   | 1.864602  | 0.929273  | -0.387044 |
| N                                                   | 1.365390  | -1.177030 | 0.829768  |
| H                                                   | 1.797921  | -0.851538 | 1.692686  |

| Nov 11, 22 15:56 dimers_structures.xyz Page 185/325 |           |           |           |
|-----------------------------------------------------|-----------|-----------|-----------|
| H                                                   | 1.469329  | -2.188319 | 0.825398  |
| H                                                   | 1.638196  | -1.011113 | -1.230858 |
| C                                                   | 3.556661  | -0.948648 | -0.328803 |
| O                                                   | 4.143085  | -1.504108 | 0.568955  |
| O                                                   | 4.143024  | -0.551593 | -1.471124 |
| H                                                   | 5.085842  | -0.781780 | -1.440482 |
| H                                                   | 2.353736  | 1.329011  | -1.273073 |
| H                                                   | 0.798416  | 1.148672  | -0.454263 |
| S                                                   | 2.442422  | 1.859038  | 1.095349  |
| H                                                   | 3.766864  | 1.764540  | 0.856211  |
| C                                                   | -1.999695 | 0.669594  | -1.101576 |
| C                                                   | -2.035153 | -0.684137 | -0.316985 |
| O                                                   | -1.542637 | 1.654335  | -0.464913 |
| O                                                   | -2.439253 | 0.621137  | -2.265128 |
| H                                                   | -1.444169 | -1.415715 | -0.871002 |
| C                                                   | -3.453594 | -1.232603 | -0.174961 |
| N                                                   | -1.365128 | -0.463935 | 1.007175  |
| H                                                   | -0.346864 | -0.772188 | 0.974169  |
| H                                                   | -3.445249 | -2.202729 | 0.325012  |
| H                                                   | -3.867426 | -1.365575 | -1.172673 |
| S                                                   | -4.594509 | -0.188199 | 0.828335  |
| H                                                   | -1.368691 | 0.560380  | 1.142898  |
| H                                                   | -1.835744 | -0.921195 | 1.787731  |
| H                                                   | -4.612055 | 0.875315  | -0.001234 |
| 28                                                  |           |           |           |
| Dimer 181 of the n...z type                         |           |           |           |
| C                                                   | 1.930639  | -0.135284 | -0.826795 |
| C                                                   | 1.499320  | 1.215597  | -0.233017 |
| N                                                   | 0.937606  | -1.172399 | -0.559817 |
| H                                                   | 0.770016  | -1.245276 | 0.442196  |
| H                                                   | 1.286343  | -2.079031 | -0.860183 |
| H                                                   | 1.997780  | 0.008458  | -1.911981 |
| C                                                   | 3.336268  | -0.535155 | -0.372482 |
| O                                                   | 3.623993  | -1.594830 | 0.131241  |
| O                                                   | 4.230758  | 0.438838  | -0.617910 |
| H                                                   | 5.108550  | 0.141147  | -0.329506 |
| H                                                   | 2.186647  | 1.999652  | -0.542639 |
| H                                                   | 0.499589  | 1.463122  | -0.592155 |
| S                                                   | 1.361304  | 1.234223  | 1.606813  |
| H                                                   | 2.683602  | 1.247444  | 1.874855  |
| C                                                   | -2.512979 | 1.201737  | -0.495161 |
| C                                                   | -2.735417 | -0.270514 | -0.974452 |
| O                                                   | -1.666405 | 1.855540  | -1.154300 |
| O                                                   | -3.221654 | 1.574081  | 0.460855  |
| H                                                   | -3.587643 | -0.242038 | -1.660499 |
| C                                                   | -3.069597 | -1.270752 | 0.125325  |
| N                                                   | -1.551243 | -0.681873 | -1.799441 |
| H                                                   | -1.753259 | -1.483520 | -2.396462 |
| H                                                   | -3.130345 | -2.283562 | -0.276959 |
| H                                                   | -4.045460 | -1.009988 | 0.528881  |
| S                                                   | -1.869406 | -1.365445 | 1.520144  |
| H                                                   | -1.308208 | 0.126266  | -2.381957 |
| H                                                   | -0.667687 | -0.895295 | -1.235944 |
| H                                                   | -2.037777 | -0.090728 | 1.926246  |
| 28                                                  |           |           |           |
| Dimer 182 of the n...z type                         |           |           |           |
| C                                                   | 2.848688  | 0.745066  | -0.595587 |
| C                                                   | 2.653407  | -0.609291 | -1.299046 |
| N                                                   | 3.733908  | 0.744080  | 0.572509  |
| H                                                   | 3.816474  | -0.192393 | 0.961806  |
| H                                                   | 4.660761  | 1.084812  | 0.349012  |
| C                                                   | 3.245226  | 1.441044  | -1.342221 |
| C                                                   | 1.497388  | 1.351684  | -0.184464 |
| O                                                   | 0.530908  | 1.407918  | -0.920074 |
| O                                                   | 1.475024  | 1.840370  | 1.049819  |
| H                                                   | 2.388969  | 1.643521  | 1.400673  |
| H                                                   | 1.866916  | -0.518904 | -2.046831 |
| H                                                   | 3.579479  | -0.888129 | -1.801938 |
| S                                                   | 2.283532  | -2.022656 | -0.174707 |

| Nov 11, 22 15:56 dimers_structures.xyz Page 186/325 |           |           |           |
|-----------------------------------------------------|-----------|-----------|-----------|
| H                                                   | 1.113159  | -1.564705 | 0.357780  |
| C                                                   | -1.587825 | -1.079080 | 1.029282  |
| C                                                   | -2.471683 | 0.210383  | 1.072530  |
| O                                                   | -0.397882 | -0.911668 | 1.405171  |
| O                                                   | -2.154228 | -2.122701 | 0.659559  |
| H                                                   | -2.953798 | 0.234119  | 2.053870  |
| C                                                   | -3.553935 | 0.284466  | 0.003676  |
| N                                                   | -1.553983 | 1.398217  | 1.025169  |
| H                                                   | -2.014856 | 2.270148  | 1.286518  |
| H                                                   | -4.134164 | 1.204005  | 0.096896  |
| H                                                   | -4.225533 | -0.559164 | 0.144840  |
| S                                                   | -2.925350 | 0.270422  | -1.727577 |
| H                                                   | -0.764342 | 1.217328  | 1.655983  |
| H                                                   | -1.117423 | 1.506906  | 0.091689  |
| H                                                   | -2.398064 | -0.969656 | -1.669425 |
| 28                                                  |           |           |           |
| Dimer 183 of the n...z type                         |           |           |           |
| C                                                   | 2.078351  | 0.314541  | -0.980126 |
| C                                                   | 2.054646  | -1.051996 | -0.285421 |
| N                                                   | 3.386982  | 0.775057  | -1.454045 |
| H                                                   | 4.134213  | 0.426628  | -0.858330 |
| H                                                   | 3.570873  | 0.475307  | -2.404007 |
| H                                                   | 1.406226  | 0.250048  | -1.843852 |
| C                                                   | 1.472234  | 1.425907  | -0.106075 |
| O                                                   | 0.490547  | 1.283135  | 0.601632  |
| O                                                   | 2.092388  | 2.587133  | -0.208191 |
| H                                                   | 2.860956  | 2.396561  | -0.815418 |
| H                                                   | 1.037466  | -1.365885 | -0.058434 |
| H                                                   | 2.484767  | -1.792328 | -0.960547 |
| S                                                   | 3.080249  | -1.142035 | 1.243687  |
| H                                                   | 2.272457  | -0.393359 | 2.022033  |
| C                                                   | -1.822670 | -1.946926 | -0.555921 |
| C                                                   | -2.402791 | -0.729427 | 0.244104  |
| O                                                   | -0.946260 | -2.614004 | 0.051327  |
| O                                                   | -2.312042 | -2.133297 | -1.684936 |
| H                                                   | -3.374622 | -1.035292 | 0.635904  |
| C                                                   | -2.544015 | 0.530411  | -0.599576 |
| N                                                   | -1.509544 | -0.494799 | 1.431512  |
| H                                                   | -1.122647 | -1.414908 | 1.682774  |
| H                                                   | -3.177970 | 0.307962  | -1.453590 |
| H                                                   | -1.571005 | 0.853709  | -0.972246 |
| S                                                   | -3.211627 | 1.988072  | 0.313771  |
| H                                                   | -0.711632 | 0.116300  | 1.174564  |
| H                                                   | -1.999600 | -0.072474 | 2.219318  |
| H                                                   | -4.461083 | 1.510551  | 0.489667  |
| 28                                                  |           |           |           |
| Dimer 184 of the n...z type                         |           |           |           |
| C                                                   | -2.374372 | -0.652203 | 0.581931  |
| C                                                   | -2.055479 | 0.835713  | 0.817883  |
| N                                                   | -1.347809 | -1.303064 | -0.229241 |
| H                                                   | -1.360220 | -0.912275 | -1.169818 |
| H                                                   | -1.560573 | -2.292098 | -0.330821 |
| H                                                   | -2.387106 | -1.126796 | 1.568737  |
| C                                                   | -3.780355 | -0.825927 | 0.000789  |
| O                                                   | -4.026985 | -1.337130 | -1.065209 |
| O                                                   | -4.717185 | -0.333994 | 0.829409  |
| H                                                   | -5.592473 | -0.454184 | 0.426921  |
| H                                                   | -2.816542 | 1.285934  | 1.451664  |
| H                                                   | -1.096900 | 0.920178  | 1.328859  |
| S                                                   | -1.864298 | 1.844663  | -0.712746 |
| H                                                   | -3.164673 | 1.864989  | -1.071018 |
| C                                                   | 3.662170  | -1.102115 | -0.223408 |
| C                                                   | 2.200387  | -0.606928 | -0.491973 |
| O                                                   | 3.761629  | -2.035732 | 0.611490  |
| O                                                   | 4.556893  | -0.541541 | -0.886728 |
| H                                                   | 1.841779  | -1.143443 | -1.375095 |
| C                                                   | 2.075460  | 0.889202  | -0.754860 |
| N                                                   | 1.337516  | -1.040275 | 0.651489  |
| H                                                   | 0.320320  | -1.164972 | 0.375099  |

| Nov 11, 22 15:56 dimers_structures.xyz Page 187/325 |           |           |           |
|-----------------------------------------------------|-----------|-----------|-----------|
| H                                                   | 1.052042  | 1.159937  | -1.017209 |
| H                                                   | 2.727198  | 1.148703  | -1.585222 |
| S                                                   | 2.501157  | 1.939625  | 0.699363  |
| H                                                   | 1.749839  | -1.912918 | 1.007131  |
| H                                                   | 1.403753  | -0.350734 | 1.407062  |
| H                                                   | 3.804197  | 1.593166  | 0.748238  |
| 28                                                  |           |           |           |
| Dimer 185 of the n...z type                         |           |           |           |
| C                                                   | 2.145927  | -0.619826 | 0.139176  |
| C                                                   | 1.920293  | 0.262224  | -1.099249 |
| N                                                   | 1.423258  | -0.108606 | 1.302628  |
| H                                                   | 1.717845  | 0.849475  | 1.487347  |
| H                                                   | 1.681379  | -0.643135 | 2.128742  |
| H                                                   | 1.747411  | -1.611036 | -0.106754 |
| C                                                   | 3.637494  | -0.826396 | 0.420837  |
| O                                                   | 4.170441  | -0.623175 | 1.485278  |
| O                                                   | 4.285861  | -1.282374 | -0.664303 |
| H                                                   | 5.221751  | -1.414493 | -0.442606 |
| H                                                   | 2.400063  | -0.178810 | -1.969705 |
| H                                                   | 0.852257  | 0.331271  | -1.299678 |
| S                                                   | 2.482073  | 2.008581  | -0.915708 |
| H                                                   | 3.806243  | 1.765507  | -1.000004 |
| C                                                   | -3.303548 | 1.167095  | 0.353754  |
| C                                                   | -1.993492 | 0.385989  | -0.007963 |
| O                                                   | -3.441736 | 1.438687  | 1.572875  |
| O                                                   | -4.043729 | 1.455300  | -0.606447 |
| H                                                   | -1.282072 | 1.131112  | -0.374841 |
| C                                                   | -2.176712 | -0.683682 | -1.078581 |
| N                                                   | -1.417796 | -0.176930 | 1.253356  |
| H                                                   | -0.357382 | -0.173092 | 1.267605  |
| H                                                   | -1.230458 | -1.171354 | -1.318835 |
| H                                                   | -2.561999 | -0.210583 | -1.978191 |
| S                                                   | -3.306949 | -2.051401 | -0.577730 |
| H                                                   | -1.805509 | 0.407297  | 2.010422  |
| H                                                   | -1.761989 | -1.129944 | 1.403096  |
| H                                                   | -4.414224 | -1.288270 | -0.470561 |
| 28                                                  |           |           |           |
| Dimer 186 of the n...z type                         |           |           |           |
| C                                                   | 2.817600  | -0.798306 | 0.715294  |
| C                                                   | 2.423947  | 0.661197  | 0.986717  |
| N                                                   | 4.166277  | -1.002827 | 0.174955  |
| H                                                   | 4.482445  | -0.190049 | -0.347461 |
| H                                                   | 4.842630  | -1.201339 | 0.901987  |
| H                                                   | 2.741502  | -1.335032 | 1.667480  |
| C                                                   | 1.815562  | -1.512908 | -0.207753 |
| O                                                   | 0.607377  | -1.451339 | -0.077140 |
| O                                                   | 2.379961  | -2.246018 | -1.152645 |
| H                                                   | 3.358042  | -2.113601 | -1.004276 |
| H                                                   | 1.394720  | 0.734699  | 1.333680  |
| H                                                   | 3.080851  | 1.056502  | 1.761451  |
| S                                                   | 2.616674  | 1.783542  | -0.469161 |
| H                                                   | 1.347425  | 1.691358  | -0.931626 |
| C                                                   | -1.129902 | 1.378816  | -0.112443 |
| C                                                   | -2.027676 | 0.102487  | -0.119479 |
| O                                                   | -0.829233 | 1.811045  | 1.026309  |
| O                                                   | -0.823250 | 1.832601  | -1.234779 |
| H                                                   | -1.749790 | -0.541372 | -0.950919 |
| C                                                   | -3.501484 | 0.493935  | -0.197596 |
| N                                                   | -1.735082 | -0.652366 | 1.142637  |
| H                                                   | -0.828158 | -1.129580 | 1.023930  |
| H                                                   | -3.668567 | 1.040978  | -1.123719 |
| H                                                   | -3.772285 | 1.144380  | 0.636351  |
| S                                                   | -4.673929 | -0.925858 | -0.098625 |
| H                                                   | -1.630448 | 0.038154  | 1.896680  |
| H                                                   | -2.467486 | -1.332266 | 1.365342  |
| H                                                   | -4.300295 | -1.521055 | -1.249866 |
| 28                                                  |           |           |           |
| Dimer 187 of the n...z type                         |           |           |           |
| C                                                   | -2.592926 | 1.328222  | 0.457122  |

| Nov 11, 22 15:56 dimers_structures.xyz Page 188/325 |           |           |           |
|-----------------------------------------------------|-----------|-----------|-----------|
| C                                                   | -3.225619 | 0.042255  | 1.013970  |
| N                                                   | -3.020674 | 1.732204  | -0.886401 |
| H                                                   | -3.370320 | 0.930403  | -1.406899 |
| H                                                   | -3.745818 | 2.438711  | -0.858044 |
| H                                                   | -2.830954 | 2.134615  | 1.158865  |
| C                                                   | -1.056940 | 1.246309  | 0.479881  |
| O                                                   | -0.404484 | 0.833584  | 1.408052  |
| O                                                   | -0.487554 | 1.722356  | -0.638302 |
| H                                                   | -1.267088 | 1.965089  | -1.217314 |
| H                                                   | -2.729771 | -0.231914 | 1.944027  |
| H                                                   | -4.279836 | 0.223500  | 1.223879  |
| S                                                   | -3.211812 | -1.390770 | -0.144947 |
| H                                                   | -1.859765 | -1.519351 | -0.295632 |
| C                                                   | 0.963913  | -1.736145 | -0.150648 |
| C                                                   | 2.179544  | -0.820742 | -0.505054 |
| O                                                   | -0.029512 | -1.627918 | -0.915492 |
| O                                                   | 1.124730  | -2.484761 | 0.829138  |
| H                                                   | 2.956362  | -1.451411 | -0.941741 |
| C                                                   | 2.727241  | -0.072022 | 0.704868  |
| N                                                   | 1.764198  | 0.145047  | -1.582431 |
| H                                                   | 1.376485  | -0.370996 | -2.373610 |
| H                                                   | 2.998329  | -0.802969 | 1.462330  |
| H                                                   | 1.961996  | 0.582873  | 1.123555  |
| S                                                   | 4.172828  | 1.014020  | 0.338259  |
| H                                                   | 1.011424  | 0.769509  | -1.248770 |
| H                                                   | 2.554726  | 0.716190  | -1.892451 |
| H                                                   | 5.046585  | 0.029637  | 0.042643  |
| 28                                                  |           |           |           |
| Dimer 188 of the n...z type                         |           |           |           |
| C                                                   | 2.430461  | 0.805823  | 0.620501  |
| C                                                   | 2.261402  | -0.543829 | 1.340291  |
| N                                                   | 1.198401  | 1.228014  | -0.034831 |
| H                                                   | 0.985349  | 0.632159  | -0.833853 |
| H                                                   | 1.304587  | 2.168123  | -0.406590 |
| H                                                   | 2.680515  | 1.539018  | 1.394606  |
| C                                                   | 3.624398  | 0.770543  | -0.338068 |
| O                                                   | 3.561617  | 0.968564  | -1.527860 |
| O                                                   | 4.767847  | 0.486702  | 0.310854  |
| H                                                   | 5.498096  | 0.467241  | -0.328481 |
| H                                                   | 3.176135  | -0.807528 | 1.867198  |
| H                                                   | 1.459489  | -0.453334 | 2.072610  |
| S                                                   | 1.761002  | -1.946974 | 0.254355  |
| H                                                   | 2.941192  | -2.101787 | -0.380366 |
| C                                                   | -1.766767 | -0.578262 | -0.969463 |
| C                                                   | -1.993520 | -0.287411 | 0.548189  |
| O                                                   | -1.210690 | 0.326858  | -1.634461 |
| O                                                   | -2.183814 | -1.693181 | -1.347635 |
| H                                                   | -1.419304 | -1.015323 | 1.125048  |
| C                                                   | -3.462650 | -0.409003 | 0.949232  |
| N                                                   | -1.448122 | 1.066266  | 0.893614  |
| H                                                   | -1.560122 | 1.279345  | 1.885751  |
| H                                                   | -3.597168 | -0.218825 | 2.015516  |
| H                                                   | -3.793586 | -1.422455 | 0.734984  |
| S                                                   | -4.582242 | 0.786953  | 0.100266  |
| H                                                   | -0.414197 | 1.140465  | 0.637647  |
| H                                                   | -1.945115 | 1.778799  | 0.353552  |
| H                                                   | -4.467627 | 0.255763  | -1.134338 |
| 28                                                  |           |           |           |
| Dimer 189 of the n...z type                         |           |           |           |
| C                                                   | -2.137982 | -0.388667 | 0.190683  |
| C                                                   | -1.617171 | 0.989273  | 0.613428  |
| N                                                   | -1.715492 | -0.874244 | -1.124811 |
| H                                                   | -1.610491 | -0.098845 | -1.775036 |
| H                                                   | -0.821251 | -1.362308 | -1.053814 |
| H                                                   | -1.758079 | -1.095184 | 0.937556  |
| C                                                   | -3.669979 | -0.474967 | 0.284996  |
| O                                                   | -4.331292 | 0.049123  | 1.155489  |
| O                                                   | -4.214268 | -1.220915 | -0.677267 |
| H                                                   | -3.434527 | -1.468396 | -1.247521 |

| Nov 11, 22 15:56            |           |           |           | dimers_structures.xyz | Page 189/325 |
|-----------------------------|-----------|-----------|-----------|-----------------------|--------------|
| H                           | -2.001756 | 1.251038  | 1.597925  |                       |              |
| H                           | -0.530327 | 0.951257  | 0.667441  |                       |              |
| S                           | -2.006835 | 2.353219  | -0.564837 |                       |              |
| H                           | -3.335632 | 2.391540  | -0.335967 |                       |              |
| C                           | 1.346919  | -1.436400 | 0.472386  |                       |              |
| C                           | 2.782836  | -0.824547 | 0.412868  |                       |              |
| O                           | 0.977664  | -2.024349 | -0.580842 |                       |              |
| O                           | 0.711872  | -1.223492 | 1.517200  |                       |              |
| H                           | 3.334406  | -1.048166 | 1.323690  |                       |              |
| C                           | 2.670097  | 0.687410  | 0.203933  |                       |              |
| N                           | 3.501687  | -1.466826 | -0.742670 |                       |              |
| H                           | 3.999433  | -2.311026 | -0.458804 |                       |              |
| H                           | 2.153334  | 1.111568  | 1.062140  |                       |              |
| H                           | 2.084192  | 0.907814  | -0.691022 |                       |              |
| S                           | 4.274020  | 1.553781  | -0.054667 |                       |              |
| H                           | 2.759201  | -1.751754 | -1.404998 |                       |              |
| H                           | 4.178429  | -0.830561 | -1.176985 |                       |              |
| H                           | 4.804618  | 1.272974  | 1.153408  |                       |              |
| 28                          |           |           |           |                       |              |
| Dimer 190 of the n...z type |           |           |           |                       |              |
| C                           | 1.766144  | -0.414855 | -0.096118 |                       |              |
| C                           | 2.223963  | 0.673800  | -1.080883 |                       |              |
| N                           | 0.845742  | 0.120489  | 0.901254  |                       |              |
| H                           | 1.339005  | 0.777832  | 1.502599  |                       |              |
| H                           | 0.509599  | -0.628966 | 1.499811  |                       |              |
| H                           | 1.232586  | -1.166904 | -0.687008 |                       |              |
| C                           | 2.960648  | -1.140456 | 0.528378  |                       |              |
| O                           | 3.176741  | -1.221446 | 1.713828  |                       |              |
| O                           | 3.748591  | -1.689124 | -0.413178 |                       |              |
| H                           | 4.492026  | -2.139746 | 0.018888  |                       |              |
| H                           | 2.846460  | 0.242381  | -1.861726 |                       |              |
| H                           | 1.345858  | 1.117481  | -1.548785 |                       |              |
| S                           | 3.117825  | 2.088834  | -0.306275 |                       |              |
| H                           | 4.285660  | 1.450453  | -0.086397 |                       |              |
| C                           | -3.750202 | 0.467542  | 0.471671  |                       |              |
| C                           | -2.660607 | 0.780353  | -0.609489 |                       |              |
| O                           | -3.589392 | 1.043961  | 1.577469  |                       |              |
| O                           | -4.665018 | -0.296568 | 0.108829  |                       |              |
| H                           | -3.106561 | 1.503212  | -1.297431 |                       |              |
| C                           | -2.221534 | -0.430156 | -1.425044 |                       |              |
| N                           | -1.524874 | 1.481179  | 0.081012  |                       |              |
| H                           | -1.192276 | 2.290992  | -0.439881 |                       |              |
| H                           | -1.395058 | -0.174078 | -2.089665 |                       |              |
| H                           | -3.061487 | -0.748442 | -2.038251 |                       |              |
| S                           | -1.641181 | -1.875887 | -0.438718 |                       |              |
| H                           | -1.935995 | 1.789875  | 0.980874  |                       |              |
| H                           | -0.682480 | 0.877224  | 0.311151  |                       |              |
| H                           | -2.827544 | -2.122085 | 0.153170  |                       |              |
| 28                          |           |           |           |                       |              |
| Dimer 191 of the n...z type |           |           |           |                       |              |
| C                           | 2.899246  | -1.056630 | 0.644467  |                       |              |
| C                           | 3.416219  | 0.390123  | 0.653217  |                       |              |
| N                           | 3.287668  | -1.868795 | -0.512924 |                       |              |
| H                           | 3.513920  | -1.284064 | -1.313651 |                       |              |
| H                           | 4.081668  | -2.464430 | -0.312429 |                       |              |
| H                           | 3.266454  | -1.539457 | 1.555841  |                       |              |
| C                           | 1.366437  | -1.082866 | 0.767835  |                       |              |
| O                           | 0.730567  | -0.422496 | 1.555938  |                       |              |
| O                           | 0.779913  | -1.919513 | -0.099254 |                       |              |
| H                           | 1.547945  | -2.306356 | -0.612201 |                       |              |
| H                           | 3.030631  | 0.918738  | 1.523342  |                       |              |
| H                           | 4.504934  | 0.382623  | 0.703500  |                       |              |
| S                           | 3.013157  | 1.348460  | -0.870743 |                       |              |
| H                           | 1.682452  | 1.456194  | -0.662247 |                       |              |
| C                           | -3.615490 | -0.793771 | 0.002742  |                       |              |
| C                           | -2.229144 | -0.065216 | 0.042740  |                       |              |
| O                           | -3.883083 | -1.377600 | -1.080043 |                       |              |
| O                           | -4.298577 | -0.698067 | 1.037963  |                       |              |
| H                           | -1.649824 | -0.422687 | 0.892016  |                       |              |

| Nov 11, 22 15:56            |           |           |           | dimers_structures.xyz | Page 190/325 |
|-----------------------------|-----------|-----------|-----------|-----------------------|--------------|
| C                           | -2.420714 | 1.445241  | 0.139388  |                       |              |
| N                           | -1.487812 | -0.455209 | -1.208187 |                       |              |
| H                           | -0.738557 | -1.126637 | -0.998724 |                       |              |
| H                           | -2.986696 | 1.656612  | 1.043767  |                       |              |
| H                           | -2.987302 | 1.824178  | -0.714011 |                       |              |
| S                           | -0.852797 | 2.419326  | 0.146923  |                       |              |
| H                           | -2.212528 | -0.913658 | -1.796182 |                       |              |
| H                           | -1.065497 | 0.341718  | -1.688610 |                       |              |
| H                           | -0.282246 | 1.780793  | 1.189315  |                       |              |
| 28                          |           |           |           |                       |              |
| Dimer 192 of the n...z type |           |           |           |                       |              |
| C                           | 1.965815  | -0.687015 | 0.115283  |                       |              |
| C                           | 3.465491  | -0.844083 | -0.190486 |                       |              |
| N                           | 1.110951  | -0.361191 | -1.031811 |                       |              |
| H                           | 1.531296  | 0.396848  | -1.564647 |                       |              |
| H                           | 1.055081  | -1.161151 | -1.655115 |                       |              |
| H                           | 1.620166  | -1.650601 | 0.504883  |                       |              |
| C                           | 1.698653  | 0.339970  | 1.232053  |                       |              |
| O                           | 2.520854  | 1.161891  | 1.592667  |                       |              |
| O                           | 0.499388  | 0.290937  | 1.793284  |                       |              |
| H                           | -0.073548 | -0.495350 | 1.487999  |                       |              |
| H                           | 4.027298  | -1.009804 | 0.729087  |                       |              |
| H                           | 3.601050  | -1.715635 | -0.833071 |                       |              |
| S                           | 4.245011  | 0.541334  | -1.125429 |                       |              |
| H                           | 4.112245  | 1.464864  | -0.153692 |                       |              |
| C                           | -1.901030 | -1.669359 | 0.324827  |                       |              |
| C                           | -2.079905 | -0.296080 | -0.379212 |                       |              |
| O                           | -2.656620 | -2.589880 | -0.034792 |                       |              |
| O                           | -1.010743 | -1.698979 | 1.218758  |                       |              |
| H                           | -1.096085 | 0.079027  | -0.663832 |                       |              |
| C                           | -2.807179 | 0.684539  | 0.540946  |                       |              |
| N                           | -2.867743 | -0.529947 | -1.638995 |                       |              |
| H                           | -2.256976 | -0.785721 | -2.416192 |                       |              |
| H                           | -2.211788 | 0.819222  | 1.441441  |                       |              |
| H                           | -3.786841 | 0.299827  | 0.832859  |                       |              |
| S                           | -3.142249 | 2.325172  | -0.227615 |                       |              |
| H                           | -3.492461 | -1.330824 | -1.464647 |                       |              |
| H                           | -3.397243 | 0.304737  | -1.912642 |                       |              |
| H                           | -1.852948 | 2.678835  | -0.407881 |                       |              |
| 28                          |           |           |           |                       |              |
| Dimer 193 of the n...z type |           |           |           |                       |              |
| C                           | 2.870393  | -0.369761 | 0.611576  |                       |              |
| C                           | 3.071848  | -0.107593 | -0.888802 |                       |              |
| N                           | 2.569268  | -1.754226 | 0.991329  |                       |              |
| H                           | 2.084355  | -2.238581 | 0.239278  |                       |              |
| H                           | 3.407157  | -2.275391 | 1.219721  |                       |              |
| H                           | 3.791781  | -0.066987 | 1.121296  |                       |              |
| C                           | 1.784921  | 0.544972  | 1.202150  |                       |              |
| O                           | 1.645285  | 1.712309  | 0.932859  |                       |              |
| O                           | 0.988694  | -0.082342 | 2.085773  |                       |              |
| H                           | 1.318186  | -1.025455 | 2.079903  |                       |              |
| H                           | 3.221442  | 0.956227  | -1.065521 |                       |              |
| H                           | 3.960929  | -0.642060 | -1.222913 |                       |              |
| S                           | 1.699923  | -0.713538 | -1.963457 |                       |              |
| H                           | 0.831645  | 0.322751  | -1.791468 |                       |              |
| C                           | -1.247260 | 1.693367  | -0.585684 |                       |              |
| C                           | -1.540025 | 0.288836  | 0.035475  |                       |              |
| O                           | -1.692044 | 2.667909  | 0.062668  |                       |              |
| O                           | -0.641300 | 1.676486  | -1.678411 |                       |              |
| H                           | -0.675526 | -0.362920 | -0.070838 |                       |              |
| C                           | -2.750652 | -0.337452 | -0.654512 |                       |              |
| N                           | -1.788093 | 0.483030  | 1.502634  |                       |              |
| H                           | -0.901788 | 0.401194  | 2.018217  |                       |              |
| H                           | -2.520090 | -0.456671 | -1.711285 |                       |              |
| H                           | -3.625847 | 0.309037  | -0.566079 |                       |              |
| S                           | -3.273332 | -1.955760 | 0.056038  |                       |              |
| H                           | -2.147246 | 1.445570  | 1.606249  |                       |              |
| H                           | -2.446588 | -0.206620 | 1.877177  |                       |              |
| H                           | -2.132529 | -2.622078 | -0.217105 |                       |              |



| Nov 11, 22 15:56       | dimers_structures.xyz | Page 191/325 |
|------------------------|-----------------------|--------------|
| 28                     |                       |              |
| Dimer 194 of the n...z | type                  |              |
| C                      | -2.885787             | 0.873054     |
| C                      | -3.204629             | 0.382765     |
| N                      | -3.083034             | -0.091852    |
| H                      | -2.880420             | -1.039909    |
| H                      | -4.031611             | -0.070894    |
| H                      | -3.531567             | 1.736623     |
| C                      | -1.455826             | 1.426230     |
| O                      | -0.879710             | 2.019433     |
| O                      | -0.885286             | 1.194745     |
| H                      | -1.541197             | 0.620046     |
| H                      | -3.092209             | 1.193410     |
| H                      | -4.236246             | 0.032858     |
| S                      | -2.178587             | -1.045763    |
| H                      | -1.079530             | -0.330528    |
| C                      | 3.155905              | 0.658652     |
| C                      | 1.960697              | 0.015108     |
| O                      | 3.759235              | 1.581315     |
| O                      | 3.356866              | 0.201500     |
| H                      | 1.043959              | 0.336573     |
| C                      | 2.042674              | -1.504960    |
| N                      | 1.949769              | 0.631026     |
| H                      | 1.018581              | 0.982870     |
| H                      | 2.059169              | -1.877107    |
| H                      | 2.966006              | -1.826176    |
| S                      | 0.689680              | -2.330127    |
| H                      | 2.646311              | 1.400606     |
| H                      | 2.252806              | -0.018318    |
| H                      | -0.325728             | -1.981071    |
| 28                     |                       |              |
| Dimer 195 of the n...z | type                  |              |
| C                      | 1.704419              | 0.568771     |
| C                      | 1.993179              | -0.608822    |
| N                      | 0.779562              | 0.187140     |
| H                      | 1.268600              | -0.380713    |
| H                      | 0.453859              | 1.015493     |
| H                      | 1.223883              | 1.339302     |
| C                      | 3.004114              | 1.171061     |
| O                      | 3.327186              | 1.199954     |
| O                      | 3.762045              | 1.663755     |
| H                      | 4.583234              | 2.021498     |
| H                      | 2.672439              | -0.301060    |
| H                      | 1.056786              | -0.924641    |
| S                      | 2.659029              | -2.119981    |
| H                      | 3.906085              | -1.658016    |
| C                      | -3.377008             | 0.192201     |
| C                      | -2.784377             | -0.904220    |
| O                      | -2.974708             | 0.145819     |
| O                      | -4.206801             | 0.964909     |
| H                      | -3.495842             | -1.735748    |
| C                      | -2.585794             | -0.476198    |
| N                      | -1.524355             | -1.428288    |
| H                      | -1.229381             | -2.320266    |
| H                      | -2.118091             | -1.272716    |
| H                      | -3.564978             | -0.274538    |
| S                      | -1.520417             | 1.005115     |
| H                      | -1.717668             | -1.545121    |
| H                      | -0.704902             | -0.751377    |
| H                      | -2.327244             | 1.861546     |
| 28                     |                       |              |
| Dimer 196 of the n...z | type                  |              |
| C                      | -1.807302             | -0.250966    |
| C                      | -3.190749             | -0.830020    |
| N                      | -1.415089             | -0.229478    |
| H                      | -2.222279             | -0.243172    |
| H                      | -0.786264             | -0.998444    |
| H                      | -1.075279             | -0.858317    |
| C                      | -1.643048             | 1.165281     |

| Nov 11, 22 15:56       | dimers_structures.xyz | Page 192/325 |
|------------------------|-----------------------|--------------|
| O                      | -2.034459             | 1.499069     |
| O                      | -0.985602             | 1.991256     |
| H                      | -0.852834             | 1.437674     |
| H                      | -3.379797             | -0.794272    |
| H                      | -3.229950             | -1.869733    |
| S                      | -4.584742             | -0.001026    |
| H                      | -4.513056             | 1.174310     |
| C                      | 1.440578              | -1.714936    |
| C                      | 2.767755              | -0.891525    |
| O                      | 0.943536              | -1.913138    |
| O                      | 0.994903              | -2.026421    |
| H                      | 3.501908              | -1.353463    |
| C                      | 2.466746              | 0.541174     |
| N                      | 3.314521              | -0.904441    |
| H                      | 3.939374              | -1.695729    |
| H                      | 2.087948              | 0.508831     |
| H                      | 1.697817              | 0.989276     |
| S                      | 3.896569              | 1.696588     |
| H                      | 2.491060              | -1.033476    |
| H                      | 3.827502              | -0.044483    |
| H                      | 4.677697              | 1.069259     |
| 28                     |                       |              |
| Dimer 197 of the n...z | type                  |              |
| C                      | 2.659518              | 0.767445     |
| C                      | 3.765362              | 0.370350     |
| N                      | 2.985932              | 0.666694     |
| H                      | 3.655903              | -0.079925    |
| H                      | 3.371769              | 1.530442     |
| H                      | 2.391202              | 1.808117     |
| C                      | 1.364163              | -0.019613    |
| O                      | 0.932832              | -0.294545    |
| O                      | 0.717810              | -0.349669    |
| H                      | 1.317498              | -0.019994    |
| H                      | 3.416181              | 0.490703     |
| H                      | 4.629779              | 1.016959     |
| S                      | 4.397391              | -1.346561    |
| H                      | 3.298403              | -1.981104    |
| C                      | -3.841296             | -1.114904    |
| C                      | -3.047273             | 0.153330     |
| O                      | -3.638069             | -2.157577    |
| O                      | -4.586724             | -0.944363    |
| H                      | -3.770911             | 0.870734     |
| C                      | -2.237015             | 0.775199     |
| N                      | -2.182927             | -0.286322    |
| H                      | -2.337130             | 0.261065     |
| H                      | -2.914050             | 0.993720     |
| H                      | -1.471428             | 0.084740     |
| S                      | -1.307291             | 2.299012     |
| H                      | -2.485697             | -1.273949    |
| H                      | -1.173309             | -0.274367    |
| H                      | -2.378406             | 3.049421     |
| 28                     |                       |              |
| Dimer 198 of the n...z | type                  |              |
| C                      | -1.566437             | -0.256689    |
| C                      | -2.799428             | -0.559900    |
| N                      | -1.365484             | -1.108895    |
| H                      | -2.215512             | -1.591208    |
| H                      | -0.605031             | -1.767512    |
| H                      | -0.690630             | -0.362956    |
| C                      | -1.537792             | 1.218023     |
| O                      | -1.807591             | 2.154286     |
| O                      | -1.143172             | 1.365337     |
| H                      | -1.054167             | 0.415738     |
| H                      | -2.857786             | 0.139017     |
| H                      | -2.723374             | -1.571475    |
| S                      | -4.397841             | -0.530662    |
| H                      | -4.419820             | 0.796103     |
| C                      | 2.059709              | -1.377706    |
| C                      | 3.165534              | -0.725589    |

| Nov 11, 22 15:56            | dimers_structures.xyz |           |           | Page 193/325 |
|-----------------------------|-----------------------|-----------|-----------|--------------|
| O                           | 1.216943              | -2.077347 | -0.053386 |              |
| O                           | 2.143434              | -1.155854 | 1.791823  |              |
| H                           | 4.059531              | -1.346333 | -0.230485 |              |
| C                           | 3.515434              | 0.708448  | 0.059799  |              |
| N                           | 2.699111              | -0.833960 | -1.746865 |              |
| H                           | 3.447822              | -1.016306 | -2.414701 |              |
| H                           | 4.332155              | 1.087880  | -0.555504 |              |
| H                           | 3.830091              | 0.718504  | 1.100408  |              |
| S                           | 2.129654              | 1.901205  | -0.173615 |              |
| H                           | 2.006431              | -1.605944 | -1.734809 |              |
| H                           | 2.202789              | 0.020372  | -2.024854 |              |
| H                           | 1.344077              | 1.424508  | 0.813588  |              |
| 28                          |                       |           |           |              |
| Dimer 199 of the n...z type |                       |           |           |              |
| C                           | 2.881409              | 1.010790  | -0.258808 |              |
| C                           | 3.066335              | -0.310317 | -1.033105 |              |
| N                           | 3.692589              | 1.033999  | 0.945565  |              |
| H                           | 3.376820              | 0.310214  | 1.585916  |              |
| H                           | 3.583426              | 1.919691  | 1.429238  |              |
| H                           | 3.219336              | 1.810053  | -0.927479 |              |
| C                           | 1.391166              | 1.252170  | -0.017595 |              |
| O                           | 0.873839              | 1.270507  | 1.086438  |              |
| O                           | 0.709750              | 1.409842  | -1.147837 |              |
| H                           | -0.251418             | 1.519798  | -0.945513 |              |
| H                           | 2.531060              | -0.275500 | -1.980114 |              |
| H                           | 4.129115              | -0.439390 | -1.236015 |              |
| S                           | 2.560799              | -1.827922 | -0.112228 |              |
| H                           | 1.218739              | -1.705788 | -0.252289 |              |
| C                           | -2.005932             | -1.529455 | -0.238520 |              |
| C                           | -2.486855             | -0.637566 | 0.954497  |              |
| O                           | -0.878451             | -2.063973 | -0.082776 |              |
| O                           | -2.804560             | -1.634185 | -1.186863 |              |
| H                           | -3.151196             | -1.260945 | 1.558321  |              |
| C                           | -3.255694             | 0.619630  | 0.566615  |              |
| N                           | -1.295296             | -0.343198 | 1.822343  |              |
| H                           | -1.543512             | -0.171764 | 2.796689  |              |
| H                           | -3.394355             | 1.275326  | 1.427301  |              |
| H                           | -4.239078             | 0.324749  | 0.208488  |              |
| S                           | -2.495115             | 1.672750  | -0.745571 |              |
| H                           | -0.685215             | -1.169965 | 1.748776  |              |
| H                           | -0.719504             | 0.449546  | 1.483972  |              |
| H                           | -2.653414             | 0.772093  | -1.738060 |              |
| 28                          |                       |           |           |              |
| Dimer 200 of the n...z type |                       |           |           |              |
| C                           | 3.221901              | -0.517867 | -0.490810 |              |
| C                           | 1.793166              | 0.005887  | -0.664576 |              |
| N                           | 3.418555              | -1.551096 | 0.529659  |              |
| H                           | 2.795117              | -1.409639 | 1.320611  |              |
| H                           | 3.252692              | -2.479868 | 0.160603  |              |
| H                           | 3.525904              | -0.938597 | -1.456181 |              |
| C                           | 4.220474              | 0.628173  | -0.239311 |              |
| O                           | 4.144367              | 1.714526  | -0.767951 |              |
| O                           | 5.206801              | 0.305345  | 0.597404  |              |
| H                           | 4.986812              | -0.614186 | 0.896832  |              |
| H                           | 1.753408              | 0.749027  | -1.459039 |              |
| H                           | 1.117249              | -0.811188 | -0.917499 |              |
| S                           | 1.080525              | 0.748389  | 0.869840  |              |
| H                           | 1.727015              | 1.929762  | 0.804160  |              |
| C                           | -1.827521             | -1.529471 | -0.175894 |              |
| C                           | -2.552845             | -0.193335 | 0.195016  |              |
| O                           | -1.147338             | -1.495523 | -1.231504 |              |
| O                           | -2.034165             | -2.476821 | 0.605081  |              |
| H                           | -2.406302             | 0.025580  | 1.251633  |              |
| C                           | -4.042554             | -0.297687 | -0.128394 |              |
| N                           | -1.916884             | 0.917909  | -0.588544 |              |
| H                           | -1.022289             | 1.190666  | -0.149102 |              |
| H                           | -4.464601             | -1.114534 | 0.452925  |              |
| H                           | -4.192333             | -0.519071 | -1.187121 |              |
| S                           | -5.003822             | 1.246113  | 0.177410  |              |

| Nov 11, 22 15:56            | dimers_structures.xyz |           |           | Page 194/325 |
|-----------------------------|-----------------------|-----------|-----------|--------------|
| H                           | -1.683985             | 0.543024  | -1.517387 |              |
| H                           | -2.528916             | 1.736571  | -0.659591 |              |
| H                           | -4.831743             | 1.278299  | 1.514925  |              |
| 28                          |                       |           |           |              |
| Dimer 201 of the n...z type |                       |           |           |              |
| C                           | -2.026652             | -0.397380 | -0.001042 |              |
| C                           | -2.100092             | 0.949170  | 0.728236  |              |
| N                           | -1.984085             | -0.345512 | -1.463523 |              |
| H                           | -2.517310             | 0.449174  | -1.808212 |              |
| H                           | -1.015393             | -0.254372 | -1.773380 |              |
| H                           | -1.106312             | -0.890101 | 0.335401  |              |
| C                           | -3.155705             | -1.349577 | 0.432232  |              |
| O                           | -3.574549             | -1.437634 | 1.566052  |              |
| O                           | -3.615607             | -2.104891 | -0.564933 |              |
| H                           | -3.111300             | -1.773469 | -1.359193 |              |
| H                           | -2.097722             | 0.797402  | 1.806536  |              |
| H                           | -1.228993             | 1.543640  | 0.451444  |              |
| S                           | -3.562717             | 1.976063  | 0.272067  |              |
| H                           | -4.494211             | 1.208707  | 0.874554  |              |
| C                           | 1.367401              | 0.529550  | -0.688782 |              |
| C                           | 2.517760              | 0.007384  | 0.230166  |              |
| O                           | 0.947347              | -0.305748 | -1.535204 |              |
| O                           | 1.018036              | 1.706036  | -0.503252 |              |
| H                           | 2.339046              | 0.299576  | 1.262992  |              |
| C                           | 3.856481              | 0.556956  | -0.264704 |              |
| N                           | 2.505321              | -1.495801 | 0.158350  |              |
| H                           | 1.884299              | -1.903115 | 0.858086  |              |
| H                           | 3.828837              | 1.641958  | -0.189776 |              |
| H                           | 4.016281              | 0.291478  | -1.311797 |              |
| S                           | 5.332639              | -0.097343 | 0.622558  |              |
| H                           | 2.115635              | -1.726099 | -0.771806 |              |
| H                           | 3.440924              | -1.893884 | 0.292070  |              |
| H                           | 5.021839              | 0.400055  | 1.837344  |              |
| 28                          |                       |           |           |              |
| Dimer 202 of the n...z type |                       |           |           |              |
| C                           | 3.030114              | -0.279249 | -0.065024 |              |
| C                           | 2.928171              | 1.204514  | -0.449163 |              |
| N                           | 2.658038              | -1.240853 | -1.106296 |              |
| H                           | 2.001490              | -0.830490 | -1.765058 |              |
| H                           | 3.464111              | -1.570315 | -1.623248 |              |
| H                           | 4.072048              | -0.462993 | 0.218466  |              |
| C                           | 2.229853              | -0.584353 | 1.216468  |              |
| O                           | 2.262653              | 0.109977  | 2.207094  |              |
| O                           | 1.524052              | -1.713941 | 1.153835  |              |
| H                           | 1.692145              | -2.057360 | 0.236402  |              |
| H                           | 3.153935              | 1.826730  | 0.415376  |              |
| H                           | 3.654859              | 1.421755  | -1.232208 |              |
| S                           | 1.302426              | 1.716675  | -1.153673 |              |
| H                           | 0.549523              | 1.621295  | -0.025476 |              |
| C                           | -2.117451             | 1.160786  | 0.622520  |              |
| C                           | -2.753754             | -0.263921 | 0.736293  |              |
| O                           | -2.791007             | 2.001499  | -0.021981 |              |
| O                           | -1.023802             | 1.304077  | 1.204183  |              |
| H                           | -3.132345             | -0.368515 | 1.754760  |              |
| C                           | -1.785203             | -1.406651 | 0.446775  |              |
| N                           | -3.943447             | -0.286434 | -0.185441 |              |
| H                           | -4.753812             | -0.775741 | 0.192373  |              |
| H                           | -2.246195             | -2.371864 | 0.660327  |              |
| H                           | -0.909536             | -1.288775 | 1.080272  |              |
| S                           | -1.249189             | -1.510206 | -1.313741 |              |
| H                           | -4.150306             | 0.715708  | -0.361868 |              |
| H                           | -3.682754             | -0.707995 | -1.085125 |              |
| H                           | -0.532627             | -0.363570 | -1.336468 |              |
| 28                          |                       |           |           |              |
| Dimer 203 of the n...z type |                       |           |           |              |
| C                           | -2.317742             | -0.538974 | 0.206644  |              |
| C                           | -1.717417             | 0.584026  | 1.062437  |              |
| N                           | -1.557476             | -0.944064 | -0.976913 |              |
| H                           | -1.151470             | -0.124159 | -1.423914 |              |

| Nov 11, 22 15:56            | dimers_structures.xyz |           | Page 195/325 |
|-----------------------------|-----------------------|-----------|--------------|
| H                           | -0.785750             | -1.560261 | -0.718907    |
| H                           | -2.405952             | -1.416794 | 0.858695     |
| C                           | -3.764591             | -0.230249 | -0.217301    |
| O                           | -4.564640             | 0.364653  | 0.470427     |
| O                           | -4.076766             | -0.717118 | -1.419806    |
| H                           | -3.223435             | -1.106916 | -1.749454    |
| H                           | -2.383428             | 0.824443  | 1.889736     |
| H                           | -0.763507             | 0.246219  | 1.467630     |
| S                           | -1.336829             | 2.129022  | 0.131494     |
| H                           | -2.612272             | 2.512007  | -0.084015    |
| C                           | 1.458781              | -1.530739 | 0.795822     |
| C                           | 2.756200              | -0.771538 | 0.369933     |
| O                           | 0.957742              | -2.270189 | -0.094088    |
| O                           | 1.038136              | -1.275547 | 1.935720     |
| H                           | 3.518733              | -0.857522 | 1.141680     |
| C                           | 2.416891              | 0.697235  | 0.107623     |
| N                           | 3.276464              | -1.428173 | -0.880276    |
| H                           | 3.926293              | -2.185771 | -0.668128    |
| H                           | 2.057275              | 1.134376  | 1.036412     |
| H                           | 1.623887              | 0.782892  | -0.638137    |
| S                           | 3.806562              | 1.702906  | -0.561348    |
| H                           | 2.449226              | -1.850947 | -1.335738    |
| H                           | 3.753881              | -0.761344 | -1.495749    |
| H                           | 4.619370              | 1.585638  | 0.508917     |
| 28                          |                       |           |              |
| Dimer 204 of the n...z type |                       |           |              |
| C                           | 2.321123              | 0.527656  | 0.410819     |
| C                           | 3.408612              | 0.731833  | -0.648435    |
| N                           | 2.778629              | 0.243882  | 1.774128     |
| H                           | 3.661324              | -0.261385 | 1.766866     |
| H                           | 2.900375              | 1.092302  | 2.314021     |
| H                           | 1.703780              | 1.432550  | 0.443574     |
| C                           | 1.316657              | -0.555419 | -0.003411    |
| O                           | 0.900344              | -0.718721 | -1.125288    |
| O                           | 0.876297              | -1.292817 | 1.030598     |
| H                           | 1.403957              | -0.952557 | 1.806742     |
| H                           | 2.956220              | 0.938497  | -1.616943    |
| H                           | 4.029982              | 1.582359  | -0.367657    |
| S                           | 4.577476              | -0.685239 | -0.818953    |
| H                           | 3.709954              | -1.538307 | -1.401046    |
| C                           | -1.322878             | 1.430135  | -0.054708    |
| C                           | -2.190578             | 0.131599  | -0.125539    |
| O                           | -0.694676             | 1.609216  | 1.016725     |
| O                           | -1.360122             | 2.138844  | -1.079063    |
| H                           | -1.839493             | -0.476748 | -0.958513    |
| C                           | -3.671139             | 0.464866  | -0.289841    |
| N                           | -1.969343             | -0.680498 | 1.122296     |
| H                           | -1.022340             | -1.085392 | 1.132503     |
| H                           | -3.788994             | 1.059308  | -1.192435    |
| H                           | -4.033066             | 1.054888  | 0.555066     |
| S                           | -4.783411             | -1.005906 | -0.359486    |
| H                           | -2.025421             | -0.067550 | 1.940083     |
| H                           | -2.662680             | -1.431548 | 1.198817     |
| H                           | -4.309161             | -1.507963 | -1.518112    |
| 28                          |                       |           |              |
| Dimer 205 of the n...z type |                       |           |              |
| C                           | 3.072263              | 0.389528  | -0.749473    |
| C                           | 2.646785              | 1.785331  | -0.274183    |
| N                           | 2.220732              | -0.319096 | -1.695926    |
| H                           | 1.247170              | -0.387518 | -1.397262    |
| H                           | 2.262068              | 0.085087  | -2.623426    |
| H                           | 4.046298              | 0.531778  | -1.235891    |
| C                           | 3.382036              | -0.551681 | 0.428621     |
| O                           | 3.777617              | -0.178654 | 1.509853     |
| O                           | 3.209431              | -1.842838 | 0.138951     |
| H                           | 2.836791              | -1.850674 | -0.777856    |
| H                           | 3.422159              | 2.206254  | 0.364424     |
| H                           | 2.520328              | 2.437211  | -1.138827    |
| S                           | 1.046968              | 1.894686  | 0.631400     |

| Nov 11, 22 15:56            | dimers_structures.xyz |           | Page 196/325 |
|-----------------------------|-----------------------|-----------|--------------|
| H                           | 1.327481              | 1.003958  | 1.603887     |
| C                           | -1.113569             | -1.435284 | 0.097468     |
| C                           | -2.090126             | -0.220744 | 0.201140     |
| O                           | -0.432279             | -1.490282 | -0.958213    |
| O                           | -1.143675             | -2.221059 | 1.060874     |
| H                           | -1.952981             | 0.275403  | 1.161712     |
| C                           | -3.538021             | -0.679456 | 0.039915     |
| N                           | -1.727252             | 0.770928  | -0.865704    |
| H                           | -0.849000             | 1.247613  | -0.603600    |
| H                           | -3.756216             | -1.408241 | 0.817275     |
| H                           | -3.684302             | -1.160094 | -0.929677    |
| S                           | -4.781087             | 0.681923  | 0.092577     |
| H                           | -1.537826             | 0.259672  | -1.734132    |
| H                           | -2.467407             | 1.465545  | -1.006325    |
| H                           | -4.567977             | 1.041931  | 1.374842     |
| 28                          |                       |           |              |
| Dimer 206 of the n...z type |                       |           |              |
| C                           | 2.544024              | 0.137036  | -0.860092    |
| C                           | 2.781470              | 1.368776  | 0.021050     |
| N                           | 1.378294              | 0.172711  | -1.748285    |
| H                           | 0.615467              | 0.769704  | -1.413696    |
| H                           | 1.629404              | 0.489243  | -2.676964    |
| H                           | 3.439971              | 0.017709  | -1.480828    |
| C                           | 2.485287              | -1.156702 | -0.023658    |
| O                           | 3.190890              | -1.380956 | 0.934311     |
| O                           | 1.587807              | -2.030590 | -0.482199    |
| H                           | 1.166546              | -1.538037 | -1.244580    |
| H                           | 3.749713              | 1.296905  | 0.513686     |
| H                           | 2.779292              | 2.261696  | -0.604040    |
| S                           | 1.496324              | 1.664327  | 1.312369     |
| H                           | 1.898716              | 0.688004  | 2.150603     |
| C                           | -2.012999             | 1.547689  | -0.563407    |
| C                           | -1.816425             | 0.229730  | 0.249310     |
| O                           | -3.063819             | 2.185527  | -0.318437    |
| O                           | -1.108864             | 1.793946  | -1.388369    |
| H                           | -0.806399             | 0.202884  | 0.651392     |
| C                           | -2.086423             | -0.981835 | -0.640778    |
| N                           | -2.771035             | 0.259543  | 1.412276     |
| H                           | -2.357320             | 0.721255  | 2.223054     |
| H                           | -1.404847             | -0.940518 | -1.487964    |
| H                           | -3.107182             | -0.960097 | -1.028361    |
| S                           | -1.923900             | -2.606427 | 0.215396     |
| H                           | -3.573384             | 0.835410  | 1.109223     |
| H                           | -3.061924             | -0.680549 | 1.698153     |
| H                           | -0.595351             | -2.527363 | 0.441140     |
| 28                          |                       |           |              |
| Dimer 207 of the n...z type |                       |           |              |
| C                           | 2.690580              | -0.902530 | 0.012860     |
| C                           | 3.343157              | 0.371639  | -0.542191    |
| N                           | 1.890029              | -1.682457 | -0.930164    |
| H                           | 1.440115              | -1.082176 | -1.616637    |
| H                           | 2.452300              | -2.363478 | -1.425979    |
| H                           | 3.496912              | -1.544148 | 0.385681     |
| C                           | 1.842143              | -0.584517 | 1.255059     |
| O                           | 2.156967              | 0.210853  | 2.107712     |
| O                           | 0.702274              | -1.286823 | 1.329031     |
| H                           | 0.641918              | -1.831845 | 0.499975     |
| H                           | 3.958775              | 0.848115  | 0.218629     |
| H                           | 3.977116              | 0.109339  | -1.389046    |
| S                           | 2.136631              | 1.606976  | -1.193651    |
| H                           | 1.702994              | 2.044720  | 0.005789     |
| C                           | -2.231990             | -1.545333 | -0.680019    |
| C                           | -2.501659             | -0.220368 | 0.106187     |
| O                           | -1.551986             | -2.412614 | -0.082084    |
| O                           | -2.719697             | -1.570331 | -1.827274    |
| H                           | -3.576835             | -0.044984 | 0.148212     |
| C                           | -1.801826             | 0.959729  | -0.564689    |
| N                           | -2.032438             | -0.368520 | 1.529239     |
| H                           | -2.577131             | -1.080819 | 2.015501     |

| Nov 11, 22 15:56            |           |           | dimers_structures.xyz | Page 197/325 |
|-----------------------------|-----------|-----------|-----------------------|--------------|
| H                           | -2.174114 | 1.040527  | -1.583111             |              |
| H                           | -0.723436 | 0.801361  | -0.614569             |              |
| S                           | -2.003542 | 2.574560  | 0.303059              |              |
| H                           | -1.046072 | -0.676867 | 1.555109              |              |
| H                           | -2.121162 | 0.519461  | 2.033605              |              |
| H                           | -3.326820 | 2.712648  | 0.080477              |              |
| 28                          |           |           |                       |              |
| Dimer 208 of the n...z type |           |           |                       |              |
| C                           | -2.986892 | 0.153228  | 0.604759              |              |
| C                           | -2.852265 | -1.328977 | 0.228658              |              |
| N                           | -3.461860 | 1.046456  | -0.457061             |              |
| H                           | -3.159847 | 0.715969  | -1.370591             |              |
| H                           | -4.471833 | 1.123697  | -0.463157             |              |
| H                           | -3.693150 | 0.214114  | 1.440605              |              |
| C                           | -1.672826 | 0.718841  | 1.168919              |              |
| O                           | -0.943220 | 0.116947  | 1.924395              |              |
| O                           | -1.414168 | 1.966722  | 0.769541              |              |
| H                           | -2.161819 | 2.180628  | 0.147673              |              |
| H                           | -2.461800 | -1.896491 | 1.071741              |              |
| H                           | -3.838527 | -1.718491 | -0.023322             |              |
| S                           | -1.789130 | -1.643718 | -1.247213             |              |
| H                           | -0.588650 | -1.742293 | -0.610571             |              |
| C                           | 2.245816  | -1.598542 | 0.190131              |              |
| C                           | 1.989731  | -0.065025 | 0.329125              |              |
| O                           | 3.439669  | -1.961271 | 0.316282              |              |
| O                           | 1.236941  | -2.288714 | -0.066496             |              |
| H                           | 1.141766  | 0.117443  | 0.985818              |              |
| C                           | 1.744307  | 0.545793  | -1.052460             |              |
| N                           | 3.213313  | 0.538698  | 0.964314              |              |
| H                           | 3.139202  | 0.559790  | 1.981559              |              |
| H                           | 0.833829  | 0.112799  | -1.461931             |              |
| H                           | 2.568181  | 0.313632  | -1.730321             |              |
| S                           | 1.613386  | 2.383849  | -1.062579             |              |
| H                           | 3.994514  | -0.094814 | 0.722469              |              |
| H                           | 3.378087  | 1.496947  | 0.637503              |              |
| H                           | 0.510782  | 2.457518  | -0.286126             |              |
| 28                          |           |           |                       |              |
| Dimer 209 of the n...z type |           |           |                       |              |
| C                           | 3.305099  | 0.601799  | 0.303241              |              |
| C                           | 1.819454  | 0.417684  | 0.631423              |              |
| N                           | 3.617598  | 1.345033  | -0.919455             |              |
| H                           | 2.925865  | 1.170366  | -1.644132             |              |
| H                           | 3.654745  | 2.343610  | -0.753223             |              |
| H                           | 3.752491  | 1.140678  | 1.146343              |              |
| C                           | 4.048505  | -0.747796 | 0.272085              |              |
| O                           | 3.800689  | -1.668450 | 1.017831              |              |
| O                           | 5.020773  | -0.802539 | -0.637721             |              |
| H                           | 4.959957  | 0.061759  | -1.119780             |              |
| H                           | 1.699389  | -0.115094 | 1.572923              |              |
| H                           | 1.337314  | 1.391028  | 0.716698              |              |
| S                           | 0.871734  | -0.473177 | -0.678681             |              |
| H                           | 1.365379  | -1.703627 | -0.430072             |              |
| C                           | -4.026399 | -1.066214 | -0.302378             |              |
| C                           | -3.137017 | -0.017874 | 0.457352              |              |
| O                           | -3.733815 | -2.269804 | -0.080433             |              |
| O                           | -4.931116 | -0.591473 | -1.011043             |              |
| H                           | -3.743405 | 0.391843  | 1.265997              |              |
| C                           | -2.641690 | 1.102373  | -0.446959             |              |
| N                           | -2.005875 | -0.779700 | 1.096580              |              |
| H                           | -2.322328 | -1.768908 | 1.052548              |              |
| H                           | -3.505326 | 1.588142  | -0.893465             |              |
| H                           | -2.024116 | 0.705689  | -1.254763             |              |
| S                           | -1.583187 | 2.357467  | 0.393060              |              |
| H                           | -1.124464 | -0.702325 | 0.559933              |              |
| H                           | -1.816865 | -0.496532 | 2.056705              |              |
| H                           | -2.517412 | 2.805694  | 1.256689              |              |
| 28                          |           |           |                       |              |
| Dimer 210 of the n...z type |           |           |                       |              |
| C                           | 3.035945  | 0.361236  | -0.722133             |              |

| Nov 11, 22 15:56            |           |           | dimers_structures.xyz | Page 198/325 |
|-----------------------------|-----------|-----------|-----------------------|--------------|
| C                           | 1.541072  | 0.121649  | -0.489059             |              |
| N                           | 3.688479  | -0.481557 | -1.727258             |              |
| H                           | 3.285343  | -1.415096 | -1.742149             |              |
| H                           | 3.607744  | -0.088472 | -2.657437             |              |
| H                           | 3.142655  | 1.404978  | -1.039600             |              |
| C                           | 3.834304  | 0.276746  | 0.593494              |              |
| O                           | 3.413641  | 0.660378  | 1.661625              |              |
| O                           | 5.056190  | -0.234472 | 0.444648              |              |
| H                           | 5.099816  | -0.498178 | -0.510460             |              |
| H                           | 1.146894  | 0.819687  | 0.247096              |              |
| H                           | 1.000736  | 0.263165  | -1.425031             |              |
| S                           | 1.132223  | -1.599300 | 0.045771              |              |
| H                           | 1.659727  | -1.510646 | 1.284612              |              |
| C                           | -1.590643 | 1.553880  | -0.099835             |              |
| C                           | -2.372872 | 0.199354  | -0.158124             |              |
| O                           | -1.067654 | 1.821736  | 1.010325              |              |
| O                           | -1.600588 | 2.216929  | -1.153410             |              |
| H                           | -2.113452 | -0.341048 | -1.067366             |              |
| C                           | -3.877156 | 0.463035  | -0.105751             |              |
| N                           | -1.938385 | -0.636945 | 1.009435              |              |
| H                           | -1.044471 | -1.113378 | 0.797875              |              |
| H                           | -4.150448 | 1.073100  | -0.964017             |              |
| H                           | -4.141232 | 1.011427  | 0.800880              |              |
| S                           | -4.920508 | -1.056922 | -0.063558             |              |
| H                           | -1.751708 | 0.011064  | 1.787588              |              |
| H                           | -2.641091 | -1.338427 | 1.262484              |              |
| H                           | -4.575214 | -1.521065 | -1.282179             |              |
| 28                          |           |           |                       |              |
| Dimer 211 of the n...z type |           |           |                       |              |
| C                           | -2.378823 | -0.395081 | 0.861905              |              |
| C                           | -3.854425 | 0.046465  | 0.844407              |              |
| N                           | -1.511958 | 0.650979  | 1.359438              |              |
| H                           | -1.555037 | 1.465150  | 0.753575              |              |
| H                           | -0.543433 | 0.333418  | 1.404889              |              |
| H                           | -2.324766 | -1.249971 | 1.546982              |              |
| C                           | -1.975957 | -0.954150 | -0.507108             |              |
| O                           | -1.061289 | -0.542912 | -1.194326             |              |
| O                           | -2.751946 | -1.974521 | -0.887016             |              |
| H                           | -2.455505 | -2.299179 | -1.753299             |              |
| H                           | -4.507254 | -0.783270 | 0.581813              |              |
| H                           | -4.115459 | 0.396753  | 1.842551              |              |
| S                           | -4.218068 | 1.470732  | -0.272012             |              |
| H                           | -4.170139 | 0.790513  | -1.435896             |              |
| C                           | 2.051537  | -1.017358 | 0.635983              |              |
| C                           | 2.289159  | -0.381565 | -0.767938             |              |
| O                           | 1.286861  | -0.387059 | 1.408462              |              |
| O                           | 2.675751  | -2.075911 | 0.838496              |              |
| H                           | 2.011102  | -1.107722 | -1.533397             |              |
| C                           | 3.748172  | 0.019888  | -0.978788             |              |
| N                           | 1.370240  | 0.795652  | -0.939112             |              |
| H                           | 1.530613  | 1.291690  | -1.817454             |              |
| H                           | 3.904922  | 0.418900  | -1.982467             |              |
| H                           | 4.363170  | -0.870225 | -0.864487             |              |
| S                           | 4.354479  | 1.335721  | 0.162466              |              |
| H                           | 0.385622  | 0.468574  | -0.919968             |              |
| H                           | 1.505885  | 1.447078  | -0.161796             |              |
| H                           | 4.306736  | 0.602643  | 1.293714              |              |
| 28                          |           |           |                       |              |
| Dimer 212 of the n...z type |           |           |                       |              |
| C                           | -2.891668 | 0.873172  | 0.338878              |              |
| C                           | -2.992594 | -0.450528 | 1.113655              |              |
| N                           | -3.532725 | 0.898952  | -0.979052             |              |
| H                           | -3.606952 | -0.040667 | -1.362324             |              |
| H                           | -4.458968 | 1.306868  | -0.944143             |              |
| H                           | -3.345326 | 1.648227  | 0.965821              |              |
| C                           | -1.424485 | 1.314647  | 0.186835              |              |
| O                           | -0.621527 | 1.295462  | 1.096272              |              |
| O                           | -1.116228 | 1.751002  | -1.030368             |              |
| H                           | -1.963869 | 1.646710  | -1.543347             |              |

| Nov 11, 22 15:56            | dimers_structures.xyz |           | Page 199/325 |
|-----------------------------|-----------------------|-----------|--------------|
| H                           | -2.389074             | -0.392835 | 2.018244     |
| H                           | -4.030823             | -0.619873 | 1.399937     |
| S                           | -2.521317             | -1.947140 | 0.147304     |
| H                           | -1.202661             | -1.678022 | -0.047034    |
| C                           | 1.796232              | -1.826393 | -0.416269    |
| C                           | 2.027166              | -0.460193 | 0.299018     |
| O                           | 2.804989              | -2.566909 | -0.507081    |
| O                           | 0.641101              | -2.008906 | -0.853560    |
| H                           | 1.224095              | -0.252234 | 1.001534     |
| C                           | 2.116208              | 0.657951  | -0.740580    |
| N                           | 3.316647              | -0.562755 | 1.068978     |
| H                           | 3.168737              | -0.933872 | 2.007685     |
| H                           | 1.169125              | 0.706087  | -1.272669    |
| H                           | 2.912165              | 0.455599  | -1.460124    |
| S                           | 2.494167              | 2.314233  | -0.028753    |
| H                           | 3.898148              | -1.245528 | 0.555893     |
| H                           | 3.780420              | 0.347872  | 1.155362     |
| H                           | 1.340084              | 2.407671  | 0.667557     |
| 28                          |                       |           |              |
| Dimer 213 of the n...z type |                       |           |              |
| C                           | 2.838900              | -0.721407 | 0.196388     |
| C                           | 2.285595              | -0.804289 | -1.232810    |
| N                           | 1.834642              | -0.993639 | 1.233146     |
| H                           | 1.003145              | -1.450218 | 0.849620     |
| H                           | 2.214888              | -1.597997 | 1.953451     |
| H                           | 3.671840              | -1.431919 | 0.240396     |
| C                           | 3.459941              | 0.667814  | 0.437890     |
| O                           | 4.367753              | 1.116760  | -0.226254    |
| O                           | 2.893990              | 1.343960  | 1.435638     |
| H                           | 2.186604              | 0.729920  | 1.769832     |
| H                           | 3.094975              | -0.663712 | -1.946557    |
| H                           | 1.843268              | -1.786967 | -1.394556    |
| S                           | 0.943003              | 0.390174  | -1.656037    |
| H                           | 1.693111              | 1.511493  | -1.637453    |
| C                           | -1.879987             | -1.814677 | 0.159711     |
| C                           | -2.302395             | -0.382123 | 0.617470     |
| O                           | -0.646147             | -2.055803 | 0.140720     |
| O                           | -2.828343             | -2.561311 | -0.141453    |
| H                           | -2.914049             | -0.472687 | 1.515878     |
| C                           | -3.082207             | 0.343358  | -0.478044    |
| N                           | -1.089301             | 0.419053  | 0.998966     |
| H                           | -0.580140             | -0.016687 | 1.768858     |
| H                           | -3.944838             | -0.262940 | -0.742145    |
| H                           | -2.468468             | 0.468599  | -1.372430    |
| S                           | -3.627483             | 2.046534  | -0.025655    |
| H                           | -0.422987             | 0.473895  | 0.203518     |
| H                           | -1.354817             | 1.371167  | 1.269838     |
| H                           | -4.505334             | 1.681929  | 0.931194     |
| 28                          |                       |           |              |
| Dimer 214 of the n...z type |                       |           |              |
| C                           | 3.006381              | 0.248329  | -0.377674    |
| C                           | 1.926931              | -0.396529 | -1.252074    |
| N                           | 4.205047              | -0.548239 | -0.109225    |
| H                           | 3.986867              | -1.540235 | -0.060156    |
| H                           | 4.912226              | -0.416213 | -0.822440    |
| H                           | 3.318554              | 1.165612  | -0.889909    |
| C                           | 2.426707              | 0.740800  | 0.964139     |
| O                           | 1.312998              | 1.205058  | 1.089426     |
| O                           | 3.273049              | 0.633127  | 1.982303     |
| H                           | 4.066701              | 0.176398  | 1.597909     |
| H                           | 1.113430              | 0.308024  | -1.412808    |
| H                           | 2.350790              | -0.661236 | -2.220452    |
| S                           | 1.251247              | -1.983058 | -0.585739    |
| H                           | 0.930213              | -1.529726 | 0.644478     |
| C                           | -3.269209             | -0.797005 | 0.871489     |
| C                           | -2.107294             | -0.076972 | 0.104991     |
| O                           | -3.879889             | -1.676962 | 0.210609     |
| O                           | -3.465270             | -0.401901 | 2.034082     |
| H                           | -1.192672             | -0.142344 | 0.692322     |

| Nov 11, 22 15:56            | dimers_structures.xyz |           | Page 200/325 |
|-----------------------------|-----------------------|-----------|--------------|
| C                           | -2.455435             | 1.387906  | -0.149591    |
| N                           | -1.894102             | -0.827674 | -1.182052    |
| H                           | -1.045415             | -1.411881 | -1.144094    |
| H                           | -2.604000             | 1.872492  | 0.812758     |
| H                           | -3.381839             | 1.474423  | -0.721453    |
| S                           | -1.190368             | 2.306811  | -1.127575    |
| H                           | -2.730826             | -1.442009 | -1.253726    |
| H                           | -1.809571             | -0.209865 | -1.992566    |
| H                           | -0.160716             | 2.094154  | -0.276952    |
| 28                          |                       |           |              |
| Dimer 215 of the n...z type |                       |           |              |
| C                           | -1.789440             | 0.387136  | 0.291721     |
| C                           | -1.619434             | -0.370380 | -1.030443    |
| N                           | -1.957046             | -0.430093 | 1.495013     |
| H                           | -2.463585             | -1.284657 | 1.275968     |
| H                           | -1.037419             | -0.679130 | 1.864888     |
| H                           | -0.883114             | 0.988373  | 0.431141     |
| C                           | -2.930989             | 1.416620  | 0.223398     |
| O                           | -3.186213             | 2.086887  | -0.753613    |
| O                           | -3.604973             | 1.528049  | 1.367899     |
| H                           | -3.190231             | 0.832225  | 1.950082     |
| H                           | -1.459029             | 0.327374  | -1.850837    |
| H                           | -0.755126             | -1.029228 | -0.946335    |
| S                           | -3.032168             | -1.478325 | -1.453542    |
| H                           | -3.926317             | -0.504962 | -1.722775    |
| C                           | 1.472231              | -1.119545 | 1.006765     |
| C                           | 2.818691              | -0.470335 | 0.552948     |
| O                           | 1.056599              | -2.056769 | 0.284405     |
| O                           | 0.939513              | -0.595795 | 2.006304     |
| H                           | 3.483350              | -0.339037 | 1.404331     |
| C                           | 2.533832              | 0.871417  | -0.123800    |
| N                           | 3.471829              | -1.422536 | -0.411952    |
| H                           | 4.079089              | -2.089119 | 0.065712     |
| H                           | 2.060878              | 1.526630  | 0.604418     |
| H                           | 1.846648              | 0.741017  | -0.962532    |
| S                           | 4.012447              | 1.697828  | -0.847384    |
| H                           | 2.696263              | -1.960386 | -0.836256    |
| H                           | 4.030659              | -0.933672 | -1.118858    |
| H                           | 4.681238              | 1.872483  | 0.310950     |
| 28                          |                       |           |              |
| Dimer 216 of the n...z type |                       |           |              |
| C                           | -1.624025             | -0.869618 | -0.271452    |
| C                           | -1.973742             | 0.400379  | -1.058590    |
| N                           | -2.563675             | -1.986435 | -0.402784    |
| H                           | -3.507733             | -1.654075 | -0.583740    |
| H                           | -2.296989             | -2.616157 | -1.149881    |
| H                           | -0.636220             | -1.211561 | -0.611033    |
| C                           | -1.420581             | -0.566675 | 1.220859     |
| O                           | -0.824842             | 0.408019  | 1.634753     |
| O                           | -1.915176             | -1.494862 | 2.032628     |
| H                           | -2.348308             | -2.146009 | 1.417473     |
| H                           | -1.232327             | 1.177722  | -0.883828    |
| H                           | -1.989819             | 0.171181  | -2.124207    |
| S                           | -3.642527             | 1.093715  | -0.688283    |
| H                           | -3.359228             | 1.530328  | 0.556050     |
| C                           | 2.464889              | -1.415416 | -0.582667    |
| C                           | 2.219017              | -0.085701 | 0.201965     |
| O                           | 3.668134              | -1.748810 | -0.712772    |
| O                           | 1.434584              | -1.968038 | -1.014940    |
| H                           | 1.450178              | -0.231072 | 0.956962     |
| C                           | 1.810703              | 1.021750  | -0.765946    |
| N                           | 3.501862              | 0.272305  | 0.905053     |
| H                           | 3.534630              | -0.108995 | 1.850902     |
| H                           | 0.959144              | 0.670675  | -1.344061    |
| H                           | 2.617569              | 1.241355  | -1.468127    |
| S                           | 1.403838              | 2.623484  | 0.047363     |
| H                           | 4.249082              | -0.190610 | 0.356950     |
| H                           | 3.645554              | 1.283824  | 0.969666     |
| H                           | 0.407011              | 2.128337  | 0.813357     |

| Nov 11, 22 15:56       | dimers_structures.xyz | Page 201/325 |
|------------------------|-----------------------|--------------|
| 28                     |                       |              |
| Dimer 217 of the n...z | type                  |              |
| C                      | 2.670222              | -0.910239    |
| C                      | 3.315801              | 0.402381     |
| N                      | 1.796346              | -1.579111    |
| H                      | 1.300294              | -0.902734    |
| H                      | 2.316132              | -2.193995    |
| H                      | 3.483711              | -1.599053    |
| C                      | 1.907044              | -0.703991    |
| O                      | 2.286630              | 0.006345     |
| O                      | 0.764465              | -1.400996    |
| H                      | 0.640990              | -1.869953    |
| H                      | 3.975266              | 0.799434     |
| H                      | 3.903158              | 0.212207     |
| S                      | 2.100120              | 1.706638     |
| H                      | 1.721242              | 2.031529     |
| C                      | -2.263490             | -1.533978    |
| C                      | -2.487733             | -0.214021    |
| O                      | -1.544846             | -2.402569    |
| O                      | -2.822630             | -1.554119    |
| H                      | -3.558717             | -0.037984    |
| C                      | -1.826439             | 0.971635     |
| N                      | -1.943195             | -0.369953    |
| H                      | -2.487260             | -1.053435    |
| H                      | -2.248397             | 1.053352     |
| H                      | -0.750056             | 0.823257     |
| S                      | -1.997458             | 2.581601     |
| H                      | -0.970534             | -0.718749    |
| H                      | -1.968441             | 0.525525     |
| H                      | -3.333420             | 2.702233     |
| 28                     |                       |              |
| Dimer 218 of the n...z | type                  |              |
| C                      | 1.438853              | -0.250052    |
| C                      | 2.090539              | 1.046971     |
| N                      | 0.621920              | -0.008060    |
| H                      | 1.200606              | 0.268633     |
| H                      | 0.111917              | -0.846462    |
| H                      | 0.772065              | -0.604027    |
| C                      | 2.476667              | -1.355613    |
| O                      | 2.678094              | -1.949703    |
| O                      | 3.152094              | -1.606030    |
| H                      | 3.794247              | -2.314870    |
| H                      | 2.614186              | 0.874126     |
| H                      | 1.306398              | 1.784844     |
| S                      | 3.248027              | 1.850291     |
| H                      | 4.266193              | 0.976157     |
| C                      | -2.070375             | -1.395533    |
| C                      | -3.176022             | -0.362738    |
| O                      | -2.108537             | -1.801344    |
| O                      | -1.280157             | -1.708769    |
| H                      | -3.855313             | -0.861723    |
| C                      | -2.625090             | 0.902062     |
| N                      | -3.952410             | -0.046373    |
| H                      | -4.963213             | -0.037525    |
| H                      | -3.428570             | 1.475682     |
| H                      | -1.927223             | 0.591122     |
| S                      | -1.799951             | 2.073167     |
| H                      | -3.658156             | -0.780731    |
| H                      | -3.643930             | 0.861666     |
| H                      | -0.784385             | 1.235007     |
| 28                     |                       |              |
| Dimer 219 of the n...z | type                  |              |
| C                      | -2.864078             | 0.726569     |
| C                      | -2.333378             | -0.440356    |
| N                      | -4.042454             | 0.443889     |
| H                      | -4.077028             | -0.540569    |
| H                      | -4.904020             | 0.681562     |
| H                      | -3.113826             | 1.538639     |
| C                      | -1.759289             | 1.317258     |

| Nov 11, 22 15:56       | dimers_structures.xyz | Page 202/325 |
|------------------------|-----------------------|--------------|
| O                      | -0.625158             | 1.514689     |
| O                      | -2.168637             | 1.629480     |
| H                      | -3.121839             | 1.346200     |
| H                      | -1.418615             | -0.141855    |
| H                      | -3.077139             | -0.702584    |
| S                      | -2.035908             | -1.997129    |
| H                      | -0.947031             | -1.604834    |
| C                      | 1.796158              | -1.640437    |
| C                      | 1.938647              | -0.399029    |
| O                      | 2.771322              | -2.428822    |
| O                      | 0.744290              | -1.683355    |
| H                      | 1.005776              | -0.191354    |
| C                      | 2.357498              | 0.816667     |
| N                      | 2.989628              | -0.722487    |
| H                      | 2.593574              | -1.206184    |
| H                      | 1.563823              | 1.025416     |
| H                      | 3.281236              | 0.614811     |
| S                      | 2.690346              | 2.330585     |
| H                      | 3.646167              | -1.373961    |
| H                      | 3.464303              | 0.122511     |
| H                      | 1.415515              | 2.507125     |
| 28                     |                       |              |
| Dimer 220 of the n...z | type                  |              |
| C                      | -2.825878             | -0.227087    |
| C                      | -3.407163             | -0.863702    |
| N                      | -1.790162             | -1.058438    |
| H                      | -1.021631             | -1.229938    |
| H                      | -1.395502             | -0.624372    |
| H                      | -3.658494             | -0.159002    |
| C                      | -2.407657             | 1.218325     |
| O                      | -1.267550             | 1.633023     |
| O                      | -3.464720             | 1.994433     |
| H                      | -3.157755             | 2.894242     |
| H                      | -4.293031             | -0.325663    |
| H                      | -3.686317             | -1.891620    |
| S                      | -2.229681             | -0.982787    |
| H                      | -2.368107             | 0.285272     |
| C                      | 1.868961              | -1.141745    |
| C                      | 1.743085              | 0.392099     |
| O                      | 1.013283              | -1.855922    |
| O                      | 2.764410              | -1.479487    |
| H                      | 1.135603              | 0.813383     |
| C                      | 3.066090              | 1.142102     |
| N                      | 0.936794              | 0.553167     |
| H                      | 0.247591              | 1.303953     |
| H                      | 2.903914              | 2.210857     |
| H                      | 3.590736              | 0.995746     |
| S                      | 4.152810              | 0.614275     |
| H                      | 0.437608              | -0.347374    |
| H                      | 1.542200              | 0.699583     |
| H                      | 4.338677              | -0.648307    |
| 28                     |                       |              |
| Dimer 221 of the n...z | type                  |              |
| C                      | 2.799161              | 0.507619     |
| C                      | 1.301290              | 0.539548     |
| N                      | 3.677068              | 1.248846     |
| H                      | 3.330444              | 1.215662     |
| H                      | 3.762015              | 2.221460     |
| H                      | 2.919305              | 0.933058     |
| C                      | 3.319980              | -0.937004    |
| O                      | 2.677368              | -1.842295    |
| O                      | 4.566142              | -1.098365    |
| H                      | 4.813464              | -0.212830    |
| H                      | 0.743961              | -0.004458    |
| H                      | 0.939396              | 1.566590     |
| S                      | 0.878941              | -0.147692    |
| H                      | 1.038270              | -1.450653    |
| C                      | -1.895749             | 1.759332     |
| C                      | -2.726874             | 0.589035     |

| Nov 11, 22 15:56            |           | dimers_structures.xyz |           | Page 203/325 |
|-----------------------------|-----------|-----------------------|-----------|--------------|
| O                           | -1.353464 | 2.536062              | -0.156504 |              |
| O                           | -1.887588 | 1.792609              | 1.911101  |              |
| H                           | -3.783515 | 0.849212              | 0.123427  |              |
| C                           | -2.461440 | -0.757899             | 0.698057  |              |
| N                           | -2.424226 | 0.524890              | -1.435641 |              |
| H                           | -2.489709 | 1.465752              | -1.830873 |              |
| H                           | -2.662257 | -0.663076             | 1.761714  |              |
| H                           | -1.417136 | -1.051015             | 0.577918  |              |
| S                           | -3.432871 | -2.161305             | -0.003563 |              |
| H                           | -1.446347 | 0.215935              | -1.583039 |              |
| H                           | -3.050527 | -0.117125             | -1.926481 |              |
| H                           | -4.642255 | -1.748576             | 0.428029  |              |
| 28                          |           |                       |           |              |
| Dimer 222 of the n...z type |           |                       |           |              |
| C                           | 1.726713  | -0.198494             | 0.425420  |              |
| C                           | 3.054865  | -0.780101             | 0.923366  |              |
| N                           | 1.053028  | -0.937089             | -0.643707 |              |
| H                           | 1.710943  | -1.486674             | -1.188718 |              |
| H                           | 0.313594  | -1.539364             | -0.274361 |              |
| H                           | 1.055102  | -0.161844             | 1.291138  |              |
| C                           | 1.883865  | 1.274560              | -0.006323 |              |
| O                           | 2.525985  | 2.097412              | 0.607134  |              |
| O                           | 1.206503  | 1.565745              | -1.117835 |              |
| H                           | 0.839965  | 0.676178              | -1.394888 |              |
| H                           | 3.458407  | -0.162960             | 1.724307  |              |
| H                           | 2.885762  | -1.785526             | 1.309100  |              |
| S                           | 4.337050  | -0.977023             | -0.388075 |              |
| H                           | 4.580290  | 0.336953              | -0.571617 |              |
| C                           | -2.422759 | -1.802114             | 0.208750  |              |
| C                           | -2.393997 | -0.341334             | -0.346844 |              |
| O                           | -3.557536 | -2.323218             | 0.294384  |              |
| O                           | -1.308813 | -2.263623             | 0.538162  |              |
| H                           | -1.582303 | -0.229380             | -1.061354 |              |
| C                           | -2.242174 | 0.646554              | 0.809927  |              |
| N                           | -3.688792 | -0.100164             | -1.073384 |              |
| H                           | -3.639140 | -0.404521             | -2.046556 |              |
| H                           | -1.335702 | 0.400314              | 1.358253  |              |
| H                           | -3.082366 | 0.559124              | 1.502133  |              |
| S                           | -2.207728 | 2.419580              | 0.309838  |              |
| H                           | -4.394940 | -0.689526             | -0.603579 |              |
| H                           | -3.955512 | 0.889330              | -1.064771 |              |
| H                           | -1.041080 | 2.372793              | -0.368202 |              |
| 28                          |           |                       |           |              |
| Dimer 223 of the n...z type |           |                       |           |              |
| C                           | 2.006353  | -1.034198             | 0.287636  |              |
| C                           | 3.272192  | -1.346655             | -0.532843 |              |
| N                           | 0.821655  | -0.704464             | -0.513407 |              |
| H                           | 1.058378  | 0.006237              | -1.205457 |              |
| H                           | 0.549908  | -1.525007             | -1.050774 |              |
| H                           | 1.769374  | -1.934292             | 0.865122  |              |
| C                           | 2.325016  | 0.029203              | 1.349609  |              |
| O                           | 3.295555  | -0.076921             | 2.063583  |              |
| O                           | 1.507644  | 1.078565              | 1.480552  |              |
| H                           | 0.765080  | 1.086873              | 0.842488  |              |
| H                           | 4.085210  | -1.646835             | 0.125197  |              |
| H                           | 3.058605  | -2.167624             | -1.217914 |              |
| S                           | 3.835372  | 0.044782              | -1.602539 |              |
| H                           | 4.348755  | 0.808697              | -0.616682 |              |
| C                           | -3.936923 | -0.868948             | -0.150532 |              |
| C                           | -2.819273 | 0.108601              | 0.369061  |              |
| O                           | -3.689354 | -2.092673             | 0.007645  |              |
| O                           | -4.935007 | -0.324141             | -0.652835 |              |
| H                           | -3.242860 | 0.701699              | 1.179234  |              |
| C                           | -2.327781 | 1.018981              | -0.749179 |              |
| N                           | -1.716910 | -0.741895             | 0.939322  |              |
| H                           | -1.551172 | -0.564123             | 1.928215  |              |
| H                           | -3.186526 | 1.540431              | -1.164472 |              |
| H                           | -1.864318 | 0.439528              | -1.550141 |              |
| S                           | -1.049928 | 2.254107              | -0.256061 |              |

Nov 11, 22 15:56

dimers\_structures.xyz

Page 204/325

|                             |           |           |           |
|-----------------------------|-----------|-----------|-----------|
| H                           | -2.083631 | -1.710091 | 0.818299  |
| H                           | -0.806443 | -0.649392 | 0.428887  |
| H                           | -1.748896 | 2.835651  | 0.740129  |
| 28                          |           |           |           |
| Dimer 224 of the n...z type |           |           |           |
| C                           | -2.652261 | -0.485714 | -0.997420 |
| C                           | -3.160270 | -1.128684 | 0.296331  |
| N                           | -1.573844 | -1.190029 | -1.699260 |
| H                           | -0.996786 | -1.727472 | -1.059016 |
| H                           | -1.935838 | -1.829758 | -2.396481 |
| H                           | -3.510083 | -0.425263 | -1.676962 |
| C                           | -2.233381 | 0.980291  | -0.780104 |
| O                           | -2.793956 | 1.740545  | -0.025612 |
| O                           | -1.193291 | 1.352461  | -1.532131 |
| H                           | -0.924114 | 0.522971  | -2.007118 |
| H                           | -4.034616 | -0.595216 | 0.664400  |
| H                           | -3.443069 | -2.162253 | 0.098654  |
| S                           | -1.933488 | -1.208645 | 1.675425  |
| H                           | -1.972303 | 0.103021  | 1.987354  |
| C                           | 2.881621  | -1.224443 | -0.533327 |
| C                           | 1.858435  | -0.164349 | 0.001383  |
| O                           | 3.253260  | -2.080417 | 0.310822  |
| O                           | 3.217867  | -1.086295 | -1.722373 |
| H                           | 0.978514  | -0.169439 | -0.637644 |
| C                           | 2.479980  | 1.229921  | 0.020382  |
| N                           | 1.439627  | -0.604067 | 1.377064  |
| H                           | 0.478762  | -0.972488 | 1.388173  |
| H                           | 2.762229  | 1.489498  | -0.997353 |
| H                           | 3.380619  | 1.243390  | 0.637656  |
| S                           | 1.388600  | 2.538192  | 0.726801  |
| H                           | 2.107320  | -1.367903 | 1.609343  |
| H                           | 1.480667  | 0.152751  | 2.063649  |
| H                           | 0.370648  | 2.371583  | -0.144016 |
| 28                          |           |           |           |
| Dimer 225 of the n...z type |           |           |           |
| C                           | -2.083132 | -0.762451 | 0.301763  |
| C                           | -1.773697 | 0.333537  | 1.331853  |
| N                           | -1.216363 | -0.837534 | -0.872310 |
| H                           | -0.951688 | 0.095739  | -1.177820 |
| H                           | -0.368277 | -1.381904 | -0.692538 |
| H                           | -2.011645 | -1.720480 | 0.830653  |
| C                           | -3.550291 | -0.692552 | -0.167265 |
| O                           | -4.478412 | -0.384842 | 0.547512  |
| O                           | -3.710849 | -1.039770 | -1.443846 |
| H                           | -2.781819 | -1.191561 | -1.767572 |
| H                           | -2.517527 | 0.320057  | 2.126760  |
| H                           | -0.796036 | 0.151964  | 1.778666  |
| S                           | -1.670484 | 2.037448  | 0.635756  |
| H                           | -2.969462 | 2.156058  | 0.292247  |
| C                           | 2.306905  | -1.820335 | 0.147105  |
| C                           | 2.234543  | -0.269391 | 0.332530  |
| O                           | 3.393559  | -2.350639 | 0.470423  |
| O                           | 1.279872  | -2.342394 | -0.335923 |
| H                           | 1.302473  | 0.003336  | 0.819497  |
| C                           | 2.358685  | 0.427334  | -1.022233 |
| N                           | 3.362583  | 0.136397  | 1.241265  |
| H                           | 3.087245  | 0.102412  | 2.223396  |
| H                           | 1.561353  | 0.070380  | -1.669998 |
| H                           | 3.309750  | 0.176950  | -1.496566 |
| S                           | 2.322371  | 2.267209  | -0.943977 |
| H                           | 4.103597  | -0.571399 | 1.104089  |
| H                           | 3.698307  | 1.083777  | 1.040954  |
| H                           | 1.048551  | 2.382431  | -0.510748 |
| 28                          |           |           |           |
| Dimer 226 of the n...z type |           |           |           |
| C                           | -2.772788 | -0.959652 | 0.213897  |
| C                           | -3.462286 | 0.412681  | 0.253500  |
| N                           | -2.010998 | -1.326813 | 1.404172  |
| H                           | -1.598011 | -0.509800 | 1.846043  |

| Nov 11, 22 15:56            | dimers_structures.xyz |           | Page 205/325 |
|-----------------------------|-----------------------|-----------|--------------|
| H                           | -2.590299             | -1.795165 | 2.090170     |
| H                           | -3.558367             | -1.709815 | 0.068152     |
| C                           | -1.885460             | -1.089604 | -1.037794    |
| O                           | -2.227113             | -0.691953 | -2.131226    |
| O                           | -0.715362             | -1.692169 | -0.846816    |
| H                           | -0.617498             | -1.882755 | 0.118356     |
| H                           | -4.033172             | 0.581799  | -0.657690    |
| H                           | -4.142854             | 0.447323  | 1.104364     |
| S                           | -2.298739             | 1.823939  | 0.502237     |
| H                           | -1.771165             | 1.816728  | -0.738402    |
| C                           | 2.230248              | -1.515121 | 0.431736     |
| C                           | 2.520087              | 0.022571  | 0.507573     |
| O                           | 2.889484              | -2.138633 | -0.435712    |
| O                           | 1.351387              | -1.929349 | 1.210883     |
| H                           | 2.670517              | 0.330777  | 1.540229     |
| C                           | 1.358905              | 0.792927  | -0.119856    |
| N                           | 3.797546              | 0.272640  | -0.248617    |
| H                           | 4.614576              | 0.227136  | 0.360759     |
| H                           | 0.465700              | 0.610785  | 0.472085     |
| H                           | 1.165717              | 0.442568  | -1.135149    |
| S                           | 1.623376              | 2.607708  | -0.279237    |
| H                           | 3.868061              | -0.512112 | -0.921857    |
| H                           | 3.798721              | 1.185037  | -0.715779    |
| H                           | 1.708645              | 2.874367  | 1.040469     |
| 28                          |                       |           |              |
| Dimer 227 of the n...z type |                       |           |              |
| C                           | 2.533773              | -0.376474 | -0.793419    |
| C                           | 3.029889              | 0.808358  | 0.044538     |
| N                           | 1.547432              | -0.094808 | -1.837905    |
| H                           | 0.871696              | 0.635503  | -1.592887    |
| H                           | 1.990316              | 0.163746  | -2.711123    |
| H                           | 3.417424              | -0.806593 | -1.280410    |
| C                           | 1.992947              | -1.518751 | 0.087919     |
| O                           | 2.450637              | -1.828634 | 1.163945     |
| O                           | 0.965417              | -2.163941 | -0.473148    |
| H                           | 0.821843              | -1.666038 | -1.328011    |
| H                           | 3.880173              | 0.508390  | 0.654955     |
| H                           | 3.354092              | 1.604474  | -0.625604    |
| S                           | 1.769764              | 1.575997  | 1.154200     |
| H                           | 1.826166              | 0.635012  | 2.117999     |
| C                           | -1.513360             | 1.772147  | -0.592146    |
| C                           | -1.570612             | 0.405518  | 0.162900     |
| O                           | -2.251670             | 2.672778  | -0.128622    |
| O                           | -0.763936             | 1.795284  | -1.589696    |
| H                           | -0.563659             | 0.028169  | 0.317276     |
| C                           | -2.411482             | -0.600108 | -0.620538    |
| N                           | -2.169758             | 0.661204  | 1.518058     |
| H                           | -1.454757             | 0.921801  | 2.198521     |
| H                           | -1.960676             | -0.731769 | -1.602140    |
| H                           | -3.428861             | -0.230198 | -0.762038    |
| S                           | -2.596129             | -2.235298 | 0.211026     |
| H                           | -2.793977             | 1.476534  | 1.399920     |
| H                           | -2.670241             | -0.157071 | 1.879669     |
| H                           | -1.281927             | -2.545948 | 0.213831     |
| 28                          |                       |           |              |
| Dimer 228 of the n...z type |                       |           |              |
| C                           | 2.921888              | 0.627662  | 0.434379     |
| C                           | 1.870198              | -0.290452 | 1.068219     |
| N                           | 2.366918              | 1.574534  | -0.543203    |
| H                           | 1.347389              | 1.635272  | -0.510311    |
| H                           | 2.731837              | 2.508063  | -0.390504    |
| H                           | 3.417820              | 1.146085  | 1.262152     |
| C                           | 4.012189              | -0.217529 | -0.253311    |
| O                           | 4.710072              | -1.015386 | 0.334515     |
| O                           | 4.106125              | 0.001346  | -1.561776    |
| H                           | 3.404457              | 0.693461  | -1.729703    |
| H                           | 2.336369              | -0.926626 | 1.816999     |
| H                           | 1.102463              | 0.314334  | 1.550073     |
| S                           | 0.988855              | -1.389054 | -0.140212    |

| Nov 11, 22 15:56            | dimers_structures.xyz |           | Page 206/325 |
|-----------------------------|-----------------------|-----------|--------------|
| H                           | 1.695178              | -2.511595 | 0.091978     |
| C                           | -1.229022             | 1.131211  | 0.428345     |
| C                           | -2.231252             | 0.046941  | -0.078184    |
| O                           | -1.114086             | 1.206173  | 1.674019     |
| O                           | -0.658679             | 1.800664  | -0.458931    |
| H                           | -1.888746             | -0.370068 | -1.023069    |
| C                           | -3.630039             | 0.643580  | -0.219104    |
| N                           | -2.231146             | -1.065135 | 0.931973     |
| H                           | -1.371024             | -1.620135 | 0.831310     |
| H                           | -3.593813             | 1.446724  | -0.952937    |
| H                           | -3.964815             | 1.063705  | 0.731286     |
| S                           | -4.932506             | -0.571650 | -0.694759    |
| H                           | -2.206620             | -0.633134 | 1.865064     |
| H                           | -3.049763             | -1.673595 | 0.830071     |
| H                           | -4.443932             | -0.857878 | -1.918942    |
| 28                          |                       |           |              |
| Dimer 229 of the n...z type |                       |           |              |
| C                           | -1.607171             | -0.131744 | 0.352101     |
| C                           | -2.385283             | 1.194232  | 0.419389     |
| N                           | -0.715390             | -0.169207 | -0.791748    |
| H                           | -1.244041             | -0.177369 | -1.658856    |
| H                           | -0.126274             | -0.999648 | -0.756605    |
| H                           | -0.997112             | -0.173820 | 1.262167     |
| C                           | -2.557782             | -1.330238 | 0.432210     |
| O                           | -2.654392             | -2.199450 | -0.400963    |
| O                           | -3.290477             | -1.303497 | 1.562903     |
| H                           | -3.879023             | -2.075372 | 1.574887     |
| H                           | -2.968837             | 1.253572  | 1.335728     |
| H                           | -1.668103             | 2.014592  | 0.408887     |
| S                           | -3.494890             | 1.511200  | -1.020100    |
| H                           | -4.458153             | 0.627171  | -0.688017    |
| C                           | 2.531429              | -1.273375 | -0.426037    |
| C                           | 3.282857              | -0.306637 | 0.548429     |
| O                           | 3.007144              | -1.342362 | -1.586589    |
| O                           | 1.561116              | -1.884011 | 0.063719     |
| H                           | 3.860099              | -0.927723 | 1.236263     |
| C                           | 2.370170              | 0.616117  | 1.355582     |
| N                           | 4.266335              | 0.471837  | -0.282243    |
| H                           | 5.168784              | 0.620419  | 0.167353     |
| H                           | 2.934024              | 1.128951  | 2.135411     |
| H                           | 1.607473              | 0.001090  | 1.828309     |
| S                           | 1.571668              | 1.949300  | 0.362077     |
| H                           | 4.360040              | -0.082249 | -1.155223    |
| H                           | 3.857013              | 1.380824  | -0.536092    |
| H                           | 0.676600              | 1.147583  | -0.310511    |
| 28                          |                       |           |              |
| Dimer 230 of the n...z type |                       |           |              |
| C                           | 2.497439              | -0.609668 | -0.346599    |
| C                           | 2.090977              | 0.730665  | -0.973638    |
| N                           | 1.499837              | -1.327210 | 0.446771     |
| H                           | 1.002291              | -0.688110 | 1.062234     |
| H                           | 0.806694              | -1.778696 | -0.146200    |
| H                           | 2.776270              | -1.262405 | -1.183219    |
| C                           | 3.791792              | -0.490168 | 0.480554     |
| O                           | 4.686033              | 0.287628  | 0.236200     |
| O                           | 3.861083              | -1.363920 | 1.487237     |
| H                           | 2.985780              | -1.828354 | 1.475440     |
| H                           | 2.941516              | 1.161391  | -1.499552    |
| H                           | 1.276348              | 0.570809  | -1.680910    |
| S                           | 1.422870              | 1.987044  | 0.198332     |
| H                           | 2.430585              | 1.980738  | 1.094455     |
| C                           | -1.318803             | -0.644458 | -1.294079    |
| C                           | -2.106602             | -0.169597 | -0.030077    |
| O                           | -1.111079             | 0.238105  | -2.159484    |
| O                           | -0.996433             | -1.850237 | -1.297044    |
| H                           | -1.657900             | -0.585393 | 0.870397     |
| C                           | -3.572578             | -0.588532 | -0.134199    |
| N                           | -1.988612             | 1.326762  | 0.049820     |
| H                           | -1.085391             | 1.602679  | 0.453465     |



| Nov 11, 22 15:56            | dimers_structures.xyz |           | Page 207/325 |
|-----------------------------|-----------------------|-----------|--------------|
| H -3.617464                 | -1.674489             | -0.184946 |              |
| H -4.024932                 | -0.185860             | -1.042540 |              |
| S -4.638178                 | 0.018189              | 1.241646  |              |
| H -2.000909                 | 1.680017              | -0.917377 |              |
| H -2.743922                 | 1.739287              | 0.607573  |              |
| H -4.032796                 | -0.674260             | 2.228354  |              |
| 28                          |                       |           |              |
| Dimer 231 of the n...z type |                       |           |              |
| C 2.921623                  | -0.633613             | -0.427157 |              |
| C 1.865680                  | 0.277788              | -1.063527 |              |
| N 2.373215                  | -1.571801             | 0.562035  |              |
| H 1.354468                  | -1.645323             | 0.528023  |              |
| H 2.749818                  | -2.503131             | 0.424561  |              |
| H 3.413829                  | -1.158251             | -1.253288 |              |
| C 4.014027                  | 0.219619              | 0.247157  |              |
| O 4.711804                  | 1.008543              | -0.352700 |              |
| O 4.109473                  | 0.019265              | 1.558515  |              |
| H 3.407871                  | -0.670028             | 1.737277  |              |
| H 2.328101                  | 0.908050              | -1.819608 |              |
| H 1.096794                  | -0.331679             | -1.537396 |              |
| S 0.988589                  | 1.386063              | 0.139048  |              |
| H 1.691888                  | 2.507469              | -0.107580 |              |
| C -1.229627                 | -1.129410             | -0.429466 |              |
| C -2.232642                 | -0.046276             | 0.077862  |              |
| O -1.121269                 | -1.208958             | -1.675441 |              |
| O -0.651845                 | -1.793097             | 0.457257  |              |
| H -1.890283                 | 0.370766              | 1.022782  |              |
| C -3.631099                 | -0.643567             | 0.218543  |              |
| N -2.233010                 | 1.066147              | -0.931936 |              |
| H -1.371569                 | 1.619371              | -0.832421 |              |
| H -3.594668                 | -1.446984             | 0.952100  |              |
| H -3.965597                 | -1.063483             | -0.732027 |              |
| S -4.934059                 | 0.570955              | 0.694681  |              |
| H -2.211335                 | 0.634814              | -1.865347 |              |
| H -3.050419                 | 1.675882              | -0.828137 |              |
| H -4.445900                 | 0.856543              | 1.919174  |              |
| 28                          |                       |           |              |
| Dimer 232 of the n...z type |                       |           |              |
| C 2.125599                  | 0.785292              | 0.254334  |              |
| C 1.746366                  | -0.191250             | 1.377489  |              |
| N 1.246753                  | 0.840141              | -0.911713 |              |
| H 0.938998                  | -0.095758             | -1.164949 |              |
| H 0.419603                  | 1.419902              | -0.745010 |              |
| H 2.143271                  | 1.786009              | 0.702885  |              |
| C 3.572436                  | 0.557746              | -0.225898 |              |
| O 4.481427                  | 0.207873              | 0.493533  |              |
| O 3.744193                  | 0.820359              | -1.521871 |              |
| H 2.829973                  | 1.034708              | -1.847976 |              |
| H 2.514069                  | -0.188527             | 2.149474  |              |
| H 0.807198                  | 0.122909              | 1.833096  |              |
| S 1.454732                  | -1.926605             | 0.827442  |              |
| H 2.714945                  | -2.187464             | 0.423535  |              |
| C -2.237230                 | 1.827582              | 0.151535  |              |
| C -2.159064                 | 0.272043              | 0.293717  |              |
| O -3.301441                 | 2.349756              | 0.553761  |              |
| O -1.240951                 | 2.361823              | -0.379655 |              |
| H -1.196741                 | -0.017801             | 0.706808  |              |
| C -2.378223                 | -0.393132             | -1.064762 |              |
| N -3.225529                 | -0.150856             | 1.266564  |              |
| H -2.883685                 | -0.150122             | 2.228312  |              |
| H -1.622235                 | -0.027161             | -1.756099 |              |
| H -3.357616                 | -0.128367             | -1.468162 |              |
| S -2.349894                 | -2.234809             | -1.020012 |              |
| H -3.964444                 | 0.569894              | 1.200324  |              |
| H -3.585596                 | -1.088043             | 1.060040  |              |
| H -1.068837                 | -2.360711             | -0.609745 |              |
| 28                          |                       |           |              |
| Dimer 233 of the n...z type |                       |           |              |
| C 3.258892                  | 0.682883              | -0.216794 |              |

| Nov 11, 22 15:56            | dimers_structures.xyz |           | Page 208/325 |
|-----------------------------|-----------------------|-----------|--------------|
| C 1.760609                  | 0.677283              | 0.106726  |              |
| N 3.624307                  | 0.617222              | -1.633358 |              |
| H 2.964133                  | 0.048348              | -2.157669 |              |
| H 3.654594                  | 1.536839              | -2.057366 |              |
| H 3.666952                  | 1.614550              | 0.191823  |              |
| C 4.005902                  | -0.429492             | 0.544727  |              |
| O 3.725462                  | -0.779260             | 1.669050  |              |
| O 5.019818                  | -0.958126             | -0.139606 |              |
| H 4.979073                  | -0.516678             | -1.026470 |              |
| H 1.601501                  | 0.753793              | 1.180476  |              |
| H 1.280410                  | 1.526361              | -0.378393 |              |
| S 0.865625                  | -0.809649             | -0.523314 |              |
| H 1.404837                  | -1.699257             | 0.335849  |              |
| C -3.955981                 | -1.066014             | -0.324255 |              |
| C -3.139049                 | 0.022142              | 0.459692  |              |
| O -3.698767                 | -2.254873             | -0.002548 |              |
| O -4.780700                 | -0.631797             | -1.147550 |              |
| H -3.812440                 | 0.459785              | 1.198129  |              |
| C -2.571772                 | 1.108598              | -0.443080 |              |
| N -2.060876                 | -0.699818             | 1.223056  |              |
| H -2.390144                 | -1.683880             | 1.249325  |              |
| H -3.394039                 | 1.573261              | -0.980744 |              |
| H -1.887954                 | 0.682933              | -1.179977 |              |
| S -1.591561                 | 2.398532              | 0.438763  |              |
| H -1.155807                 | -0.688465             | 0.722574  |              |
| H -1.910306                 | -0.332354             | 2.161126  |              |
| H -2.607953                 | 2.900863              | 1.169362  |              |
| 28                          |                       |           |              |
| Dimer 234 of the n...z type |                       |           |              |
| C 2.019480                  | -1.096327             | 0.100278  |              |
| C 3.305451                  | -1.210044             | -0.740767 |              |
| N 0.835065                  | -0.658167             | -0.647958 |              |
| H 1.064249                  | 0.159602              | -1.213013 |              |
| H 0.581181                  | -1.385177             | -1.313677 |              |
| H 1.806164                  | -2.095220             | 0.494991  |              |
| C 2.294382                  | -0.243585             | 1.348246  |              |
| O 3.238018                  | -0.482771             | 2.066549  |              |
| O 1.472862                  | 0.770065              | 1.636216  |              |
| H 0.756741                  | 0.902438              | 0.980976  |              |
| H 4.120339                  | -1.602155             | -0.135261 |              |
| H 3.128351                  | -1.894560             | -1.570812 |              |
| S 3.833008                  | 0.374286              | -1.521708 |              |
| H 4.302273                  | 0.959589              | -0.400607 |              |
| C -3.967565                 | -0.787472             | -0.239920 |              |
| C -2.797609                 | 0.060708              | 0.380358  |              |
| O -3.749872                 | -2.025092             | -0.308469 |              |
| O -4.970272                 | -0.141224             | -0.589375 |              |
| H -3.170182                 | 0.537184              | 1.286247  |              |
| C -2.311745                 | 1.113892              | -0.607484 |              |
| N -1.711064                 | -0.903608             | 0.770747  |              |
| H -1.535273                 | -0.911785             | 1.773883  |              |
| H -3.166265                 | 1.712060              | -0.914232 |              |
| H -1.888816                 | 0.648332              | -1.500010 |              |
| S -0.987848                 | 2.235586              | 0.017239  |              |
| H -2.106975                 | -1.824984             | 0.485222  |              |
| H -0.800538                 | -0.745509             | 0.276268  |              |
| H -1.662079                 | 2.723801              | 1.078368  |              |
| 28                          |                       |           |              |
| Dimer 235 of the n...z type |                       |           |              |
| C 2.236892                  | 0.048867              | -0.789432 |              |
| C 3.688041                  | -0.451454             | -0.884343 |              |
| N 2.048773                  | 1.492278              | -0.841617 |              |
| H 2.707981                  | 1.958911              | -0.223877 |              |
| H 2.207667                  | 1.842234              | -1.779629 |              |
| H 1.701381                  | -0.381588             | -1.646237 |              |
| C 1.523963                  | -0.547344             | 0.435498  |              |
| O 1.889765                  | -1.577365             | 0.965102  |              |
| O 0.447154                  | 0.092446              | 0.878590  |              |
| H 0.188854                  | 0.899246              | 0.354259  |              |

| Nov 11, 22 15:56 dimers_structures.xyz Page 209/325 |           |           |           |
|-----------------------------------------------------|-----------|-----------|-----------|
| H                                                   | 3.723529  | -1.539564 | -0.894023 |
| H                                                   | 4.128366  | -0.080368 | -1.810372 |
| S                                                   | 4.792979  | 0.168316  | 0.455612  |
| H                                                   | 4.253655  | -0.570738 | 1.445678  |
| C                                                   | -2.355029 | 1.729870  | 0.034791  |
| C                                                   | -2.633317 | 0.238390  | 0.411917  |
| O                                                   | -3.368851 | 2.440314  | -0.145512 |
| O                                                   | -1.147358 | 2.038173  | -0.079694 |
| H                                                   | -2.010822 | -0.058623 | 1.252428  |
| C                                                   | -2.363075 | -0.663842 | -0.792108 |
| N                                                   | -4.075654 | 0.143629  | 0.831833  |
| H                                                   | -4.187528 | 0.277987  | 1.837097  |
| H                                                   | -1.327792 | -0.533355 | -1.094802 |
| H                                                   | -2.999578 | -0.387631 | -1.635365 |
| S                                                   | -2.700657 | -2.449669 | -0.493348 |
| H                                                   | -4.555342 | 0.928587  | 0.358026  |
| H                                                   | -4.492481 | -0.759908 | 0.587778  |
| H                                                   | -1.777402 | -2.620358 | 0.475494  |
| 28                                                  |           |           |           |
| Dimer 236 of the n...z type                         |           |           |           |
| C                                                   | 1.460260  | -0.374127 | -0.177774 |
| C                                                   | 1.935032  | 0.908709  | -0.881790 |
| N                                                   | 0.618306  | -0.068495 | 0.968154  |
| H                                                   | 1.176784  | 0.273572  | 1.744822  |
| H                                                   | 0.117127  | -0.897117 | 1.277231  |
| H                                                   | 0.843427  | -0.917859 | -0.901288 |
| C                                                   | 2.638918  | -1.285031 | 0.161071  |
| O                                                   | 2.933429  | -1.662291 | 1.271204  |
| O                                                   | 3.331636  | -1.629267 | -0.942933 |
| H                                                   | 4.071731  | -2.201152 | -0.683450 |
| H                                                   | 2.491294  | 0.671086  | -1.786418 |
| H                                                   | 1.058447  | 1.495284  | -1.155998 |
| S                                                   | 2.950385  | 2.039415  | 0.166272  |
| H                                                   | 4.092165  | 1.321578  | 0.134448  |
| C                                                   | -1.994218 | -1.414283 | -0.344318 |
| C                                                   | -3.168729 | -0.389462 | -0.468260 |
| O                                                   | -1.901848 | -2.000964 | 0.766919  |
| O                                                   | -1.291474 | -1.546635 | -1.361582 |
| H                                                   | -3.897386 | -0.815461 | -1.159401 |
| C                                                   | -2.734811 | 0.985774  | -0.983950 |
| N                                                   | -3.824178 | -0.299553 | 0.882425  |
| H                                                   | -4.842483 | -0.316419 | 0.854473  |
| H                                                   | -3.600604 | 1.573472  | -1.290838 |
| H                                                   | -2.096626 | 0.826637  | -1.850634 |
| S                                                   | -1.863552 | 2.027207  | 0.263699  |
| H                                                   | -3.442434 | -1.112395 | 1.405036  |
| H                                                   | -3.507432 | 0.557269  | 1.358694  |
| H                                                   | -0.804887 | 1.175656  | 0.520997  |
| 28                                                  |           |           |           |
| Dimer 237 of the n...z type                         |           |           |           |
| C                                                   | 3.213369  | 0.609593  | -0.432549 |
| C                                                   | 1.700380  | 0.622350  | -0.188408 |
| N                                                   | 3.660282  | 0.188974  | -1.762327 |
| H                                                   | 3.047426  | -0.524953 | -2.148413 |
| H                                                   | 3.688920  | 0.965546  | -2.412313 |
| H                                                   | 3.568661  | 1.633055  | -0.267824 |
| C                                                   | 3.950491  | -0.227444 | 0.630975  |
| O                                                   | 3.619117  | -0.278627 | 1.794063  |
| O                                                   | 5.015619  | -0.873875 | 0.158598  |
| H                                                   | 5.009405  | -0.685528 | -0.814976 |
| H                                                   | 1.477568  | 0.980171  | 0.814593  |
| H                                                   | 1.222863  | 1.285617  | -0.909166 |
| S                                                   | 0.890250  | -1.018666 | -0.431313 |
| H                                                   | 1.426948  | -1.623684 | 0.648704  |
| C                                                   | -3.987529 | -1.008328 | -0.249598 |
| C                                                   | -3.117201 | 0.083915  | 0.468749  |
| O                                                   | -3.770525 | -2.189166 | 0.126161  |
| O                                                   | -4.808984 | -0.582593 | -1.080684 |
| H                                                   | -3.759762 | 0.574665  | 1.201447  |

| Nov 11, 22 15:56 dimers_structures.xyz Page 210/325 |           |           |           |
|-----------------------------------------------------|-----------|-----------|-----------|
| C                                                   | -2.533965 | 1.110698  | -0.491075 |
| N                                                   | -2.047991 | -0.640076 | 1.242041  |
| H                                                   | -1.855505 | -0.226324 | 2.152846  |
| H                                                   | -3.351824 | 1.580982  | -1.030590 |
| H                                                   | -1.883490 | 0.630577  | -1.224648 |
| S                                                   | -1.491670 | 2.402615  | 0.314552  |
| H                                                   | -2.415173 | -1.606108 | 1.333883  |
| H                                                   | -1.155981 | -0.697011 | 0.720152  |
| H                                                   | -2.478453 | 2.976925  | 1.032808  |
| 28                                                  |           |           |           |
| Dimer 238 of the n...z type                         |           |           |           |
| C                                                   | 2.801166  | 0.453980  | 0.838878  |
| C                                                   | 2.058132  | -0.765350 | 1.397924  |
| N                                                   | 1.988068  | 1.599043  | 0.432044  |
| H                                                   | 1.065630  | 1.350294  | 0.068680  |
| H                                                   | 1.854062  | 2.253584  | 1.192747  |
| H                                                   | 3.488166  | 0.790608  | 1.624641  |
| C                                                   | 3.724064  | 0.061949  | -0.331808 |
| O                                                   | 4.361444  | -0.967763 | -0.375252 |
| O                                                   | 3.779629  | 0.984696  | -1.290163 |
| H                                                   | 3.130785  | 1.678258  | -0.985994 |
| H                                                   | 2.767740  | -1.505271 | 1.764498  |
| H                                                   | 1.424934  | -0.451184 | 2.227879  |
| S                                                   | 0.921713  | -1.583162 | 0.199892  |
| H                                                   | 1.873274  | -2.141108 | -0.574680 |
| C                                                   | -1.935344 | 1.846958  | -0.199004 |
| C                                                   | -2.277135 | 0.403004  | 0.295632  |
| O                                                   | -2.889262 | 2.661874  | -0.167626 |
| O                                                   | -0.767965 | 2.008581  | -0.603812 |
| H                                                   | -1.507433 | 0.042442  | 0.974183  |
| C                                                   | -2.416211 | -0.530592 | -0.906614 |
| N                                                   | -3.573539 | 0.485500  | 1.056645  |
| H                                                   | -3.420310 | 0.652805  | 2.051303  |
| H                                                   | -1.460321 | -0.560666 | -1.423938 |
| H                                                   | -3.171743 | -0.155381 | -1.599870 |
| S                                                   | -2.952830 | -2.243836 | -0.491441 |
| H                                                   | -4.060273 | 1.315350  | 0.673074  |
| H                                                   | -4.133729 | -0.367471 | 0.961601  |
| H                                                   | -1.853409 | -2.580906 | 0.214617  |
| 28                                                  |           |           |           |
| Dimer 239 of the n...z type                         |           |           |           |
| C                                                   | 2.801162  | -0.581352 | -0.378361 |
| C                                                   | 1.320945  | -0.298513 | -0.100376 |
| N                                                   | 3.506216  | -1.390707 | 0.620324  |
| H                                                   | 3.131401  | -1.223477 | 1.551165  |
| H                                                   | 3.429917  | -2.381277 | 0.422461  |
| H                                                   | 2.851520  | -1.109272 | -1.337608 |
| C                                                   | 3.593417  | 0.719157  | -0.613226 |
| O                                                   | 3.156089  | 1.675342  | -1.213668 |
| O                                                   | 4.830742  | 0.688550  | -0.117695 |
| H                                                   | 4.888375  | -0.189024 | 0.342997  |
| H                                                   | 0.895245  | 0.296240  | -0.906731 |
| H                                                   | 0.770386  | -1.236432 | -0.033468 |
| S                                                   | 0.999975  | 0.549944  | 1.504904  |
| H                                                   | 1.525875  | 1.745185  | 1.166630  |
| C                                                   | -1.857047 | -1.701600 | -0.613541 |
| C                                                   | -2.953499 | -0.617319 | -0.341974 |
| O                                                   | -1.401917 | -2.264976 | 0.414993  |
| O                                                   | -1.530882 | -1.844611 | -1.804501 |
| H                                                   | -3.796265 | -0.752800 | -1.016657 |
| C                                                   | -2.345090 | 0.776328  | -0.505282 |
| N                                                   | -3.441311 | -0.819917 | 1.067647  |
| H                                                   | -4.243941 | -1.448396 | 1.106614  |
| H                                                   | -2.015237 | 0.886259  | -1.535958 |
| H                                                   | -1.478100 | 0.893646  | 0.148721  |
| S                                                   | -3.464481 | 2.167076  | -0.050516 |
| H                                                   | -2.656327 | -1.286544 | 1.557507  |
| H                                                   | -3.706997 | 0.063055  | 1.515458  |
| H                                                   | -4.409675 | 1.930232  | -0.983612 |

| Nov 11, 22 15:56       | dimers_structures.xyz | Page 211/325 |
|------------------------|-----------------------|--------------|
| 28                     |                       |              |
| Dimer 240 of the n...z | type                  |              |
| C                      | -2.292152             | -0.333964    |
| C                      | -2.011379             | 1.169253     |
| N                      | -3.637271             | -0.775766    |
| H                      | -4.328553             | -0.062058    |
| H                      | -3.701159             | -0.986940    |
| H                      | -1.573324             | -0.851546    |
| C                      | -1.973316             | -0.860305    |
| O                      | -1.034596             | -0.477366    |
| O                      | -2.805828             | -1.810697    |
| H                      | -3.480507             | -1.882980    |
| H                      | -0.984557             | 1.387586     |
| H                      | -2.155709             | 1.482096     |
| S                      | -3.146758             | 2.230765     |
| H                      | -2.662601             | 1.887309     |
| C                      | 3.340532              | 1.345035     |
| C                      | 3.080984              | -0.192174    |
| O                      | 3.492461              | 1.737529     |
| O                      | 3.327394              | 1.997628     |
| H                      | 3.707649              | -0.604397    |
| C                      | 1.601429              | -0.426982    |
| N                      | 3.468023              | -0.843412    |
| H                      | 4.438042              | -1.158955    |
| H                      | 1.358479              | 0.068657     |
| H                      | 0.976735              | -0.004993    |
| S                      | 1.095020              | -2.196597    |
| H                      | 3.389629              | -0.087257    |
| H                      | 2.875042              | -1.647708    |
| H                      | 1.841343              | -2.533189    |
| 28                     |                       |              |
| Dimer 241 of the n...z | type                  |              |
| C                      | 3.164620              | -0.019483    |
| C                      | 1.739103              | 0.223955     |
| N                      | 4.090742              | 1.114188     |
| H                      | 3.606709              | 1.994691     |
| H                      | 4.553823              | 1.165581     |
| C                      | 3.581372              | -0.830357    |
| C                      | 3.170212              | -0.577451    |
| O                      | 2.338152              | -1.345586    |
| O                      | 4.201971              | -0.157136    |
| H                      | 4.676026              | 0.487133     |
| H                      | 1.142723              | -0.685989    |
| H                      | 1.773433              | 0.564759     |
| S                      | 0.841990              | 1.558557     |
| H                      | 0.726951              | 0.896102     |
| C                      | -1.690169             | -1.842598    |
| C                      | -2.636439             | -0.593653    |
| O                      | -0.849450             | -1.919444    |
| O                      | -1.903791             | -2.629057    |
| H                      | -3.588876             | -0.928622    |
| C                      | -2.856573             | 0.064654     |
| N                      | -2.065598             | 0.384076     |
| H                      | -1.715093             | -0.152591    |
| H                      | -3.240260             | -0.684726    |
| H                      | -1.916364             | 0.441036     |
| S                      | -3.986216             | 1.523880     |
| H                      | -1.244898             | 0.877466     |
| H                      | -2.749867             | 1.081610     |
| H                      | -5.113644             | 0.844310     |
| 28                     |                       |              |
| Dimer 242 of the n...z | type                  |              |
| C                      | -2.414700             | 0.175370     |
| C                      | -1.833617             | 1.535860     |
| N                      | -1.512993             | -0.971486    |
| H                      | -0.846430             | -1.007697    |
| H                      | -0.997617             | -1.012199    |
| H                      | -2.828571             | 0.311131     |
| C                      | -3.639383             | -0.199897    |

| Nov 11, 22 15:56       | dimers_structures.xyz | Page 212/325 |
|------------------------|-----------------------|--------------|
| O                      | -4.424845             | 0.604384     |
| O                      | -3.778162             | -1.513825    |
| H                      | -2.973702             | -1.902523    |
| H                      | -2.602593             | 2.302940     |
| H                      | -1.015792             | 1.795372     |
| S                      | -1.102745             | 1.623471     |
| H                      | -2.208929             | 1.279878     |
| C                      | 1.762086              | -1.954488    |
| C                      | 2.609507              | -0.653643    |
| O                      | 0.606542              | -1.911581    |
| O                      | 2.320541              | -2.868217    |
| H                      | 3.616238              | -0.904963    |
| C                      | 2.657609              | 0.108923     |
| N                      | 1.991617              | 0.203667     |
| H                      | 2.139552              | -0.196743    |
| H                      | 3.130555              | -0.528711    |
| H                      | 1.650594              | 0.345595     |
| S                      | 3.529236              | 1.731776     |
| H                      | 0.970341              | 0.260488     |
| H                      | 2.390851              | 1.148903     |
| H                      | 4.759652              | 1.240461     |
| 28                     |                       |              |
| Dimer 243 of the n...z | type                  |              |
| C                      | -2.525350             | -0.811411    |
| C                      | -1.649704             | -1.337643    |
| N                      | -3.968002             | -0.764928    |
| H                      | -4.154728             | -0.605752    |
| H                      | -4.428876             | -1.623596    |
| H                      | -2.353370             | -1.463963    |
| C                      | -2.067723             | 0.580986     |
| O                      | -0.903369             | 0.908317     |
| O                      | -3.067389             | 1.396911     |
| H                      | -3.885169             | 0.872020     |
| H                      | -0.601780             | -1.386170    |
| H                      | -1.972267             | -2.347089    |
| S                      | -1.807541             | -0.383534    |
| H                      | -1.242875             | 0.761705     |
| C                      | 2.560935              | -1.544225    |
| C                      | 2.152137              | -0.043382    |
| O                      | 3.782898              | -1.787103    |
| O                      | 1.631654              | -2.315696    |
| H                      | 1.269413              | 0.048480     |
| C                      | 1.880653              | 0.558958     |
| N                      | 3.295519              | 0.668984     |
| H                      | 3.185078              | 0.689469     |
| H                      | 1.099387              | -0.026653    |
| H                      | 2.770746              | 0.511814     |
| S                      | 1.399611              | 2.338945     |
| H                      | 4.130473              | 0.092516     |
| H                      | 3.400497              | 1.634325     |
| H                      | 0.361690              | 2.188793     |
| 28                     |                       |              |
| Dimer 244 of the n...z | type                  |              |
| C                      | -2.550737             | -0.413277    |
| C                      | -1.319324             | 0.471678     |
| N                      | -2.342501             | -1.457129    |
| H                      | -1.354408             | -1.692667    |
| H                      | -2.822961             | -2.311146    |
| H                      | -2.804023             | -0.825064    |
| C                      | -3.752323             | 0.458916     |
| O                      | -4.239837             | 1.308632     |
| O                      | -4.202740             | 0.197550     |
| H                      | -3.602277             | -0.526639    |
| H                      | -1.560270             | 1.241370     |
| H                      | -0.497281             | -0.134757    |
| S                      | -0.787314             | 1.337479     |
| H                      | -0.372480             | 2.476506     |
| C                      | 1.347490              | -1.749245    |
| C                      | 2.489675              | -0.783914    |

| Nov 11, 22 15:56            |           |           |           | dimers_structures.xyz | Page 213/325 |
|-----------------------------|-----------|-----------|-----------|-----------------------|--------------|
| O                           | 0.520246  | -2.056106 | -0.707274 |                       |              |
| O                           | 1.382306  | -2.108540 | 1.379835  |                       |              |
| H                           | 3.379650  | -1.383821 | -0.467449 |                       |              |
| C                           | 2.802805  | 0.298539  | 0.759765  |                       |              |
| N                           | 2.083445  | -0.166813 | -1.576845 |                       |              |
| H                           | 1.825842  | -0.903493 | -2.236445 |                       |              |
| H                           | 3.064656  | -0.183643 | 1.697568  |                       |              |
| H                           | 1.928569  | 0.927047  | 0.937690  |                       |              |
| S                           | 4.139361  | 1.465773  | 0.255426  |                       |              |
| H                           | 1.233120  | 0.408600  | -1.434814 |                       |              |
| H                           | 2.825509  | 0.419454  | -1.966998 |                       |              |
| H                           | 5.151666  | 0.575344  | 0.295579  |                       |              |
| 28                          |           |           |           |                       |              |
| Dimer 245 of the n...z type |           |           |           |                       |              |
| C                           | -3.141368 | -0.527163 | 0.766163  |                       |              |
| C                           | -3.942454 | 0.773437  | 0.527281  |                       |              |
| N                           | -1.938249 | -0.404511 | 1.569875  |                       |              |
| H                           | -1.297395 | 0.306690  | 1.217668  |                       |              |
| H                           | -2.180057 | -0.155030 | 2.522713  |                       |              |
| H                           | -3.825103 | -1.202086 | 1.294244  |                       |              |
| C                           | -2.905221 | -1.226143 | -0.582062 |                       |              |
| O                           | -3.851279 | -1.479834 | -1.306673 |                       |              |
| O                           | -1.677469 | -1.548489 | -0.956769 |                       |              |
| H                           | -0.910277 | -1.279819 | -0.367215 |                       |              |
| H                           | -4.889675 | 0.554674  | 0.036113  |                       |              |
| H                           | -4.150252 | 1.239327  | 1.491371  |                       |              |
| S                           | -3.052657 | 2.063441  | -0.444901 |                       |              |
| H                           | -3.147658 | 1.455956  | -1.645411 |                       |              |
| C                           | 1.231562  | -0.055135 | 0.461190  |                       |              |
| C                           | 2.780564  | -0.109229 | 0.599955  |                       |              |
| O                           | 0.709080  | -1.098434 | -0.026085 |                       |              |
| O                           | 0.686743  | 1.004707  | 0.800805  |                       |              |
| H                           | 3.085733  | 0.291065  | 1.564713  |                       |              |
| C                           | 3.422286  | 0.683565  | -0.541330 |                       |              |
| N                           | 3.203049  | -1.552789 | 0.542490  |                       |              |
| H                           | 3.152263  | -1.998061 | 1.459909  |                       |              |
| H                           | 3.097612  | 1.718890  | -0.461895 |                       |              |
| H                           | 3.094813  | 0.297285  | -1.508788 |                       |              |
| S                           | 5.261239  | 0.603161  | -0.590843 |                       |              |
| H                           | 2.526973  | -2.034924 | -0.068869 |                       |              |
| H                           | 4.162326  | -1.652020 | 0.192159  |                       |              |
| H                           | 5.480975  | 1.233919  | 0.581230  |                       |              |
| 28                          |           |           |           |                       |              |
| Dimer 246 of the n...z type |           |           |           |                       |              |
| C                           | 3.282601  | 0.501967  | 0.473944  |                       |              |
| C                           | 3.328614  | -0.956256 | -0.022627 |                       |              |
| N                           | 3.033288  | 0.565139  | 1.902340  |                       |              |
| H                           | 2.113787  | 0.185883  | 2.112199  |                       |              |
| H                           | 3.032180  | 1.528613  | 2.221257  |                       |              |
| H                           | 4.273109  | 0.925351  | 0.271684  |                       |              |
| C                           | 2.299370  | 1.319695  | -0.367021 |                       |              |
| O                           | 1.318095  | 1.882392  | 0.074672  |                       |              |
| O                           | 2.641489  | 1.342893  | -1.660899 |                       |              |
| H                           | 1.998742  | 1.871607  | -2.161032 |                       |              |
| H                           | 3.608595  | -0.997870 | -1.073191 |                       |              |
| H                           | 4.079792  | -1.488007 | 0.560491  |                       |              |
| S                           | 1.766648  | -1.908780 | 0.220568  |                       |              |
| H                           | 1.084609  | -1.433609 | -0.843512 |                       |              |
| C                           | -1.677588 | -1.217619 | -0.485772 |                       |              |
| C                           | -1.544491 | 0.146906  | 0.270070  |                       |              |
| O                           | -1.239614 | -1.206114 | -1.668037 |                       |              |
| O                           | -2.154992 | -2.161676 | 0.165706  |                       |              |
| H                           | -0.634498 | 0.078665  | 0.870808  |                       |              |
| C                           | -2.714327 | 0.488835  | 1.181870  |                       |              |
| N                           | -1.292684 | 1.202894  | -0.768765 |                       |              |
| H                           | -0.512234 | 1.820928  | -0.517660 |                       |              |
| H                           | -2.528501 | 1.415131  | 1.727569  |                       |              |
| H                           | -2.835746 | -0.319601 | 1.898824  |                       |              |
| S                           | -4.305630 | 0.757627  | 0.290025  |                       |              |

| Nov 11, 22 15:56            |           |           |           | dimers_structures.xyz | Page 214/325 |
|-----------------------------|-----------|-----------|-----------|-----------------------|--------------|
| H                           | -1.044474 | 0.653120  | -1.616039 |                       |              |
| H                           | -2.139354 | 1.741871  | -0.968534 |                       |              |
| H                           | -4.421423 | -0.500986 | -0.181690 |                       |              |
| 28                          |           |           |           |                       |              |
| Dimer 247 of the n...z type |           |           |           |                       |              |
| C                           | -2.596564 | 0.243201  | 0.816377  |                       |              |
| C                           | -2.855895 | 1.175015  | -0.372884 |                       |              |
| N                           | -1.440333 | 0.575252  | 1.655627  |                       |              |
| H                           | -0.725900 | 1.106520  | 1.155769  |                       |              |
| H                           | -1.713130 | 1.115634  | 2.467749  |                       |              |
| H                           | -3.495333 | 0.265599  | 1.443417  |                       |              |
| C                           | -2.481138 | -1.225663 | 0.362129  |                       |              |
| O                           | -3.183098 | -1.726297 | -0.488527 |                       |              |
| O                           | -1.545836 | -1.909939 | 1.019021  |                       |              |
| H                           | -1.132055 | -1.226666 | 1.613210  |                       |              |
| H                           | -3.782097 | 0.899323  | -0.874050 |                       |              |
| H                           | -2.949154 | 2.199619  | -0.012750 |                       |              |
| S                           | -1.496675 | 1.211436  | -1.619921 |                       |              |
| H                           | -1.767822 | 0.012710  | -2.174775 |                       |              |
| C                           | 2.007157  | 1.730680  | 0.202055  |                       |              |
| C                           | 2.544325  | 0.261260  | 0.256247  |                       |              |
| O                           | 1.133735  | 2.008677  | 1.065797  |                       |              |
| O                           | 2.473416  | 2.436024  | -0.707294 |                       |              |
| H                           | 3.626703  | 0.247799  | 0.146750  |                       |              |
| C                           | 1.879036  | -0.563390 | -0.847517 |                       |              |
| N                           | 2.209728  | -0.301752 | 1.612205  |                       |              |
| H                           | 2.939018  | -0.097943 | 2.296349  |                       |              |
| H                           | 2.191802  | -0.160373 | -1.808398 |                       |              |
| H                           | 0.792907  | -0.480581 | -0.789744 |                       |              |
| S                           | 2.224207  | -2.371290 | -0.782540 |                       |              |
| H                           | 1.351856  | 0.182515  | 1.922866  |                       |              |
| H                           | 2.077404  | -1.319085 | 1.576870  |                       |              |
| H                           | 3.552249  | -2.296238 | -1.009137 |                       |              |
| 28                          |           |           |           |                       |              |
| Dimer 248 of the n...z type |           |           |           |                       |              |
| C                           | -2.099400 | -0.047470 | 0.597019  |                       |              |
| C                           | -3.575825 | -0.127253 | 1.004002  |                       |              |
| N                           | -1.478774 | 1.279136  | 0.647347  |                       |              |
| H                           | -2.152370 | 2.004463  | 0.411448  |                       |              |
| H                           | -1.108075 | 1.484316  | 1.567825  |                       |              |
| H                           | -1.539509 | -0.706918 | 1.269978  |                       |              |
| C                           | -1.866805 | -0.655266 | -0.798051 |                       |              |
| O                           | -2.419975 | -1.654173 | -1.197274 |                       |              |
| O                           | -0.956544 | -0.003827 | -1.526655 |                       |              |
| H                           | -0.712843 | 0.783682  | -0.976438 |                       |              |
| H                           | -3.928732 | -1.154992 | 0.938215  |                       |              |
| H                           | -3.685183 | 0.212862  | 2.033871  |                       |              |
| S                           | -4.691456 | 0.958398  | 0.015630  |                       |              |
| H                           | -4.618204 | 0.256449  | -1.133783 |                       |              |
| C                           | 3.480268  | 1.404993  | -0.159210 |                       |              |
| C                           | 2.920352  | -0.044018 | -0.366975 |                       |              |
| O                           | 4.637552  | 1.460483  | 0.329320  |                       |              |
| O                           | 2.701438  | 2.323536  | -0.467999 |                       |              |
| H                           | 2.500915  | -0.144624 | -1.366111 |                       |              |
| C                           | 1.864225  | -0.341693 | 0.694406  |                       |              |
| N                           | 4.083864  | -0.992151 | -0.242803 |                       |              |
| H                           | 4.499332  | -1.209672 | -1.148819 |                       |              |
| H                           | 1.064357  | 0.388120  | 0.591092  |                       |              |
| H                           | 2.283674  | -0.239188 | 1.697426  |                       |              |
| S                           | 1.179136  | -2.051845 | 0.638612  |                       |              |
| H                           | 4.788795  | -0.465544 | 0.308020  |                       |              |
| H                           | 3.824637  | -1.875969 | 0.205387  |                       |              |
| H                           | 0.708023  | -1.990641 | -0.624083 |                       |              |
| 28                          |           |           |           |                       |              |
| Dimer 249 of the n...z type |           |           |           |                       |              |
| C                           | -1.699584 | 0.184812  | -0.305784 |                       |              |
| C                           | -2.913578 | 1.073438  | -0.592480 |                       |              |
| N                           | -1.448376 | -0.902814 | -1.257325 |                       |              |
| H                           | -2.320880 | -1.271880 | -1.628306 |                       |              |

| Nov 11, 22 15:56            | dimers_structures.xyz |           | Page 215/325 |
|-----------------------------|-----------------------|-----------|--------------|
| H                           | -0.880282             | -0.595117 | -2.037473    |
| H                           | -0.814952             | 0.836435  | -0.285938    |
| C                           | -1.744236             | -0.400936 | 1.113407     |
| O                           | -2.161175             | 0.194285  | 2.081612     |
| O                           | -1.222875             | -1.628823 | 1.199734     |
| H                           | -1.030911             | -1.877025 | 0.257717     |
| H                           | -2.997417             | 1.852539  | 0.163376     |
| H                           | -2.792600             | 1.547351  | -1.566851    |
| S                           | -4.516675             | 0.164003  | -0.695942    |
| H                           | -4.610662             | -0.137575 | 0.615225     |
| C                           | 2.118593              | 1.818277  | 0.168257     |
| C                           | 2.454910              | 0.435296  | -0.484217    |
| O                           | 3.114105              | 2.514196  | 0.484708     |
| O                           | 0.904592              | 2.045954  | 0.328638     |
| H                           | 1.838792              | 0.275646  | -1.366245    |
| C                           | 2.242476              | -0.681603 | 0.535864     |
| N                           | 3.894112              | 0.484034  | -0.923112    |
| H                           | 3.987055              | 0.822886  | -1.881060    |
| H                           | 1.208528              | -0.654678 | 0.871266     |
| H                           | 2.881799              | -0.531658 | 1.408219     |
| S                           | 2.651976              | -2.368071 | -0.080722    |
| H                           | 4.341190              | 1.182232  | -0.302219    |
| H                           | 4.351950              | -0.430697 | -0.865749    |
| H                           | 1.724777              | -2.402513 | -1.060091    |
| 28                          |                       |           |              |
| Dimer 250 of the n...z type |                       |           |              |
| C                           | -2.864851             | 0.737489  | 0.127441     |
| C                           | -3.280875             | -0.730846 | -0.016894    |
| N                           | -2.496141             | 1.433526  | -1.109013    |
| H                           | -2.068943             | 0.795264  | -1.775366    |
| H                           | -3.300162             | 1.860157  | -1.553799    |
| H                           | -3.713238             | 1.270619  | 0.571977     |
| C                           | -1.727020             | 0.907527  | 1.151340     |
| O                           | -1.626253             | 0.256941  | 2.166339     |
| O                           | -0.862287             | 1.872069  | 0.830736     |
| H                           | -1.162521             | 2.186366  | -0.061770    |
| H                           | -3.568206             | -1.139567 | 0.950226     |
| H                           | -4.136315             | -0.797094 | -0.689080    |
| S                           | -1.989451             | -1.821820 | -0.755274    |
| H                           | -1.186074             | -1.912378 | 0.324520     |
| C                           | 2.260426              | -1.754685 | 0.341580     |
| C                           | 2.377219              | -0.428907 | -0.480598    |
| O                           | 1.157904              | -2.348824 | 0.254981     |
| O                           | 3.267131              | -2.041867 | 1.016048     |
| H                           | 3.326955              | -0.400493 | -1.011838    |
| C                           | 2.254094              | 0.768660  | 0.462396     |
| N                           | 1.282055              | -0.399536 | -1.513125    |
| H                           | 1.542908              | -0.922553 | -2.349636    |
| H                           | 3.077834              | 0.729262  | 1.171574     |
| H                           | 1.316181              | 0.731988  | 1.016917     |
| S                           | 2.225887              | 2.409685  | -0.375607    |
| H                           | 0.447040              | -0.862473 | -1.120252    |
| H                           | 1.061159              | 0.563107  | -1.793464    |
| H                           | 3.473081              | 2.352050  | -0.887367    |
| 28                          |                       |           |              |
| Dimer 251 of the n...z type |                       |           |              |
| C                           | 1.956274              | -0.737392 | 0.251716     |
| C                           | 3.437091              | -0.626150 | 0.653788     |
| N                           | 1.791869              | -1.323154 | -1.064812    |
| H                           | 2.164175              | -0.692667 | -1.769610    |
| H                           | 0.796001              | -1.441774 | -1.259588    |
| H                           | 1.475553              | -1.395544 | 0.981303     |
| C                           | 1.258482              | 0.614351  | 0.416168     |
| O                           | 0.784996              | 1.270862  | -0.484929    |
| O                           | 1.235345              | 1.016547  | 1.701286     |
| H                           | 0.791657              | 1.878417  | 1.751157     |
| H                           | 3.536117              | -0.276838 | 1.680135     |
| H                           | 3.889259              | -1.614721 | 0.575508     |
| S                           | 4.467076              | 0.447232  | -0.441335    |

| Nov 11, 22 15:56            | dimers_structures.xyz |           | Page 216/325 |
|-----------------------------|-----------------------|-----------|--------------|
| H                           | 3.975287              | 1.634076  | -0.029922    |
| C                           | -1.657661             | -1.357065 | -0.180488    |
| C                           | -3.127626             | -0.845454 | -0.017807    |
| O                           | -1.043212             | -1.573774 | 0.894672     |
| O                           | -1.267654             | -1.515031 | -1.352527    |
| H                           | -3.787780             | -1.678663 | -0.264952    |
| C                           | -3.476778             | 0.346056  | -0.906250    |
| N                           | -3.320814             | -0.539533 | 1.442178     |
| H                           | -4.218008             | -0.843899 | 1.817440     |
| H                           | -4.545800             | 0.559270  | -0.870864    |
| H                           | -3.203133             | 0.094219  | -1.928283    |
| S                           | -2.658951             | 1.920932  | -0.408925    |
| H                           | -2.527214             | -1.025913 | 1.906249     |
| H                           | -3.207588             | 0.468491  | 1.607720     |
| H                           | -1.380404             | 1.528822  | -0.604491    |
| 28                          |                       |           |              |
| Dimer 252 of the n...z type |                       |           |              |
| C                           | -2.874304             | -1.276319 | 0.281708     |
| C                           | -3.684394             | -0.445963 | -0.723476    |
| N                           | -3.065213             | -0.950764 | 1.697407     |
| H                           | -3.303394             | 0.031093  | 1.816212     |
| H                           | -3.797140             | -1.509885 | 2.118686     |
| H                           | -3.151555             | -2.325362 | 0.130965     |
| C                           | -1.369337             | -1.221656 | -0.041342    |
| O                           | -0.918669             | -1.261389 | -1.163580    |
| O                           | -0.591615             | -1.138673 | 1.040793     |
| H                           | -1.234573             | -1.102196 | 1.799058     |
| H                           | -3.450056             | -0.757196 | -1.740005    |
| H                           | -4.748487             | -0.603638 | -0.546977    |
| S                           | -3.439109             | 1.375846  | -0.574872    |
| H                           | -2.157056             | 1.411186  | -0.996495    |
| C                           | 3.527548              | -0.923125 | -0.353074    |
| C                           | 2.545870              | 0.053750  | 0.377525     |
| O                           | 4.719621              | -0.524544 | -0.417921    |
| O                           | 3.012412              | -1.956337 | -0.814981    |
| H                           | 1.911014              | -0.488676 | 1.074503     |
| C                           | 1.686090              | 0.782516  | -0.653901    |
| N                           | 3.392594              | 1.027051  | 1.155039     |
| H                           | 3.551910              | 0.713561  | 2.112578     |
| H                           | 1.066586              | 0.045390  | -1.159717    |
| H                           | 2.309728              | 1.288330  | -1.393726    |
| S                           | 0.610509              | 2.105512  | 0.049228     |
| H                           | 4.307374              | 1.026160  | 0.665864     |
| H                           | 2.973729              | 1.961776  | 1.191699     |
| H                           | -0.074969             | 1.306047  | 0.891402     |
| 28                          |                       |           |              |
| Dimer 253 of the n...z type |                       |           |              |
| C                           | -2.961979             | 0.449065  | -0.493238    |
| C                           | -3.172515             | -1.021420 | -0.877308    |
| N                           | -2.026668             | 1.204783  | -1.330816    |
| H                           | -1.310086             | 0.610999  | -1.738154    |
| H                           | -2.500494             | 1.684179  | -2.086722    |
| H                           | -3.939866             | 0.939017  | -0.548434    |
| C                           | -2.532093             | 0.573563  | 0.981084     |
| O                           | -3.032264             | -0.057082 | 1.882741     |
| O                           | -1.537841             | 1.446078  | 1.180374     |
| H                           | -1.345259             | 1.822820  | 0.280127     |
| H                           | -3.988927             | -1.454450 | -0.303097    |
| H                           | -3.421755             | -1.083089 | -1.936097    |
| S                           | -1.688486             | -2.105827 | -0.642637    |
| H                           | -1.920439             | -2.399176 | 0.652876     |
| C                           | 3.199561              | -1.272692 | 0.054864     |
| C                           | 2.098729              | -0.184448 | -0.197953    |
| O                           | 3.086255              | -1.902076 | 1.137764     |
| O                           | 4.070236              | -1.364574 | -0.828702    |
| H                           | 1.686814              | -0.302869 | -1.198938    |
| C                           | 2.698040              | 1.208983  | -0.026701    |
| N                           | 0.997963              | -0.432643 | 0.793951     |
| H                           | 0.247000              | -1.001289 | 0.378438     |

| Nov 11, 22 15:56 dimers_structures.xyz Page 217/325 |           |           |           |
|-----------------------------------------------------|-----------|-----------|-----------|
| H                                                   | 3.531568  | 1.309432  | -0.718407 |
| H                                                   | 3.079788  | 1.342286  | 0.987877  |
| S                                                   | 1.511732  | 2.597400  | -0.280036 |
| H                                                   | 1.444302  | -0.988719 | 1.547286  |
| H                                                   | 0.564239  | 0.422755  | 1.154421  |
| H                                                   | 1.232582  | 2.330893  | -1.572239 |
| 28                                                  |           |           |           |
| Dimer 254 of the n...z type                         |           |           |           |
| C                                                   | 2.856779  | 0.020552  | -0.949028 |
| C                                                   | 1.753920  | 1.068272  | -0.736385 |
| N                                                   | 2.383011  | -1.363250 | -0.811874 |
| H                                                   | 1.359982  | -1.420042 | -0.812673 |
| H                                                   | 2.726040  | -1.938797 | -1.572916 |
| H                                                   | 3.281185  | 0.209544  | -1.941128 |
| C                                                   | 4.000375  | 0.253561  | 0.057390  |
| O                                                   | 4.654257  | 1.273732  | 0.109103  |
| O                                                   | 4.187174  | -0.770834 | 0.884157  |
| H                                                   | 3.494420  | -1.430340 | 0.581750  |
| H                                                   | 2.146427  | 2.063576  | -0.935835 |
| H                                                   | 0.934111  | 0.864937  | -1.424264 |
| S                                                   | 0.980974  | 1.067105  | 0.940635  |
| H                                                   | 1.962416  | 1.744327  | 1.571143  |
| C                                                   | -1.378871 | -1.466165 | -0.164835 |
| C                                                   | -2.756810 | -0.747939 | -0.338398 |
| O                                                   | -1.252217 | -2.148943 | 0.877689  |
| O                                                   | -0.551967 | -1.241880 | -1.072852 |
| H                                                   | -3.158637 | -0.944429 | -1.330490 |
| C                                                   | -2.591338 | 0.754920  | -0.113242 |
| N                                                   | -3.698427 | -1.339085 | 0.676297  |
| H                                                   | -4.229253 | -2.121058 | 0.292477  |
| H                                                   | -1.900888 | 1.137041  | -0.861443 |
| H                                                   | -2.163227 | 0.954115  | 0.870816  |
| S                                                   | -4.162430 | 1.715950  | -0.155008 |
| H                                                   | -3.089081 | -1.716011 | 1.424302  |
| H                                                   | -4.366605 | -0.649220 | 1.033790  |
| H                                                   | -4.487983 | 1.437997  | -1.434290 |
| 28                                                  |           |           |           |
| Dimer 255 of the n...z type                         |           |           |           |
| C                                                   | 2.785252  | -0.194407 | 1.037099  |
| C                                                   | 2.104713  | -1.454121 | 0.486701  |
| N                                                   | 1.973103  | 1.022474  | 1.090166  |
| H                                                   | 1.317604  | 1.075258  | 0.312704  |
| H                                                   | 1.442948  | 1.085505  | 1.951051  |
| H                                                   | 3.108965  | -0.426819 | 2.058407  |
| C                                                   | 4.092656  | 0.116175  | 0.282611  |
| O                                                   | 4.856900  | -0.732259 | -0.119987 |
| O                                                   | 4.327507  | 1.420214  | 0.137446  |
| H                                                   | 3.524032  | 1.857783  | 0.523730  |
| H                                                   | 2.789935  | -2.299184 | 0.525769  |
| H                                                   | 1.230895  | -1.687287 | 1.095755  |
| S                                                   | 1.462237  | -1.282607 | -1.232932 |
| H                                                   | 2.660933  | -1.214368 | -1.846858 |
| C                                                   | -3.695961 | -1.168029 | 0.297159  |
| C                                                   | -3.212260 | 0.145059  | -0.408789 |
| O                                                   | -4.487350 | -0.990558 | 1.258042  |
| O                                                   | -3.211097 | -2.221732 | -0.150424 |
| H                                                   | -3.279199 | 0.041879  | -1.489715 |
| C                                                   | -1.777602 | 0.449796  | 0.017996  |
| N                                                   | -4.141987 | 1.248756  | 0.020443  |
| H                                                   | -4.922076 | 1.363153  | -0.627167 |
| H                                                   | -1.144152 | -0.369527 | -0.313208 |
| H                                                   | -1.704226 | 0.519668  | 1.105202  |
| S                                                   | -1.100569 | 2.044244  | -0.608293 |
| H                                                   | -4.531714 | 0.926916  | 0.926403  |
| H                                                   | -3.665242 | 2.151796  | 0.103033  |
| H                                                   | -1.101679 | 1.718268  | -1.917048 |
| 28                                                  |           |           |           |
| Dimer 256 of the n...z type                         |           |           |           |
| C                                                   | -2.966565 | 0.534590  | -0.283596 |

| Nov 11, 22 15:56 dimers_structures.xyz Page 218/325 |           |           |           |
|-----------------------------------------------------|-----------|-----------|-----------|
| C                                                   | -1.874929 | 1.403315  | 0.356816  |
| N                                                   | -3.977457 | -0.013894 | 0.624323  |
| H                                                   | -3.596204 | -0.134010 | 1.559827  |
| H                                                   | -4.793205 | 0.583149  | 0.686814  |
| H                                                   | -3.474216 | 1.157744  | -1.028140 |
| C                                                   | -2.352588 | -0.614503 | -1.107134 |
| O                                                   | -1.390570 | -0.478993 | -1.830536 |
| O                                                   | -3.001198 | -1.770516 | -0.982836 |
| H                                                   | -3.721037 | -1.575738 | -0.325882 |
| H                                                   | -1.148785 | 1.696025  | -0.400211 |
| H                                                   | -2.325771 | 2.308251  | 0.764591  |
| S                                                   | -1.011196 | 0.625849  | 1.787672  |
| H                                                   | -0.436899 | -0.430389 | 1.146587  |
| C                                                   | 1.982197  | -1.710106 | 0.316140  |
| C                                                   | 2.324670  | -0.185985 | 0.366875  |
| O                                                   | 2.923368  | -2.464248 | -0.025828 |
| O                                                   | 0.797902  | -1.991400 | 0.592441  |
| H                                                   | 1.952478  | 0.246026  | 1.293138  |
| C                                                   | 1.719394  | 0.524395  | -0.839817 |
| N                                                   | 3.825204  | -0.054596 | 0.361577  |
| H                                                   | 4.209784  | -0.061043 | 1.306833  |
| H                                                   | 0.667182  | 0.261590  | -0.917144 |
| H                                                   | 2.204149  | 0.198065  | -1.762644 |
| S                                                   | 1.908320  | 2.356614  | -0.802412 |
| H                                                   | 4.173310  | -0.903272 | -0.117147 |
| H                                                   | 4.145464  | 0.800169  | -0.101407 |
| H                                                   | 1.226453  | 2.544484  | 0.347684  |
| 28                                                  |           |           |           |
| Dimer 257 of the n...z type                         |           |           |           |
| C                                                   | 2.101884  | -0.870171 | 0.519284  |
| C                                                   | 1.873370  | 0.565566  | 1.007589  |
| N                                                   | 3.428489  | -1.438896 | 0.777576  |
| H                                                   | 4.143382  | -0.715450 | 0.754104  |
| H                                                   | 3.471977  | -1.897181 | 1.679960  |
| H                                                   | 1.361156  | -1.504980 | 1.019442  |
| C                                                   | 1.785223  | -1.017994 | -0.981193 |
| O                                                   | 0.857764  | -0.464820 | -1.530281 |
| O                                                   | 2.609445  | -1.842788 | -1.624656 |
| H                                                   | 3.272270  | -2.112707 | -0.936010 |
| H                                                   | 0.853949  | 0.892915  | 0.811839  |
| H                                                   | 2.046684  | 0.606938  | 2.083348  |
| S                                                   | 3.036783  | 1.799787  | 0.283151  |
| C                                                   | 2.501476  | 1.809189  | -0.954630 |
| H                                                   | -1.829058 | 1.809432  | 0.019026  |
| C                                                   | -2.728222 | 0.556108  | 0.295225  |
| O                                                   | -1.857069 | 2.235881  | -1.162518 |
| O                                                   | -1.163905 | 2.208328  | 0.992181  |
| H                                                   | -3.349917 | 0.722603  | 1.172893  |
| C                                                   | -1.840956 | -0.674096 | 0.484791  |
| N                                                   | -3.632887 | 0.386853  | -0.896097 |
| H                                                   | -4.531306 | 0.849943  | -0.760051 |
| H                                                   | -1.234292 | -0.515838 | 1.373745  |
| H                                                   | -1.169110 | -0.796063 | -0.366625 |
| S                                                   | -2.743195 | -2.272963 | 0.623653  |
| H                                                   | -3.144973 | 0.875300  | -1.670028 |
| H                                                   | -3.813779 | -0.599041 | -1.109949 |
| H                                                   | -3.417463 | -1.986381 | 1.756602  |
| 28                                                  |           |           |           |
| Dimer 258 of the n...z type                         |           |           |           |
| C                                                   | -1.982788 | -0.559247 | 0.805100  |
| C                                                   | -3.506033 | -0.351381 | 0.696956  |
| N                                                   | -1.324515 | 0.567453  | 1.438639  |
| H                                                   | -1.391377 | 1.390736  | 0.847107  |
| H                                                   | -0.338950 | 0.336571  | 1.546015  |
| H                                                   | -1.837666 | -1.441546 | 1.434699  |
| C                                                   | -1.418747 | -0.919030 | -0.570535 |
| O                                                   | -0.804126 | -0.167814 | -1.295296 |
| O                                                   | -1.726754 | -2.180625 | -0.921021 |
| H                                                   | -1.378356 | -2.352921 | -1.810710 |

| Nov 11, 22 15:56            |           | dimers_structures.xyz |           | Page 219/325 |  |
|-----------------------------|-----------|-----------------------|-----------|--------------|--|
| H                           | -3.987395 | -1.237201             | 0.284807  |              |  |
| H                           | -3.897542 | -0.176560             | 1.699162  |              |  |
| S                           | -4.034817 | 1.126942              | -0.272028 |              |  |
| H                           | -3.700915 | 0.663978              | -1.493996 |              |  |
| C                           | 2.045091  | -1.180180             | 0.478827  |              |  |
| C                           | 3.140579  | -0.066815             | 0.601970  |              |  |
| O                           | 2.256305  | -2.037214             | -0.414265 |              |  |
| O                           | 1.112057  | -1.112705             | 1.301350  |              |  |
| H                           | 3.765784  | -0.332292             | 1.456920  |              |  |
| C                           | 2.600720  | 1.345872              | 0.805072  |              |  |
| N                           | 4.002558  | -0.169103             | -0.626388 |              |  |
| H                           | 4.996493  | -0.024578             | -0.453147 |              |  |
| H                           | 3.409511  | 2.042807              | 1.028506  |              |  |
| H                           | 1.919318  | 1.329276              | 1.652552  |              |  |
| S                           | 1.753402  | 2.050363              | -0.671541 |              |  |
| H                           | 3.814324  | -1.123813             | -0.989750 |              |  |
| H                           | 3.681774  | 0.504060              | -1.333606 |              |  |
| H                           | 0.728554  | 1.167694              | -0.727688 |              |  |
| 28                          |           |                       |           |              |  |
| Dimer 259 of the n...z type |           |                       |           |              |  |
| C                           | -1.843643 | -0.594305             | -0.389188 |              |  |
| C                           | -1.812693 | 0.839203              | -0.931855 |              |  |
| N                           | -3.003846 | -1.407320             | -0.764011 |              |  |
| H                           | -3.835645 | -0.831836             | -0.872504 |              |  |
| H                           | -2.847256 | -1.906644             | -1.631382 |              |  |
| H                           | -0.940419 | -1.100820             | -0.751514 |              |  |
| C                           | -1.689905 | -0.619294             | 1.139352  |              |  |
| O                           | -0.955300 | 0.124073              | 1.754032  |              |  |
| O                           | -2.409725 | -1.567755             | 1.737313  |              |  |
| H                           | -2.925374 | -1.983918             | 0.997790  |              |  |
| H                           | -0.915645 | 1.353261              | -0.591233 |              |  |
| H                           | -1.806059 | 0.813932              | -2.021742 |              |  |
| S                           | -3.283719 | 1.857276              | -0.480250 |              |  |
| H                           | -2.993490 | 1.979182              | 0.831306  |              |  |
| C                           | 2.023000  | -1.772156             | -0.304872 |              |  |
| C                           | 2.696330  | -0.364179             | -0.435772 |              |  |
| O                           | 1.060602  | -1.973137             | -1.093192 |              |  |
| O                           | 2.487025  | -2.509178             | 0.580314  |              |  |
| H                           | 3.779165  | -0.463921             | -0.475396 |              |  |
| C                           | 2.278090  | 0.512364              | 0.747055  |              |  |
| N                           | 2.232091  | 0.226860              | -1.740695 |              |  |
| H                           | 2.892475  | 0.047938              | -2.497166 |              |  |
| H                           | 2.685559  | 0.070439              | 1.653844  |              |  |
| H                           | 1.191732  | 0.543657              | 0.850541  |              |  |
| S                           | 2.794977  | 2.275544              | 0.622974  |              |  |
| H                           | 1.355897  | -0.283564             | -1.960692 |              |  |
| H                           | 2.086696  | 1.239710              | -1.679870 |              |  |
| H                           | 4.126626  | 2.058867              | 0.621324  |              |  |
| 28                          |           |                       |           |              |  |
| Dimer 260 of the n...z type |           |                       |           |              |  |
| C                           | 3.178042  | 0.418412              | 0.665843  |              |  |
| C                           | 1.906177  | -0.420712             | 0.837035  |              |  |
| N                           | 3.058712  | 1.616141              | -0.170159 |              |  |
| H                           | 2.398805  | 1.462630              | -0.929095 |              |  |
| H                           | 2.741825  | 2.416314              | 0.364184  |              |  |
| H                           | 3.490135  | 0.737651              | 1.667051  |              |  |
| C                           | 4.353406  | -0.432968             | 0.148692  |              |  |
| O                           | 4.552433  | -1.579618             | 0.481818  |              |  |
| O                           | 5.162456  | 0.222169              | -0.684342 |              |  |
| H                           | 4.732424  | 1.108775              | -0.799837 |              |  |
| H                           | 2.097606  | -1.273754             | 1.485435  |              |  |
| H                           | 1.129318  | 0.196896              | 1.287847  |              |  |
| S                           | 1.181684  | -1.021513             | -0.748720 |              |  |
| H                           | 2.116455  | -1.957529             | -1.010074 |              |  |
| C                           | -4.031369 | -1.167540             | 0.043139  |              |  |
| C                           | -3.210126 | 0.078311              | -0.436275 |              |  |
| O                           | -5.165773 | -0.902680             | 0.516681  |              |  |
| O                           | -3.450772 | -2.261391             | -0.066357 |              |  |
| H                           | -2.784926 | -0.103726             | -1.421297 |              |  |

Nov 11, 22 15:56

dimers\_structures.xyz

Page 220/325

|                             |           |           |           |
|-----------------------------|-----------|-----------|-----------|
| C                           | -2.107830 | 0.384111  | 0.576532  |
| N                           | -4.172079 | 1.231578  | -0.542068 |
| H                           | -4.561455 | 1.318369  | -1.480882 |
| H                           | -1.436047 | -0.470946 | 0.611214  |
| H                           | -2.528345 | 0.529391  | 1.573614  |
| S                           | -1.154374 | 1.924833  | 0.236754  |
| H                           | -4.949637 | 0.985137  | 0.098754  |
| H                           | -3.735710 | 2.125525  | -0.295655 |
| H                           | -0.670396 | 1.552600  | -0.966406 |
| 28                          |           |           |           |
| Dimer 261 of the n...z type |           |           |           |
| C                           | -3.101773 | 0.272863  | -0.818881 |
| C                           | -1.649494 | 0.114964  | -0.354155 |
| N                           | -3.787504 | 1.497725  | -0.398003 |
| H                           | -3.456950 | 1.804436  | 0.513966  |
| H                           | -3.644778 | 2.253608  | -1.057086 |
| H                           | -3.093041 | 0.250798  | -1.914655 |
| C                           | -3.959663 | -0.942231 | -0.416064 |
| O                           | -3.558073 | -2.084204 | -0.431825 |
| O                           | -5.208732 | -0.625592 | -0.074720 |
| H                           | -5.231635 | 0.365620  | -0.118275 |
| H                           | -1.229812 | -0.814573 | -0.735158 |
| H                           | -1.056475 | 0.947935  | -0.731324 |
| S                           | -1.430485 | 0.167224  | 1.476060  |
| H                           | -1.985196 | -1.034603 | 1.734154  |
| C                           | 3.606405  | -1.495437 | 0.013165  |
| C                           | 3.352246  | 0.020753  | 0.316769  |
| O                           | 4.406615  | -1.718293 | -0.931032 |
| O                           | 2.959804  | -2.294122 | 0.713010  |
| H                           | 3.407620  | 0.209328  | 1.386934  |
| C                           | 1.985306  | 0.425451  | -0.231768 |
| N                           | 4.450853  | 0.798256  | -0.358345 |
| H                           | 5.243542  | 0.956627  | 0.263953  |
| H                           | 1.226152  | -0.157193 | 0.285943  |
| H                           | 1.917303  | 0.208208  | -1.299653 |
| S                           | 1.591364  | 2.218852  | -0.084014 |
| H                           | 4.774193  | 0.181500  | -1.127189 |
| H                           | 4.131250  | 1.709184  | -0.701606 |
| H                           | 1.585238  | 2.269563  | 1.263811  |
| 28                          |           |           |           |
| Dimer 262 of the n...z type |           |           |           |
| C                           | 3.697139  | -0.429164 | -0.534492 |
| C                           | 2.471098  | -0.718404 | -1.412593 |
| N                           | 4.150335  | -1.531630 | 0.319232  |
| H                           | 3.372842  | -2.137804 | 0.570350  |
| H                           | 4.859927  | -2.094214 | -0.134428 |
| H                           | 4.518368  | -0.155867 | -1.206295 |
| C                           | 3.482440  | 0.824002  | 0.336987  |
| O                           | 2.974583  | 1.845055  | -0.069003 |
| O                           | 3.944924  | 0.697217  | 1.580996  |
| H                           | 4.289115  | -0.234147 | 1.617880  |
| H                           | 2.189335  | 0.175365  | -1.966891 |
| H                           | 2.719028  | -1.505884 | -2.124442 |
| S                           | 1.004907  | -1.343657 | -0.486262 |
| H                           | 0.640706  | -0.177112 | 0.101082  |
| C                           | -1.507997 | 1.439225  | 0.091165  |
| C                           | -2.897486 | 0.779286  | 0.375306  |
| O                           | -1.406535 | 2.021364  | -1.015029 |
| O                           | -0.648219 | 1.263380  | 0.977290  |
| H                           | -3.251554 | 1.053254  | 1.367016  |
| C                           | -2.773156 | -0.740235 | 0.249937  |
| N                           | -3.867355 | 1.325213  | -0.638110 |
| H                           | -4.365925 | 2.142155  | -0.284947 |
| H                           | -2.081657 | -1.087862 | 1.014086  |
| H                           | -2.366191 | -1.015499 | -0.725175 |
| S                           | -4.364391 | -1.658571 | 0.379013  |
| H                           | -3.279562 | 1.637527  | -1.432611 |
| H                           | -4.563720 | 0.629022  | -0.922845 |
| H                           | -4.660079 | -1.292759 | 1.643451  |

| Nov 11, 22 15:56       | dimers_structures.xyz | Page 221/325        |
|------------------------|-----------------------|---------------------|
| 28                     |                       |                     |
| Dimer 263 of the n...z | type                  |                     |
| C                      | 2.700788              | -0.620794 0.403260  |
| C                      | 3.293981              | 0.505832 -0.456681  |
| N                      | 2.006771              | -1.694400 -0.295605 |
| H                      | 1.397551              | -1.357923 -1.040027 |
| H                      | 2.651285              | -2.371265 -0.684900 |
| H                      | 3.538299              | -1.069628 0.951536  |
| C                      | 1.784400              | -0.059282 1.503921  |
| O                      | 2.002856              | 0.975770 2.094605   |
| O                      | 0.721692              | -0.815919 1.781521  |
| H                      | 0.735490              | -1.574525 1.145571  |
| H                      | 3.854383              | 1.203184 0.164073   |
| H                      | 3.973749              | 0.071478 -1.189966  |
| S                      | 2.055694              | 1.452475 -1.441437  |
| H                      | 1.535813              | 2.146058 -0.408740  |
| C                      | -1.377081             | -1.618246 -0.773384 |
| C                      | -2.393895             | -0.454335 -0.526042 |
| O                      | -1.281166             | -2.447849 0.166537  |
| O                      | -0.744676             | -1.555741 -1.843345 |
| H                      | -3.019961             | -0.301084 -1.402881 |
| C                      | -1.625118             | 0.819132 -0.175203  |
| N                      | -3.276974             | -0.869986 0.619817  |
| H                      | -4.114910             | -1.355090 0.298547  |
| H                      | -0.981128             | 1.071504 -1.014334  |
| H                      | -0.991721             | 0.650654 0.697215   |
| S                      | -2.679256             | 2.260228 0.274066   |
| H                      | -2.710829             | -1.549518 1.160244  |
| H                      | -3.571103             | -0.072122 1.191890  |
| H                      | -3.316600             | 2.371812 -0.909534  |
| 28                     |                       |                     |
| Dimer 264 of the n...z | type                  |                     |
| C                      | 2.086738              | -0.003759 -0.587709 |
| C                      | 3.543690              | 0.001730 -1.065898  |
| N                      | 1.428948              | 1.302095 -0.485930  |
| H                      | 2.089834              | 2.019048 -0.194476  |
| H                      | 1.030944              | 1.589848 -1.372435  |
| H                      | 1.513246              | -0.613957 -1.295223 |
| C                      | 1.934501              | -0.744548 0.752685  |
| O                      | 2.542580              | -1.750088 1.038984  |
| O                      | 1.028256              | -0.201023 1.570291  |
| H                      | 0.731557              | 0.621586 1.104603   |
| H                      | 3.925151              | -1.016180 -1.125253 |
| H                      | 3.594604              | 0.450968 -2.057753  |
| S                      | 4.677335              | 1.010140 -0.017789  |
| H                      | 4.685291              | 0.181659 1.046516   |
| C                      | -3.497678             | 1.409239 0.175296   |
| C                      | -2.945769             | -0.044339 0.371800  |
| O                      | -4.635277             | 1.475863 -0.356130  |
| O                      | -2.731369             | 2.320721 0.532871   |
| H                      | -2.549694             | -0.164933 1.378110  |
| C                      | -1.864819             | -0.323727 -0.670148 |
| N                      | -4.106812             | -0.987804 0.202767  |
| H                      | -4.552686             | -1.209193 1.093280  |
| H                      | -1.062506             | 0.396366 -0.525581  |
| H                      | -2.257207             | -0.192022 -1.680730 |
| S                      | -1.191571             | -2.039238 -0.641397 |
| H                      | -4.792396             | -0.457929 -0.368182 |
| H                      | -3.833315             | -1.869461 -0.241478 |
| H                      | -0.723497             | -2.001625 0.623444  |
| 28                     |                       |                     |
| Dimer 265 of the n...z | type                  |                     |
| C                      | 2.012628              | -0.703561 0.433185  |
| C                      | 3.530603              | -0.702132 0.695167  |
| N                      | 1.655034              | -1.537092 -0.699795 |
| H                      | 1.972335              | -1.103967 -1.562375 |
| H                      | 0.639617              | -1.592541 -0.734743 |
| H                      | 1.542247              | -1.123194 1.326052  |
| C                      | 1.508006              | 0.735456 0.320332   |

| Nov 11, 22 15:56       | dimers_structures.xyz | Page 222/325        |
|------------------------|-----------------------|---------------------|
| O                      | 1.192317              | 1.285165 -0.710131  |
| O                      | 1.485767              | 1.353790 1.517830   |
| H                      | 1.194240              | 2.271086 1.390441   |
| H                      | 3.765804              | -0.138393 1.596962  |
| H                      | 3.853495              | -1.733767 0.835168  |
| S                      | 4.573070              | -0.073510 -0.692184 |
| H                      | 4.260396              | 1.232735 -0.568321  |
| C                      | -2.236197             | -1.330914 0.424022  |
| C                      | -2.755496             | -0.571819 -0.843653 |
| O                      | -3.119407             | -1.939232 1.077317  |
| O                      | -1.008954             | -1.264346 0.626828  |
| H                      | -2.561472             | -1.214179 -1.705632 |
| C                      | -2.107695             | 0.785205 -1.078786  |
| N                      | -4.250936             | -0.467569 -0.703946 |
| H                      | -4.757443             | -0.547098 -1.585447 |
| H                      | -2.493939             | 1.252369 -1.985741  |
| H                      | -1.035243             | 0.647524 -1.186655  |
| S                      | -2.421425             | 1.999186 0.272732   |
| H                      | -4.502882             | -1.233369 -0.050942 |
| H                      | -4.503189             | 0.418237 -0.251616  |
| H                      | -1.737841             | 1.329942 1.223912   |
| 28                     |                       |                     |
| Dimer 266 of the n...z | type                  |                     |
| C                      | 2.989102              | 0.500240 0.289860   |
| C                      | 3.036356              | -1.001285 0.602816  |
| N                      | 2.408836              | 1.361394 1.324429   |
| H                      | 1.692550              | 0.863751 1.848037   |
| H                      | 3.109593              | 1.688482 1.978721   |
| H                      | 4.021353              | 0.826325 0.118139   |
| C                      | 2.275779              | 0.777644 -1.047147  |
| O                      | 2.396376              | 0.086544 -2.032901  |
| O                      | 1.530013              | 1.884389 -1.034599  |
| H                      | 1.601175              | 2.216850 -0.101147  |
| H                      | 3.455447              | -1.545112 -0.242178 |
| H                      | 3.673895              | -1.165579 1.471703  |
| S                      | 1.407708              | -1.740276 1.051495  |
| H                      | 0.842012              | -1.703447 -0.176503 |
| C                      | -1.781884             | -1.604634 -0.631516 |
| C                      | -2.500517             | -0.222957 -0.479739 |
| O                      | -2.084599             | -2.461541 0.235024  |
| O                      | -0.952351             | -1.675323 -1.558392 |
| H                      | -2.914654             | 0.098656 -1.433161  |
| C                      | -1.501413             | 0.805502 0.049511   |
| N                      | -3.637766             | -0.417259 0.487494  |
| H                      | -4.514129             | -0.624556 0.008301  |
| H                      | -0.720323             | 0.938995 -0.693824  |
| H                      | -1.031846             | 0.447725 0.967942   |
| S                      | -2.222472             | 2.441647 0.487736   |
| H                      | -3.375436             | -1.254541 1.040633  |
| H                      | -3.787159             | 0.406261 1.079276   |
| H                      | -2.633802             | 2.775708 -0.752867  |
| 28                     |                       |                     |
| Dimer 267 of the n...z | type                  |                     |
| C                      | -2.374196             | -0.508027 -0.781072 |
| C                      | -1.467473             | -1.219793 0.230821  |
| N                      | -1.869157             | 0.735836 -1.367114  |
| H                      | -1.304904             | 1.262099 -0.705079  |
| H                      | -1.325954             | 0.573464 -2.205969  |
| H                      | -2.550882             | -1.214986 -1.599755 |
| C                      | -3.776106             | -0.244940 -0.194117 |
| O                      | -4.349579             | -1.009776 0.548428  |
| O                      | -4.323482             | 0.898947 -0.605649  |
| H                      | -3.619604             | 1.324404 -1.159993  |
| H                      | -1.960783             | -2.116578 0.602084  |
| H                      | -0.525483             | -1.509196 -0.238724 |
| S                      | -0.968294             | -0.180190 1.669312  |
| H                      | -2.192896             | -0.024164 2.212118  |
| C                      | 2.754013              | -1.492879 -0.420563 |
| C                      | 2.497103              | -0.117904 0.282892  |



| Nov 11, 22 15:56            |           |           |           | dimers_structures.xyz | Page 223/325 |
|-----------------------------|-----------|-----------|-----------|-----------------------|--------------|
| O                           | 3.956924  | -1.743845 | -0.679169 |                       |              |
| O                           | 1.728307  | -2.152370 | -0.671220 |                       |              |
| H                           | 1.853896  | -0.256695 | 1.148830  |                       |              |
| C                           | 1.864568  | 0.850482  | -0.713166 |                       |              |
| N                           | 3.824583  | 0.399999  | 0.768517  |                       |              |
| H                           | 4.012448  | 0.116255  | 1.730724  |                       |              |
| H                           | 0.957533  | 0.389391  | -1.096795 |                       |              |
| H                           | 2.530894  | 1.024240  | -1.560828 |                       |              |
| S                           | 1.487606  | 2.522314  | -0.038423 |                       |              |
| H                           | 4.529236  | -0.063320 | 0.166056  |                       |              |
| H                           | 3.891133  | 1.420629  | 0.723114  |                       |              |
| H                           | 0.623564  | 2.104353  | 0.912270  |                       |              |
| 28                          |           |           |           |                       |              |
| Dimer 268 of the n...z type |           |           |           |                       |              |
| C                           | -2.913739 | 0.623747  | 0.190477  |                       |              |
| C                           | -2.960786 | -0.047570 | -1.189186 |                       |              |
| N                           | -2.339408 | 1.972075  | 0.234120  |                       |              |
| H                           | -1.644514 | 2.094973  | -0.498568 |                       |              |
| H                           | -3.047055 | 2.688162  | 0.123353  |                       |              |
| H                           | -3.945668 | 0.682044  | 0.554318  |                       |              |
| C                           | -2.194685 | -0.261768 | 1.227790  |                       |              |
| O                           | -2.338854 | -1.460926 | 1.302279  |                       |              |
| O                           | -1.419243 | 0.423342  | 2.069340  |                       |              |
| H                           | -1.491660 | 1.363288  | 1.756432  |                       |              |
| H                           | -3.353353 | -1.058960 | -1.099322 |                       |              |
| H                           | -3.620586 | 0.523721  | -1.842380 |                       |              |
| S                           | -1.343133 | -0.101823 | -2.072587 |                       |              |
| H                           | -0.740953 | -1.063996 | -1.333394 |                       |              |
| C                           | 1.524262  | -1.782662 | 0.384579  |                       |              |
| C                           | 2.472028  | -0.555045 | 0.176224  |                       |              |
| O                           | 0.976248  | -2.206792 | -0.668480 |                       |              |
| O                           | 1.388227  | -2.163503 | 1.557788  |                       |              |
| H                           | 3.348047  | -0.634094 | 0.816009  |                       |              |
| C                           | 1.698017  | 0.732101  | 0.457814  |                       |              |
| N                           | 2.931508  | -0.576509 | -1.257581 |                       |              |
| H                           | 3.770903  | -1.143755 | -1.380039 |                       |              |
| H                           | 1.330255  | 0.702261  | 1.481124  |                       |              |
| H                           | 0.837828  | 0.807821  | -0.209795 |                       |              |
| S                           | 2.650320  | 2.281736  | 0.167556  |                       |              |
| H                           | 2.167474  | -1.029898 | -1.786491 |                       |              |
| H                           | 3.128990  | 0.365066  | -1.612085 |                       |              |
| H                           | 3.598984  | 2.066005  | 1.101965  |                       |              |
| 28                          |           |           |           |                       |              |
| Dimer 269 of the n...z type |           |           |           |                       |              |
| C                           | 1.550614  | -0.272718 | -0.230986 |                       |              |
| C                           | 2.748669  | -1.109626 | -0.693247 |                       |              |
| N                           | 1.171103  | 0.851440  | -1.094836 |                       |              |
| H                           | 2.001002  | 1.322215  | -1.451631 |                       |              |
| H                           | 0.646087  | 0.530164  | -1.900616 |                       |              |
| H                           | 0.687488  | -0.949545 | -0.155967 |                       |              |
| C                           | 1.739086  | 0.235824  | 1.204429  |                       |              |
| O                           | 2.275518  | -0.402227 | 2.080680  |                       |              |
| O                           | 1.211209  | 1.444932  | 1.432718  |                       |              |
| H                           | 0.889928  | 1.759738  | 0.554929  |                       |              |
| H                           | 2.922815  | -1.932279 | -0.001813 |                       |              |
| H                           | 2.538990  | -1.524103 | -1.679617 |                       |              |
| S                           | 4.312620  | -0.150906 | -0.893491 |                       |              |
| H                           | 4.536609  | 0.056680  | 0.420147  |                       |              |
| C                           | -2.248132 | -1.773078 | 0.180358  |                       |              |
| C                           | -2.341723 | -0.353939 | -0.473338 |                       |              |
| O                           | -3.345299 | -2.359132 | 0.343552  |                       |              |
| O                           | -1.096044 | -2.132039 | 0.489700  |                       |              |
| H                           | -1.598644 | -0.259230 | -1.261346 |                       |              |
| C                           | -2.145938 | 0.722958  | 0.590733  |                       |              |
| N                           | -3.702998 | -0.232386 | -1.103843 |                       |              |
| H                           | -3.701245 | -0.549039 | -2.074028 |                       |              |
| H                           | -1.205932 | 0.536948  | 1.104366  |                       |              |
| H                           | -2.943616 | 0.677621  | 1.335222  |                       |              |
| S                           | -2.173431 | 2.446360  | -0.058565 |                       |              |

| Nov 11, 22 15:56            |           |           |           | dimers_structures.xyz | Page 224/325 |
|-----------------------------|-----------|-----------|-----------|-----------------------|--------------|
| H                           | -4.308351 | -0.880036 | -0.568578 |                       |              |
| H                           | -4.059507 | 0.727204  | -1.087144 |                       |              |
| H                           | -1.087902 | 2.314211  | -0.851163 |                       |              |
| 28                          |           |           |           |                       |              |
| Dimer 270 of the n...z type |           |           |           |                       |              |
| C                           | -1.629311 | -0.224903 | -0.533348 |                       |              |
| C                           | -3.044477 | -0.227283 | -1.125057 |                       |              |
| N                           | -1.206143 | -1.566592 | -0.166040 |                       |              |
| H                           | -1.795838 | -1.921535 | 0.582520  |                       |              |
| H                           | -0.256796 | -1.550553 | 0.194500  |                       |              |
| H                           | -0.954435 | 0.148900  | -1.313156 |                       |              |
| C                           | -1.471301 | 0.798382  | 0.595083  |                       |              |
| O                           | -0.843744 | 0.608084  | 1.614999  |                       |              |
| O                           | -2.083013 | 1.962773  | 0.324910  |                       |              |
| H                           | -1.905978 | 2.586170  | 1.047791  |                       |              |
| H                           | -3.301743 | 0.749287  | -1.528646 |                       |              |
| H                           | -3.080698 | -0.959643 | -1.930930 |                       |              |
| S                           | -4.367329 | -0.745873 | 0.056014  |                       |              |
| H                           | -4.389893 | 0.393237  | 0.777707  |                       |              |
| C                           | 2.107734  | 0.949040  | -1.094187 |                       |              |
| C                           | 2.928050  | 0.788743  | 0.231541  |                       |              |
| O                           | 1.035435  | 1.593994  | -0.976884 |                       |              |
| O                           | 2.619306  | 0.443181  | -2.109637 |                       |              |
| H                           | 3.682593  | 1.579124  | 0.240615  |                       |              |
| C                           | 3.622630  | -0.555624 | 0.395155  |                       |              |
| N                           | 1.992747  | 1.079729  | 1.370901  |                       |              |
| H                           | 2.456923  | 1.449604  | 2.200121  |                       |              |
| H                           | 4.157321  | -0.610287 | 1.344634  |                       |              |
| H                           | 4.341451  | -0.671521 | -0.412142 |                       |              |
| S                           | 2.476199  | -1.999604 | 0.381805  |                       |              |
| H                           | 1.301016  | 1.750645  | 1.002220  |                       |              |
| H                           | 1.454269  | 0.246814  | 1.633421  |                       |              |
| H                           | 2.139829  | -1.888941 | -0.920008 |                       |              |
| 28                          |           |           |           |                       |              |
| Dimer 271 of the n...z type |           |           |           |                       |              |
| C                           | 1.925580  | 0.695036  | -0.447320 |                       |              |
| C                           | 3.245643  | 0.124902  | -1.000610 |                       |              |
| N                           | 2.149287  | 1.740640  | 0.534755  |                       |              |
| H                           | 2.605302  | 1.350341  | 1.354948  |                       |              |
| H                           | 1.240734  | 2.094355  | 0.827458  |                       |              |
| H                           | 1.401591  | 1.132673  | -1.300557 |                       |              |
| C                           | 1.048525  | -0.445022 | 0.069593  |                       |              |
| O                           | 0.951845  | -0.784198 | 1.223999  |                       |              |
| O                           | 0.392190  | -1.080175 | -0.934200 |                       |              |
| H                           | -0.178017 | -1.769922 | -0.540471 |                       |              |
| H                           | 3.047933  | -0.608199 | -1.782018 |                       |              |
| H                           | 3.816425  | 0.946716  | -1.433561 |                       |              |
| S                           | 4.380094  | -0.619186 | 0.249020  |                       |              |
| H                           | 3.641073  | -1.712855 | 0.525372  |                       |              |
| C                           | -1.905203 | 1.350062  | 0.556123  |                       |              |
| C                           | -2.819169 | 0.762636  | -0.572551 |                       |              |
| O                           | -0.857407 | 1.909661  | 0.144109  |                       |              |
| O                           | -2.329497 | 1.221505  | 1.717655  |                       |              |
| H                           | -3.558680 | 1.530949  | -0.812940 |                       |              |
| C                           | -3.568120 | -0.513786 | -0.213815 |                       |              |
| N                           | -1.970835 | 0.612420  | -1.808677 |                       |              |
| H                           | -2.513254 | 0.515600  | -2.668124 |                       |              |
| H                           | -4.133927 | -0.892349 | -1.066328 |                       |              |
| H                           | -4.272794 | -0.273301 | 0.578734  |                       |              |
| S                           | -2.528203 | -1.925111 | 0.361307  |                       |              |
| H                           | -1.374063 | 1.448001  | -1.853622 |                       |              |
| H                           | -1.324695 | -0.181533 | -1.725640 |                       |              |
| H                           | -2.097632 | -1.320459 | 1.487944  |                       |              |
| 28                          |           |           |           |                       |              |
| Dimer 272 of the n...z type |           |           |           |                       |              |
| C                           | 2.900128  | -0.918592 | 0.662478  |                       |              |
| C                           | 2.639120  | -1.707029 | -0.626649 |                       |              |
| N                           | 1.817147  | -0.923586 | 1.650339  |                       |              |
| H                           | 0.911192  | -1.025447 | 1.202169  |                       |              |

| Nov 11, 22 15:56 dimers_structures.xyz Page 225/325 |           |           |           |
|-----------------------------------------------------|-----------|-----------|-----------|
| H                                                   | 1.921936  | -1.675009 | 2.321418  |
| H                                                   | 3.790464  | -1.352194 | 1.131247  |
| C                                                   | 3.291952  | 0.540325  | 0.356278  |
| O                                                   | 4.019664  | 0.862107  | -0.556394 |
| O                                                   | 2.772722  | 1.424084  | 1.206989  |
| H                                                   | 2.201063  | 0.879062  | 1.809041  |
| H                                                   | 3.521326  | -1.696562 | -1.264026 |
| H                                                   | 2.403792  | -2.741118 | -0.375138 |
| S                                                   | 1.197279  | -1.100379 | -1.606914 |
| H                                                   | 1.798363  | -0.000798 | -2.105139 |
| C                                                   | -3.370347 | -0.973572 | 0.551237  |
| C                                                   | -2.375136 | -0.045217 | -0.220926 |
| O                                                   | -4.579272 | -0.840486 | 0.231150  |
| O                                                   | -2.852685 | -1.706170 | 1.413208  |
| H                                                   | -1.524251 | -0.618121 | -0.582349 |
| C                                                   | -1.906593 | 1.086777  | 0.693309  |
| N                                                   | -3.110173 | 0.506014  | -1.413945 |
| H                                                   | -2.965340 | -0.065081 | -2.246511 |
| H                                                   | -1.387452 | 0.647608  | 1.542451  |
| H                                                   | -2.757784 | 1.654858  | 1.074219  |
| S                                                   | -0.824727 | 2.332882  | -0.127436 |
| H                                                   | -4.113498 | 0.443998  | -1.159585 |
| H                                                   | -2.825165 | 1.465139  | -1.635780 |
| H                                                   | 0.157532  | 1.474214  | -0.471169 |
| 28                                                  |           |           |           |
| Dimer 273 of the n...z type                         |           |           |           |
| C                                                   | 2.742014  | 0.994994  | -0.015409 |
| C                                                   | 3.171959  | -0.044508 | 1.034503  |
| N                                                   | 1.815693  | 1.969002  | 0.529642  |
| H                                                   | 0.893099  | 1.564278  | 0.687323  |
| H                                                   | 1.678624  | 2.724336  | -0.134155 |
| H                                                   | 3.662596  | 1.516346  | -0.307071 |
| C                                                   | 2.246977  | 0.316660  | -1.298957 |
| O                                                   | 1.194655  | 0.552902  | -1.847990 |
| O                                                   | 3.132225  | -0.581361 | -1.770031 |
| H                                                   | 2.778642  | -0.973308 | -2.584897 |
| H                                                   | 3.959411  | -0.685150 | 0.642727  |
| H                                                   | 3.555282  | 0.487999  | 1.904444  |
| S                                                   | 1.815874  | -1.106225 | 1.693615  |
| H                                                   | 1.627522  | -1.857637 | 0.589015  |
| C                                                   | -2.237403 | 1.304260  | 0.328928  |
| C                                                   | -2.909613 | -0.064505 | 0.686748  |
| O                                                   | -2.843571 | 1.986783  | -0.535582 |
| O                                                   | -1.201991 | 1.574402  | 0.963932  |
| H                                                   | -3.382888 | 0.058017  | 1.662814  |
| C                                                   | -1.942702 | -1.243014 | 0.750373  |
| N                                                   | -4.010195 | -0.286433 | -0.315351 |
| H                                                   | -4.865945 | -0.669834 | 0.083901  |
| H                                                   | -2.434440 | -2.131373 | 1.148357  |
| H                                                   | -1.119641 | -0.970792 | 1.407710  |
| S                                                   | -1.270367 | -1.755983 | -0.885773 |
| H                                                   | -4.167880 | 0.654919  | -0.727243 |
| H                                                   | -3.682312 | -0.902899 | -1.068730 |
| H                                                   | -0.546597 | -0.642682 | -1.129439 |
| 28                                                  |           |           |           |
| Dimer 274 of the n...z type                         |           |           |           |
| C                                                   | 1.676738  | 0.121581  | 0.375659  |
| C                                                   | 2.881643  | 1.078942  | 0.444625  |
| N                                                   | 1.650978  | -0.805902 | 1.490638  |
| H                                                   | 2.431451  | -1.452727 | 1.420154  |
| H                                                   | 0.791507  | -1.347518 | 1.430505  |
| H                                                   | 0.786356  | 0.752317  | 0.432221  |
| C                                                   | 1.635236  | -0.555451 | -0.995350 |
| O                                                   | 1.980598  | -1.689375 | -1.229623 |
| O                                                   | 1.195637  | 0.292219  | -1.951026 |
| H                                                   | 1.222533  | -0.161171 | -2.808940 |
| H                                                   | 2.838147  | 1.809571  | -0.362095 |
| H                                                   | 2.841371  | 1.609007  | 1.396309  |
| S                                                   | 4.539958  | 0.270309  | 0.435497  |

| Nov 11, 22 15:56 dimers_structures.xyz Page 226/325 |           |           |           |
|-----------------------------------------------------|-----------|-----------|-----------|
| H                                                   | 4.524685  | -0.145593 | -0.847472 |
| C                                                   | -2.297759 | -1.242896 | 0.410515  |
| C                                                   | -2.903150 | -0.298374 | -0.682981 |
| O                                                   | -3.139063 | -1.789924 | 1.164964  |
| O                                                   | -1.058131 | -1.359910 | 0.388998  |
| H                                                   | -2.946205 | -0.869242 | -1.612822 |
| C                                                   | -2.110031 | 0.979082  | -0.922505 |
| N                                                   | -4.323935 | -0.014898 | -0.275735 |
| H                                                   | -4.976132 | 0.049337  | -1.057129 |
| H                                                   | -2.560775 | 1.578903  | -1.714469 |
| H                                                   | -1.102972 | 0.707371  | -1.227377 |
| S                                                   | -2.035396 | 2.092988  | 0.545148  |
| H                                                   | -4.570128 | -0.796942 | 0.360353  |
| H                                                   | -4.369713 | 0.853143  | 0.269685  |
| H                                                   | -1.400803 | 1.225013  | 1.360146  |
| 28                                                  |           |           |           |
| Dimer 275 of the n...z type                         |           |           |           |
| C                                                   | 2.599835  | 0.621669  | 0.923218  |
| C                                                   | 3.190158  | -0.734850 | 0.501769  |
| N                                                   | 1.555344  | 0.464895  | 1.917487  |
| H                                                   | 0.763199  | -0.074513 | 1.566258  |
| H                                                   | 1.189205  | 1.371962  | 2.187807  |
| H                                                   | 3.427203  | 1.184672  | 1.373538  |
| C                                                   | 2.182202  | 1.434236  | -0.308667 |
| O                                                   | 1.078536  | 1.886629  | -0.504530 |
| O                                                   | 3.208180  | 1.599471  | -1.167145 |
| H                                                   | 2.902402  | 2.123984  | -1.924611 |
| H                                                   | 4.107014  | -0.597482 | -0.067147 |
| H                                                   | 3.418895  | -1.303413 | 1.402590  |
| S                                                   | 2.048741  | -1.806029 | -0.479454 |
| H                                                   | 2.245050  | -1.201285 | -1.668805 |
| C                                                   | -1.536730 | -1.322849 | 0.411830  |
| C                                                   | -1.457321 | -0.144404 | -0.610405 |
| O                                                   | -1.983929 | -2.403121 | -0.049018 |
| O                                                   | -1.123560 | -1.065919 | 1.559093  |
| H                                                   | -0.413202 | -0.056985 | -0.913272 |
| C                                                   | -1.919798 | 1.198753  | -0.063966 |
| N                                                   | -2.242296 | -0.564759 | -1.823565 |
| H                                                   | -1.824005 | -0.276280 | -2.707140 |
| H                                                   | -1.777640 | 1.989789  | -0.800465 |
| H                                                   | -1.316624 | 1.435466  | 0.807283  |
| S                                                   | -3.708663 | 1.250396  | 0.379359  |
| H                                                   | -2.293567 | -1.598993 | -1.745553 |
| H                                                   | -3.201427 | -0.203896 | -1.772964 |
| H                                                   | -3.642988 | 0.344325  | 1.376670  |
| 28                                                  |           |           |           |
| Dimer 276 of the n...z type                         |           |           |           |
| C                                                   | 3.057573  | -0.269556 | -0.327549 |
| C                                                   | 3.102219  | 0.108750  | 1.158116  |
| N                                                   | 2.752820  | 0.811144  | -1.268208 |
| H                                                   | 2.102635  | 1.482893  | -0.867546 |
| H                                                   | 3.587621  | 1.309074  | -1.553095 |
| H                                                   | 4.044506  | -0.669979 | -0.586579 |
| C                                                   | 2.087509  | -1.438866 | -0.582508 |
| O                                                   | 1.947682  | -2.374571 | 0.172485  |
| O                                                   | 1.422755  | -1.341360 | -1.734336 |
| H                                                   | 1.712876  | -0.471447 | -2.113974 |
| H                                                   | 3.398503  | -0.749043 | 1.759168  |
| H                                                   | 3.833539  | 0.903854  | 1.304026  |
| S                                                   | 1.514776  | 0.776318  | 1.821145  |
| H                                                   | 0.868027  | -0.404423 | 1.902162  |
| C                                                   | -3.021556 | -1.191308 | 0.095647  |
| C                                                   | -2.738134 | 0.337404  | -0.096489 |
| O                                                   | -2.761453 | -1.635202 | 1.242970  |
| O                                                   | -3.427684 | -1.789951 | -0.915839 |
| H                                                   | -3.558738 | 0.818561  | -0.624470 |
| C                                                   | -1.423025 | 0.509593  | -0.857230 |
| N                                                   | -2.637360 | 0.947240  | 1.275443  |
| H                                                   | -3.543215 | 1.272546  | 1.613608  |

| Nov 11, 22 15:56            |           |           | dimers_structures.xyz | Page 227/325 |
|-----------------------------|-----------|-----------|-----------------------|--------------|
| H                           | -1.540422 | 0.086649  | -1.852256             |              |
| H                           | -0.621206 | -0.030909 | -0.354609             |              |
| S                           | -0.815881 | 2.244013  | -0.979962             |              |
| H                           | -2.334076 | 0.172355  | 1.892544              |              |
| H                           | -1.985298 | 1.738197  | 1.299837              |              |
| H                           | -1.793199 | 2.700266  | -1.790548             |              |
| 28                          |           |           |                       |              |
| Dimer 277 of the n...z type |           |           |                       |              |
| C                           | 2.811258  | -0.237707 | 0.859191              |              |
| C                           | 3.019263  | -1.293151 | -0.240476             |              |
| N                           | 1.816592  | -0.657254 | 1.827339              |              |
| H                           | 0.877370  | -0.676709 | 1.429247              |              |
| H                           | 1.780351  | 0.002825  | 2.597391              |              |
| H                           | 3.777722  | -0.147188 | 1.371091              |              |
| C                           | 2.550126  | 1.146215  | 0.250446              |              |
| O                           | 1.610587  | 1.858617  | 0.516446              |              |
| O                           | 3.511708  | 1.496089  | -0.627396             |              |
| H                           | 3.311041  | 2.379142  | -0.977140             |              |
| H                           | 3.878527  | -1.043734 | -0.859361             |              |
| H                           | 3.199533  | -2.255082 | 0.238397              |              |
| S                           | 1.564948  | -1.571027 | -1.341566             |              |
| H                           | 1.695778  | -0.448137 | -2.077211             |              |
| C                           | -2.183035 | -1.015623 | 0.882699              |              |
| C                           | -1.995982 | -0.558038 | -0.601951             |              |
| O                           | -3.262145 | -1.614719 | 1.121323              |              |
| O                           | -1.236501 | -0.761428 | 1.650849              |              |
| H                           | -1.352005 | -1.296552 | -1.082782             |              |
| C                           | -1.370219 | 0.819210  | -0.769325             |              |
| N                           | -3.347497 | -0.649361 | -1.257532             |              |
| H                           | -3.319572 | -0.953938 | -2.230157             |              |
| H                           | -1.214662 | 1.053048  | -1.823741             |              |
| H                           | -0.407260 | 0.827704  | -0.267600             |              |
| S                           | -2.406180 | 2.192801  | -0.108414             |              |
| H                           | -3.875179 | -1.317761 | -0.664451             |              |
| H                           | -3.827503 | 0.256180  | -1.202792             |              |
| H                           | -2.325762 | 1.824218  | 1.186867              |              |
| 28                          |           |           |                       |              |
| Dimer 278 of the n...z type |           |           |                       |              |
| C                           | 2.920323  | 0.489381  | 0.603545              |              |
| C                           | 3.256768  | -1.014022 | 0.535335              |              |
| N                           | 1.987855  | 0.805270  | 1.672839              |              |
| H                           | 1.021933  | 0.711009  | 1.372789              |              |
| H                           | 2.091849  | 1.777079  | 1.945398              |              |
| H                           | 3.872311  | 0.984367  | 0.821389              |              |
| C                           | 2.478428  | 0.989239  | -0.774326             |              |
| O                           | 1.375842  | 1.409168  | -1.038075             |              |
| O                           | 3.463919  | 0.875362  | -1.683075             |              |
| H                           | 3.134035  | 1.173464  | -2.546338             |              |
| H                           | 4.097524  | -1.187095 | -0.134315             |              |
| H                           | 3.530311  | -1.347245 | 1.535551              |              |
| S                           | 1.892877  | -2.145568 | 0.017367              |              |
| H                           | 1.883566  | -1.826751 | -1.293280             |              |
| C                           | -1.723683 | 1.287656  | 0.496166              |              |
| C                           | -1.525681 | -0.070882 | -0.255233             |              |
| O                           | -1.298844 | 1.290509  | 1.684232              |              |
| O                           | -2.237283 | 2.210184  | -0.157230             |              |
| H                           | -0.611129 | 0.040670  | -0.841339             |              |
| C                           | -2.665079 | -0.464343 | -1.184028             |              |
| N                           | -1.249818 | -1.111727 | 0.795552              |              |
| H                           | -0.404084 | -1.661890 | 0.596271              |              |
| H                           | -2.428633 | -1.380718 | -1.727048             |              |
| H                           | -2.810943 | 0.338276  | -1.903052             |              |
| S                           | -4.257211 | -0.806274 | -0.319661             |              |
| H                           | -1.098854 | -0.547688 | 1.657637              |              |
| H                           | -2.054391 | -1.726455 | 0.943354              |              |
| H                           | -4.435941 | 0.443680  | 0.155386              |              |
| 28                          |           |           |                       |              |
| Dimer 279 of the n...z type |           |           |                       |              |
| C                           | 1.991936  | -0.667384 | 0.550191              |              |

| Nov 11, 22 15:56            |           |           | dimers_structures.xyz | Page 228/325 |
|-----------------------------|-----------|-----------|-----------------------|--------------|
| C                           | 3.423271  | -0.218119 | 0.899284              |              |
| N                           | 1.974496  | -1.705485 | -0.463750             |              |
| H                           | 2.284140  | -1.322912 | -1.352820             |              |
| H                           | 1.007613  | -2.006636 | -0.576256             |              |
| H                           | 1.565376  | -1.078552 | 1.469265              |              |
| C                           | 1.139306  | 0.551513  | 0.194925              |              |
| O                           | 0.814263  | 0.873663  | -0.925474             |              |
| O                           | 0.807017  | 1.264692  | 1.289760              |              |
| H                           | 0.282808  | 2.035329  | 1.016847              |              |
| H                           | 3.411232  | 0.508001  | 1.711200              |              |
| H                           | 3.986136  | -1.093404 | 1.223886              |              |
| S                           | 4.402874  | 0.468958  | -0.505468             |              |
| H                           | 3.732272  | 1.632169  | -0.633171             |              |
| C                           | -1.810599 | -1.417639 | -0.403107             |              |
| C                           | -3.048864 | -0.756859 | 0.292621              |              |
| O                           | -0.898199 | -1.782678 | 0.386335              |              |
| O                           | -1.877898 | -1.538103 | -1.636350             |              |
| H                           | -3.823010 | -1.524543 | 0.353890              |              |
| C                           | -3.615935 | 0.456355  | -0.434706             |              |
| N                           | -2.637510 | -0.435506 | 1.703803              |              |
| H                           | -3.363212 | -0.610853 | 2.398001              |              |
| H                           | -4.543078 | 0.794422  | 0.029985              |              |
| H                           | -3.825170 | 0.165048  | -1.461364             |              |
| S                           | -2.508544 | 1.929838  | -0.426458             |              |
| H                           | -1.803863 | -1.034826 | 1.865441              |              |
| H                           | -2.338208 | 0.543961  | 1.772126              |              |
| H                           | -1.477367 | 1.371202  | -1.095997             |              |
| 28                          |           |           |                       |              |
| Dimer 280 of the n...z type |           |           |                       |              |
| C                           | -2.827620 | -1.235122 | 0.207667              |              |
| C                           | -3.385059 | -0.258585 | -0.841349             |              |
| N                           | -3.056113 | -0.873970 | 1.610238              |              |
| H                           | -3.168095 | 0.133018  | 1.706586              |              |
| H                           | -3.880095 | -1.325330 | 1.988414              |              |
| H                           | -3.296256 | -2.207136 | 0.019479              |              |
| C                           | -1.323495 | -1.498140 | -0.005559             |              |
| O                           | -0.826968 | -1.718643 | -1.087290             |              |
| O                           | -0.617969 | -1.512042 | 1.126147              |              |
| H                           | -1.289375 | -1.305281 | 1.830270              |              |
| H                           | -3.034809 | -0.546622 | -1.831478             |              |
| H                           | -4.474129 | -0.308092 | -0.832303             |              |
| S                           | -2.990636 | 1.515817  | -0.536880             |              |
| H                           | -1.641446 | 1.475217  | -0.750905             |              |
| C                           | 1.007565  | 1.627632  | -0.036213             |              |
| C                           | 2.399721  | 0.946658  | -0.237847             |              |
| O                           | 0.773923  | 2.040234  | 1.124231              |              |
| O                           | 0.276385  | 1.645798  | -1.047848             |              |
| H                           | 2.859229  | 1.288896  | -1.162856             |              |
| C                           | 2.230087  | -0.571438 | -0.237249             |              |
| N                           | 3.277290  | 1.373528  | 0.908595              |              |
| H                           | 3.775045  | 2.240985  | 0.706691              |              |
| H                           | 1.561708  | -0.851849 | -1.047606             |              |
| H                           | 1.763149  | -0.904497 | 0.690549              |              |
| S                           | 3.806398  | -1.517837 | -0.352665             |              |
| H                           | 2.631489  | 1.561685  | 1.694378              |              |
| H                           | 3.970841  | 0.657159  | 1.146815              |              |
| H                           | 4.172145  | -1.081538 | -1.575782             |              |
| 28                          |           |           |                       |              |
| Dimer 281 of the n...z type |           |           |                       |              |
| C                           | 3.045016  | 0.443654  | 1.059060              |              |
| C                           | 3.628038  | -0.953949 | 0.811411              |              |
| N                           | 1.622962  | 0.526737  | 1.386796              |              |
| H                           | 1.040440  | -0.159695 | 0.900016              |              |
| H                           | 1.462259  | 0.427888  | 2.381661              |              |
| H                           | 3.607097  | 0.872768  | 1.897600              |              |
| C                           | 3.337144  | 1.395435  | -0.116922             |              |
| O                           | 4.372969  | 1.395661  | -0.746276             |              |
| O                           | 2.347025  | 2.251559  | -0.361267             |              |
| H                           | 1.635377  | 1.978625  | 0.281301              |              |

| Nov 11, 22 15:56 dimers_structures.xyz Page 229/325 |           |           |           |
|-----------------------------------------------------|-----------|-----------|-----------|
| H                                                   | 4.709667  | -0.894826 | 0.699389  |
| H                                                   | 3.404470  | -1.589948 | 1.668146  |
| S                                                   | 2.931812  | -1.836291 | -0.649779 |
| H                                                   | 3.544883  | -1.084910 | -1.586481 |
| C                                                   | -1.307009 | -0.384345 | -0.440967 |
| C                                                   | -2.866724 | -0.480185 | -0.513926 |
| O                                                   | -0.781260 | -1.043741 | 0.495728  |
| O                                                   | -0.774221 | 0.359601  | -1.279660 |
| H                                                   | -3.190665 | -0.634415 | -1.540919 |
| C                                                   | -3.479669 | 0.796629  | 0.062267  |
| N                                                   | -3.279996 | -1.678403 | 0.297931  |
| H                                                   | -3.344054 | -2.522441 | -0.271869 |
| H                                                   | -3.155071 | 1.636764  | -0.547743 |
| H                                                   | -3.130535 | 0.961621  | 1.083713  |
| S                                                   | -5.317902 | 0.782412  | 0.187422  |
| H                                                   | -2.510998 | -1.815502 | 0.979479  |
| H                                                   | -4.184225 | -1.540342 | 0.760651  |
| H                                                   | -5.568848 | 0.680084  | -1.134051 |
| 28                                                  |           |           |           |
| Dimer 282 of the n...z type                         |           |           |           |
| C                                                   | 2.747317  | -0.995565 | -0.035031 |
| C                                                   | 3.167583  | 0.081802  | -1.050857 |
| N                                                   | 1.803811  | -1.939698 | -0.601877 |
| H                                                   | 0.883034  | -1.522143 | -0.731840 |
| H                                                   | 1.669127  | -2.718588 | 0.034382  |
| H                                                   | 3.668698  | -1.534154 | 0.219705  |
| C                                                   | 2.280488  | -0.359597 | 1.280311  |
| O                                                   | 1.215518  | -0.568017 | 1.816118  |
| O                                                   | 3.209374  | 0.467216  | 1.796066  |
| H                                                   | 2.873492  | 0.836956  | 2.628659  |
| H                                                   | 3.961086  | 0.706050  | -0.644298 |
| H                                                   | 3.540167  | -0.418989 | -1.944249 |
| S                                                   | 1.806478  | 1.168637  | -1.657378 |
| H                                                   | 1.627160  | 1.878800  | -0.524280 |
| C                                                   | -2.252941 | -1.296361 | -0.350494 |
| C                                                   | -2.925445 | 0.080827  | -0.673935 |
| O                                                   | -2.870944 | -2.007980 | 0.481983  |
| O                                                   | -1.208019 | -1.544331 | -0.979396 |
| H                                                   | -3.403403 | -0.020004 | -1.650241 |
| C                                                   | -1.961238 | 1.262039  | -0.713932 |
| N                                                   | -4.022383 | 0.278914  | 0.336896  |
| H                                                   | -4.874629 | 0.684655  | -0.047281 |
| H                                                   | -2.458214 | 2.160224  | -1.082631 |
| H                                                   | -1.142970 | 1.010597  | -1.385605 |
| S                                                   | -1.275341 | 1.727724  | 0.930657  |
| H                                                   | -4.188997 | -0.673934 | 0.717074  |
| H                                                   | -3.686108 | 0.866414  | 1.109150  |
| H                                                   | -0.538657 | 0.613864  | 1.129321  |
| 28                                                  |           |           |           |
| Dimer 283 of the n...z type                         |           |           |           |
| C                                                   | -1.758738 | -0.762498 | -0.245626 |
| C                                                   | -1.971602 | 0.426335  | -1.190107 |
| N                                                   | -2.691466 | -1.843256 | -0.533801 |
| H                                                   | -3.641945 | -1.544190 | -0.330034 |
| H                                                   | -2.502873 | -2.634770 | 0.073084  |
| H                                                   | -0.743847 | -1.130502 | -0.439419 |
| C                                                   | -1.745320 | -0.346253 | 1.226626  |
| O                                                   | -2.249304 | -0.973445 | 2.128170  |
| O                                                   | -1.076201 | 0.810320  | 1.429993  |
| H                                                   | -1.056912 | 0.995816  | 2.382676  |
| H                                                   | -1.179844 | 1.163538  | -1.076694 |
| H                                                   | -1.957984 | 0.058230  | -2.215634 |
| S                                                   | -3.601793 | 1.276590  | -1.007200 |
| H                                                   | -3.320418 | 1.912352  | 0.148454  |
| C                                                   | 1.819955  | -1.345571 | -0.083993 |
| C                                                   | 3.165058  | -0.547704 | -0.162944 |
| O                                                   | 1.352031  | -1.703378 | -1.197798 |
| O                                                   | 1.374130  | -1.554228 | 1.056659  |
| H                                                   | 3.968957  | -1.247754 | 0.074013  |

| Nov 11, 22 15:56 dimers_structures.xyz Page 230/325 |           |           |           |
|-----------------------------------------------------|-----------|-----------|-----------|
| C                                                   | 3.250119  | 0.645743  | 0.781719  |
| N                                                   | 3.344212  | -0.141341 | -1.600039 |
| H                                                   | 4.311361  | -0.158470 | -1.921811 |
| H                                                   | 4.245147  | 1.091840  | 0.760810  |
| H                                                   | 3.046047  | 0.295356  | 1.790661  |
| S                                                   | 2.091991  | 2.016376  | 0.359071  |
| H                                                   | 2.750744  | -0.807362 | -2.130546 |
| H                                                   | 2.957612  | 0.799177  | -1.745896 |
| H                                                   | 0.949470  | 1.357001  | 0.647035  |
| 28                                                  |           |           |           |
| Dimer 284 of the n...z type                         |           |           |           |
| C                                                   | 2.054038  | -0.462665 | 0.755568  |
| C                                                   | 1.633563  | 1.011436  | 0.733172  |
| N                                                   | 3.325505  | -0.768009 | 1.419297  |
| H                                                   | 3.982829  | 0.001017  | 1.312577  |
| H                                                   | 3.200495  | -0.942248 | 2.409337  |
| H                                                   | 1.264069  | -1.015127 | 1.276923  |
| C                                                   | 2.078163  | -1.068921 | -0.660872 |
| O                                                   | 1.266324  | -0.806521 | -1.520737 |
| O                                                   | 3.064918  | -1.943038 | -0.852668 |
| H                                                   | 3.577897  | -1.923526 | -0.002539 |
| H                                                   | 0.666052  | 1.142373  | 0.248950  |
| H                                                   | 1.559016  | 1.376230  | 1.758283  |
| S                                                   | 2.853223  | 2.126655  | -0.086634 |
| H                                                   | 2.610212  | 1.720929  | -1.349662 |
| C                                                   | -2.375732 | 1.658961  | -0.246380 |
| C                                                   | -2.319195 | 0.249251  | 0.434053  |
| O                                                   | -3.533485 | 2.105859  | -0.445337 |
| O                                                   | -1.272031 | 2.149987  | -0.544051 |
| H                                                   | -1.590362 | 0.245955  | 1.242322  |
| C                                                   | -1.971558 | -0.807405 | -0.613543 |
| N                                                   | -3.677067 | -0.013569 | 1.028596  |
| H                                                   | -3.737671 | 0.309925  | 1.993998  |
| H                                                   | -0.978634 | -0.595843 | -1.004866 |
| H                                                   | -2.683765 | -0.775595 | -1.440807 |
| S                                                   | -2.035513 | -2.546413 | -0.005078 |
| H                                                   | -4.332121 | 0.559340  | 0.466226  |
| H                                                   | -3.920267 | -1.009216 | 1.011644  |
| H                                                   | -1.041666 | -2.441287 | 0.900119  |
| 28                                                  |           |           |           |
| Dimer 285 of the n...z type                         |           |           |           |
| C                                                   | 2.833667  | 0.340869  | 0.939067  |
| C                                                   | 3.574601  | -1.002270 | 0.902350  |
| N                                                   | 1.416338  | 0.285573  | 1.297367  |
| H                                                   | 0.995415  | -0.573471 | 0.951864  |
| H                                                   | 1.282704  | 0.318761  | 2.301117  |
| H                                                   | 3.344572  | 0.970590  | 1.676936  |
| C                                                   | 2.995345  | 1.104303  | -0.388419 |
| O                                                   | 4.012268  | 1.092331  | -1.046250 |
| O                                                   | 1.929147  | 1.818861  | -0.746799 |
| H                                                   | 1.229220  | 1.632404  | -0.073466 |
| H                                                   | 4.621831  | -0.851727 | 0.646325  |
| H                                                   | 3.518704  | -1.470139 | 1.885331  |
| S                                                   | 2.842079  | -2.232373 | -0.260962 |
| H                                                   | 3.214856  | -1.611868 | -1.398960 |
| C                                                   | -3.343795 | -1.478475 | -0.316163 |
| C                                                   | -3.188618 | 0.078100  | -0.422966 |
| O                                                   | -3.984840 | -1.877580 | 0.689609  |
| O                                                   | -2.785972 | -2.131729 | -1.214637 |
| H                                                   | -3.432480 | 0.414326  | -1.428605 |
| C                                                   | -1.761488 | 0.476793  | -0.051152 |
| N                                                   | -4.179656 | 0.686743  | 0.533700  |
| H                                                   | -5.059221 | 0.921372  | 0.073364  |
| H                                                   | -1.081261 | 0.012144  | -0.761632 |
| H                                                   | -1.508390 | 0.118404  | 0.948158  |
| S                                                   | -1.459572 | 2.292916  | 0.011818  |
| H                                                   | -4.373239 | -0.068220 | 1.219986  |
| H                                                   | -3.822645 | 1.535643  | 0.982191  |
| H                                                   | -1.730046 | 2.545906  | -1.285467 |

| Nov 11, 22 15:56       | dimers_structures.xyz | Page 231/325 |
|------------------------|-----------------------|--------------|
| 28                     |                       |              |
| Dimer 286 of the n...z | type                  |              |
| C                      | -1.466196             | 0.092636     |
| C                      | -2.536424             | -0.945315    |
| N                      | -1.618730             | 1.336345     |
| H                      | -2.450656             | 1.825137     |
| H                      | -0.812623             | 1.923414     |
| H                      | -0.504320             | -0.349279    |
| C                      | -1.439167             | 0.266410     |
| O                      | -1.832043             | 1.236383     |
| O                      | -0.940603             | -0.830180    |
| H                      | -0.944476             | -0.684136    |
| H                      | -2.352989             | -1.893748    |
| H                      | -2.482763             | -1.105599    |
| S                      | -4.280583             | -0.429045    |
| H                      | -4.259539             | -0.536491    |
| C                      | 1.940335              | 1.274346     |
| C                      | 3.126050              | 0.491602     |
| O                      | 1.227743              | 1.927071     |
| O                      | 1.852631              | 1.188571     |
| H                      | 4.022960              | 1.100147     |
| C                      | 3.376304              | -0.894795    |
| N                      | 2.845206              | 0.447790     |
| H                      | 3.673445              | 0.549426     |
| H                      | 4.262059              | -1.350877    |
| H                      | 3.539190              | -0.790976    |
| S                      | 2.006577              | -2.093183    |
| H                      | 2.176604              | 1.228610     |
| H                      | 2.364607              | -0.424762    |
| H                      | 1.100034              | -1.508222    |
| 28                     |                       |              |
| Dimer 287 of the n...z | type                  |              |
| C                      | 3.270936              | 0.475301     |
| C                      | 2.845686              | -0.636825    |
| N                      | 4.162008              | -0.035272    |
| H                      | 3.670538              | -0.715960    |
| H                      | 4.452266              | 0.714689     |
| H                      | 3.814099              | 1.214911     |
| C                      | 2.031107              | 1.193741     |
| O                      | 1.652678              | 1.159502     |
| O                      | 1.392183              | 1.866916     |
| H                      | 0.556559              | 2.238924     |
| H                      | 2.217024              | -0.226246    |
| H                      | 3.744064              | -1.054470    |
| S                      | 1.994460              | -2.082403    |
| H                      | 0.801236              | -1.507705    |
| C                      | -2.317528             | -1.255434    |
| C                      | -2.711405             | -0.487837    |
| O                      | -3.288129             | -1.646471    |
| O                      | -1.096196             | -1.406522    |
| H                      | -2.692465             | -1.211975    |
| C                      | -1.797009             | 0.674873     |
| N                      | -4.143929             | -0.057411    |
| H                      | -4.684805             | -0.074773    |
| H                      | -2.110931             | 1.162054     |
| H                      | -0.790677             | 0.287827     |
| S                      | -1.763868             | 2.010327     |
| H                      | -4.530184             | -0.717576    |
| H                      | -4.192796             | 0.884143     |
| H                      | -1.284974             | 1.237843     |
| 28                     |                       |              |
| Dimer 288 of the n...z | type                  |              |
| C                      | -2.506059             | -0.375114    |
| C                      | -3.576319             | -0.715529    |
| N                      | -1.439276             | -1.353678    |
| H                      | -0.932559             | -1.360348    |
| H                      | -0.733312             | -1.131108    |
| H                      | -3.018715             | -0.403904    |
| C                      | -2.034656             | 1.075968     |

| Nov 11, 22 15:56       | dimers_structures.xyz | Page 232/325 |
|------------------------|-----------------------|--------------|
| O                      | -0.884831             | 1.430154     |
| O                      | -3.065774             | 1.943308     |
| H                      | -2.719773             | 2.846008     |
| H                      | -4.441294             | -0.063301    |
| H                      | -3.894163             | -1.746200    |
| S                      | -2.987026             | -0.656622    |
| H                      | -2.936425             | 0.686657     |
| C                      | 1.830447              | -1.352389    |
| C                      | 3.189109              | -0.709554    |
| O                      | 1.708140              | -1.546656    |
| O                      | 1.037719              | -1.615974    |
| H                      | 3.795506              | -1.503833    |
| C                      | 3.042529              | 0.423165     |
| N                      | 3.884158              | -0.260601    |
| H                      | 4.887897              | -0.437235    |
| H                      | 4.016542              | 0.751029     |
| H                      | 2.460225              | 0.050425     |
| S                      | 2.249438              | 1.938092     |
| H                      | 3.396725              | -0.783460    |
| H                      | 3.715059              | 0.740491     |
| H                      | 1.059173              | 1.385261     |
| 28                     |                       |              |
| Dimer 289 of the n...z | type                  |              |
| C                      | -2.060747             | 0.062802     |
| C                      | -3.499184             | 0.609861     |
| N                      | -2.014904             | -1.371368    |
| H                      | -2.432694             | -1.853069    |
| H                      | -1.037483             | -1.650266    |
| H                      | -1.508938             | 0.548326     |
| C                      | -1.388823             | 0.518175     |
| O                      | -1.121333             | -0.192087    |
| O                      | -1.144078             | 1.845478     |
| H                      | -0.777580             | 2.103729     |
| H                      | -3.503514             | 1.695941     |
| H                      | -3.928023             | 0.327302     |
| S                      | -4.663369             | -0.084511    |
| H                      | -4.180197             | 0.576257     |
| C                      | 1.703622              | -1.238998    |
| C                      | 2.132065              | -0.251389    |
| O                      | 2.174282              | -2.398899    |
| O                      | 0.919103              | -0.775071    |
| H                      | 1.322724              | -0.249553    |
| C                      | 2.387671              | 1.176060     |
| N                      | 3.337380              | -0.851492    |
| H                      | 3.386071              | -0.674190    |
| H                      | 2.626414              | 1.827250     |
| H                      | 1.484547              | 1.544879     |
| S                      | 3.807327              | 1.335751     |
| H                      | 3.268992              | -1.866050    |
| H                      | 4.195544              | -0.504458    |
| H                      | 3.252072              | 0.619658     |
| 28                     |                       |              |
| Dimer 290 of the n...z | type                  |              |
| C                      | -2.781903             | 0.399351     |
| C                      | -1.546211             | 1.286511     |
| N                      | -3.962013             | 0.968107     |
| H                      | -3.843335             | 0.973682     |
| H                      | -4.777447             | 0.395749     |
| H                      | -2.938901             | 0.379720     |
| C                      | -2.495964             | -1.047191    |
| O                      | -3.014824             | -1.616124    |
| O                      | -1.588760             | -1.635587    |
| H                      | -1.433171             | -2.534991    |
| H                      | -0.688827             | 0.910922     |
| H                      | -1.774148             | 2.290358     |
| S                      | -1.066883             | 1.494750     |
| H                      | -0.536338             | 0.256903     |
| C                      | 1.780914              | -0.962666    |
| C                      | 2.681712              | -0.994948    |

| Nov 11, 22 15:56 dimers_structures.xyz Page 233/325 |           |           |           |
|-----------------------------------------------------|-----------|-----------|-----------|
| O                                                   | 0.620329  | -1.434741 | 0.979338  |
| O                                                   | 2.303706  | -0.488623 | 2.154326  |
| H                                                   | 3.406580  | -1.799630 | -0.011701 |
| C                                                   | 3.429830  | 0.309751  | -0.404673 |
| N                                                   | 1.794480  | -1.374207 | -1.300673 |
| H                                                   | 2.192809  | -2.079316 | -1.919392 |
| H                                                   | 4.146935  | 0.195585  | -1.218439 |
| H                                                   | 3.967422  | 0.576016  | 0.502242  |
| S                                                   | 2.342990  | 1.707014  | -0.921197 |
| H                                                   | 0.923429  | -1.717482 | -0.847244 |
| H                                                   | 1.550946  | -0.541253 | -1.849336 |
| H                                                   | 1.585204  | 1.763962  | 0.198053  |
| 28                                                  |           |           |           |
| Dimer 291 of the n...z type                         |           |           |           |
| C                                                   | -2.568153 | 0.272629  | 1.094718  |
| C                                                   | -2.539525 | 1.584710  | 0.293975  |
| N                                                   | -1.318945 | 0.060706  | 1.805270  |
| H                                                   | -0.555904 | -0.040915 | 1.141826  |
| H                                                   | -1.356220 | -0.807110 | 2.330665  |
| H                                                   | -3.372559 | 0.383179  | 1.832038  |
| C                                                   | -2.985048 | -0.904095 | 0.203407  |
| O                                                   | -2.351686 | -1.921779 | 0.054498  |
| O                                                   | -4.167781 | -0.673644 | -0.400443 |
| H                                                   | -4.397667 | -1.443123 | -0.945735 |
| H                                                   | -3.526033 | 1.819241  | -0.099756 |
| H                                                   | -2.226877 | 2.388555  | 0.959650  |
| S                                                   | -1.329122 | 1.615999  | -1.101259 |
| H                                                   | -2.051199 | 0.869670  | -1.962189 |
| C                                                   | 2.667948  | 1.165611  | 0.082517  |
| C                                                   | 3.266777  | -0.282170 | 0.149747  |
| O                                                   | 2.233949  | 1.609869  | 1.177648  |
| O                                                   | 2.718539  | 1.716313  | -1.030226 |
| H                                                   | 4.352901  | -0.181999 | 0.106721  |
| C                                                   | 2.807338  | -1.202276 | -0.977646 |
| N                                                   | 2.922449  | -0.831508 | 1.507687  |
| H                                                   | 3.683487  | -1.334701 | 1.961359  |
| H                                                   | 3.360166  | -2.142591 | -0.965621 |
| S                                                   | 2.996440  | -0.697921 | -1.922426 |
| H                                                   | 1.032949  | -1.689600 | -0.870500 |
| H                                                   | 2.644949  | 0.014215  | 2.048411  |
| H                                                   | 2.101438  | -1.444946 | 1.443576  |
| H                                                   | 0.501122  | -0.460853 | -1.063210 |
| 28                                                  |           |           |           |
| Dimer 292 of the n...z type                         |           |           |           |
| C                                                   | 1.737743  | 0.033683  | -0.172009 |
| C                                                   | 2.755998  | 0.949690  | -0.873973 |
| N                                                   | 1.029130  | 0.729828  | 0.886156  |
| H                                                   | 1.676723  | 0.984001  | 1.626695  |
| H                                                   | 0.333216  | 0.105116  | 1.286372  |
| H                                                   | 1.016610  | -0.260646 | -0.942017 |
| C                                                   | 2.408193  | -1.265950 | 0.284395  |
| O                                                   | 2.524514  | -1.625986 | 1.431950  |
| O                                                   | 2.870790  | -1.977641 | -0.763227 |
| H                                                   | 3.294812  | -2.785288 | -0.431410 |
| H                                                   | 3.208762  | 0.443004  | -1.724197 |
| H                                                   | 2.230387  | 1.834255  | -1.233186 |
| S                                                   | 4.095019  | 1.606201  | 0.213446  |
| H                                                   | 4.805430  | 0.464440  | 0.318851  |
| C                                                   | -1.619838 | -0.822858 | -0.523062 |
| C                                                   | -2.067052 | 0.672521  | -0.401626 |
| O                                                   | -1.685275 | -1.305055 | -1.681060 |
| O                                                   | -1.210668 | -1.349459 | 0.529584  |
| H                                                   | -1.154833 | 1.273119  | -0.390081 |
| C                                                   | -2.878352 | 0.988392  | 0.848060  |
| N                                                   | -2.813176 | 1.010833  | -1.662857 |
| H                                                   | -2.658959 | 1.963180  | -1.992496 |
| H                                                   | -3.111353 | 2.052364  | 0.908224  |
| H                                                   | -2.286538 | 0.713146  | 1.717510  |
| S                                                   | -4.505835 | 0.125780  | 0.916222  |

| Nov 11, 22 15:56 dimers_structures.xyz Page 234/325 |           |           |           |
|-----------------------------------------------------|-----------|-----------|-----------|
| H                                                   | -2.482480 | 0.312761  | -2.354800 |
| H                                                   | -3.820045 | 0.861076  | -1.531419 |
| H                                                   | -4.005402 | -1.124608 | 0.995479  |
| 28                                                  |           |           |           |
| Dimer 293 of the n...z type                         |           |           |           |
| C                                                   | -2.147059 | -0.155768 | 0.767518  |
| C                                                   | -2.262168 | -1.061537 | -0.471736 |
| N                                                   | -3.091573 | -0.548505 | 1.799007  |
| H                                                   | -4.043488 | -0.370465 | 1.490190  |
| H                                                   | -2.947628 | 0.003494  | 2.638355  |
| H                                                   | -1.126920 | -0.286716 | 1.147246  |
| C                                                   | -2.248744 | 1.315683  | 0.366202  |
| O                                                   | -3.090699 | 2.094879  | 0.737275  |
| O                                                   | -1.253390 | 1.674084  | -0.488071 |
| H                                                   | -1.367843 | 2.608075  | -0.729201 |
| H                                                   | -1.492374 | -0.822322 | -1.202365 |
| H                                                   | -2.129844 | -2.094820 | -0.152335 |
| S                                                   | -3.906179 | -1.030189 | -1.310948 |
| H                                                   | -3.776738 | 0.180238  | -1.892032 |
| C                                                   | 1.781091  | -0.862541 | 0.749431  |
| C                                                   | 2.115010  | -0.412735 | -0.710039 |
| O                                                   | 1.028181  | -0.096310 | 1.396786  |
| O                                                   | 2.295943  | -1.944231 | 1.093147  |
| H                                                   | 1.550601  | -1.048864 | -1.395458 |
| C                                                   | 3.599249  | -0.509595 | -1.048853 |
| N                                                   | 1.613074  | 0.991188  | -0.916316 |
| H                                                   | 1.582921  | 1.253017  | -1.903137 |
| H                                                   | 3.792818  | -0.213321 | -2.080866 |
| H                                                   | 3.910320  | -1.543010 | -0.919058 |
| S                                                   | 4.667021  | 0.583146  | -0.015157 |
| H                                                   | 0.671933  | 1.097554  | -0.511229 |
| H                                                   | 2.231888  | 1.647787  | -0.428295 |
| H                                                   | 4.455819  | -0.065149 | 1.148789  |
| 28                                                  |           |           |           |
| Dimer 294 of the n...z type                         |           |           |           |
| C                                                   | 2.718083  | -0.411230 | -0.871687 |
| C                                                   | 1.348415  | 0.026743  | -0.329088 |
| N                                                   | 2.882755  | -1.852986 | -0.793150 |
| H                                                   | 2.861063  | -2.148805 | 0.179376  |
| H                                                   | 3.790841  | -2.124224 | -1.156813 |
| H                                                   | 2.733514  | -0.116169 | -1.927790 |
| C                                                   | 3.851598  | 0.378924  | -0.206559 |
| O                                                   | 4.784651  | -0.108267 | 0.387208  |
| O                                                   | 3.692962  | 1.707566  | -0.368914 |
| H                                                   | 4.432839  | 2.166855  | 0.059862  |
| H                                                   | 1.190504  | 1.090513  | -0.496180 |
| H                                                   | 0.564191  | -0.536176 | -0.833344 |
| S                                                   | 1.070012  | -0.338772 | 1.457955  |
| H                                                   | 1.874214  | 0.622899  | 1.958242  |
| C                                                   | -2.513960 | -1.337170 | -0.090426 |
| C                                                   | -3.279376 | -0.169524 | -0.802367 |
| O                                                   | -3.108151 | -1.835524 | 0.900279  |
| O                                                   | -1.427397 | -1.656597 | -0.603390 |
| H                                                   | -3.690745 | -0.575682 | -1.728468 |
| C                                                   | -2.413162 | 1.041767  | -1.137123 |
| N                                                   | -4.441809 | 0.192535  | 0.081227  |
| H                                                   | -5.309593 | 0.373472  | -0.421600 |
| H                                                   | -2.955834 | 1.747906  | -1.766805 |
| H                                                   | -1.538764 | 0.691834  | -1.681031 |
| S                                                   | -1.883626 | 2.021931  | 0.331501  |
| H                                                   | -4.532337 | -0.624602 | 0.718679  |
| H                                                   | -4.205179 | 1.010578  | 0.655836  |
| H                                                   | -1.089611 | 1.079738  | 0.894233  |
| 28                                                  |           |           |           |
| Dimer 295 of the n...z type                         |           |           |           |
| C                                                   | -1.872489 | -0.073452 | -0.768724 |
| C                                                   | -1.969228 | 1.259504  | -0.009943 |
| N                                                   | -2.746894 | -0.084293 | -1.930083 |
| H                                                   | -3.719392 | -0.063521 | -1.634342 |

| Nov 11, 22 15:56            | dimers_structures.xyz |           | Page 235/325 |
|-----------------------------|-----------------------|-----------|--------------|
| H -2.622014                 | -0.944196             | -2.454445 |              |
| H -0.834159                 | -0.165274             | -1.113071 |              |
| C -2.079112                 | -1.263232             | 0.172277  |              |
| O -2.863002                 | -2.165890             | -0.002107 |              |
| O -1.252043                 | -1.205991             | 1.239438  |              |
| H -1.400317                 | -1.989029             | 1.793569  |              |
| H -1.232988                 | 1.310009              | 0.789523  |              |
| H -1.779117                 | 2.070934              | -0.712024 |              |
| S -3.632974                 | 1.626164              | 0.703065  |              |
| H -3.564133                 | 0.761673              | 1.736324  |              |
| C 1.946620                  | -1.211523             | -0.452431 |              |
| C 1.937071                  | -0.185283             | 0.730872  |              |
| O 2.637821                  | -2.241512             | -0.251592 |              |
| O 1.249338                  | -0.907140             | -1.438256 |              |
| H 1.033008                  | -0.386371             | 1.309406  |              |
| C 1.946687                  | 1.276790              | 0.304751  |              |
| N 3.110736                  | -0.523319             | 1.607836  |              |
| H 2.947793                  | -0.364672             | 2.601624  |              |
| H 1.882610                  | 1.939831              | 1.168670  |              |
| H 1.085203                  | 1.454542              | -0.333784 |              |
| S 3.477059                  | 1.780070              | -0.590303 |              |
| H 3.301175                  | -1.523256             | 1.409451  |              |
| H 3.935339                  | 0.013057              | 1.313973  |              |
| H 3.280521                  | 0.987247              | -1.664011 |              |
| 28                          |                       |           |              |
| Dimer 296 of the n...z type |                       |           |              |
| C -2.485662                 | 0.197308              | 1.013977  |              |
| C -2.428993                 | 1.467162              | 0.147177  |              |
| N -1.167874                 | -0.221874             | 1.451673  |              |
| H -0.609773                 | -0.583052             | 0.677826  |              |
| H -1.251016                 | -0.985448             | 2.115259  |              |
| H -3.075337                 | 0.470095              | 1.898202  |              |
| C -3.291272                 | -0.908024             | 0.318059  |              |
| O -2.903575                 | -2.035738             | 0.124765  |              |
| O -4.514495                 | -0.476273             | -0.052875 |              |
| H -4.990052                 | -1.208540             | -0.476983 |              |
| H -3.429615                 | 1.855516              | -0.030971 |              |
| H -1.849423                 | 2.220948              | 0.679541  |              |
| S -1.573752                 | 1.279412              | -1.475726 |              |
| H -2.500027                 | 0.501061              | -2.072335 |              |
| C 2.175946                  | -1.379554             | -0.492393 |              |
| C 3.008586                  | -0.658767             | 0.622956  |              |
| O 2.828289                  | -1.691881             | -1.520474 |              |
| O 0.979038                  | -1.592117             | -0.225621 |              |
| H 3.247934                  | -1.410191             | 1.378326  |              |
| C 2.307076                  | 0.514673              | 1.296750  |              |
| N 4.307783                  | -0.244624             | -0.013587 |              |
| H 5.119301                  | -0.329862             | 0.597299  |              |
| H 2.917354                  | 0.918658              | 2.105721  |              |
| H 1.360743                  | 0.172284              | 1.709352  |              |
| S 1.983587                  | 1.935841              | 0.169716  |              |
| H 4.388709                  | -0.861066             | -0.845815 |              |
| H 4.239796                  | 0.721894              | -0.352463 |              |
| H 1.066536                  | 1.310413              | -0.598936 |              |
| 28                          |                       |           |              |
| Dimer 297 of the n...z type |                       |           |              |
| C 3.466803                  | -0.816737             | 0.023770  |              |
| C 3.864332                  | 0.583759              | 0.525912  |              |
| N 3.942251                  | -1.045771             | -1.330283 |              |
| H 3.471438                  | -0.412226             | -1.971057 |              |
| H 3.707360                  | -1.986585             | -1.630686 |              |
| C 3.958373                  | -1.531740             | 0.692828  |              |
| C 1.958630                  | -1.027683             | 0.202487  |              |
| O 1.176710                  | -1.204142             | -0.705532 |              |
| O 1.600061                  | -0.972699             | 1.493133  |              |
| H 0.622153                  | -1.056619             | 1.571418  |              |
| H 3.603544                  | 0.703314              | 1.575473  |              |
| H 4.942522                  | 0.698011              | 0.416012  |              |
| S 3.140464                  | 1.985499              | -0.433236 |              |

| Nov 11, 22 15:56            | dimers_structures.xyz |           | Page 236/325 |
|-----------------------------|-----------------------|-----------|--------------|
| H 1.875600                  | 1.868136              | 0.020276  |              |
| C -3.462489                 | -0.233503             | -1.122215 |              |
| C -2.799733                 | 0.940217              | -0.318384 |              |
| O -4.718353                 | -0.263718             | -1.060755 |              |
| O -2.680578                 | -0.976172             | -1.740158 |              |
| H -2.612267                 | 1.748917              | -1.028044 |              |
| C -1.493301                 | 0.584289              | 0.372555  |              |
| N -3.842243                 | 1.443240              | 0.644936  |              |
| H -3.816290                 | 2.450872              | 0.799365  |              |
| H -1.077296                 | 1.441401              | 0.904070  |              |
| H -0.779243                 | 0.254068              | -0.378269 |              |
| S -1.661736                 | -0.747697             | 1.639198  |              |
| H -4.741071                 | 1.147575              | 0.215782  |              |
| H -3.763375                 | 0.967514              | 1.549086  |              |
| H -1.979321                 | -1.727968             | 0.767531  |              |
| 28                          |                       |           |              |
| Dimer 298 of the n...z type |                       |           |              |
| C -2.231694                 | 0.774568              | 0.483583  |              |
| C -1.637056                 | -0.569223             | 0.937501  |              |
| N -3.472805                 | 1.068795              | 1.179884  |              |
| H -4.177380                 | 0.378753              | 0.932216  |              |
| H -3.836358                 | 1.970343              | 0.887603  |              |
| H -1.492308                 | 1.538673              | 0.751581  |              |
| C -2.352158                 | 0.830151              | -1.043446 |              |
| O -3.374697                 | 1.022579              | -1.656607 |              |
| O -1.157752                 | 0.642843              | -1.643787 |              |
| H -1.273644                 | 0.692081              | -2.606324 |              |
| H -0.656424                 | -0.744522             | 0.499174  |              |
| H -1.540377                 | -0.549655             | 2.023092  |              |
| S -2.695021                 | -2.039612             | 0.579230  |              |
| H -2.401012                 | -2.140165             | -0.733408 |              |
| C 2.384241                  | -1.241434             | -0.489471 |              |
| C 3.088583                  | -0.407556             | 0.635534  |              |
| O 3.028642                  | -1.329200             | -1.566073 |              |
| O 1.288155                  | -1.741013             | -0.180441 |              |
| H 3.509454                  | -1.119755             | 1.347821  |              |
| C 2.164441                  | 0.549324              | 1.380507  |              |
| N 4.242726                  | 0.307254              | -0.013149 |              |
| H 5.091289                  | 0.332737              | 0.551172  |              |
| H 2.681595                  | 1.025734              | 2.214448  |              |
| H 1.328735                  | -0.024668             | 1.773718  |              |
| S 1.534308                  | 1.938791              | 0.346915  |              |
| H 4.389842                  | -0.214904             | -0.900605 |              |
| H 3.972681                  | 1.266539              | -0.259566 |              |
| H 0.812933                  | 1.192966              | -0.516365 |              |
| 28                          |                       |           |              |
| Dimer 299 of the n...z type |                       |           |              |
| C -3.580555                 | 0.221897              | 1.004070  |              |
| C -2.488349                 | -0.832083             | 0.783143  |              |
| N -4.964031                 | -0.261277             | 0.980320  |              |
| H -5.064617                 | -1.046383             | 0.341496  |              |
| H -5.275231                 | -0.557279             | 1.897681  |              |
| H -3.397797                 | 0.673523              | 1.985830  |              |
| C -3.444569                 | 1.392567              | 0.011010  |              |
| O -2.383214                 | 1.857026              | -0.339728 |              |
| O -4.613407                 | 1.877125              | -0.408661 |              |
| H -5.290069                 | 1.285944              | 0.012927  |              |
| H -1.502944                 | -0.372823             | 0.836878  |              |
| H -2.561154                 | -1.593590             | 1.559785  |              |
| S -2.630150                 | -1.748480             | -0.809703 |              |
| H -2.229634                 | -0.737980             | -1.608163 |              |
| C 4.998500                  | 0.508201              | 0.163817  |              |
| C 3.761405                  | -0.405234             | -0.135522 |              |
| O 5.222382                  | 0.711445              | 1.384255  |              |
| O 5.585999                  | 0.953987              | -0.837529 |              |
| H 4.010022                  | -1.147899             | -0.890835 |              |
| C 2.586955                  | 0.459900              | -0.594140 |              |
| N 3.420782                  | -1.127424             | 1.140047  |              |
| H 3.913804                  | -2.017544             | 1.213587  |              |

| Nov 11, 22 15:56 dimers_structures.xyz Page 237/325 |           |           |           |
|-----------------------------------------------------|-----------|-----------|-----------|
| H                                                   | 2.866060  | 0.950338  | -1.524110 |
| H                                                   | 2.368079  | 1.232154  | 0.146198  |
| S                                                   | 0.997446  | -0.446534 | -0.810338 |
| H                                                   | 3.771559  | -0.513926 | 1.897562  |
| H                                                   | 2.415367  | -1.310487 | 1.223794  |
| H                                                   | 1.408168  | -1.271065 | -1.795510 |
| 28                                                  |           |           |           |
| Dimer 300 of the n...z type                         |           |           |           |
| C                                                   | -2.732823 | -0.880138 | -0.123699 |
| C                                                   | -1.448490 | -0.051452 | 0.049657  |
| N                                                   | -3.001130 | -1.152154 | -1.525402 |
| H                                                   | -3.176225 | -0.279798 | -2.017380 |
| H                                                   | -3.841894 | -1.712810 | -1.621487 |
| H                                                   | -2.549792 | -1.832539 | 0.387551  |
| C                                                   | -3.904851 | -0.227086 | 0.618211  |
| O                                                   | -4.938725 | 0.135222  | 0.107953  |
| O                                                   | -3.648399 | -0.101268 | 1.935625  |
| H                                                   | -4.411724 | 0.316094  | 2.366060  |
| H                                                   | -1.208286 | 0.064462  | 1.104883  |
| H                                                   | -0.623335 | -0.561396 | -0.448529 |
| S                                                   | -1.494462 | 1.619398  | -0.733553 |
| H                                                   | -2.271344 | 2.226322  | 0.187339  |
| C                                                   | 2.325986  | -1.347352 | -0.519044 |
| C                                                   | 2.351510  | -0.533602 | 0.821689  |
| O                                                   | 3.160375  | -2.285827 | -0.581228 |
| O                                                   | 1.471757  | -0.992073 | -1.350753 |
| H                                                   | 1.547708  | -0.923470 | 1.449975  |
| C                                                   | 2.172000  | 0.969756  | 0.657827  |
| N                                                   | 3.647492  | -0.874676 | 1.506859  |
| H                                                   | 3.582519  | -0.927826 | 2.522920  |
| H                                                   | 2.153963  | 1.471200  | 1.626598  |
| H                                                   | 1.225104  | 1.155993  | 0.157529  |
| S                                                   | 3.528532  | 1.779337  | -0.290756 |
| H                                                   | 3.920781  | -1.787131 | 1.093296  |
| H                                                   | 4.370220  | -0.191918 | 1.251908  |
| H                                                   | 3.272599  | 1.161688  | -1.462528 |
| 28                                                  |           |           |           |
| Dimer 301 of the n...z type                         |           |           |           |
| C                                                   | -1.420202 | -0.100336 | 0.571674  |
| C                                                   | -2.264656 | -1.170815 | -0.143388 |
| N                                                   | -1.820510 | 0.056706  | 1.958127  |
| H                                                   | -2.754586 | 0.454277  | 2.008815  |
| H                                                   | -1.199111 | 0.704178  | 2.432509  |
| H                                                   | -0.392550 | -0.476471 | 0.547931  |
| C                                                   | -1.431666 | 1.204556  | -0.225157 |
| O                                                   | -1.894057 | 2.253690  | 0.145101  |
| O                                                   | -0.862746 | 1.047993  | -1.450159 |
| H                                                   | -0.909214 | 1.892486  | -1.927723 |
| H                                                   | -1.893176 | -1.343775 | -1.151629 |
| H                                                   | -2.183106 | -2.099009 | 0.421205  |
| S                                                   | -4.074000 | -0.817946 | -0.222064 |
| H                                                   | -4.023497 | 0.130508  | -1.179928 |
| C                                                   | 2.296609  | -1.515275 | 0.362892  |
| C                                                   | 2.767340  | -0.577645 | -0.799841 |
| O                                                   | 1.272141  | -2.199766 | 0.111055  |
| O                                                   | 2.994787  | -1.487000 | 1.392107  |
| H                                                   | 3.603136  | -1.075132 | -1.297787 |
| C                                                   | 3.219518  | 0.805854  | -0.352572 |
| N                                                   | 1.649252  | -0.518275 | -1.806883 |
| H                                                   | 1.971605  | -0.377022 | -2.764204 |
| H                                                   | 3.460786  | 1.435620  | -1.210115 |
| H                                                   | 4.116565  | 0.692717  | 0.251372  |
| S                                                   | 1.962709  | 1.741736  | 0.618851  |
| H                                                   | 1.154816  | -1.420150 | -1.713681 |
| H                                                   | 0.955717  | 0.209392  | -1.582811 |
| H                                                   | 1.989409  | 0.925358  | 1.692258  |
| 28                                                  |           |           |           |
| Dimer 302 of the n...z type                         |           |           |           |
| C                                                   | -2.220102 | -0.641312 | 0.535377  |

| Nov 11, 22 15:56 dimers_structures.xyz Page 238/325 |           |           |           |
|-----------------------------------------------------|-----------|-----------|-----------|
| C                                                   | -3.639657 | -1.162932 | 0.279172  |
| N                                                   | -2.072267 | 0.337274  | 1.616899  |
| H                                                   | -2.914164 | 0.899093  | 1.719281  |
| H                                                   | -1.876587 | -0.108521 | 2.505079  |
| H                                                   | -1.595923 | -1.509462 | 0.775079  |
| C                                                   | -1.594979 | -0.059113 | -0.747221 |
| O                                                   | -1.725137 | -0.548205 | -1.845603 |
| O                                                   | -0.854521 | 1.030339  | -0.527686 |
| H                                                   | -0.966467 | 1.205016  | 0.445940  |
| H                                                   | -3.633482 | -1.883644 | -0.536725 |
| H                                                   | -4.009602 | -1.657192 | 1.177503  |
| S                                                   | -4.873550 | 0.156610  | -0.089187 |
| H                                                   | -4.400676 | 0.479901  | -1.310229 |
| C                                                   | 3.195503  | -1.586344 | -0.196797 |
| C                                                   | 2.369658  | -0.280208 | 0.053210  |
| O                                                   | 3.752418  | -2.064522 | 0.824507  |
| O                                                   | 3.233437  | -1.974717 | -1.377664 |
| H                                                   | 1.398738  | -0.340979 | -0.432443 |
| C                                                   | 3.145905  | 0.929746  | -0.466805 |
| N                                                   | 2.147410  | -0.170614 | 1.538224  |
| H                                                   | 1.274056  | -0.612932 | 1.825000  |
| H                                                   | 3.276869  | 0.812174  | -1.540302 |
| H                                                   | 4.134488  | 0.983465  | -0.006041 |
| S                                                   | 2.357975  | 2.557235  | -0.105545 |
| H                                                   | 2.924801  | -0.708502 | 1.963786  |
| H                                                   | 2.129127  | 0.804063  | 1.855146  |
| H                                                   | 1.194476  | 2.307203  | -0.741266 |
| 28                                                  |           |           |           |
| Dimer 303 of the n...z type                         |           |           |           |
| C                                                   | 2.398778  | -0.431592 | -0.735466 |
| C                                                   | 1.661906  | 0.896627  | -0.483814 |
| N                                                   | 1.633545  | -1.563405 | -0.239425 |
| H                                                   | 1.611901  | -1.545975 | 0.776804  |
| H                                                   | 2.080517  | -2.435409 | -0.504123 |
| H                                                   | 2.490623  | -0.524455 | -1.823410 |
| C                                                   | 3.830283  | -0.367361 | -0.191949 |
| O                                                   | 4.279376  | -1.080979 | 0.674071  |
| O                                                   | 4.546908  | 0.600926  | -0.796027 |
| H                                                   | 5.440228  | 0.614518  | -0.416493 |
| H                                                   | 2.206057  | 1.728464  | -0.926977 |
| H                                                   | 0.671341  | 0.838324  | -0.937129 |
| S                                                   | 1.340401  | 1.276193  | 1.293449  |
| H                                                   | 2.594291  | 1.636518  | 1.636202  |
| C                                                   | -2.442815 | 1.076007  | -0.878399 |
| C                                                   | -2.284473 | 0.509614  | 0.574562  |
| O                                                   | -3.491711 | 1.741541  | -1.073881 |
| O                                                   | -1.506957 | 0.828250  | -1.660196 |
| H                                                   | -1.614832 | 1.185763  | 1.110627  |
| C                                                   | -1.727422 | -0.905418 | 0.649909  |
| N                                                   | -3.634650 | 0.622407  | 1.230713  |
| H                                                   | -3.599313 | 0.860249  | 2.221558  |
| H                                                   | -1.596110 | -1.219771 | 1.686501  |
| H                                                   | -0.758421 | -0.935752 | 0.156701  |
| S                                                   | -2.825397 | -2.174946 | -0.111945 |
| H                                                   | -4.124505 | 1.353326  | 0.679666  |
| H                                                   | -4.157028 | -0.253245 | 1.113701  |
| H                                                   | -2.715560 | -1.720672 | -1.377512 |
| 28                                                  |           |           |           |
| Dimer 304 of the n...z type                         |           |           |           |
| C                                                   | -1.564014 | -0.030286 | -0.165270 |
| C                                                   | -2.419190 | 1.164223  | -0.615378 |
| N                                                   | -1.425787 | -1.012536 | -1.228357 |
| H                                                   | -2.333228 | -1.414183 | -1.449211 |
| H                                                   | -0.834712 | -1.779409 | -0.921106 |
| H                                                   | -0.575328 | 0.388480  | 0.061685  |
| C                                                   | -2.078368 | -0.613953 | 1.152798  |
| O                                                   | -2.362751 | -1.774227 | 1.339541  |
| O                                                   | -2.162345 | 0.327145  | 2.115430  |
| H                                                   | -2.475093 | -0.089642 | 2.934302  |



| Nov 11, 22 15:56 | dimers_structures.xyz       |           | Page 239/325 |
|------------------|-----------------------------|-----------|--------------|
| H                | -2.417736                   | 1.946418  | 0.140617     |
| H                | -1.993541                   | 1.565738  | -1.534713    |
| S                | -4.168518                   | 0.750833  | -1.042003    |
| H                | -4.608951                   | 0.569059  | 0.220017     |
| C                | 2.464089                    | 1.369498  | 0.389971     |
| C                | 2.989305                    | 0.514173  | -0.815225    |
| O                | 3.352389                    | 1.744436  | 1.195329     |
| O                | 1.240529                    | 1.598848  | 0.398832     |
| H                | 3.105899                    | 1.193146  | -1.662668    |
| C                | 2.081262                    | -0.636570 | -1.224619    |
| N                | 4.368285                    | 0.042520  | -0.438686    |
| H                | 5.024655                    | 0.006304  | -1.218299    |
| H                | 2.486682                    | -1.170983 | -2.084944    |
| H                | 1.108965                    | -0.233980 | -1.498676    |
| S                | 1.869073                    | -1.919389 | 0.083238     |
| H                | 4.677830                    | 0.718007  | 0.286565     |
| H                | 4.319821                    | -0.883390 | 0.000595     |
| H                | 1.327302                    | -1.100690 | 1.008669     |
| 28               | Dimer 305 of the n...z type |           |              |
| C                | 2.740201                    | 0.401273  | 0.946245     |
| C                | 1.382315                    | 0.996242  | 0.531572     |
| N                | 3.832180                    | 1.314224  | 0.659191     |
| H                | 3.933235                    | 1.433516  | -0.345028    |
| H                | 4.709971                    | 0.934018  | 0.998589     |
| H                | 2.684491                    | 0.252674  | 2.029931     |
| C                | 2.909339                    | -0.993367 | 0.331837     |
| O                | 3.729640                    | -1.290439 | -0.504341    |
| O                | 2.012098                    | -1.863733 | 0.832887     |
| H                | 2.130867                    | -2.724662 | 0.400449     |
| H                | 0.570528                    | 0.323891  | 0.803835     |
| H                | 1.244242                    | 1.946498  | 1.046543     |
| S                | 1.230019                    | 1.409002  | -1.261013    |
| H                | 1.189985                    | 0.142933  | -1.725180    |
| C                | -2.978198                   | 0.311119  | 1.124841     |
| C                | -3.077968                   | 0.361377  | -0.439166    |
| O                | -2.496574                   | 1.344264  | 1.655450     |
| O                | -3.408422                   | -0.725925 | 1.661593     |
| H                | -4.101991                   | 0.657977  | -0.680266    |
| C                | -2.778152                   | -0.954947 | -1.143382    |
| N                | -2.192170                   | 1.487163  | -0.898360    |
| H                | -2.546271                   | 1.977902  | -1.718731    |
| H                | -2.819844                   | -0.837253 | -2.227395    |
| H                | -3.536378                   | -1.676461 | -0.848083    |
| S                | -1.112691                   | -1.654392 | -0.782351    |
| H                | -2.140638                   | 2.120539  | -0.079825    |
| H                | -1.222337                   | 1.188691  | -1.094266    |
| H                | -1.332343                   | -1.867235 | 0.531055     |
| 28               | Dimer 306 of the n...z type |           |              |
| C                | 3.355222                    | -0.116539 | -0.705667    |
| C                | 2.146453                    | -1.044045 | -0.913850    |
| N                | 4.509659                    | -0.848747 | -0.216277    |
| H                | 4.309716                    | -1.238979 | 0.700924     |
| H                | 5.300556                    | -0.223272 | -0.100182    |
| H                | 3.596454                    | 0.292711  | -1.694198    |
| C                | 2.976384                    | 1.096152  | 0.155377     |
| O                | 3.551016                    | 1.442600  | 1.159083     |
| O                | 1.912778                    | 1.754034  | -0.351663    |
| H                | 1.717419                    | 2.519547  | 0.212812     |
| H                | 1.334019                    | -0.507546 | -1.398978    |
| H                | 2.448021                    | -1.869269 | -1.558264    |
| S                | 1.518039                    | -1.857015 | 0.618884     |
| H                | 1.083232                    | -0.742884 | 1.242927     |
| C                | -3.417167                   | -0.860540 | 0.514997     |
| C                | -2.065765                   | -0.572719 | -0.223723    |
| O                | -4.329611                   | -1.320960 | -0.218993    |
| O                | -3.425835                   | -0.629436 | 1.736800     |
| H                | -1.405410                   | -1.422816 | -0.036218    |

| Nov 11, 22 15:56 | dimers_structures.xyz       |           | Page 240/325 |
|------------------|-----------------------------|-----------|--------------|
| C                | -1.359081                   | 0.702044  | 0.216816     |
| N                | -2.369068                   | -0.572006 | -1.697618    |
| H                | -1.632587                   | -0.977308 | -2.274491    |
| H                | -0.403490                   | 0.826352  | -0.292972    |
| H                | -1.175857                   | 0.637229  | 1.286800     |
| S                | -2.298687                   | 2.244828  | -0.146376    |
| H                | -3.252512                   | -1.113308 | -1.771763    |
| H                | -2.562436                   | 0.381741  | -2.022587    |
| H                | -3.333963                   | 1.982046  | 0.677810     |
| 28               | Dimer 307 of the n...z type |           |              |
| C                | 2.308735                    | -1.019654 | 0.108599     |
| C                | 3.130382                    | -0.192563 | 1.110907     |
| N                | 3.162681                    | -1.868860 | -0.703847    |
| H                | 3.777449                    | -1.292675 | -1.273201    |
| H                | 2.601952                    | -2.417231 | -1.348317    |
| H                | 1.650930                    | -1.661900 | 0.707840     |
| C                | 1.367432                    | -0.126890 | -0.708623    |
| O                | 1.273398                    | -0.132340 | -1.911371    |
| O                | 0.623994                    | 0.678728  | 0.083102     |
| H                | -0.037103                   | 1.173956  | -0.456083    |
| H                | 2.479111                    | 0.334176  | 1.804879     |
| H                | 3.769364                    | -0.870657 | 1.675711     |
| S                | 4.284196                    | 1.023219  | 0.337768     |
| H                | 3.351060                    | 1.928468  | -0.021423    |
| C                | -2.929555                   | -1.256117 | -0.085210    |
| C                | -2.886435                   | -0.186692 | 1.060369     |
| O                | -2.114884                   | -2.202082 | 0.049111     |
| O                | -3.781571                   | -1.062771 | -0.972311    |
| H                | -3.656125                   | -0.476021 | 1.780242     |
| C                | -3.170353                   | 1.249823  | 0.637962     |
| N                | -1.573746                   | -0.358520 | 1.779444     |
| H                | -1.608370                   | -0.079777 | 2.759884     |
| H                | -2.996301                   | 1.943375  | 1.462020     |
| H                | -4.219983                   | 1.313001  | 0.360520     |
| S                | -2.184756                   | 1.906995  | -0.778590    |
| H                | -1.356679                   | -1.364728 | 1.688874     |
| H                | -0.797381                   | 0.136195  | 1.320239     |
| H                | -2.600230                   | 0.982348  | -1.669476    |
| 28               | Dimer 308 of the n...z type |           |              |
| C                | -2.743561                   | -0.286308 | 0.875460     |
| C                | -1.893876                   | 0.953415  | 0.569525     |
| N                | -2.077861                   | -1.584031 | 0.741185     |
| H                | -1.376926                   | -1.565301 | 0.004607     |
| H                | -1.631703                   | -1.873803 | 1.602950     |
| H                | -3.090096                   | -0.190641 | 1.910698     |
| C                | -4.036539                   | -0.300119 | 0.035537     |
| O                | -4.677794                   | 0.692447  | -0.227195    |
| O                | -4.408145                   | -1.518840 | -0.355214    |
| H                | -3.681763                   | -2.113351 | -0.033806    |
| H                | -2.481646                   | 1.858744  | 0.709370     |
| H                | -1.041238                   | 0.986615  | 1.247626     |
| S                | -1.168131                   | 0.968763  | -1.125329    |
| H                | -2.309541                   | 1.231964  | -1.793014    |
| C                | 3.162024                    | -1.559841 | -0.481104    |
| C                | 2.314794                    | -0.340956 | 0.017044     |
| O                | 3.777548                    | -2.181745 | 0.421392     |
| O                | 3.154377                    | -1.744084 | -1.711309    |
| H                | 1.328325                    | -0.356305 | -0.441258    |
| C                | 3.042905                    | 0.963141  | -0.311903    |
| N                | 2.145027                    | -0.488805 | 1.504751     |
| H                | 1.311478                    | -1.028311 | 1.738218     |
| H                | 3.128800                    | 1.043069  | -1.393293    |
| H                | 4.049779                    | 0.957484  | 0.110657     |
| S                | 2.251713                    | 2.482893  | 0.369102     |
| H                | 2.965577                    | -1.035957 | 1.819703     |
| H                | 2.079147                    | 0.418894  | 1.977565     |
| H                | 1.099949                    | 2.392041  | -0.330677    |

| Nov 11, 22 15:56       | dimers_structures.xyz | Page 241/325 |
|------------------------|-----------------------|--------------|
| 28                     |                       |              |
| Dimer 309 of the n...z | type                  |              |
| C                      | -3.324704             | -0.218370    |
| C                      | -2.376389             | 0.963134     |
| N                      | -4.619942             | 0.245157     |
| H                      | -4.518412             | 0.701941     |
| H                      | -5.246970             | -0.540759    |
| H                      | -3.461670             | -0.728000    |
| C                      | -2.665486             | -1.247311    |
| O                      | -3.069133             | -1.560363    |
| O                      | -1.562382             | -1.787308    |
| H                      | -1.193768             | -2.446600    |
| H                      | -1.440428             | 0.613343     |
| H                      | -2.859111             | 1.626404     |
| S                      | -2.009171             | 2.029318     |
| H                      | -1.148535             | 1.189381     |
| C                      | 3.868822              | 0.641832     |
| C                      | 2.782067              | -0.263909    |
| O                      | 4.937562              | 0.047347     |
| O                      | 3.562200              | 1.838039     |
| H                      | 2.852821              | -0.101743    |
| C                      | 1.354253              | 0.011952     |
| N                      | 3.188156              | -1.690913    |
| H                      | 2.984457              | -2.325667    |
| H                      | 0.641934              | -0.617896    |
| H                      | 1.125393              | 1.055264     |
| S                      | 1.053193              | -0.334890    |
| H                      | 4.207704              | -1.633764    |
| H                      | 2.737368              | -2.043447    |
| H                      | 1.859991              | 0.635308     |
| 28                     |                       |              |
| Dimer 310 of the n...z | type                  |              |
| C                      | -1.980938             | 0.129761     |
| C                      | -2.246785             | -1.377242    |
| N                      | -2.028036             | 0.875932     |
| H                      | -2.698522             | 0.463896     |
| H                      | -1.119510             | 0.903278     |
| H                      | -0.979757             | 0.256532     |
| C                      | -2.915484             | 0.809609     |
| O                      | -3.256065             | 0.302604     |
| O                      | -3.292261             | 2.036238     |
| H                      | -2.899358             | 2.155887     |
| H                      | -2.159411             | -1.838608    |
| H                      | -1.513421             | -1.832365    |
| S                      | -3.885067             | -1.812232    |
| H                      | -4.634643             | -1.393174    |
| C                      | 4.205240              | -0.795374    |
| C                      | 2.800308              | -0.172093    |
| O                      | 4.492588              | -1.816363    |
| O                      | 4.878488              | -0.189392    |
| H                      | 2.261573              | 0.027837     |
| C                      | 2.976974              | 1.108797     |
| N                      | 2.032437              | -1.203218    |
| H                      | 1.446172              | -1.780498    |
| H                      | 3.587692              | 1.798377     |
| H                      | 3.495161              | 0.901943     |
| S                      | 1.408009              | 1.943464     |
| H                      | 2.769382              | -1.815579    |
| H                      | 1.434883              | -0.793488    |
| H                      | 0.994001              | 2.251822     |
| 28                     |                       |              |
| Dimer 311 of the n...z | type                  |              |
| C                      | -2.972770             | -0.910317    |
| C                      | -3.668262             | 0.447852     |
| N                      | -2.286112             | -0.985783    |
| H                      | -1.575660             | -0.260826    |
| H                      | -1.801556             | -1.873291    |
| H                      | -3.769621             | -1.664908    |
| C                      | -2.083722             | -1.254952    |

| Nov 11, 22 15:56       | dimers_structures.xyz | Page 242/325 |
|------------------------|-----------------------|--------------|
| O                      | -0.939960             | -1.638805    |
| O                      | -2.736182             | -1.104864    |
| H                      | -2.143544             | -1.357896    |
| H                      | -4.298123             | 0.445566     |
| H                      | -4.293079             | 0.635269     |
| S                      | -2.522738             | 1.893536     |
| H                      | -2.101188             | 1.687032     |
| C                      | 2.996828              | -1.136942    |
| C                      | 1.771102              | -0.335982    |
| O                      | 3.868713              | -1.427896    |
| O                      | 2.961178              | -1.418308    |
| H                      | 0.962753              | -1.050096    |
| C                      | 1.257199              | 0.762936     |
| N                      | 2.180309              | 0.199053     |
| H                      | 1.431665              | 0.208131     |
| H                      | 0.370515              | 1.239443     |
| H                      | 0.987544              | 0.310986     |
| S                      | 2.462223              | 2.129158     |
| H                      | 2.959900              | -0.422840    |
| H                      | 2.560125              | 1.147437     |
| H                      | 3.386896              | 1.383428     |
| 28                     |                       |              |
| Dimer 312 of the n...z | type                  |              |
| C                      | 2.135313              | -0.312086    |
| C                      | 1.551923              | 0.847143     |
| N                      | 2.647477              | 0.153989     |
| H                      | 3.451648              | 0.757750     |
| H                      | 2.974662              | -0.630594    |
| H                      | 1.294441              | -0.992566    |
| C                      | 3.153123              | -1.109671    |
| O                      | 4.289715              | -1.345931    |
| O                      | 2.628260              | -1.540732    |
| H                      | 3.304110              | -2.046003    |
| H                      | 1.069899              | 0.470295     |
| H                      | 0.808795              | 1.356632     |
| S                      | 2.764314              | 2.153294     |
| H                      | 3.412973              | 1.441785     |
| C                      | -1.454355             | -0.410436    |
| C                      | -2.181583             | 0.333769     |
| O                      | -0.975923             | -1.533544    |
| O                      | -1.396365             | 0.204890     |
| H                      | -1.473418             | 1.058568     |
| C                      | -3.455460             | 1.063070     |
| N                      | -2.427892             | -0.689034    |
| H                      | -2.334150             | -0.328197    |
| H                      | -3.878635             | 1.613704     |
| H                      | -3.205398             | 1.768548     |
| S                      | -4.799958             | -0.055646    |
| H                      | -1.731679             | -1.434264    |
| H                      | -3.360957             | -1.101995    |
| H                      | -4.158369             | -0.498924    |
| 28                     |                       |              |
| Dimer 313 of the n...z | type                  |              |
| C                      | -3.337181             | 0.633889     |
| C                      | -3.513099             | -0.515773    |
| N                      | -3.551238             | 0.182571     |
| H                      | -2.855824             | -0.517896    |
| H                      | -3.431604             | 0.953032     |
| H                      | -4.108985             | 1.372774     |
| C                      | -2.003689             | 1.358243     |
| O                      | -1.128600             | 1.474587     |
| O                      | -1.926675             | 1.887080     |
| H                      | -1.083300             | 2.357088     |
| H                      | -3.386996             | -0.148103    |
| H                      | -4.524326             | -0.908820    |
| S                      | -2.408043             | -1.967498    |
| H                      | -1.235693             | -1.407013    |
| C                      | 1.218182              | -0.652746    |
| C                      | 1.993756              | 0.684412     |

| Nov 11, 22 15:56 dimers_structures.xyz Page 243/325 |           |           |           |
|-----------------------------------------------------|-----------|-----------|-----------|
| O                                                   | 0.635675  | -0.730694 | 1.221421  |
| O                                                   | 1.223787  | -1.464543 | -0.834744 |
| H                                                   | 1.287349  | 1.359591  | -0.615217 |
| C                                                   | 3.254398  | 0.560853  | -0.969433 |
| N                                                   | 2.277974  | 1.262914  | 1.232889  |
| H                                                   | 2.266050  | 2.282211  | 1.259865  |
| H                                                   | 3.712856  | 1.535601  | -1.140853 |
| H                                                   | 2.981916  | 0.130668  | -1.930001 |
| S                                                   | 4.569167  | -0.472264 | -0.190887 |
| H                                                   | 1.542285  | 0.863455  | 1.843668  |
| H                                                   | 3.186452  | 0.930219  | 1.575467  |
| H                                                   | 3.876968  | -1.629717 | -0.226335 |
| 28                                                  |           |           |           |
| Dimer 314 of the n...z type                         |           |           |           |
| C                                                   | -2.146430 | 0.647754  | -1.004405 |
| C                                                   | -3.327450 | -0.334752 | -0.939424 |
| N                                                   | -0.944041 | 0.010366  | -1.506741 |
| H                                                   | -0.572242 | -0.663528 | -0.838392 |
| H                                                   | -0.214475 | 0.700385  | -1.651607 |
| H                                                   | -2.446155 | 1.429312  | -1.714499 |
| C                                                   | -1.954983 | 1.382003  | 0.329864  |
| O                                                   | -0.898881 | 1.526365  | 0.901995  |
| O                                                   | -3.112955 | 1.883724  | 0.799438  |
| H                                                   | -2.936910 | 2.357429  | 1.628418  |
| H                                                   | -4.255084 | 0.188059  | -0.716660 |
| H                                                   | -3.422760 | -0.818701 | -1.910949 |
| S                                                   | -3.122925 | -1.716324 | 0.266455  |
| H                                                   | -3.340214 | -0.992525 | 1.383786  |
| C                                                   | 1.760733  | -1.291521 | 0.808909  |
| C                                                   | 3.091009  | -0.828039 | 0.123556  |
| O                                                   | 0.967103  | -1.918298 | 0.056328  |
| O                                                   | 1.650917  | -1.013373 | 2.013601  |
| H                                                   | 3.888125  | -1.474414 | 0.494892  |
| C                                                   | 3.461093  | 0.625668  | 0.402552  |
| N                                                   | 2.945294  | -1.101106 | -1.349352 |
| H                                                   | 3.775568  | -1.501788 | -1.783539 |
| H                                                   | 4.453462  | 0.857374  | 0.013729  |
| H                                                   | 3.465052  | 0.771527  | 1.480199  |
| S                                                   | 2.336276  | 1.854498  | -0.386938 |
| H                                                   | 2.134764  | -1.751145 | -1.402801 |
| H                                                   | 2.685757  | -0.240990 | -1.846274 |
| H                                                   | 1.209419  | 1.529403  | 0.286867  |
| 28                                                  |           |           |           |
| Dimer 315 of the n...z type                         |           |           |           |
| C                                                   | 3.564264  | 0.518399  | -0.018757 |
| C                                                   | 3.347937  | -0.654318 | -0.994553 |
| N                                                   | 4.210760  | 0.074253  | 1.204733  |
| H                                                   | 3.608569  | -0.586716 | 1.688634  |
| H                                                   | 4.349336  | 0.857595  | 1.835277  |
| H                                                   | 4.231852  | 1.221735  | -0.529851 |
| C                                                   | 2.253561  | 1.279173  | 0.209311  |
| O                                                   | 1.678605  | 1.379308  | 1.267699  |
| O                                                   | 1.812355  | 1.849796  | -0.928140 |
| H                                                   | 0.965436  | 2.286535  | -0.747125 |
| H                                                   | 2.924930  | -0.293986 | -1.930628 |
| H                                                   | 4.316867  | -1.108010 | -1.201858 |
| S                                                   | 2.290974  | -2.020760 | -0.346404 |
| H                                                   | 1.086334  | -1.396039 | -0.494734 |
| C                                                   | -1.294603 | -0.306996 | 0.220036  |
| C                                                   | -2.319711 | 0.875515  | 0.176631  |
| O                                                   | -0.590140 | -0.423149 | -0.820791 |
| O                                                   | -1.267414 | -0.973525 | 1.265399  |
| H                                                   | -1.851443 | 1.720872  | 0.685776  |
| C                                                   | -3.660658 | 0.574496  | 0.832910  |
| N                                                   | -2.473848 | 1.265630  | -1.268858 |
| H                                                   | -2.601718 | 2.266043  | -1.418322 |
| H                                                   | -4.309756 | 1.451089  | 0.823355  |
| H                                                   | -3.478072 | 0.286448  | 1.865218  |
| S                                                   | -4.615996 | -0.754124 | -0.015300 |

| Nov 11, 22 15:56 dimers_structures.xyz Page 244/325 |           |           |           |
|-----------------------------------------------------|-----------|-----------|-----------|
| H                                                   | -1.606917 | 0.923870  | -1.724243 |
| H                                                   | -3.263582 | 0.760489  | -1.687483 |
| H                                                   | -3.741855 | -1.748002 | 0.245312  |
| 28                                                  |           |           |           |
| Dimer 316 of the n...z type                         |           |           |           |
| C                                                   | 2.159412  | -0.770087 | -0.068587 |
| C                                                   | 2.114083  | 0.511726  | -0.909513 |
| N                                                   | 1.658849  | -0.662779 | 1.304800  |
| H                                                   | 1.826694  | 0.267739  | 1.680063  |
| H                                                   | 0.666052  | -0.853828 | 1.361505  |
| H                                                   | 1.557116  | -1.521368 | -0.591759 |
| C                                                   | 3.578368  | -1.371413 | -0.033516 |
| O                                                   | 4.327305  | -1.384279 | -0.984832 |
| O                                                   | 3.901345  | -1.910525 | 1.141629  |
| H                                                   | 3.119960  | -1.716231 | 1.722852  |
| H                                                   | 2.494767  | 0.320102  | -1.911139 |
| H                                                   | 1.083615  | 0.858028  | -0.983389 |
| S                                                   | 3.031460  | 1.931047  | -0.173880 |
| H                                                   | 4.271886  | 1.437788  | -0.367932 |
| C                                                   | -4.273792 | -0.938745 | 0.021713  |
| C                                                   | -2.845434 | -0.312299 | 0.177689  |
| O                                                   | -4.529139 | -1.391286 | -1.123598 |
| O                                                   | -4.993478 | -0.882974 | 1.033776  |
| H                                                   | -2.370655 | -0.681299 | 1.084375  |
| C                                                   | -2.950370 | 1.212240  | 0.203612  |
| N                                                   | -2.033219 | -0.769557 | -1.004600 |
| H                                                   | -1.508577 | -1.620612 | -0.801461 |
| H                                                   | -3.547599 | 1.499323  | 1.066206  |
| H                                                   | -3.451853 | 1.579623  | -0.694381 |
| S                                                   | -1.333383 | 2.097001  | 0.240411  |
| H                                                   | -2.739316 | -1.001668 | -1.729884 |
| H                                                   | -1.369809 | -0.057120 | -1.322651 |
| H                                                   | -0.922797 | 1.631093  | 1.437517  |
| 28                                                  |           |           |           |
| Dimer 1 of the z...z type                           |           |           |           |
| C                                                   | 0.530028  | 1.668862  | 0.134520  |
| C                                                   | 1.957368  | 1.067280  | 0.296421  |
| O                                                   | -0.200790 | 1.632448  | 1.169871  |
| O                                                   | 0.251790  | 2.131120  | -0.980426 |
| H                                                   | 2.658713  | 1.899597  | 0.382312  |
| C                                                   | 2.338715  | 0.178390  | -0.885099 |
| N                                                   | 2.023015  | 0.293664  | 1.579754  |
| H                                                   | 2.969956  | -0.047006 | 1.757614  |
| H                                                   | 2.250889  | 0.765865  | -1.795382 |
| H                                                   | 1.662984  | -0.674686 | -0.962503 |
| S                                                   | 4.029303  | -0.548593 | -0.765922 |
| H                                                   | 1.711331  | 0.877062  | 2.356586  |
| H                                                   | 1.361384  | -0.525531 | 1.512435  |
| H                                                   | 4.709835  | 0.611811  | -0.866752 |
| C                                                   | -0.530268 | -1.668942 | 0.136022  |
| C                                                   | -1.957364 | -1.066883 | 0.297460  |
| O                                                   | 0.201191  | -1.630510 | 1.170895  |
| O                                                   | -0.252723 | -2.133844 | -0.977999 |
| H                                                   | -2.658927 | -1.898919 | 0.384507  |
| C                                                   | -2.338773 | -0.179170 | -0.884970 |
| N                                                   | -2.022545 | -0.291825 | 1.579901  |
| H                                                   | -1.711974 | -0.874687 | 2.357525  |
| H                                                   | -2.251108 | -0.767683 | -1.794605 |
| H                                                   | -1.662791 | 0.673674  | -0.963223 |
| S                                                   | -4.029183 | 0.548130  | -0.766278 |
| H                                                   | -1.360364 | 0.526665  | 1.511921  |
| H                                                   | -2.969295 | 0.049850  | 1.757080  |
| H                                                   | -4.709809 | -0.612420 | -0.864774 |
| 28                                                  |           |           |           |
| Dimer 2 of the z...z type                           |           |           |           |
| C                                                   | 1.784535  | -0.844415 | 0.700633  |
| C                                                   | 2.206667  | -0.447138 | -0.740482 |
| O                                                   | 1.057240  | -0.014331 | 1.323216  |
| O                                                   | 2.246209  | -1.916590 | 1.112500  |

| Nov 11, 22 15:56 dimers_structures.xyz Page 245/325 |           |           |           |
|-----------------------------------------------------|-----------|-----------|-----------|
| H                                                   | 1.905085  | -1.244798 | -1.421229 |
| C                                                   | 3.720390  | -0.257443 | -0.840848 |
| N                                                   | 1.468585  | 0.785158  | -1.162852 |
| H                                                   | 1.763784  | 1.111020  | -2.083820 |
| H                                                   | 4.015637  | -0.019287 | -1.864142 |
| H                                                   | 4.199443  | -1.190503 | -0.550930 |
| S                                                   | 4.381080  | 1.121781  | 0.192261  |
| H                                                   | 0.434215  | 0.569675  | -1.192972 |
| H                                                   | 1.630048  | 1.532975  | -0.484395 |
| H                                                   | 4.097516  | 0.567210  | 1.388810  |
| C                                                   | -1.784601 | -0.844317 | -0.700762 |
| C                                                   | -2.206723 | -0.447211 | 0.740402  |
| O                                                   | -1.057305 | -0.014161 | -1.323249 |
| O                                                   | -2.246281 | -1.916441 | -1.112757 |
| H                                                   | -1.905134 | -1.244952 | 1.421052  |
| C                                                   | -3.720446 | -0.257533 | 0.840801  |
| N                                                   | -1.468640 | 0.785037  | 1.162910  |
| H                                                   | -1.763844 | 1.110803  | 2.083912  |
| H                                                   | -4.015689 | -0.019513 | 1.864128  |
| H                                                   | -4.199500 | -1.190555 | 0.550763  |
| S                                                   | -4.381143 | 1.121827  | -0.192121 |
| H                                                   | -0.434271 | 0.569545  | 1.193014  |
| H                                                   | -1.630094 | 1.532928  | 0.484534  |
| H                                                   | -4.097572 | 0.567422  | -1.388745 |
| 28                                                  |           |           |           |
| Dimer 3 of the z...z type                           |           |           |           |
| C                                                   | -0.677447 | -0.835422 | -0.555541 |
| C                                                   | -1.943423 | -0.177344 | 0.059582  |
| O                                                   | -0.424157 | -0.547156 | -1.738667 |
| O                                                   | -0.039067 | -1.608985 | 0.212143  |
| H                                                   | -1.815985 | -0.081385 | 1.135794  |
| C                                                   | -3.175770 | -1.011557 | -0.277233 |
| N                                                   | -2.051082 | 1.210402  | -0.491459 |
| H                                                   | -1.248060 | 1.755987  | -0.079113 |
| H                                                   | -3.035571 | -2.020447 | 0.108709  |
| H                                                   | -3.306541 | -1.073787 | -1.359328 |
| S                                                   | -4.755691 | -0.316461 | 0.373373  |
| H                                                   | -1.933349 | 1.179004  | -1.507937 |
| H                                                   | -2.947574 | 1.643775  | -0.259017 |
| H                                                   | -4.451671 | -0.448819 | 1.680623  |
| C                                                   | 1.267567  | 1.780473  | 0.109856  |
| C                                                   | 2.318938  | 0.736933  | 0.587166  |
| O                                                   | 0.190582  | 1.814154  | 0.778631  |
| O                                                   | 1.586559  | 2.470698  | -0.866996 |
| H                                                   | 3.147865  | 1.280036  | 1.044365  |
| C                                                   | 2.820801  | -0.113069 | -0.578703 |
| N                                                   | 1.717457  | -0.135656 | 1.652907  |
| H                                                   | 2.430477  | -0.706877 | 2.109149  |
| H                                                   | 3.246598  | 0.551149  | -1.326488 |
| H                                                   | 1.990473  | -0.657037 | -1.030776 |
| S                                                   | 4.056031  | -1.394802 | -0.099266 |
| H                                                   | 1.238110  | 0.441973  | 2.344289  |
| H                                                   | 0.998855  | -0.773197 | 1.218604  |
| H                                                   | 5.040978  | -0.543162 | 0.253634  |
| 28                                                  |           |           |           |
| Dimer 4 of the z...z type                           |           |           |           |
| C                                                   | 1.169207  | -0.763937 | -0.286567 |
| C                                                   | 2.025578  | 0.512208  | -0.503020 |
| O                                                   | 0.864636  | -1.027956 | 0.915231  |
| O                                                   | 0.871655  | -1.392712 | -1.311826 |
| H                                                   | 1.538285  | 1.113745  | -1.271390 |
| C                                                   | 3.444673  | 0.168124  | -0.950122 |
| N                                                   | 2.021520  | 1.336153  | 0.751504  |
| H                                                   | 2.614907  | 2.162042  | 0.667306  |
| H                                                   | 4.018145  | 1.074221  | -1.152673 |
| H                                                   | 3.378358  | -0.410004 | -1.870358 |
| S                                                   | 4.434321  | -0.762097 | 0.298833  |
| H                                                   | 1.029935  | 1.635269  | 0.953132  |
| H                                                   | 2.349332  | 0.767967  | 1.536144  |

| Nov 11, 22 15:56 dimers_structures.xyz Page 246/325 |           |           |           |
|-----------------------------------------------------|-----------|-----------|-----------|
| H                                                   | 3.665637  | -1.870456 | 0.314318  |
| C                                                   | -1.130562 | 1.368793  | -0.135271 |
| C                                                   | -2.013882 | 0.094595  | -0.034592 |
| O                                                   | -0.635687 | 1.785522  | 0.955331  |
| O                                                   | -0.987389 | 1.838023  | -1.272969 |
| H                                                   | -1.697231 | -0.595897 | -0.816088 |
| C                                                   | -3.487827 | 0.455787  | -0.195742 |
| N                                                   | -1.753980 | -0.588014 | 1.273785  |
| H                                                   | -0.756885 | -0.932589 | 1.269283  |
| H                                                   | -3.612919 | 0.976399  | -1.143322 |
| H                                                   | -3.809589 | 1.121931  | 0.607603  |
| S                                                   | -4.629842 | -0.990059 | -0.121080 |
| H                                                   | -1.839428 | 0.085639  | 2.037850  |
| H                                                   | -2.402988 | -1.364147 | 1.423340  |
| H                                                   | -4.168851 | -1.603047 | -1.230467 |
| 28                                                  |           |           |           |
| Dimer 5 of the z...z type                           |           |           |           |
| C                                                   | 1.278344  | -0.310986 | 0.933931  |
| C                                                   | 2.088404  | -0.682882 | -0.335573 |
| O                                                   | 0.325575  | 0.507293  | 0.762703  |
| O                                                   | 1.656726  | -0.840966 | 1.986978  |
| H                                                   | 2.050281  | -1.767122 | -0.449344 |
| C                                                   | 3.546612  | -0.243350 | -0.218264 |
| N                                                   | 1.433652  | -0.097337 | -1.551422 |
| H                                                   | 0.493204  | -0.555654 | -1.706211 |
| H                                                   | 4.116816  | -0.547428 | -1.097680 |
| H                                                   | 3.977379  | -0.725384 | 0.657196  |
| S                                                   | 3.775683  | 1.583466  | -0.091495 |
| H                                                   | 1.278175  | 0.902835  | -1.407794 |
| H                                                   | 2.003799  | -0.224335 | -2.388464 |
| H                                                   | 3.184001  | 1.727929  | 1.112172  |
| C                                                   | -1.324762 | -1.609157 | -0.556383 |
| C                                                   | -2.407639 | -0.648386 | 0.028167  |
| O                                                   | -0.945054 | -2.517730 | 0.201898  |
| O                                                   | -0.935512 | -1.365232 | -1.733686 |
| H                                                   | -3.368341 | -1.166519 | 0.000219  |
| C                                                   | -2.494970 | 0.682784  | -0.705909 |
| N                                                   | -2.059682 | -0.432273 | 1.473308  |
| H                                                   | -1.955756 | -1.336436 | 1.937150  |
| H                                                   | -2.722315 | 0.490687  | -1.751004 |
| H                                                   | -1.536130 | 1.197741  | -0.653511 |
| S                                                   | -3.735272 | 1.854502  | -0.000522 |
| H                                                   | -1.120917 | 0.050684  | 1.492273  |
| H                                                   | -2.763240 | 0.131127  | 1.953604  |
| H                                                   | -4.831135 | 1.126607  | -0.298498 |
| 28                                                  |           |           |           |
| Dimer 6 of the z...z type                           |           |           |           |
| C                                                   | 1.062653  | 1.632276  | 0.421462  |
| C                                                   | 2.430553  | 0.902083  | 0.548807  |
| O                                                   | 0.318522  | 1.543840  | 1.443925  |
| O                                                   | 0.833920  | 2.228814  | -0.639978 |
| H                                                   | 3.131044  | 1.611889  | 0.998410  |
| C                                                   | 3.019298  | 0.426237  | -0.773198 |
| N                                                   | 2.272946  | -0.224933 | 1.530937  |
| H                                                   | 3.146062  | -0.732091 | 1.675699  |
| H                                                   | 3.982582  | -0.061273 | -0.612270 |
| H                                                   | 3.179192  | 1.300117  | -1.401101 |
| S                                                   | 1.986422  | -0.795628 | -1.682852 |
| H                                                   | 1.960192  | 0.156492  | 2.425387  |
| H                                                   | 1.515068  | -0.902500 | 1.244471  |
| H                                                   | 0.975471  | 0.054607  | -1.945973 |
| C                                                   | -0.751345 | -1.932098 | 0.322019  |
| C                                                   | -1.911615 | -0.898203 | 0.419214  |
| O                                                   | 0.145749  | -1.842055 | 1.210484  |
| O                                                   | -0.841826 | -2.738569 | -0.612927 |
| H                                                   | -2.849108 | -1.452430 | 0.477211  |
| C                                                   | -1.921520 | 0.026452  | -0.796201 |
| N                                                   | -1.785434 | -0.096910 | 1.681286  |
| H                                                   | -1.631837 | -0.714301 | 2.478324  |

| Nov 11, 22 15:56          | dimers_structures.xyz |           | Page 247/325 |
|---------------------------|-----------------------|-----------|--------------|
| H -1.954928               | -0.587610             | -1.693461 |              |
| H -1.021391               | 0.641168              | -0.826480 |              |
| S -3.310200               | 1.239660              | -0.810584 |              |
| H -0.955974               | 0.555366              | 1.620736  |              |
| H -2.622927               | 0.465175              | 1.843049  |              |
| H -4.304643               | 0.337072              | -0.939231 |              |
| 28                        |                       |           |              |
| Dimer 7 of the z...z type |                       |           |              |
| C 0.949153                | -0.956933             | 0.512871  |              |
| C 2.127717                | -0.269580             | -0.225469 |              |
| O 0.542804                | -0.358739             | 1.554609  |              |
| O 0.522115                | -2.012979             | 0.024722  |              |
| H 2.011615                | -0.423326             | -1.296879 |              |
| C 3.454064                | -0.849748             | 0.262058  |              |
| N 2.055148                | 1.206680              | 0.016427  |              |
| H 1.183834                | 1.576992              | -0.449491 |              |
| H 3.447979                | -1.925180             | 0.091149  |              |
| H 3.577154                | -0.672927             | 1.332599  |              |
| S 4.941573                | -0.103957             | -0.532999 |              |
| H 1.956382                | 1.379596              | 1.020222  |              |
| H 2.887937                | 1.685396              | -0.334906 |              |
| H 4.678271                | -0.536267             | -1.783135 |              |
| C -1.213385               | 1.499290              | -0.108747 |              |
| C -2.043828               | 0.184516              | -0.069095 |              |
| O -1.454613               | 2.323919              | 0.790315  |              |
| O -0.376257               | 1.587373              | -1.051168 |              |
| H -1.517966               | -0.604147             | -0.603336 |              |
| C -3.431782               | 0.416226              | -0.655194 |              |
| N -2.120405               | -0.244640             | 1.365551  |              |
| H -1.133006               | -0.462338             | 1.674604  |              |
| H -3.329799               | 0.762828              | -1.683000 |              |
| H -3.958985               | 1.184035              | -0.085726 |              |
| S -4.521598               | -1.072164             | -0.613970 |              |
| H -2.468096               | 0.533542              | 1.931945  |              |
| H -2.730608               | -1.055951             | 1.485491  |              |
| H -3.791554               | -1.817803             | -1.468251 |              |
| 28                        |                       |           |              |
| Dimer 8 of the z...z type |                       |           |              |
| C 1.550327                | 0.568701              | 1.115026  |              |
| C 2.346021                | -0.664181             | 0.606709  |              |
| O 0.437668                | 0.782842              | 0.547322  |              |
| O 2.099738                | 1.225797              | 2.009272  |              |
| H 2.510894                | -1.334664             | 1.451922  |              |
| C 3.701239                | -0.257349             | 0.028835  |              |
| N 1.528950                | -1.419278             | -0.395977 |              |
| H 2.026445                | -2.236156             | -0.752154 |              |
| H 4.266772                | -1.131727             | -0.297644 |              |
| H 4.265141                | 0.248672              | 0.809807  |              |
| S 3.585694                | 0.837199              | -1.453225 |              |
| H 0.607781                | -1.736224             | 0.018187  |              |
| H 1.307780                | -0.807427             | -1.185638 |              |
| H 3.061774                | 1.902985              | -0.813629 |              |
| C -1.846721               | -1.843355             | -0.135081 |              |
| C -2.575954               | -0.530064             | 0.266326  |              |
| O -0.858822               | -2.174764             | 0.588780  |              |
| O -2.298969               | -2.423265             | -1.131526 |              |
| H -3.613341               | -0.769176             | 0.503222  |              |
| C -2.505571               | 0.484043              | -0.875618 |              |
| N -1.944486               | 0.045632              | 1.498187  |              |
| H -1.851451               | -0.668933             | 2.219703  |              |
| H -2.930113               | 0.029073              | -1.767254 |              |
| H -1.464732               | 0.745373              | -1.074765 |              |
| S -3.352132               | 2.083879              | -0.522366 |              |
| H -0.973254               | 0.383677              | 1.252913  |              |
| H -2.488145               | 0.830935              | 1.860073  |              |
| H -4.606747               | 1.590202              | -0.478734 |              |
| 28                        |                       |           |              |
| Dimer 9 of the z...z type |                       |           |              |
| C -1.127110               | -0.853063             | 0.102293  |              |

| Nov 11, 22 15:56           | dimers_structures.xyz |           | Page 248/325 |
|----------------------------|-----------------------|-----------|--------------|
| C -2.105324                | -0.065985             | 1.009242  |              |
| O -0.901335                | -0.336515             | -1.033405 |              |
| O -0.668456                | -1.909223             | 0.562257  |              |
| H -1.765947                | -0.154921             | 2.040902  |              |
| C -3.529399                | -0.616459             | 0.908912  |              |
| N -2.042393                | 1.387572              | 0.650845  |              |
| H -2.709616                | 1.946191              | 1.183271  |              |
| H -4.184017                | -0.114628             | 1.623843  |              |
| H -3.500707                | -1.676400             | 1.159912  |              |
| S -4.342613                | -0.379234             | -0.730184 |              |
| H -1.058513                | 1.734043              | 0.826705  |              |
| H -2.238204                | 1.499596              | -0.347322 |              |
| H -3.398528                | -1.000142             | -1.467179 |              |
| C 1.218406                 | 1.550377              | -0.001075 |              |
| C 1.954415                 | 0.180462              | -0.020500 |              |
| O 1.343568                 | 2.251175              | -1.019937 |              |
| O 0.572979                 | 1.805888              | 1.055334  |              |
| H 1.492530                 | -0.500293             | 0.691804  |              |
| C 3.435459                 | 0.375103              | 0.282983  |              |
| N 1.745739                 | -0.413490             | -1.380888 |              |
| H 0.708603                 | -0.592929             | -1.477195 |              |
| H 3.537761                 | 0.843459              | 1.261306  |              |
| H 3.889384                 | 1.033541              | -0.460232 |              |
| S 4.425236                 | -1.181495             | 0.240943  |              |
| H 2.019950                 | 0.268838              | -2.092614 |              |
| H 2.283885                 | -1.273770             | -1.504207 |              |
| H 3.825314                 | -1.772699             | 1.294032  |              |
| 28                         |                       |           |              |
| Dimer 10 of the z...z type |                       |           |              |
| C 0.930377                 | -1.270077             | -0.045592 |              |
| C 2.032710                 | -0.174851             | -0.066355 |              |
| O 0.467694                 | -1.564910             | 1.097746  |              |
| O 0.610981                 | -1.734481             | -1.148415 |              |
| H 1.769003                 | 0.552147              | -0.834056 |              |
| C 3.395267                 | -0.798957             | -0.356648 |              |
| N 2.031105                 | 0.559417              | 1.240877  |              |
| H 1.133041                 | 1.105127              | 1.313163  |              |
| H 3.329331                 | -1.343308             | -1.296780 |              |
| H 3.671733                 | -1.504266             | 0.429934  |              |
| S 4.780734                 | 0.415924              | -0.433449 |              |
| H 2.040322                 | -0.112195             | 2.011766  |              |
| H 2.837277                 | 1.184721              | 1.315906  |              |
| H 4.336174                 | 1.084254              | -1.517274 |              |
| C -0.930999                | 1.271400              | -0.042595 |              |
| C -2.032685                | 0.175563              | -0.065817 |              |
| O -0.464719                | 1.559951              | 1.100864  |              |
| O -0.615608                | 1.742253              | -1.143822 |              |
| H -1.768953                | -0.548891             | -0.835875 |              |
| C -3.395966                | 0.799444              | -0.353167 |              |
| N -2.029436                | -0.562926             | 1.239101  |              |
| H -1.130416                | -1.107182             | 1.309752  |              |
| H -3.330964                | 1.347220              | -1.291362 |              |
| H -3.672799                | 1.501741              | 0.435989  |              |
| S -4.780355                | -0.416443             | -0.433720 |              |
| H -2.040108                | 0.105961              | 2.012314  |              |
| H -2.834312                | -1.190145             | 1.312049  |              |
| H -4.336092                | -1.079965             | -1.520609 |              |
| 28                         |                       |           |              |
| Dimer 11 of the z...z type |                       |           |              |
| C 0.997443                 | -1.242935             | -0.402620 |              |
| C 2.222384                 | -0.290620             | -0.374129 |              |
| O 0.096580                 | -0.992188             | 0.453641  |              |
| O 1.009501                 | -2.150639             | -1.247106 |              |
| H 2.663765                 | -0.244860             | -1.368432 |              |
| C 3.243574                 | -0.786300             | 0.646927  |              |
| N 1.746545                 | 1.089164              | -0.040104 |              |
| H 1.070759                 | 1.409275              | -0.780428 |              |
| H 3.540057                 | -1.800995             | 0.384404  |              |
| H 2.800632                 | -0.806263             | 1.644630  |              |

| Nov 11, 22 15:56 dimers_structures.xyz Page 249/325 |           |           |           |
|-----------------------------------------------------|-----------|-----------|-----------|
| S                                                   | 4.743956  | 0.276324  | 0.791574  |
| H                                                   | 1.201700  | 1.073940  | 0.826990  |
| H                                                   | 2.525535  | 1.743227  | 0.061028  |
| H                                                   | 5.212145  | 0.047257  | -0.452336 |
| C                                                   | -1.191791 | 1.498634  | -0.639913 |
| C                                                   | -2.432622 | 0.562097  | -0.547200 |
| O                                                   | -0.424925 | 1.283362  | -1.626181 |
| O                                                   | -1.040723 | 2.346011  | 0.254142  |
| H                                                   | -3.225361 | 0.981792  | -1.170124 |
| C                                                   | -2.912930 | 0.376750  | 0.887133  |
| N                                                   | -2.050050 | -0.763970 | -1.137744 |
| H                                                   | -1.631988 | -0.622879 | -2.059223 |
| H                                                   | -3.141617 | 1.351702  | 1.308614  |
| H                                                   | -2.120346 | -0.075840 | 1.484759  |
| S                                                   | -4.372081 | -0.739769 | 1.056928  |
| H                                                   | -1.300587 | -1.170449 | -0.519683 |
| H                                                   | -2.846846 | -1.398987 | -1.202686 |
| H                                                   | -5.253132 | 0.053721  | 0.414229  |
| 28                                                  |           |           |           |
| Dimer 12 of the z...z type                          |           |           |           |
| C                                                   | 1.557567  | 1.792990  | 0.559417  |
| C                                                   | 2.573927  | 0.617165  | 0.518294  |
| O                                                   | 0.506386  | 1.596814  | 1.242289  |
| O                                                   | 1.869817  | 2.794680  | -0.098698 |
| H                                                   | 3.509793  | 0.953460  | 0.966492  |
| C                                                   | 2.802865  | 0.165085  | -0.924039 |
| N                                                   | 2.060238  | -0.531373 | 1.333950  |
| H                                                   | 1.763176  | -0.209885 | 2.255100  |
| H                                                   | 3.123557  | 1.023880  | -1.508397 |
| H                                                   | 1.871078  | -0.217972 | -1.345001 |
| S                                                   | 4.022326  | -1.207361 | -1.102813 |
| H                                                   | 1.211643  | -0.939913 | 0.850413  |
| H                                                   | 2.769321  | -1.259451 | 1.435857  |
| H                                                   | 5.104445  | -0.506395 | -0.706213 |
| C                                                   | -1.182686 | -1.378463 | 0.553596  |
| C                                                   | -2.216206 | -0.239723 | 0.330346  |
| O                                                   | -0.090365 | -1.264288 | -0.082684 |
| O                                                   | -1.536174 | -2.282131 | 1.321907  |
| H                                                   | -2.555787 | 0.110176  | 1.305130  |
| C                                                   | -3.400916 | -0.750411 | -0.487884 |
| N                                                   | -1.548016 | 0.918417  | -0.340390 |
| H                                                   | -0.795449 | 1.310962  | 0.291191  |
| H                                                   | -3.823790 | -1.614045 | 0.021603  |
| H                                                   | -3.074282 | -1.064770 | -1.481721 |
| S                                                   | -4.716630 | 0.508399  | -0.780691 |
| H                                                   | -1.073585 | 0.598985  | -1.187638 |
| H                                                   | -2.222975 | 1.646612  | -0.585484 |
| H                                                   | -5.088446 | 0.641964  | 0.508913  |
| 28                                                  |           |           |           |
| Dimer 13 of the z...z type                          |           |           |           |
| C                                                   | 2.293215  | 0.611617  | 1.324520  |
| C                                                   | 2.957951  | -0.456789 | 0.413265  |
| O                                                   | 1.177551  | 0.290665  | 1.833594  |
| O                                                   | 2.919077  | 1.673514  | 1.441239  |
| H                                                   | 3.892784  | -0.767921 | 0.885004  |
| C                                                   | 3.278743  | 0.087628  | -0.976045 |
| N                                                   | 2.086767  | -1.676980 | 0.336465  |
| H                                                   | 2.560536  | -2.451131 | -0.130579 |
| H                                                   | 3.600643  | -0.711188 | -1.645808 |
| H                                                   | 4.094572  | 0.800452  | -0.881392 |
| S                                                   | 1.875718  | 0.936184  | -1.827677 |
| H                                                   | 1.838316  | -1.976528 | 1.280818  |
| H                                                   | 1.162843  | -1.524426 | -0.149731 |
| H                                                   | 1.913383  | 2.047834  | -1.063804 |
| C                                                   | -1.473083 | -1.763793 | -0.083843 |
| C                                                   | -2.017068 | -0.380702 | 0.376436  |
| O                                                   | -0.378205 | -1.745479 | -0.720464 |
| O                                                   | -2.192141 | -2.736021 | 0.185058  |
| H                                                   | -2.268691 | -0.434321 | 1.435402  |

| Nov 11, 22 15:56 dimers_structures.xyz Page 250/325 |           |           |           |
|-----------------------------------------------------|-----------|-----------|-----------|
| C                                                   | -3.258198 | -0.020857 | -0.441823 |
| N                                                   | -0.956015 | 0.659296  | 0.221267  |
| H                                                   | -0.183223 | 0.536598  | 0.925703  |
| H                                                   | -3.990787 | -0.816223 | -0.322660 |
| H                                                   | -3.007056 | 0.059368  | -1.501869 |
| S                                                   | -4.014634 | 1.601444  | 0.002302  |
| H                                                   | -0.499951 | 0.565333  | -0.694157 |
| H                                                   | -1.346249 | 1.601167  | 0.311411  |
| H                                                   | -4.359347 | 1.268664  | 1.263066  |
| 28                                                  |           |           |           |
| Dimer 14 of the z...z type                          |           |           |           |
| C                                                   | 1.482743  | -1.559222 | 0.193762  |
| C                                                   | 2.625679  | -0.926219 | -0.654555 |
| O                                                   | 0.435086  | -1.833325 | -0.469796 |
| O                                                   | 1.704372  | -1.772515 | 1.390798  |
| H                                                   | 3.183717  | -1.765416 | -1.079335 |
| C                                                   | 3.608855  | -0.062754 | 0.126845  |
| N                                                   | 2.012550  | -0.196702 | -1.820549 |
| H                                                   | 2.718917  | 0.226199  | -2.423402 |
| H                                                   | 4.509623  | 0.116201  | -0.462470 |
| H                                                   | 3.885007  | -0.625016 | 1.016867  |
| S                                                   | 3.010168  | 1.613819  | 0.603236  |
| H                                                   | 1.458302  | -0.857885 | -2.367268 |
| H                                                   | 1.332672  | 0.543931  | -1.511476 |
| H                                                   | 1.756736  | 1.272501  | 1.004564  |
| C                                                   | -0.643528 | 0.911483  | -0.061999 |
| C                                                   | -1.932158 | 0.062385  | -0.234744 |
| O                                                   | -0.246469 | 1.046146  | 1.115459  |
| O                                                   | -0.128807 | 1.367462  | -1.114862 |
| H                                                   | -1.971339 | -0.339677 | -1.245250 |
| C                                                   | -3.166886 | 0.902960  | 0.073665  |
| N                                                   | -1.813888 | -1.104792 | 0.696363  |
| H                                                   | -0.967917 | -1.659877 | 0.372659  |
| H                                                   | -3.195588 | 1.755366  | -0.604219 |
| H                                                   | -3.117639 | 1.281314  | 1.096560  |
| S                                                   | -4.757726 | -0.024319 | -0.037029 |
| H                                                   | -1.620325 | -0.764219 | 1.641675  |
| H                                                   | -2.661874 | -1.674929 | 0.703424  |
| H                                                   | -4.701689 | -0.263987 | -1.362994 |
| 28                                                  |           |           |           |
| Dimer 15 of the z...z type                          |           |           |           |
| C                                                   | -1.254991 | 0.873123  | -0.334329 |
| C                                                   | -1.865395 | -0.496214 | -0.752325 |
| O                                                   | -0.746430 | 0.924984  | 0.816413  |
| O                                                   | -1.366485 | 1.779477  | -1.179776 |
| H                                                   | -1.516205 | -0.744142 | -1.755426 |
| C                                                   | -3.392629 | -0.426457 | -0.769504 |
| N                                                   | -1.364833 | -1.563602 | 0.168266  |
| H                                                   | -0.353129 | -1.795975 | -0.074571 |
| H                                                   | -3.820757 | -1.364804 | -1.127382 |
| H                                                   | -3.686610 | 0.368474  | -1.453137 |
| S                                                   | -4.165922 | -0.146286 | 0.882404  |
| H                                                   | -1.391117 | -1.205639 | 1.126845  |
| H                                                   | -1.919334 | -2.418031 | 0.114428  |
| H                                                   | -3.569436 | 1.036472  | 1.137179  |
| C                                                   | 2.211296  | -1.737066 | -0.213836 |
| C                                                   | 2.151127  | -0.320171 | 0.414569  |
| O                                                   | 3.336365  | -2.256263 | -0.317165 |
| O                                                   | 1.101896  | -2.194972 | -0.603582 |
| H                                                   | 1.282167  | -0.210983 | 1.059435  |
| C                                                   | 2.105337  | 0.733599  | -0.694198 |
| N                                                   | 3.382351  | -0.119452 | 1.255823  |
| H                                                   | 3.300854  | -0.586089 | 2.159828  |
| H                                                   | 1.221673  | 0.556292  | -1.304064 |
| H                                                   | 2.985717  | 0.655095  | -1.335117 |
| S                                                   | 2.068573  | 2.461255  | -0.059633 |
| H                                                   | 4.180540  | -0.543175 | 0.766334  |
| H                                                   | 3.548276  | 0.880430  | 1.420820  |
| H                                                   | 0.841075  | 2.327260  | 0.502487  |

| Nov 11, 22 15:56           | dimers_structures.xyz | Page 251/325        |
|----------------------------|-----------------------|---------------------|
| 28                         |                       |                     |
| Dimer 16 of the z...z type |                       |                     |
| C                          | -1.260857             | 0.898511 -0.252013  |
| C                          | -1.840057             | -0.461292 -0.740612 |
| O                          | -0.732423             | 0.900921 0.890416   |
| O                          | -1.409301             | 1.846678 -1.044560  |
| H                          | -1.455323             | -0.665585 -1.740735 |
| C                          | -3.366320             | -0.411260 -0.806379 |
| N                          | -1.355486             | -1.559304 0.152877  |
| H                          | -0.341399             | -1.790743 -0.081047 |
| H                          | -3.769072             | -1.341550 -1.211450 |
| H                          | -3.649396             | 0.404447 -1.469490  |
| S                          | -4.194796             | -0.200157 0.828478  |
| H                          | -1.394616             | -1.232820 1.122081  |
| H                          | -1.912239             | -2.409306 0.062985  |
| H                          | -3.667082             | 1.006938 1.118507   |
| C                          | 2.224295              | -1.741044 -0.208582 |
| C                          | 2.161644              | -0.319232 0.408370  |
| O                          | 3.350007              | -2.259060 -0.310362 |
| O                          | 1.114941              | -2.203906 -0.592481 |
| H                          | 1.301813              | -0.212166 1.065880  |
| C                          | 2.086333              | 0.722559 -0.710291  |
| N                          | 3.403872              | -0.099945 1.228056  |
| H                          | 3.338118              | -0.555138 2.139247  |
| H                          | 1.190216              | 0.532906 -1.298035  |
| H                          | 2.951630              | 0.640499 -1.371099  |
| S                          | 2.059729              | 2.457736 -0.097351  |
| H                          | 4.197283              | -0.526088 0.732905  |
| H                          | 3.566621              | 0.903008 1.377170   |
| H                          | 0.849799              | 2.332551 0.501457   |
| 28                         |                       |                     |
| Dimer 17 of the z...z type |                       |                     |
| C                          | 1.876896              | 1.935511 0.158696   |
| C                          | 2.146970              | 0.459515 -0.236867  |
| O                          | 2.871621              | 2.657830 0.345639   |
| O                          | 0.659577              | 2.235051 0.301954   |
| H                          | 1.475368              | 0.136244 -1.029930  |
| C                          | 1.985715              | -0.433506 0.997579  |
| N                          | 3.552983              | 0.356428 -0.762842  |
| H                          | 3.620379              | 0.717292 -1.715179  |
| H                          | 0.958450              | -0.352041 1.349148  |
| H                          | 2.644596              | -0.091994 1.798364  |
| S                          | 2.390021              | -2.208168 0.714524  |
| H                          | 4.167620              | 0.935190 -0.178418  |
| H                          | 3.870749              | -0.619518 -0.763510 |
| H                          | 1.210392              | -2.515565 0.113225  |
| C                          | -0.900505             | -1.205487 -0.709089 |
| C                          | -1.822186             | -0.144037 -0.037925 |
| O                          | -0.368518             | -0.876063 -1.794290 |
| O                          | -0.798596             | -2.282610 -0.081087 |
| H                          | -1.553793             | -0.052692 1.014377  |
| C                          | -3.282360             | -0.574047 -0.170769 |
| N                          | -1.581892             | 1.185955 -0.673895  |
| H                          | -0.660290             | 1.592332 -0.328967  |
| H                          | -3.393242             | -1.560293 0.275478  |
| H                          | -3.566805             | -0.638535 -1.223133 |
| S                          | -4.490170             | 0.595839 0.588250   |
| H                          | -1.504926             | 1.059013 -1.686555  |
| H                          | -2.337512             | 1.841600 -0.459733  |
| H                          | -4.066075             | 0.448185 1.860141   |
| 28                         |                       |                     |
| Dimer 18 of the z...z type |                       |                     |
| C                          | 0.508626              | 1.877653 -0.285686  |
| C                          | 1.834015              | 1.181039 0.168927   |
| O                          | -0.237381             | 2.257124 0.653270   |
| O                          | 0.327887              | 1.985478 -1.513037  |
| H                          | 2.587184              | 1.964929 0.274803   |
| C                          | 2.320893              | 0.113527 -0.802254  |
| N                          | 1.605086              | 0.595715 1.530971   |

| Nov 11, 22 15:56           | dimers_structures.xyz | Page 252/325        |
|----------------------------|-----------------------|---------------------|
| H                          | 1.083550              | 1.276332 2.089067   |
| H                          | 2.433960              | 0.562599 -1.785216  |
| H                          | 1.596557              | -0.697683 -0.875696 |
| S                          | 3.896235              | -0.701988 -0.291893 |
| H                          | 1.014892              | -0.279104 1.432993  |
| H                          | 2.480625              | 0.350697 1.993805   |
| H                          | 4.682700              | 0.386518 -0.419225  |
| C                          | -0.689894             | -2.026183 0.340592  |
| C                          | -1.472623             | -0.844593 -0.292795 |
| O                          | -1.103271             | -3.171939 0.094025  |
| O                          | 0.274499              | -1.685728 1.078405  |
| H                          | -0.793245             | -0.135086 -0.759526 |
| C                          | -2.318257             | -0.145188 0.773240  |
| N                          | -2.354755             | -1.377171 -1.389755 |
| H                          | -1.814149             | -1.594437 -2.228011 |
| H                          | -1.647311             | 0.221211 1.546674   |
| H                          | -3.025857             | -0.845688 1.220832  |
| S                          | -3.300373             | 1.271627 0.125242   |
| H                          | -2.785235             | -2.254795 -1.077214 |
| H                          | -3.076111             | -0.690772 -1.639133 |
| H                          | -2.214118             | 2.074245 -0.009711  |
| 28                         |                       |                     |
| Dimer 19 of the z...z type |                       |                     |
| C                          | 1.163191              | 0.684012 0.549316   |
| C                          | 1.855600              | -0.696515 0.385935  |
| O                          | 0.670086              | 1.184458 -0.496059  |
| O                          | 1.194668              | 1.158459 1.701148   |
| H                          | 1.373163              | -1.389205 1.074595  |
| C                          | 3.348464              | -0.622843 0.694056  |
| N                          | 1.600562              | -1.219542 -0.993670 |
| H                          | 0.551807              | -1.364780 -1.139601 |
| H                          | 3.817462              | -1.604299 0.602363  |
| H                          | 3.467723              | -0.277998 1.719409  |
| S                          | 4.309179              | 0.479763 -0.434905  |
| H                          | 1.912199              | -0.530322 -1.680820 |
| H                          | 2.089098              | -2.098593 -1.164404 |
| H                          | 3.711200              | 1.632061 -0.068855  |
| C                          | -1.568068             | -1.334845 -0.139614 |
| C                          | -3.034825             | -0.825775 -0.139851 |
| O                          | -1.057553             | -1.595246 0.967924  |
| O                          | -1.049781             | -1.446884 -1.280087 |
| H                          | -3.660366             | -1.635134 -0.519951 |
| C                          | -3.249491             | 0.424437 -0.993511  |
| N                          | -3.431600             | -0.582494 1.290293  |
| H                          | -4.415005             | -0.774449 1.480349  |
| H                          | -4.313158             | 0.646688 -1.086148  |
| H                          | -2.844794             | 0.225641 -1.983310  |
| S                          | -2.482789             | 1.946148 -0.288723  |
| H                          | -2.817787             | -1.169587 1.874442  |
| H                          | -3.227984             | 0.399083 1.527798   |
| H                          | -1.169578             | 1.571211 -0.395787  |
| 28                         |                       |                     |
| Dimer 20 of the z...z type |                       |                     |
| C                          | -1.781512             | 1.964145 -0.286069  |
| C                          | -2.149542             | 0.578089 0.308049   |
| O                          | -2.728855             | 2.721287 -0.560893  |
| O                          | -0.549110             | 2.155090 -0.477226  |
| H                          | -1.441757             | 0.270648 1.074633   |
| C                          | -2.184651             | -0.466439 -0.810025 |
| N                          | -3.507326             | 0.684229 0.947891   |
| H                          | -3.456233             | 1.128285 1.865448   |
| H                          | -1.201367             | -0.511570 -1.274793 |
| H                          | -2.913212             | -0.185466 -1.573210 |
| S                          | -2.655582             | -2.147548 -0.227054 |
| H                          | -4.096344             | 1.280670 0.353148   |
| H                          | -3.930374             | -0.244602 1.060056  |
| H                          | -1.534408             | -2.308105 0.518557  |
| C                          | 0.935279              | -1.366576 0.090777  |
| C                          | 1.907720              | -0.172698 -0.149858 |

| Nov 11, 22 15:56 dimers_structures.xyz Page 253/325 |           |           |           |
|-----------------------------------------------------|-----------|-----------|-----------|
| O                                                   | 0.276449  | -1.331425 | 1.163570  |
| O                                                   | 0.932683  | -2.236290 | -0.798829 |
| H                                                   | 1.817105  | 0.160686  | -1.183170 |
| C                                                   | 3.338606  | -0.625189 | 0.138649  |
| N                                                   | 1.509753  | 0.972099  | 0.723851  |
| H                                                   | 0.657639  | 1.455766  | 0.306049  |
| H                                                   | 3.569941  | -1.472151 | -0.504411 |
| H                                                   | 3.434817  | -0.945867 | 1.178312  |
| S                                                   | 4.611455  | 0.692257  | -0.081843 |
| H                                                   | 1.249008  | 0.604751  | 1.643510  |
| H                                                   | 2.269802  | 1.650415  | 0.819047  |
| H                                                   | 4.419690  | 0.869600  | -1.405142 |
| 28                                                  |           |           |           |
| Dimer 21 of the z...z type                          |           |           |           |
| C                                                   | -0.937372 | 1.368891  | 0.103222  |
| C                                                   | -1.906610 | 0.174049  | -0.145865 |
| O                                                   | -0.273930 | 1.325528  | 1.172801  |
| O                                                   | -0.941591 | 2.247535  | -0.777603 |
| H                                                   | -1.812779 | -0.153537 | -1.180787 |
| C                                                   | -3.339355 | 0.621764  | 0.141101  |
| N                                                   | -1.508637 | -0.974752 | 0.722576  |
| H                                                   | -0.655319 | -1.456290 | 0.304600  |
| H                                                   | -3.570287 | 1.472243  | -0.497395 |
| H                                                   | -3.439543 | 0.935799  | 1.182428  |
| S                                                   | -4.608657 | -0.696952 | -0.091517 |
| H                                                   | -1.249692 | -0.612073 | 1.644565  |
| H                                                   | -2.268178 | -1.654314 | 0.812947  |
| H                                                   | -4.411659 | -0.866387 | -1.415073 |
| C                                                   | 1.784906  | -1.965084 | -0.282405 |
| C                                                   | 2.151210  | -0.576427 | 0.306586  |
| O                                                   | 2.732868  | -2.722699 | -0.553667 |
| O                                                   | 0.552739  | -2.157568 | -0.473646 |
| H                                                   | 1.444855  | -0.268771 | 1.074420  |
| C                                                   | 2.179632  | 0.464975  | -0.814628 |
| N                                                   | 3.511190  | -0.676648 | 0.942639  |
| H                                                   | 3.464093  | -1.117570 | 1.861923  |
| H                                                   | 1.194327  | 0.506287  | -1.275436 |
| H                                                   | 2.905466  | 0.183352  | -1.580192 |
| S                                                   | 2.649991  | 2.148758  | -0.239084 |
| H                                                   | 4.100240  | -1.273484 | 0.348408  |
| H                                                   | 3.931803  | 0.253849  | 1.050261  |
| H                                                   | 1.532313  | 2.310411  | 0.511292  |
| 28                                                  |           |           |           |
| Dimer 22 of the z...z type                          |           |           |           |
| C                                                   | 1.653368  | -1.333730 | -0.384011 |
| C                                                   | 1.652223  | 0.200955  | -0.662148 |
| O                                                   | 0.533481  | -1.791191 | -0.000911 |
| O                                                   | 2.702581  | -1.956685 | -0.591226 |
| H                                                   | 1.128795  | 0.333996  | -1.611855 |
| C                                                   | 3.028487  | 0.845132  | -0.760327 |
| N                                                   | 0.796190  | 0.892320  | 0.362500  |
| H                                                   | 0.200986  | 1.598410  | -0.093047 |
| H                                                   | 2.943290  | 1.895768  | -1.042317 |
| S                                                   | 3.596455  | 0.321760  | -1.526156 |
| H                                                   | 3.979757  | 0.826948  | 0.820000  |
| H                                                   | 0.142535  | 0.216724  | 0.792333  |
| H                                                   | 1.368694  | 1.297578  | 1.108181  |
| H                                                   | 4.035682  | -0.517610 | 0.912814  |
| C                                                   | -2.335905 | 1.150001  | -0.820960 |
| C                                                   | -2.818496 | -0.328622 | -0.748421 |
| O                                                   | -1.218498 | 1.341443  | -1.375762 |
| O                                                   | -3.101239 | 1.978570  | -0.301332 |
| H                                                   | -3.694832 | -0.424957 | -1.393296 |
| C                                                   | -3.211510 | -0.746797 | 0.665943  |
| N                                                   | -1.766367 | -1.240260 | -1.313808 |
| H                                                   | -2.142550 | -2.165646 | -1.523087 |
| H                                                   | -3.367466 | -1.824847 | 0.726957  |
| H                                                   | -4.144427 | -0.251617 | 0.924101  |
| S                                                   | -1.969898 | -0.334846 | 1.972211  |

| Nov 11, 22 15:56 dimers_structures.xyz Page 254/325 |           |           |           |
|-----------------------------------------------------|-----------|-----------|-----------|
| H                                                   | -1.405933 | -0.831633 | -2.178745 |
| H                                                   | -0.921014 | -1.372012 | -0.688566 |
| H                                                   | -2.228661 | 0.989217  | 1.978898  |
| 28                                                  |           |           |           |
| Dimer 23 of the z...z type                          |           |           |           |
| C                                                   | -1.186871 | 0.840402  | 0.217784  |
| C                                                   | -1.775277 | -0.228929 | -0.746000 |
| O                                                   | -0.797177 | 0.432427  | 1.336008  |
| O                                                   | -1.180290 | 2.006524  | -0.235699 |
| H                                                   | -1.285222 | -0.136572 | -1.716680 |
| C                                                   | -3.278512 | -0.030332 | -0.943153 |
| N                                                   | -1.457693 | -1.591717 | -0.217472 |
| H                                                   | -0.415491 | -1.791981 | -0.312881 |
| H                                                   | -3.674615 | -0.750396 | -1.661575 |
| H                                                   | -3.438738 | 0.972067  | -1.336490 |
| S                                                   | -4.288337 | -0.266599 | 0.582410  |
| H                                                   | -1.692710 | -1.624716 | 0.777451  |
| H                                                   | -1.973410 | -2.324267 | -0.705029 |
| H                                                   | -3.764001 | 0.762679  | 1.278943  |
| C                                                   | 2.194200  | -1.764796 | -0.147853 |
| C                                                   | 2.138626  | -0.306110 | 0.374136  |
| O                                                   | 3.299584  | -2.333320 | -0.119902 |
| O                                                   | 1.101770  | -2.209217 | -0.597746 |
| H                                                   | 1.272488  | -0.157746 | 1.015867  |
| C                                                   | 2.089481  | 0.659905  | -0.813199 |
| N                                                   | 3.367381  | -0.043155 | 1.201845  |
| H                                                   | 3.304596  | -0.501116 | 2.111989  |
| H                                                   | 1.189519  | 0.448785  | -1.388233 |
| H                                                   | 2.949869  | 0.501261  | -1.466511 |
| S                                                   | 2.113057  | 2.442846  | -0.349921 |
| H                                                   | 4.185398  | -0.439606 | 0.725796  |
| H                                                   | 3.495468  | 0.963774  | 1.353459  |
| H                                                   | 0.802526  | 2.509814  | 0.001893  |
| 28                                                  |           |           |           |
| Dimer 24 of the z...z type                          |           |           |           |
| C                                                   | 1.515773  | 1.472560  | -0.211910 |
| C                                                   | 2.989456  | 1.115537  | 0.122560  |
| O                                                   | 0.750309  | 1.621081  | 0.791585  |
| O                                                   | 1.230739  | 1.598475  | -1.408907 |
| C                                                   | 3.585826  | 2.011630  | -0.057262 |
| C                                                   | 3.540793  | -0.036808 | -0.716709 |
| N                                                   | 3.080352  | 0.808109  | 1.592763  |
| H                                                   | 3.980581  | 1.054597  | 2.003269  |
| H                                                   | 4.617802  | -0.132996 | -0.575109 |
| H                                                   | 3.342154  | 0.189118  | -1.762187 |
| S                                                   | 2.834361  | -1.682281 | -0.276079 |
| H                                                   | 2.312635  | 1.310336  | 2.059182  |
| H                                                   | 2.915432  | -0.199795 | 1.729374  |
| H                                                   | 1.533221  | -1.441641 | -0.626590 |
| C                                                   | -0.978200 | -1.329254 | 0.147878  |
| C                                                   | -2.030627 | -0.196627 | 0.348589  |
| O                                                   | -0.333900 | -1.272670 | -0.933386 |
| O                                                   | -0.916151 | -2.181050 | 1.052905  |
| H                                                   | -2.093619 | 0.059833  | 1.405218  |
| C                                                   | -3.385720 | -0.676669 | -0.167500 |
| N                                                   | -1.570443 | 1.019726  | -0.384588 |
| H                                                   | -0.750407 | 1.447911  | 0.129262  |
| H                                                   | -3.661713 | -1.586566 | 0.363052  |
| H                                                   | -3.324849 | -0.903927 | -1.233853 |
| S                                                   | -4.742815 | 0.564420  | -0.010345 |
| H                                                   | -1.186519 | 0.738565  | -1.293810 |
| H                                                   | -2.321417 | 1.701903  | -0.507148 |
| H                                                   | -4.740059 | 0.622831  | 1.337144  |
| 28                                                  |           |           |           |
| Dimer 25 of the z...z type                          |           |           |           |
| C                                                   | 1.578701  | -1.405293 | 0.285170  |
| C                                                   | 3.011601  | -0.814758 | 0.197897  |
| O                                                   | 1.038814  | -1.698522 | -0.827263 |
| O                                                   | 1.109980  | -1.557401 | 1.419701  |



| Nov 11, 22 15:56 dimers_structures.xyz Page 255/325 |           |           |           |
|-----------------------------------------------------|-----------|-----------|-----------|
| H                                                   | 3.697830  | -1.589426 | 0.544017  |
| C                                                   | 3.201928  | 0.444482  | 1.044824  |
| N                                                   | 3.333362  | -0.548472 | -1.248309 |
| H                                                   | 4.323269  | -0.657734 | -1.469409 |
| H                                                   | 4.259034  | 0.702698  | 1.115653  |
| H                                                   | 2.824799  | 0.231790  | 2.042926  |
| S                                                   | 2.371443  | 1.939289  | 0.354400  |
| H                                                   | 2.757157  | -1.184067 | -1.816055 |
| H                                                   | 3.046110  | 0.415325  | -1.475834 |
| H                                                   | 1.073520  | 1.503349  | 0.444845  |
| C                                                   | -1.213952 | 0.865409  | -0.714735 |
| C                                                   | -2.054089 | -0.422437 | -0.953207 |
| O                                                   | -0.705500 | 0.968508  | 0.434659  |
| O                                                   | -1.176325 | 1.672722  | -1.660652 |
| H                                                   | -1.933321 | -0.738489 | -1.989506 |
| C                                                   | -3.539960 | -0.161391 | -0.695152 |
| N                                                   | -1.518163 | -1.515196 | -0.086789 |
| H                                                   | -2.130830 | -2.328632 | -0.042142 |
| H                                                   | -4.135455 | -1.037235 | -0.960494 |
| H                                                   | -3.852852 | 0.667602  | -1.329466 |
| S                                                   | -3.978438 | 0.192591  | 1.062897  |
| H                                                   | -0.554635 | -1.787357 | -0.435007 |
| H                                                   | -1.357781 | -1.151934 | 0.858502  |
| H                                                   | -3.069742 | 1.171028  | 1.257731  |
| 28                                                  |           |           |           |
| Dimer 26 of the z...z type                          |           |           |           |
| C                                                   | 1.222057  | -1.059108 | 0.607197  |
| C                                                   | 2.766454  | -1.079891 | 0.743071  |
| O                                                   | 0.750000  | -1.663867 | -0.398112 |
| O                                                   | 0.615681  | -0.432982 | 1.489926  |
| H                                                   | 3.024280  | -1.620389 | 1.654559  |
| C                                                   | 3.346364  | 0.333858  | 0.805855  |
| N                                                   | 3.352962  | -1.846642 | -0.413799 |
| H                                                   | 4.271680  | -2.239743 | -0.205067 |
| H                                                   | 4.421807  | 0.309500  | 0.985653  |
| H                                                   | 2.863236  | 0.857260  | 1.628074  |
| S                                                   | 3.131584  | 1.287927  | -0.759552 |
| H                                                   | 2.701999  | -2.590245 | -0.685961 |
| H                                                   | 3.439882  | -1.219969 | -1.224646 |
| H                                                   | 1.780782  | 1.313603  | -0.754001 |
| C                                                   | -3.697045 | -0.696593 | 0.092457  |
| C                                                   | -2.271928 | -0.057202 | 0.027059  |
| O                                                   | -3.994987 | -1.469319 | -0.855228 |
| O                                                   | -4.378922 | -0.375098 | 1.085674  |
| H                                                   | -1.692026 | -0.414386 | 0.877744  |
| C                                                   | -2.346532 | 1.464305  | 0.065473  |
| N                                                   | -1.579463 | -0.561428 | -1.204603 |
| H                                                   | -0.691421 | -1.069255 | -0.945203 |
| H                                                   | -2.866718 | 1.753517  | 0.975561  |
| H                                                   | -2.909631 | 1.849743  | -0.787743 |
| S                                                   | -0.700405 | 2.305842  | -0.006039 |
| H                                                   | -2.261232 | -1.200915 | -1.647135 |
| H                                                   | -1.338025 | 0.185294  | -1.855723 |
| H                                                   | -0.108378 | 1.540087  | 0.937418  |
| 28                                                  |           |           |           |
| Dimer 27 of the z...z type                          |           |           |           |
| C                                                   | -1.338553 | 0.895831  | 1.080615  |
| C                                                   | -2.798154 | 0.725330  | 0.588688  |
| O                                                   | -0.710581 | 1.897028  | 0.674532  |
| O                                                   | -0.927168 | -0.006410 | 1.853484  |
| H                                                   | -3.456818 | 0.942559  | 1.431609  |
| C                                                   | -3.107876 | -0.673141 | 0.053159  |
| N                                                   | -3.051126 | 1.776998  | -0.457376 |
| H                                                   | -4.023983 | 2.080171  | -0.501933 |
| H                                                   | -4.174741 | -0.773875 | -0.148420 |
| H                                                   | -2.826336 | -1.395753 | 0.815785  |
| S                                                   | -2.255457 | -1.076442 | -1.532947 |
| H                                                   | -2.427304 | 2.569709  | -0.252636 |
| H                                                   | -2.771808 | 1.410822  | -1.377184 |

| Nov 11, 22 15:56 dimers_structures.xyz Page 256/325 |           |           |           |
|-----------------------------------------------------|-----------|-----------|-----------|
| H                                                   | -1.032281 | -1.421719 | -1.036692 |
| C                                                   | 1.344373  | -1.830308 | 0.239120  |
| C                                                   | 1.608432  | -0.304642 | 0.087452  |
| O                                                   | 1.868719  | -2.377756 | 1.233955  |
| O                                                   | 0.661048  | -2.347358 | -0.676630 |
| H                                                   | 0.764404  | 0.175441  | -0.402532 |
| C                                                   | 2.884010  | -0.077415 | -0.717545 |
| N                                                   | 1.706080  | 0.290259  | 1.454699  |
| H                                                   | 0.737033  | 0.238562  | 1.872253  |
| H                                                   | 2.777382  | -0.561890 | -1.687171 |
| H                                                   | 3.744606  | -0.514883 | -0.207471 |
| S                                                   | 3.308745  | 1.702553  | -0.962552 |
| H                                                   | 2.351044  | -0.265780 | 2.021055  |
| H                                                   | 2.005598  | 1.266432  | 1.418739  |
| H                                                   | 2.206386  | 2.023663  | -1.670321 |
| 28                                                  |           |           |           |
| Dimer 28 of the z...z type                          |           |           |           |
| C                                                   | -0.551869 | 1.862251  | -0.076682 |
| C                                                   | -1.900989 | 1.081988  | -0.223398 |
| O                                                   | -0.063344 | 2.275789  | -1.152162 |
| O                                                   | -0.106033 | 1.996783  | 1.085129  |
| H                                                   | -2.697712 | 1.828686  | -0.250770 |
| C                                                   | -2.166151 | 0.071083  | 0.883288  |
| N                                                   | -1.880482 | 0.401978  | -1.559938 |
| H                                                   | -1.563488 | 1.074217  | -2.262358 |
| H                                                   | -2.084004 | 0.572218  | 1.843881  |
| H                                                   | -1.433101 | -0.734537 | 0.849340  |
| S                                                   | -3.800985 | -0.776075 | 0.743857  |
| H                                                   | -1.180283 | -0.387171 | -1.518561 |
| H                                                   | -2.796203 | 0.028139  | -1.812127 |
| H                                                   | -4.560871 | 0.319463  | 0.947999  |
| C                                                   | 0.834098  | -1.992368 | -0.554205 |
| C                                                   | 1.494114  | -0.866271 | 0.287389  |
| O                                                   | 1.376927  | -3.111030 | -0.511722 |
| O                                                   | -0.170749 | -1.640440 | -1.227288 |
| H                                                   | 0.748761  | -0.305245 | 0.846458  |
| C                                                   | 2.280404  | 0.080230  | -0.620583 |
| N                                                   | 2.416258  | -1.499076 | 1.294802  |
| H                                                   | 1.898988  | -1.880247 | 2.087849  |
| H                                                   | 1.590243  | 0.512769  | -1.341555 |
| H                                                   | 3.061541  | -0.463088 | -1.156048 |
| S                                                   | 3.118537  | 1.439775  | 0.298025  |
| H                                                   | 2.899016  | -2.286263 | 0.845189  |
| H                                                   | 3.093381  | -0.811801 | 1.646572  |
| H                                                   | 1.960406  | 2.003057  | 0.733461  |
| 28                                                  |           |           |           |
| Dimer 29 of the z...z type                          |           |           |           |
| C                                                   | -3.427950 | -0.779506 | 0.006225  |
| C                                                   | -1.865928 | -0.728237 | -0.068480 |
| O                                                   | -4.018761 | -0.863478 | -1.098368 |
| O                                                   | -3.910849 | -0.758243 | 1.157157  |
| H                                                   | -1.508838 | -1.748813 | 0.093836  |
| C                                                   | -1.224122 | 0.182743  | 0.970897  |
| N                                                   | -1.453188 | -0.348127 | -1.456436 |
| H                                                   | -0.485360 | -0.685655 | -1.684456 |
| H                                                   | -0.141330 | 0.200643  | 0.867345  |
| H                                                   | -1.479947 | -0.189338 | 1.959765  |
| S                                                   | -1.755074 | 1.943264  | 0.834475  |
| H                                                   | -2.169313 | -0.705553 | -2.097512 |
| H                                                   | -1.423399 | 0.672030  | -1.544901 |
| H                                                   | -3.029290 | 1.718438  | 1.217318  |
| C                                                   | 1.596724  | 0.260172  | -1.214819 |
| C                                                   | 3.058289  | 0.338310  | -0.688605 |
| O                                                   | 0.936672  | 1.321022  | -1.168785 |
| O                                                   | 1.219636  | -0.865598 | -1.625830 |
| H                                                   | 3.706198  | 0.525912  | -1.547886 |
| C                                                   | 3.533547  | -0.912861 | 0.038763  |
| N                                                   | 3.139054  | 1.557237  | 0.191045  |
| H                                                   | 4.070006  | 1.972797  | 0.225026  |

| Nov 11, 22 15:56 dimers_structures.xyz Page 257/325 |           |           |           |
|-----------------------------------------------------|-----------|-----------|-----------|
| H                                                   | 4.553486  | -0.786813 | 0.404214  |
| H                                                   | 3.515118  | -1.743495 | -0.662638 |
| S                                                   | 2.507520  | -1.342020 | 1.511570  |
| H                                                   | 2.451505  | 2.231605  | -0.178444 |
| H                                                   | 2.847920  | 1.322821  | 1.146702  |
| H                                                   | 1.419905  | -1.705388 | 0.803279  |
| 28                                                  |           |           |           |
| Dimer 30 of the z...z type                          |           |           |           |
| C                                                   | 1.501587  | 1.673546  | -0.055359 |
| C                                                   | 2.391662  | 0.652197  | 0.720067  |
| O                                                   | 0.477390  | 2.067182  | 0.562584  |
| O                                                   | 1.909268  | 2.000948  | -1.184754 |
| H                                                   | 3.200206  | 1.233119  | 1.173197  |
| C                                                   | 3.025447  | -0.430253 | -0.145669 |
| N                                                   | 1.596806  | 0.077386  | 1.855493  |
| H                                                   | 2.194525  | -0.342731 | 2.566692  |
| H                                                   | 3.518823  | -1.180447 | 0.474526  |
| H                                                   | 3.779766  | 0.037133  | -0.774455 |
| S                                                   | 1.868110  | -1.361096 | -1.242438 |
| H                                                   | 1.061954  | 0.843526  | 2.274619  |
| H                                                   | 0.869421  | -0.649527 | 1.571243  |
| H                                                   | 1.636937  | -0.326434 | -2.076166 |
| C                                                   | -1.160534 | -1.843610 | 0.583062  |
| C                                                   | -1.434627 | -0.518060 | -0.173327 |
| O                                                   | -1.826596 | -2.835427 | 0.235046  |
| O                                                   | -0.311985 | -1.757756 | 1.510497  |
| H                                                   | -0.502597 | -0.008784 | -0.391341 |
| C                                                   | -2.337968 | 0.395609  | 0.652037  |
| N                                                   | -2.079628 | -0.845261 | -1.491076 |
| H                                                   | -1.387744 | -1.168361 | -2.168754 |
| H                                                   | -1.846011 | 0.581186  | 1.604662  |
| H                                                   | -3.303196 | -0.077004 | 0.843171  |
| S                                                   | -2.684287 | 2.004542  | -0.179168 |
| H                                                   | -2.742967 | -1.616212 | -1.345982 |
| H                                                   | -2.554692 | -0.022797 | -1.879948 |
| H                                                   | -1.383845 | 2.401171  | -0.148543 |
| 28                                                  |           |           |           |
| Dimer 31 of the z...z type                          |           |           |           |
| C                                                   | 0.935559  | 1.188082  | -0.398375 |
| C                                                   | 2.476551  | 1.324026  | -0.551128 |
| O                                                   | 0.455783  | 1.636973  | 0.688226  |
| O                                                   | 0.334304  | 0.682530  | -1.351214 |
| H                                                   | 2.659754  | 2.137509  | -1.254948 |
| C                                                   | 3.142052  | 0.048380  | -1.065170 |
| N                                                   | 3.051462  | 1.744136  | 0.774983  |
| H                                                   | 3.870640  | 2.345658  | 0.689822  |
| H                                                   | 4.188463  | 0.231028  | -1.312528 |
| H                                                   | 2.615303  | -0.259073 | -1.965872 |
| S                                                   | 3.156164  | -1.327143 | 0.163152  |
| H                                                   | 2.297455  | 2.217516  | 1.293064  |
| H                                                   | 3.309116  | 0.900490  | 1.306771  |
| H                                                   | 1.802352  | -1.467110 | 0.324411  |
| C                                                   | -0.946984 | -1.740906 | 0.164921  |
| C                                                   | -2.123879 | -0.778671 | 0.520734  |
| O                                                   | 0.037395  | -1.701242 | 0.950045  |
| O                                                   | -1.127064 | -2.474707 | -0.823954 |
| H                                                   | -2.900893 | -1.384628 | 0.993215  |
| C                                                   | -2.690967 | -0.062644 | -0.698909 |
| N                                                   | -1.656861 | 0.211574  | 1.545553  |
| H                                                   | -1.249262 | -0.286501 | 2.336920  |
| H                                                   | -2.980114 | -0.812094 | -1.431441 |
| H                                                   | -1.923761 | 0.573682  | -1.139887 |
| S                                                   | -4.125763 | 1.039436  | -0.331507 |
| H                                                   | -0.883531 | 0.829475  | 1.156628  |
| H                                                   | -2.427515 | 0.799193  | 1.868777  |
| H                                                   | -4.983982 | 0.070147  | 0.047723  |
| 28                                                  |           |           |           |
| Dimer 32 of the z...z type                          |           |           |           |
| C                                                   | -0.890969 | -0.466303 | -1.536894 |

| Nov 11, 22 15:56 dimers_structures.xyz Page 258/325 |           |           |           |
|-----------------------------------------------------|-----------|-----------|-----------|
| C                                                   | -1.613316 | 0.070743  | -0.265072 |
| O                                                   | -0.584830 | 0.383601  | -2.400640 |
| O                                                   | -0.701891 | -1.704973 | -1.546104 |
| H                                                   | -1.177320 | -0.390824 | 0.619732  |
| C                                                   | -3.100778 | -0.270830 | -0.337113 |
| N                                                   | -1.395237 | 1.545818  | -0.161534 |
| H                                                   | -0.387679 | 1.771901  | 0.098517  |
| H                                                   | -3.201141 | -1.348746 | -0.448641 |
| H                                                   | -3.561720 | 0.209608  | -1.202745 |
| S                                                   | -4.078963 | 0.300275  | 1.118602  |
| H                                                   | -1.564452 | 1.968011  | -1.078369 |
| H                                                   | -2.022169 | 1.963808  | 0.530557  |
| H                                                   | -3.463388 | -0.481140 | 2.029528  |
| C                                                   | 2.216018  | 1.644521  | 0.303579  |
| C                                                   | 2.091641  | 0.137406  | -0.049536 |
| O                                                   | 3.363264  | 2.106159  | 0.419579  |
| O                                                   | 1.112290  | 2.229526  | 0.477711  |
| H                                                   | 1.386949  | 0.012011  | -0.868102 |
| C                                                   | 1.653324  | -0.647388 | 1.188031  |
| N                                                   | 3.422484  | -0.367428 | -0.535189 |
| H                                                   | 3.594068  | -0.094300 | -1.503957 |
| H                                                   | 0.740274  | -0.197823 | 1.572490  |
| H                                                   | 2.409234  | -0.567290 | 1.972081  |
| S                                                   | 1.411309  | -2.449078 | 0.896694  |
| H                                                   | 4.163816  | 0.061786  | 0.031155  |
| H                                                   | 3.471169  | -1.390711 | -0.475239 |
| H                                                   | 0.457906  | -2.307573 | -0.067021 |
| 28                                                  |           |           |           |
| Dimer 33 of the z...z type                          |           |           |           |
| C                                                   | -1.229055 | 1.047289  | 0.619280  |
| C                                                   | -2.768478 | 1.044872  | 0.778295  |
| O                                                   | -0.788403 | 1.583512  | -0.436753 |
| O                                                   | -0.597630 | 0.484375  | 1.527718  |
| H                                                   | -3.031393 | 1.530758  | 1.718237  |
| C                                                   | -3.320206 | -0.382313 | 0.768474  |
| N                                                   | -3.385766 | 1.855768  | -0.331923 |
| H                                                   | -4.374795 | 2.052097  | -0.167160 |
| H                                                   | -4.395768 | -0.387729 | 0.949480  |
| H                                                   | -2.828929 | -0.934937 | 1.566943  |
| S                                                   | -3.087827 | -1.260375 | -0.838579 |
| H                                                   | -2.881218 | 2.736591  | -0.452896 |
| H                                                   | -3.297875 | 1.337501  | -1.214613 |
| H                                                   | -1.737173 | -1.294609 | -0.816112 |
| C                                                   | 3.700146  | 0.700962  | 0.064677  |
| C                                                   | 2.272394  | 0.065445  | 0.021524  |
| O                                                   | 3.981324  | 1.480425  | -0.882615 |
| O                                                   | 4.399046  | 0.374601  | 1.044444  |
| H                                                   | 1.699858  | 0.448599  | 0.866364  |
| C                                                   | 2.335391  | -1.454671 | 0.099453  |
| N                                                   | 1.573045  | 0.543798  | -1.216393 |
| H                                                   | 2.235052  | 1.207421  | -1.652840 |
| H                                                   | 2.857339  | -1.724078 | 1.014542  |
| H                                                   | 2.892287  | -1.866683 | -0.745319 |
| S                                                   | 0.682879  | -2.285206 | 0.056760  |
| H                                                   | 1.370245  | -0.210448 | -1.871758 |
| H                                                   | 0.662400  | 1.017749  | -0.965404 |
| H                                                   | 0.102319  | -1.492699 | 0.985281  |
| 28                                                  |           |           |           |
| Dimer 34 of the z...z type                          |           |           |           |
| C                                                   | 2.000785  | 1.459883  | -0.321542 |
| C                                                   | 2.079794  | -0.057126 | -0.651224 |
| O                                                   | 2.969754  | 2.162363  | -0.661765 |
| O                                                   | 0.939936  | 1.819979  | 0.256848  |
| H                                                   | 1.373269  | -0.261030 | -1.458162 |
| C                                                   | 1.732224  | -0.951537 | 0.535420  |
| N                                                   | 3.462677  | -0.349312 | -1.167058 |
| H                                                   | 3.486001  | -1.109000 | -1.847459 |
| H                                                   | 1.724996  | -2.002049 | 0.245087  |
| H                                                   | 0.738099  | -0.691213 | 0.883797  |

| Nov 11, 22 15:56 dimers_structures.xyz Page 259/325 |           |           |           |
|-----------------------------------------------------|-----------|-----------|-----------|
| S                                                   | 2.915799  | -0.814244 | 1.942593  |
| H                                                   | 3.821879  | 0.522449  | -1.580656 |
| H                                                   | 4.085188  | -0.584033 | -0.384354 |
| H                                                   | 2.644232  | 0.475356  | 2.232342  |
| C                                                   | -1.208735 | -1.292791 | -0.892911 |
| C                                                   | -1.947238 | -0.227183 | -0.021172 |
| O                                                   | -0.721167 | -0.871220 | -1.971302 |
| O                                                   | -1.206713 | -2.445744 | -0.421788 |
| H                                                   | -1.635365 | -0.325696 | 1.018160  |
| C                                                   | -3.456196 | -0.437856 | -0.134684 |
| N                                                   | -1.555365 | 1.141273  | -0.480540 |
| H                                                   | -0.576828 | 1.386211  | -0.160059 |
| H                                                   | -3.685897 | -1.454016 | 0.179604  |
| H                                                   | -3.781752 | -0.315968 | -1.170023 |
| S                                                   | -4.468162 | 0.761009  | 0.836557  |
| H                                                   | -1.538260 | 1.143596  | -1.504842 |
| H                                                   | -2.208687 | 1.850761  | -0.138578 |
| H                                                   | -4.018535 | 0.389297  | 2.052654  |
| 28                                                  |           |           |           |
| Dimer 35 of the z...z type                          |           |           |           |
| C                                                   | 1.622609  | 0.330185  | -1.205770 |
| C                                                   | 3.071486  | 0.343135  | -0.640991 |
| O                                                   | 0.978400  | 1.396711  | -1.106860 |
| O                                                   | 1.236870  | -0.761251 | -1.694930 |
| H                                                   | 3.747157  | 0.550761  | -1.473579 |
| C                                                   | 3.487661  | -0.956830 | 0.036204  |
| N                                                   | 3.163230  | 1.516656  | 0.297994  |
| H                                                   | 4.101131  | 1.912224  | 0.364430  |
| H                                                   | 4.498813  | -0.881143 | 0.438194  |
| H                                                   | 3.466133  | -1.750629 | -0.706537 |
| S                                                   | 2.403891  | -1.425231 | 1.454817  |
| H                                                   | 2.493706  | 2.220969  | -0.048607 |
| H                                                   | 2.852987  | 1.244543  | 1.237448  |
| H                                                   | 1.323404  | -1.706239 | 0.698848  |
| C                                                   | -3.374359 | -0.818867 | -0.023711 |
| C                                                   | -1.815521 | -0.697473 | -0.099010 |
| O                                                   | -3.963088 | -0.894202 | -1.130190 |
| O                                                   | -3.855415 | -0.852888 | 1.127405  |
| H                                                   | -1.413719 | -1.706196 | 0.030922  |
| C                                                   | -1.213026 | 0.207259  | 0.969014  |
| N                                                   | -1.427014 | -0.256660 | -1.475996 |
| H                                                   | -0.457204 | -0.570479 | -1.730560 |
| H                                                   | -0.131471 | 0.266279  | 0.873487  |
| H                                                   | -1.461870 | -0.200549 | 1.945523  |
| S                                                   | -1.802521 | 1.951173  | 0.874030  |
| H                                                   | -2.147332 | -0.604438 | -2.118717 |
| H                                                   | -1.418337 | 0.766331  | -1.526190 |
| H                                                   | -3.076069 | 1.672100  | 1.222001  |
| 28                                                  |           |           |           |
| Dimer 36 of the z...z type                          |           |           |           |
| C                                                   | -1.215820 | -0.922499 | -0.296173 |
| C                                                   | -2.716130 | -1.289911 | -0.472933 |
| O                                                   | -0.674251 | -1.383619 | 0.749671  |
| O                                                   | -0.704348 | -0.236617 | -1.194633 |
| H                                                   | -2.758045 | -2.162210 | -1.128274 |
| C                                                   | -3.558289 | -0.169274 | -1.071408 |
| N                                                   | -3.248251 | -1.725875 | 0.866309  |
| H                                                   | -4.028633 | -2.379613 | 0.797754  |
| H                                                   | -4.594447 | -0.485283 | -1.199701 |
| H                                                   | -3.144794 | 0.082444  | -2.045033 |
| S                                                   | -3.616817 | 1.345414  | -0.020575 |
| H                                                   | -2.464077 | -2.152298 | 1.379484  |
| H                                                   | -3.551590 | -0.904939 | 1.403536  |
| H                                                   | -2.314808 | 1.661750  | -0.166444 |
| C                                                   | 3.789496  | -0.612834 | -0.462934 |
| C                                                   | 2.397710  | -0.028027 | -0.057807 |
| O                                                   | 4.163521  | -1.625432 | 0.183906  |
| O                                                   | 4.364166  | -0.028100 | -1.402839 |
| H                                                   | 1.686905  | -0.275567 | -0.847896 |

| Nov 11, 22 15:56 dimers_structures.xyz Page 260/325 |           |           |           |
|-----------------------------------------------------|-----------|-----------|-----------|
| C                                                   | 2.434155  | 1.482511  | 0.132534  |
| N                                                   | 1.913463  | -0.738050 | 1.171450  |
| H                                                   | 0.898763  | -1.015015 | 1.067884  |
| H                                                   | 2.765759  | 1.933366  | -0.799496 |
| H                                                   | 3.143720  | 1.758312  | 0.916107  |
| S                                                   | 0.811091  | 2.206460  | 0.646972  |
| H                                                   | 2.527647  | -1.562665 | 1.262214  |
| H                                                   | 2.014790  | -0.168974 | 2.011319  |
| H                                                   | 0.074498  | 1.518535  | -0.254634 |
| 28                                                  |           |           |           |
| Dimer 37 of the z...z type                          |           |           |           |
| C                                                   | 3.750963  | -0.087621 | 0.142392  |
| C                                                   | 2.389227  | 0.377707  | 0.747724  |
| O                                                   | 4.124377  | 0.509288  | -0.897968 |
| O                                                   | 4.296633  | -1.032478 | 0.747949  |
| H                                                   | 2.536757  | 0.628999  | 1.798336  |
| C                                                   | 1.336627  | -0.726279 | 0.663407  |
| N                                                   | 1.934303  | 1.617096  | 0.030652  |
| H                                                   | 2.273385  | 2.454289  | 0.501279  |
| H                                                   | 0.407939  | -0.393443 | 1.124977  |
| H                                                   | 1.709242  | -1.591072 | 1.209046  |
| S                                                   | 0.897413  | -1.238441 | -1.053437 |
| H                                                   | 2.391769  | 1.588542  | -0.890930 |
| H                                                   | 0.882455  | 1.686777  | -0.076709 |
| H                                                   | 2.072335  | -1.838131 | -1.336720 |
| C                                                   | -1.554421 | 1.265858  | 0.475614  |
| C                                                   | -2.974218 | 0.971690  | -0.092677 |
| O                                                   | -0.729784 | 1.706493  | -0.379342 |
| O                                                   | -1.371525 | 1.048453  | 1.680002  |
| H                                                   | -3.578457 | 1.867629  | 0.064588  |
| C                                                   | -3.663024 | -0.223762 | 0.554974  |
| N                                                   | -2.838508 | 0.792613  | -1.580969 |
| H                                                   | -3.688697 | 1.019293  | -2.097571 |
| H                                                   | -4.669366 | -0.358275 | 0.156851  |
| H                                                   | -3.730167 | -0.036944 | 1.624100  |
| S                                                   | -2.786999 | -1.819485 | 0.261675  |
| H                                                   | -2.056063 | 1.390256  | -1.883909 |
| H                                                   | -2.577315 | -0.179559 | -1.786286 |
| H                                                   | -1.679542 | -1.499117 | 0.959617  |
| 28                                                  |           |           |           |
| Dimer 38 of the z...z type                          |           |           |           |
| C                                                   | -1.492786 | -1.123750 | 0.980632  |
| C                                                   | -2.387896 | 0.150905  | 1.101188  |
| O                                                   | -0.337161 | -0.996045 | 1.463716  |
| O                                                   | -2.011245 | -2.126671 | 0.455028  |
| H                                                   | -2.837252 | 0.123573  | 2.098472  |
| C                                                   | -3.515203 | 0.243322  | 0.081417  |
| N                                                   | -1.497114 | 1.353694  | 1.061200  |
| H                                                   | -2.004185 | 2.223491  | 1.220606  |
| H                                                   | -4.118884 | 1.137245  | 0.250031  |
| H                                                   | -4.151095 | -0.630397 | 0.207213  |
| S                                                   | -2.969931 | 0.337882  | -1.676173 |
| H                                                   | -0.753748 | 1.263242  | 1.760730  |
| H                                                   | -0.950491 | 1.417077  | 0.155874  |
| H                                                   | -2.340232 | -0.854632 | -1.677251 |
| C                                                   | 1.389921  | 1.365911  | -0.069080 |
| C                                                   | 2.710714  | 0.807163  | -0.666862 |
| O                                                   | 1.442479  | 1.817144  | 1.096656  |
| O                                                   | 0.401352  | 1.323324  | -0.840933 |
| H                                                   | 3.067129  | 1.536686  | -1.396049 |
| C                                                   | 2.547525  | -0.551586 | -1.348814 |
| N                                                   | 3.722969  | 0.747990  | 0.443049  |
| H                                                   | 4.675748  | 0.949179  | 0.141150  |
| H                                                   | 3.446573  | -0.810026 | -1.909406 |
| H                                                   | 1.710786  | -0.475966 | -2.039825 |
| S                                                   | 2.281457  | -1.949465 | -0.176381 |
| H                                                   | 3.409521  | 1.419523  | 1.160938  |
| H                                                   | 3.695261  | -0.191609 | 0.865872  |
| H                                                   | 1.120063  | -1.512254 | 0.406494  |

| Nov 11, 22 15:56           | dimers_structures.xyz         | Page 261/325 |
|----------------------------|-------------------------------|--------------|
| 28                         |                               |              |
| Dimer 39 of the z...z type |                               |              |
| C                          | -3.338612 -1.222257 0.595688  |              |
| C                          | -2.023056 -0.429760 0.326263  |              |
| O                          | -3.452598 -2.310360 -0.021436 |              |
| O                          | -4.122970 -0.702590 1.418890  |              |
| H                          | -1.303561 -0.693269 1.103990  |              |
| C                          | -2.176540 1.084287 0.341403   |              |
| N                          | -1.416687 -0.882933 -0.965021 |              |
| H                          | -0.393300 -0.601777 -1.030869 |              |
| H                          | -1.213048 1.562375 0.163551   |              |
| H                          | -2.543192 1.385083 1.319503   |              |
| S                          | -3.326754 1.725484 -0.953034  |              |
| H                          | -1.540739 -1.896062 -1.035954 |              |
| H                          | -1.925935 -0.465407 -1.748543 |              |
| H                          | -4.424751 1.116249 -0.459475  |              |
| C                          | 1.499302 0.423352 0.057303    |              |
| C                          | 2.908879 1.081509 0.080363    |              |
| O                          | 0.868841 0.420905 1.132259    |              |
| O                          | 1.134739 -0.020243 -1.062198  |              |
| H                          | 2.790422 2.112513 -0.260411   |              |
| C                          | 3.945172 0.379122 -0.788850   |              |
| N                          | 3.342413 1.144699 1.519672    |              |
| H                          | 3.990886 1.907302 1.716475    |              |
| H                          | 4.908601 0.887552 -0.734541   |              |
| H                          | 3.594625 0.400356 -1.817882   |              |
| S                          | 4.263616 -1.365815 -0.285041  |              |
| H                          | 2.485220 1.240694 2.083857    |              |
| H                          | 3.784097 0.257866 1.789509    |              |
| H                          | 3.027810 -1.816072 -0.585513  |              |
| 28                         |                               |              |
| Dimer 40 of the z...z type |                               |              |
| C                          | -2.042228 0.262512 -1.376646  |              |
| C                          | -2.451669 -0.882491 -0.398290 |              |
| O                          | -0.974249 0.081234 -2.017019  |              |
| O                          | -2.822210 1.232798 -1.415011  |              |
| H                          | -3.295642 -1.402752 -0.857558 |              |
| C                          | -2.890977 -0.372101 0.970375  |              |
| N                          | -1.327604 -1.870069 -0.303341 |              |
| H                          | -1.656633 -2.828130 -0.197185 |              |
| H                          | -3.049364 -1.201846 1.661323  |              |
| H                          | -3.832083 0.159424 0.849088   |              |
| S                          | -1.679292 0.750999 1.794451   |              |
| H                          | -0.767796 -1.788017 -1.163981 |              |
| H                          | -0.631179 -1.680903 0.465935  |              |
| H                          | -1.770701 1.737408 0.879756   |              |
| C                          | 1.670651 -1.334124 0.304999   |              |
| C                          | 2.742634 -0.249616 0.594288   |              |
| O                          | 1.694499 -1.877874 -0.820809  |              |
| O                          | 0.862437 -1.529685 1.244849   |              |
| H                          | 3.362472 -0.599486 1.420021   |              |
| C                          | 2.107633 1.093109 0.972315    |              |
| N                          | 3.618576 -0.132480 -0.624558  |              |
| H                          | 4.614085 -0.081515 -0.413060  |              |
| H                          | 2.857515 1.775966 1.372641    |              |
| H                          | 1.354022 0.899284 1.733298    |              |
| S                          | 1.346388 1.992307 -0.443751   |              |
| H                          | 3.405152 -0.960584 -1.205422  |              |
| H                          | 3.343308 0.695744 -1.170537   |              |
| H                          | 0.456398 1.044844 -0.828556   |              |
| 28                         |                               |              |
| Dimer 41 of the z...z type |                               |              |
| C                          | 1.261246 1.403371 -0.515665   |              |
| C                          | 2.706544 1.047404 -0.065089   |              |
| O                          | 0.585821 2.084665 0.285705    |              |
| O                          | 0.922947 0.952438 -1.636875   |              |
| H                          | 3.382438 1.784474 -0.503829   |              |
| C                          | 3.156056 -0.353844 -0.464678  |              |
| N                          | 2.763220 1.238203 1.427373    |              |

| Nov 11, 22 15:56           | dimers_structures.xyz         | Page 262/325 |
|----------------------------|-------------------------------|--------------|
| H                          | 3.699601 1.446065 1.775415    |              |
| H                          | 4.168134 -0.550640 -0.108224  |              |
| H                          | 3.151534 -0.417015 -1.549921  |              |
| S                          | 2.099836 -1.701389 0.225027   |              |
| H                          | 2.113229 2.003254 1.657940    |              |
| H                          | 2.413244 0.397638 1.901533    |              |
| H                          | 1.060115 -1.536164 -0.615279  |              |
| C                          | -1.509875 -1.994590 0.272041  |              |
| C                          | -1.574372 -0.459723 -0.015384 |              |
| O                          | -1.195388 -2.708245 -0.717805 |              |
| O                          | -1.724664 -2.335477 1.449012  |              |
| H                          | -0.674847 -0.029606 0.422466  |              |
| C                          | -2.791108 0.225223 0.587096   |              |
| N                          | -1.477968 -0.250477 -1.501043 |              |
| H                          | -1.336734 -1.199192 -1.889102 |              |
| H                          | -2.771137 0.060718 1.661717   |              |
| H                          | -3.715557 -0.200750 0.191711  |              |
| S                          | -2.861843 2.038146 0.213941   |              |
| H                          | -2.318705 0.169975 -1.895589  |              |
| H                          | -0.645922 0.348321 -1.726585  |              |
| H                          | -1.530734 2.266629 0.339704   |              |
| 28                         |                               |              |
| Dimer 42 of the z...z type |                               |              |
| C                          | 1.165643 -0.871418 0.979944   |              |
| C                          | 2.587943 -1.168352 0.429751   |              |
| O                          | 0.266765 -1.685163 0.607325   |              |
| O                          | 1.037118 0.110501 1.723883    |              |
| H                          | 3.111964 -1.752377 1.189635   |              |
| C                          | 3.401783 0.076997 0.099619    |              |
| N                          | 2.434439 -2.060807 -0.773385  |              |
| H                          | 3.253476 -2.642591 -0.952274  |              |
| H                          | 4.397902 -0.195420 -0.251140  |              |
| H                          | 3.500039 0.669335 1.006181    |              |
| S                          | 2.658200 1.116618 -1.230059   |              |
| H                          | 1.601897 -2.644889 -0.613153  |              |
| H                          | 2.247380 -1.491101 -1.606923  |              |
| H                          | 1.641507 1.605735 -0.489498   |              |
| C                          | -3.118843 -0.782659 -0.713369 |              |
| C                          | -2.469266 0.301343 0.209414   |              |
| O                          | -3.276909 -1.915503 -0.200956 |              |
| O                          | -3.436321 -0.380146 -1.853119 |              |
| H                          | -3.261770 0.986519 0.516411   |              |
| C                          | -1.354473 1.071516 -0.488383  |              |
| N                          | -1.939808 -0.359229 1.446467  |              |
| H                          | -2.676688 -0.895908 1.902112  |              |
| H                          | -1.728084 1.430637 -1.443299  |              |
| H                          | -0.505803 0.416496 -0.682580  |              |
| S                          | -0.703609 2.505466 0.483573   |              |
| H                          | -1.161035 -1.020821 1.178613  |              |
| H                          | -1.537550 0.319527 2.096715   |              |
| H                          | -1.621056 3.399696 0.062482   |              |
| 28                         |                               |              |
| Dimer 43 of the z...z type |                               |              |
| C                          | 1.549606 0.106802 1.357526    |              |
| C                          | 2.803336 -0.419687 0.605922   |              |
| O                          | 0.851437 -0.784549 1.934589   |              |
| O                          | 1.348498 1.325150 1.329374    |              |
| H                          | 3.662225 -0.273670 1.264444   |              |
| C                          | 3.063333 0.275413 -0.727647   |              |
| N                          | 2.644098 -1.906228 0.422791   |              |
| H                          | 3.531583 -2.401766 0.332607   |              |
| H                          | 4.008658 -0.061736 -1.153976  |              |
| H                          | 3.124530 1.345281 -0.542657   |              |
| S                          | 1.776782 -0.055139 -2.009081  |              |
| H                          | 2.108147 -2.258351 1.227345   |              |
| H                          | 2.079606 -2.084168 -0.417650  |              |
| H                          | 0.826503 0.825539 -1.573521   |              |
| C                          | -1.252641 1.780710 -0.194314  |              |
| C                          | -1.501505 0.268057 0.086639   |              |

Nov 11, 22 15:56

dimers\_structures.xyz

Page 263/325

|                            |           |           |           |
|----------------------------|-----------|-----------|-----------|
| O                          | -1.726304 | 2.576460  | 0.646350  |
| O                          | -0.658412 | 2.027989  | -1.269496 |
| H                          | -0.639224 | -0.319053 | -0.221206 |
| C                          | -2.739606 | -0.179325 | -0.685763 |
| N                          | -1.664728 | 0.077429  | 1.561244  |
| H                          | -0.724563 | -0.182427 | 1.962198  |
| H                          | -2.576448 | 0.016735  | -1.744119 |
| H                          | -3.618929 | 0.381049  | -0.361748 |
| S                          | -3.174420 | -1.956349 | -0.443834 |
| H                          | -1.988563 | 0.974582  | 1.945156  |
| H                          | -2.326098 | -0.669784 | 1.782838  |
| H                          | -2.017701 | -2.459061 | -0.922025 |
| 28                         |           |           |           |
| Dimer 44 of the z...z type |           |           |           |
| C                          | 2.978560  | -0.477051 | -0.979131 |
| C                          | 1.581523  | -0.410139 | -0.287938 |
| O                          | 3.609634  | -1.549375 | -0.818033 |
| O                          | 3.299295  | 0.534172  | -1.639807 |
| H                          | 0.837632  | -0.725087 | -1.023563 |
| C                          | 1.196376  | 0.966567  | 0.237553  |
| N                          | 1.509374  | -1.425599 | 0.812314  |
| H                          | 0.511643  | -1.533159 | 1.136474  |
| H                          | 0.218203  | 0.934721  | 0.717328  |
| H                          | 1.159027  | 1.660984  | -0.597923 |
| S                          | 2.358042  | 1.623849  | 1.512277  |
| H                          | 1.900486  | -2.306766 | 0.473809  |
| H                          | 2.087400  | -1.121667 | 1.600012  |
| H                          | 3.420839  | 1.700829  | 0.684491  |
| C                          | -1.706962 | -1.271155 | 0.304917  |
| C                          | -3.113117 | -0.610506 | 0.256272  |
| O                          | -1.119428 | -1.214873 | 1.425862  |
| O                          | -1.292332 | -1.775808 | -0.747758 |
| H                          | -3.856116 | -1.404062 | 0.360313  |
| C                          | -3.370664 | 0.161820  | -1.032674 |
| N                          | -3.255909 | 0.279438  | 1.463578  |
| H                          | -4.226056 | 0.413156  | 1.751372  |
| H                          | -4.356430 | 0.627644  | -1.018745 |
| H                          | -3.324749 | -0.536622 | -1.864575 |
| S                          | -2.162251 | 1.527906  | -1.316913 |
| H                          | -2.708640 | -0.143090 | 2.225346  |
| H                          | -2.841423 | 1.198878  | 1.272692  |
| H                          | -1.105956 | 0.720731  | -1.536322 |
| 28                         |           |           |           |
| Dimer 45 of the z...z type |           |           |           |
| C                          | -1.422196 | -0.307533 | -0.239643 |
| C                          | -2.746110 | -0.128866 | -1.034772 |
| O                          | -0.960698 | -1.487696 | -0.222882 |
| O                          | -0.929094 | 0.711144  | 0.266951  |
| H                          | -2.471458 | 0.188913  | -2.043069 |
| C                          | -3.701155 | 0.890235  | -0.426043 |
| N                          | -3.390332 | -1.483264 | -1.165744 |
| H                          | -3.981000 | -1.572766 | -1.993077 |
| H                          | -4.602247 | 0.991863  | -1.032083 |
| H                          | -3.192415 | 1.850587  | -0.388960 |
| S                          | -4.273668 | 0.434149  | 1.266402  |
| H                          | -2.629826 | -2.177590 | -1.187539 |
| H                          | -3.958369 | -1.679029 | -0.332919 |
| H                          | -3.058152 | 0.527322  | 1.844198  |
| C                          | 3.873630  | -0.710023 | 0.243827  |
| C                          | 2.401578  | -0.715197 | -0.282264 |
| O                          | 4.043732  | -1.206308 | 1.384497  |
| O                          | 4.721023  | -0.236838 | -0.542063 |
| H                          | 2.298685  | -1.593039 | -0.925960 |
| C                          | 2.020768  | 0.520775  | -1.088023 |
| N                          | 1.463130  | -0.917130 | 0.865765  |
| H                          | 0.549321  | -1.324152 | 0.544910  |
| H                          | 0.977501  | 0.475827  | -1.396484 |
| H                          | 2.657893  | 0.570843  | -1.967313 |
| S                          | 2.184645  | 2.094959  | -0.139566 |

Nov 11, 22 15:56

dimers\_structures.xyz

Page 264/325

|                            |           |           |           |
|----------------------------|-----------|-----------|-----------|
| H                          | 1.944608  | -1.491362 | 1.564888  |
| H                          | 1.234036  | -0.014179 | 1.291855  |
| H                          | 3.530559  | 2.047929  | -0.055615 |
| 28                         |           |           |           |
| Dimer 46 of the z...z type |           |           |           |
| C                          | 1.174906  | -1.175549 | -0.408195 |
| C                          | 2.719096  | -1.293504 | -0.234960 |
| O                          | 0.759048  | -1.016395 | -1.571522 |
| O                          | 0.519588  | -1.273631 | 0.659592  |
| H                          | 2.960238  | -2.358055 | -0.201406 |
| C                          | 3.258102  | -0.614478 | 1.018287  |
| N                          | 3.352968  | -0.739161 | -1.481101 |
| H                          | 4.257232  | -1.158137 | -1.698438 |
| H                          | 4.334350  | -0.764388 | 1.111798  |
| H                          | 2.763787  | -1.056975 | 1.879652  |
| S                          | 3.001257  | 1.211942  | 1.027202  |
| H                          | 2.683963  | -0.895437 | -2.249598 |
| H                          | 3.473877  | 0.276548  | -1.382690 |
| H                          | 1.651955  | 1.174695  | 0.982725  |
| C                          | -3.706678 | -0.593234 | 0.130992  |
| C                          | -2.606139 | 0.496663  | 0.365061  |
| O                          | -3.762692 | -1.503181 | 0.996203  |
| O                          | -4.425891 | -0.417686 | -0.872526 |
| H                          | -3.116314 | 1.388276  | 0.734151  |
| C                          | -1.831564 | 0.819032  | -0.904838 |
| N                          | -1.692558 | 0.020689  | 1.455494  |
| H                          | -2.246568 | -0.623365 | 2.034598  |
| H                          | -2.533687 | 1.162344  | -1.660290 |
| H                          | -1.310678 | -0.062807 | -1.278533 |
| S                          | -0.490869 | 2.066461  | -0.677319 |
| H                          | -0.869572 | -0.522345 | 1.070515  |
| H                          | -1.323597 | 0.785647  | 2.017122  |
| H                          | -1.280815 | 3.082411  | -0.270520 |
| 28                         |           |           |           |
| Dimer 47 of the z...z type |           |           |           |
| C                          | -3.574482 | -0.255966 | 0.793611  |
| C                          | -2.076130 | -0.341827 | 0.373777  |
| O                          | -4.305003 | -1.193632 | 0.390261  |
| O                          | -3.877624 | 0.723729  | 1.508831  |
| H                          | -1.524807 | -0.830378 | 1.179962  |
| C                          | -1.412214 | 1.001662  | 0.103609  |
| N                          | -1.932652 | -1.241465 | -0.816441 |
| H                          | -0.912764 | -1.474087 | -0.975555 |
| H                          | -0.375738 | 0.860379  | -0.203532 |
| H                          | -1.435678 | 1.591415  | 1.016235  |
| S                          | -2.207184 | 1.963100  | -1.257277 |
| H                          | -2.503213 | -2.076125 | -0.668807 |
| H                          | -2.297982 | -0.771978 | -1.648951 |
| H                          | -3.384470 | 2.129699  | -0.619216 |
| C                          | 1.262463  | -1.361168 | 0.075959  |
| C                          | 2.728410  | -0.858122 | 0.119711  |
| O                          | 0.745224  | -1.414115 | -1.080181 |
| O                          | 0.728836  | -1.588659 | 1.169112  |
| H                          | 3.312003  | -1.456600 | 0.816317  |
| C                          | 2.732820  | 0.613413  | 0.538709  |
| N                          | 3.344235  | -1.013181 | -1.244692 |
| H                          | 3.606044  | -1.982727 | -1.428983 |
| H                          | 2.252475  | 0.688949  | 1.512280  |
| H                          | 2.163645  | 1.216144  | -0.172352 |
| S                          | 4.407255  | 1.378565  | 0.594614  |
| H                          | 2.641896  | -0.753103 | -1.947716 |
| H                          | 4.181278  | -0.427335 | -1.342361 |
| H                          | 4.898436  | 0.595099  | 1.576785  |
| 28                         |           |           |           |
| Dimer 48 of the z...z type |           |           |           |
| C                          | 1.374079  | 0.715665  | -0.978441 |
| C                          | 1.330288  | -0.152758 | 0.311401  |
| O                          | 1.982489  | 0.218368  | -1.953623 |
| O                          | 0.853109  | 1.849672  | -0.870005 |

| Nov 11, 22 15:56 dimers_structures.xyz Page 265/325 |           |           |           |
|-----------------------------------------------------|-----------|-----------|-----------|
| H                                                   | 0.366342  | -0.032343 | 0.802121  |
| C                                                   | 2.421330  | 0.282263  | 1.290627  |
| N                                                   | 1.452356  | -1.593972 | -0.080392 |
| H                                                   | 0.487644  | -2.015049 | -0.076649 |
| H                                                   | 2.320134  | -0.250546 | 2.237868  |
| H                                                   | 2.293799  | 1.347338  | 1.481467  |
| S                                                   | 4.148802  | -0.060149 | 0.736036  |
| H                                                   | 1.844358  | -1.595356 | -1.032677 |
| H                                                   | 2.066960  | -2.128355 | 0.533063  |
| H                                                   | 4.028690  | 0.480909  | -0.494437 |
| C                                                   | -1.660962 | -1.210881 | -0.577973 |
| C                                                   | -3.037504 | -0.610059 | -0.186497 |
| O                                                   | -1.193684 | -2.079275 | 0.221958  |
| O                                                   | -1.148491 | -0.794826 | -1.623216 |
| H                                                   | -3.795282 | -1.111972 | -0.791803 |
| C                                                   | -3.134033 | 0.898251  | -0.403639 |
| N                                                   | -3.317811 | -0.972180 | 1.248613  |
| H                                                   | -4.313229 | -0.994474 | 1.472682  |
| H                                                   | -4.151329 | 1.244941  | -0.219312 |
| H                                                   | -2.876235 | 1.104559  | -1.439762 |
| S                                                   | -2.042293 | 1.887756  | 0.708628  |
| H                                                   | -2.883307 | -1.886236 | 1.430420  |
| H                                                   | -2.855538 | -0.292847 | 1.865742  |
| H                                                   | -0.876609 | 1.761649  | 0.007625  |
| 28                                                  |           |           |           |
| Dimer 49 of the z...z type                          |           |           |           |
| C                                                   | 1.798859  | -1.315579 | 0.375055  |
| C                                                   | 2.683684  | -0.089257 | 0.750022  |
| O                                                   | 2.211020  | -2.043709 | -0.549322 |
| O                                                   | 0.772494  | -1.438005 | 1.087508  |
| H                                                   | 3.160613  | -0.317233 | 1.704456  |
| C                                                   | 1.889769  | 1.208883  | 0.881490  |
| N                                                   | 3.773786  | 0.025160  | -0.280796 |
| H                                                   | 4.669410  | 0.327144  | 0.101366  |
| H                                                   | 2.506249  | 2.002121  | 1.306023  |
| H                                                   | 1.051017  | 1.012324  | 1.545961  |
| S                                                   | 1.273087  | 1.873250  | -0.722756 |
| H                                                   | 3.853047  | -0.904873 | -0.722164 |
| H                                                   | 3.481082  | 0.687809  | -1.011649 |
| H                                                   | 0.528789  | 0.799389  | -1.101279 |
| C                                                   | -1.858263 | 0.010465  | -1.442285 |
| C                                                   | -2.582339 | -0.840125 | -0.355996 |
| O                                                   | -0.790744 | -0.476192 | -1.895967 |
| O                                                   | -2.414382 | 1.085119  | -1.737761 |
| H                                                   | -3.444096 | -1.314569 | -0.833754 |
| C                                                   | -3.096385 | -0.010213 | 0.814623  |
| N                                                   | -1.673894 | -1.949953 | 0.086110  |
| H                                                   | -2.138115 | -2.590815 | 0.730284  |
| H                                                   | -3.566786 | -0.642820 | 1.569506  |
| H                                                   | -3.846576 | 0.674657  | 0.425263  |
| S                                                   | -1.811880 | 0.959847  | 1.711144  |
| H                                                   | -1.373209 | -2.474956 | -0.736581 |
| H                                                   | -0.769880 | -1.621037 | 0.526722  |
| H                                                   | -1.421008 | 1.697918  | 0.650627  |
| 28                                                  |           |           |           |
| Dimer 50 of the z...z type                          |           |           |           |
| C                                                   | -1.216786 | -1.343003 | 0.101630  |
| C                                                   | -2.580240 | -1.043400 | 0.790522  |
| O                                                   | -0.222677 | -1.304242 | 0.889036  |
| O                                                   | -1.216056 | -1.596136 | -1.110742 |
| H                                                   | -2.884814 | -1.963714 | 1.294371  |
| C                                                   | -3.695317 | -0.593529 | -0.142627 |
| N                                                   | -2.316646 | -0.034358 | 1.877657  |
| H                                                   | -3.036374 | -0.029768 | 2.601835  |
| H                                                   | -4.635702 | -0.490100 | 0.400089  |
| H                                                   | -3.816373 | -1.356624 | -0.908439 |
| S                                                   | -3.396309 | 1.038238  | -0.943658 |
| H                                                   | -1.401604 | -0.257951 | 2.290206  |
| H                                                   | -2.259091 | 0.908190  | 1.471662  |

| Nov 11, 22 15:56 dimers_structures.xyz Page 266/325 |           |           |           |
|-----------------------------------------------------|-----------|-----------|-----------|
| H                                                   | -2.265860 | 0.666551  | -1.578758 |
| C                                                   | 3.930030  | -0.204860 | -0.025388 |
| C                                                   | 2.534981  | 0.326320  | -0.502826 |
| O                                                   | 4.172843  | -1.409312 | -0.288363 |
| O                                                   | 4.655998  | 0.639267  | 0.536762  |
| H                                                   | 2.714199  | 0.957464  | -1.374766 |
| C                                                   | 1.815264  | 1.117956  | 0.581870  |
| N                                                   | 1.708058  | -0.843023 | -0.948055 |
| H                                                   | 2.367008  | -1.589167 | -1.203551 |
| H                                                   | 2.466009  | 1.917442  | 0.925494  |
| H                                                   | 1.578227  | 0.473189  | 1.429007  |
| S                                                   | 0.193205  | 1.816419  | 0.047838  |
| H                                                   | 1.084138  | -1.184293 | -0.170455 |
| H                                                   | 1.075384  | -0.631687 | -1.719134 |
| H                                                   | 0.676179  | 2.854113  | -0.664289 |
| 28                                                  |           |           |           |
| Dimer 51 of the z...z type                          |           |           |           |
| C                                                   | 1.089383  | -0.523344 | 0.046518  |
| C                                                   | 2.117191  | 0.521957  | -0.476405 |
| O                                                   | 0.541671  | -0.222711 | 1.149541  |
| O                                                   | 0.871995  | -1.494219 | -0.686318 |
| H                                                   | 1.603561  | 1.107813  | -1.241488 |
| C                                                   | 3.375752  | -0.094724 | -1.072910 |
| N                                                   | 2.436028  | 1.468399  | 0.649518  |
| H                                                   | 2.695339  | 2.402449  | 0.331010  |
| H                                                   | 4.048545  | 0.675473  | -1.451930 |
| H                                                   | 3.076609  | -0.736851 | -1.898175 |
| S                                                   | 4.358957  | -1.072095 | 0.143006  |
| H                                                   | 1.600705  | 1.508707  | 1.251761  |
| H                                                   | 3.200751  | 1.088342  | 1.219100  |
| H                                                   | 3.426698  | -2.027945 | 0.336556  |
| C                                                   | -3.583083 | -1.039413 | -0.258820 |
| C                                                   | -2.845715 | 0.231223  | 0.290893  |
| O                                                   | -3.577619 | -2.040403 | 0.501987  |
| O                                                   | -4.112170 | -0.904426 | -1.378695 |
| H                                                   | -3.612161 | 0.960906  | 0.553595  |
| C                                                   | -1.891831 | 0.820211  | -0.739494 |
| N                                                   | -2.134555 | -0.156898 | 1.557828  |
| H                                                   | -2.252775 | 0.529719  | 2.299632  |
| H                                                   | -2.457665 | 1.059217  | -1.635994 |
| H                                                   | -1.130697 | 0.089192  | -1.012733 |
| S                                                   | -0.986775 | 2.328447  | -0.171155 |
| H                                                   | -2.557007 | -1.060383 | 1.828537  |
| H                                                   | -1.100747 | -0.298204 | 1.411246  |
| H                                                   | -1.967569 | 3.218042  | -0.422977 |
| 28                                                  |           |           |           |
| Dimer 52 of the z...z type                          |           |           |           |
| C                                                   | -3.825513 | -0.715135 | 0.074962  |
| C                                                   | -2.454783 | -0.419215 | 0.765971  |
| O                                                   | -3.866091 | -1.746673 | -0.641435 |
| O                                                   | -4.731837 | 0.105080  | 0.324223  |
| H                                                   | -2.571904 | -0.666396 | 1.823318  |
| C                                                   | -2.023789 | 1.039021  | 0.658054  |
| N                                                   | -1.422585 | -1.352316 | 0.201369  |
| H                                                   | -0.853160 | -1.771454 | 0.936281  |
| H                                                   | -1.018952 | 1.168933  | 1.058474  |
| H                                                   | -2.714966 | 1.646324  | 1.237802  |
| S                                                   | -1.984230 | 1.685820  | -1.070231 |
| H                                                   | -1.946660 | -2.063137 | -0.330170 |
| H                                                   | -0.723196 | -0.862230 | -0.404721 |
| H                                                   | -3.324476 | 1.697108  | -1.226740 |
| C                                                   | 1.364284  | 0.042895  | 0.422985  |
| C                                                   | 2.677678  | 0.874322  | 0.464014  |
| O                                                   | 0.967416  | -0.419714 | 1.517752  |
| O                                                   | 0.815992  | -0.048029 | -0.700285 |
| H                                                   | 2.388130  | 1.922786  | 0.562532  |
| C                                                   | 3.563605  | 0.708143  | -0.763954 |
| N                                                   | 3.403972  | 0.502672  | 1.728019  |
| H                                                   | 3.995663  | 1.250772  | 2.090205  |

| Nov 11, 22 15:56 dimers_structures.xyz Page 267/325 |           |           |           |
|-----------------------------------------------------|-----------|-----------|-----------|
| H                                                   | 4.464027  | 1.317979  | -0.681832 |
| H                                                   | 2.999152  | 1.031152  | -1.635419 |
| S                                                   | 4.143479  | -1.023931 | -1.016585 |
| H                                                   | 2.683753  | 0.241524  | 2.417851  |
| H                                                   | 3.984726  | -0.328196 | 1.564412  |
| H                                                   | 2.918333  | -1.536800 | -1.254202 |
| 28                                                  |           |           |           |
| Dimer 53 of the z...z type                          |           |           |           |
| C                                                   | 1.630112  | -1.221826 | 0.751690  |
| C                                                   | 2.051274  | -0.876967 | -0.705912 |
| O                                                   | 0.644864  | -0.601825 | 1.225695  |
| O                                                   | 2.356144  | -2.068335 | 1.307175  |
| H                                                   | 2.084454  | -1.802851 | -1.281818 |
| C                                                   | 3.431993  | -0.221451 | -0.741145 |
| N                                                   | 1.025545  | 0.000805  | -1.354536 |
| H                                                   | 1.255607  | 0.190351  | -2.330676 |
| H                                                   | 3.746903  | -0.024471 | -1.767543 |
| H                                                   | 4.145087  | -0.903524 | -0.282799 |
| S                                                   | 3.503520  | 1.415419  | 0.111241  |
| H                                                   | 0.072387  | -0.458903 | -1.312182 |
| H                                                   | 0.978979  | 0.897322  | -0.862144 |
| H                                                   | 3.226477  | 0.957068  | 1.349282  |
| C                                                   | -2.239302 | -1.169004 | -0.432380 |
| C                                                   | -3.059412 | 0.154897  | -0.542904 |
| O                                                   | -2.636581 | -1.988906 | 0.414902  |
| O                                                   | -1.301590 | -1.288627 | -1.262008 |
| H                                                   | -3.741286 | 0.018493  | -1.384706 |
| C                                                   | -2.231372 | 1.414220  | -0.776636 |
| N                                                   | -3.905212 | 0.267652  | 0.694550  |
| H                                                   | -4.810473 | 0.708563  | 0.532792  |
| H                                                   | -2.879261 | 2.262911  | -0.999699 |
| H                                                   | -1.595658 | 1.241583  | -1.642858 |
| S                                                   | -1.227188 | 1.940732  | 0.678130  |
| H                                                   | -4.022081 | -0.695233 | 1.049012  |
| H                                                   | -3.398177 | 0.806774  | 1.408664  |
| H                                                   | -0.492931 | 0.796056  | 0.838281  |
| 28                                                  |           |           |           |
| Dimer 54 of the z...z type                          |           |           |           |
| C                                                   | 3.579267  | 1.195762  | 0.569272  |
| C                                                   | 2.233245  | 0.465229  | 0.274541  |
| O                                                   | 3.787219  | 2.239547  | -0.098285 |
| O                                                   | 4.291261  | 0.679698  | 1.457750  |
| H                                                   | 1.491254  | 0.822442  | 0.991792  |
| C                                                   | 2.289672  | -1.050655 | 0.396205  |
| N                                                   | 1.727710  | 0.868131  | -1.075088 |
| H                                                   | 0.682770  | 0.687187  | -1.166937 |
| H                                                   | 1.310213  | -1.480271 | 0.186143  |
| H                                                   | 2.574841  | -1.305565 | 1.413783  |
| S                                                   | 3.473906  | -1.844997 | -0.776469 |
| H                                                   | 1.956089  | 1.856817  | -1.211666 |
| H                                                   | 2.224827  | 0.343777  | -1.799885 |
| H                                                   | 4.575526  | -1.265972 | -0.255075 |
| C                                                   | -1.341953 | -0.117419 | -0.121550 |
| C                                                   | -2.845957 | -0.501417 | -0.140029 |
| O                                                   | -0.745993 | -0.224058 | 0.966919  |
| O                                                   | -0.900510 | 0.306092  | -1.221480 |
| H                                                   | -3.068726 | -1.117567 | -1.008764 |
| C                                                   | -3.694675 | 0.770695  | -0.149654 |
| N                                                   | -3.135911 | -1.316615 | 1.090791  |
| H                                                   | -2.869687 | -2.294097 | 0.965389  |
| H                                                   | -3.443412 | 1.337935  | -1.043582 |
| H                                                   | -3.467938 | 1.386505  | 0.722935  |
| S                                                   | -5.510671 | 0.470117  | -0.077133 |
| H                                                   | -2.558864 | -0.943814 | 1.856710  |
| H                                                   | -4.131946 | -1.283915 | 1.335077  |
| H                                                   | -5.602731 | -0.189383 | -1.250143 |
| 28                                                  |           |           |           |
| Dimer 55 of the z...z type                          |           |           |           |
| C                                                   | -1.583561 | 1.335964  | 0.284714  |

| Nov 11, 22 15:56 dimers_structures.xyz Page 268/325 |           |           |           |
|-----------------------------------------------------|-----------|-----------|-----------|
| C                                                   | -1.388380 | -0.131211 | -0.214867 |
| O                                                   | -1.045963 | 1.592065  | 1.392577  |
| O                                                   | -2.200398 | 2.098489  | -0.483764 |
| H                                                   | -0.456908 | -0.135961 | -0.787373 |
| C                                                   | -2.505943 | -0.661874 | -1.100304 |
| N                                                   | -1.145451 | -1.022599 | 0.963375  |
| H                                                   | -0.469175 | -1.773168 | 0.716043  |
| H                                                   | -2.291541 | -1.679228 | -1.431413 |
| H                                                   | -2.589308 | -0.017443 | -1.972023 |
| S                                                   | -4.142704 | -0.743798 | -0.251365 |
| H                                                   | -0.701655 | -0.446175 | 1.691849  |
| H                                                   | -2.023495 | -1.398361 | 1.328434  |
| H                                                   | -4.241677 | 0.586310  | -0.047620 |
| C                                                   | 1.869966  | -1.239084 | 0.672782  |
| C                                                   | 3.118974  | -0.702418 | -0.081787 |
| O                                                   | 1.180863  | -2.095684 | 0.045002  |
| O                                                   | 1.659880  | -0.767853 | 1.801204  |
| H                                                   | 3.988432  | -1.255266 | 0.279478  |
| C                                                   | 3.347268  | 0.792357  | 0.113289  |
| N                                                   | 2.957238  | -1.048205 | -1.539132 |
| H                                                   | 3.844487  | -1.159778 | -2.030452 |
| H                                                   | 4.223870  | 1.127338  | -0.442713 |
| H                                                   | 3.514426  | 0.974384  | 1.171997  |
| S                                                   | 1.937477  | 1.832985  | -0.465315 |
| H                                                   | 2.404541  | -1.916725 | -1.581382 |
| H                                                   | 2.409146  | -0.321019 | -2.012392 |
| H                                                   | 1.084978  | 1.505186  | 0.531645  |
| 28                                                  |           |           |           |
| Dimer 56 of the z...z type                          |           |           |           |
| C                                                   | -2.486332 | -1.418852 | 0.099031  |
| C                                                   | -2.797870 | -0.181698 | -0.802872 |
| O                                                   | -3.474174 | -1.999570 | 0.585737  |
| O                                                   | -1.270900 | -1.709207 | 0.232009  |
| H                                                   | -2.775946 | -0.525232 | -1.839205 |
| C                                                   | -1.840332 | 0.991696  | -0.644979 |
| N                                                   | -4.215765 | 0.230605  | -0.508256 |
| H                                                   | -4.693644 | 0.647056  | -1.307510 |
| H                                                   | -2.160155 | 1.832790  | -1.262174 |
| H                                                   | -0.850015 | 0.707544  | -0.985279 |
| S                                                   | -1.749703 | 1.653884  | 1.072010  |
| H                                                   | -4.703812 | -0.622104 | -0.191074 |
| H                                                   | -4.233351 | 0.898181  | 0.270894  |
| H                                                   | -1.361599 | 0.499431  | 1.651341  |
| C                                                   | 1.820900  | 1.235113  | -0.342042 |
| C                                                   | 1.615198  | -0.173232 | 0.306729  |
| O                                                   | 1.428733  | 1.341394  | -1.533380 |
| O                                                   | 2.341942  | 2.091506  | 0.394937  |
| H                                                   | 0.801970  | -0.081674 | 1.028086  |
| C                                                   | 2.850832  | -0.681429 | 1.037989  |
| N                                                   | 1.138783  | -1.117771 | -0.758507 |
| H                                                   | 0.171237  | -1.449843 | -0.522011 |
| H                                                   | 2.660641  | -1.651720 | 1.499986  |
| H                                                   | 3.100381  | 0.034753  | 1.817558  |
| S                                                   | 4.317782  | -0.929497 | -0.053358 |
| H                                                   | 1.109096  | -0.547881 | -1.621421 |
| H                                                   | 1.768066  | -1.906536 | -0.905435 |
| H                                                   | 4.437562  | 0.362636  | -0.422397 |
| 28                                                  |           |           |           |
| Dimer 57 of the z...z type                          |           |           |           |
| C                                                   | -1.457499 | 1.476152  | 0.184829  |
| C                                                   | -1.989064 | 0.241678  | 0.977436  |
| O                                                   | -2.051142 | 2.550780  | 0.390860  |
| O                                                   | -0.467113 | 1.269811  | -0.560750 |
| H                                                   | -1.388037 | 0.164461  | 1.886411  |
| C                                                   | -1.942370 | -1.086267 | 0.236364  |
| N                                                   | -3.392060 | 0.573998  | 1.413007  |
| H                                                   | -3.675119 | 0.095523  | 2.268491  |
| H                                                   | -2.409247 | -1.871253 | 0.833964  |
| H                                                   | -0.909082 | -1.381075 | 0.073256  |

| Nov 11, 22 15:56           | dimers_structures.xyz |           | Page 269/325 |
|----------------------------|-----------------------|-----------|--------------|
| S                          | -2.853178             | -1.076490 | -1.366185    |
| H                          | -3.427056             | 1.597057  | 1.537501     |
| H                          | -4.055949             | 0.335770  | 0.667962     |
| H                          | -2.065983             | -0.159610 | -1.965678    |
| C                          | 1.847361              | -1.931439 | 0.562869     |
| C                          | 2.323837              | -0.688786 | -0.260875    |
| O                          | 0.956260              | -2.632839 | 0.019623     |
| O                          | 2.425422              | -2.102338 | 1.653270     |
| H                          | 3.296211              | -0.942589 | -0.686920    |
| C                          | 2.432650              | 0.570390  | 0.589981     |
| N                          | 1.375340              | -0.476273 | -1.406076    |
| H                          | 1.021153              | -1.396410 | -1.687516    |
| H                          | 3.106643              | 0.373165  | 1.419318     |
| H                          | 1.456205              | 0.843036  | 0.990679     |
| S                          | 2.998169              | 2.059097  | -0.342649    |
| H                          | 0.559952              | 0.113532  | -1.093868    |
| H                          | 1.818988              | -0.004401 | -2.192866    |
| H                          | 4.271602              | 1.653308  | -0.525561    |
| 28                         |                       |           |              |
| Dimer 58 of the z...z type |                       |           |              |
| C                          | 1.248306              | -0.025310 | 0.624098     |
| C                          | 2.395968              | 0.725102  | -0.104463    |
| O                          | 1.103896              | 0.221600  | 1.839561     |
| O                          | 0.540938              | -0.767488 | -0.103958    |
| H                          | 1.953275              | 1.633062  | -0.520608    |
| C                          | 3.066204              | -0.067435 | -1.217905    |
| N                          | 3.382554              | 1.163836  | 0.943133     |
| H                          | 3.911147              | 1.996146  | 0.680017     |
| H                          | 3.845587              | 0.521909  | -1.702346    |
| H                          | 2.307829              | -0.319371 | -1.955424    |
| S                          | 3.885446              | -1.610436 | -0.628415    |
| H                          | 2.844168              | 1.335167  | 1.804901     |
| H                          | 4.043618              | 0.403703  | 1.141858     |
| H                          | 2.746817              | -2.218732 | -0.236396    |
| C                          | -3.762803             | -0.991539 | -0.115529    |
| C                          | -2.790604             | 0.168144  | 0.292471     |
| O                          | -3.677937             | -2.039731 | 0.570878     |
| O                          | -4.537852             | -0.728407 | -1.057080    |
| H                          | -3.387878             | 0.905366  | 0.832383     |
| C                          | -2.117223             | 0.815010  | -0.911480    |
| N                          | -1.772195             | -0.373407 | 1.249357     |
| H                          | -2.214329             | -1.135264 | 1.773831     |
| H                          | -2.886760             | 1.127033  | -1.612532    |
| H                          | -1.458617             | 0.101597  | -1.408298    |
| S                          | -1.029879             | 2.249005  | -0.498976    |
| H                          | -0.938564             | -0.756623 | 0.732238     |
| H                          | -1.388955             | 0.332736  | 1.878187     |
| H                          | -2.010346             | 3.091542  | -0.115326    |
| 28                         |                       |           |              |
| Dimer 59 of the z...z type |                       |           |              |
| C                          | -3.894020             | -0.507369 | -0.082529    |
| C                          | -2.642486             | -0.317177 | 0.831756     |
| O                          | -3.968634             | -1.605991 | -0.681476    |
| O                          | -4.685893             | 0.459083  | -0.101362    |
| H                          | -2.956249             | -0.485440 | 1.865333     |
| C                          | -2.020666             | 1.072465  | 0.741887     |
| N                          | -1.627985             | -1.375809 | 0.518431     |
| H                          | -2.042747             | -2.301906 | 0.615652     |
| H                          | -1.145526             | 1.149248  | 1.386798     |
| H                          | -2.767252             | 1.798489  | 1.053908     |
| S                          | -1.422045             | 1.515573  | -0.946052    |
| H                          | -1.310086             | -1.293712 | -0.452107    |
| H                          | -0.763689             | -1.264745 | 1.092542     |
| H                          | -2.641580             | 1.547432  | -1.521724    |
| C                          | 1.282808              | -0.402912 | 0.199494     |
| C                          | 2.233775              | 0.788868  | -0.102265    |
| O                          | 0.779056              | -0.409067 | 1.361131     |
| O                          | 1.065780              | -1.193422 | -0.731257    |
| H                          | 1.628037              | 1.554469  | -0.592443    |

| Nov 11, 22 15:56           | dimers_structures.xyz |           | Page 270/325 |
|----------------------------|-----------------------|-----------|--------------|
| C                          | 3.415014              | 0.431905  | -0.994240    |
| N                          | 2.682945              | 1.367174  | 1.212850     |
| H                          | 2.925993              | 2.356553  | 1.157472     |
| H                          | 4.034556              | 1.307561  | -1.192380    |
| H                          | 3.024832              | 0.057115  | -1.937553    |
| S                          | 4.536582              | -0.828072 | -0.248858    |
| H                          | 1.914362              | 1.220139  | 1.882462     |
| H                          | 3.496842              | 0.847752  | 1.562337     |
| H                          | 3.627890              | -1.825057 | -0.244710    |
| 28                         |                       |           |              |
| Dimer 60 of the z...z type |                       |           |              |
| C                          | -1.102841             | -0.841680 | 0.220059     |
| C                          | -1.861361             | 0.509241  | 0.377216     |
| O                          | -0.996209             | -1.288950 | -0.945641    |
| O                          | -0.709492             | -1.344492 | 1.295278     |
| H                          | -1.288806             | 1.153774  | 1.043264     |
| C                          | -3.256071             | 0.291851  | 0.960311     |
| N                          | -1.913097             | 1.201601  | -0.951161    |
| H                          | -2.529730             | 2.013841  | -0.946122    |
| H                          | -3.760791             | 1.244278  | 1.133807     |
| H                          | -3.145030             | -0.216956 | 1.916759     |
| S                          | -4.407581             | -0.664212 | -0.121800    |
| H                          | -0.927947             | 1.499859  | -1.209646    |
| H                          | -2.234498             | 0.536337  | -1.658747    |
| H                          | -3.645793             | -1.773008 | -0.222722    |
| C                          | 1.284711              | 1.608509  | -0.261805    |
| C                          | 2.584483              | 0.764154  | -0.253298    |
| O                          | 0.920714              | 2.095342  | 0.825861     |
| O                          | 0.695738              | 1.641338  | -1.373799    |
| H                          | 3.195721              | 0.991189  | -1.124366    |
| C                          | 2.202352              | -0.716342 | -0.220134    |
| N                          | 3.378742              | 1.122953  | 0.974501     |
| H                          | 3.908136              | 1.986053  | 0.843263     |
| H                          | 1.575800              | -0.930657 | -1.083091    |
| H                          | 1.606060              | -0.940776 | 0.666723     |
| S                          | 3.638066              | -1.865663 | -0.157737    |
| H                          | 2.714653              | 1.289185  | 1.741948     |
| H                          | 4.037151              | 0.376129  | 1.222189     |
| H                          | 4.154147              | -1.543426 | -1.361724    |
| 28                         |                       |           |              |
| Dimer 61 of the z...z type |                       |           |              |
| C                          | -3.660277             | -1.119843 | 0.505331     |
| C                          | -2.258022             | -0.483470 | 0.264676     |
| O                          | -3.925213             | -2.131398 | -0.190157    |
| O                          | -4.357790             | -0.570233 | 1.385711     |
| H                          | -1.564037             | -0.900440 | 0.997375     |
| C                          | -2.213042             | 1.031482  | 0.406635     |
| N                          | -1.734881             | -0.896464 | -1.075706    |
| H                          | -0.692716             | -0.694891 | -1.153485    |
| H                          | -1.200366             | 1.396177  | 0.233571     |
| H                          | -2.515090             | 1.293456  | 1.417476     |
| S                          | -3.298156             | 1.920871  | -0.793983    |
| H                          | -1.945896             | -1.886929 | -1.215271    |
| H                          | -2.226892             | -0.380296 | -1.809583    |
| H                          | -4.454530             | 1.414306  | -0.317476    |
| C                          | 1.315271              | 0.014513  | -0.017170    |
| C                          | 2.796694              | 0.474831  | 0.011290     |
| O                          | 0.743155              | -0.125920 | 1.079860     |
| O                          | 0.863475              | -0.204499 | -1.171745    |
| H                          | 2.950260              | 1.291308  | -0.691998    |
| C                          | 3.706427              | -0.706952 | -0.329707    |
| N                          | 3.103744              | 0.995655  | 1.389203     |
| H                          | 2.770148              | 1.952725  | 1.509390     |
| H                          | 3.445694              | -1.055056 | -1.327004    |
| H                          | 3.546047              | -1.527880 | 0.372255     |
| S                          | 5.507973              | -0.332310 | -0.237564    |
| H                          | 2.598198              | 0.416885  | 2.071877     |
| H                          | 4.112591              | 0.980170  | 1.576213     |
| H                          | 5.526155              | 0.582181  | -1.228750    |



| Nov 11, 22 15:56           | dimers_structures.xyz         | Page 271/325 |
|----------------------------|-------------------------------|--------------|
| 28                         |                               |              |
| Dimer 62 of the z...z type |                               |              |
| C                          | -3.409144 1.554955 -0.473299  |              |
| C                          | -2.501983 0.348762 -0.069069  |              |
| O                          | -3.440835 2.511898 0.343439   |              |
| O                          | -3.983143 1.447824 -1.575647  |              |
| H                          | -1.623498 0.358369 -0.715646  |              |
| C                          | -3.217495 -0.987886 -0.213792 |              |
| N                          | -1.993637 0.568095 1.324918   |              |
| H                          | -0.950907 0.385420 1.376148   |              |
| H                          | -3.519458 -1.097871 -1.252494 |              |
| H                          | -4.115928 -1.016917 0.406996  |              |
| S                          | -2.198024 -2.440002 0.312299  |              |
| H                          | -2.217980 1.552290 1.540116   |              |
| H                          | -2.464937 -0.025895 2.006203  |              |
| H                          | -1.055672 -2.030019 -0.286869 |              |
| C                          | 1.130712 -0.353869 0.224406   |              |
| C                          | 2.677978 -0.461437 0.196990   |              |
| O                          | 0.524564 -0.702403 -0.810556  |              |
| O                          | 0.664027 0.119187 1.289798    |              |
| H                          | 3.038274 -0.931990 1.109765   |              |
| C                          | 3.282659 0.934550 0.036321    |              |
| N                          | 3.073475 -1.340615 -0.957991  |              |
| H                          | 2.975448 -2.330040 -0.727462  |              |
| H                          | 2.955938 1.542149 0.877707    |              |
| H                          | 2.925711 1.402659 -0.883505   |              |
| S                          | 5.120669 0.954321 -0.085916   |              |
| H                          | 2.432206 -1.151389 -1.738759  |              |
| H                          | 4.045712 -1.169752 -1.237976  |              |
| H                          | 5.360652 0.469024 1.149550    |              |
| 28                         |                               |              |
| Dimer 63 of the z...z type |                               |              |
| C                          | -3.618281 0.174954 0.163839   |              |
| C                          | -2.283048 -0.360039 0.771521  |              |
| O                          | -3.897134 -0.258968 -0.984750 |              |
| O                          | -4.222273 1.011988 0.859906   |              |
| H                          | -2.429483 -0.588024 1.826578  |              |
| C                          | -1.181801 0.695332 0.670160   |              |
| N                          | -1.899483 -1.630277 0.071463  |              |
| H                          | -0.855958 -1.819156 0.069473  |              |
| H                          | -0.265605 0.336489 1.137202   |              |
| H                          | -1.527620 1.576640 1.207846   |              |
| S                          | -0.723860 1.202680 -1.056461  |              |
| H                          | -2.375892 -2.427605 0.490828  |              |
| H                          | -2.250553 -1.552366 -0.891306 |              |
| H                          | -1.875898 0.836325 -1.660227  |              |
| C                          | 1.625817 -1.394456 0.508105   |              |
| C                          | 2.786518 -0.874651 -0.391158  |              |
| O                          | 0.728479 -2.016426 -0.134881  |              |
| O                          | 1.683512 -1.161451 1.721755   |              |
| H                          | 3.468914 -1.712076 -0.557737  |              |
| C                          | 3.579039 0.293513 0.177549    |              |
| N                          | 2.191640 -0.545161 -1.736665  |              |
| H                          | 2.895756 -0.290441 -2.430763  |              |
| H                          | 4.377356 0.586787 -0.505970   |              |
| H                          | 4.031548 -0.033247 1.111437   |              |
| S                          | 2.593594 1.818332 0.491373    |              |
| H                          | 1.658474 -1.356035 -2.064170  |              |
| H                          | 1.509133 0.222591 -1.649440   |              |
| H                          | 1.888853 1.302909 1.517742    |              |
| 28                         |                               |              |
| Dimer 64 of the z...z type |                               |              |
| C                          | 3.594856 -1.124374 -0.063674  |              |
| C                          | 2.202504 -0.423999 -0.053317  |              |
| O                          | 3.909121 -1.726765 0.991349   |              |
| O                          | 4.233688 -1.030761 -1.134806  |              |
| H                          | 1.478305 -1.113585 -0.493721  |              |
| C                          | 2.144868 0.887239 -0.827248   |              |
| N                          | 1.743642 -0.211680 1.356264   |              |

| Nov 11, 22 15:56           | dimers_structures.xyz         | Page 272/325 |
|----------------------------|-------------------------------|--------------|
| H                          | 0.721713 0.070335 1.349847    |              |
| H                          | 1.145834 1.322144 -0.763945   |              |
| H                          | 2.384281 0.687589 -1.868602   |              |
| S                          | 3.299316 2.176809 -0.182791   |              |
| H                          | 1.901289 -1.067332 1.890689   |              |
| H                          | 2.299586 0.526349 1.794734    |              |
| H                          | 4.425638 1.493011 -0.473477   |              |
| C                          | -1.298721 -0.337305 0.203972  |              |
| C                          | -2.683163 0.016234 -0.398996  |              |
| O                          | -0.851617 -1.478805 -0.017690 |              |
| O                          | -0.780863 0.583814 0.888188   |              |
| H                          | -2.615530 0.952250 -0.951403  |              |
| C                          | -3.726623 0.124255 0.713185   |              |
| N                          | -3.068628 -1.058170 -1.379705 |              |
| H                          | -2.563212 -0.957291 -2.260732 |              |
| H                          | -3.399769 0.895783 1.406945   |              |
| H                          | -3.802183 -0.818038 1.259889  |              |
| S                          | -5.433324 0.483672 0.118907   |              |
| H                          | -2.802854 -1.970956 -0.992971 |              |
| H                          | -4.075345 -1.033085 -1.577224 |              |
| H                          | -5.163664 1.701928 -0.393645  |              |
| 28                         |                               |              |
| Dimer 65 of the z...z type |                               |              |
| C                          | -2.144390 -1.569320 -0.011624 |              |
| C                          | -2.791625 -0.345058 -0.730892 |              |
| O                          | -2.934225 -2.377990 0.508444  |              |
| O                          | -0.888353 -1.624435 -0.043203 |              |
| H                          | -2.860817 -0.592795 -1.792462 |              |
| C                          | -2.043801 0.971825 -0.568991  |              |
| N                          | -4.203498 -0.230037 -0.219066 |              |
| H                          | -4.841121 0.209251 -0.883565  |              |
| H                          | -2.597481 1.786971 -1.037831  |              |
| H                          | -1.076710 0.915739 -1.060215  |              |
| S                          | -1.809074 1.477570 1.186709   |              |
| H                          | -4.515000 -1.184994 0.011340  |              |
| H                          | -4.215996 0.307841 0.654865   |              |
| H                          | -1.007678 0.445351 1.519789   |              |
| C                          | 1.536807 1.732036 -0.266633   |              |
| C                          | 1.880257 0.226026 -0.012546   |              |
| O                          | 1.018747 1.990533 -1.382669   |              |
| O                          | 1.846046 2.503753 0.659857    |              |
| H                          | 1.402280 -0.096667 0.912182   |              |
| C                          | 3.394550 0.057012 0.088306    |              |
| N                          | 1.306256 -0.594509 -1.126236  |              |
| H                          | 0.364036 -0.970837 -0.839516  |              |
| H                          | 3.757465 0.693150 0.892166    |              |
| H                          | 3.875501 0.368884 -0.841502   |              |
| S                          | 3.951360 -1.681421 0.358873   |              |
| H                          | 1.188207 0.039601 -1.927717   |              |
| H                          | 1.903267 -1.387794 -1.369429  |              |
| H                          | 3.299657 -1.870275 1.524548   |              |
| 28                         |                               |              |
| Dimer 66 of the z...z type |                               |              |
| C                          | 3.720036 -0.076522 0.226714   |              |
| C                          | 2.418656 -0.876357 -0.087182  |              |
| O                          | 3.828883 0.362812 1.395517    |              |
| O                          | 4.497593 0.045754 -0.743233   |              |
| H                          | 2.692133 -1.896507 -0.362718  |              |
| C                          | 1.625538 -0.265993 -1.239953  |              |
| N                          | 1.563969 -0.970301 1.143428   |              |
| H                          | 0.619500 -1.371635 0.907549   |              |
| H                          | 0.742591 -0.867771 -1.458502  |              |
| H                          | 2.267802 -0.236300 -2.117035  |              |
| S                          | 0.986378 1.430627 -0.894701   |              |
| H                          | 2.024200 -1.537215 1.854153   |              |
| H                          | 1.461184 -0.036341 1.546418   |              |
| H                          | 2.183331 2.034389 -0.748448   |              |
| C                          | -1.932714 -1.801801 0.006064  |              |
| C                          | -2.236520 -0.314653 -0.346248 |              |

| Nov 11, 22 15:56           | dimers_structures.xyz         | Page 273/325 |
|----------------------------|-------------------------------|--------------|
| O                          | -2.902799 -2.578412 0.020436  |              |
| O                          | -0.726336 -2.048729 0.263874  |              |
| H                          | -1.560123 0.034010 -1.123875  |              |
| C                          | -2.110328 0.559797 0.901958   |              |
| N                          | -3.630385 -0.234919 -0.906142 |              |
| H                          | -3.653818 -0.521447 -1.885580 |              |
| H                          | -1.087296 0.495043 1.263996   |              |
| H                          | -2.775947 0.201483 1.689507   |              |
| S                          | -2.558467 2.326254 0.641815   |              |
| H                          | -4.223700 -0.896657 -0.390729 |              |
| H                          | -4.004033 0.718771 -0.837835  |              |
| H                          | -1.554217 2.608394 -0.212599  |              |
| 28                         |                               |              |
| Dimer 67 of the z...z type |                               |              |
| C                          | 3.811210 -0.244423 0.162187   |              |
| C                          | 2.435067 0.084565 0.823801    |              |
| O                          | 4.422857 0.732438 -0.331943   |              |
| O                          | 4.157217 -1.443672 0.222555   |              |
| H                          | 2.610038 0.195972 1.897452    |              |
| C                          | 1.370238 -0.986273 0.619906   |              |
| N                          | 1.943468 1.412793 0.336832    |              |
| H                          | 1.098384 1.724733 0.870443    |              |
| H                          | 0.431325 -0.681287 1.080726   |              |
| H                          | 1.710637 -1.906577 1.087318   |              |
| S                          | 0.990279 -1.328718 -1.153506  |              |
| H                          | 2.707363 2.089906 0.363995    |              |
| H                          | 1.625326 1.344240 -0.635668   |              |
| H                          | 2.171433 -1.924573 -1.417702  |              |
| C                          | -1.154552 1.509951 0.148017   |              |
| C                          | -2.573641 0.881681 0.162976   |              |
| O                          | -0.666680 1.767829 -0.972868  |              |
| O                          | -0.612894 1.622089 1.276196   |              |
| H                          | -3.197033 1.369249 0.909808   |              |
| C                          | -2.453123 -0.615798 0.455356  |              |
| N                          | -3.202543 1.105345 -1.185057  |              |
| H                          | -3.617450 2.035492 -1.255498  |              |
| H                          | -1.990497 -0.731708 1.433213  |              |
| H                          | -1.818182 -1.102318 -0.287878 |              |
| S                          | -4.047137 -1.535256 0.400100  |              |
| H                          | -2.455615 1.054284 -1.891345  |              |
| H                          | -3.933972 0.411625 -1.376990  |              |
| H                          | -4.633675 -0.890121 1.429215  |              |
| 28                         |                               |              |
| Dimer 68 of the z...z type |                               |              |
| C                          | 2.687178 -1.356502 -0.087673  |              |
| C                          | 1.999929 0.007510 -0.391586   |              |
| O                          | 2.593621 -1.778178 1.088862   |              |
| O                          | 3.278891 -1.865553 -1.065017  |              |
| H                          | 1.235741 -0.141171 -1.155993  |              |
| C                          | 2.994211 1.051099 -0.891049   |              |
| N                          | 1.271229 0.482227 0.825619    |              |
| H                          | 0.844734 1.396158 0.668035    |              |
| H                          | 2.492726 1.993365 -1.119819   |              |
| H                          | 3.456044 0.672925 -1.800654   |              |
| S                          | 4.313305 1.484316 0.326679    |              |
| H                          | 0.475402 -0.179748 1.008971   |              |
| H                          | 1.901481 0.510889 1.627939    |              |
| H                          | 4.901171 0.270458 0.348296    |              |
| C                          | -1.556941 -0.288090 -0.184881 |              |
| C                          | -2.951275 -0.796851 -0.649618 |              |
| O                          | -0.999726 -0.987632 0.711220  |              |
| O                          | -1.118328 0.730768 -0.742166  |              |
| H                          | -2.793228 -1.411813 -1.538480 |              |
| C                          | -3.936094 0.319178 -0.973893  |              |
| N                          | -3.489233 -1.710071 0.419792  |              |
| H                          | -4.169278 -2.386234 0.070497  |              |
| H                          | -4.890393 -0.088374 -1.309435 |              |
| H                          | -3.512013 0.924130 -1.771646  |              |
| S                          | -4.322448 1.395858 0.473158   |              |

| Nov 11, 22 15:56           | dimers_structures.xyz         | Page 274/325 |
|----------------------------|-------------------------------|--------------|
| H                          | -2.686042 -2.192446 0.844720  |              |
| H                          | -3.933203 -1.151029 1.158030  |              |
| H                          | -3.075647 1.895713 0.598581   |              |
| 28                         |                               |              |
| Dimer 69 of the z...z type |                               |              |
| C                          | 4.037869 0.451727 -0.498397   |              |
| C                          | 2.854915 -0.230296 0.276548   |              |
| O                          | 4.243970 1.657337 -0.214538   |              |
| O                          | 4.662611 -0.291958 -1.280250  |              |
| H                          | 3.306261 -0.843954 1.058493   |              |
| C                          | 1.985300 -1.088789 -0.631680  |              |
| N                          | 2.054148 0.839421 0.954573    |              |
| H                          | 1.560348 0.516881 1.787288    |              |
| H                          | 2.631749 -1.768896 -1.179612  |              |
| H                          | 1.443624 -0.466389 -1.345104  |              |
| S                          | 0.674312 -2.062009 0.231785   |              |
| H                          | 2.700054 1.604072 1.180070    |              |
| H                          | 1.304656 1.213821 0.320823    |              |
| H                          | 1.489001 -2.798544 1.013244   |              |
| C                          | -0.957746 0.857230 0.451716   |              |
| C                          | -2.185789 0.026310 0.001573   |              |
| O                          | -0.818838 1.032448 1.680135   |              |
| O                          | -0.220518 1.268833 -0.479868  |              |
| H                          | -1.904779 -0.638789 -0.812305 |              |
| C                          | -3.320102 0.956223 -0.423619  |              |
| N                          | -2.608314 -0.831252 1.161128  |              |
| H                          | -1.958909 -1.611153 1.285629  |              |
| H                          | -2.962457 1.577145 -1.243126  |              |
| H                          | -3.606706 1.610190 0.402295   |              |
| S                          | -4.867071 0.086193 -0.920938  |              |
| H                          | -2.557669 -0.265002 2.017037  |              |
| H                          | -3.554825 -1.203593 1.030984  |              |
| H                          | -4.351516 -0.537633 -1.999866 |              |
| 28                         |                               |              |
| Dimer 70 of the z...z type |                               |              |
| C                          | 0.690865 -1.200923 0.706090   |              |
| C                          | 2.213090 -1.017186 0.472956   |              |
| O                          | 0.065499 -1.877761 -0.131290  |              |
| O                          | 0.239915 -0.555846 1.687629   |              |
| H                          | 2.766284 -1.187703 1.394454   |              |
| C                          | 2.456493 0.400360 -0.050523   |              |
| N                          | 2.668232 -2.036899 -0.534332  |              |
| H                          | 2.823621 -2.947904 -0.100789  |              |
| H                          | 2.104807 1.101763 0.702507    |              |
| H                          | 1.887698 0.574215 -0.966516   |              |
| S                          | 4.206384 0.764013 -0.489923   |              |
| H                          | 1.916630 -2.158976 -1.225415  |              |
| H                          | 3.538219 -1.744465 -0.993575  |              |
| H                          | 4.707439 0.631362 0.755325    |              |
| C                          | -3.321340 -0.640606 -0.622945 |              |
| C                          | -2.646686 0.606024 0.044975   |              |
| O                          | -3.744967 -1.515302 0.173841  |              |
| O                          | -3.399843 -0.607888 -1.867178 |              |
| H                          | -3.402993 1.393016 0.076439   |              |
| C                          | -1.425300 1.093847 -0.722117  |              |
| N                          | -2.316144 0.254657 1.465422   |              |
| H                          | -2.987920 -0.475859 1.736215  |              |
| H                          | -1.737291 1.376843 -1.723935  |              |
| H                          | -0.696163 0.291788 -0.816632  |              |
| S                          | -0.536557 2.503000 0.071569   |              |
| H                          | -1.335463 -0.145025 1.559339  |              |
| H                          | -2.384918 1.056571 2.088993   |              |
| H                          | -1.469373 3.443126 -0.185009  |              |
| 28                         |                               |              |
| Dimer 71 of the z...z type |                               |              |
| C                          | 1.525651 0.352699 1.133997    |              |
| C                          | 2.436294 0.637853 -0.098199   |              |
| O                          | 1.923886 0.802872 2.223270    |              |
| O                          | 0.466381 -0.275610 0.876591   |              |

| Nov 11, 22 15:56 dimers_structures.xyz Page 275/325 |           |           |           |
|-----------------------------------------------------|-----------|-----------|-----------|
| H                                                   | 2.129528  | 1.610098  | -0.489767 |
| C                                                   | 2.359426  | -0.395293 | -1.212591 |
| N                                                   | 3.841975  | 0.804211  | 0.410982  |
| H                                                   | 4.428243  | 1.373854  | -0.200129 |
| H                                                   | 3.017091  | -0.124834 | -2.039478 |
| H                                                   | 1.336735  | -0.423472 | -1.580246 |
| S                                                   | 2.869790  | -2.086261 | -0.686120 |
| H                                                   | 3.775147  | 1.234521  | 1.344096  |
| H                                                   | 4.284439  | -0.115259 | 0.523350  |
| H                                                   | 1.848808  | -2.258049 | 0.178713  |
| C                                                   | -3.586985 | -0.890729 | 0.162607  |
| C                                                   | -2.740120 | 0.422277  | 0.045532  |
| O                                                   | -3.683223 | -1.372674 | 1.319587  |
| O                                                   | -4.095461 | -1.293484 | -0.902005 |
| H                                                   | -3.444577 | 1.246679  | -0.075858 |
| C                                                   | -1.771609 | 0.383916  | -1.129481 |
| N                                                   | -2.021124 | 0.635344  | 1.348259  |
| H                                                   | -2.556501 | 0.106290  | 2.051209  |
| H                                                   | -2.338617 | 0.227120  | -2.043232 |
| H                                                   | -1.063958 | -0.435523 | -1.010345 |
| S                                                   | -0.726148 | 1.895800  | -1.293156 |
| H                                                   | -1.041654 | 0.246503  | 1.310272  |
| H                                                   | -1.958344 | 1.618690  | 1.603939  |
| H                                                   | -1.689182 | 2.710702  | -1.769541 |
| 28                                                  |           |           |           |
| Dimer 72 of the z...z type                          |           |           |           |
| C                                                   | -1.309959 | 1.466355  | 0.178024  |
| C                                                   | -1.826626 | 0.211348  | 0.947979  |
| O                                                   | -1.796660 | 2.558099  | 0.525305  |
| O                                                   | -0.436959 | 1.251789  | -0.700883 |
| H                                                   | -1.111363 | 0.006688  | 1.748323  |
| C                                                   | -2.002622 | -1.042734 | 0.102260  |
| N                                                   | -3.119537 | 0.606442  | 1.611570  |
| H                                                   | -3.309921 | 0.087702  | 2.469109  |
| H                                                   | -2.443937 | -1.844475 | 0.696958  |
| H                                                   | -1.030739 | -1.393531 | -0.232654 |
| S                                                   | -3.126667 | -0.809637 | -1.339540 |
| H                                                   | -3.055840 | 1.618163  | 1.801293  |
| H                                                   | -3.902954 | 0.469331  | 0.963548  |
| H                                                   | -2.337789 | 0.078382  | -1.979127 |
| C                                                   | 1.688361  | -1.974459 | 0.548439  |
| C                                                   | 2.285896  | -0.773157 | -0.258619 |
| O                                                   | 0.833957  | -2.663714 | -0.064465 |
| O                                                   | 2.147841  | -2.131641 | 1.695805  |
| H                                                   | 3.263571  | -1.091642 | -0.625635 |
| C                                                   | 2.425445  | 0.490534  | 0.580646  |
| N                                                   | 1.420133  | -0.525697 | -1.460404 |
| H                                                   | 1.058526  | -1.433447 | -1.770436 |
| H                                                   | 3.047296  | 0.267796  | 1.443488  |
| H                                                   | 1.449810  | 0.823507  | 0.933949  |
| S                                                   | 3.115429  | 1.933976  | -0.339499 |
| H                                                   | 0.603257  | 0.086309  | -1.196207 |
| H                                                   | 1.928864  | -0.064471 | -2.213460 |
| H                                                   | 4.368454  | 1.451479  | -0.471151 |
| 28                                                  |           |           |           |
| Dimer 73 of the z...z type                          |           |           |           |
| C                                                   | -1.914779 | -1.355391 | 0.492624  |
| C                                                   | -2.915697 | -0.878034 | -0.600310 |
| O                                                   | -2.364069 | -1.508182 | 1.643496  |
| O                                                   | -0.746131 | -1.539671 | 0.066973  |
| H                                                   | -3.133163 | -1.730936 | -1.245381 |
| C                                                   | -2.372282 | 0.269850  | -1.447871 |
| N                                                   | -4.200150 | -0.497705 | 0.085258  |
| H                                                   | -5.028862 | -0.655294 | -0.488240 |
| H                                                   | -3.066422 | 0.529876  | -2.247903 |
| H                                                   | -1.430366 | -0.052813 | -1.885336 |
| S                                                   | -2.115942 | 1.829615  | -0.496750 |
| H                                                   | -4.249229 | -1.042433 | 0.958163  |
| H                                                   | -4.167792 | 0.493810  | 0.353690  |

| Nov 11, 22 15:56 dimers_structures.xyz Page 276/325 |           |           |           |
|-----------------------------------------------------|-----------|-----------|-----------|
| H                                                   | -1.211672 | 1.337666  | 0.373910  |
| C                                                   | 3.114318  | -1.206739 | -0.638717 |
| C                                                   | 2.084197  | -0.170953 | -0.079941 |
| O                                                   | 3.467210  | -2.111555 | 0.158597  |
| O                                                   | 3.489480  | -0.993497 | -1.808596 |
| H                                                   | 1.262599  | -0.068211 | -0.787267 |
| C                                                   | 2.774671  | 1.172707  | 0.135502  |
| N                                                   | 1.508313  | -0.713946 | 1.192035  |
| H                                                   | 0.598993  | -1.194989 | 0.959007  |
| H                                                   | 3.224830  | 1.483318  | -0.805010 |
| H                                                   | 3.566481  | 1.084408  | 0.882600  |
| S                                                   | 1.661343  | 2.506061  | 0.760738  |
| H                                                   | 2.187581  | -1.399796 | 1.550317  |
| H                                                   | 1.317399  | 0.014221  | 1.882337  |
| H                                                   | 0.851582  | 2.546489  | -0.317235 |
| 28                                                  |           |           |           |
| Dimer 74 of the z...z type                          |           |           |           |
| C                                                   | 1.209018  | 1.621828  | 0.015778  |
| C                                                   | 2.362037  | 0.898029  | 0.782738  |
| O                                                   | 0.134029  | 1.709244  | 0.667682  |
| O                                                   | 1.486854  | 2.088055  | -1.102201 |
| H                                                   | 2.874590  | 1.680699  | 1.349445  |
| C                                                   | 3.405868  | 0.204454  | -0.085698 |
| N                                                   | 1.750124  | -0.029318 | 1.795544  |
| H                                                   | 2.454897  | -0.563788 | 2.303191  |
| H                                                   | 4.304514  | -0.009366 | 0.496003  |
| H                                                   | 3.666039  | 0.899108  | -0.882216 |
| S                                                   | 2.901698  | -1.415746 | -0.807681 |
| H                                                   | 1.202998  | 0.521466  | 2.457767  |
| H                                                   | 1.053576  | -0.691613 | 1.350651  |
| H                                                   | 1.620697  | -1.080223 | -1.136518 |
| C                                                   | -0.853242 | -1.179557 | -0.230849 |
| C                                                   | -2.404321 | -1.265605 | -0.290394 |
| O                                                   | -0.334974 | -1.477549 | 0.884224  |
| O                                                   | -0.287611 | -0.863569 | -1.287540 |
| H                                                   | -2.650531 | -2.201719 | -0.795093 |
| C                                                   | -3.051850 | -0.100637 | -1.036210 |
| N                                                   | -2.921251 | -1.370747 | 1.118353  |
| H                                                   | -3.770982 | -1.928628 | 1.200566  |
| H                                                   | -4.113472 | -0.290345 | -1.198790 |
| H                                                   | -2.557723 | -0.011520 | -2.001203 |
| S                                                   | -2.965065 | 1.501079  | -0.126723 |
| H                                                   | -2.159915 | -1.771581 | 1.685725  |
| H                                                   | -3.110710 | -0.422359 | 1.473486  |
| H                                                   | -1.600222 | 1.577237  | 0.009576  |
| 28                                                  |           |           |           |
| Dimer 75 of the z...z type                          |           |           |           |
| C                                                   | -1.464775 | -0.732398 | 0.233866  |
| C                                                   | -3.012247 | -0.899531 | 0.212713  |
| O                                                   | -0.955152 | -0.684283 | 1.395267  |
| O                                                   | -0.890359 | -0.680421 | -0.859244 |
| H                                                   | -3.220910 | -1.967622 | 0.120956  |
| C                                                   | -3.697018 | -0.151079 | -0.923902 |
| N                                                   | -3.541753 | -0.468305 | 1.554473  |
| H                                                   | -4.430008 | -0.907274 | 1.798580  |
| H                                                   | -4.775707 | -0.311296 | -0.903726 |
| H                                                   | -3.302907 | -0.528573 | -1.864420 |
| S                                                   | -3.453421 | 1.676192  | -0.848498 |
| H                                                   | -2.820283 | -0.698582 | 2.251756  |
| H                                                   | -3.663816 | 0.551174  | 1.566739  |
| H                                                   | -2.121100 | 1.637690  | -1.057498 |
| C                                                   | 2.427708  | -1.592311 | -0.646262 |
| C                                                   | 2.146440  | -0.159277 | -0.096401 |
| O                                                   | 2.504199  | -2.507995 | 0.210755  |
| O                                                   | 2.581565  | -1.657900 | -1.883483 |
| H                                                   | 1.324499  | 0.271115  | -0.664359 |
| C                                                   | 3.408413  | 0.690376  | -0.218434 |
| N                                                   | 1.697619  | -0.265736 | 1.325750  |
| H                                                   | 0.652532  | -0.459914 | 1.371716  |

| Nov 11, 22 15:56 dimers_structures.xyz Page 277/325 |           |           |           |
|-----------------------------------------------------|-----------|-----------|-----------|
| H                                                   | 3.717276  | 0.701081  | -1.261620 |
| H                                                   | 4.220284  | 0.266557  | 0.377117  |
| S                                                   | 3.218233  | 2.423149  | 0.392392  |
| H                                                   | 2.183797  | -1.065741 | 1.744673  |
| H                                                   | 1.891624  | 0.590544  | 1.849400  |
| H                                                   | 2.243528  | 2.779774  | -0.469025 |
| 28                                                  |           |           |           |
| Dimer 76 of the z...z type                          |           |           |           |
| C                                                   | -0.815054 | 1.417838  | -0.067363 |
| C                                                   | -1.874087 | 0.273821  | -0.008303 |
| O                                                   | -0.502473 | 1.940125  | 1.028478  |
| O                                                   | -0.413703 | 1.697487  | -1.217395 |
| H                                                   | -1.549619 | -0.542155 | -0.651228 |
| C                                                   | -3.230593 | 0.814041  | -0.450555 |
| N                                                   | -1.930253 | -0.268411 | 1.386199  |
| H                                                   | -1.052433 | -0.834134 | 1.560619  |
| H                                                   | -3.125035 | 1.235679  | -1.448377 |
| H                                                   | -3.569243 | 1.604439  | 0.222763  |
| S                                                   | -4.588541 | -0.437772 | -0.449448 |
| H                                                   | -1.923512 | 0.516485  | 2.043659  |
| H                                                   | -2.760129 | -0.846963 | 1.533176  |
| H                                                   | -4.057319 | -1.238983 | -1.395417 |
| C                                                   | 0.963781  | -1.549335 | 0.395152  |
| C                                                   | 2.416880  | -1.041015 | 0.209880  |
| O                                                   | 0.386855  | -1.989767 | -0.617215 |
| O                                                   | 0.502873  | -1.384185 | 1.554848  |
| H                                                   | 3.047200  | -1.369604 | 1.033825  |
| C                                                   | 2.389767  | 0.484201  | 0.109042  |
| N                                                   | 2.971620  | -1.630462 | -1.059460 |
| H                                                   | 3.281018  | -2.593967 | -0.925832 |
| H                                                   | 1.914033  | 0.882160  | 1.002707  |
| H                                                   | 1.783735  | 0.799969  | -0.742538 |
| S                                                   | 4.042678  | 1.253261  | -0.144385 |
| H                                                   | 2.214091  | -1.650421 | -1.754362 |
| H                                                   | 3.765051  | -1.081140 | -1.407359 |
| H                                                   | 4.583835  | 0.856328  | 1.025664  |
| 28                                                  |           |           |           |
| Dimer 77 of the z...z type                          |           |           |           |
| C                                                   | 1.634621  | 1.358613  | -0.111092 |
| C                                                   | 2.923489  | 0.867576  | -0.829795 |
| O                                                   | 1.772204  | 2.228976  | 0.767599  |
| O                                                   | 0.575748  | 0.811953  | -0.515354 |
| H                                                   | 2.970183  | 1.363754  | -1.801095 |
| C                                                   | 2.970339  | -0.643642 | -1.031767 |
| N                                                   | 4.101438  | 1.352083  | -0.028969 |
| H                                                   | 4.940496  | 1.498039  | -0.590916 |
| H                                                   | 3.883160  | -0.940387 | -1.549851 |
| H                                                   | 2.114617  | -0.930921 | -1.638482 |
| S                                                   | 2.957542  | -1.594373 | 0.548505  |
| H                                                   | 3.815220  | 2.226632  | 0.433524  |
| H                                                   | 4.314875  | 0.676921  | 0.714985  |
| H                                                   | 1.720856  | -1.212751 | 0.932646  |
| C                                                   | -3.940501 | 0.714915  | -0.221021 |
| C                                                   | -2.509498 | 0.080726  | -0.172448 |
| O                                                   | -4.088149 | 1.766460  | 0.451634  |
| O                                                   | -4.763732 | 0.122089  | -0.945767 |
| H                                                   | -2.025874 | 0.301766  | -1.126248 |
| C                                                   | -2.547294 | -1.425371 | 0.041924  |
| N                                                   | -1.694736 | 0.785818  | 0.869259  |
| H                                                   | -2.190313 | 1.669161  | 1.058738  |
| H                                                   | -3.097048 | -1.868620 | -0.784559 |
| H                                                   | -3.069825 | -1.671017 | 0.969209  |
| S                                                   | -0.880267 | -2.216145 | 0.194601  |
| H                                                   | -1.636776 | 0.258648  | 1.740048  |
| H                                                   | -0.721445 | 0.942159  | 0.485911  |
| H                                                   | -0.256943 | -1.463127 | -0.735355 |
| 28                                                  |           |           |           |
| Dimer 78 of the z...z type                          |           |           |           |
| C                                                   | -1.171545 | -0.269341 | -0.298230 |

| Nov 11, 22 15:56 dimers_structures.xyz Page 278/325 |           |           |           |
|-----------------------------------------------------|-----------|-----------|-----------|
| C                                                   | -2.477377 | -0.096220 | -1.125253 |
| O                                                   | -0.765687 | -1.433961 | -0.125971 |
| O                                                   | -0.646566 | 0.805861  | 0.091361  |
| H                                                   | -2.182013 | 0.136429  | -2.150491 |
| C                                                   | -3.404393 | 0.996457  | -0.606123 |
| N                                                   | -3.163204 | -1.435051 | -1.160923 |
| H                                                   | -3.739840 | -1.572457 | -1.991309 |
| H                                                   | -4.301055 | 1.073938  | -1.222176 |
| H                                                   | -2.868862 | 1.941865  | -0.645366 |
| S                                                   | -3.994345 | 0.697004  | 1.115352  |
| H                                                   | -2.423721 | -2.151009 | -1.108748 |
| H                                                   | -3.751626 | -1.548129 | -0.327035 |
| H                                                   | -2.778509 | 0.806559  | 1.689868  |
| C                                                   | 2.936998  | 1.632591  | -0.420728 |
| C                                                   | 2.746606  | 0.318517  | 0.408818  |
| O                                                   | 2.465589  | 2.673083  | 0.098082  |
| O                                                   | 3.574893  | 1.505786  | -1.487279 |
| H                                                   | 3.677180  | 0.153646  | 0.957363  |
| C                                                   | 2.429567  | -0.896886 | -0.452999 |
| N                                                   | 1.664891  | 0.534230  | 1.422651  |
| H                                                   | 1.833733  | 1.415636  | 1.909267  |
| H                                                   | 3.194558  | -0.987632 | -1.219232 |
| H                                                   | 1.459806  | -0.784903 | -0.935379 |
| S                                                   | 2.307729  | -2.477469 | 0.496094  |
| H                                                   | 0.720903  | 0.619415  | 0.931852  |
| H                                                   | 1.622558  | -0.235779 | 2.091478  |
| H                                                   | 3.625970  | -2.591247 | 0.762215  |
| 28                                                  |           |           |           |
| Dimer 79 of the z...z type                          |           |           |           |
| C                                                   | 4.056946  | -0.706436 | -0.005055 |
| C                                                   | 2.532982  | -0.654430 | -0.351070 |
| O                                                   | 4.350650  | -1.312102 | 1.054830  |
| O                                                   | 4.814572  | -0.163529 | -0.836120 |
| H                                                   | 2.339340  | -1.473148 | -1.049461 |
| C                                                   | 2.080349  | 0.648911  | -0.997783 |
| N                                                   | 1.733794  | -0.948326 | 0.879409  |
| H                                                   | 0.780485  | -1.321312 | 0.637187  |
| H                                                   | 1.007216  | 0.638076  | -1.182270 |
| H                                                   | 2.609334  | 0.771360  | -1.939588 |
| S                                                   | 2.380364  | 2.133848  | 0.055630  |
| H                                                   | 2.285679  | -1.584343 | 1.463748  |
| H                                                   | 1.573067  | -0.084285 | 1.405533  |
| C                                                   | 3.726023  | 2.067068  | -0.019029 |
| H                                                   | -1.249618 | -0.255861 | 0.161536  |
| C                                                   | -2.672623 | -0.016545 | -0.405681 |
| O                                                   | -0.802290 | -1.434726 | 0.043556  |
| O                                                   | -0.702205 | 0.721967  | 0.693505  |
| H                                                   | -2.671847 | 0.878509  | -1.025369 |
| C                                                   | -3.670060 | 0.127560  | 0.744047  |
| N                                                   | -3.051072 | -1.174523 | -1.290292 |
| H                                                   | -2.571206 | -1.125386 | -2.190160 |
| H                                                   | -3.346430 | 0.958437  | 1.367755  |
| H                                                   | -3.681979 | -0.776115 | 1.357049  |
| S                                                   | -5.414677 | 0.380102  | 0.207930  |
| H                                                   | -2.748746 | -2.046867 | -0.842163 |
| H                                                   | -4.062624 | -1.193974 | -1.461845 |
| H                                                   | -5.222032 | 1.576655  | -0.384294 |
| 28                                                  |           |           |           |
| Dimer 80 of the z...z type                          |           |           |           |
| C                                                   | -2.476739 | 1.763535  | -0.321611 |
| C                                                   | -2.339628 | 0.227943  | -0.085277 |
| O                                                   | -2.581972 | 2.471969  | 0.709110  |
| O                                                   | -2.502395 | 2.107722  | -1.522356 |
| H                                                   | -1.558626 | -0.175673 | -0.726833 |
| C                                                   | -3.673835 | -0.453306 | -0.378894 |
| N                                                   | -1.902332 | -0.013401 | 1.323210  |
| H                                                   | -0.871160 | 0.221618  | 1.390095  |
| H                                                   | -3.963736 | -0.219670 | -1.401554 |
| H                                                   | -4.451720 | -0.083765 | 0.292804  |

| Nov 11, 22 15:56           | dimers_structures.xyz |           | Page 279/325 |
|----------------------------|-----------------------|-----------|--------------|
| S                          | -3.659090             | -2.284713 | -0.140501    |
| H                          | -2.421098             | 0.614763  | 1.942639     |
| H                          | -2.043778             | -0.988202 | 1.596739     |
| H                          | -2.725004             | -2.552070 | -1.075915    |
| C                          | 1.122311              | -0.210268 | 0.213864     |
| C                          | 2.530866              | 0.093589  | -0.359194    |
| O                          | 0.695307              | 0.620908  | 1.070404     |
| O                          | 0.572127              | -1.243001 | -0.191491    |
| H                          | 2.529952              | -0.048963 | -1.437948    |
| C                          | 3.558880              | -0.825573 | 0.302701     |
| N                          | 2.865563              | 1.537096  | -0.090109    |
| H                          | 2.415723              | 2.156632  | -0.765337    |
| H                          | 3.277021              | -1.855130 | 0.091051     |
| H                          | 3.557384              | -0.684528 | 1.385382     |
| S                          | 5.297638              | -0.522485 | -0.225865    |
| H                          | 2.496931              | 1.785040  | 0.836755     |
| H                          | 3.878751              | 1.696502  | -0.130717    |
| H                          | 5.124302              | -0.853545 | -1.521893    |
| 28                         |                       |           |              |
| Dimer 81 of the z...z type |                       |           |              |
| C                          | 2.166052              | 0.653868  | 1.077943     |
| C                          | 2.778707              | 0.440410  | -0.341266    |
| O                          | 2.879134              | 0.333425  | 2.048207     |
| O                          | 1.014704              | 1.150759  | 1.066774     |
| H                          | 3.075973              | 1.420660  | -0.718370    |
| C                          | 1.815639              | -0.204333 | -1.331924    |
| N                          | 4.035594              | -0.372258 | -0.175871    |
| H                          | 4.762481              | -0.142175 | -0.853027    |
| H                          | 2.274293              | -0.294673 | -2.317634    |
| H                          | 0.930797              | 0.424515  | -1.419421    |
| S                          | 1.330012              | -1.926485 | -0.872326    |
| H                          | 4.364063              | -0.207241 | 0.788202     |
| H                          | 3.817070              | -1.372900 | -0.251179    |
| H                          | 0.827877              | -1.631701 | 0.344469     |
| C                          | -1.578917             | 1.654225  | -0.872555    |
| C                          | -1.713719             | 0.362322  | -0.010912    |
| O                          | -1.912039             | 2.722136  | -0.305649    |
| O                          | -1.186730             | 1.464595  | -2.043120    |
| H                          | -0.894910             | -0.309435 | -0.244615    |
| C                          | -3.047420             | -0.319253 | -0.292226    |
| N                          | -1.577964             | 0.733889  | 1.432261     |
| H                          | -0.563186             | 0.919203  | 1.606991     |
| H                          | -3.116337             | -0.518480 | -1.360334    |
| H                          | -3.880830             | 0.325652  | -0.006570    |
| S                          | -3.293669             | -1.890974 | 0.646553     |
| H                          | -2.097707             | 1.603481  | 1.589481     |
| H                          | -1.914635             | -0.005582 | 2.053197     |
| H                          | -2.252438             | -2.554130 | 0.102391     |
| 28                         |                       |           |              |
| Dimer 82 of the z...z type |                       |           |              |
| C                          | -2.369028             | -1.926355 | 0.118193     |
| C                          | -2.016891             | -0.405918 | 0.071153     |
| O                          | -2.877079             | -2.405352 | -0.926203    |
| O                          | -2.128952             | -2.486447 | 1.207419     |
| H                          | -1.003368             | -0.259581 | 0.436883     |
| C                          | -2.993055             | 0.378433  | 0.944231     |
| N                          | -2.045065             | 0.057048  | -1.350569    |
| H                          | -1.071365             | -0.032266 | -1.750584    |
| H                          | -2.902453             | 0.009787  | 1.963930     |
| H                          | -4.021807             | 0.227939  | 0.609914     |
| S                          | -2.726121             | 2.209018  | 0.906184     |
| H                          | -2.691196             | -0.559078 | -1.858337    |
| H                          | -2.327122             | 1.037126  | -1.422577    |
| H                          | -1.377430             | 2.164559  | 0.949351     |
| C                          | 1.053456              | 0.684973  | -1.063256    |
| C                          | 2.538734              | 0.466113  | -0.679198    |
| O                          | 0.449187              | 1.608143  | -0.478526    |
| O                          | 0.590609              | -0.152295 | -1.878598    |
| H                          | 3.142510              | 0.281298  | -1.565345    |

| Nov 11, 22 15:56           | dimers_structures.xyz |           | Page 280/325 |
|----------------------------|-----------------------|-----------|--------------|
| C                          | 2.623064              | -0.714044 | 0.292239     |
| N                          | 3.046986              | 1.720862  | -0.024764    |
| H                          | 3.318503              | 2.421297  | -0.715930    |
| H                          | 2.238548              | -1.596519 | -0.215064    |
| H                          | 2.002947              | -0.527596 | 1.171630     |
| S                          | 4.312270              | -1.041210 | 0.947972     |
| H                          | 2.276153              | 2.122499  | 0.526041     |
| H                          | 3.858242              | 1.526048  | 0.572891     |
| H                          | 4.878216              | -1.357411 | -0.234880    |
| 28                         |                       |           |              |
| Dimer 83 of the z...z type |                       |           |              |
| C                          | -1.211093             | 0.111643  | 0.356147     |
| C                          | -2.276249             | -0.806647 | -0.303067    |
| O                          | -0.821233             | -0.227778 | 1.498072     |
| O                          | -0.807153             | 1.066231  | -0.346874    |
| H                          | -1.724825             | -1.524484 | -0.914696    |
| C                          | -3.290956             | -0.074719 | -1.170024    |
| N                          | -2.941493             | -1.589334 | 0.796255     |
| H                          | -3.302454             | -2.492933 | 0.489491     |
| H                          | -4.001467             | -0.772050 | -1.615502    |
| H                          | -2.751229             | 0.433473  | -1.965497    |
| S                          | -4.301605             | 1.152222  | -0.234468    |
| H                          | -2.238165             | -1.711803 | 1.539688     |
| H                          | -3.714905             | -1.043657 | 1.193877     |
| H                          | -3.268613             | 1.966134  | 0.066701     |
| C                          | 3.690139              | 0.690824  | -0.269058    |
| C                          | 2.719802              | 0.258825  | 0.875912     |
| O                          | 3.587666              | 1.881474  | -0.649482    |
| O                          | 4.483140              | -0.194604 | -0.654423    |
| H                          | 3.287330              | 0.334842  | 1.808019     |
| C                          | 2.194705              | -1.168622 | 0.766441     |
| N                          | 1.607080              | 1.257929  | 0.984191     |
| H                          | 1.077101              | 1.147526  | 1.850903     |
| H                          | 1.429669              | -1.354279 | 1.520390     |
| H                          | 3.029118              | -1.847124 | 0.927550     |
| S                          | 1.401355              | -1.590726 | -0.843226    |
| H                          | 2.006378              | 2.196612  | 0.914382     |
| H                          | 0.882250              | 1.175451  | 0.235537     |
| H                          | 2.524860              | -1.463064 | -1.578059    |
| 28                         |                       |           |              |
| Dimer 84 of the z...z type |                       |           |              |
| C                          | 1.716185              | -0.828620 | -0.772107    |
| C                          | 1.797324              | -0.227052 | 0.664219     |
| O                          | 2.374965              | -1.865553 | -0.971829    |
| O                          | 0.977251              | -0.201840 | -1.575701    |
| H                          | 0.931695              | -0.603353 | 1.215621     |
| C                          | 1.816223              | 1.295561  | 0.704216     |
| N                          | 3.014239              | -0.811759 | 1.328669     |
| H                          | 2.927806              | -0.879198 | 2.342903     |
| H                          | 1.859698              | 1.659767  | 1.731285     |
| H                          | 0.904071              | 1.665943  | 0.242850     |
| S                          | 3.266969              | 2.037425  | -0.160511    |
| H                          | 3.156430              | -1.743726 | 0.911627     |
| H                          | 3.842817              | -0.248458 | 1.105145     |
| H                          | 2.923005              | 1.596289  | -1.388369    |
| C                          | -1.433346             | -1.654633 | 0.392386     |
| C                          | -1.808301             | -0.182239 | 0.032085     |
| O                          | -1.681228             | -2.504332 | -0.493212    |
| O                          | -0.957372             | -1.813079 | 1.537228     |
| H                          | -1.099030             | 0.504795  | 0.488596     |
| C                          | -3.221140             | 0.119476  | 0.522810     |
| N                          | -1.694759             | -0.013329 | -1.449432    |
| H                          | -0.673135             | -0.022718 | -1.686422    |
| H                          | -3.260682             | -0.051384 | 1.597392     |
| H                          | -3.941691             | -0.545303 | 0.042404     |
| S                          | -3.802007             | 1.830216  | 0.146194     |
| H                          | -2.133419             | -0.820779 | -1.902833    |
| H                          | -2.131055             | 0.854767  | -1.769197    |
| H                          | -2.892863             | 2.470208  | 0.909875     |

| Nov 11, 22 15:56           | dimers_structures.xyz         | Page 281/325 |
|----------------------------|-------------------------------|--------------|
| 28                         |                               |              |
| Dimer 85 of the z...z type |                               |              |
| C                          | 3.930235 -0.118931 0.357340   |              |
| C                          | 2.865759 -0.270703 -0.772671  |              |
| O                          | 3.880194 -0.960915 1.283836   |              |
| O                          | 4.705927 0.849350 0.206769    |              |
| H                          | 3.381476 -0.477903 -1.712220  |              |
| C                          | 2.031520 0.994181 -0.955643   |              |
| N                          | 1.978310 -1.447776 -0.488386  |              |
| H                          | 1.094760 -1.420500 -1.047683  |              |
| H                          | 1.289284 0.862991 -1.742218   |              |
| H                          | 2.699497 1.810011 -1.220515   |              |
| S                          | 1.066377 1.473435 0.542983    |              |
| H                          | 2.475674 -2.324859 -0.631608  |              |
| H                          | 1.688790 -1.434915 0.494025   |              |
| H                          | 2.080584 2.027158 1.235242    |              |
| C                          | -1.058636 -0.979695 -0.184515 |              |
| C                          | -2.216218 -0.013834 0.178864  |              |
| O                          | -0.539090 -0.808310 -1.326583 |              |
| O                          | -0.759192 -1.823566 0.673275  |              |
| H                          | -2.085956 0.338351 1.200321   |              |
| C                          | -3.557183 -0.730290 0.021619  |              |
| N                          | -2.154958 1.190112 -0.722371  |              |
| H                          | -1.423330 1.839482 -0.420601  |              |
| H                          | -3.555152 -1.600930 0.674558  |              |
| H                          | -3.691244 -1.072567 -1.006536 |              |
| S                          | -5.022636 0.327142 0.382202   |              |
| H                          | -1.906227 0.878228 -1.668662  |              |
| H                          | -3.051319 1.689626 -0.732484  |              |
| H                          | -4.735738 0.543399 1.682386   |              |
| 28                         |                               |              |
| Dimer 86 of the z...z type |                               |              |
| C                          | -4.040284 0.045178 -0.193865  |              |
| C                          | -2.665168 0.252080 0.539166   |              |
| O                          | -4.458508 -1.138721 -0.226202 |              |
| O                          | -4.577053 1.083355 -0.625829  |              |
| H                          | -2.890973 0.663983 1.523974   |              |
| C                          | -1.744823 1.189104 -0.228218  |              |
| N                          | -2.042663 -1.098270 0.742926  |              |
| H                          | -1.490600 -1.178222 1.597081  |              |
| H                          | -2.291769 2.105623 -0.429441  |              |
| H                          | -1.442278 0.738949 -1.173251  |              |
| S                          | -0.201578 1.625878 0.713964   |              |
| H                          | -2.820045 -1.772960 0.742872  |              |
| H                          | -1.380266 -1.338630 -0.042353 |              |
| H                          | -0.308169 2.965046 0.627565   |              |
| C                          | 0.928229 -1.389755 -0.121841  |              |
| C                          | 2.273516 -0.741694 -0.558755  |              |
| O                          | 0.007889 -1.325006 -0.991850  |              |
| O                          | 0.863491 -1.887972 1.011458   |              |
| H                          | 2.835701 -1.486426 -1.125329  |              |
| C                          | 3.102917 -0.227720 0.610519   |              |
| N                          | 1.954540 0.372761 -1.520103   |              |
| H                          | 1.387459 0.010397 -2.289829   |              |
| H                          | 3.289916 -1.057083 1.287608   |              |
| H                          | 2.555414 0.536906 1.162527    |              |
| S                          | 4.695031 0.557677 0.112336    |              |
| H                          | 1.383846 1.085337 -1.033826   |              |
| H                          | 2.804918 0.812997 -1.881983   |              |
| H                          | 5.275588 -0.560648 -0.368838  |              |
| 28                         |                               |              |
| Dimer 87 of the z...z type |                               |              |
| C                          | 2.036952 1.068770 0.614673    |              |
| C                          | 1.971671 0.384631 -0.788573   |              |
| O                          | 3.067844 1.732238 0.836325    |              |
| O                          | 1.045426 0.908616 1.370575    |              |
| H                          | 1.500041 1.103659 -1.460384   |              |
| C                          | 1.210606 -0.929402 -0.868336  |              |
| N                          | 3.394433 0.223241 -1.255513   |              |

| Nov 11, 22 15:56           | dimers_structures.xyz         | Page 282/325 |
|----------------------------|-------------------------------|--------------|
| H                          | 3.489504 0.223385 -2.271303   |              |
| H                          | 1.303310 -1.362801 -1.865730  |              |
| H                          | 0.153025 -0.745138 -0.706807  |              |
| S                          | 1.824619 -2.230700 0.282296   |              |
| H                          | 3.924859 1.004955 -0.840698   |              |
| H                          | 3.792805 -0.648068 -0.889981  |              |
| H                          | 1.654167 -1.517991 1.414339   |              |
| C                          | -2.738252 -0.942146 -0.322943 |              |
| C                          | -2.450892 -0.036616 0.919498  |              |
| O                          | -1.994553 -1.948024 -0.443969 |              |
| O                          | -3.676625 -0.562715 -1.049742 |              |
| H                          | -3.270962 -0.190956 1.623577  |              |
| C                          | -2.377874 1.449228 0.581710   |              |
| N                          | -1.196070 -0.531702 1.580674  |              |
| H                          | -1.283147 -0.579707 2.594096  |              |
| H                          | -2.000184 2.021789 1.429948   |              |
| H                          | -3.381092 1.799750 0.350780   |              |
| S                          | -1.278880 1.866384 -0.842378  |              |
| H                          | -1.045834 -1.479870 1.198077  |              |
| H                          | -0.341062 0.053051 1.366482   |              |
| H                          | -2.065801 1.298511 -1.778894  |              |
| 28                         |                               |              |
| Dimer 88 of the z...z type |                               |              |
| C                          | -0.952288 -1.099757 -0.517825 |              |
| C                          | -2.492617 -0.912663 -0.509088 |              |
| O                          | -0.473748 -1.632597 0.525303  |              |
| O                          | -0.353620 -0.643774 -1.502306 |              |
| H                          | -2.916421 -1.180519 -1.474769 |              |
| C                          | -2.803031 0.547249 -0.167986  |              |
| N                          | -3.089234 -1.829107 0.524537  |              |
| H                          | -3.164780 -2.786267 0.177496  |              |
| H                          | -2.362211 1.174848 -0.939690  |              |
| H                          | -2.357022 0.817325 0.791425   |              |
| S                          | -4.597060 0.927814 -0.004714  |              |
| H                          | -2.454754 -1.851992 1.333105  |              |
| H                          | -4.023644 -1.512030 0.807347  |              |
| H                          | -4.926590 0.662781 -1.285843  |              |
| C                          | 4.003809 -0.302001 -0.325390  |              |
| C                          | 2.508675 0.052820 -0.034473   |              |
| O                          | 4.460609 -1.290729 0.305016   |              |
| O                          | 4.570484 0.416657 -1.172694   |              |
| H                          | 1.919400 -0.245792 -0.902997  |              |
| C                          | 2.307607 1.537576 0.234376    |              |
| N                          | 2.025847 -0.796010 1.104788   |              |
| H                          | 1.068180 -1.195859 0.906430   |              |
| H                          | 2.694845 2.092275 -0.616704   |              |
| H                          | 2.860898 1.851061 1.123006    |              |
| S                          | 0.551082 2.018911 0.551596    |              |
| H                          | 2.737924 -1.536711 1.205194   |              |
| H                          | 1.984698 -0.277200 1.981508   |              |
| H                          | 0.056102 1.480511 -0.581120   |              |
| 28                         |                               |              |
| Dimer 89 of the z...z type |                               |              |
| C                          | 4.000602 -0.218283 0.411748   |              |
| C                          | 2.791912 0.398686 -0.371105   |              |
| O                          | 4.265232 -1.417189 0.148617   |              |
| O                          | 4.586947 0.564887 1.186742    |              |
| H                          | 3.210354 1.038540 -1.150460   |              |
| C                          | 1.864761 1.204667 0.530220    |              |
| N                          | 2.039718 -0.704469 -1.049127  |              |
| H                          | 1.504351 -0.394222 -1.861094  |              |
| H                          | 2.451537 1.955278 1.052717    |              |
| H                          | 1.391728 0.554474 1.267091    |              |
| S                          | 0.462711 2.013740 -0.357808   |              |
| H                          | 2.710647 -1.434947 -1.304459  |              |
| H                          | 1.317651 -1.116030 -0.401273  |              |
| H                          | 1.198022 2.939858 -1.006035   |              |
| C                          | -1.002965 -1.233937 -0.503153 |              |
| C                          | -2.466304 -1.023889 -0.035186 |              |

| Nov 11, 22 15:56           |           | dimers_structures.xyz |           | Page 283/325 |  |
|----------------------------|-----------|-----------------------|-----------|--------------|--|
| O                          | -0.142745 | -1.333040             | 0.421838  |              |  |
| O                          | -0.815094 | -1.233099             | -1.728527 |              |  |
| H                          | -3.128371 | -1.688110             | -0.587956 |              |  |
| C                          | -2.869504 | 0.435425              | -0.245497 |              |  |
| N                          | -2.572573 | -1.388328             | 1.422006  |              |  |
| H                          | -2.592297 | -2.400612             | 1.553056  |              |  |
| H                          | -2.728874 | 0.677605              | -1.296822 |              |  |
| H                          | -2.232828 | 1.098141              | 0.342121  |              |  |
| S                          | -4.592326 | 0.824171              | 0.276289  |              |  |
| H                          | -1.736187 | -1.042661             | 1.907086  |              |  |
| H                          | -3.420336 | -0.992032             | 1.842797  |              |  |
| H                          | -5.207318 | 0.019224              | -0.614138 |              |  |
| 28                         |           |                       |           |              |  |
| Dimer 90 of the z...z type |           |                       |           |              |  |
| C                          | 4.021599  | -0.186744             | 0.342523  |              |  |
| C                          | 2.784457  | 0.394805              | -0.423429 |              |  |
| O                          | 4.296657  | -1.387780             | 0.100951  |              |  |
| O                          | 4.615780  | 0.622510              | 1.083999  |              |  |
| H                          | 3.172978  | 1.020635              | -1.229203 |              |  |
| C                          | 1.872206  | 1.210898              | 0.484524  |              |  |
| N                          | 2.030288  | -0.735097             | -1.053671 |              |  |
| H                          | 1.468960  | -0.450498             | -1.857145 |              |  |
| H                          | 2.461466  | 1.987844              | 0.963899  |              |  |
| H                          | 1.436272  | 0.575001              | 1.255733  |              |  |
| S                          | 0.424004  | 1.965956              | -0.376378 |              |  |
| H                          | 2.704672  | -1.461010             | -1.312443 |              |  |
| H                          | 1.334182  | -1.142256             | -0.372801 |              |  |
| H                          | 1.115048  | 2.880111              | -1.087324 |              |  |
| C                          | -0.977114 | -1.268206             | -0.358356 |              |  |
| C                          | -2.407303 | -0.985241             | 0.170422  |              |  |
| O                          | -0.071842 | -1.330668             | 0.524981  |              |  |
| O                          | -0.858166 | -1.385398             | -1.586902 |              |  |
| H                          | -3.041815 | -1.841716             | -0.058806 |              |  |
| C                          | -2.986923 | 0.286635              | -0.444322 |              |  |
| N                          | -2.362954 | -0.870365             | 1.672268  |              |  |
| H                          | -2.074692 | -1.753721             | 2.095917  |              |  |
| H                          | -2.957594 | 0.179353              | -1.526108 |              |  |
| H                          | -2.383425 | 1.154514              | -0.174673 |              |  |
| S                          | -4.697221 | 0.683538              | 0.114151  |              |  |
| H                          | -1.663804 | -0.177416             | 1.953045  |              |  |
| H                          | -3.277901 | -0.597832             | 2.047057  |              |  |
| H                          | -5.295185 | -0.388873             | -0.444101 |              |  |
| 28                         |           |                       |           |              |  |
| Dimer 91 of the z...z type |           |                       |           |              |  |
| C                          | 2.459066  | -0.595852             | -0.866579 |              |  |
| C                          | 2.555789  | 0.886146              | -0.376673 |              |  |
| O                          | 1.745412  | -0.782097             | -1.882947 |              |  |
| O                          | 3.121414  | -1.420019             | -0.205836 |              |  |
| H                          | 3.510446  | 1.270200              | -0.745731 |              |  |
| C                          | 2.529704  | 1.053531              | 1.136237  |              |  |
| N                          | 1.483574  | 1.685034              | -1.055592 |              |  |
| H                          | 1.747103  | 2.661479              | -1.181844 |              |  |
| H                          | 2.444251  | 2.105904              | 1.411494  |              |  |
| H                          | 3.463321  | 0.669833              | 1.540888  |              |  |
| S                          | 1.139604  | 0.188457              | 1.986515  |              |  |
| H                          | 1.334444  | 1.245989              | -1.972984 |              |  |
| H                          | 0.540456  | 1.677755              | -0.581498 |              |  |
| H                          | 1.610115  | -1.052003             | 1.743732  |              |  |
| C                          | -2.166148 | 1.504072              | -0.253522 |              |  |
| C                          | -2.060615 | 0.054530              | 0.293067  |              |  |
| O                          | -3.309092 | 1.929095              | -0.503180 |              |  |
| O                          | -1.064113 | 2.095194              | -0.392395 |              |  |
| H                          | -1.494566 | 0.067266              | 1.221435  |              |  |
| C                          | -1.390492 | -0.873546             | -0.715069 |              |  |
| N                          | -3.444094 | -0.442014             | 0.622639  |              |  |
| H                          | -3.828183 | 0.052118              | 1.429219  |              |  |
| H                          | -0.408507 | -0.486521             | -0.971727 |              |  |
| H                          | -1.979034 | -0.938800             | -1.632750 |              |  |
| S                          | -1.197349 | -2.607223             | -0.121833 |              |  |

Nov 11, 22 15:56

dimers\_structures.xyz

Page 284/325

|                            |           |           |           |
|----------------------------|-----------|-----------|-----------|
| H                          | -4.075148 | -0.251302 | -0.161514 |
| H                          | -3.432841 | -1.447218 | 0.826347  |
| H                          | -0.297099 | -2.326258 | 0.840789  |
| 28                         |           |           |           |
| Dimer 92 of the z...z type |           |           |           |
| C                          | 1.325156  | -0.351695 | 0.031191  |
| C                          | 2.424060  | 0.742008  | 0.082539  |
| O                          | 0.733126  | -0.577803 | 1.127797  |
| O                          | 1.098440  | -0.856848 | -1.078727 |
| H                          | 1.954849  | 1.658389  | -0.280779 |
| C                          | 3.652393  | 0.430113  | -0.761235 |
| N                          | 2.781914  | 0.977194  | 1.525122  |
| H                          | 3.123986  | 1.921119  | 1.707157  |
| H                          | 4.373144  | 1.247801  | -0.722674 |
| H                          | 3.328028  | 0.296603  | -1.790547 |
| S                          | 4.562060  | -1.074645 | -0.204792 |
| H                          | 1.935356  | 0.783728  | 2.078750  |
| H                          | 3.498392  | 0.303860  | 1.820652  |
| H                          | 3.571181  | -1.944260 | -0.491349 |
| C                          | -4.128645 | -0.781728 | 0.165787  |
| C                          | -2.727900 | -0.082571 | 0.279761  |
| O                          | -4.099512 | -2.025976 | -0.009729 |
| O                          | -5.112929 | -0.027514 | 0.292188  |
| H                          | -2.596297 | 0.190248  | 1.328437  |
| C                          | -2.634390 | 1.161348  | -0.593584 |
| N                          | -1.663917 | -1.085781 | -0.043772 |
| H                          | -2.123295 | -2.006332 | 0.024825  |
| H                          | -3.471564 | 1.810513  | -0.349695 |
| H                          | -2.711280 | 0.895799  | -1.650739 |
| S                          | -1.052987 | 2.101793  | -0.443816 |
| H                          | -1.295563 | -0.988480 | -0.992345 |
| H                          | -0.818520 | -1.014243 | 0.574304  |
| H                          | -1.156613 | 2.371274  | 0.873287  |
| 28                         |           |           |           |
| Dimer 93 of the z...z type |           |           |           |
| C                          | 1.169202  | -0.244595 | -0.769128 |
| C                          | 2.251393  | 0.764785  | -0.303130 |
| O                          | 0.660052  | -0.948849 | 0.152170  |
| O                          | 0.935875  | -0.269958 | -1.983542 |
| H                          | 2.094837  | 1.714523  | -0.814141 |
| C                          | 3.661241  | 0.257341  | -0.606789 |
| N                          | 2.066786  | 1.022271  | 1.167947  |
| H                          | 2.760248  | 1.671717  | 1.543511  |
| H                          | 4.408911  | 1.005164  | -0.336712 |
| H                          | 3.726318  | 0.081454  | -1.679710 |
| S                          | 4.146907  | -1.267012 | 0.311307  |
| H                          | 1.125037  | 1.410591  | 1.321159  |
| H                          | 2.123832  | 0.134886  | 1.677564  |
| H                          | 3.171053  | -2.062248 | -0.173133 |
| C                          | -3.690962 | -0.947514 | -0.124804 |
| C                          | -2.709605 | 0.097610  | 0.518166  |
| O                          | -3.600746 | -2.115982 | 0.329005  |
| O                          | -4.466188 | -0.493055 | -0.986706 |
| H                          | -3.306720 | 0.720078  | 1.186229  |
| C                          | -2.031677 | 0.961195  | -0.534943 |
| N                          | -1.724350 | -0.655395 | 1.362772  |
| H                          | -2.170974 | -1.570688 | 1.535889  |
| H                          | -2.806426 | 1.433602  | -1.133116 |
| H                          | -1.404397 | 0.359875  | -1.195374 |
| S                          | -0.906688 | 2.269081  | 0.130294  |
| H                          | -0.818154 | -0.824051 | 0.855627  |
| H                          | -1.511869 | -0.187266 | 2.241017  |
| H                          | -1.761725 | 2.800951  | 1.026881  |
| 28                         |           |           |           |
| Dimer 94 of the z...z type |           |           |           |
| C                          | -2.576560 | -0.670209 | 0.990276  |
| C                          | -2.782722 | -0.577526 | -0.555313 |
| O                          | -3.592256 | -0.477629 | 1.683673  |
| O                          | -1.414544 | -0.961711 | 1.367915  |

| Nov 11, 22 15:56           | dimers_structures.xyz |           | Page 285/325 |
|----------------------------|-----------------------|-----------|--------------|
| H                          | -2.969194             | -1.593161 | -0.910832    |
| C                          | -1.605339             | 0.005147  | -1.321733    |
| N                          | -4.045562             | 0.205123  | -0.793895    |
| H                          | -4.524980             | -0.051907 | -1.657128    |
| H                          | -1.817978             | 0.053775  | -2.390261    |
| H                          | -0.755410             | -0.657854 | -1.178004    |
| S                          | -1.171448             | 1.728849  | -0.827510    |
| H                          | -4.651234             | 0.035931  | 0.023744     |
| H                          | -3.839652             | 1.209896  | -0.819273    |
| H                          | -0.967691             | 1.459426  | 0.478172     |
| C                          | 2.294603              | -1.754833 | -0.599375    |
| C                          | 1.873005              | -0.349851 | -0.061669    |
| O                          | 2.370005              | -2.665459 | 0.261635     |
| O                          | 2.538868              | -1.794113 | -1.821358    |
| H                          | 1.133424              | 0.088168  | -0.725417    |
| C                          | 3.090041              | 0.569663  | 0.003777     |
| N                          | 1.249443              | -0.518767 | 1.288830     |
| H                          | 1.696737              | -1.341464 | 1.715702     |
| H                          | 3.525499              | 0.631607  | -0.991372    |
| H                          | 3.842134              | 0.170709  | 0.687601     |
| S                          | 2.706370              | 2.264855  | 0.628788     |
| H                          | 1.381634              | 0.310127  | 1.874382     |
| H                          | 0.220777              | -0.713948 | 1.232173     |
| H                          | 1.765265              | 2.551893  | -0.295186    |
| 28                         |                       |           |              |
| Dimer 95 of the z...z type |                       |           |              |
| C                          | 3.961758              | 0.498854  | -0.556831    |
| C                          | 2.845650              | -0.264734 | 0.239878     |
| O                          | 4.169789              | 1.682636  | -0.195215    |
| O                          | 4.540802              | -0.170848 | -1.435381    |
| H                          | 3.357412              | -0.932379 | 0.935597     |
| C                          | 1.924964              | -1.061850 | -0.674805    |
| N                          | 2.078148              | 0.728232  | 1.059030     |
| H                          | 2.732084              | 1.456501  | 1.361083     |
| H                          | 2.539117              | -1.697928 | -1.306252    |
| H                          | 1.340363              | -0.393268 | -1.308065    |
| S                          | 0.666249              | -2.096571 | 0.194681     |
| H                          | 1.321053              | 1.180391  | 0.486703     |
| H                          | 1.599830              | 0.311460  | 1.858906     |
| H                          | 1.521326              | -2.865004 | 0.898326     |
| C                          | -0.939133             | 0.832806  | 0.583044     |
| C                          | -2.152072             | 0.037416  | 0.039032     |
| O                          | -0.811539             | 0.894667  | 1.822514     |
| O                          | -0.194834             | 1.330555  | -0.300767    |
| H                          | -1.834628             | -0.586928 | -0.794075    |
| C                          | -3.262035             | 0.991849  | -0.394515    |
| N                          | -2.633700             | -0.879244 | 1.127899     |
| H                          | -1.977658             | -1.652425 | 1.260336     |
| H                          | -2.858854             | 1.657971  | -1.155109    |
| H                          | -3.596997             | 1.597316  | 0.449996     |
| S                          | -4.775416             | 0.152943  | -1.029180    |
| H                          | -2.656667             | -0.357612 | 2.011790     |
| H                          | -3.560932             | -1.261552 | 0.914182     |
| H                          | -4.198447             | -0.403534 | -2.113947    |
| 28                         |                       |           |              |
| Dimer 96 of the z...z type |                       |           |              |
| C                          | -1.160961             | 0.021164  | 0.065067     |
| C                          | -2.624205             | -0.243035 | -0.375223    |
| O                          | -0.711299             | -0.764394 | 0.952528     |
| O                          | -0.594843             | 0.987239  | -0.463428    |
| H                          | -2.686755             | -0.241968 | -1.462177    |
| C                          | -3.540437             | 0.828497  | 0.217950     |
| N                          | -3.043679             | -1.609164 | 0.098982     |
| H                          | -2.623292             | -2.345755 | -0.469155    |
| H                          | -3.199313             | 1.798802  | -0.137290    |
| H                          | -3.479212             | 0.821849  | 1.308305     |
| S                          | -5.326805             | 0.601410  | -0.171587    |
| H                          | -2.703121             | -1.745364 | 1.057379     |
| H                          | -4.064099             | -1.713858 | 0.066813     |

| Nov 11, 22 15:56           | dimers_structures.xyz |           | Page 286/325 |
|----------------------------|-----------------------|-----------|--------------|
| H                          | -5.220265             | 0.783763  | -1.503792    |
| C                          | 2.736992              | -1.705304 | -0.360283    |
| C                          | 2.417413              | -0.202073 | -0.091912    |
| O                          | 2.805787              | -2.445469 | 0.651509     |
| O                          | 2.923108              | -1.992692 | -1.561790    |
| H                          | 1.646114              | 0.138481  | -0.780404    |
| C                          | 3.687475              | 0.627511  | -0.262117    |
| N                          | 1.854499              | -0.057133 | 1.284875     |
| H                          | 0.831186              | -0.343312 | 1.267370     |
| H                          | 4.080978              | 0.457365  | -1.262246    |
| H                          | 4.446497              | 0.325905  | 0.463159     |
| S                          | 3.450275              | 2.439080  | 0.011043     |
| H                          | 2.358422              | -0.690859 | 1.911443     |
| H                          | 1.920856              | 0.907542  | 1.616624     |
| H                          | 2.561063              | 2.625605  | -0.985765    |
| 28                         |                       |           |              |
| Dimer 97 of the z...z type |                       |           |              |
| C                          | -3.960701             | -0.500594 | -0.557090    |
| C                          | -2.845758             | 0.265126  | 0.239170     |
| O                          | -4.168364             | -1.683840 | -0.193553    |
| O                          | -4.539369             | 0.167210  | -1.437348    |
| H                          | -3.358491             | 0.933840  | 0.933145     |
| C                          | -1.924647             | 1.060980  | -0.676246    |
| N                          | -2.078378             | -0.725778 | 1.060950     |
| H                          | -2.732158             | -1.453434 | 1.364738     |
| H                          | -2.538571             | 1.695807  | -1.309174    |
| H                          | -1.339424             | 0.391517  | -1.307999    |
| S                          | -0.666843             | 2.097433  | 0.192446     |
| H                          | -1.321153             | -1.179258 | 0.489847     |
| H                          | -1.600306             | -0.307002 | 1.859948     |
| H                          | -1.522609             | 2.866651  | 0.894410     |
| C                          | 0.939031              | -0.831284 | 0.585317     |
| C                          | 2.151886              | -0.037143 | 0.039236     |
| O                          | 0.811605              | -0.890311 | 1.824937     |
| O                          | 0.194635              | -1.331092 | -0.297255    |
| H                          | 1.834285              | 0.585446  | -0.795128    |
| C                          | 3.261531              | -0.992750 | -0.392636    |
| N                          | 2.634198              | 0.881581  | 1.126031     |
| H                          | 1.978626              | 1.655402  | 1.257033     |
| H                          | 2.857863              | -1.660723 | -1.151348    |
| S                          | 3.596909              | -1.596116 | 0.453225     |
| S                          | 4.774514              | -0.155403 | -1.030233    |
| H                          | 2.657012              | 0.361651  | 2.010934     |
| H                          | 3.561600              | 1.262918  | 0.911329     |
| H                          | 4.196843              | 0.398441  | -2.115984    |
| 28                         |                       |           |              |
| Dimer 98 of the z...z type |                       |           |              |
| C                          | -0.917107             | -0.854015 | 0.635660     |
| C                          | -2.163218             | -0.033650 | 0.197020     |
| O                          | -0.264463             | -1.387111 | -0.311057    |
| O                          | -0.702473             | -0.910457 | 1.851938     |
| H                          | -2.225068             | 0.875921  | 0.791519     |
| C                          | -3.428261             | -0.872929 | 0.361376     |
| N                          | -1.982056             | 0.384614  | -1.235509    |
| H                          | -1.262081             | 1.115416  | -1.290414    |
| H                          | -3.504893             | -1.172179 | 1.405187     |
| H                          | -3.373697             | -1.775874 | -0.250292    |
| S                          | -4.974725             | -0.015566 | -0.160340    |
| H                          | -1.634298             | -0.418012 | -1.771782    |
| H                          | -2.856435             | 0.732969  | -1.641436    |
| H                          | -4.936184             | 0.952177  | 0.778251     |
| C                          | 3.952817              | -0.547568 | 0.058252     |
| C                          | 2.807012              | 0.395856  | -0.456111    |
| O                          | 4.095600              | -1.615536 | -0.588466    |
| O                          | 4.608932              | -0.115115 | 1.024185     |
| H                          | 3.290343              | 1.206020  | -1.005202    |
| C                          | 1.972753              | 0.960892  | 0.683271     |
| N                          | 1.979122              | -0.378904 | -1.438866    |
| H                          | 2.595210              | -1.138025 | -1.769541    |



| Nov 11, 22 15:56 dimers_structures.xyz Page 287/325 |           |           |           |
|-----------------------------------------------------|-----------|-----------|-----------|
| H                                                   | 2.640430  | 1.480596  | 1.365342  |
| H                                                   | 1.464982  | 0.167524  | 1.234304  |
| S                                                   | 0.625477  | 2.115260  | 0.161900  |
| H                                                   | 1.141401  | -0.818743 | -0.981696 |
| H                                                   | 1.653354  | 0.188069  | -2.219123 |
| H                                                   | 1.370695  | 2.903308  | -0.639073 |
| 28                                                  |           |           |           |
| Dimer 99 of the z...z type                          |           |           |           |
| C                                                   | -0.917256 | 0.850804  | -0.639009 |
| C                                                   | -2.163721 | 0.032030  | -0.198470 |
| O                                                   | -0.265598 | 1.387241  | 0.306540  |
| O                                                   | -0.701500 | 0.903274  | -1.855247 |
| H                                                   | -2.227198 | -0.877963 | -0.792132 |
| C                                                   | -3.427906 | 0.872743  | -0.362259 |
| N                                                   | -1.981397 | -0.385047 | 1.234262  |
| H                                                   | -1.263666 | -1.118158 | 1.288787  |
| H                                                   | -3.505601 | 1.170628  | -1.406387 |
| H                                                   | -3.371328 | 1.776454  | 0.248088  |
| S                                                   | -4.974768 | 0.018098  | 0.162747  |
| H                                                   | -1.630077 | 0.417378  | 1.768624  |
| H                                                   | -2.856146 | -0.730005 | 1.642282  |
| H                                                   | -4.938325 | -0.951412 | -0.774100 |
| C                                                   | 3.952134  | 0.549269  | -0.057214 |
| C                                                   | 2.806476  | -0.394016 | 0.457794  |
| O                                                   | 4.093174  | 1.618806  | 0.587333  |
| O                                                   | 4.609847  | 0.115318  | -1.021379 |
| H                                                   | 3.289791  | -1.202611 | 1.009181  |
| C                                                   | 1.974184  | -0.961963 | -0.681560 |
| N                                                   | 1.976803  | 0.382142  | 1.437996  |
| H                                                   | 1.650566  | -0.183468 | 2.219037  |
| H                                                   | 2.643249  | -1.482307 | -1.361782 |
| H                                                   | 1.466378  | -0.170139 | -1.234766 |
| S                                                   | 0.627296  | -2.116802 | -0.160085 |
| H                                                   | 2.592009  | 1.142343  | 1.767867  |
| H                                                   | 1.139279  | 0.820546  | 0.979001  |
| H                                                   | 1.371924  | -2.901988 | 0.644239  |
| 28                                                  |           |           |           |
| Dimer 100 of the z...z type                         |           |           |           |
| C                                                   | 1.664923  | -0.454802 | -0.221998 |
| C                                                   | 3.109413  | -0.910451 | 0.127429  |
| O                                                   | 1.289963  | -0.628766 | -1.399358 |
| O                                                   | 1.010274  | 0.030213  | 0.737320  |
| H                                                   | 3.035246  | -1.900437 | 0.581955  |
| C                                                   | 3.845249  | 0.027244  | 1.077059  |
| N                                                   | 3.850435  | -1.078956 | -1.170912 |
| H                                                   | 4.587583  | -1.782957 | -1.127906 |
| H                                                   | 4.849919  | -0.341453 | 1.287847  |
| H                                                   | 3.286089  | 0.074219  | 2.008358  |
| S                                                   | 4.060123  | 1.730286  | 0.403607  |
| H                                                   | 3.148133  | -1.330491 | -1.882631 |
| H                                                   | 4.263679  | -0.183813 | -1.457512 |
| H                                                   | 2.744541  | 2.029070  | 0.380470  |
| C                                                   | -2.580291 | -1.705614 | 0.431346  |
| C                                                   | -2.555870 | -0.143686 | 0.378282  |
| O                                                   | -1.940039 | -2.294557 | -0.472221 |
| O                                                   | -3.277103 | -2.186040 | 1.349746  |
| H                                                   | -2.427355 | 0.250515  | 1.385569  |
| C                                                   | -3.874005 | 0.351082  | -0.216738 |
| N                                                   | -1.391920 | 0.305949  | -0.438901 |
| H                                                   | -0.482182 | 0.267130  | 0.107156  |
| H                                                   | -4.693817 | -0.028679 | 0.389848  |
| H                                                   | -3.995592 | -0.023931 | -1.235421 |
| S                                                   | -4.006439 | 2.187139  | -0.359493 |
| H                                                   | -1.253547 | -0.349967 | -1.215753 |
| H                                                   | -1.522526 | 1.254821  | -0.796820 |
| H                                                   | -3.930002 | 2.448785  | 0.961535  |
| 28                                                  |           |           |           |
| Dimer 101 of the z...z type                         |           |           |           |
| C                                                   | -1.644954 | 1.257107  | -0.992055 |

| Nov 11, 22 15:56 dimers_structures.xyz Page 288/325 |           |           |           |
|-----------------------------------------------------|-----------|-----------|-----------|
| C                                                   | -2.718737 | 0.134170  | -1.006052 |
| O                                                   | -0.464037 | 0.881929  | -1.262487 |
| O                                                   | -2.049470 | 2.382583  | -0.677918 |
| H                                                   | -3.428340 | 0.326446  | -1.812610 |
| C                                                   | -3.473614 | 0.051560  | 0.317160  |
| N                                                   | -2.047458 | -1.176863 | -1.319323 |
| H                                                   | -2.714345 | -1.943514 | -1.426228 |
| H                                                   | -4.140313 | -0.811507 | 0.336971  |
| H                                                   | -4.074241 | 0.951870  | 0.422089  |
| S                                                   | -2.384006 | -0.101692 | 1.803023  |
| H                                                   | -1.502399 | -1.089471 | -2.179525 |
| H                                                   | -1.366686 | -1.430142 | -0.583820 |
| H                                                   | -2.007928 | 1.193592  | 1.818554  |
| C                                                   | 3.446958  | 0.849363  | 0.097357  |
| C                                                   | 2.327653  | -0.157205 | 0.543706  |
| O                                                   | 3.231768  | 2.052032  | 0.383543  |
| O                                                   | 4.437102  | 0.333397  | -0.456881 |
| H                                                   | 2.687798  | -0.643837 | 1.452513  |
| C                                                   | 2.020019  | -1.196951 | -0.522862 |
| N                                                   | 1.104540  | 0.625167  | 0.912055  |
| H                                                   | 1.417546  | 1.509632  | 1.326024  |
| H                                                   | 2.947851  | -1.696964 | -0.786721 |
| H                                                   | 1.606161  | -0.722192 | -1.414327 |
| S                                                   | 0.757366  | -2.455343 | -0.031010 |
| H                                                   | 0.540283  | 0.851646  | 0.052621  |
| H                                                   | 0.487990  | 0.121483  | 1.550504  |
| H                                                   | 1.186432  | -2.670393 | 1.229044  |
| 28                                                  |           |           |           |
| Dimer 102 of the z...z type                         |           |           |           |
| C                                                   | 3.585586  | -0.407529 | 0.724469  |
| C                                                   | 2.691737  | 0.410244  | -0.269492 |
| O                                                   | 3.520358  | -1.657521 | 0.623934  |
| O                                                   | 4.244016  | 0.286561  | 1.525541  |
| H                                                   | 3.303934  | 1.174461  | -0.744572 |
| C                                                   | 1.539150  | 1.054981  | 0.497301  |
| N                                                   | 2.183146  | -0.521946 | -1.331311 |
| H                                                   | 2.795052  | -0.531865 | -2.144948 |
| H                                                   | 1.944918  | 1.533600  | 1.385835  |
| H                                                   | 0.829169  | 0.290975  | 0.814696  |
| S                                                   | 0.576045  | 2.310203  | -0.457225 |
| H                                                   | 2.210708  | -1.459835 | -0.902669 |
| H                                                   | 1.189609  | -0.356222 | -1.639498 |
| H                                                   | 1.461227  | 3.317039  | -0.309461 |
| C                                                   | -0.866806 | -1.109789 | -0.786114 |
| C                                                   | -2.358100 | -0.924450 | -0.405383 |
| O                                                   | -0.163619 | -1.788664 | -0.007888 |
| O                                                   | -0.503784 | -0.477183 | -1.808619 |
| H                                                   | -2.998004 | -1.084550 | -1.271080 |
| C                                                   | -2.546901 | 0.488315  | 0.151938  |
| N                                                   | -2.713951 | -1.955101 | 0.630852  |
| H                                                   | -2.917509 | -2.859737 | 0.203982  |
| H                                                   | -2.272517 | 1.196250  | -0.626553 |
| H                                                   | -1.887393 | 0.655196  | 1.006152  |
| S                                                   | -4.244268 | 0.847531  | 0.769183  |
| H                                                   | -1.894249 | -2.088134 | 1.237691  |
| H                                                   | -3.530583 | -1.665854 | 1.180639  |
| H                                                   | -4.870930 | 0.718101  | -0.418374 |
| 28                                                  |           |           |           |
| Dimer 103 of the z...z type                         |           |           |           |
| C                                                   | 3.587470  | 0.547315  | 0.402175  |
| C                                                   | 2.412040  | -0.441094 | 0.679065  |
| O                                                   | 3.418383  | 1.725413  | 0.795363  |
| O                                                   | 4.562821  | 0.042532  | -0.193143 |
| H                                                   | 2.746249  | -1.180804 | 1.409684  |
| C                                                   | 1.954478  | -1.181038 | -0.575139 |
| N                                                   | 1.263044  | 0.294796  | 1.302840  |
| H                                                   | 1.011856  | 1.084677  | 0.704474  |
| H                                                   | 1.152512  | -1.881599 | -0.339744 |
| H                                                   | 2.805089  | -1.728175 | -0.974408 |

| Nov 11, 22 15:56 dimers_structures.xyz Page 289/325 |           |           |           |
|-----------------------------------------------------|-----------|-----------|-----------|
| S                                                   | 1.270872  | -0.078748 | -1.890103 |
| H                                                   | 0.426175  | -0.345758 | 1.420692  |
| H                                                   | 1.544144  | 0.696456  | 2.196318  |
| H                                                   | 2.389397  | 0.651631  | -2.078632 |
| C                                                   | -1.709509 | -1.608867 | 0.646051  |
| C                                                   | -2.035339 | -0.305550 | -0.136914 |
| O                                                   | -2.480295 | -2.568507 | 0.481693  |
| O                                                   | -0.702598 | -1.526930 | 1.400128  |
| H                                                   | -1.129626 | 0.107932  | -0.576774 |
| C                                                   | -2.685112 | 0.714783  | 0.797450  |
| N                                                   | -2.962720 | -0.644141 | -1.270613 |
| H                                                   | -2.456382 | -1.055857 | -2.056134 |
| H                                                   | -2.010839 | 0.897318  | 1.632040  |
| H                                                   | -3.622779 | 0.325563  | 1.198868  |
| S                                                   | -3.117442 | 2.306578  | -0.023504 |
| H                                                   | -3.631981 | -1.350989 | -0.940595 |
| H                                                   | -3.456809 | 0.189357  | -1.608260 |
| H                                                   | -1.854831 | 2.657013  | -0.343861 |
| 28                                                  |           |           |           |
| Dimer 104 of the z...z type                         |           |           |           |
| C                                                   | -1.161800 | 1.358526  | 0.133741  |
| C                                                   | -2.648776 | 0.938704  | 0.266229  |
| O                                                   | -0.769712 | 1.698338  | -1.001579 |
| O                                                   | -0.493515 | 1.255135  | 1.193727  |
| H                                                   | -3.092397 | 1.393529  | 1.149936  |
| C                                                   | -2.740130 | -0.585737 | 0.339177  |
| N                                                   | -3.396124 | 1.447574  | -0.936539 |
| H                                                   | -3.625127 | 2.438312  | -0.845812 |
| H                                                   | -2.160186 | -0.919589 | 1.197011  |
| H                                                   | -2.310638 | -1.035309 | -0.557382 |
| S                                                   | -4.460189 | -1.236037 | 0.437588  |
| H                                                   | -2.780762 | 1.356097  | -1.755153 |
| H                                                   | -4.268416 | 0.926192  | -1.078758 |
| H                                                   | -4.774588 | -0.662698 | 1.617476  |
| C                                                   | 4.230789  | 0.114679  | 0.288224  |
| C                                                   | 2.695447  | -0.205915 | 0.310781  |
| O                                                   | 4.529459  | 1.332162  | 0.194417  |
| O                                                   | 4.984132  | -0.873336 | 0.393156  |
| H                                                   | 2.448236  | -0.504964 | 1.331220  |
| C                                                   | 2.330650  | -1.324995 | -0.655253 |
| N                                                   | 1.935109  | 1.052254  | 0.028619  |
| H                                                   | 1.080096  | 1.179529  | 0.634221  |
| H                                                   | 2.938513  | -2.194621 | -0.418309 |
| H                                                   | 2.549064  | -1.030324 | -1.684799 |
| S                                                   | 0.543183  | -1.783693 | -0.652951 |
| H                                                   | 2.614557  | 1.817952  | 0.150374  |
| H                                                   | 1.573919  | 1.096452  | -0.926233 |
| H                                                   | 0.466925  | -2.113637 | 0.652286  |
| 28                                                  |           |           |           |
| Dimer 105 of the z...z type                         |           |           |           |
| C                                                   | 2.321528  | -1.333753 | -0.765052 |
| C                                                   | 2.061994  | -0.280268 | 0.354447  |
| O                                                   | 3.509576  | -1.610964 | -1.000561 |
| O                                                   | 1.284346  | -1.761806 | -1.333821 |
| H                                                   | 1.293459  | -0.647470 | 1.032080  |
| C                                                   | 1.650083  | 1.049456  | -0.275240 |
| N                                                   | 3.324660  | -0.119709 | 1.156003  |
| H                                                   | 3.408425  | -0.848142 | 1.866759  |
| O                                                   | 0.790591  | 0.881748  | -0.922224 |
| H                                                   | 2.454149  | 1.443041  | -0.900498 |
| S                                                   | 1.279344  | 2.387563  | 0.936636  |
| H                                                   | 4.118778  | -0.239350 | 0.511693  |
| H                                                   | 3.369263  | 0.789853  | 1.626602  |
| H                                                   | 0.362967  | 1.709006  | 1.657662  |
| C                                                   | -2.294343 | -1.439133 | 1.075055  |
| C                                                   | -1.672278 | -0.398461 | 0.084522  |
| O                                                   | -2.638322 | -2.533354 | 0.564363  |
| O                                                   | -2.399271 | -1.041165 | 2.250841  |
| H                                                   | -0.760375 | -0.009447 | 0.527655  |

| Nov 11, 22 15:56 dimers_structures.xyz Page 290/325 |           |           |           |
|-----------------------------------------------------|-----------|-----------|-----------|
| C                                                   | -2.656233 | 0.744013  | -0.153864 |
| N                                                   | -1.316438 | -1.104283 | -1.185680 |
| H                                                   | -0.296496 | -1.388144 | -1.201185 |
| H                                                   | -2.896356 | 1.197320  | 0.805565  |
| H                                                   | -3.579565 | 0.364508  | -0.596248 |
| S                                                   | -2.053301 | 2.038173  | -1.324827 |
| H                                                   | -1.897662 | -1.956745 | -1.199313 |
| H                                                   | -1.492467 | -0.532903 | -2.014261 |
| H                                                   | -1.064100 | 2.520080  | -0.541274 |
| 28                                                  |           |           |           |
| Dimer 106 of the z...z type                         |           |           |           |
| C                                                   | -1.027894 | 1.185569  | 1.115653  |
| C                                                   | -2.373978 | 0.650102  | 0.568222  |
| O                                                   | -0.525453 | 2.152656  | 0.508343  |
| O                                                   | -0.531826 | 0.517341  | 2.057983  |
| H                                                   | -2.993110 | 0.253086  | 1.369385  |
| C                                                   | -2.068246 | -0.421661 | -0.479982 |
| N                                                   | -3.114150 | 1.794648  | -0.070275 |
| H                                                   | -3.562034 | 2.390758  | 0.627613  |
| H                                                   | -1.458243 | -1.204806 | -0.032118 |
| H                                                   | -1.493361 | 0.012801  | -1.301307 |
| S                                                   | -3.564456 | -1.151834 | -1.267379 |
| H                                                   | -2.427668 | 2.371886  | -0.573793 |
| H                                                   | -3.835434 | 1.456855  | -0.717049 |
| H                                                   | -4.062161 | -1.721440 | -0.149954 |
| C                                                   | 1.328456  | -1.804468 | 0.512873  |
| C                                                   | 1.712124  | -0.356654 | 0.074906  |
| O                                                   | 1.817844  | -2.189442 | 1.601628  |
| O                                                   | 0.604629  | -2.424349 | -0.294834 |
| H                                                   | 0.860801  | 0.124171  | -0.401529 |
| C                                                   | 2.891632  | -0.405394 | -0.890878 |
| N                                                   | 2.035520  | 0.443408  | 1.296893  |
| H                                                   | 1.126126  | 0.616120  | 1.804878  |
| H                                                   | 2.622132  | -1.035061 | -1.737254 |
| H                                                   | 3.769364  | -0.837576 | -0.405846 |
| S                                                   | 3.433499  | 1.251234  | -1.500970 |
| H                                                   | 2.643115  | -0.114131 | 1.903334  |
| H                                                   | 2.479437  | 1.333759  | 1.062620  |
| H                                                   | 2.282634  | 1.562178  | -2.131460 |
| 28                                                  |           |           |           |
| Dimer 107 of the z...z type                         |           |           |           |
| C                                                   | 2.215608  | -1.357918 | -0.355337 |
| C                                                   | 2.713096  | -0.526580 | 0.863489  |
| O                                                   | 3.094768  | -1.824207 | -1.105218 |
| O                                                   | 0.970298  | -1.491953 | -0.443009 |
| H                                                   | 2.616121  | -1.156906 | 1.750081  |
| C                                                   | 1.965253  | 0.782913  | 1.092194  |
| N                                                   | 4.185350  | -0.276117 | 0.664676  |
| H                                                   | 4.697183  | -0.147652 | 1.537835  |
| H                                                   | 2.362468  | 1.298406  | 1.967907  |
| H                                                   | 0.910499  | 0.580598  | 1.259905  |
| S                                                   | 2.108037  | 1.971489  | -0.310391 |
| H                                                   | 4.559660  | -1.072953 | 0.131039  |
| H                                                   | 4.316419  | 0.555943  | 0.077704  |
| H                                                   | 1.165849  | 1.401726  | -1.090355 |
| C                                                   | -1.410979 | 0.856805  | -0.489754 |
| C                                                   | -1.914703 | -0.612291 | -0.590935 |
| O                                                   | -1.238431 | 1.288763  | 0.677375  |
| O                                                   | -1.271724 | 1.451870  | -1.577728 |
| H                                                   | -1.448768 | -1.088400 | -1.452059 |
| C                                                   | -3.434086 | -0.672993 | -0.741604 |
| N                                                   | -1.438583 | -1.350002 | 0.623109  |
| H                                                   | -0.407302 | -1.493718 | 0.486979  |
| H                                                   | -3.763468 | -1.701126 | -0.904585 |
| H                                                   | -3.709841 | -0.084565 | -1.616303 |
| S                                                   | -4.389510 | -0.097448 | 0.729651  |
| H                                                   | -1.588579 | -0.752317 | 1.441680  |
| H                                                   | -1.906353 | -2.245695 | 0.759526  |
| H                                                   | -3.773570 | 1.096122  | 0.858553  |

| Nov 11, 22 15:56            | dimers_structures.xyz         | Page 291/325 |
|-----------------------------|-------------------------------|--------------|
| 28                          |                               |              |
| Dimer 108 of the z...z type |                               |              |
| C                           | -0.864260 -0.523016 -0.853705 |              |
| C                           | -2.032071 -0.114763 0.080512  |              |
| O                           | -0.687306 0.173188 -1.875067  |              |
| O                           | -0.189730 -1.510606 -0.464869 |              |
| H                           | -1.707134 -0.182234 1.117852  |              |
| C                           | -3.244850 -1.010202 -0.162714 |              |
| N                           | -2.365946 1.326024 -0.184808  |              |
| H                           | -1.586279 1.927120 0.119362   |              |
| H                           | -2.948481 -2.042191 0.016760  |              |
| H                           | -3.580901 -0.925367 -1.198202 |              |
| S                           | -4.713404 -0.589455 0.868011  |              |
| H                           | -2.467053 1.470187 -1.194697  |              |
| H                           | -3.226516 1.605337 0.296528   |              |
| H                           | -4.156828 -0.895991 2.057563  |              |
| C                           | 3.650552 -0.857005 0.609258   |              |
| C                           | 2.794062 0.229206 -0.131552   |              |
| O                           | 3.846135 -1.919514 -0.026736  |              |
| O                           | 4.068747 -0.521365 1.736157   |              |
| H                           | 3.481840 0.996982 -0.490209   |              |
| C                           | 1.741458 0.848595 0.778100    |              |
| N                           | 2.162945 -0.399239 -1.340668  |              |
| H                           | 2.865004 -0.957661 -1.829271  |              |
| H                           | 2.237129 1.178353 1.686420    |              |
| H                           | 0.991282 0.106683 1.049274    |              |
| S                           | 0.865975 2.309612 0.029560    |              |
| H                           | 1.380469 -1.039994 -1.057891  |              |
| H                           | 1.745959 0.285865 -1.974296   |              |
| H                           | 1.379260 3.252389 0.842722    |              |
| 28                          |                               |              |
| Dimer 109 of the z...z type |                               |              |
| C                           | 1.006495 -0.282250 -1.237942  |              |
| C                           | 2.001051 -0.020499 -0.071354  |              |
| O                           | 1.216006 -1.290450 -1.934411  |              |
| O                           | 0.094709 0.580814 -1.344412   |              |
| H                           | 1.466360 0.340230 0.804926    |              |
| C                           | 3.056270 0.993551 -0.509335   |              |
| N                           | 2.637576 -1.329890 0.301945   |              |
| H                           | 1.995240 -1.884818 0.874844   |              |
| H                           | 2.547748 1.916986 -0.780607   |              |
| H                           | 3.596662 0.628773 -1.384846   |              |
| S                           | 4.348720 1.333587 0.759607    |              |
| H                           | 2.812952 -1.859381 -0.561509  |              |
| H                           | 3.509358 -1.189772 0.823625   |              |
| H                           | 3.521563 1.870388 1.679845    |              |
| C                           | -3.598168 1.122904 0.253171   |              |
| C                           | -2.844402 -0.248033 0.149818  |              |
| O                           | -3.922757 1.644253 -0.842513  |              |
| O                           | -3.819358 1.522854 1.413082   |              |
| H                           | -3.569911 -1.030595 0.377824  |              |
| C                           | -1.660176 -0.332088 1.102936  |              |
| N                           | -2.414536 -0.441933 -1.277814 |              |
| H                           | -2.387797 -1.423779 -1.547905 |              |
| H                           | -2.012804 -0.170124 2.117370  |              |
| H                           | -0.931917 0.440314 0.860753   |              |
| S                           | -0.750064 -1.942845 1.018458  |              |
| H                           | -3.089443 0.077941 -1.853636  |              |
| H                           | -1.458746 -0.028042 -1.446813 |              |
| H                           | -1.454255 -2.598512 1.960459  |              |
| 28                          |                               |              |
| Dimer 110 of the z...z type |                               |              |
| C                           | -3.454662 -0.407566 -0.853472 |              |
| C                           | -2.638404 0.441037 0.176589   |              |
| O                           | -3.651881 -1.606368 -0.545585 |              |
| O                           | -3.834585 0.222595 -1.863281  |              |
| H                           | -3.319016 1.168215 0.622878   |              |
| C                           | -1.465105 1.157895 -0.484770  |              |
| N                           | -2.147300 -0.452584 1.274394  |              |

| Nov 11, 22 15:56            | dimers_structures.xyz         | Page 292/325 |
|-----------------------------|-------------------------------|--------------|
| H                           | -2.919237 -0.994253 1.661181  |              |
| H                           | -1.840833 1.713661 -1.339779  |              |
| H                           | -0.735247 0.429918 -0.841579  |              |
| S                           | -0.537845 2.300865 0.632993   |              |
| H                           | -1.432054 -1.121962 0.889105  |              |
| H                           | -1.671064 0.068596 2.014672   |              |
| H                           | -1.485154 3.259100 0.683714   |              |
| C                           | 0.902426 -1.128085 0.990595   |              |
| C                           | 2.316702 -0.974702 0.373650   |              |
| O                           | 0.041334 -1.678633 0.240205   |              |
| O                           | 0.733448 -0.631005 2.112466   |              |
| H                           | 3.079948 -1.221825 1.108235   |              |
| C                           | 2.481979 0.466752 -0.112853   |              |
| N                           | 2.452714 -1.936962 -0.775057  |              |
| H                           | 2.670955 -2.880069 -0.450208  |              |
| H                           | 2.359528 1.127845 0.742332    |              |
| H                           | 1.711927 0.715730 -0.845353   |              |
| S                           | 4.079685 0.807210 -0.961290   |              |
| H                           | 1.545511 -1.986642 -1.256741  |              |
| H                           | 3.190226 -1.641092 -1.424681  |              |
| H                           | 4.873030 0.575695 0.104740    |              |
| 28                          |                               |              |
| Dimer 111 of the z...z type |                               |              |
| C                           | -3.498927 -0.640056 -0.067935 |              |
| C                           | -2.088878 0.023448 0.107808   |              |
| O                           | -3.761258 -1.054187 -1.225391 |              |
| O                           | -4.202847 -0.659561 0.958975  |              |
| H                           | -1.570586 -0.474844 0.926519  |              |
| C                           | -2.252131 1.510416 0.403494   |              |
| N                           | -1.305091 -0.218334 -1.146162 |              |
| H                           | -0.587670 -0.982211 -0.980232 |              |
| H                           | -2.899922 1.622443 1.269964   |              |
| H                           | -2.719850 2.019479 -0.442065  |              |
| S                           | -0.670967 2.416395 0.700948   |              |
| H                           | -2.005702 -0.547538 -1.833332 |              |
| H                           | -0.837155 0.618258 -1.493760  |              |
| H                           | -0.355898 1.808791 1.863042   |              |
| C                           | 1.446140 -2.046499 0.186183   |              |
| C                           | 1.907346 -0.571971 0.362345   |              |
| O                           | 2.176911 -2.926487 0.668893   |              |
| O                           | 0.380839 -2.180281 -0.474857  |              |
| H                           | 1.077980 0.042929 0.705816    |              |
| C                           | 2.451817 -0.034610 -0.961541  |              |
| N                           | 2.971011 -0.515700 1.423014   |              |
| H                           | 2.567492 -0.561179 2.359748   |              |
| H                           | 1.686364 -0.153552 -1.725434  |              |
| H                           | 3.326354 -0.607465 -1.275898  |              |
| S                           | 2.998168 1.723122 -0.888242   |              |
| H                           | 3.577854 -1.338315 1.320112   |              |
| H                           | 3.519989 0.348283 1.351358    |              |
| H                           | 1.782732 2.230652 -0.590199   |              |
| 28                          |                               |              |
| Dimer 112 of the z...z type |                               |              |
| C                           | -3.817958 0.746251 -0.364781  |              |
| C                           | -2.459251 0.005847 -0.113999  |              |
| O                           | -3.718718 1.928514 -0.780455  |              |
| O                           | -4.842534 0.069925 -0.150859  |              |
| H                           | -2.327694 -0.713254 -0.924654 |              |
| C                           | -2.430527 -0.717094 1.224220  |              |
| N                           | -1.338804 0.993367 -0.247941  |              |
| H                           | -0.542969 0.565176 -0.798507  |              |
| H                           | -3.264727 -1.413327 1.254366  |              |
| H                           | -2.548979 -0.009990 2.048846  |              |
| S                           | -0.851972 -1.610465 1.574490  |              |
| H                           | -1.751414 1.805801 -0.732626  |              |
| H                           | -0.997122 1.312264 0.658134   |              |
| H                           | -0.826626 -2.334671 0.436780  |              |
| C                           | 1.470426 -0.940126 -1.385778  |              |
| C                           | 2.136793 -0.302757 -0.134220  |              |

| Nov 11, 22 15:56 dimers_structures.xyz Page 293/325 |           |           |           |
|-----------------------------------------------------|-----------|-----------|-----------|
| O                                                   | 2.081289  | -1.870605 | -1.938295 |
| O                                                   | 0.381539  | -0.404497 | -1.724018 |
| H                                                   | 1.407928  | -0.238056 | 0.671877  |
| C                                                   | 2.688539  | 1.079825  | -0.479001 |
| N                                                   | 3.238194  | -1.210401 | 0.339309  |
| H                                                   | 2.864000  | -2.004702 | 0.860347  |
| H                                                   | 1.870183  | 1.690915  | -0.854750 |
| H                                                   | 3.446282  | 1.009808  | -1.262029 |
| S                                                   | 3.514196  | 1.930454  | 0.931445  |
| H                                                   | 3.721041  | -1.595646 | -0.481261 |
| H                                                   | 3.898347  | -0.709843 | 0.944372  |
| H                                                   | 2.419692  | 2.016562  | 1.714934  |
| 28                                                  |           |           |           |
| Dimer 113 of the z...z type                         |           |           |           |
| C                                                   | 1.058858  | -0.936735 | -0.097882 |
| C                                                   | 2.306231  | -0.020261 | -0.057100 |
| O                                                   | 0.597802  | -1.274429 | 1.029734  |
| O                                                   | 0.636488  | -1.243817 | -1.226092 |
| H                                                   | 2.215410  | 0.748382  | -0.822308 |
| C                                                   | 3.577813  | -0.840044 | -0.258935 |
| N                                                   | 2.326582  | 0.678905  | 1.273670  |
| H                                                   | 1.548725  | 1.342196  | 1.327911  |
| H                                                   | 3.505974  | -1.347493 | -1.219454 |
| H                                                   | 3.675710  | -1.597471 | 0.521408  |
| S                                                   | 5.132305  | 0.148208  | -0.185767 |
| H                                                   | 2.173641  | -0.010300 | 2.017542  |
| H                                                   | 3.209936  | 1.175914  | 1.425701  |
| H                                                   | 4.892525  | 0.889765  | -1.286459 |
| C                                                   | -4.272903 | -0.300133 | 0.072717  |
| C                                                   | -2.750290 | 0.043789  | 0.276802  |
| O                                                   | -4.542996 | -1.526250 | 0.024646  |
| O                                                   | -5.042593 | 0.678268  | 0.024718  |
| H                                                   | -2.640554 | 0.338453  | 1.321775  |
| C                                                   | -2.277696 | 1.164631  | -0.638106 |
| N                                                   | -1.960017 | -1.214866 | 0.090576  |
| H                                                   | -1.113187 | -1.299092 | 0.697541  |
| H                                                   | -3.039700 | 1.939774  | -0.645785 |
| H                                                   | -2.156304 | 0.805344  | -1.662088 |
| S                                                   | -0.666454 | 1.957149  | -0.195298 |
| H                                                   | -2.627621 | -1.985361 | 0.242025  |
| H                                                   | -1.585882 | -1.305841 | -0.858378 |
| H                                                   | -1.119925 | 2.634073  | 0.878867  |
| 28                                                  |           |           |           |
| Dimer 114 of the z...z type                         |           |           |           |
| C                                                   | 1.452346  | -0.286140 | -0.297351 |
| C                                                   | 2.757038  | -0.067176 | -1.118059 |
| O                                                   | 0.627899  | 0.671423  | -0.336010 |
| O                                                   | 1.342039  | -1.375720 | 0.289481  |
| H                                                   | 2.606491  | -0.539003 | -2.091351 |
| C                                                   | 4.003758  | -0.647805 | -0.462497 |
| N                                                   | 2.895905  | 1.410971  | -1.367532 |
| H                                                   | 3.409205  | 1.632802  | -2.221110 |
| H                                                   | 4.885582  | -0.484734 | -1.082966 |
| H                                                   | 3.853952  | -1.717773 | -0.339769 |
| S                                                   | 4.388312  | 0.108159  | 1.175376  |
| H                                                   | 1.940119  | 1.794825  | -1.405351 |
| H                                                   | 3.369517  | 1.855346  | -0.572387 |
| H                                                   | 3.280839  | -0.351020 | 1.794084  |
| C                                                   | -3.048264 | -1.248412 | -0.500083 |
| C                                                   | -2.775934 | -0.638366 | 0.914167  |
| O                                                   | -2.106400 | -1.907187 | -0.998612 |
| O                                                   | -4.190579 | -1.032818 | -0.959848 |
| H                                                   | -3.184215 | -1.343927 | 1.643555  |
| C                                                   | -3.432502 | 0.716512  | 1.148594  |
| N                                                   | -1.300719 | -0.581245 | 1.150950  |
| H                                                   | -1.067742 | -0.393301 | 2.125982  |
| H                                                   | -3.186413 | 1.105661  | 2.138309  |
| H                                                   | -4.510284 | 0.585860  | 1.086820  |
| S                                                   | -2.924690 | 2.026169  | -0.046505 |

| Nov 11, 22 15:56 dimers_structures.xyz Page 294/325 |           |           |           |
|-----------------------------------------------------|-----------|-----------|-----------|
| H                                                   | -0.851607 | -1.460197 | 0.870702  |
| H                                                   | -0.799196 | 0.124048  | 0.557439  |
| H                                                   | -3.457868 | 1.419753  | -1.127160 |
| 28                                                  |           |           |           |
| Dimer 115 of the z...z type                         |           |           |           |
| C                                                   | 1.147810  | -1.889687 | -0.218692 |
| C                                                   | 2.008204  | -0.701464 | 0.299817  |
| O                                                   | 1.764609  | -2.930304 | -0.504932 |
| O                                                   | -0.079316 | -1.638580 | -0.346955 |
| H                                                   | 1.487608  | -0.153882 | 1.082545  |
| C                                                   | 2.340580  | 0.219825  | -0.876532 |
| N                                                   | 3.275064  | -1.257196 | 0.889900  |
| H                                                   | 3.126375  | -1.609522 | 1.836457  |
| H                                                   | 1.411622  | 0.601468  | -1.295705 |
| H                                                   | 2.856000  | -0.340154 | -1.659420 |
| S                                                   | 3.462376  | 1.618163  | -0.457611 |
| H                                                   | 3.568519  | -2.054243 | 0.309070  |
| H                                                   | 4.012580  | -0.543734 | 0.921912  |
| H                                                   | 2.604437  | 2.259622  | 0.361597  |
| C                                                   | -3.705676 | -0.268760 | -0.336853 |
| C                                                   | -2.599135 | 0.481039  | 0.481457  |
| O                                                   | -3.959176 | -1.438142 | 0.042866  |
| O                                                   | -4.233408 | 0.396948  | -1.249907 |
| H                                                   | -3.113839 | 1.164503  | 1.159488  |
| C                                                   | -1.631996 | 1.250002  | -0.408170 |
| N                                                   | -1.866091 | -0.520083 | 1.324750  |
| H                                                   | -1.445549 | -0.100355 | 2.152560  |
| H                                                   | -2.196760 | 1.950077  | -1.017524 |
| H                                                   | -1.099358 | 0.562364  | -1.066832 |
| S                                                   | -0.312752 | 2.148662  | 0.520890  |
| H                                                   | -2.540433 | -1.247728 | 1.585720  |
| H                                                   | -1.107791 | -0.978759 | 0.752394  |
| H                                                   | -1.120604 | 2.996993  | 1.187968  |
| 28                                                  |           |           |           |
| Dimer 116 of the z...z type                         |           |           |           |
| C                                                   | -1.073810 | -1.103815 | -0.163387 |
| C                                                   | -2.626917 | -1.219899 | -0.203607 |
| O                                                   | -0.520138 | -1.427717 | 0.905578  |
| O                                                   | -0.556235 | -0.695739 | -1.231926 |
| H                                                   | -2.872725 | -2.157527 | -0.706191 |
| C                                                   | -3.310427 | -0.063826 | -0.925130 |
| N                                                   | -3.103058 | -1.345917 | 1.218363  |
| H                                                   | -3.970304 | -1.874776 | 1.312372  |
| H                                                   | -4.392426 | -0.199561 | -0.947211 |
| H                                                   | -2.938209 | -0.038280 | -1.946374 |
| S                                                   | -3.021170 | 1.571819  | -0.122771 |
| H                                                   | -2.339395 | -1.794586 | 1.746062  |
| H                                                   | -3.239288 | -0.411678 | 1.622598  |
| H                                                   | -1.680285 | 1.583555  | -0.296819 |
| C                                                   | 3.032403  | -0.874897 | 0.204970  |
| C                                                   | 2.874380  | 0.447443  | -0.619650 |
| O                                                   | 2.919698  | -1.925275 | -0.472761 |
| O                                                   | 3.300692  | -0.742838 | 1.416083  |
| H                                                   | 3.851236  | 0.632515  | -1.076681 |
| C                                                   | 2.507368  | 1.687711  | 0.181631  |
| N                                                   | 1.922501  | 0.180635  | -1.748056 |
| H                                                   | 1.832906  | 0.977997  | -2.377458 |
| H                                                   | 2.567435  | 2.582836  | -0.440602 |
| H                                                   | 3.236032  | 1.773507  | 0.985210  |
| S                                                   | 0.810436  | 1.708813  | 0.899225  |
| H                                                   | 2.273850  | -0.623723 | -2.271604 |
| H                                                   | 0.954646  | -0.110117 | -1.413125 |
| H                                                   | 0.782058  | 0.422958  | 1.309650  |
| 28                                                  |           |           |           |
| Dimer 117 of the z...z type                         |           |           |           |
| C                                                   | -2.691190 | 1.367294  | -0.174132 |
| C                                                   | -2.161575 | -0.083924 | -0.372664 |
| O                                                   | -2.612073 | 1.835675  | 0.985540  |
| O                                                   | -3.159310 | 1.892216  | -1.208410 |

| Nov 11, 22 15:56            | dimers_structures.xyz |           | Page 295/325 |
|-----------------------------|-----------------------|-----------|--------------|
| H -1.341500                 | -0.068536             | -1.092217 |              |
| C -3.246726                 | -1.023872             | -0.890006 |              |
| N -1.571341                 | -0.578810             | 0.909706  |              |
| H -1.237970                 | -1.539434             | 0.818060  |              |
| H -2.855098                 | -2.031760             | -1.039898 |              |
| H -3.600624                 | -0.642603             | -1.845568 |              |
| S -4.683101                 | -1.223746             | 0.253809  |              |
| H -0.719601                 | -0.000713             | 1.122821  |              |
| H -2.251613                 | -0.501785             | 1.666788  |              |
| H -5.120462                 | 0.049330              | 0.166160  |              |
| C 1.368978                  | -0.169854             | 0.031161  |              |
| C 2.819839                  | 0.164189              | -0.403212 |              |
| O 0.855423                  | 0.623072              | 0.873391  |              |
| O 0.874401                  | -1.198301             | -0.457912 |              |
| H 2.912983                  | 0.075730              | -1.483629 |              |
| C 3.791260                  | -0.785826             | 0.299093  |              |
| N 3.122576                  | 1.592272              | -0.035149 |              |
| H 2.722919                  | 2.244962              | -0.710739 |              |
| H 3.527822                  | -1.804069             | 0.020009  |              |
| H 3.700071                  | -0.692881             | 1.383163  |              |
| S 5.566778                  | -0.464948             | -0.072634 |              |
| H 2.680443                  | 1.791375              | 0.871036  |              |
| H 4.134555                  | 1.756621              | 0.012405  |              |
| H 5.499566                  | -0.740712             | -1.391404 |              |
| 28                          |                       |           |              |
| Dimer 118 of the z...z type |                       |           |              |
| C -1.040408                 | 2.089556              | -0.023217 |              |
| C -1.571373                 | 0.624733              | 0.047316  |              |
| O -1.231601                 | 2.792339              | 1.000047  |              |
| O -0.481529                 | 2.386671              | -1.097707 |              |
| H -0.766028                 | -0.039258             | -0.243750 |              |
| C -2.741317                 | 0.398816              | -0.900443 |              |
| N -1.922141                 | 0.304092              | 1.470347  |              |
| H -1.145718                 | -0.266189             | 1.883934  |              |
| H -2.417158                 | 0.667037              | -1.903930 |              |
| H -3.597505                 | 1.020257              | -0.630769 |              |
| S -3.352233                 | -1.349021             | -0.875224 |              |
| H -1.989516                 | 1.212629              | 1.954300  |              |
| H -2.793325                 | -0.222765             | 1.553038  |              |
| H -2.130494                 | -1.928728             | -0.864233 |              |
| C 0.727532                  | -1.555109             | 0.863173  |              |
| C 2.132805                  | -1.086912             | 0.396027  |              |
| O 0.079993                  | -2.277358             | 0.077961  |              |
| O 0.365904                  | -1.065534             | 1.963217  |              |
| H 2.866525                  | -1.259820             | 1.181102  |              |
| C 2.073041                  | 0.401545              | 0.038774  |              |
| N 2.539928                  | -1.902835             | -0.800777 |              |
| H 2.910664                  | -2.812956             | -0.523909 |              |
| H 1.741353                  | 0.943888              | 0.921834  |              |
| H 1.353458                  | 0.596566              | -0.759062 |              |
| S 3.663246                  | 1.097287              | -0.572773 |              |
| H 1.700613                  | -2.082615             | -1.365924 |              |
| H 3.254066                  | -1.420374             | -1.357090 |              |
| H 4.368528                  | 0.886560              | 0.557498  |              |
| 28                          |                       |           |              |
| Dimer 119 of the z...z type |                       |           |              |
| C -0.992744                 | 0.076242              | -0.153854 |              |
| C -2.410300                 | 0.000469              | 0.470586  |              |
| O -0.585890                 | 1.200172              | -0.506594 |              |
| O -0.409978                 | -1.032552             | -0.272753 |              |
| H -2.398230                 | -0.632278             | 1.355394  |              |
| C -3.392540                 | -0.544705             | -0.567290 |              |
| N -2.806701                 | 1.387122              | 0.898502  |              |
| H -2.424821                 | 1.619661              | 1.816454  |              |
| H -3.054506                 | -1.535899             | -0.863036 |              |
| H -3.405389                 | 0.092436              | -1.454211 |              |
| S -5.139862                 | -0.615260             | 0.011125  |              |
| H -2.398518                 | 2.049454              | 0.224552  |              |
| H -3.826624                 | 1.489692              | 0.939894  |              |

| Nov 11, 22 15:56            | dimers_structures.xyz |           | Page 296/325 |
|-----------------------------|-----------------------|-----------|--------------|
| H -4.931931                 | -1.495433             | 1.011943  |              |
| C 3.201404                  | -1.621480             | 0.391692  |              |
| C 2.941478                  | -0.252844             | -0.321169 |              |
| O 2.820103                  | -2.640399             | -0.231708 |              |
| O 3.800497                  | -1.546590             | 1.485943  |              |
| H 3.886369                  | 0.050907              | -0.777329 |              |
| C 2.450180                  | 0.836798              | 0.623943  |              |
| N 1.954235                  | -0.455357             | -1.429556 |              |
| H 2.269489                  | -1.207289             | -2.041713 |              |
| H 3.113090                  | 0.873473              | 1.484145  |              |
| H 1.440600                  | 0.618509              | 0.969152  |              |
| S 2.352445                  | 2.511491              | -0.152078 |              |
| H 1.012948                  | -0.739861             | -1.021004 |              |
| H 1.818285                  | 0.403134              | -1.966251 |              |
| H 3.682432                  | 2.739517              | -0.167931 |              |
| 28                          |                       |           |              |
| Dimer 120 of the z...z type |                       |           |              |
| C -3.197976                 | 0.698192              | 0.532835  |              |
| C -3.062368                 | -0.368619             | -0.606528 |              |
| O -3.165175                 | 1.887469              | 0.140031  |              |
| O -3.358537                 | 0.248985              | 1.686677  |              |
| H -4.068233                 | -0.506803             | -1.014068 |              |
| C -2.566016                 | -1.739846             | -0.174756 |              |
| N -2.242771                 | 0.229860              | -1.712307 |              |
| H -2.206059                 | -0.366217             | -2.539270 |              |
| H -2.501146                 | -2.420226             | -1.025777 |              |
| H -3.291307                 | -2.138982             | 0.530881  |              |
| S -0.908288                 | -1.800282             | 0.626178  |              |
| H -2.665469                 | 1.127254              | -1.962106 |              |
| H -1.259389                 | 0.471421              | -1.413704 |              |
| H -1.140684                 | -0.826349             | 1.529825  |              |
| C 0.829905                  | 1.133022              | -0.034603 |              |
| C 1.992810                  | 0.109927              | 0.106774  |              |
| O 0.234040                  | 1.118195              | -1.153132 |              |
| O 0.632224                  | 1.859808              | 0.945247  |              |
| H 1.874987                  | -0.432992             | 1.043760  |              |
| C 3.343848                  | 0.818332              | 0.070080  |              |
| N 1.885002                  | -0.900318             | -0.999331 |              |
| H 1.034444                  | -1.459141             | -0.850256 |              |
| H 3.358286                  | 1.560965              | 0.865351  |              |
| H 3.484677                  | 1.333686              | -0.882253 |              |
| S 4.790577                  | -0.313085             | 0.237661  |              |
| H 1.768580                  | -0.417803             | -1.894855 |              |
| H 2.704471                  | -1.514234             | -1.032489 |              |
| H 4.512977                  | -0.725209             | 1.491593  |              |
| 28                          |                       |           |              |
| Dimer 121 of the z...z type |                       |           |              |
| C 1.062276                  | -0.183198             | -0.115768 |              |
| C 2.496007                  | 0.066602              | 0.419780  |              |
| O 0.530475                  | -1.273900             | 0.169889  |              |
| O 0.597276                  | 0.746787              | -0.824633 |              |
| H 2.572707                  | 1.067670              | 0.839195  |              |
| C 3.500837                  | -0.116913             | -0.719345 |              |
| N 2.761594                  | -0.918788             | 1.525304  |              |
| H 2.377872                  | -0.597290             | 2.415058  |              |
| H 3.268837                  | 0.612416              | -1.492891 |              |
| H 3.411923                  | -1.115464             | -1.152369 |              |
| S 5.263414                  | 0.038631              | -0.207011 |              |
| H 2.276839                  | -1.794812             | 1.287617  |              |
| H 3.767555                  | -1.080123             | 1.648532  |              |
| H 5.193235                  | 1.325588              | 0.190612  |              |
| C -3.435862                 | -1.416451             | 0.061783  |              |
| C -2.494607                 | -0.169287             | -0.001177 |              |
| O -3.367684                 | -2.195771             | -0.922263 |              |
| O -4.122753                 | -1.519648             | 1.098146  |              |
| H -1.643694                 | -0.389534             | 0.644944  |              |
| C -3.179558                 | 1.111398              | 0.450897  |              |
| N -1.925831                 | -0.052275             | -1.382917 |              |
| H -0.924124                 | 0.282071              | -1.331444 |              |

| Nov 11, 22 15:56 dimers_structures.xyz Page 297/325 |           |           |           |
|-----------------------------------------------------|-----------|-----------|-----------|
| H                                                   | -3.481016 | 0.982220  | 1.487190  |
| H                                                   | -4.076274 | 1.303114  | -0.142416 |
| S                                                   | -2.137217 | 2.633227  | 0.274890  |
| H                                                   | -1.989316 | -0.994861 | -1.790777 |
| H                                                   | -2.470762 | 0.580031  | -1.968531 |
| H                                                   | -0.946349 | 2.054036  | 0.536377  |
| 28                                                  |           |           |           |
| Dimer 122 of the z...z type                         |           |           |           |
| C                                                   | -0.993872 | 0.310360  | -1.318638 |
| C                                                   | -2.457646 | 0.315700  | -0.809753 |
| O                                                   | -0.494937 | -0.833812 | -1.536988 |
| O                                                   | -0.433578 | 1.413003  | -1.390986 |
| H                                                   | -3.038862 | 1.061299  | -1.349565 |
| C                                                   | -2.464584 | 0.613386  | 0.691535  |
| N                                                   | -3.081347 | -1.028043 | -1.079448 |
| H                                                   | -3.345840 | -1.126264 | -2.060592 |
| H                                                   | -1.992235 | 1.581419  | 0.845314  |
| H                                                   | -1.889033 | -0.138729 | 1.235229  |
| S                                                   | -4.139298 | 0.593910  | 1.457990  |
| H                                                   | -2.387346 | -1.758937 | -0.883586 |
| H                                                   | -3.918548 | -1.168019 | -0.502135 |
| H                                                   | -4.636012 | 1.639127  | 0.765089  |
| C                                                   | 3.019632  | 1.398747  | 0.412809  |
| C                                                   | 2.114560  | 0.147970  | 0.159051  |
| O                                                   | 3.390074  | 2.016034  | -0.616733 |
| O                                                   | 3.241023  | 1.664050  | 1.611607  |
| H                                                   | 1.092859  | 0.460010  | 0.372343  |
| C                                                   | 2.491693  | -1.039903 | 1.031188  |
| N                                                   | 2.136221  | -0.190192 | -1.300768 |
| H                                                   | 1.190694  | -0.539653 | -1.597105 |
| H                                                   | 2.367203  | -0.744685 | 2.069861  |
| H                                                   | 3.537903  | -1.314336 | 0.879400  |
| S                                                   | 1.525740  | -2.581075 | 0.683391  |
| H                                                   | 2.371273  | 0.684046  | -1.788435 |
| H                                                   | 2.852261  | -0.881715 | -1.521565 |
| H                                                   | 0.349146  | -1.983034 | 0.402799  |
| 28                                                  |           |           |           |
| Dimer 123 of the z...z type                         |           |           |           |
| C                                                   | -0.978533 | 0.736557  | -1.184279 |
| C                                                   | -2.445883 | 0.632968  | -0.694256 |
| O                                                   | -0.510693 | -0.318350 | -1.710562 |
| O                                                   | -0.386291 | 1.796321  | -0.943337 |
| H                                                   | -2.995728 | 1.537922  | -0.943915 |
| C                                                   | -2.438586 | 0.407613  | 0.820080  |
| N                                                   | -3.114266 | -0.519308 | -1.395226 |
| H                                                   | -3.433224 | -0.254952 | -2.328292 |
| H                                                   | -1.938243 | 1.255245  | 1.284173  |
| H                                                   | -1.880885 | -0.496579 | 1.072994  |
| S                                                   | -4.107407 | 0.169682  | 1.560037  |
| H                                                   | -2.418325 | -1.267192 | -1.513888 |
| H                                                   | -3.923350 | -0.859306 | -0.862692 |
| H                                                   | -4.581479 | 1.397639  | 1.265724  |
| C                                                   | 3.174479  | 1.134206  | 0.651489  |
| C                                                   | 2.142099  | 0.060397  | 0.172575  |
| O                                                   | 3.642817  | 1.873516  | -0.250563 |
| O                                                   | 3.390104  | 1.159000  | 1.879642  |
| H                                                   | 1.156011  | 0.438970  | 0.441963  |
| C                                                   | 2.372305  | -1.301968 | 0.809452  |
| N                                                   | 2.158450  | -0.000080 | -1.325572 |
| H                                                   | 1.180921  | -0.139169 | -1.686992 |
| H                                                   | 2.258287  | -1.191833 | 1.884847  |
| H                                                   | 3.386002  | -1.656246 | 0.609840  |
| S                                                   | 1.255332  | -2.639054 | 0.181701  |
| H                                                   | 2.551941  | 0.899863  | -1.634297 |
| H                                                   | 2.761763  | -0.745893 | -1.671229 |
| H                                                   | 0.157430  | -1.875348 | 0.007717  |
| 28                                                  |           |           |           |
| Dimer 124 of the z...z type                         |           |           |           |
| C                                                   | -1.802326 | -1.533412 | -0.267946 |

| Nov 11, 22 15:56 dimers_structures.xyz Page 298/325 |           |           |           |
|-----------------------------------------------------|-----------|-----------|-----------|
| C                                                   | -2.126218 | -0.162707 | -0.944075 |
| O                                                   | -2.525348 | -2.488228 | -0.607069 |
| O                                                   | -0.835458 | -1.539862 | 0.534716  |
| H                                                   | -1.465668 | -0.067494 | -1.808921 |
| C                                                   | -1.958461 | 1.059065  | -0.050697 |
| N                                                   | -3.530457 | -0.259538 | -1.477217 |
| H                                                   | -3.695708 | 0.325287  | -2.296702 |
| H                                                   | -2.258666 | 1.966037  | -0.578010 |
| H                                                   | -0.909945 | 1.171150  | 0.205661  |
| S                                                   | -2.973366 | 1.006279  | 1.484962  |
| H                                                   | -3.688458 | -1.254994 | -1.698447 |
| H                                                   | -4.203648 | -0.001988 | -0.747098 |
| H                                                   | -2.355301 | -0.070768 | 2.012548  |
| C                                                   | 3.267079  | -1.188430 | 0.039843  |
| C                                                   | 2.128436  | -0.119860 | -0.086887 |
| O                                                   | 3.421587  | -1.683586 | 1.184899  |
| O                                                   | 3.901683  | -1.407246 | -1.009466 |
| H                                                   | 1.461495  | -0.417591 | -0.895125 |
| C                                                   | 2.731481  | 1.251261  | -0.377013 |
| N                                                   | 1.335893  | -0.130695 | 1.185334  |
| H                                                   | 0.422258  | -0.628087 | 1.025173  |
| H                                                   | 3.323574  | 1.180828  | -1.286638 |
| H                                                   | 3.389622  | 1.560615  | 0.438003  |
| S                                                   | 1.491940  | 2.609273  | -0.536710 |
| H                                                   | 1.911936  | -0.671919 | 1.852635  |
| H                                                   | 1.148370  | 0.803281  | 1.551179  |
| H                                                   | 0.845250  | 2.104308  | -1.607107 |
| 28                                                  |           |           |           |
| Dimer 125 of the z...z type                         |           |           |           |
| C                                                   | 2.596916  | -1.727874 | -0.374186 |
| C                                                   | 2.771213  | -0.176025 | -0.434442 |
| O                                                   | 1.877261  | -2.163139 | 0.556003  |
| O                                                   | 3.236181  | -2.358714 | -1.242522 |
| H                                                   | 2.708631  | 0.155944  | -1.470179 |
| C                                                   | 4.131453  | 0.193780  | 0.155206  |
| N                                                   | 1.661616  | 0.477507  | 0.316897  |
| H                                                   | 0.744799  | 0.445856  | -0.218017 |
| H                                                   | 4.905713  | -0.332316 | -0.399792 |
| H                                                   | 4.188699  | -0.113303 | 1.201881  |
| S                                                   | 4.495940  | 2.004093  | 0.161758  |
| H                                                   | 1.467865  | -0.049537 | 1.174655  |
| H                                                   | 1.880588  | 1.448944  | 0.548648  |
| H                                                   | 4.486154  | 2.165887  | -1.177311 |
| C                                                   | -1.441379 | -0.012326 | 0.271705  |
| C                                                   | -2.932505 | -0.365232 | 0.029016  |
| O                                                   | -1.053559 | 0.044015  | 1.455601  |
| O                                                   | -0.783040 | 0.218546  | -0.776555 |
| H                                                   | -3.012679 | -1.149453 | -0.722162 |
| C                                                   | -3.692880 | 0.885168  | -0.415018 |
| N                                                   | -3.509865 | -0.903566 | 1.310183  |
| H                                                   | -3.234492 | -1.874497 | 1.464236  |
| H                                                   | -3.240211 | 1.245970  | -1.336226 |
| H                                                   | -3.608998 | 1.670883  | 0.338624  |
| S                                                   | -5.501920 | 0.628248  | -0.652383 |
| H                                                   | -3.129553 | -0.359693 | 2.094079  |
| H                                                   | -4.534890 | -0.854549 | 1.302537  |
| H                                                   | -5.399840 | -0.245784 | -1.674450 |
| 28                                                  |           |           |           |
| Dimer 126 of the z...z type                         |           |           |           |
| C                                                   | -1.636072 | -2.033373 | 0.111249  |
| C                                                   | -2.062133 | -0.645178 | -0.457610 |
| O                                                   | -2.503528 | -2.925618 | 0.092403  |
| O                                                   | -0.466422 | -2.094395 | 0.567139  |
| H                                                   | -1.316988 | -0.276060 | -1.159838 |
| C                                                   | -2.246424 | 0.347347  | 0.695212  |
| N                                                   | -3.349140 | -0.837152 | -1.211394 |
| H                                                   | -3.180055 | -1.106904 | -2.180722 |
| H                                                   | -1.272199 | 0.542701  | 1.137998  |
| H                                                   | -2.899124 | -0.072344 | 1.462917  |

| Nov 11, 22 15:56            | dimers_structures.xyz |           | Page 299/325 |
|-----------------------------|-----------------------|-----------|--------------|
| S                           | -3.034073             | 1.942811  | 0.222428     |
| H                           | -3.848001             | -1.619066 | -0.761185    |
| H                           | -3.916189             | 0.019134  | -1.207615    |
| H                           | -2.071179             | 2.356237  | -0.624562    |
| C                           | 3.537442              | -0.750009 | -0.339455    |
| C                           | 2.178770              | 0.003430  | -0.129951    |
| O                           | 3.917810              | -1.461418 | 0.624910     |
| O                           | 4.090625              | -0.543252 | -1.436045    |
| H                           | 1.504120              | -0.272262 | -0.940053    |
| C                           | 2.409728              | 1.510247  | -0.125064    |
| N                           | 1.573104              | -0.475449 | 1.154627     |
| H                           | 0.727738              | -1.078942 | 0.966788     |
| H                           | 2.917573              | 1.786570  | -1.046150    |
| H                           | 3.045603              | 1.798630  | 0.715016     |
| S                           | 0.870640              | 2.513415  | 0.057746     |
| H                           | 2.317174              | -1.045738 | 1.594430     |
| H                           | 1.302941              | 0.284108  | 1.778802     |
| H                           | 0.340003              | 2.175206  | -1.134769    |
| 28                          |                       |           |              |
| Dimer 127 of the z...z type |                       |           |              |
| C                           | -2.510542             | -1.710946 | 0.406458     |
| C                           | -2.731486             | -0.163478 | 0.416889     |
| O                           | -1.841191             | -2.162215 | -0.553480    |
| O                           | -3.068945             | -2.324684 | 1.339940     |
| H                           | -2.612466             | 0.212403  | 1.432432     |
| C                           | -4.139658             | 0.138260  | -0.094050    |
| N                           | -1.694316             | 0.489601  | -0.433249    |
| H                           | -0.760328             | 0.551238  | 0.071012     |
| H                           | -4.857220             | -0.386492 | 0.533661     |
| H                           | -4.255554             | -0.215661 | -1.120874    |
| S                           | -4.563309             | 1.934388  | -0.151757    |
| H                           | -1.509025             | -0.101451 | -1.250847    |
| H                           | -1.979125             | 1.425144  | -0.731189    |
| H                           | -4.460366             | 2.157371  | 1.174527     |
| C                           | 1.430583              | 0.040867  | -0.312177    |
| C                           | 2.898482              | -0.329651 | 0.024979     |
| O                           | 1.085144              | -0.026404 | -1.508112    |
| O                           | 0.746117              | 0.411488  | 0.677867     |
| H                           | 2.927219              | -0.992997 | 0.887081     |
| C                           | 3.697813              | 0.944596  | 0.301178     |
| N                           | 3.479466              | -1.076589 | -1.145013    |
| H                           | 3.193295              | -2.056495 | -1.141092    |
| H                           | 3.232332              | 1.457715  | 1.140249     |
| H                           | 3.670843              | 1.609818  | -0.564445    |
| S                           | 5.485241              | 0.659552  | 0.644308     |
| H                           | 3.107574              | -0.660715 | -2.008459    |
| H                           | 4.504772              | -1.040588 | -1.138143    |
| H                           | 5.310930              | -0.056791 | 1.773733     |
| 28                          |                       |           |              |
| Dimer 128 of the z...z type |                       |           |              |
| C                           | 3.714335              | -1.031530 | -0.424610    |
| C                           | 2.462504              | -0.131547 | -0.158361    |
| O                           | 4.184831              | -1.624082 | 0.578491     |
| O                           | 4.116535              | -1.033390 | -1.604869    |
| H                           | 1.679484              | -0.386082 | -0.871613    |
| C                           | 2.842450              | 1.338956  | -0.300129    |
| N                           | 1.930401              | -0.445668 | 1.205793     |
| H                           | 1.121171              | -1.095545 | 1.102034     |
| H                           | 3.274603              | 1.485008  | -1.287876    |
| H                           | 3.587411              | 1.620026  | 0.447530     |
| S                           | 1.436467              | 2.508285  | -0.049444    |
| H                           | 2.698623              | -0.885295 | 1.730994     |
| H                           | 1.550897              | 0.372319  | 1.689458     |
| H                           | 0.637555              | 1.988421  | -1.003646    |
| C                           | -1.110678             | -0.381104 | 0.776443     |
| C                           | -2.322849             | 0.044103  | -0.094426    |
| O                           | -0.455775             | -1.376334 | 0.347952     |
| O                           | -0.916690             | 0.279532  | 1.807214     |
| H                           | -2.337014             | 1.126928  | -0.201921    |

| Nov 11, 22 15:56            | dimers_structures.xyz |           | Page 300/325 |
|-----------------------------|-----------------------|-----------|--------------|
| C                           | -3.615647             | -0.453112 | 0.552665     |
| N                           | -2.158169             | -0.551964 | -1.467155    |
| H                           | -1.538047             | 0.011941  | -2.049625    |
| H                           | -3.686035             | -0.015885 | 1.546749     |
| H                           | -3.597818             | -1.540129 | 0.656043     |
| S                           | -5.139219             | -0.079057 | -0.413909    |
| H                           | -1.711220             | -1.471974 | -1.355590    |
| H                           | -3.059779             | -0.638443 | -1.949211    |
| H                           | -5.033303             | 1.264081  | -0.349929    |
| 28                          |                       |           |              |
| Dimer 129 of the z...z type |                       |           |              |
| C                           | 2.177515              | -1.235026 | 0.466668     |
| C                           | 2.587608              | 0.231791  | 0.827048     |
| O                           | 3.054249              | -1.908847 | -0.128331    |
| O                           | 1.037245              | -1.571901 | 0.838044     |
| H                           | 2.767207              | 0.258435  | 1.902942     |
| C                           | 1.532946              | 1.273294  | 0.478069     |
| N                           | 3.904844              | 0.507145  | 0.148856     |
| H                           | 4.552750              | 1.058427  | 0.710268     |
| H                           | 1.831071              | 2.264502  | 0.823229     |
| H                           | 0.598331              | 1.001504  | 0.964138     |
| S                           | 1.250936              | 1.462331  | -1.337152    |
| H                           | 4.291186              | -0.430228 | -0.067234    |
| H                           | 3.750622              | 0.983906  | -0.746465    |
| H                           | 0.837022              | 0.197213  | -1.560672    |
| C                           | -2.199753             | 0.306890  | 1.406199     |
| C                           | -2.930139             | 0.454173  | 0.028025     |
| O                           | -1.471946             | 1.283448  | 1.724210     |
| O                           | -2.451554             | -0.731006 | 2.040815     |
| H                           | -3.940659             | 0.805226  | 0.248514     |
| C                           | -3.022384             | -0.833884 | -0.778737    |
| N                           | -2.244086             | 1.559040  | -0.727269    |
| H                           | -2.866621             | 2.097969  | -1.328199    |
| H                           | -3.643389             | -0.696718 | -1.665295    |
| H                           | -3.481291             | -1.586121 | -0.140910    |
| S                           | -1.407709             | -1.461235 | -1.408415    |
| H                           | -1.813264             | 2.154407  | 0.001025     |
| H                           | -1.473598             | 1.188154  | -1.296510    |
| H                           | -0.745023             | -1.534481 | -0.228418    |
| 28                          |                       |           |              |
| Dimer 130 of the z...z type |                       |           |              |
| C                           | -1.862647             | 1.140563  | 0.848075     |
| C                           | -2.883526             | -0.032052 | 0.665706     |
| O                           | -2.202097             | 2.231027  | 0.330285     |
| O                           | -0.850915             | 0.868841  | 1.525218     |
| H                           | -3.441596             | -0.111970 | 1.600705     |
| C                           | -2.248629             | -1.379117 | 0.342217     |
| N                           | -3.859038             | 0.391264  | -0.398219    |
| H                           | -4.813097             | 0.069291  | -0.240689    |
| H                           | -2.997946             | -2.171976 | 0.344752     |
| H                           | -1.508580             | -1.599198 | 1.107723     |
| S                           | -1.468094             | -1.448169 | -1.325363    |
| H                           | -3.805590             | 1.425251  | -0.413871    |
| H                           | -3.534973             | 0.049009  | -1.311960    |
| H                           | -0.554566             | -0.453264 | -1.157958    |
| C                           | 1.861902              | 1.141876  | -0.846832    |
| C                           | 2.883402              | -0.030286 | -0.665018    |
| O                           | 2.200692              | 2.232232  | -0.328386    |
| O                           | 0.850386              | 0.869974  | -1.524228    |
| H                           | 3.441566              | -0.109431 | -1.600027    |
| C                           | 2.249207              | -1.377858 | -0.342247    |
| N                           | 3.858626              | 0.393008  | 0.399180     |
| H                           | 4.812880              | 0.071682  | 0.241511     |
| H                           | 2.998946              | -2.170316 | -0.345161    |
| H                           | 1.509293              | -1.597929 | -1.107888    |
| S                           | 1.468633              | -1.448152 | 1.325265     |
| H                           | 3.804575              | 1.426955  | 0.415394     |
| H                           | 3.534724              | 0.050067  | 1.312721     |
| H                           | 0.554584              | -0.453654 | 1.158271     |

| Nov 11, 22 15:56            | dimers_structures.xyz | Page 301/325 |
|-----------------------------|-----------------------|--------------|
| 28                          |                       |              |
| Dimer 131 of the z...z type |                       |              |
| C 1.861950                  | 1.481505              | -0.876693    |
| C 1.850937                  | -0.025025             | -0.482284    |
| O 2.957096                  | 1.940830              | -1.269883    |
| O 0.766037                  | 2.066651              | -0.719945    |
| H 0.996541                  | -0.533889             | -0.924427    |
| C 1.811317                  | -0.163566             | 1.036897     |
| N 3.096996                  | -0.672262             | -1.028859    |
| H 2.974089                  | -0.957954             | -2.000785    |
| H 0.988958                  | 0.440507              | 1.412044     |
| H 2.730634                  | 0.217786              | 1.486219     |
| S 1.638031                  | -1.908732             | 1.609988     |
| H 3.839706                  | 0.041309              | -1.017438    |
| H 3.367529                  | -1.498653             | -0.486646    |
| H 0.564968                  | -2.184061             | 0.824554     |
| C -1.861924                 | -1.481539             | -0.876678    |
| C -1.850925                 | 0.024980              | -0.482256    |
| O -2.956971                 | -1.940818             | -1.270103    |
| O -0.766065                 | -2.066722             | -0.719741    |
| H -0.996514                 | 0.533839              | -0.924382    |
| C -1.811347                 | 0.163572              | 1.036918     |
| N -3.096928                 | 0.672280              | -1.028872    |
| H -2.974165                 | 0.957416              | -2.000974    |
| H -0.988982                 | -0.440465             | 1.412106     |
| H -2.730662                 | -0.217786             | 1.486238     |
| S -1.638119                 | 1.908767              | 1.609948     |
| H -3.839902                 | -0.040966             | -1.016942    |
| H -3.367038                 | 1.499026              | -0.487011    |
| H -0.565050                 | 2.184108              | 0.824542     |
| 28                          |                       |              |
| Dimer 132 of the z...z type |                       |              |
| C 1.643706                  | 1.462882              | 0.048602     |
| C 2.955146                  | 0.615527              | 0.106324     |
| O 1.150886                  | 1.765301              | 1.166165     |
| O 1.242752                  | 1.762057              | -1.090474    |
| H 3.785138                  | 1.305214              | -0.059134    |
| C 3.027191                  | -0.510241             | -0.919518    |
| N 3.085384                  | 0.099946              | 1.514369     |
| H 4.046190                  | 0.049340              | 1.851184     |
| H 4.013094                  | -0.976833             | -0.911582    |
| H 2.850998                  | -0.079535             | -1.902567    |
| S 1.825743                  | -1.877307             | -0.619228    |
| H 2.515001                  | 0.748886              | 2.086440     |
| H 2.653508                  | -0.829655             | 1.583650     |
| H 0.684598                  | -1.240978             | -1.011013    |
| C -1.943276                 | -0.012641             | -1.349688    |
| C -1.677949                 | 0.765857              | -0.026894    |
| O -2.903256                 | 0.406873              | -2.039758    |
| O -1.158015                 | -0.954197             | -1.595065    |
| H -0.891692                 | 1.491039              | -0.239272    |
| C -1.246743                 | -0.093826             | 1.150220     |
| N -2.927792                 | 1.544368              | 0.289270     |
| H -2.748908                 | 2.418427              | 0.783253     |
| H -1.084306                 | 0.519229              | 2.036176     |
| H -0.304572                 | -0.571290             | 0.904919     |
| S -2.480399                 | -1.383628             | 1.617912     |
| H -3.384657                 | 1.716927              | -0.621173    |
| H -3.570931                 | 0.973642              | 0.848331     |
| H -2.404420                 | -2.061961             | 0.453963     |
| 28                          |                       |              |
| Dimer 133 of the z...z type |                       |              |
| C 1.424365                  | -1.426893             | -0.089091    |
| C 2.685685                  | -0.808852             | 0.594896     |
| O 1.604919                  | -1.950188             | -1.203570    |
| O 0.364574                  | -1.356965             | 0.582495     |
| H 3.050982                  | -1.553734             | 1.304828     |
| C 2.420292                  | 0.494147              | 1.338329     |
| N 3.743686                  | -0.652643             | -0.462558    |

| Nov 11, 22 15:56            | dimers_structures.xyz | Page 302/325 |
|-----------------------------|-----------------------|--------------|
| H 4.693094                  | -0.783304             | -0.113401    |
| H 3.303628                  | 0.821343              | 1.887897     |
| H 1.624371                  | 0.307894              | 2.056000     |
| S 1.981122                  | 1.912156              | 0.239182     |
| H 3.522063                  | -1.348358             | -1.192898    |
| H 3.677267                  | 0.278340              | -0.891240    |
| H 1.028142                  | 1.278686              | -0.497197    |
| C -3.120283                 | -0.586553             | 0.538566     |
| C -2.416354                 | 0.813199              | 0.478550     |
| O -2.962832                 | -1.195847             | 1.623559     |
| O -3.785020                 | -0.914263             | -0.464116    |
| H -3.091877                 | 1.515990              | 0.974487     |
| C -2.143144                 | 1.356581              | -0.915827    |
| N -1.181464                 | 0.740538              | 1.334852     |
| H -0.678210                 | 1.628344              | 1.378545     |
| H -1.802355                 | 2.392790              | -0.868538    |
| H -3.086910                 | 1.322287              | -1.455723    |
| S -0.854555                 | 0.471996              | -1.897839    |
| H -1.464503                 | 0.461755              | 2.276640     |
| H -0.531060                 | -0.018504             | 1.003542     |
| H -1.075774                 | -0.767903             | -1.418038    |
| 28                          |                       |              |
| Dimer 134 of the z...z type |                       |              |
| C 1.935206                  | -0.136302             | -1.334927    |
| C 1.691059                  | -0.771991             | 0.066493     |
| O 2.878527                  | -0.635254             | -1.994132    |
| O 1.154200                  | 0.783154              | -1.664104    |
| H 0.920846                  | -1.533212             | -0.063381    |
| C 1.244477                  | 0.195436              | 1.149938     |
| N 2.959293                  | -1.485083             | 0.456720     |
| H 2.801272                  | -2.294882             | 1.056219     |
| H 1.111636                  | -0.324043             | 2.098527     |
| H 0.284504                  | 0.613715              | 0.869406     |
| S 2.440702                  | 1.565089              | 1.459658     |
| H 3.407360                  | -1.761942             | -0.431733    |
| H 3.598375                  | -0.839340             | 0.932480     |
| H 2.323316                  | 2.112751              | 0.231954     |
| C -1.637211                 | -1.456249             | 0.161313     |
| C -2.949607                 | -0.607937             | 0.139793     |
| O -1.153481                 | -1.666027             | 1.304208     |
| O -1.227091                 | -1.847093             | -0.945854    |
| H -3.777601                 | -1.308492             | 0.015897     |
| C -3.008129                 | 0.438032              | -0.968179    |
| N -3.095784                 | 0.010426              | 1.504364     |
| H -4.058331                 | 0.068212              | 1.834397     |
| H -3.993080                 | 0.905116              | -1.004720    |
| H -2.823093                 | -0.065768             | -1.914155    |
| S -1.806171                 | 1.821310              | -0.758752    |
| H -2.515581                 | -0.585874             | 2.123450     |
| H -2.680938                 | 0.950049              | 1.506125     |
| H -0.664407                 | 1.152890              | -1.092720    |
| 28                          |                       |              |
| Dimer 135 of the z...z type |                       |              |
| C -3.230873                 | 0.677137              | 0.333952     |
| C -3.041214                 | -0.595240             | -0.558764    |
| O -3.269963                 | 1.756709              | -0.304324    |
| O -3.370497                 | 0.478837              | 1.558068     |
| H -4.035440                 | -0.841381             | -0.943946    |
| C -2.512377                 | -1.832242             | 0.152424     |
| N -2.211498                 | -0.209105             | -1.748799    |
| H -2.103474                 | -0.976936             | -2.411435    |
| H -2.534565                 | -2.699367             | -0.510638    |
| H -3.173834                 | -2.024369             | 0.994743     |
| S -0.775318                 | -1.726625             | 0.754143     |
| H -2.674560                 | 0.573761              | -2.214865    |
| H -1.250066                 | 0.157951              | -1.481986    |
| H -0.882758                 | -0.510615             | 1.328885     |
| C 0.792459                  | 1.149616              | -0.289974    |
| C 2.331106                  | 0.931082              | -0.294363    |



| Nov 11, 22 15:56 dimers_structures.xyz Page 303/325 |           |           |           |
|-----------------------------------------------------|-----------|-----------|-----------|
| O                                                   | 0.287562  | 1.524456  | 0.784969  |
| O                                                   | 0.232095  | 0.852621  | -1.374606 |
| H                                                   | 2.773519  | 1.337644  | -1.201254 |
| C                                                   | 2.613983  | -0.566831 | -0.173762 |
| N                                                   | 2.917393  | 1.668042  | 0.879176  |
| H                                                   | 3.055938  | 2.657609  | 0.671097  |
| H                                                   | 2.132864  | -1.071418 | -1.008545 |
| H                                                   | 2.187111  | -0.962386 | 0.749527  |
| S                                                   | 4.402905  | -1.002479 | -0.109237 |
| H                                                   | 2.234432  | 1.614026  | 1.647740  |
| H                                                   | 3.819446  | 1.269906  | 1.161751  |
| H                                                   | 4.716658  | -0.553447 | -1.342155 |
| 28                                                  |           |           |           |
| Dimer 136 of the z...z type                         |           |           |           |
| C                                                   | 2.070672  | -1.205190 | 0.535712  |
| C                                                   | 2.620188  | 0.227284  | 0.838088  |
| O                                                   | 2.841669  | -1.959197 | -0.105658 |
| O                                                   | 0.932595  | -1.437173 | 0.989382  |
| H                                                   | 2.865852  | 0.260515  | 1.900854  |
| C                                                   | 1.631441  | 1.342345  | 0.522332  |
| N                                                   | 3.911890  | 0.382825  | 0.077422  |
| H                                                   | 4.629970  | 0.901120  | 0.581885  |
| H                                                   | 2.021436  | 2.312765  | 0.833096  |
| H                                                   | 0.700144  | 1.146743  | 1.049981  |
| S                                                   | 1.273003  | 1.522856  | -1.279736 |
| H                                                   | 4.217793  | -0.584079 | -0.131927 |
| H                                                   | 3.736739  | 0.844014  | -0.822730 |
| H                                                   | 0.728793  | 0.298423  | -1.451235 |
| C                                                   | -2.182766 | 0.397856  | 1.343269  |
| C                                                   | -2.926253 | 0.406221  | -0.035401 |
| O                                                   | -1.429153 | 1.386983  | 1.542972  |
| O                                                   | -2.457214 | -0.552437 | 2.094169  |
| H                                                   | -3.948820 | 0.730763  | 0.166623  |
| C                                                   | -2.968756 | -0.946425 | -0.736521 |
| N                                                   | -2.282369 | 1.471011  | -0.880561 |
| H                                                   | -2.941861 | 2.033202  | -1.416349 |
| H                                                   | -3.630516 | -0.915653 | -1.603157 |
| H                                                   | -3.354570 | -1.672999 | -0.024683 |
| S                                                   | -1.343940 | -1.522563 | -1.390730 |
| H                                                   | -1.754050 | 2.051548  | -0.199378 |
| H                                                   | -1.599071 | 1.055196  | -1.522506 |
| H                                                   | -0.646471 | -1.539553 | -0.223096 |
| 28                                                  |           |           |           |
| Dimer 137 of the z...z type                         |           |           |           |
| C                                                   | -2.053698 | 0.670475  | 1.178990  |
| C                                                   | -2.395492 | -0.800278 | 0.777038  |
| O                                                   | -3.033779 | 1.422535  | 1.378280  |
| O                                                   | -0.832758 | 0.921276  | 1.276068  |
| H                                                   | -2.274803 | -1.416095 | 1.670448  |
| C                                                   | -1.528168 | -1.364085 | -0.340385 |
| N                                                   | -3.856958 | -0.835816 | 0.412990  |
| H                                                   | -4.313012 | -1.722413 | 0.627357  |
| H                                                   | -1.811553 | -2.392973 | -0.568367 |
| H                                                   | -0.486248 | -1.367934 | -0.026168 |
| S                                                   | -1.703119 | -0.452551 | -1.935633 |
| H                                                   | -4.295746 | -0.055069 | 0.927218  |
| H                                                   | -3.970408 | -0.637550 | -0.587761 |
| H                                                   | -1.226855 | 0.729932  | -1.492712 |
| C                                                   | 2.578249  | -1.486054 | 0.290646  |
| C                                                   | 2.100404  | -0.008243 | 0.423960  |
| O                                                   | 3.808727  | -1.679650 | 0.454862  |
| O                                                   | 1.677645  | -2.297345 | -0.001318 |
| H                                                   | 1.212365  | 0.050983  | 1.048803  |
| C                                                   | 1.799679  | 0.559405  | -0.959644 |
| N                                                   | 3.199780  | 0.782280  | 1.086089  |
| H                                                   | 3.126298  | 0.748251  | 2.102842  |
| H                                                   | 1.074094  | -0.093626 | -1.439169 |
| H                                                   | 2.699524  | 0.576094  | -1.578401 |
| S                                                   | 1.167635  | 2.293770  | -0.931531 |

| Nov 11, 22 15:56 dimers_structures.xyz Page 304/325 |           |           |           |
|-----------------------------------------------------|-----------|-----------|-----------|
| H                                                   | 4.084175  | 0.317037  | 0.828450  |
| H                                                   | 3.193380  | 1.765724  | 0.799117  |
| H                                                   | 0.192252  | 2.051024  | -0.017357 |
| 28                                                  |           |           |           |
| Dimer 138 of the z...z type                         |           |           |           |
| C                                                   | 2.018568  | -1.755235 | 0.403981  |
| C                                                   | 1.976145  | -0.198783 | 0.267374  |
| O                                                   | 3.159412  | -2.251977 | 0.575077  |
| O                                                   | 0.913830  | -2.318559 | 0.287389  |
| H                                                   | 1.226918  | 0.224673  | 0.933467  |
| C                                                   | 1.660989  | 0.170976  | -1.178499 |
| N                                                   | 3.325798  | 0.332442  | 0.675313  |
| H                                                   | 3.344391  | 0.599671  | 1.659424  |
| H                                                   | 0.719834  | -0.306742 | -1.443633 |
| H                                                   | 2.427176  | -0.212653 | -1.855146 |
| S                                                   | 1.574438  | 1.991301  | -1.490254 |
| H                                                   | 3.974956  | -0.466546 | 0.557010  |
| H                                                   | 3.615644  | 1.143932  | 0.122512  |
| H                                                   | 0.805499  | 2.266482  | -0.406830 |
| C                                                   | -1.485182 | 1.227097  | 1.491926  |
| C                                                   | -2.357558 | 0.592035  | 0.366455  |
| O                                                   | -0.473329 | 1.871097  | 1.108200  |
| O                                                   | -1.864183 | 0.975718  | 2.647994  |
| H                                                   | -3.413731 | 0.745729  | 0.580241  |
| C                                                   | -2.042448 | -0.901833 | 0.278334  |
| N                                                   | -2.076339 | 1.274509  | -0.947841 |
| H                                                   | -2.538275 | 2.183276  | -0.999155 |
| H                                                   | -2.339652 | -1.358712 | 1.220323  |
| H                                                   | -0.974430 | -1.088673 | 0.146459  |
| S                                                   | -2.855923 | -1.775297 | -1.124882 |
| H                                                   | -1.069883 | 1.449649  | -1.045356 |
| H                                                   | -2.401510 | 0.697517  | -1.733333 |
| H                                                   | -4.128319 | -1.598096 | -0.712825 |
| 28                                                  |           |           |           |
| Dimer 139 of the z...z type                         |           |           |           |
| C                                                   | -1.714411 | 1.120772  | -0.948627 |
| C                                                   | -1.574666 | 0.444891  | 0.450808  |
| O                                                   | -2.111939 | 2.312593  | -0.933868 |
| O                                                   | -1.382670 | 0.410340  | -1.918291 |
| H                                                   | -0.519183 | 0.533357  | 0.716164  |
| C                                                   | -2.013806 | -1.009880 | 0.492341  |
| N                                                   | -2.338298 | 1.289449  | 1.434738  |
| H                                                   | -1.938938 | 1.286764  | 2.372642  |
| H                                                   | -1.872420 | -1.437747 | 1.485667  |
| H                                                   | -1.405124 | -1.570261 | -0.211267 |
| S                                                   | -3.797948 | -1.254031 | 0.084375  |
| H                                                   | -2.340627 | 2.240835  | 1.030190  |
| H                                                   | -3.314915 | 0.979811  | 1.486223  |
| H                                                   | -3.702826 | -0.802881 | -1.183750 |
| C                                                   | 2.534509  | 1.091682  | 0.466784  |
| C                                                   | 2.696197  | 0.141844  | -0.769127 |
| O                                                   | 3.607839  | 1.414099  | 1.031059  |
| O                                                   | 1.366950  | 1.436091  | 0.734140  |
| H                                                   | 2.713102  | 0.775180  | -1.658568 |
| C                                                   | 1.602902  | -0.905263 | -0.922257 |
| N                                                   | 4.060355  | -0.487980 | -0.656594 |
| H                                                   | 4.502487  | -0.680577 | -1.554998 |
| H                                                   | 1.803861  | -1.554892 | -1.776203 |
| H                                                   | 0.654767  | -0.403200 | -1.102934 |
| S                                                   | 1.459956  | -2.034297 | 0.529646  |
| H                                                   | 4.619887  | 0.181016  | -0.099101 |
| H                                                   | 4.002941  | -1.360863 | -0.121318 |
| H                                                   | 1.138567  | -1.074201 | 1.420650  |
| 28                                                  |           |           |           |
| Dimer 140 of the z...z type                         |           |           |           |
| C                                                   | 1.349234  | 1.408715  | 0.132048  |
| C                                                   | 2.845159  | 0.987516  | -0.025309 |
| O                                                   | 0.965058  | 1.615174  | 1.307909  |
| O                                                   | 0.717391  | 1.536036  | -0.936765 |

| Nov 11, 22 15:56 dimers_structures.xyz Page 305/325 |           |           |           |
|-----------------------------------------------------|-----------|-----------|-----------|
| H                                                   | 3.390420  | 1.880008  | -0.338178 |
| C                                                   | 3.090260  | -0.131825 | -1.034321 |
| N                                                   | 3.345794  | 0.619403  | 1.343562  |
| H                                                   | 4.319410  | 0.869444  | 1.511241  |
| H                                                   | 4.158348  | -0.253445 | -1.219685 |
| H                                                   | 2.601684  | 0.146938  | -1.965429 |
| S                                                   | 2.487386  | -1.783069 | -0.480339 |
| H                                                   | 2.709969  | 1.101844  | 2.002661  |
| H                                                   | 3.226835  | -0.393168 | 1.483711  |
| H                                                   | 1.139310  | -1.558289 | -0.605051 |
| C                                                   | -1.349095 | -1.408050 | 0.133637  |
| C                                                   | -2.845137 | -0.987136 | -0.023375 |
| O                                                   | -0.964287 | -1.613258 | 1.309508  |
| O                                                   | -0.717790 | -1.536423 | -0.935370 |
| H                                                   | -3.390477 | -1.879969 | -0.335117 |
| C                                                   | -3.090798 | 0.131205  | -1.033358 |
| N                                                   | -3.345109 | -0.617758 | 1.345406  |
| H                                                   | -4.318526 | -0.867993 | 1.513947  |
| H                                                   | -4.158981 | 0.252602  | -1.218321 |
| H                                                   | -2.602669 | -0.148462 | -1.964429 |
| S                                                   | -2.487713 | 1.782998  | -0.481280 |
| H                                                   | -2.708698 | -1.099310 | 2.004607  |
| H                                                   | -3.226429 | 0.394994  | 1.484465  |
| H                                                   | -1.139686 | 1.558030  | -0.606143 |
| 28                                                  |           |           |           |
| Dimer 141 of the z...z type                         |           |           |           |
| C                                                   | -1.820197 | 1.193195  | -0.689414 |
| C                                                   | -2.687810 | 0.726271  | 0.526179  |
| O                                                   | -2.400118 | 1.170174  | -1.803201 |
| O                                                   | -0.664785 | 1.560003  | -0.407318 |
| H                                                   | -2.979775 | 1.624021  | 1.073477  |
| C                                                   | -1.964359 | -0.223523 | 1.474338  |
| N                                                   | -3.943515 | 0.113645  | -0.031381 |
| H                                                   | -4.784156 | 0.329658  | 0.502653  |
| H                                                   | -2.564124 | -0.418401 | 2.364547  |
| H                                                   | -1.037238 | 0.256551  | 1.781396  |
| S                                                   | -1.619979 | -1.885202 | 0.751942  |
| H                                                   | -4.003330 | 0.477886  | -1.000573 |
| H                                                   | -3.835295 | -0.906314 | -0.091939 |
| H                                                   | -0.832768 | -1.494269 | -0.284937 |
| C                                                   | 1.773907  | -1.560406 | -0.838611 |
| C                                                   | 1.794321  | -0.347982 | 0.138993  |
| O                                                   | 2.774357  | -2.313666 | -0.785514 |
| O                                                   | 0.777704  | -1.617944 | -1.591227 |
| H                                                   | 0.804120  | -0.142256 | 0.531055  |
| C                                                   | 2.314144  | 0.889181  | -0.587302 |
| N                                                   | 2.694174  | -0.692595 | 1.296078  |
| H                                                   | 2.216660  | -1.286304 | 1.975060  |
| H                                                   | 1.631022  | 1.097744  | -1.406598 |
| H                                                   | 3.318173  | 0.718654  | -0.981095 |
| S                                                   | 2.423676  | 2.381765  | 0.489953  |
| H                                                   | 3.484787  | -1.233410 | 0.919901  |
| H                                                   | 3.021391  | 0.151929  | 1.778022  |
| H                                                   | 1.089457  | 2.483202  | 0.668813  |
| 28                                                  |           |           |           |
| Dimer 142 of the z...z type                         |           |           |           |
| C                                                   | 1.230973  | 1.496156  | 0.079550  |
| C                                                   | 2.595125  | 0.983587  | -0.473483 |
| O                                                   | 1.208126  | 1.833421  | 1.287276  |
| O                                                   | 0.323019  | 1.552299  | -0.775560 |
| H                                                   | 2.919031  | 1.703822  | -1.224846 |
| C                                                   | 2.519761  | -0.410874 | -1.115367 |
| N                                                   | 3.586415  | 1.029744  | 0.656946  |
| H                                                   | 4.494651  | 1.413041  | 0.400446  |
| H                                                   | 3.358291  | -0.562345 | -1.795158 |
| H                                                   | 1.581621  | -0.478126 | -1.665583 |
| S                                                   | 2.584911  | -1.805012 | 0.087358  |
| H                                                   | 3.129011  | 1.596137  | 1.393336  |
| H                                                   | 3.705164  | 0.075760  | 1.032554  |

| Nov 11, 22 15:56 dimers_structures.xyz Page 306/325 |           |           |           |
|-----------------------------------------------------|-----------|-----------|-----------|
| H                                                   | 1.290733  | -1.667869 | 0.534915  |
| C                                                   | -1.112588 | -1.331653 | -0.154608 |
| C                                                   | -2.650569 | -1.126224 | 0.020736  |
| O                                                   | -0.460735 | -1.402878 | 0.928143  |
| O                                                   | -0.708931 | -1.449780 | -1.318370 |
| H                                                   | -3.126391 | -2.068105 | -0.256757 |
| C                                                   | -3.226981 | 0.002565  | -0.833831 |
| N                                                   | -2.919679 | -0.900585 | 1.484035  |
| H                                                   | -3.765615 | -1.354129 | 1.826249  |
| H                                                   | -4.316533 | -0.043972 | -0.849624 |
| H                                                   | -2.854776 | -0.127651 | -1.848078 |
| S                                                   | -2.810720 | 1.689529  | -0.215155 |
| H                                                   | -2.077055 | -1.249242 | 1.972944  |
| H                                                   | -2.980360 | 0.113157  | 1.658836  |
| H                                                   | -1.445855 | 1.617516  | -0.388640 |
| 28                                                  |           |           |           |
| Dimer 143 of the z...z type                         |           |           |           |
| C                                                   | -1.927777 | -0.707858 | -1.193308 |
| C                                                   | -2.763098 | -0.459158 | 0.108261  |
| O                                                   | -1.242013 | -1.764204 | -1.186430 |
| O                                                   | -2.065553 | 0.139099  | -2.090170 |
| H                                                   | -3.763854 | -0.854358 | -0.079270 |
| C                                                   | -2.874972 | 1.000437  | 0.523026  |
| N                                                   | -2.166863 | -1.303107 | 1.201795  |
| H                                                   | -2.828853 | -1.550712 | 1.937676  |
| H                                                   | -3.528817 | 1.114415  | 1.388656  |
| H                                                   | -3.297982 | 1.553050  | -0.312546 |
| S                                                   | -1.271005 | 1.769386  | 1.004308  |
| H                                                   | -1.798160 | -2.147863 | 0.740971  |
| H                                                   | -1.368286 | -0.812643 | 1.624786  |
| H                                                   | -0.647765 | 1.653015  | -0.192319 |
| C                                                   | 1.927417  | 0.707500  | -1.193636 |
| C                                                   | 2.763069  | 0.459320  | 0.107824  |
| O                                                   | 1.241443  | 1.763715  | -1.186974 |
| O                                                   | 2.065161  | -0.139712 | -2.090245 |
| H                                                   | 3.763721  | 0.854593  | -0.080106 |
| C                                                   | 2.875222  | -1.000157 | 0.522950  |
| N                                                   | 2.167070  | 1.303452  | 1.201332  |
| H                                                   | 2.829113  | 1.550752  | 1.937279  |
| H                                                   | 3.529206  | -1.113867 | 1.388512  |
| H                                                   | 3.298140  | -1.552958 | -0.312542 |
| S                                                   | 1.271363  | -1.769152 | 1.004672  |
| H                                                   | 1.798596  | 2.148387  | 0.740743  |
| H                                                   | 1.368333  | 0.813187  | 1.624287  |
| H                                                   | 0.647969  | -1.652856 | -0.191835 |
| 28                                                  |           |           |           |
| Dimer 144 of the z...z type                         |           |           |           |
| C                                                   | 1.241245  | 1.973967  | 0.658558  |
| C                                                   | 1.681383  | 0.761139  | -0.217292 |
| O                                                   | 2.003879  | 2.970635  | 0.622489  |
| O                                                   | 0.203954  | 1.794201  | 1.328177  |
| H                                                   | 0.838756  | 0.331758  | -0.752241 |
| C                                                   | 2.332824  | -0.301473 | 0.667326  |
| N                                                   | 2.666588  | 1.256583  | -1.243767 |
| H                                                   | 2.194972  | 1.657127  | -2.054766 |
| H                                                   | 1.582751  | -0.648448 | 1.374207  |
| H                                                   | 3.180203  | 0.119123  | 1.212293  |
| S                                                   | 2.975903  | -1.751274 | -0.273410 |
| H                                                   | 3.204097  | 2.014856  | -0.799901 |
| H                                                   | 3.279334  | 0.498519  | -1.565442 |
| H                                                   | 1.743385  | -2.125061 | -0.721137 |
| C                                                   | -0.801096 | -1.744851 | -0.013871 |
| C                                                   | -2.201559 | -1.071156 | -0.151027 |
| O                                                   | -0.410173 | -1.967136 | 1.153932  |
| O                                                   | -0.204452 | -1.932555 | -1.097006 |
| H                                                   | -2.814457 | -1.616953 | -0.865668 |
| C                                                   | -2.020701 | 0.383736  | -0.583235 |
| N                                                   | -2.877962 | -1.140796 | 1.192379  |
| H                                                   | -3.395639 | -2.011794 | 1.310311  |

| Nov 11, 22 15:56            |           |           | dimers_structures.xyz | Page 307/325 |
|-----------------------------|-----------|-----------|-----------------------|--------------|
| H                           | -1.526715 | 0.385894  | -1.552957             |              |
| H                           | -1.387996 | 0.917408  | 0.131389              |              |
| S                           | -3.583603 | 1.353056  | -0.675442             |              |
| H                           | -2.124133 | -1.138554 | 1.897001              |              |
| H                           | -3.528189 | -0.360818 | 1.333398              |              |
| H                           | -4.181804 | 0.608582  | -1.628626             |              |
| 28                          |           |           |                       |              |
| Dimer 145 of the z...z type |           |           |                       |              |
| C                           | 0.687963  | 1.833525  | -0.088389             |              |
| C                           | 1.623990  | 0.611754  | -0.306266             |              |
| O                           | -0.009653 | 2.133746  | -1.098213             |              |
| O                           | 0.643922  | 2.311209  | 1.057094              |              |
| H                           | 1.005197  | -0.270520 | -0.117909             |              |
| C                           | 2.847825  | 0.533454  | 0.583912              |              |
| N                           | 1.987177  | 0.548085  | -1.767820             |              |
| H                           | 1.154871  | 0.850144  | -2.291903             |              |
| H                           | 2.523909  | 0.678192  | 1.611769              |              |
| H                           | 3.580060  | 1.307924  | 0.346631              |              |
| S                           | 3.729148  | -1.085260 | 0.421130              |              |
| H                           | 2.744719  | 1.193676  | -2.000307             |              |
| H                           | 2.275783  | -0.389874 | -2.052198             |              |
| H                           | 2.648762  | -1.849085 | 0.694967              |              |
| C                           | -1.036346 | -2.118057 | 0.104577              |              |
| C                           | -1.721866 | -0.779284 | -0.323478             |              |
| O                           | -1.781608 | -3.123821 | 0.125113              |              |
| O                           | 0.168743  | -2.017271 | 0.421548              |              |
| H                           | -1.110031 | -0.225029 | -1.032546             |              |
| C                           | -1.990074 | 0.079662  | 0.914062              |              |
| N                           | -3.016706 | -1.115433 | -1.012063             |              |
| H                           | -2.872535 | -1.334645 | -1.997992             |              |
| H                           | -1.036281 | 0.317621  | 1.381407              |              |
| H                           | -2.600181 | -0.470087 | 1.633593              |              |
| S                           | -2.901981 | 1.640488  | 0.556439              |              |
| H                           | -3.385426 | -1.966260 | -0.563623             |              |
| H                           | -3.683823 | -0.337631 | -0.948012             |              |
| H                           | -1.913171 | 2.186142  | -0.196637             |              |
| 28                          |           |           |                       |              |
| Dimer 146 of the z...z type |           |           |                       |              |
| C                           | 2.259487  | -0.774060 | 1.090506              |              |
| C                           | 2.875317  | 0.477481  | 0.377923              |              |
| O                           | 2.835435  | -1.864381 | 0.845837              |              |
| O                           | 1.295095  | -0.535945 | 1.839090              |              |
| H                           | 3.446356  | 1.022859  | 1.131206              |              |
| C                           | 1.839398  | 1.412159  | -0.234977             |              |
| N                           | 3.856029  | -0.030544 | -0.644128             |              |
| H                           | 4.710884  | 0.520195  | -0.711682             |              |
| H                           | 2.305177  | 2.328661  | -0.599670             |              |
| H                           | 1.128172  | 1.674771  | 0.545125              |              |
| S                           | 0.962685  | 0.706139  | -1.695096             |              |
| H                           | 4.052996  | -1.005467 | -0.346401             |              |
| H                           | 3.409128  | -0.073194 | -1.567879             |              |
| H                           | 0.428866  | -0.403656 | -1.107187             |              |
| C                           | -1.939962 | -1.694645 | -0.345130             |              |
| C                           | -2.280787 | -0.173167 | -0.372792             |              |
| O                           | -2.851950 | -2.453035 | 0.055584              |              |
| O                           | -0.772189 | -1.968671 | -0.696315             |              |
| H                           | -1.934503 | 0.265221  | -1.305445             |              |
| C                           | -1.640115 | 0.519515  | 0.824581              |              |
| N                           | -3.778539 | -0.014230 | -0.325046             |              |
| H                           | -4.198902 | -0.136400 | -1.247282             |              |
| H                           | -0.601078 | 0.208601  | 0.911462              |              |
| H                           | -2.141645 | 0.224088  | 1.749076              |              |
| S                           | -1.751013 | 2.358516  | 0.759548              |              |
| H                           | -4.143704 | -0.768200 | 0.273348              |              |
| H                           | -4.057293 | 0.904823  | 0.030496              |              |
| H                           | -1.064791 | 2.489197  | -0.396407             |              |
| 28                          |           |           |                       |              |
| Dimer 147 of the z...z type |           |           |                       |              |
| C                           | -1.632765 | -1.357942 | -0.597534             |              |

| Nov 11, 22 15:56            |           |           | dimers_structures.xyz | Page 308/325 |
|-----------------------------|-----------|-----------|-----------------------|--------------|
| C                           | -3.045317 | -0.977172 | -0.037351             |              |
| O                           | -0.893854 | -1.977415 | 0.209830              |              |
| O                           | -1.405663 | -1.014148 | -1.770730             |              |
| H                           | -3.738609 | -1.757230 | -0.359300             |              |
| C                           | -3.566944 | 0.376764  | -0.498434             |              |
| N                           | -2.960092 | -1.065941 | 1.463396              |              |
| H                           | -3.823829 | -1.372310 | 1.910526              |              |
| H                           | -4.551369 | 0.582165  | -0.075785             |              |
| H                           | -3.648528 | 0.357979  | -1.582473             |              |
| S                           | -2.495043 | 1.794565  | -0.000126             |              |
| H                           | -2.185325 | -1.729744 | 1.644492              |              |
| H                           | -2.686503 | -0.160617 | 1.859109              |              |
| H                           | -1.474030 | 1.481503  | -0.820108             |              |
| C                           | 3.194735  | -0.612346 | -0.588992             |              |
| C                           | 1.983121  | -0.603308 | 0.397248              |              |
| O                           | 4.304498  | -0.891951 | -0.065420             |              |
| O                           | 2.924716  | -0.364046 | -1.778967             |              |
| H                           | 1.480106  | -1.570207 | 0.331065              |              |
| C                           | 0.947165  | 0.470422  | 0.120215              |              |
| N                           | 2.546613  | -0.486860 | 1.789410              |              |
| H                           | 1.988782  | -0.960265 | 2.499396              |              |
| H                           | 0.138439  | 0.416813  | 0.846653              |              |
| H                           | 0.533148  | 0.283046  | -0.866549             |              |
| S                           | 1.592346  | 2.193400  | 0.209409              |              |
| H                           | 3.498466  | -0.887450 | 1.728571              |              |
| H                           | 2.645440  | 0.500239  | 2.049001              |              |
| H                           | 2.439180  | 2.069937  | -0.833666             |              |
| 28                          |           |           |                       |              |
| Dimer 148 of the z...z type |           |           |                       |              |
| C                           | -2.178932 | 1.367349  | 0.383334              |              |
| C                           | -3.067688 | 0.180804  | 0.888907              |              |
| O                           | -2.730775 | 2.131212  | -0.446353             |              |
| O                           | -1.040936 | 1.428280  | 0.884215              |              |
| H                           | -3.451383 | 0.463568  | 1.871004              |              |
| C                           | -2.321792 | -1.141943 | 1.004852              |              |
| N                           | -4.251055 | 0.081425  | -0.035162             |              |
| H                           | -5.115820 | -0.195470 | 0.428313              |              |
| H                           | -2.955678 | -1.916896 | 1.437849              |              |
| H                           | -1.467485 | -0.984594 | 1.659411              |              |
| S                           | -1.766078 | -1.820309 | -0.618005             |              |
| H                           | -4.334127 | 1.020955  | -0.463209             |              |
| H                           | -4.050579 | -0.582787 | -0.792062             |              |
| H                           | -0.985906 | -0.781437 | -0.999668             |              |
| C                           | 1.494646  | 0.533544  | -1.071805             |              |
| C                           | 1.606063  | -0.167898 | 0.321939              |              |
| O                           | 0.907345  | -0.154887 | -1.948978             |              |
| O                           | 1.956234  | 1.684490  | -1.156063             |              |
| H                           | 0.653939  | 0.027632  | 0.820481              |              |
| C                           | 2.748999  | 0.311213  | 1.201618              |              |
| N                           | 1.689478  | -1.652938 | 0.075832              |              |
| H                           | 1.326687  | -2.215410 | 0.845716              |              |
| H                           | 2.739453  | -0.191496 | 2.169932              |              |
| H                           | 2.627778  | 1.379994  | 1.360513              |              |
| S                           | 4.419252  | -0.008912 | 0.482440              |              |
| H                           | 1.149388  | -1.839827 | -0.780634             |              |
| H                           | 2.664598  | -1.921994 | -0.099440             |              |
| H                           | 4.241026  | 0.786264  | -0.592739             |              |
| 28                          |           |           |                       |              |
| Dimer 149 of the z...z type |           |           |                       |              |
| C                           | 1.896816  | 0.826594  | 1.133758              |              |
| C                           | 2.207978  | 0.790221  | -0.396406             |              |
| O                           | 2.875457  | 1.048185  | 1.884540              |              |
| O                           | 0.696576  | 0.661412  | 1.437018              |              |
| H                           | 1.826317  | 1.718327  | -0.827290             |              |
| C                           | 1.599152  | -0.390253 | -1.144834             |              |
| N                           | 3.707065  | 0.817073  | -0.543578             |              |
| H                           | 4.030694  | 1.289244  | -1.387586             |              |
| H                           | 1.824017  | -0.327513 | -2.210413             |              |
| H                           | 0.522979  | -0.385351 | -1.006150             |              |

| Nov 11, 22 15:56 dimers_structures.xyz Page 309/325 |           |           |           |
|-----------------------------------------------------|-----------|-----------|-----------|
| S                                                   | 2.204330  | -2.030624 | -0.561547 |
| H                                                   | 4.065186  | 1.276890  | 0.309056  |
| H                                                   | 4.076490  | -0.139570 | -0.532389 |
| H                                                   | 1.327119  | -2.115142 | 0.459649  |
| C                                                   | -2.044385 | -1.243539 | 0.495735  |
| C                                                   | -2.973268 | -0.406046 | -0.449761 |
| O                                                   | -2.390905 | -1.256634 | 1.704828  |
| O                                                   | -1.105107 | -1.832449 | -0.065970 |
| H                                                   | -3.589112 | -1.122190 | -0.996452 |
| C                                                   | -2.230030 | 0.476180  | -1.448065 |
| N                                                   | -3.893459 | 0.394671  | 0.430519  |
| H                                                   | -4.852227 | 0.452495  | 0.090532  |
| H                                                   | -2.918112 | 0.898298  | -2.181926 |
| H                                                   | -1.509317 | -0.149989 | -1.970353 |
| S                                                   | -1.386916 | 1.926281  | -0.681545 |
| H                                                   | -3.842539 | -0.083065 | 1.351182  |
| H                                                   | -3.516682 | 1.344307  | 0.547709  |
| H                                                   | -0.579895 | 1.245165  | 0.191152  |
| 28                                                  |           |           |           |
| Dimer 150 of the z...z type                         |           |           |           |
| C                                                   | 2.289261  | 1.566833  | -0.450178 |
| C                                                   | 1.978796  | 0.059452  | -0.198093 |
| O                                                   | 3.497050  | 1.853031  | -0.635717 |
| O                                                   | 1.291004  | 2.313615  | -0.401841 |
| H                                                   | 1.148495  | -0.251784 | -0.826872 |
| C                                                   | 1.672396  | -0.163935 | 1.279517  |
| N                                                   | 3.178972  | -0.753281 | -0.607772 |
| H                                                   | 3.162920  | -0.962532 | -1.606286 |
| H                                                   | 0.875601  | 0.516583  | 1.568381  |
| H                                                   | 2.545716  | 0.071863  | 1.891942  |
| S                                                   | 1.228035  | -1.902047 | 1.710141  |
| H                                                   | 4.009932  | -0.169478 | -0.433172 |
| H                                                   | 3.229992  | -1.640569 | -0.097177 |
| H                                                   | 0.218397  | -2.051873 | 0.815261  |
| C                                                   | -1.257219 | -1.222319 | -1.277855 |
| C                                                   | -2.287504 | -0.154085 | -0.804359 |
| O                                                   | -1.273930 | -2.297905 | -0.623564 |
| O                                                   | -0.481033 | -0.860988 | -2.179672 |
| H                                                   | -2.652201 | 0.440452  | -1.638473 |
| C                                                   | -1.607810 | 0.722372  | 0.245918  |
| N                                                   | -3.460496 | -0.873233 | -0.191733 |
| H                                                   | -4.110353 | -1.210001 | -0.903142 |
| H                                                   | -0.731557 | 1.202480  | -0.191069 |
| H                                                   | -1.282254 | 0.103202  | 1.084943  |
| S                                                   | -2.696081 | 2.006525  | 0.994066  |
| H                                                   | -3.083516 | -1.697384 | 0.298532  |
| H                                                   | -3.977318 | -0.269979 | 0.457073  |
| H                                                   | -2.886702 | 2.721024  | -0.134047 |
| 28                                                  |           |           |           |
| Dimer 151 of the z...z type                         |           |           |           |
| C                                                   | -1.276740 | 1.408517  | -0.442374 |
| C                                                   | -1.662812 | 0.396471  | 0.684123  |
| O                                                   | -1.511166 | 2.614002  | -0.176876 |
| O                                                   | -0.749059 | 0.913479  | -1.457546 |
| H                                                   | -0.772606 | 0.220638  | 1.290319  |
| C                                                   | -2.172739 | -0.948518 | 0.193202  |
| N                                                   | -2.668573 | 1.084189  | 1.569405  |
| H                                                   | -2.646730 | 0.766527  | 2.538026  |
| H                                                   | -2.427899 | -1.595570 | 1.033337  |
| H                                                   | -1.381144 | -1.428209 | -0.375177 |
| S                                                   | -3.700276 | -0.823069 | -0.836198 |
| H                                                   | -2.453455 | 2.092149  | 1.502222  |
| H                                                   | -3.614562 | 0.947554  | 1.196620  |
| H                                                   | -3.122670 | -0.121799 | -1.833771 |
| C                                                   | 1.183188  | -1.742844 | 0.590485  |
| C                                                   | 2.464631  | -0.881483 | 0.342702  |
| O                                                   | 0.802093  | -2.437006 | -0.383553 |
| O                                                   | 0.661557  | -1.595877 | 1.712083  |
| H                                                   | 3.181825  | -1.030292 | 1.147806  |

| Nov 11, 22 15:56 dimers_structures.xyz Page 310/325 |           |           |           |
|-----------------------------------------------------|-----------|-----------|-----------|
| C                                                   | 2.069417  | 0.589143  | 0.230358  |
| N                                                   | 3.095555  | -1.355372 | -0.940321 |
| H                                                   | 3.746270  | -2.124519 | -0.780376 |
| H                                                   | 1.598773  | 0.883831  | 1.166021  |
| H                                                   | 1.346188  | 0.727427  | -0.575271 |
| S                                                   | 3.461995  | 1.731535  | -0.155700 |
| H                                                   | 2.322188  | -1.729064 | -1.513892 |
| H                                                   | 3.599433  | -0.604794 | -1.423020 |
| H                                                   | 4.190932  | 1.474452  | 0.950085  |
| 28                                                  |           |           |           |
| Dimer 152 of the z...z type                         |           |           |           |
| C                                                   | 1.462349  | -1.330986 | 1.412270  |
| C                                                   | 2.356512  | -0.658734 | 0.326060  |
| O                                                   | 0.452158  | -1.950581 | 0.984964  |
| O                                                   | 1.823841  | -1.131510 | 2.583566  |
| H                                                   | 3.407746  | -0.837674 | 0.544180  |
| C                                                   | 2.062694  | 0.841626  | 0.296331  |
| N                                                   | 2.073120  | -1.282498 | -1.016769 |
| H                                                   | 2.560657  | -2.172544 | -1.123940 |
| H                                                   | 2.331330  | 1.251116  | 1.268256  |
| H                                                   | 1.003450  | 1.052248  | 0.128757  |
| S                                                   | 2.937730  | 1.763861  | -1.036685 |
| H                                                   | 1.069098  | -1.483903 | -1.089422 |
| H                                                   | 2.363288  | -0.658716 | -1.779445 |
| H                                                   | 4.193486  | 1.526056  | -0.603938 |
| C                                                   | -1.913907 | 1.829232  | 0.377680  |
| C                                                   | -1.927689 | 0.270337  | 0.276821  |
| O                                                   | -3.020664 | 2.365400  | 0.631590  |
| O                                                   | -0.807186 | 2.355433  | 0.152937  |
| H                                                   | -1.131028 | -0.163478 | 0.877031  |
| C                                                   | -1.770336 | -0.145293 | -1.183300 |
| N                                                   | -3.242756 | -0.215396 | 0.827669  |
| H                                                   | -3.179589 | -0.425589 | 1.823743  |
| H                                                   | -0.837789 | 0.277682  | -1.551689 |
| H                                                   | -2.582072 | 0.259017  | -1.791869 |
| S                                                   | -1.801756 | -1.973107 | -1.452964 |
| H                                                   | -3.896971 | 0.578754  | 0.720094  |
| H                                                   | -3.579481 | -1.055107 | 0.347173  |
| H                                                   | -0.913195 | -2.261699 | -0.470480 |
| 28                                                  |           |           |           |
| Dimer 153 of the z...z type                         |           |           |           |
| C                                                   | -1.217929 | -1.201124 | 0.126869  |
| C                                                   | -2.761980 | -1.255039 | 0.381665  |
| O                                                   | -0.517297 | -1.000394 | 1.155022  |
| O                                                   | -0.859669 | -1.368309 | -1.049975 |
| H                                                   | -3.043027 | -2.308264 | 0.442502  |
| C                                                   | -3.591918 | -0.573624 | -0.698767 |
| N                                                   | -3.005444 | -0.656279 | 1.740736  |
| H                                                   | -3.786963 | -1.074574 | 2.244322  |
| H                                                   | -4.659279 | -0.678404 | -0.500228 |
| H                                                   | -3.360437 | -1.048379 | -1.649339 |
| S                                                   | -3.281912 | 1.240308  | -0.825079 |
| H                                                   | -2.114481 | -0.783225 | 2.252169  |
| H                                                   | -3.165596 | 0.354087  | 1.655157  |
| H                                                   | -1.975157 | 1.144798  | -1.149162 |
| C                                                   | 3.456803  | -0.899310 | -0.379081 |
| C                                                   | 2.454348  | 0.042938  | 0.359987  |
| O                                                   | 4.639730  | -0.474237 | -0.448172 |
| O                                                   | 2.963911  | -1.940209 | -0.851758 |
| H                                                   | 1.799810  | -0.517073 | 1.023990  |
| C                                                   | 1.606732  | 0.786571  | -0.669552 |
| N                                                   | 3.266357  | 1.012333  | 1.180309  |
| H                                                   | 3.483159  | 0.635399  | 2.102777  |
| H                                                   | 0.996830  | 0.049064  | -1.187054 |
| H                                                   | 2.237109  | 1.313556  | -1.388745 |
| S                                                   | 0.501562  | 2.074047  | 0.057103  |
| H                                                   | 4.160280  | 1.127260  | 0.675593  |
| H                                                   | 2.779349  | 1.906565  | 1.302753  |
| H                                                   | -0.182128 | 1.219861  | 0.847897  |

| Nov 11, 22 15:56            | dimers_structures.xyz         | Page 311/325 |
|-----------------------------|-------------------------------|--------------|
| 28                          |                               |              |
| Dimer 154 of the z...z type |                               |              |
| C                           | -1.204440 -0.065443 0.281099  |              |
| C                           | -2.400847 -0.980825 0.694972  |              |
| O                           | -0.769078 0.685363 1.197451   |              |
| O                           | -0.795145 -0.190630 -0.882916 |              |
| H                           | -1.980561 -1.943158 0.994917  |              |
| C                           | -3.426640 -1.200206 -0.408540 |              |
| N                           | -3.026173 -0.377432 1.924334  |              |
| H                           | -3.469203 -1.062128 2.537102  |              |
| H                           | -4.233537 -1.852359 -0.071908 |              |
| H                           | -2.922983 -1.669229 -1.250355 |              |
| S                           | -4.234923 0.358819 -0.973455  |              |
| H                           | -2.266482 0.121416 2.413653   |              |
| H                           | -3.724536 0.323701 1.651379   |              |
| H                           | -3.109147 0.913540 -1.468986  |              |
| C                           | 3.126856 -1.455508 -0.327847  |              |
| C                           | 2.397694 -0.187236 0.216751   |              |
| O                           | 4.353806 -1.525991 -0.054707  |              |
| O                           | 2.424798 -2.228966 -1.005568  |              |
| H                           | 1.434217 -0.437192 0.651913   |              |
| C                           | 2.201383 0.819870 -0.917401   |              |
| N                           | 3.261920 0.404445 1.299916    |              |
| H                           | 3.048383 0.007910 2.214639    |              |
| H                           | 1.492516 0.382652 -1.615342   |              |
| H                           | 3.146102 1.023268 -1.425885   |              |
| S                           | 1.560541 2.454262 -0.349055   |              |
| H                           | 4.231374 0.138605 1.062146    |              |
| H                           | 3.144441 1.423553 1.350161    |              |
| H                           | 0.470208 1.928914 0.278691    |              |
| 28                          |                               |              |
| Dimer 155 of the z...z type |                               |              |
| C                           | 3.655915 -0.954043 -0.178932  |              |
| C                           | 2.631634 0.093930 0.379159    |              |
| O                           | 4.849680 -0.555571 -0.222802  |              |
| O                           | 3.169700 -2.036382 -0.546961  |              |
| H                           | 1.974701 -0.359072 1.120228   |              |
| C                           | 1.799295 0.647169 -0.772994   |              |
| N                           | 3.441876 1.181727 1.038083    |              |
| H                           | 3.534050 1.030630 2.042217    |              |
| H                           | 1.219087 -0.177193 -1.181064  |              |
| H                           | 2.435647 1.063848 -1.556083   |              |
| S                           | 0.666824 2.028852 -0.281501   |              |
| H                           | 4.385755 1.087468 0.613119    |              |
| H                           | 3.048880 2.115571 0.892175    |              |
| H                           | 0.199518 1.432284 0.836800    |              |
| C                           | -0.945349 -0.899115 0.407926  |              |
| C                           | -2.200880 -0.008294 0.133292  |              |
| O                           | -0.618243 -1.640936 -0.547361 |              |
| O                           | -0.425245 -0.776610 1.535259  |              |
| H                           | -2.160320 0.913236 0.709731   |              |
| C                           | -3.465927 -0.797320 0.457443  |              |
| N                           | -2.175806 0.366395 -1.322462  |              |
| H                           | -1.465965 1.091207 -1.484090  |              |
| H                           | -3.441852 -1.073964 1.510407  |              |
| H                           | -3.501542 -1.711906 -0.137399 |              |
| S                           | -5.036029 0.096287 0.084411   |              |
| H                           | -1.892423 -0.469604 -1.850440 |              |
| H                           | -3.087350 0.705947 -1.645865  |              |
| H                           | -4.858654 1.094508 0.973922   |              |
| 28                          |                               |              |
| Dimer 156 of the z...z type |                               |              |
| C                           | -3.594891 -0.337852 -0.847114 |              |
| C                           | -2.188812 -0.079392 -0.202496 |              |
| O                           | -4.360117 0.661240 -0.872002  |              |
| O                           | -3.794031 -1.502325 -1.230892 |              |
| H                           | -1.415657 -0.407275 -0.893367 |              |
| C                           | -2.079580 -0.820282 1.127272  |              |
| N                           | -2.067725 1.410387 -0.006232  |              |

| Nov 11, 22 15:56            | dimers_structures.xyz         | Page 312/325 |
|-----------------------------|-------------------------------|--------------|
| H                           | -1.452713 1.858377 -0.687309  |              |
| H                           | -2.237563 -1.879558 0.935880  |              |
| H                           | -2.858434 -0.479513 1.813114  |              |
| S                           | -0.481955 -0.580953 2.019681  |              |
| H                           | -3.043771 1.748344 -0.155999  |              |
| H                           | -1.722585 1.667341 0.920422   |              |
| O                           | 0.298623 -1.304530 1.165315   |              |
| C                           | 2.593824 -1.497069 -0.432562  |              |
| C                           | 2.578849 -0.016956 0.065928   |              |
| O                           | 3.569675 -1.828716 -1.138483  |              |
| O                           | 1.591553 -2.162110 -0.087980  |              |
| H                           | 2.374654 0.008108 1.134303    |              |
| C                           | 1.521554 0.765443 -0.704384   |              |
| N                           | 3.942060 0.584117 -0.148765   |              |
| H                           | 4.578144 0.345292 0.613188    |              |
| H                           | 0.602211 0.190490 -0.669870   |              |
| H                           | 1.804119 0.880724 -1.752226   |              |
| S                           | 1.219548 2.465268 -0.063037   |              |
| H                           | 4.332767 0.161502 -1.002696   |              |
| H                           | 3.911803 1.604833 -0.225501   |              |
| H                           | 0.864269 2.067227 1.178400    |              |
| 28                          |                               |              |
| Dimer 157 of the z...z type |                               |              |
| C                           | 1.652040 -1.236903 0.215878   |              |
| C                           | 3.150833 -0.900694 0.508138   |              |
| O                           | 1.425749 -1.793877 -0.883736  |              |
| O                           | 0.855139 -0.921053 1.123432   |              |
| H                           | 3.508210 -1.617269 1.249512   |              |
| C                           | 3.366484 0.514761 1.034259    |              |
| N                           | 3.919474 -1.150520 -0.761431  |              |
| H                           | 4.845782 -1.549452 -0.614500  |              |
| H                           | 4.408187 0.674189 1.315776    |              |
| H                           | 2.738892 0.643775 1.913114    |              |
| S                           | 2.985001 1.832372 -0.199745   |              |
| H                           | 3.317772 -1.784063 -1.317744  |              |
| H                           | 4.010493 -0.277237 -1.294081  |              |
| H                           | 1.661004 1.580906 -0.303168   |              |
| C                           | -3.088479 -1.151034 0.026657  |              |
| C                           | -3.426139 0.238999 -0.610058  |              |
| O                           | -3.598906 -1.358750 1.158450  |              |
| O                           | -2.384303 -1.897688 -0.673896 |              |
| H                           | -4.157867 0.060009 -1.399597  |              |
| C                           | -2.218226 0.961825 -1.199115  |              |
| N                           | -4.108304 1.059641 0.451287   |              |
| H                           | -4.875190 1.634695 0.105532   |              |
| H                           | -2.525821 1.855496 -1.743586  |              |
| H                           | -1.723744 0.280627 -1.888085  |              |
| S                           | -1.014803 1.542718 0.071116   |              |
| H                           | -4.433544 0.361272 1.146348   |              |
| H                           | -3.421344 1.659702 0.923543   |              |
| H                           | -0.543231 0.326837 0.460075   |              |
| 28                          |                               |              |
| Dimer 158 of the z...z type |                               |              |
| C                           | -3.619665 0.392675 0.771487   |              |
| C                           | -2.177343 0.118125 0.226891   |              |
| O                           | -4.343543 -0.627468 0.892858  |              |
| O                           | -3.886725 1.590374 0.973017   |              |
| H                           | -1.444598 0.689788 0.792865   |              |
| C                           | -2.125319 0.484459 -1.254636  |              |
| N                           | -1.895710 -1.349650 0.418702  |              |
| H                           | -1.513750 -1.549383 1.343696  |              |
| H                           | -2.393760 1.535018 -1.348160  |              |
| H                           | -2.852932 -0.105188 -1.815839 |              |
| S                           | -0.497123 0.188608 -2.069246  |              |
| H                           | -2.820833 -1.811333 0.368771  |              |
| H                           | -1.246794 -1.730827 -0.276673 |              |
| H                           | 0.208737 1.089726 -1.324406   |              |
| C                           | 2.382376 1.634347 0.331050    |              |
| C                           | 2.556353 0.135084 -0.072253   |              |

| Nov 11, 22 15:56 dimers_structures.xyz Page 313/325 |           |           |           |
|-----------------------------------------------------|-----------|-----------|-----------|
| O                                                   | 3.293392  | 2.124209  | 1.030804  |
| O                                                   | 1.315867  | 2.150739  | -0.071849 |
| H                                                   | 2.376571  | 0.017770  | -1.138512 |
| C                                                   | 1.588853  | -0.721609 | 0.736265  |
| N                                                   | 3.977896  | -0.281153 | 0.191872  |
| H                                                   | 4.594641  | -0.003655 | -0.573035 |
| H                                                   | 0.611276  | -0.255532 | 0.666136  |
| H                                                   | 1.872340  | -0.744317 | 1.790269  |
| S                                                   | 1.488639  | -2.477167 | 0.190731  |
| H                                                   | 4.297796  | 0.225572  | 1.028783  |
| H                                                   | 4.069969  | -1.293034 | 0.319685  |
| H                                                   | 1.138320  | -2.193352 | -1.082849 |
| 28                                                  |           |           |           |
| Dimer 159 of the z...z type                         |           |           |           |
| C                                                   | 4.094242  | 0.219888  | 0.072639  |
| C                                                   | 2.759785  | -0.543143 | 0.404953  |
| O                                                   | 4.250800  | 1.304594  | 0.690354  |
| O                                                   | 4.842016  | -0.344782 | -0.742844 |
| H                                                   | 3.023971  | -1.428286 | 0.982986  |
| C                                                   | 2.011069  | -0.942039 | -0.857126 |
| N                                                   | 1.950178  | 0.357094  | 1.299860  |
| H                                                   | 1.597648  | -0.109023 | 2.134195  |
| H                                                   | 2.679446  | -1.544504 | -1.467176 |
| H                                                   | 1.722856  | -0.064436 | -1.438098 |
| S                                                   | 0.443472  | -1.876258 | -0.575783 |
| H                                                   | 2.626302  | 1.108769  | 1.553498  |
| H                                                   | 1.154202  | 0.792712  | 0.807302  |
| H                                                   | 0.952175  | -2.823156 | 0.238318  |
| C                                                   | -4.094344 | -0.219598 | 0.072595  |
| C                                                   | -2.759709 | 0.543067  | 0.404998  |
| O                                                   | -4.251103 | -1.304424 | 0.690013  |
| O                                                   | -4.842032 | 0.345474  | -0.742700 |
| H                                                   | -3.023664 | 1.428191  | 0.983154  |
| C                                                   | -2.010935 | 0.941926  | -0.857059 |
| N                                                   | -1.950323 | -0.357522 | 1.299773  |
| H                                                   | -1.597964 | 0.108380  | 2.134306  |
| H                                                   | -2.679279 | 1.544439  | -1.467100 |
| H                                                   | -1.722770 | 0.064307  | -1.438040 |
| S                                                   | -0.443303 | 1.876096  | -0.575738 |
| H                                                   | -2.626567 | -1.109184 | 1.553158  |
| H                                                   | -1.154232 | -0.793070 | 0.807355  |
| H                                                   | -0.951908 | 2.822959  | 0.238464  |
| 28                                                  |           |           |           |
| Dimer 160 of the z...z type                         |           |           |           |
| C                                                   | -3.195143 | -0.919512 | 0.478269  |
| C                                                   | -2.722234 | -0.131514 | -0.792712 |
| O                                                   | -4.406533 | -0.758477 | 0.774307  |
| O                                                   | -2.331327 | -1.623439 | 1.030944  |
| H                                                   | -2.805373 | -0.812662 | -1.642168 |
| C                                                   | -1.300586 | 0.401608  | -0.721327 |
| N                                                   | -3.726929 | 0.968441  | -1.021936 |
| H                                                   | -3.858649 | 1.210006  | -2.003762 |
| H                                                   | -1.052020 | 0.975070  | -1.616357 |
| H                                                   | -0.617402 | -0.443700 | -0.649412 |
| S                                                   | -1.026487 | 1.549461  | 0.697881  |
| H                                                   | -4.604365 | 0.618932  | -0.597769 |
| H                                                   | -3.453634 | 1.811212  | -0.506162 |
| H                                                   | -1.222015 | 0.618275  | 1.654692  |
| C                                                   | 2.017757  | -1.845112 | -0.423611 |
| C                                                   | 2.185834  | -0.461592 | 0.286733  |
| O                                                   | 3.023617  | -2.595331 | -0.380998 |
| O                                                   | 0.920905  | -2.016072 | -0.987670 |
| H                                                   | 1.321561  | -0.236268 | 0.907562  |
| C                                                   | 2.377795  | 0.624160  | -0.772715 |
| N                                                   | 3.393244  | -0.548682 | 1.180547  |
| H                                                   | 3.152354  | -0.909822 | 2.103681  |
| H                                                   | 1.480620  | 0.660458  | -1.386324 |
| H                                                   | 3.222161  | 0.380207  | -1.420477 |
| S                                                   | 2.745078  | 2.298279  | -0.095679 |

| Nov 11, 22 15:56 dimers_structures.xyz Page 314/325 |           |           |           |
|-----------------------------------------------------|-----------|-----------|-----------|
| H                                                   | 4.024076  | -1.237319 | 0.738719  |
| H                                                   | 3.848676  | 0.362264  | 1.300638  |
| H                                                   | 1.568514  | 2.439508  | 0.551159  |
| 28                                                  |           |           |           |
| Dimer 161 of the z...z type                         |           |           |           |
| C                                                   | 3.403334  | 1.408311  | 0.166684  |
| C                                                   | 2.998792  | 0.047134  | -0.494408 |
| O                                                   | 3.730357  | 1.337436  | 1.376936  |
| O                                                   | 3.307886  | 2.399470  | -0.579340 |
| H                                                   | 3.467858  | -0.054781 | -1.470616 |
| C                                                   | 1.478942  | -0.014074 | -0.601785 |
| N                                                   | 3.505071  | -1.062177 | 0.390301  |
| H                                                   | 4.472995  | -1.302291 | 0.174378  |
| H                                                   | 1.144793  | 0.838230  | -1.189988 |
| H                                                   | 1.020964  | 0.037408  | 0.388756  |
| S                                                   | 0.828593  | -1.575477 | -1.344834 |
| H                                                   | 3.494911  | -0.683359 | 1.351236  |
| H                                                   | 2.943739  | -1.915411 | 0.316041  |
| H                                                   | 1.311304  | -1.378516 | -2.588484 |
| C                                                   | -1.425317 | -1.089990 | 1.188389  |
| C                                                   | -2.012852 | -0.108256 | 0.123037  |
| O                                                   | -1.892098 | -2.252680 | 1.155221  |
| O                                                   | -0.587157 | -0.586432 | 1.962417  |
| H                                                   | -1.240221 | 0.562487  | -0.245532 |
| C                                                   | -3.158469 | 0.688752  | 0.739868  |
| N                                                   | -2.496798 | -0.920402 | -1.043224 |
| H                                                   | -1.689348 | -1.230403 | -1.597214 |
| H                                                   | -2.770831 | 1.236013  | 1.597346  |
| H                                                   | -3.947611 | 0.019280  | 1.087694  |
| S                                                   | -3.981754 | 1.856382  | -0.427154 |
| H                                                   | -2.951004 | -1.763269 | -0.668693 |
| H                                                   | -3.139864 | -0.392334 | -1.641010 |
| H                                                   | -2.903501 | 2.636901  | -0.644229 |
| 28                                                  |           |           |           |
| Dimer 162 of the z...z type                         |           |           |           |
| C                                                   | -1.165369 | -1.515033 | 0.072451  |
| C                                                   | -2.709241 | -1.274368 | 0.186691  |
| O                                                   | -0.542717 | -1.479666 | 1.167389  |
| O                                                   | -0.744513 | -1.764837 | -1.069345 |
| H                                                   | -3.181456 | -2.252589 | 0.079931  |
| C                                                   | -3.288359 | -0.324886 | -0.861332 |
| N                                                   | -2.975872 | -0.800487 | 1.588083  |
| H                                                   | -3.810063 | -1.199526 | 2.014975  |
| H                                                   | -4.376397 | -0.397287 | -0.885955 |
| H                                                   | -2.894614 | -0.624048 | -1.830681 |
| S                                                   | -2.928490 | 1.456530  | -0.553480 |
| H                                                   | -2.113751 | -1.062967 | 2.106752  |
| H                                                   | -3.047196 | 0.226345  | 1.592645  |
| H                                                   | -1.574281 | 1.440001  | -0.766730 |
| C                                                   | 0.943059  | 1.647984  | -0.073922 |
| C                                                   | 2.338250  | 0.966888  | -0.217215 |
| O                                                   | 0.651417  | 2.066400  | 1.069445  |
| O                                                   | 0.259240  | 1.658764  | -1.120505 |
| H                                                   | 2.840254  | 1.319737  | -1.115949 |
| C                                                   | 2.155677  | -0.546862 | -0.245641 |
| N                                                   | 3.173427  | 1.369999  | 0.970558  |
| H                                                   | 3.640415  | 2.264829  | 0.821518  |
| H                                                   | 1.496900  | -0.807595 | -1.070170 |
| H                                                   | 1.654939  | -0.893453 | 0.659351  |
| S                                                   | 3.729662  | -1.500161 | -0.349672 |
| H                                                   | 2.518174  | 1.495139  | 1.756936  |
| H                                                   | 3.888452  | 0.668060  | 1.186985  |
| H                                                   | 4.125466  | -1.032754 | -1.551732 |
| 28                                                  |           |           |           |
| Dimer 163 of the z...z type                         |           |           |           |
| C                                                   | 4.130553  | -0.215325 | -0.137490 |
| C                                                   | 2.758551  | 0.497367  | -0.428764 |
| O                                                   | 4.264866  | -1.345318 | -0.674491 |
| O                                                   | 4.921713  | 0.424158  | 0.575111  |

| Nov 11, 22 15:56 dimers_structures.xyz Page 315/325 |           |           |           |
|-----------------------------------------------------|-----------|-----------|-----------|
| H                                                   | 2.964164  | 1.371861  | -1.044684 |
| C                                                   | 2.067183  | 0.911163  | 0.861685  |
| N                                                   | 1.934977  | -0.460149 | -1.248572 |
| H                                                   | 1.600815  | -0.062358 | -2.124550 |
| H                                                   | 2.762969  | 1.521433  | 1.432311  |
| H                                                   | 1.806356  | 0.040241  | 1.465591  |
| S                                                   | 0.489139  | 1.844475  | 0.648181  |
| H                                                   | 2.603782  | -1.239744 | -1.435304 |
| H                                                   | 1.123924  | -0.838122 | -0.732812 |
| H                                                   | 0.966304  | 2.802113  | -0.172688 |
| C                                                   | -4.130780 | 0.214793  | -0.137627 |
| C                                                   | -2.758399 | -0.497427 | -0.428677 |
| O                                                   | -4.264932 | 1.345137  | -0.673953 |
| O                                                   | -4.922048 | -0.425255 | 0.574242  |
| H                                                   | -2.963475 | -1.371953 | -1.044707 |
| C                                                   | -2.067265 | -0.911029 | 0.861904  |
| N                                                   | -1.934918 | 0.460642  | -1.247981 |
| H                                                   | -1.601030 | 0.063550  | -2.124363 |
| H                                                   | -2.762867 | -1.521478 | 1.432577  |
| H                                                   | -1.806565 | -0.040042 | 1.465774  |
| S                                                   | -0.488924 | -1.844013 | 0.648286  |
| H                                                   | -2.604153 | 1.240276  | -1.433934 |
| H                                                   | -1.123769 | 0.838533  | -0.732340 |
| H                                                   | -0.966147 | -2.802177 | -0.171942 |
| 28                                                  |           |           |           |
| Dimer 164 of the z...z type                         |           |           |           |
| C                                                   | -3.589972 | -0.335213 | -0.869154 |
| C                                                   | -2.221298 | -0.064802 | -0.147521 |
| O                                                   | -4.245208 | 0.696235  | -1.170013 |
| O                                                   | -3.853458 | -1.531233 | -1.080581 |
| H                                                   | -1.436533 | -0.284731 | -0.870009 |
| C                                                   | -2.048980 | -0.905375 | 1.108801  |
| N                                                   | -2.160049 | 1.412677  | 0.144888  |
| H                                                   | -1.262473 | 1.851684  | -0.098651 |
| H                                                   | -2.163599 | -1.951186 | 0.834371  |
| H                                                   | -2.829607 | -0.663541 | 1.833527  |
| S                                                   | -0.445653 | -0.669837 | 1.994942  |
| H                                                   | -2.941605 | 1.803529  | -0.421054 |
| H                                                   | -2.344046 | 1.618823  | 1.127714  |
| H                                                   | 0.338442  | -1.365654 | 1.124760  |
| C                                                   | 2.676754  | -1.441139 | -0.486633 |
| C                                                   | 2.595347  | 0.024727  | 0.050200  |
| O                                                   | 3.660961  | -1.704428 | -1.210732 |
| O                                                   | 1.714123  | -2.163139 | -0.147940 |
| H                                                   | 2.401894  | 0.009112  | 1.120527  |
| C                                                   | 1.491972  | 0.771626  | -0.688509 |
| N                                                   | 3.927525  | 0.692995  | -0.163548 |
| H                                                   | 4.571620  | 0.492893  | 0.602683  |
| H                                                   | 0.609197  | 0.141565  | -0.678365 |
| H                                                   | 1.764296  | 0.948931  | -1.730404 |
| S                                                   | 1.087397  | 2.422115  | 0.027054  |
| H                                                   | 4.337549  | 0.276623  | -1.012910 |
| H                                                   | 3.852270  | 1.709905  | -0.252267 |
| H                                                   | 0.828077  | 1.957488  | 1.269786  |
| 28                                                  |           |           |           |
| Dimer 165 of the z...z type                         |           |           |           |
| C                                                   | 2.182088  | -1.376693 | -0.301908 |
| C                                                   | 1.912100  | -0.306268 | 0.811170  |
| O                                                   | 3.124544  | -2.169239 | -0.055674 |
| O                                                   | 1.418382  | -1.330653 | -1.283808 |
| H                                                   | 1.103113  | -0.691216 | 1.436199  |
| N                                                   | 1.534251  | 1.069761  | 0.282209  |
| C                                                   | 3.140019  | -0.256047 | 1.679127  |
| H                                                   | 2.949097  | -0.041326 | 2.657253  |
| H                                                   | 1.342560  | 1.765433  | 1.101073  |
| H                                                   | 0.636022  | 0.984342  | -0.325041 |
| S                                                   | 2.859013  | 1.847460  | -0.738700 |
| H                                                   | 3.581070  | -1.186734 | 1.575163  |
| H                                                   | 3.800546  | 0.436477  | 1.308556  |

| Nov 11, 22 15:56 dimers_structures.xyz Page 316/325 |           |           |           |
|-----------------------------------------------------|-----------|-----------|-----------|
| H                                                   | 2.808063  | 0.934057  | -1.730606 |
| C                                                   | -2.181966 | 1.376588  | -0.301826 |
| C                                                   | -1.911779 | 0.306392  | 0.811424  |
| O                                                   | -3.124379 | 2.169186  | -0.055588 |
| O                                                   | -1.418435 | 1.330345  | -1.283852 |
| H                                                   | -1.102676 | 0.691467  | 1.436226  |
| C                                                   | -1.534034 | -1.069745 | 0.282671  |
| N                                                   | -3.139539 | 0.256355  | 1.679618  |
| H                                                   | -2.948440 | 0.041827  | 2.657751  |
| H                                                   | -1.342195 | -1.765255 | 1.101637  |
| H                                                   | -0.635916 | -0.984453 | -0.324762 |
| S                                                   | -2.858991 | -1.847646 | -0.737832 |
| H                                                   | -3.580604 | 1.187024  | 1.575550  |
| H                                                   | -3.800139 | -0.436238 | 1.309309  |
| H                                                   | -2.808225 | -0.934438 | -1.729928 |
| 28                                                  |           |           |           |
| Dimer 166 of the z...z type                         |           |           |           |
| C                                                   | 2.140337  | -0.708250 | -1.101971 |
| C                                                   | 1.910038  | -0.613099 | 0.444388  |
| O                                                   | 3.158647  | -1.356206 | -1.448934 |
| O                                                   | 1.274431  | -0.154787 | -1.804581 |
| H                                                   | 1.191015  | -1.392626 | 0.701387  |
| C                                                   | 1.398260  | 0.736320  | 0.929677  |
| N                                                   | 3.207886  | -0.989978 | 1.106740  |
| H                                                   | 3.094449  | -1.460767 | 2.003994  |
| H                                                   | 1.254593  | 0.732282  | 2.011569  |
| H                                                   | 0.448382  | 0.963884  | 0.450006  |
| S                                                   | 2.562181  | 2.123283  | 0.577532  |
| H                                                   | 3.693952  | -1.594047 | 0.421280  |
| H                                                   | 3.788022  | -0.154118 | 1.238960  |
| H                                                   | 2.453059  | 2.041237  | -0.764820 |
| C                                                   | -2.439899 | 1.529028  | -0.316613 |
| C                                                   | -2.364202 | 0.154274  | 0.427082  |
| O                                                   | -3.559541 | 1.806009  | -0.812730 |
| O                                                   | -1.368551 | 2.160974  | -0.357389 |
| H                                                   | -1.816642 | 0.263578  | 1.361572  |
| C                                                   | -1.698431 | -0.876317 | -0.477418 |
| N                                                   | -3.772060 | -0.269004 | 0.755707  |
| H                                                   | -4.091197 | 0.129000  | 1.639254  |
| H                                                   | -0.721512 | -0.506978 | -0.786062 |
| H                                                   | -2.292523 | -1.030770 | -1.380949 |
| S                                                   | -1.536781 | -2.551460 | 0.283823  |
| H                                                   | -4.364769 | 0.129451  | 0.009004  |
| H                                                   | -3.868420 | -1.287614 | 0.808753  |
| H                                                   | -0.942109 | -2.148457 | 1.425460  |
| 28                                                  |           |           |           |
| Dimer 167 of the z...z type                         |           |           |           |
| C                                                   | 1.397182  | -0.625424 | 0.629007  |
| C                                                   | 2.053760  | 0.256421  | -0.486451 |
| O                                                   | 0.993325  | 0.010334  | 1.637189  |
| O                                                   | 1.320940  | -1.840001 | 0.377931  |
| H                                                   | 1.300009  | 0.410817  | -1.259875 |
| C                                                   | 3.295241  | -0.360996 | -1.114879 |
| N                                                   | 2.330290  | 1.601291  | 0.126639  |
| H                                                   | 2.132932  | 2.383186  | -0.496160 |
| H                                                   | 3.698499  | 0.278272  | -1.901367 |
| H                                                   | 3.011882  | -1.317210 | -1.548456 |
| S                                                   | 4.676140  | -0.616763 | 0.081184  |
| H                                                   | 1.708744  | 1.629837  | 0.957906  |
| H                                                   | 3.298681  | 1.657528  | 0.457158  |
| H                                                   | 4.016480  | -1.497818 | 0.861501  |
| C                                                   | -3.507468 | -1.275614 | -0.299247 |
| C                                                   | -3.123636 | 0.239517  | -0.395357 |
| O                                                   | -3.992602 | -1.634064 | 0.802642  |
| O                                                   | -3.244361 | -1.947487 | -1.312681 |
| H                                                   | -3.470764 | 0.660081  | -1.336749 |
| C                                                   | -1.611211 | 0.378072  | -0.256082 |
| N                                                   | -3.820035 | 0.961133  | 0.728402  |
| H                                                   | -4.758779 | 1.257874  | 0.461331  |

| Nov 11, 22 15:56            |           | dimers_structures.xyz |           | Page 317/325 |
|-----------------------------|-----------|-----------------------|-----------|--------------|
| H                           | -1.142991 | -0.200379             | -1.050044 |              |
| H                           | -1.268354 | -0.018824             | 0.700320  |              |
| S                           | -0.994388 | 2.114896              | -0.289201 |              |
| H                           | -3.923341 | 0.264685              | 1.485099  |              |
| H                           | -3.302103 | 1.787431              | 1.042359  |              |
| H                           | -1.422334 | 2.415311              | -1.532638 |              |
| 28                          |           |                       |           |              |
| Dimer 168 of the z...z type |           |                       |           |              |
| C                           | -1.618238 | -1.218034             | -0.179970 |              |
| C                           | -3.133266 | -0.951703             | -0.458094 |              |
| O                           | -1.342420 | -1.655208             | 0.961656  |              |
| O                           | -0.857538 | -0.966024             | -1.137348 |              |
| H                           | -3.481723 | -1.719483             | -1.150418 |              |
| C                           | -3.400007 | 0.425576              | -1.058738 |              |
| N                           | -3.869458 | -1.149402             | 0.839761  |              |
| H                           | -4.773927 | -1.607852             | 0.738026  |              |
| H                           | -4.450056 | 0.539134              | -1.331069 |              |
| H                           | -2.789594 | 0.522838              | -1.953633 |              |
| S                           | -3.040804 | 1.820838              | 0.094708  |              |
| H                           | -3.225724 | -1.707036             | 1.429382  |              |
| H                           | -4.000515 | -0.246859             | 1.311795  |              |
| H                           | -1.714958 | 1.591083              | 0.223182  |              |
| C                           | 3.138542  | -1.119000             | -0.102910 |              |
| C                           | 3.408143  | 0.238741              | 0.629450  |              |
| O                           | 3.678176  | -1.232104             | -1.234409 |              |
| O                           | 2.452376  | -1.937363             | 0.532648  |              |
| H                           | 4.133058  | 0.038345              | 1.420280  |              |
| C                           | 2.161557  | 0.874952              | 1.239409  |              |
| N                           | 4.071923  | 1.154805              | -0.362893 |              |
| H                           | 4.798926  | 1.747133              | 0.035449  |              |
| H                           | 2.425426  | 1.737461              | 1.853077  |              |
| H                           | 1.674932  | 0.129693              | 1.864818  |              |
| S                           | 0.969266  | 1.503769              | -0.018724 |              |
| H                           | 4.449279  | 0.520113              | -1.091094 |              |
| H                           | 3.362181  | 1.745069              | -0.814377 |              |
| H                           | 0.534915  | 0.301220              | -0.484506 |              |
| 28                          |           |                       |           |              |
| Dimer 169 of the z...z type |           |                       |           |              |
| C                           | -3.369971 | -0.586170             | 0.994684  |              |
| C                           | -2.003201 | -0.347691             | 0.263256  |              |
| O                           | -4.042673 | -1.550645             | 0.551974  |              |
| O                           | -3.617306 | 0.188732              | 1.936359  |              |
| H                           | -1.235922 | -0.850062             | 0.857536  |              |
| C                           | -1.628827 | 1.119054              | 0.099957  |              |
| N                           | -2.063952 | -1.065781             | -1.053174 |              |
| H                           | -1.151542 | -1.460447             | -1.319576 |              |
| H                           | -0.665203 | 1.232193              | -0.396127 |              |
| H                           | -1.566669 | 1.564910              | 1.089672  |              |
| S                           | -2.826798 | 2.072973              | -0.926940 |              |
| H                           | -2.772400 | -1.808249             | -0.922736 |              |
| H                           | -2.401811 | -0.439400             | -1.790208 |              |
| H                           | -3.870330 | 1.914596              | -0.086439 |              |
| C                           | 3.644976  | 1.216452              | 0.210821  |              |
| C                           | 3.274604  | -0.246548             | -0.215200 |              |
| O                           | 3.971418  | 1.353235              | 1.415220  |              |
| O                           | 3.525987  | 2.066279              | -0.689104 |              |
| H                           | 3.758022  | -0.500621             | -1.155922 |              |
| C                           | 1.757673  | -0.352014             | -0.339087 |              |
| N                           | 3.792002  | -1.178977             | 0.847807  |              |
| H                           | 4.761501  | -1.443591             | 0.670644  |              |
| H                           | 1.436293  | 0.372003              | -1.084691 |              |
| H                           | 1.280890  | -0.110250             | 0.613086  |              |
| S                           | 1.133427  | -2.029265             | -0.789470 |              |
| H                           | 3.783351  | -0.635297             | 1.727044  |              |
| H                           | 3.241604  | -2.038288             | 0.930853  |              |
| H                           | 1.648874  | -2.062817             | -2.035189 |              |
| 28                          |           |                       |           |              |
| Dimer 170 of the z...z type |           |                       |           |              |
| C                           | -3.133648 | -0.474732             | -1.054847 |              |

| Nov 11, 22 15:56            |           | dimers_structures.xyz |           | Page 318/325 |  |
|-----------------------------|-----------|-----------------------|-----------|--------------|--|
| C                           | -2.775052 | 0.395311              | 0.196603  |              |  |
| O                           | -3.342986 | -1.690199             | -0.818199 |              |  |
| O                           | -3.122438 | 0.137952              | -2.137979 |              |  |
| H                           | -3.336050 | 1.327445              | 0.187849  |              |  |
| C                           | -1.272006 | 0.653993              | 0.196956  |              |  |
| N                           | -3.171201 | -0.381349             | 1.424626  |              |  |
| H                           | -4.150255 | -0.227262             | 1.666727  |              |  |
| H                           | -1.022028 | 1.175191              | -0.725532 |              |  |
| H                           | -0.724686 | -0.292472             | 0.231149  |              |  |
| S                           | -0.653236 | 1.620897              | 1.638837  |              |  |
| H                           | -3.075007 | -1.377897             | 1.169891  |              |  |
| H                           | -2.599652 | -0.143458             | 2.240691  |              |  |
| H                           | -1.298197 | 2.770668              | 1.354599  |              |  |
| C                           | 1.845709  | -1.889474             | 0.234110  |              |  |
| C                           | 2.231401  | -0.375736             | 0.266377  |              |  |
| O                           | 2.806966  | -2.691195             | 0.161392  |              |  |
| O                           | 0.618438  | -2.108529             | 0.247567  |              |  |
| H                           | 1.671826  | 0.131534              | 1.047449  |              |  |
| C                           | 1.956566  | 0.253789              | -1.096165 |              |  |
| N                           | 3.693789  | -0.265510             | 0.608161  |              |  |
| H                           | 3.845135  | -0.277079             | 1.617676  |              |  |
| H                           | 0.937681  | 0.014079              | -1.387778 |              |  |
| H                           | 2.624409  | -0.164995             | -1.851835 |              |  |
| S                           | 2.219637  | 2.077850              | -1.148750 |              |  |
| H                           | 4.146025  | -1.110129             | 0.225415  |              |  |
| H                           | 4.118823  | 0.588027              | 0.234491  |              |  |
| H                           | 1.343788  | 2.371241              | -0.162122 |              |  |
| 28                          |           |                       |           |              |  |
| Dimer 171 of the z...z type |           |                       |           |              |  |
| C                           | 3.009093  | -0.861231             | 1.208613  |              |  |
| C                           | 1.893268  | -0.022438             | 0.496774  |              |  |
| O                           | 3.606444  | -0.264659             | 2.137114  |              |  |
| O                           | 3.153424  | -2.025012             | 0.788708  |              |  |
| H                           | 0.953921  | -0.255306             | 1.002728  |              |  |
| C                           | 1.746087  | -0.295557             | -0.993415 |              |  |
| N                           | 2.162341  | 1.431466              | 0.760139  |              |  |
| H                           | 1.304007  | 1.990593              | 0.685892  |              |  |
| H                           | 0.960068  | 0.321167              | -1.431127 |              |  |
| H                           | 1.489297  | -1.343752             | -1.125453 |              |  |
| S                           | 3.268621  | 0.088522              | -1.959593 |              |  |
| H                           | 2.581143  | 1.492918              | 1.697929  |              |  |
| H                           | 2.853214  | 1.787628              | 0.091144  |              |  |
| H                           | 4.033444  | -0.849150             | -1.362629 |              |  |
| C                           | -3.536905 | -1.363219             | -0.184225 |              |  |
| C                           | -3.121689 | 0.133249              | -0.403535 |              |  |
| O                           | -4.372222 | -1.554199             | 0.733126  |              |  |
| O                           | -2.952166 | -2.178484             | -0.918903 |              |  |
| H                           | -3.137174 | 0.378110              | -1.463276 |              |  |
| C                           | -1.728413 | 0.344085              | 0.181544  |              |  |
| N                           | -4.137910 | 0.997876              | 0.294552  |              |  |
| H                           | -4.935293 | 1.196838              | -0.310529 |              |  |
| H                           | -1.054732 | -0.339071             | -0.331380 |              |  |
| H                           | -1.716292 | 0.105388              | 1.246808  |              |  |
| S                           | -1.097332 | 2.074547              | 0.068488  |              |  |
| H                           | -4.491278 | 0.432607              | 1.084632  |              |  |
| H                           | -3.751512 | 1.891181              | 0.612996  |              |  |
| H                           | -1.052925 | 2.145843              | -1.277776 |              |  |
| 28                          |           |                       |           |              |  |
| Dimer 172 of the z...z type |           |                       |           |              |  |
| C                           | -3.568928 | -0.933322             | 0.117241  |              |  |
| C                           | -2.843155 | 0.355250              | -0.396366 |              |  |
| O                           | -4.402291 | -0.739630             | 1.038546  |              |  |
| O                           | -3.202709 | -1.996246             | -0.414435 |              |  |
| H                           | -2.770796 | 0.349900              | -1.481843 |              |  |
| C                           | -1.455721 | 0.428880              | 0.236399  |              |  |
| N                           | -3.677908 | 1.540729              | 0.012040  |              |  |
| H                           | -4.402447 | 1.748135              | -0.675671 |              |  |
| H                           | -0.873381 | -0.426287             | -0.106877 |              |  |
| H                           | -1.528710 | 0.399706              | 1.325935  |              |  |



| Nov 11, 22 15:56            |           |           |           | dimers_structures.xyz | Page 319/325 |
|-----------------------------|-----------|-----------|-----------|-----------------------|--------------|
| S                           | -0.531397 | 1.981294  | -0.141304 |                       |              |
| H                           | -4.153680 | 1.259813  | 0.885220  |                       |              |
| H                           | -3.109682 | 2.383960  | 0.143294  |                       |              |
| H                           | -0.411400 | 1.771686  | -1.467998 |                       |              |
| C                           | 1.663352  | -1.908270 | -0.355426 |                       |              |
| C                           | 2.145091  | -0.600144 | 0.352313  |                       |              |
| O                           | 2.427760  | -2.896225 | -0.233481 |                       |              |
| O                           | 0.600162  | -1.797043 | -0.994996 |                       |              |
| H                           | 1.328390  | -0.126243 | 0.891041  |                       |              |
| C                           | 2.713147  | 0.354310  | -0.695886 |                       |              |
| N                           | 3.203579  | -0.978446 | 1.353149  |                       |              |
| H                           | 2.792492  | -1.258169 | 2.244104  |                       |              |
| H                           | 1.920495  | 0.580424  | -1.405583 |                       |              |
| H                           | 3.536849  | -0.115915 | -1.236800 |                       |              |
| S                           | 3.401078  | 1.918286  | -0.006618 |                       |              |
| C                           | 3.682800  | -1.806747 | 0.966924  |                       |              |
| H                           | 3.859018  | -0.210159 | 1.529593  |                       |              |
| H                           | 2.229365  | 2.373576  | 0.484358  |                       |              |
| 28                          |           |           |           |                       |              |
| Dimer 173 of the z...z type |           |           |           |                       |              |
| C                           | 1.786943  | 0.648263  | 1.156060  |                       |              |
| C                           | 2.184423  | 0.788341  | -0.353650 |                       |              |
| O                           | 2.371224  | 1.444413  | 1.930446  |                       |              |
| O                           | 0.925568  | -0.215319 | 1.404734  |                       |              |
| H                           | 1.461774  | 1.464065  | -0.814641 |                       |              |
| C                           | 2.208263  | -0.526648 | -1.120379 |                       |              |
| N                           | 3.514716  | 1.488950  | -0.395944 |                       |              |
| H                           | 3.653743  | 2.063736  | -1.226802 |                       |              |
| H                           | 2.463360  | -0.370304 | -2.169300 |                       |              |
| H                           | 1.218869  | -0.972232 | -1.062408 |                       |              |
| S                           | 3.441219  | -1.732310 | -0.468284 |                       |              |
| H                           | 3.547753  | 2.060620  | 0.465600  |                       |              |
| H                           | 4.274305  | 0.801327  | -0.336814 |                       |              |
| H                           | 2.844089  | -1.882562 | 0.732492  |                       |              |
| C                           | -2.887348 | -0.509234 | 1.098349  |                       |              |
| C                           | -1.806332 | -0.673015 | -0.021291 |                       |              |
| O                           | -3.717376 | -1.452543 | 1.168367  |                       |              |
| O                           | -2.793808 | 0.513850  | 1.800869  |                       |              |
| H                           | -0.927139 | -1.126196 | 0.438960  |                       |              |
| C                           | -1.376367 | 0.625830  | -0.682606 |                       |              |
| N                           | -2.358685 | -1.656778 | -1.018690 |                       |              |
| H                           | -1.648548 | -2.230410 | -1.472520 |                       |              |
| H                           | -0.644068 | 0.440211  | -1.469036 |                       |              |
| H                           | -0.924190 | 1.251124  | 0.082066  |                       |              |
| S                           | -2.752731 | 1.537183  | -1.505167 |                       |              |
| H                           | -3.019455 | -2.239205 | -0.474110 |                       |              |
| H                           | -2.901737 | -1.168981 | -1.738692 |                       |              |
| H                           | -3.449137 | 1.761187  | -0.371366 |                       |              |
| 28                          |           |           |           |                       |              |
| Dimer 174 of the z...z type |           |           |           |                       |              |
| C                           | 3.417557  | 0.810934  | 0.366146  |                       |              |
| C                           | 3.564341  | -0.430082 | -0.578208 |                       |              |
| O                           | 3.873921  | 0.652695  | 1.527890  |                       |              |
| O                           | 2.895962  | 1.814091  | -0.150608 |                       |              |
| H                           | 4.407182  | -0.229836 | -1.242399 |                       |              |
| C                           | 2.325889  | -0.726988 | -1.415455 |                       |              |
| N                           | 3.950376  | -1.602729 | 0.283568  |                       |              |
| H                           | 4.596683  | -2.252034 | -0.163446 |                       |              |
| H                           | 2.509127  | -1.551077 | -2.106307 |                       |              |
| H                           | 2.085123  | 0.166119  | -1.987632 |                       |              |
| S                           | 0.861881  | -1.229102 | -0.414933 |                       |              |
| H                           | 4.362686  | -1.178768 | 1.134449  |                       |              |
| H                           | 3.108837  | -2.113028 | 0.576073  |                       |              |
| H                           | 0.678958  | -0.047858 | 0.219570  |                       |              |
| C                           | -1.440059 | 1.501691  | 0.179337  |                       |              |
| C                           | -2.822073 | 0.792121  | 0.351753  |                       |              |
| O                           | -1.242956 | 2.034470  | -0.937684 |                       |              |
| O                           | -0.674488 | 1.397386  | 1.158623  |                       |              |
| H                           | -3.272721 | 1.062055  | 1.304647  |                       |              |

| Nov 11, 22 15:56            |           |           |           | dimers_structures.xyz | Page 320/325 |
|-----------------------------|-----------|-----------|-----------|-----------------------|--------------|
| C                           | -2.620839 | -0.719334 | 0.256554  |                       |              |
| N                           | -3.729135 | 1.272913  | -0.748993 |                       |              |
| H                           | -4.213646 | 2.132572  | -0.489982 |                       |              |
| H                           | -1.941817 | -1.020122 | 1.051772  |                       |              |
| H                           | -2.162873 | -0.984224 | -0.698114 |                       |              |
| S                           | -4.173826 | -1.707683 | 0.344728  |                       |              |
| H                           | -3.114069 | 1.498617  | -1.547064 |                       |              |
| H                           | -4.433968 | 0.572449  | -1.000838 |                       |              |
| H                           | -4.535481 | -1.316799 | 1.583999  |                       |              |
| 28                          |           |           |           |                       |              |
| Dimer 175 of the z...z type |           |           |           |                       |              |
| C                           | 3.271864  | 0.908336  | -0.519620 |                       |              |
| C                           | 3.169477  | -0.604949 | -0.916903 |                       |              |
| O                           | 4.359358  | 1.239795  | 0.016399  |                       |              |
| O                           | 2.279750  | 1.602082  | -0.801807 |                       |              |
| H                           | 3.422951  | -0.677082 | -1.976457 |                       |              |
| C                           | 1.796674  | -1.222498 | -0.692803 |                       |              |
| N                           | 4.251164  | -1.333440 | -0.163359 |                       |              |
| H                           | 4.640378  | -2.130647 | -0.666347 |                       |              |
| H                           | 1.782148  | -2.274342 | -0.980564 |                       |              |
| H                           | 1.078286  | -0.678867 | -1.301390 |                       |              |
| S                           | 1.255614  | -1.168928 | 1.071134  |                       |              |
| H                           | 4.972613  | -0.613437 | 0.021775  |                       |              |
| H                           | 3.906726  | -1.653522 | 0.747081  |                       |              |
| H                           | 1.082205  | 0.169745  | 1.132322  |                       |              |
| C                           | -1.462053 | 1.454684  | 0.461842  |                       |              |
| C                           | -2.227565 | 0.181054  | -0.024114 |                       |              |
| O                           | -0.977477 | 1.396773  | 1.617402  |                       |              |
| O                           | -1.443024 | 2.386744  | -0.364853 |                       |              |
| H                           | -1.791221 | -0.159980 | -0.962837 |                       |              |
| C                           | -3.710919 | 0.486756  | -0.211489 |                       |              |
| N                           | -2.035652 | -0.925981 | 0.972966  |                       |              |
| H                           | -1.050828 | -1.244546 | 0.965012  |                       |              |
| H                           | -3.798679 | 1.310119  | -0.916791 |                       |              |
| H                           | -4.163814 | 0.796374  | 0.733144  |                       |              |
| S                           | -4.717396 | -0.948540 | -0.789262 |                       |              |
| H                           | -2.208664 | -0.568238 | 1.916455  |                       |              |
| H                           | -2.655227 | -1.718356 | 0.778895  |                       |              |
| H                           | -4.110658 | -1.085251 | -1.986096 |                       |              |
| 28                          |           |           |           |                       |              |
| Dimer 176 of the z...z type |           |           |           |                       |              |
| C                           | -1.105759 | 1.346810  | -0.046979 |                       |              |
| C                           | -2.026904 | 0.116603  | 0.223655  |                       |              |
| O                           | -1.125035 | 2.248542  | 0.819235  |                       |              |
| O                           | -0.468658 | 1.289673  | -1.121352 |                       |              |
| H                           | -1.477050 | -0.809273 | 0.063973  |                       |              |
| C                           | -3.243513 | 0.180972  | -0.698072 |                       |              |
| N                           | -2.450332 | 0.161162  | 1.667636  |                       |              |
| H                           | -1.765487 | -0.290625 | 2.274076  |                       |              |
| H                           | -2.886999 | 0.173601  | -1.726012 |                       |              |
| H                           | -3.799112 | 1.106710  | -0.534180 |                       |              |
| S                           | -4.467117 | -1.173169 | -0.440479 |                       |              |
| H                           | -2.480446 | 1.156926  | 1.935011  |                       |              |
| H                           | -3.356493 | -0.295187 | 1.816106  |                       |              |
| H                           | -3.636923 | -2.188684 | -0.754718 |                       |              |
| C                           | 2.432153  | -2.036607 | -0.125520 |                       |              |
| C                           | 2.030494  | -0.545474 | 0.093788  |                       |              |
| O                           | 3.102562  | -2.556955 | 0.801679  |                       |              |
| O                           | 2.073454  | -2.521737 | -1.215457 |                       |              |
| H                           | 0.991453  | -0.382877 | -0.178013 |                       |              |
| C                           | 2.929499  | 0.362519  | -0.745719 |                       |              |
| N                           | 2.190783  | -0.225356 | 1.556624  |                       |              |
| H                           | 1.357992  | -0.472060 | 2.090763  |                       |              |
| H                           | 2.766224  | 0.114643  | -1.792714 |                       |              |
| H                           | 3.981442  | 0.188246  | -0.510145 |                       |              |
| S                           | 2.636476  | 2.163682  | -0.468807 |                       |              |
| H                           | 2.962135  | -0.816638 | 1.901961  |                       |              |
| H                           | 2.383194  | 0.772899  | 1.700538  |                       |              |
| H                           | 1.312766  | 2.118347  | -0.787665 |                       |              |

| Nov 11, 22 15:56            | dimers_structures.xyz | Page 321/325 |
|-----------------------------|-----------------------|--------------|
| 28                          |                       |              |
| Dimer 177 of the z...z type |                       |              |
| C                           | -1.539509             | 1.392492     |
| C                           | -3.007704             | 0.905162     |
| O                           | -0.894113             | 1.670633     |
| O                           | -1.183731             | 1.459508     |
| H                           | -3.658074             | 1.776593     |
| C                           | -3.473574             | -0.183175    |
| N                           | -3.087325             | 0.461946     |
| H                           | -3.998837             | 0.612483     |
| H                           | -4.511654             | -0.459497    |
| H                           | -3.390518             | 0.201569     |
| S                           | -2.505621             | -1.747232    |
| H                           | -2.346942             | 0.996075     |
| H                           | -2.846161             | -0.533336    |
| H                           | -1.315826             | -1.208827    |
| C                           | 2.882113              | 1.018823     |
| C                           | 3.242342              | -0.484369    |
| O                           | 2.632326              | 1.304423     |
| O                           | 2.921533              | 1.757785     |
| H                           | 4.330825              | -0.542397    |
| C                           | 2.636802              | -1.068446    |
| N                           | 2.828089              | -1.254605    |
| H                           | 3.445666              | -2.031431    |
| H                           | 3.014846              | -2.074501    |
| H                           | 2.918427              | -0.425021    |
| S                           | 0.801840              | -1.234599    |
| H                           | 2.802526              | -0.546744    |
| H                           | 1.871389              | -1.608971    |
| H                           | 0.501638              | 0.083484     |
| 28                          |                       |              |
| Dimer 178 of the z...z type |                       |              |
| C                           | 3.382664              | 0.851496     |
| C                           | 2.756595              | -0.317091    |
| O                           | 4.061717              | 0.489589     |
| O                           | 3.095196              | 1.994067     |
| H                           | 2.888380              | -0.137573    |
| C                           | 1.276504              | -0.436665    |
| N                           | 3.494555              | -1.580260    |
| H                           | 4.327620              | -1.704137    |
| H                           | 0.786277              | 0.500677     |
| H                           | 1.150483              | -0.615486    |
| S                           | 0.405170              | -1.839844    |
| H                           | 3.813263              | -1.449953    |
| H                           | 2.910420              | -2.416185    |
| H                           | 0.644221              | -1.443307    |
| C                           | -1.727045             | 2.019185     |
| C                           | -2.668214             | 0.767879     |
| O                           | -0.808047             | 1.969528     |
| O                           | -1.967413             | 2.885545     |
| H                           | -3.710751             | 1.075863     |
| C                           | -2.323154             | -0.078708    |
| N                           | -2.436579             | 0.007981     |
| H                           | -3.139836             | 0.224139     |
| H                           | -2.556894             | 0.506184     |
| H                           | -1.259674             | -0.310665    |
| S                           | -3.163491             | -1.714938    |
| H                           | -1.518066             | 0.352098     |
| H                           | -2.419851             | -1.006495    |
| H                           | -4.423998             | -1.239099    |
| 28                          |                       |              |
| Dimer 179 of the z...z type |                       |              |
| C                           | -3.639934             | -0.141305    |
| C                           | -3.125558             | 0.242903     |
| O                           | -3.338905             | -1.299954    |
| O                           | -4.243806             | 0.765078     |
| H                           | -3.904296             | 0.752156     |
| C                           | -1.893515             | 1.134093     |
| N                           | -2.780236             | -1.030512    |

| Nov 11, 22 15:56            | dimers_structures.xyz | Page 322/325 |
|-----------------------------|-----------------------|--------------|
| H                           | -3.593418             | -1.425840    |
| H                           | -2.186626             | 2.032138     |
| H                           | -1.125657             | 0.622221     |
| S                           | -1.077824             | 1.592039     |
| H                           | -2.488445             | -1.699214    |
| H                           | -2.034388             | -0.898510    |
| H                           | -2.120965             | 2.269527     |
| C                           | 3.714423              | 0.704557     |
| C                           | 3.010999              | -0.590302    |
| O                           | 4.491471              | 1.262161     |
| O                           | 3.383286              | 1.043631     |
| H                           | 3.062134              | -1.383381    |
| C                           | 1.560334              | -0.261744    |
| N                           | 3.758040              | -1.042052    |
| H                           | 4.526045              | -1.670259    |
| H                           | 1.081282              | 0.104745     |
| H                           | 1.514762              | 0.524330     |
| S                           | 0.600267              | -1.671180    |
| H                           | 4.177880              | -0.183776    |
| H                           | 3.156968              | -1.519337    |
| H                           | 0.634130              | -2.447128    |
| 28                          |                       |              |
| Dimer 180 of the z...z type |                       |              |
| C                           | -3.916124             | -0.726405    |
| C                           | -2.459798             | -0.269782    |
| O                           | -4.393050             | -1.628137    |
| O                           | -4.427939             | -0.131398    |
| H                           | -1.819663             | -0.376286    |
| C                           | -2.475181             | 1.173299     |
| N                           | -1.973811             | -1.216921    |
| H                           | -1.274752             | -1.874514    |
| H                           | -2.950652             | 1.781250     |
| H                           | -3.063052             | 1.263916     |
| S                           | -0.823987             | 1.895570     |
| H                           | -2.842101             | -1.745584    |
| H                           | -1.587011             | -0.748948    |
| H                           | -0.322811             | 1.866338     |
| C                           | 2.295163              | 1.518774     |
| C                           | 2.094390              | 0.036870     |
| O                           | 2.828410              | 2.268064     |
| O                           | 1.907532              | 1.772851     |
| H                           | 1.160449              | -0.346841    |
| C                           | 3.266906              | -0.820956    |
| N                           | 1.984293              | 0.017270     |
| H                           | 1.076689              | 0.406729     |
| H                           | 3.343241              | -0.744615    |
| H                           | 4.200700              | -0.461642    |
| S                           | 3.138549              | -2.594759    |
| H                           | 2.707925              | 0.640243     |
| H                           | 2.083107              | -0.928589    |
| H                           | 2.029816              | -2.868736    |
| 28                          |                       |              |
| Dimer 181 of the z...z type |                       |              |
| C                           | -3.214008             | 0.328946     |
| C                           | -1.919114             | 0.437628     |
| O                           | -3.681734             | 1.429464     |
| O                           | -3.611477             | -0.827534    |
| H                           | -1.070867             | 0.301592     |
| C                           | -1.832511             | -0.584521    |
| N                           | -1.851274             | 1.849592     |
| H                           | -0.902899             | 2.200403     |
| H                           | -0.909459             | -0.472827    |
| H                           | -1.849550             | -1.575866    |
| S                           | -3.197699             | -0.436923    |
| H                           | -2.368469             | 2.414060     |
| H                           | -2.358921             | 1.923108     |
| H                           | -4.184315             | -0.744855    |
| C                           | 3.801701              | 1.114857     |
| C                           | 3.282180              | -0.256885    |

| Nov 11, 22 15:56 dimers_structures.xyz Page 323/325 |           |           |           |
|-----------------------------------------------------|-----------|-----------|-----------|
| O                                                   | 4.205813  | 1.092748  | 1.340958  |
| O                                                   | 3.705884  | 2.067124  | -0.642794 |
| H                                                   | 3.675368  | -0.444186 | -1.394070 |
| C                                                   | 1.755404  | -0.235350 | -0.413330 |
| N                                                   | 3.784213  | -1.338247 | 0.521562  |
| H                                                   | 4.704250  | -1.676658 | 0.239012  |
| H                                                   | 1.438512  | 0.571526  | -1.071807 |
| H                                                   | 1.372089  | -0.028844 | 0.588132  |
| S                                                   | 0.962432  | -1.819514 | -0.924323 |
| H                                                   | 3.893753  | -0.887033 | 1.445605  |
| H                                                   | 3.148589  | -2.141213 | 0.563372  |
| H                                                   | 1.455820  | -1.838080 | -2.179168 |
| 28                                                  |           |           |           |
| Dimer 182 of the z...z type                         |           |           |           |
| C                                                   | -4.147917 | -0.491119 | -0.202813 |
| C                                                   | -3.164799 | 0.507028  | 0.502780  |
| O                                                   | -4.571886 | -1.418002 | 0.531633  |
| O                                                   | -4.408243 | -0.237390 | -1.392655 |
| H                                                   | -3.764343 | 1.346537  | 0.861323  |
| C                                                   | -2.052941 | 1.039978  | -0.387931 |
| N                                                   | -2.629878 | -0.192168 | 1.723981  |
| H                                                   | -2.395553 | 0.435817  | 2.492770  |
| H                                                   | -1.398493 | 1.717215  | 0.161201  |
| H                                                   | -2.511084 | 1.580643  | -1.212534 |
| S                                                   | -0.948004 | -0.266293 | -1.074040 |
| H                                                   | -3.371371 | -0.860335 | 1.996284  |
| H                                                   | -1.801411 | -0.745403 | 1.485243  |
| H                                                   | -1.910766 | -0.927664 | -1.748518 |
| C                                                   | 3.947675  | -1.086312 | -0.226179 |
| C                                                   | 2.623299  | -0.251598 | -0.157522 |
| O                                                   | 4.135909  | -1.867349 | 0.741367  |
| O                                                   | 4.668185  | -0.849525 | -1.211044 |
| H                                                   | 2.088903  | -0.322367 | -1.101936 |
| C                                                   | 2.954808  | 1.202210  | 0.166958  |
| N                                                   | 1.767256  | -0.863790 | 0.919560  |
| H                                                   | 1.075642  | -1.508600 | 0.534982  |
| H                                                   | 3.621492  | 1.576939  | -0.606792 |
| H                                                   | 3.470621  | 1.272670  | 1.127106  |
| S                                                   | 1.487949  | 2.310481  | 0.320957  |
| H                                                   | 2.435569  | -1.407948 | 1.499167  |
| H                                                   | 1.263090  | -0.166583 | 1.472847  |
| H                                                   | 1.044468  | 2.150772  | -0.942767 |
| 28                                                  |           |           |           |
| Dimer 183 of the z...z type                         |           |           |           |
| C                                                   | -2.711161 | 1.654096  | -0.377218 |
| C                                                   | -1.956700 | 0.294161  | -0.188249 |
| O                                                   | -2.535548 | 2.487119  | 0.546181  |
| O                                                   | -3.371670 | 1.760559  | -1.427262 |
| H                                                   | -1.006094 | 0.384758  | -0.718946 |
| C                                                   | -2.697604 | -0.926739 | -0.713515 |
| N                                                   | -1.625224 | 0.153263  | 1.269710  |
| H                                                   | -0.790066 | -0.423533 | 1.420832  |
| H                                                   | -2.108332 | -1.833749 | -0.571387 |
| H                                                   | -2.874159 | -0.785151 | -1.776903 |
| S                                                   | -4.307117 | -1.228590 | 0.135445  |
| H                                                   | -1.498024 | 1.110462  | 1.630182  |
| H                                                   | -2.417908 | -0.261929 | 1.770624  |
| H                                                   | -4.887687 | -0.085121 | -0.284138 |
| C                                                   | 4.473189  | 0.417580  | -0.322554 |
| C                                                   | 3.215441  | -0.211214 | 0.382842  |
| O                                                   | 4.694636  | 1.619258  | -0.024182 |
| O                                                   | 5.112509  | -0.349763 | -1.060490 |
| H                                                   | 3.585180  | -0.848022 | 1.187112  |
| C                                                   | 2.346412  | -1.010580 | -0.571851 |
| N                                                   | 2.469312  | 0.924399  | 1.035760  |
| H                                                   | 2.106253  | 0.699089  | 1.960989  |
| H                                                   | 2.975239  | -1.755470 | -1.052946 |
| H                                                   | 1.928265  | -0.369274 | -1.350446 |
| S                                                   | 0.895402  | -1.848766 | 0.203705  |

| Nov 11, 22 15:56 dimers_structures.xyz Page 324/325 |           |           |           |
|-----------------------------------------------------|-----------|-----------|-----------|
| H                                                   | 3.178956  | 1.685504  | 1.077049  |
| H                                                   | 1.694644  | 1.261144  | 0.462173  |
| H                                                   | 1.575681  | -2.525845 | 1.150404  |
| 28                                                  |           |           |           |
| Dimer 184 of the z...z type                         |           |           |           |
| C                                                   | -1.680719 | 0.460984  | 1.046062  |
| C                                                   | -3.200336 | 0.368008  | 0.724996  |
| O                                                   | -1.109243 | 1.527289  | 0.735942  |
| O                                                   | -1.181722 | -0.552939 | 1.596035  |
| H                                                   | -3.743561 | 0.578196  | 1.648793  |
| C                                                   | -3.641033 | -0.986075 | 0.178554  |
| N                                                   | -3.512160 | 1.484670  | -0.233042 |
| H                                                   | -4.450567 | 1.869671  | -0.123816 |
| H                                                   | -4.718567 | -1.008256 | 0.012270  |
| H                                                   | -3.386121 | -1.749232 | 0.909618  |
| S                                                   | -2.881588 | -1.410352 | -1.446386 |
| H                                                   | -2.793498 | 2.208796  | -0.068771 |
| H                                                   | -3.397826 | 1.155813  | -1.199551 |
| H                                                   | -1.616056 | -1.523696 | -0.994541 |
| C                                                   | 3.387291  | -1.080180 | 0.054652  |
| C                                                   | 1.887860  | -0.635111 | 0.032075  |
| O                                                   | 3.860175  | -1.314255 | 1.195095  |
| O                                                   | 3.938511  | -1.183974 | -1.059943 |
| H                                                   | 1.297316  | -1.530308 | -0.182607 |
| C                                                   | 1.552765  | 0.421311  | -1.014515 |
| N                                                   | 1.496139  | -0.187481 | 1.405329  |
| H                                                   | 0.467388  | -0.346494 | 1.594989  |
| H                                                   | 0.493527  | 0.676011  | -0.981733 |
| H                                                   | 1.801547  | 0.030473  | -1.997823 |
| S                                                   | 2.430926  | 2.022683  | -0.758573 |
| H                                                   | 2.104990  | -0.695862 | 2.058984  |
| H                                                   | 1.695484  | 0.811185  | 1.512793  |
| H                                                   | 3.671956  | 1.543500  | -0.983241 |
| 28                                                  |           |           |           |
| Dimer 185 of the z...z type                         |           |           |           |
| C                                                   | -1.616033 | -1.360679 | -0.120821 |
| C                                                   | -3.074608 | -0.824198 | -0.150539 |
| O                                                   | -1.139754 | -1.632405 | 1.000255  |
| O                                                   | -1.070414 | -1.478294 | -1.247575 |
| H                                                   | -3.708666 | -1.623831 | -0.537880 |
| C                                                   | -3.259304 | 0.425613  | -1.013227 |
| N                                                   | -3.482620 | -0.574561 | 1.274843  |
| H                                                   | -4.453713 | -0.812455 | 1.475113  |
| H                                                   | -4.319079 | 0.652030  | -1.135509 |
| H                                                   | -2.831200 | 0.224853  | -1.992455 |
| S                                                   | -2.514804 | 1.952072  | -0.298249 |
| H                                                   | -2.832769 | -1.131681 | 1.855096  |
| H                                                   | -3.322302 | 0.417484  | 1.500917  |
| H                                                   | -1.197556 | 1.595974  | -0.384949 |
| C                                                   | 1.216444  | 0.728784  | 0.570527  |
| C                                                   | 1.866341  | -0.669618 | 0.364543  |
| O                                                   | 0.709347  | 1.262352  | -0.451397 |
| O                                                   | 1.282281  | 1.176274  | 1.731873  |
| H                                                   | 1.365025  | -1.367142 | 1.036566  |
| C                                                   | 3.362964  | -0.664973 | 0.666291  |
| N                                                   | 1.583676  | -1.145850 | -1.027833 |
| H                                                   | 0.539997  | -1.333263 | -1.142997 |
| H                                                   | 3.787665  | -1.664218 | 0.553591  |
| H                                                   | 3.504772  | -0.349284 | 1.697800  |
| S                                                   | 4.372397  | 0.411632  | -0.442578 |
| H                                                   | 1.838979  | -0.412843 | -1.692834 |
| H                                                   | 2.100154  | -1.995784 | -1.255791 |
| H                                                   | 3.873310  | 1.590790  | -0.018400 |
| 28                                                  |           |           |           |
| Dimer 186 of the z...z type                         |           |           |           |
| C                                                   | -3.086130 | -1.169035 | -0.083952 |
| C                                                   | -3.399415 | 0.262415  | -0.638541 |
| O                                                   | -3.667055 | -1.457999 | 0.995698  |
| O                                                   | -2.333495 | -1.864015 | -0.786446 |

Nov 11, 22 15:56

dimers\_structures.xyz

Page 325/325

|   |           |           |           |
|---|-----------|-----------|-----------|
| H | -4.088688 | 0.136212  | -1.475676 |
| C | -2.175167 | 1.038333  | -1.117505 |
| N | -4.145986 | 0.993139  | 0.444725  |
| H | -4.924135 | 1.559418  | 0.109490  |
| H | -2.472048 | 1.950829  | -1.635762 |
| H | -1.625397 | 0.406209  | -1.810994 |
| S | -1.055888 | 1.589701  | 0.238118  |
| H | -4.466794 | 0.231458  | 1.076930  |
| H | -3.500000 | 1.586424  | 0.979270  |
| H | -0.534753 | 0.377408  | 0.570913  |
| C | 1.696026  | -1.286490 | 0.297515  |
| C | 3.174552  | -0.838487 | 0.550012  |
| O | 1.518280  | -1.991617 | -0.724669 |
| O | 0.869245  | -0.914710 | 1.154705  |
| H | 3.574327  | -1.479382 | 1.338457  |
| C | 3.331310  | 0.620106  | 0.970654  |
| N | 3.941646  | -1.150807 | -0.705291 |
| H | 4.886569  | -1.496876 | -0.543363 |
| H | 4.360333  | 0.833113  | 1.263161  |
| H | 2.682147  | 0.797338  | 1.824950  |
| S | 2.946127  | 1.836081  | -0.360574 |
| H | 3.356014  | -1.855477 | -1.193650 |
| H | 3.985735  | -0.318189 | -1.305445 |
| H | 1.610389  | 1.628352  | -0.398419 |
